# Supplementary material for: Revealing an unprecedented diversity of episymbiotic Saccharibacteria in a high-quality genome collection
Source: PubMed Central journal article supplement — NPJ Biofilms Microbiomes. 2024 Dec 19;10:153. doi: 10.1038/s41522-024-00617-2 (PMC11659515; doi:10.1038/s41522-024-00617-2), 2024-12-19
Supplement: 41522_2024_617_MOESM1_ESM.pdf [file 41522_2024_617_MOESM1_ESM.pdf]

# Supplementary Figures:

## Revealing an unprecedented diversity of episymbiotic Saccharibacteria in a high-quality genome collection

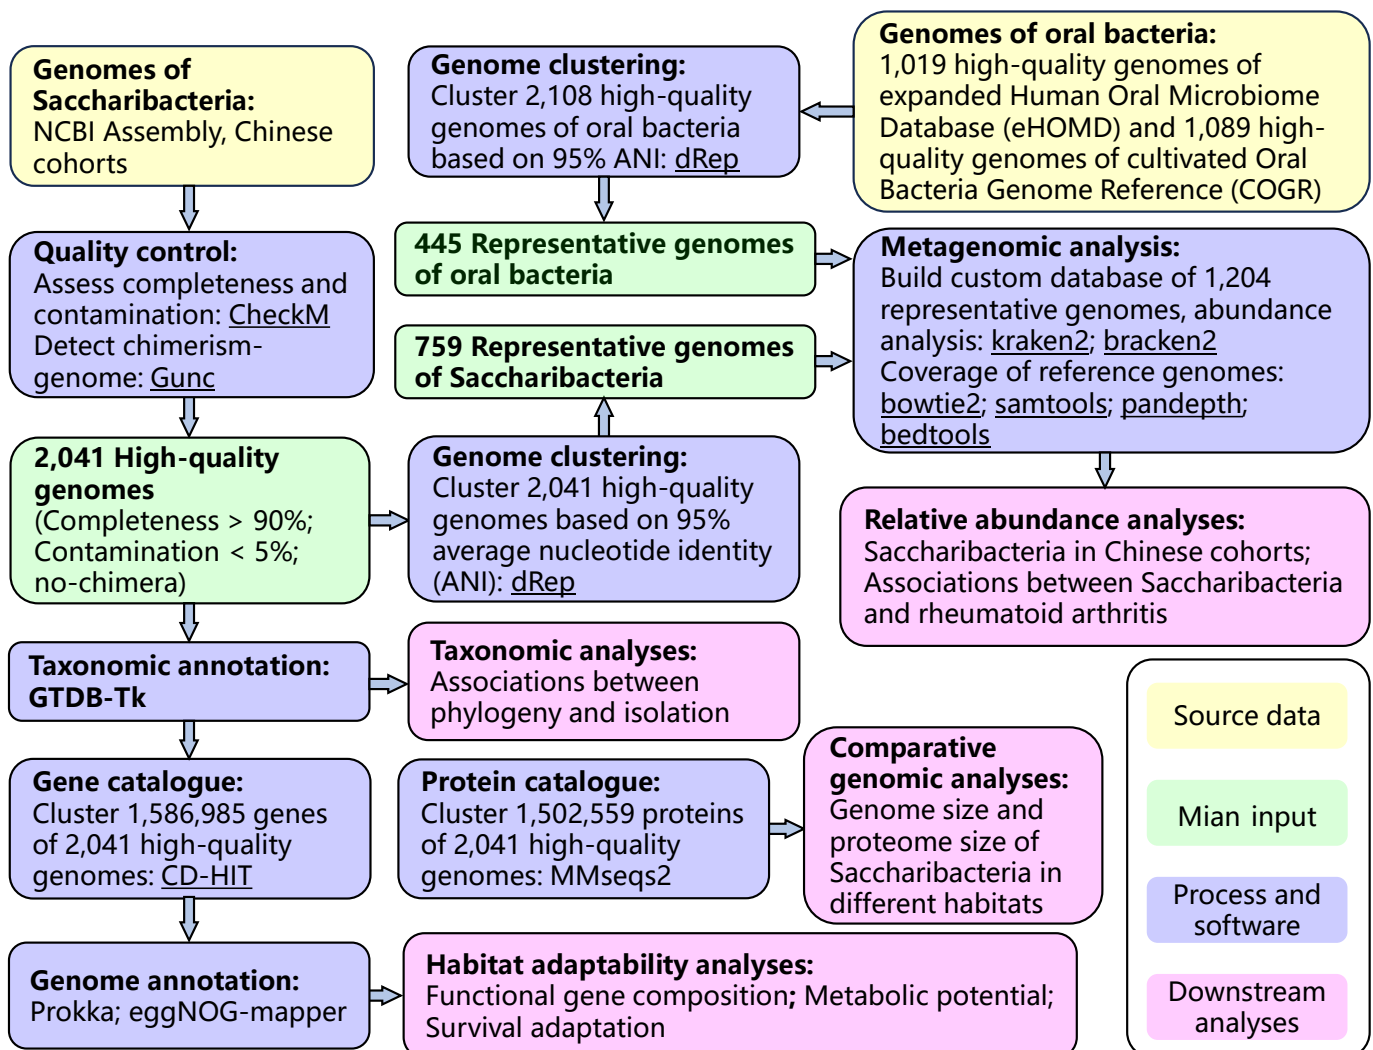

Supplementary Fig. 1 | The construction of the genome collection of Saccharibacteria and analysis workflow.

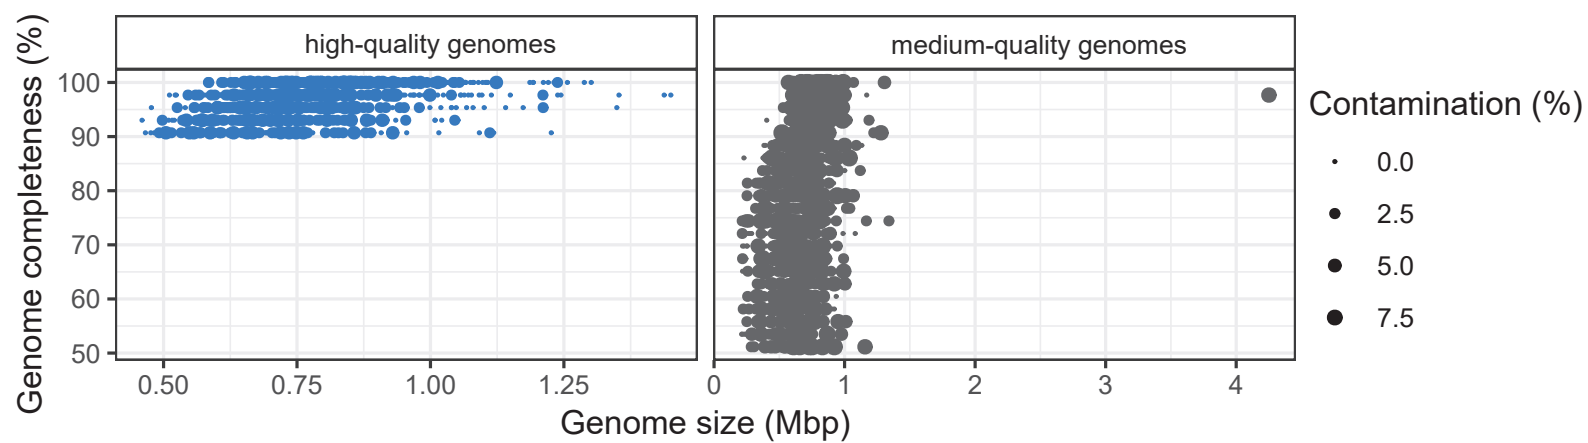

**Supplementary Fig. 2 | Overview of the quality of genomes of Saccharibacteria.** High-quality genomes are represented by blue circles, medium-quality genomes are represented by gray circles, and the size of the circles represents the degree of genome contamination (%).

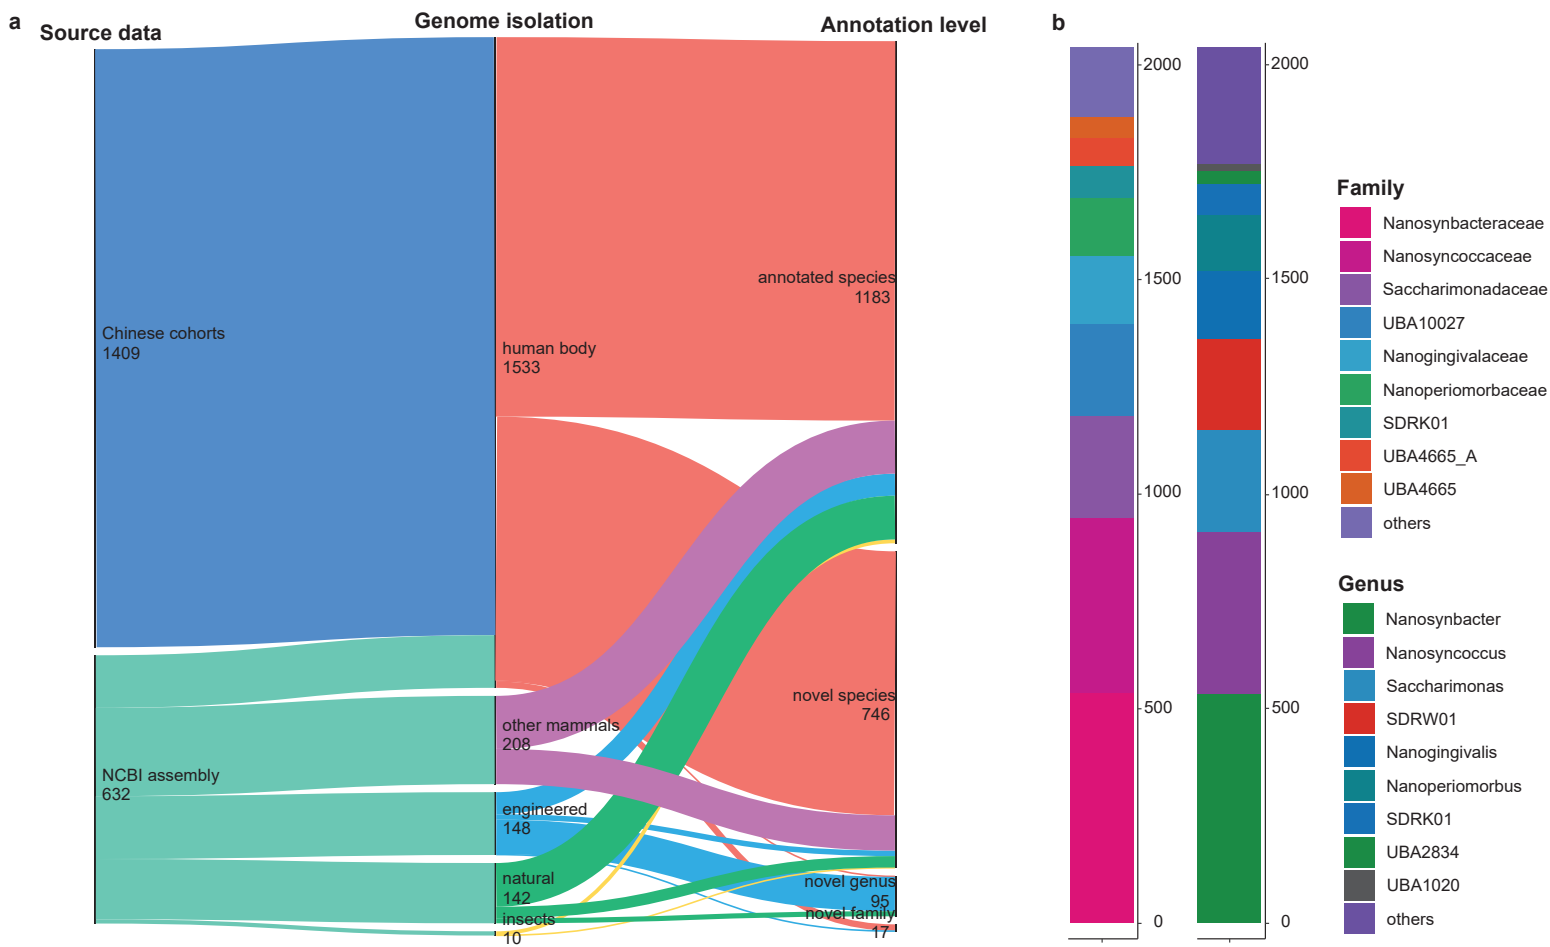

**Supplementary Fig. 3 | Information of Saccharibacteria genomes collected from multiple source data. a** Distribution of source data, isolation and taxonomic annotation for 2,041 high-quality genomes of Saccharibacteria. **b** Taxonomic composition of 2,041 genomes of Saccharibacteria at family level and genus level.

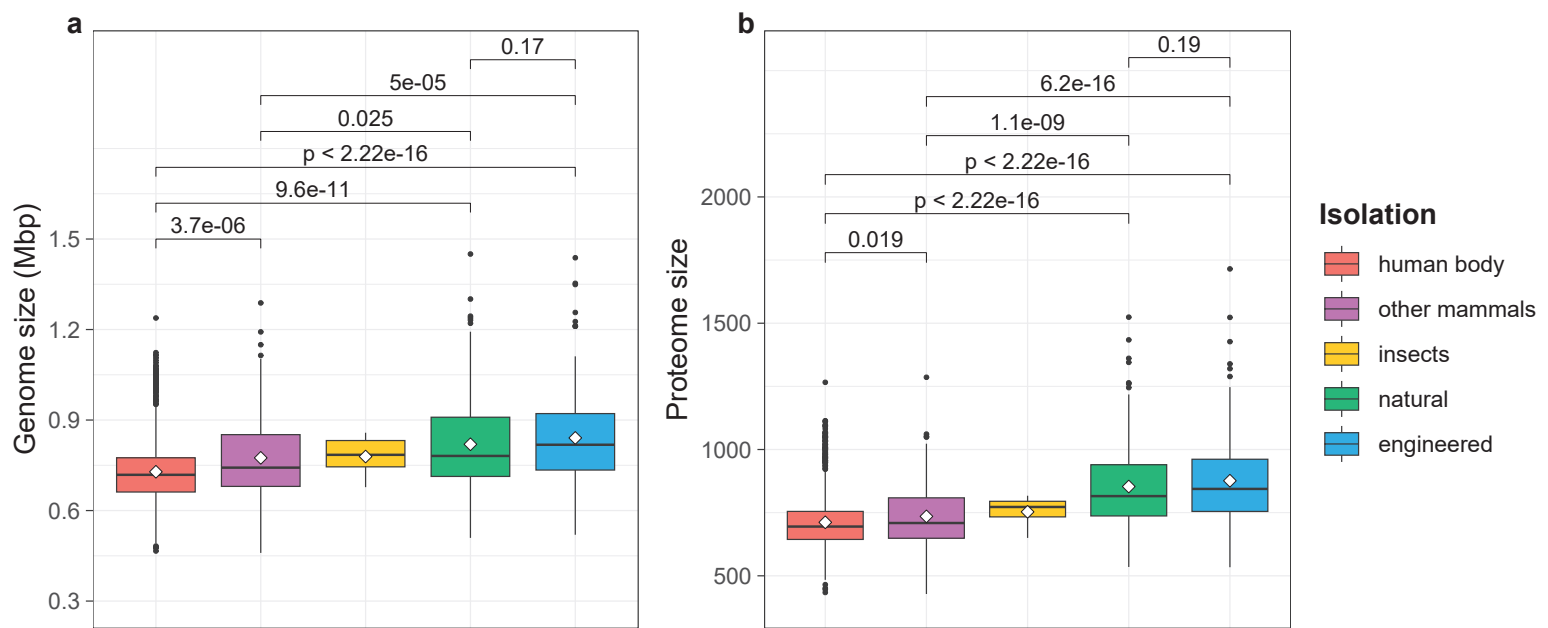

**Supplementary Fig. 4 | Genome size and proteome size of Saccharibacteria.** Box plots for genome size (a) and proteome size (b) of Saccharibacteria, colored by genome isolation. The central line indicates the median. The lower and upper hinges indicate the first and third quartiles. The lower and upper whiskers extend from the hinge to the smallest and largest values no further than 1.5x the interquartile range from the hinge. *P* values are from Wilcoxon rank-sum test (two-sided).

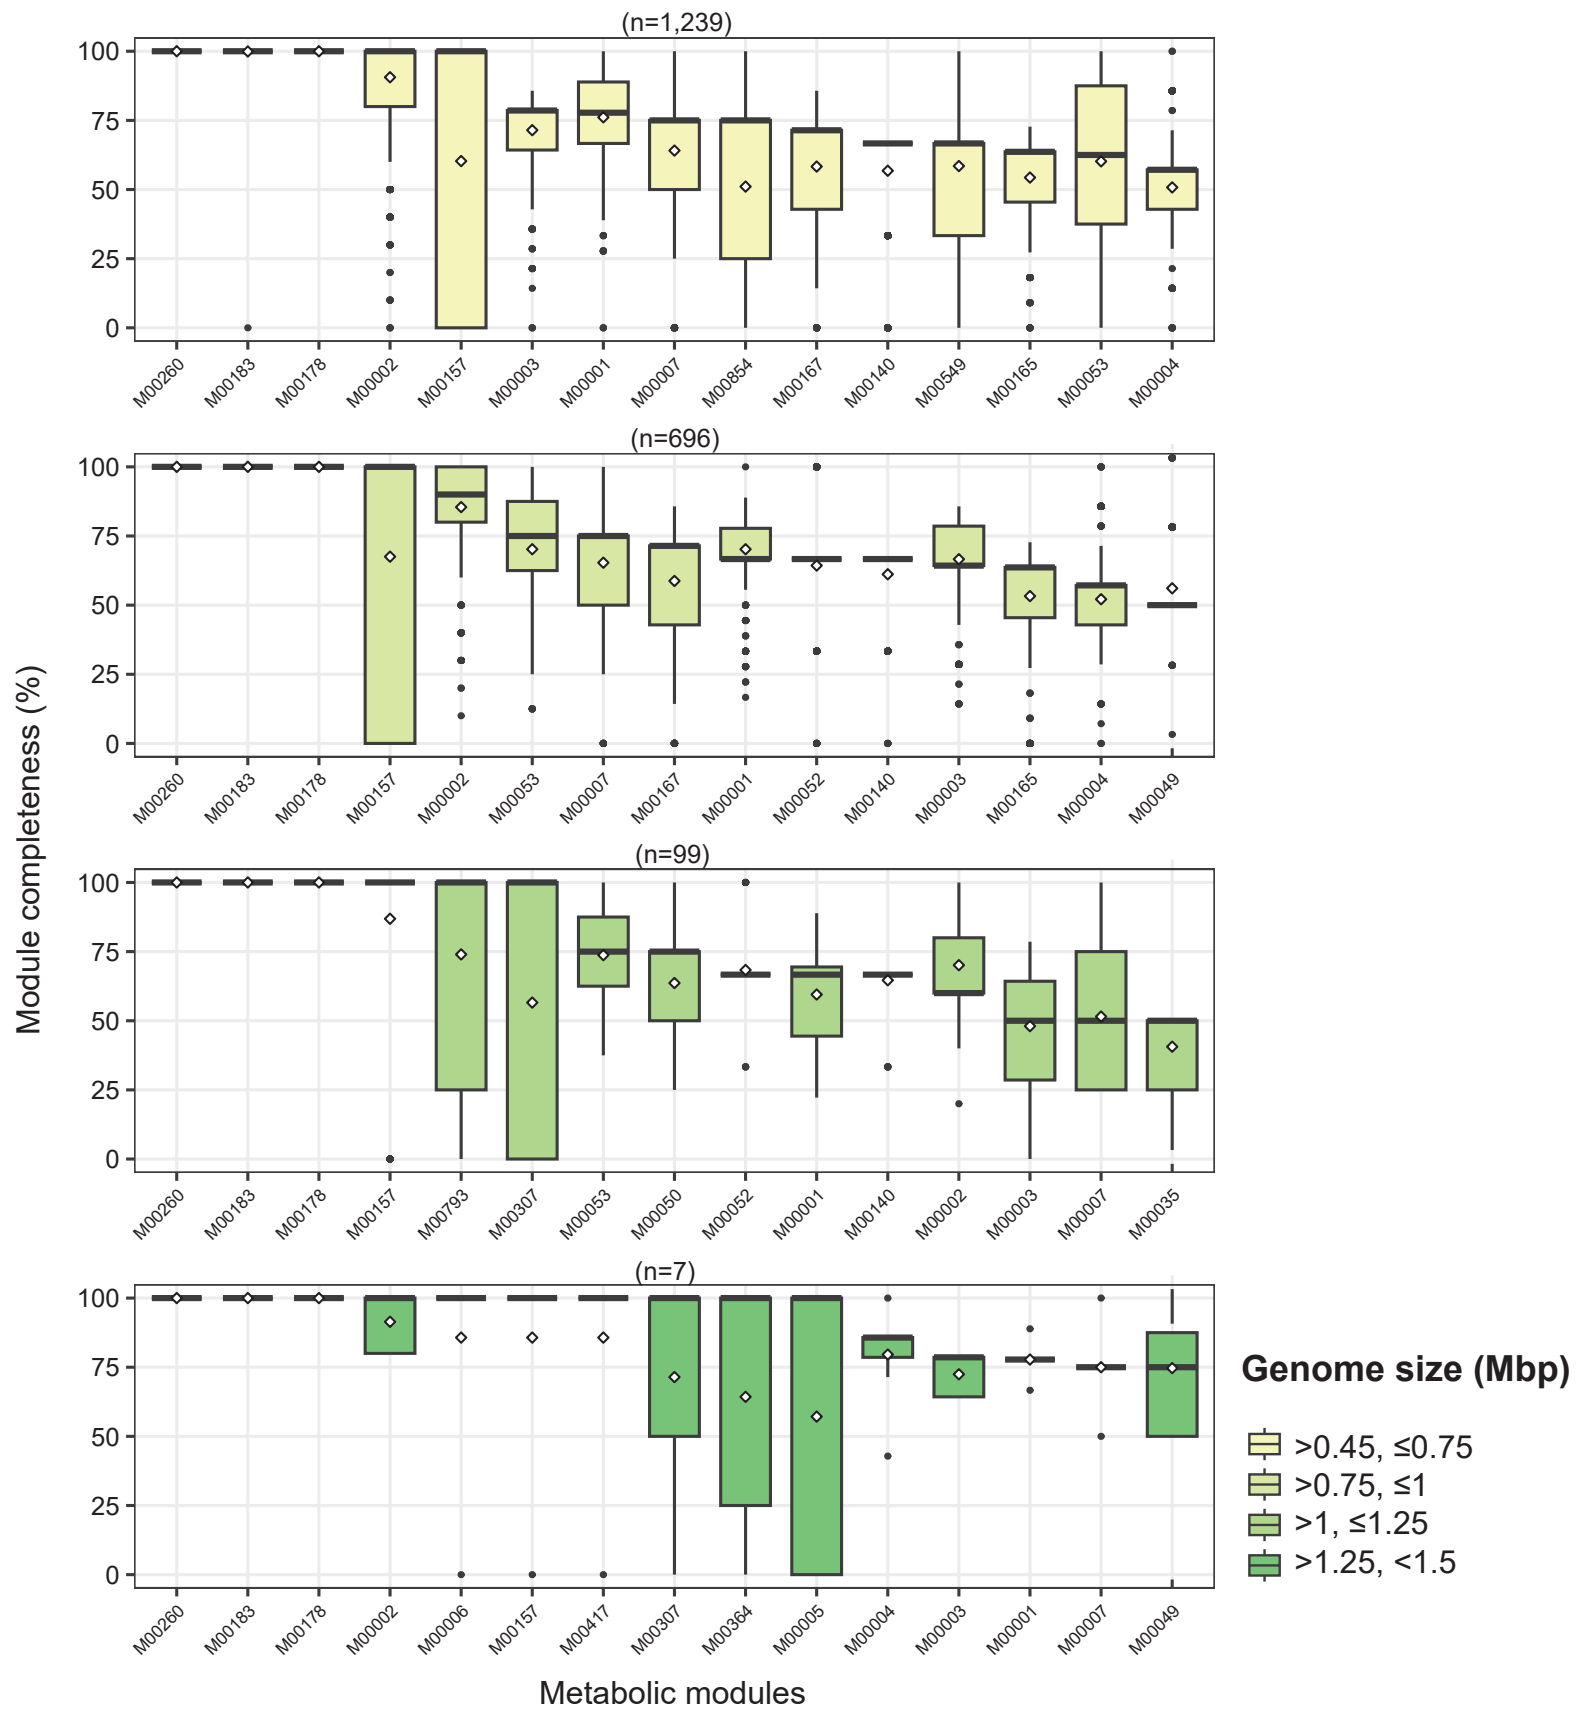

**Supplementary Fig. 5 | Completeness of metabolic modules in genomes of Saccharibacteria.** Boxplot representing the completeness of representative metabolic modules in genomes of Saccharibacteria. The bold central lines indicate the median, white dots indicate the mean. Boxes are sorted by the median, n values refer to the number of genomes, colored by size of genomes.

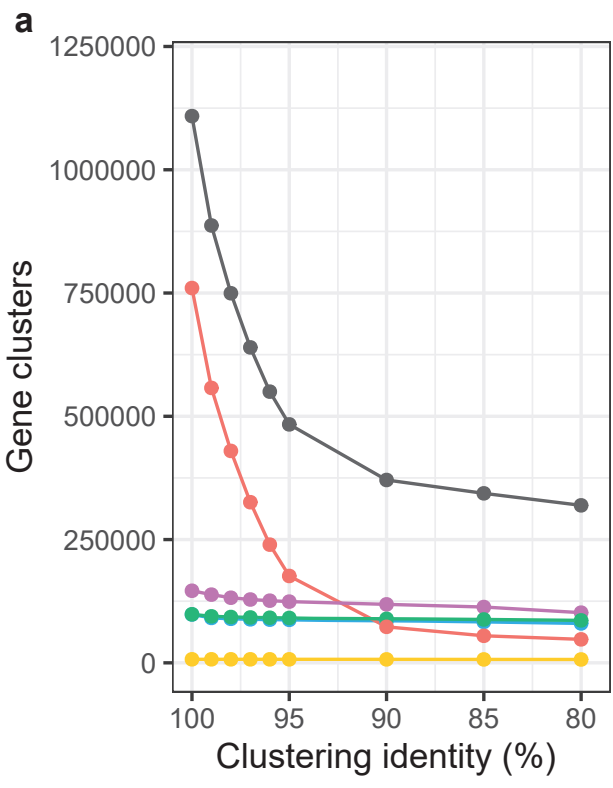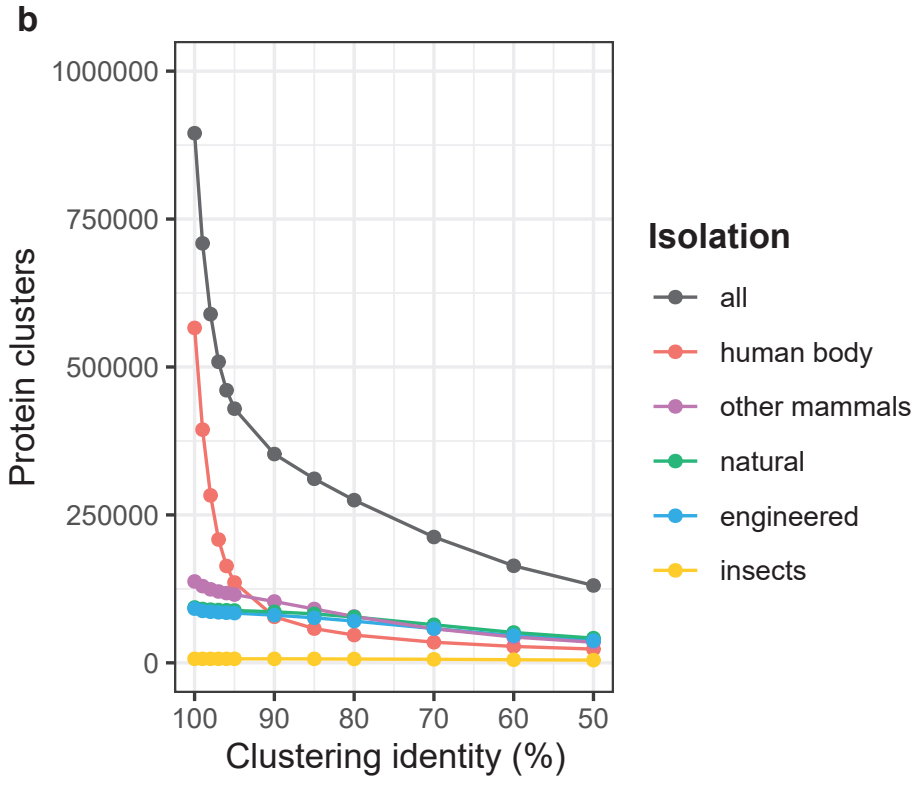

**Supplementary Fig. 6 | Gene catalogue and protein catalogue of Saccharibacteria.** Line plots representing the number of unique gene clusters (a) and protein clusters (b) clustering at different percent identities, colored by genome isolation of Saccharibacteria.

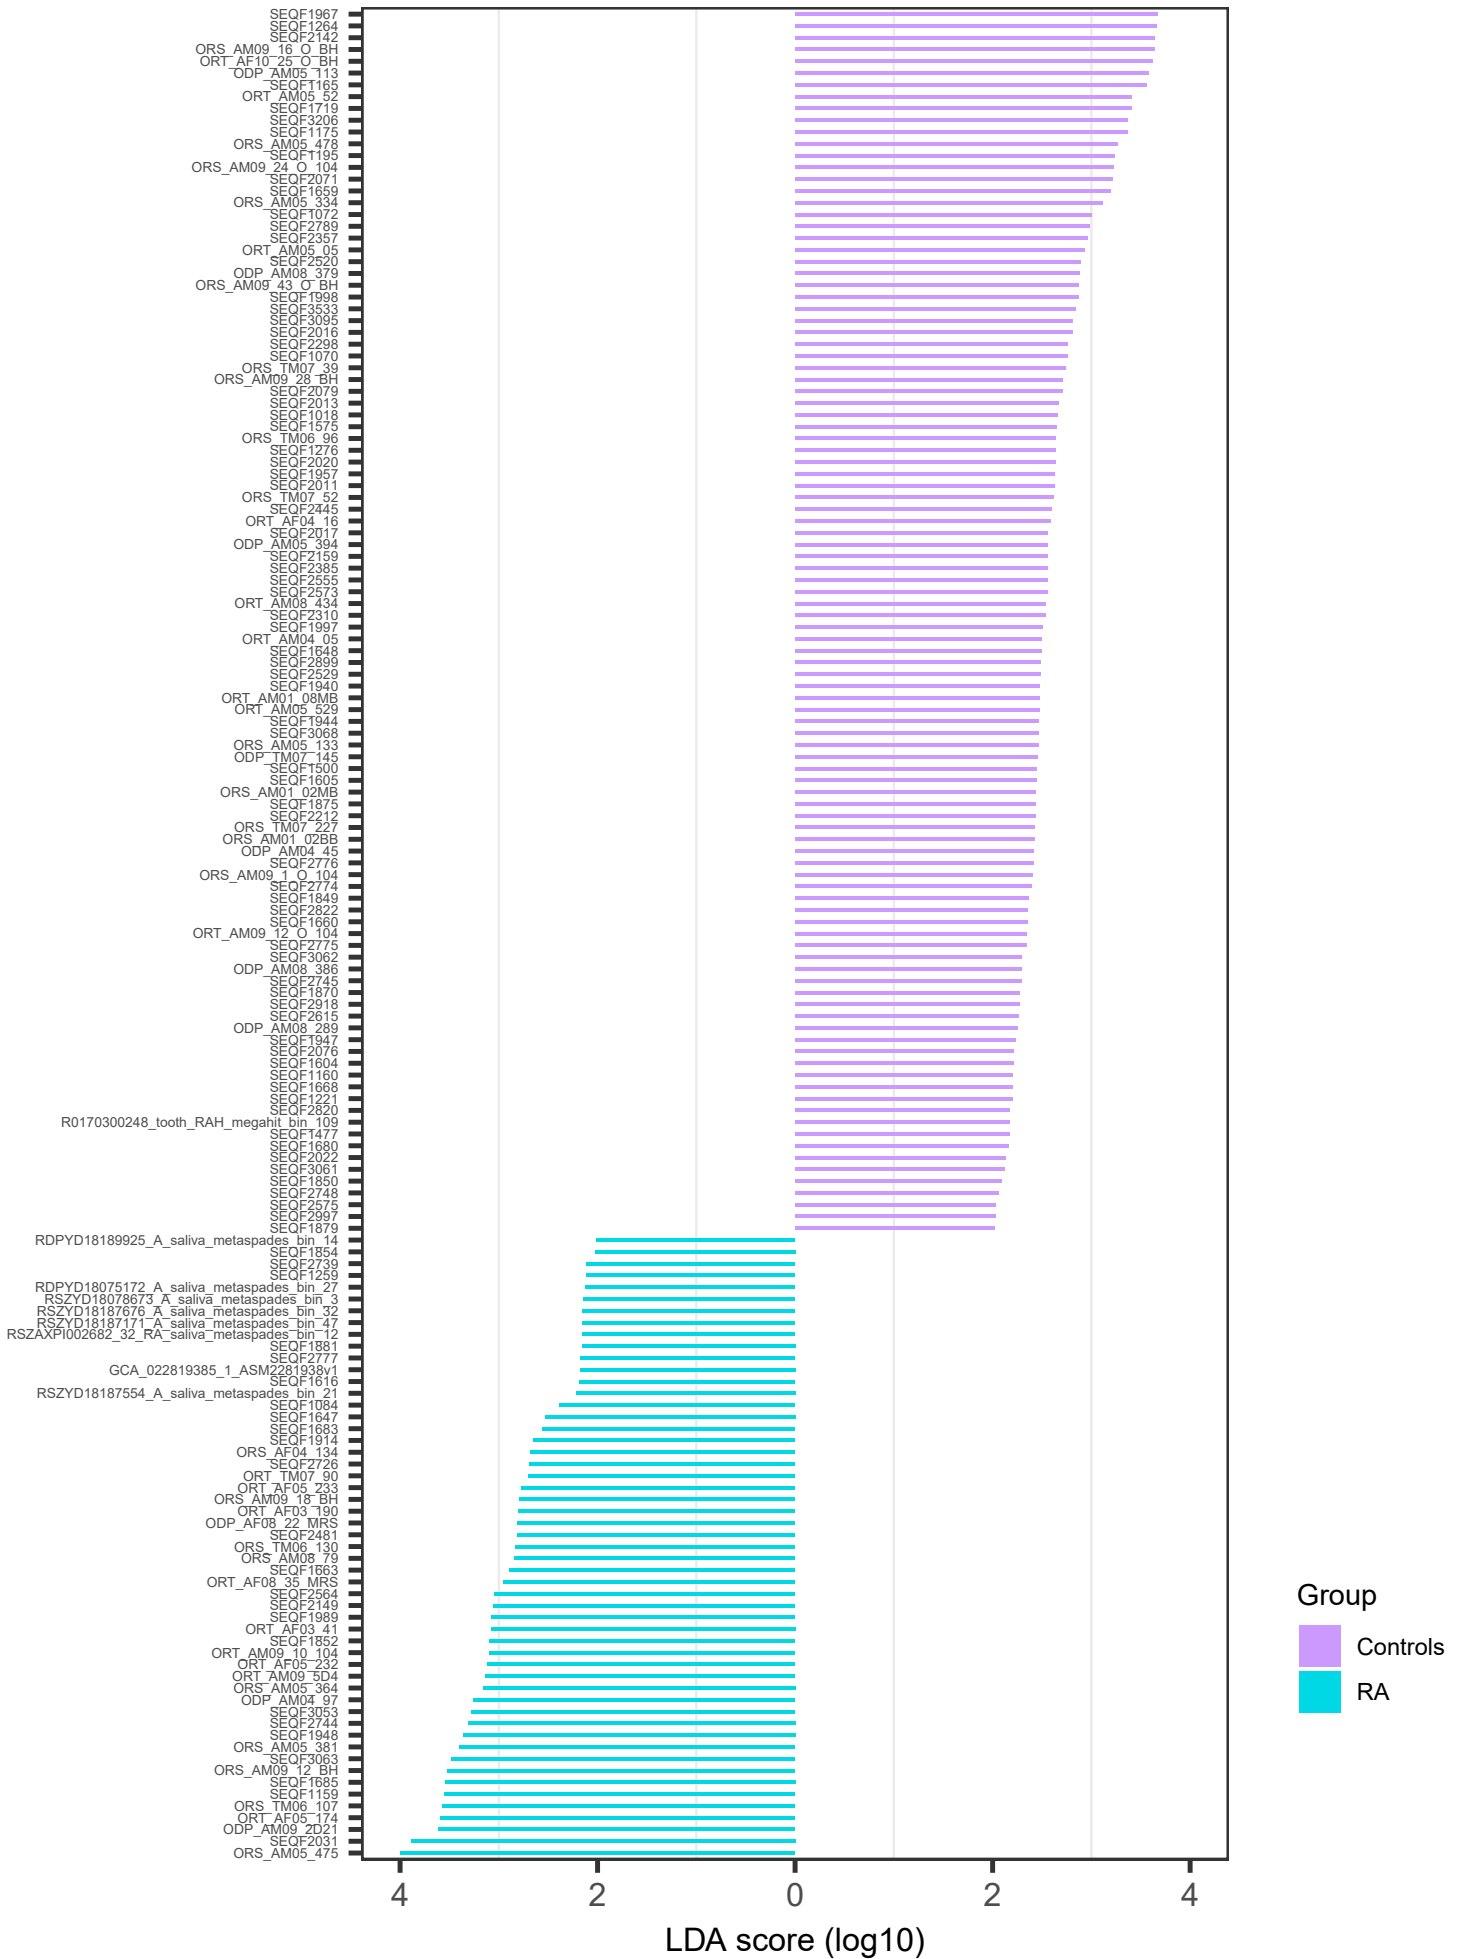

**Supplementary Fig. 7 | The LDA scores of differentially abundant bacterial clusters in HC and RA group.** Analyzed by Linear discriminant analysis Effect Size (LEfSe) analysis ( $P < 0.05$ , LDA > 2), colored according to enrichment group.

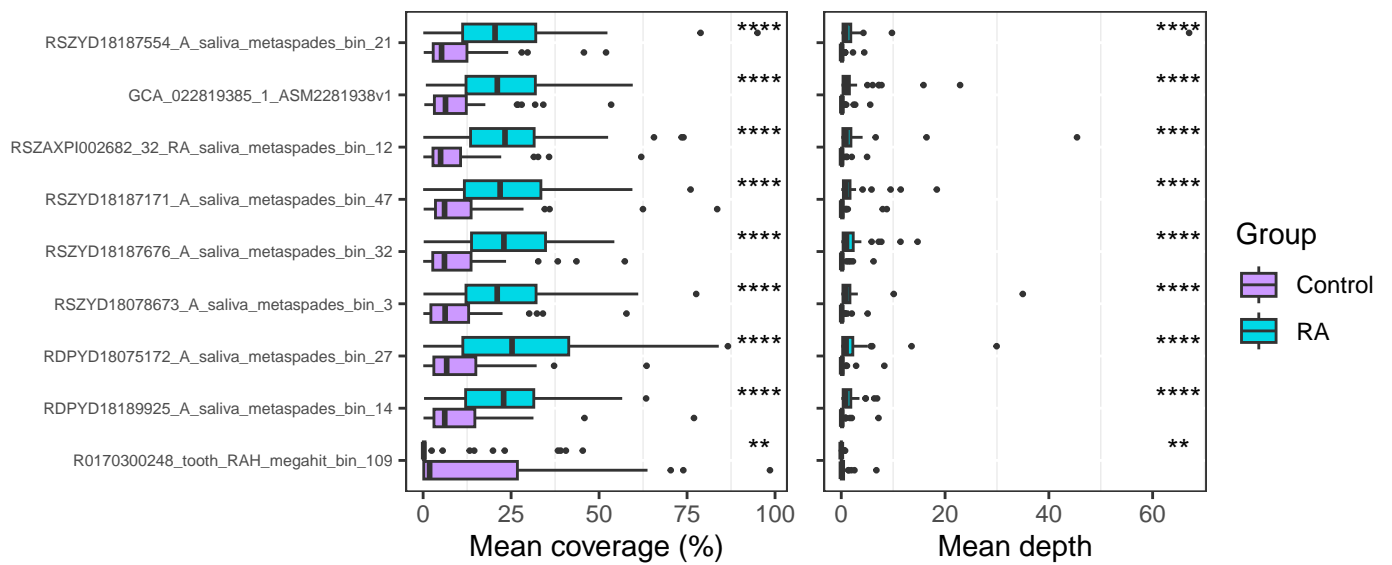

**Supplementary Fig. 8 | Comparison of mean coverage (%) and mean depth of differentially abundant Saccharibacterial clusters in HC and RA.** Colored according to enrichment group. *P* values are from Wilcoxon rank-sum test (two-sided) and adjusted using the Benjamini–Hochberg procedure, \*\*\*\**P*<0.0001, \*\**P*<0.01.



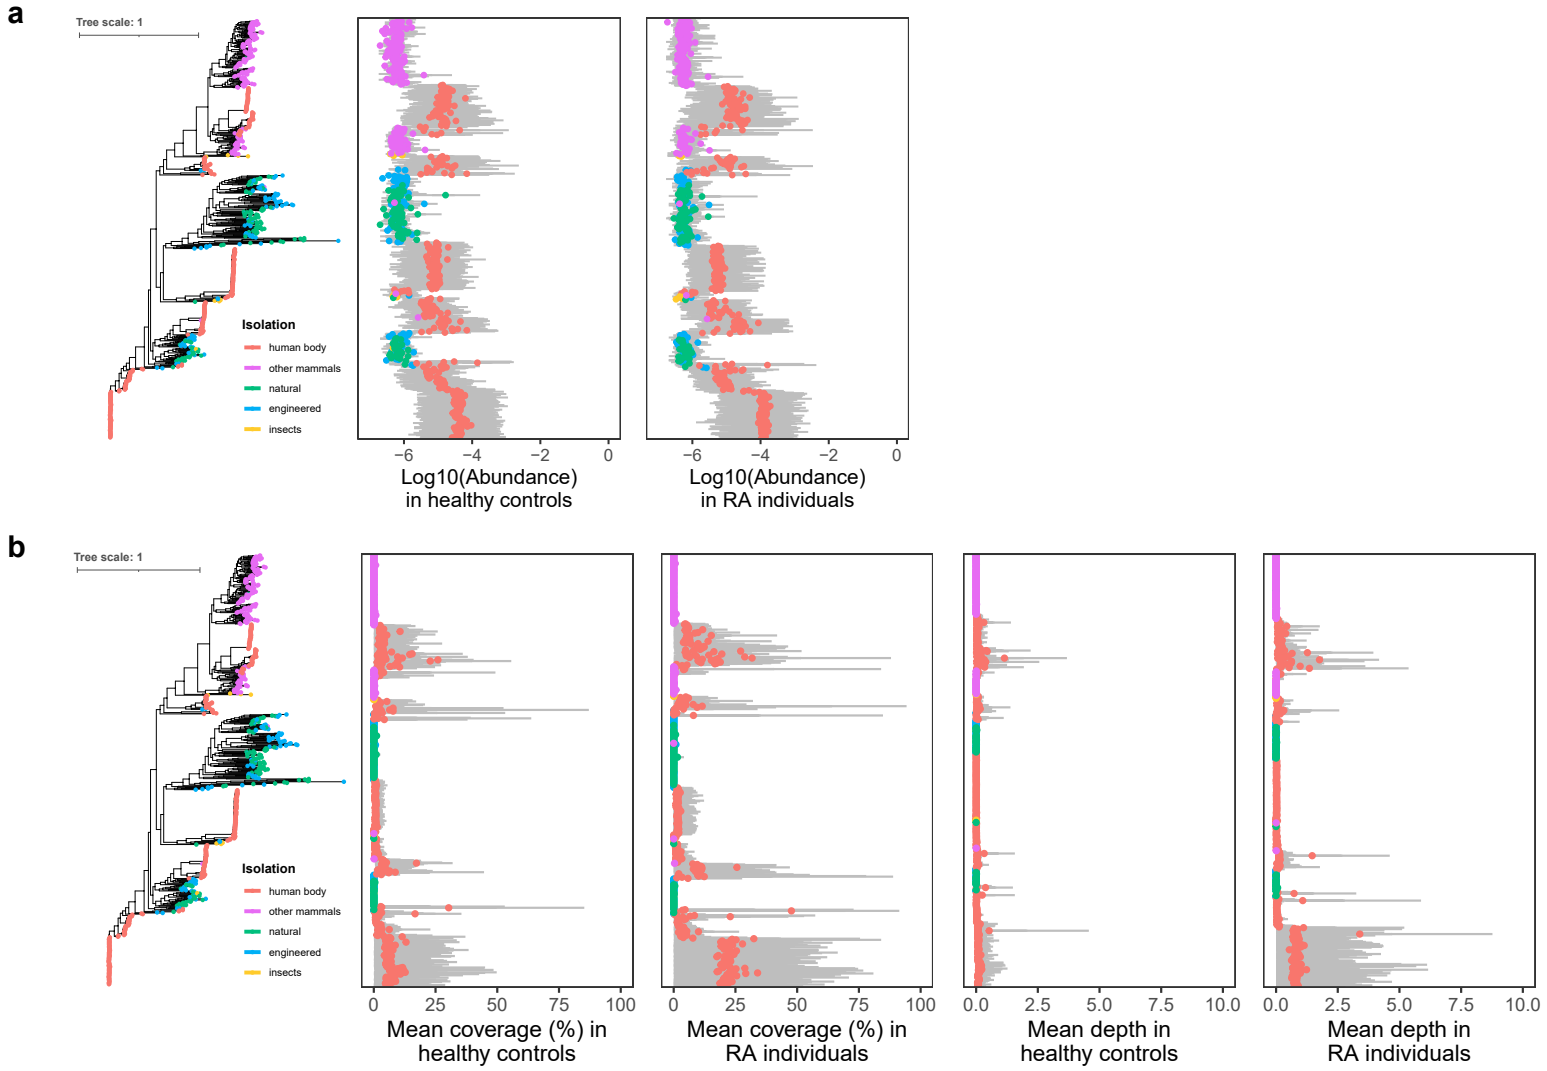

**Supplementary Fig. 9 | Metagenomic analysis of Saccharibacterial in HC and RA. a** Relative abundance of Saccharibacterial clusters in HC and RA. Dot, median of log10 (relative abundance); Bar, prevalence; Color, isolation of clusters. **b** Mean coverage (%) and mean depth of Saccharibacterial clusters in HC and RA. Dot represents the median. Color indicates isolation of clusters.

# Supplementary Table 1. Detailed information of the 2,041 high-quality genomes of Saccharibacteria.

| GenomeID                                 | Accession number | Completeness | Contamination | G+C%  | Coding density | pass.GUNC | Genome size | Gene number | Protein number | Contigs | Source data   | Genome type | Isolation source | Human body niche |
|------------------------------------------|------------------|--------------|---------------|-------|----------------|-----------|-------------|-------------|----------------|---------|---------------|-------------|------------------|------------------|
| GCA_024330325.1_ASM2433032v1             | CNA0070589       | 95.35        | 0             | 43.65 | 92.68          | TRUE      | 661,434     | 687         | 657            | 165     | NCBI assembly | MAG         | human body       | gut              |
| GCA_900555265.1_UMGS1805                 | CNA0070739       | 95.35        | 0             | 43.16 | 93.13          | TRUE      | 674,133     | 735         | 696            | 5       | NCBI assembly | MAG         | human body       | gut              |
| GCA_900555425.1_UMGS1831                 | CNA0070741       | 93.02        | 0             | 43.43 | 92.53          | TRUE      | 624,962     | 670         | 634            | 60      | NCBI assembly | MAG         | human body       | gut              |
| GCA_900555675.1_UMGS1848                 | CNA0070742       | 95.35        | 0             | 43.49 | 92.60          | TRUE      | 664,737     | 727         | 688            | 40      | NCBI assembly | MAG         | human body       | gut              |
| GCA_900556885.1_UMGS1986                 | CNA0070744       | 95.35        | 2.33          | 43.64 | 92.34          | TRUE      | 635,891     | 669         | 644            | 30      | NCBI assembly | MAG         | human body       | gut              |
| GCA_900757685.1_ERS537356_50             | CNA0070745       | 100          | 0             | 43.03 | 91.33          | TRUE      | 729,391     | 791         | 745            | 7       | NCBI assembly | MAG         | human body       | gut              |
| GCA_902461855.1_UHGG-TPA_MGYG-HGUT-00376 | CNA0070747       | 95.35        | 0             | 44.90 | 91.37          | TRUE      | 685,078     | 689         | 647            | 41      | NCBI assembly | MAG         | human body       | gut              |
| GCA_904425485.1_PRJEB35131-2             | CNA0070778       | 97.67        | 0             | 43.70 | 90.50          | TRUE      | 735,796     | 821         | 778            | 197     | NCBI assembly | MAG         | human body       | gut              |
| GCA_918593335.1_timonensis               | CNA0070813       | 97.67        | 0             | 43.70 | 90.50          | TRUE      | 735,796     | 821         | 778            | 197     | NCBI assembly | MAG         | human body       | gut              |
| GCA_934717805.1_ERR7745621_bin.22        | CNA0070817       | 95.35        | 0             | 35.43 | 90.33          | TRUE      | 636,415     | 669         | 631            | 31      | NCBI assembly | MAG         | human body       | gut              |
| GCA_934725355.1_ERR7738173_bin.40        | CNA0070819       | 95.35        | 0             | 44.90 | 90.15          | TRUE      | 788,281     | 797         | 747            | 11      | NCBI assembly | MAG         | human body       | gut              |
| GCA_005697055.1_ASM569705v1              | CNA0070096       | 100          | 2.33          | 46.80 | 90.03          | TRUE      | 842,202     | 885         | 837            | 1       | NCBI assembly | Isolate     | human body       | oral cavity      |
| GCA_005697215.1_ASM569721v1              | CNA0070098       | 100          | 0             | 50.58 | 91.82          | TRUE      | 889,964     | 961         | 913            | 1       | NCBI assembly | Isolate     | human body       | oral cavity      |
| GCA_005697395.1_ASM569739v1              | CNA0070101       | 100          | 0             | 44.45 | 92.55          | TRUE      | 705,178     | 763         | 717            | 1       | NCBI assembly | Isolate     | human body       | oral cavity      |
| GCA_005697565.1_ASM569756v1              | CNA0070103       | 100          | 0             | 47.96 | 92.74          | TRUE      | 782,344     | 823         | 776            | 1       | NCBI assembly | Isolate     | human body       | oral cavity      |
| GCA_010201925.1_ASM1020192v1             | CNA0070158       | 100          | 4.65          | 46.76 | 90.14          | TRUE      | 885,960     | 950         | 900            | 1       | NCBI assembly | Isolate     | human body       | oral cavity      |
| GCA_010202115.1_ASM1020211v1             | CNA0070161       | 100          | 0             | 50.78 | 90.95          | TRUE      | 931,438     | 1028        | 981            | 1       | NCBI assembly | Isolate     | human body       | oral cavity      |
| GCA_010202265.1_ASM1020226v1             | CNA0070163       | 100          | 2.33          | 46.73 | 89.04          | TRUE      | 873,056     | 932         | 885            | 1       | NCBI assembly | Isolate     | human body       | oral cavity      |
| GCA_010202465.1_ASM1020246v1             | CNA0070165       | 97.67        | 0             | 50.94 | 91.16          | TRUE      | 831,234     | 925         | 879            | 1       | NCBI assembly | Isolate     | human body       | oral cavity      |
| GCA_010202645.1_ASM1020264v1             | CNA0070167       | 97.67        | 0             | 50.79 | 91.46          | TRUE      | 848,784     | 917         | 870            | 1       | NCBI assembly | Isolate     | human body       | oral cavity      |
| GCA_010202845.1_ASM1020284v1             | CNA0070170       | 100          | 0             | 50.74 | 92.11          | TRUE      | 853,179     | 904         | 858            | 1       | NCBI assembly | Isolate     | human body       | oral cavity      |
| GCA_013098515.1_ASM1309851v1             | CNA0070174       | 100          | 0             | 50.76 | 91.40          | TRUE      | 839,600     | 909         | 863            | 1       | NCBI assembly | Isolate     | human body       | oral cavity      |
| GCA_013098655.1_ASM1309865v1             | CNA0070177       | 100          | 2.33          | 46.80 | 89.88          | TRUE      | 841,891     | 886         | 838            | 1       | NCBI assembly | Isolate     | human body       | oral cavity      |
| GCA_013098855.1_ASM1309885v1             | CNA0070179       | 100          | 2.33          | 46.80 | 89.98          | TRUE      | 835,009     | 878         | 833            | 1       | NCBI assembly | Isolate     | human body       | oral cavity      |
| GCA_013099015.1_ASM1309901v1             | CNA0070181       | 100          | 0             | 50.74 | 91.71          | TRUE      | 877,855     | 938         | 892            | 1       | NCBI assembly | Isolate     | human body       | oral cavity      |
| GCA_013099195.1_ASM1309919v1             | CNA0070183       | 100          | 0             | 50.66 | 91.35          | TRUE      | 856,991     | 926         | 879            | 1       | NCBI assembly | Isolate     | human body       | oral cavity      |
| GCA_013100805.1_ASM1310080v1             | CNA0070185       | 100          | 0             | 50.67 | 91.94          | TRUE      | 858,111     | 914         | 868            | 1       | NCBI assembly | Isolate     | human body       | oral cavity      |
| GCA_013100825.1_ASM1310082v1             | CNA0070188       | 100          | 0             | 50.43 | 91.33          | TRUE      | 893,660     | 982         | 936            | 1       | NCBI assembly | Isolate     | human body       | oral cavity      |
| GCA_013100845.1_ASM1310084v1             | CNA0070190       | 100          | 0             | 50.81 | 91.72          | TRUE      | 847,999     | 911         | 864            | 1       | NCBI assembly | Isolate     | human body       | oral cavity      |
| GCA_013394755.1_ASM1339475v1             | CNA0070252       | 100          | 0             | 50.81 | 91.71          | TRUE      | 847,999     | 911         | 864            | 1       | NCBI assembly | Isolate     | human body       | oral cavity      |
| GCA_018127705.1_ASM1812770v1             | CNA0070542       | 100          | 2.33          | 46.79 | 84.90          | TRUE      | 1,021,750   | 1059        | 1010           | 1       | NCBI assembly | Isolate     | human body       | oral cavity      |
| GCA_021222645.1_ASM2122264v1             | CNA0070562       | 100          | 0             | 42.87 | 91.89          | TRUE      | 677,938     | 728         | 684            | 1       | NCBI assembly | Isolate     | human body       | oral cavity      |
| GCA_022819345.1_ASM2281934v1             | CNA0070566       | 100          | 0             | 43.24 | 91.73          | TRUE      | 718,383     | 773         | 727            | 1       | NCBI assembly | Isolate     | human body       | oral cavity      |
| GCA_022819365.1_ASM2281936v1             | CNA0070568       | 100          | 0             | 43.30 | 92.10          | TRUE      | 733,310     | 778         | 733            | 1       | NCBI assembly | Isolate     | human body       | oral cavity      |
| GCA_022819385.1_ASM2281938v1             | CNA0070569       | 100          | 0             | 43.26 | 91.80          | TRUE      | 771,907     | 837         | 792            | 1       | NCBI assembly | Isolate     | human body       | oral cavity      |
| GCA_022828245.1_ASM2282824v1             | CNA0070571       | 100          | 0             | 43.18 | 91.89          | TRUE      | 725,580     | 777         | 732            | 2       | NCBI assembly | Isolate     | human body       | oral cavity      |
| GCA_022828255.1_ASM2282825v1             | CNA0070572       | 100          | 0             | 43.16 | 91.77          | TRUE      | 730,938     | 786         | 741            | 2       | NCBI assembly | Isolate     | human body       | oral cavity      |
| GCA_022828285.1_ASM2282828v1             | CNA0070574       | 100          | 0             | 43.24 | 91.74          | TRUE      | 718,486     | 774         | 728            | 3       | NCBI assembly | Isolate     | human body       | oral cavity      |
| GCA_022828295.1_ASM2282829v1             | CNA0070575       | 100          | 0             | 43.25 | 91.69          | TRUE      | 758,480     | 840         | 794            | 6       | NCBI assembly | Isolate     | human body       | oral cavity      |
| GCA_022828325.1_ASM2282832v1             | CNA0070577       | 100          | 0             | 43.22 | 91.84          | TRUE      | 756,098     | 823         | 778            | 4       | NCBI assembly | Isolate     | human body       | oral cavity      |
| GCA_022828365.1_ASM2282836v1             | CNA0070579       | 100          | 0             | 43.39 | 92.19          | TRUE      | 741,912     | 806         | 759            | 3       | NCBI assembly | Isolate     | human body       | oral cavity      |
| GCA_022828375.1_ASM2282837v1             | CNA0070580       | 100          | 0             | 43.20 | 92.06          | TRUE      | 755,984     | 807         | 762            | 2       | NCBI assembly | Isolate     | human body       | oral cavity      |
| GCA_000803625.1_ASM80362v1               | CNA0069829       | 100          | 0             | 44.45 | 92.56          | TRUE      | 705,138     | 757         | 711            | 1       | NCBI assembly | MAG         | human body       | oral cavity      |
| GCA_004138385.1_ASM413838v1              | CNA0070081       | 93.02        | 2.33          | 48.08 | 92.63          | TRUE      | 756,930     | 789         | 751            | 72      | NCBI assembly | MAG         | human body       | oral cavity      |
| GCA_004138445.1_ASM413844v1              | CNA0070086       | 97.67        | 0             | 50.45 | 90.05          | TRUE      | 730,081     | 708         | 661            | 24      | NCBI assembly | MAG         | human body       | oral cavity      |
| GCA_004138455.1_ASM413845v1              | CNA0070088       | 100          | 0             | 50.80 | 90.39          | TRUE      | 740,889     | 703         | 659            | 35      | NCBI assembly | MAG         | human body       | oral cavity      |
| GCA_004151455.1_ASM415145v1              | CNA0070091       | 100          | 0             | 32.34 | 90.23          | TRUE      | 625,762     | 637         | 596            | 17      | NCBI assembly | MAG         | human body       | oral cavity      |
| GCA_007845265.1_ASM784526v1              | CNA0070115       | 97.67        | 0             | 43.34 | 91.35          | TRUE      | 703,325     | 745         | 703            | 28      | NCBI assembly | MAG         | human body       | oral cavity      |
| GCA_007845325.1_ASM784532v1              | CNA0070118       | 95.35        | 0             | 43.35 | 90.38          | TRUE      | 640,268     | 686         | 645            | 46      | NCBI assembly | MAG         | human body       | oral cavity      |
| GCA_007845355.1_ASM784535v1              | CNA0070120       | 90.7         | 0             | 43.26 | 90.77          | TRUE      | 635,951     | 683         | 637            | 38      | NCBI assembly | MAG         | human body       | oral cavity      |
| GCA_007845485.1_ASM784548v1              | CNA0070123       | 97.67        | 0             | 39.56 | 90.33          | TRUE      | 890,301     | 917         | 867            | 22      | NCBI assembly | MAG         | human body       | oral cavity      |
| GCA_013332955.2_ASM1333295v2             | CNA0070203       | 93.02        | 0             | 41.09 | 89.38          | TRUE      | 725,630     | 708         | 669            | 53      | NCBI assembly | MAG         | human body       | oral cavity      |
| GCA_013333055.2_ASM1333305v2             | CNA0070207       | 100          | 0             | 37.77 | 91.03          | TRUE      | 762,856     | 781         | 740            | 14      | NCBI assembly | MAG         | human body       | oral cavity      |
| GCA_013333135.2_ASM1333313v2             | CNA0070210       | 97.67        | 2.33          | 40.90 | 89.47          | TRUE      | 738,377     | 735         | 691            | 35      | NCBI assembly | MAG         | human body       | oral cavity      |
| GCA_013333155.2_ASM1333315v2             | CNA0070213       | 97.67        | 0             | 41.28 | 89.60          | TRUE      | 826,344     | 789         | 748            | 37      | NCBI assembly | MAG         | human body       | oral cavity      |
| GCA_013333205.2_ASM1333320v2             | CNA0070216       | 95.35        | 2.33          | 41.35 | 89.63          | TRUE      | 737,067     | 707         | 666            | 72      | NCBI assembly | MAG         | human body       | oral cavity      |
| GCA_013333375.2_ASM1333337v2             | CNA0070220       | 95.35        | 2.33          | 41.20 | 89.39          | TRUE      | 635,716     | 622         | 585            | 53      | NCBI assembly | MAG         | human body       | oral cavity      |
| GCA_013333415.2_ASM1333341v2             | CNA0070223       | 95.35        | 2.33          | 41.32 | 89.63          | TRUE      | 778,783     | 756         | 711            | 31      | NCBI assembly | MAG         | human body       | oral cavity      |
| GCA_013333485.2_ASM1333348v2             | CNA0070225       | 100          | 4.65          | 46.78 | 90.98          | TRUE      | 783,709     | 824         | 789            | 21      | NCBI assembly | MAG         | human body       | oral cavity      |
| GCA_013333495.2_ASM1333349v2             | CNA0070229       | 100          | 2.33          | 48.56 | 88.92          | TRUE      | 712,298     | 727         | 691            | 17      | NCBI assembly | MAG         | human body       | oral cavity      |
| GCA_013333515.2_ASM1333351v2             | CNA0070232       | 100          | 0             | 50.54 | 89.78          | TRUE      | 808,514     | 767         | 721            | 53      | NCBI assembly | MAG         | human body       | oral cavity      |
| GCA_013333575.2_ASM1333357v2             | CNA0070234       | 95.35        | 0             | 38.47 | 91.50          | TRUE      | 733,643     | 758         | 723            | 47      | NCBI assembly | MAG         | human body       | oral cavity      |
| GCA_013333595.2_ASM1333359v2             | CNA0070237       | 95.35        | 0             | 54.07 | 90.08          | TRUE      | 810,727     | 855         | 810            | 30      | NCBI assembly | MAG         | human body       | oral cavity      |
| GCA_013333625.2_ASM1333362v2             | CNA0070240       | 97.67        | 0             | 48.07 | 91.80          | TRUE      | 829,076     | 877         | 832            | 45      | NCBI assembly | MAG         | human body       | oral cavity      |
| GCA_013333645.2_ASM1333364v2             | CNA0070242       | 97.67        | 0             | 52.05 | 85.78          | TRUE      | 992,849     | 999         | 953            | 26      | NCBI assembly | MAG         | human body       | oral cavity      |
| GCA_013333675.2_ASM1333367v2             | CNA0070244       | 100          | 2.33          | 48.90 | 90.00          | TRUE      | 854,011     | 882         | 841            | 42      | NCBI assembly | MAG         | human body       | oral cavity      |
| GCA_013333815.2_ASM1333381v2             | CNA0070247       | 100          | 0             | 38.39 | 90.92          | TRUE      | 784,149     | 829         | 789            | 20      | NCBI assembly | MAG         | human body       | oral cavity      |
| GCA_015257445.1_ASM1525744v1             | CNA0070273       | 95.35        | 0             | 41.04 | 89.75          | TRUE      | 714,681     | 675         | 637            | 185     | NCBI assembly | MAG         | human body       | oral cavity      |
| GCA_015257485.1_ASM1525748v1             | CNA0070275       | 97.67        | 0             | 41.36 | 88.99          | TRUE      | 667,180     | 646         | 606            | 32      | NCBI assembly | MAG         | human body       | oral cavity      |
| GCA_015257495.1_ASM1525749v1             | CNA0070277       | 100          | 0             | 43.29 | 90.80          | TRUE      | 727,057     | 784         | 736            | 17      | NCBI assembly | MAG         | human body       | oral cavity      |
| GCA_015257505.1_ASM1525750v1             | CNA0070279       | 95.35        | 0             | 41.29 | 89.17          | TRUE      | 776,077     | 762         | 711            | 28      | NCBI assembly | MAG         | human body       | oral cavity      |
| GCA_015257555.2_ASM1525755v2             | CNA0070281       | 100          | 0             | 38.21 | 90.49          | TRUE      | 841,302     | 849         | 804            | 1       | NCBI assembly | MAG         | human body       | oral cavity      |

|                                                     |            |       |      |       |       |      |           |      |      |     |                 |     |            |             |
|-----------------------------------------------------|------------|-------|------|-------|-------|------|-----------|------|------|-----|-----------------|-----|------------|-------------|
| GCA_015257575.1_ASM1525757v1                        | CNA0070284 | 97.67 | 0    | 37.58 | 90.66 | TRUE | 720,911   | 742  | 704  | 38  | NCBI assembly   | MAG | human body | oral cavity |
| GCA_015257665.1_ASM1525766v1                        | CNA0070286 | 97.67 | 0    | 51.54 | 85.53 | TRUE | 1,040,784 | 1092 | 1051 | 32  | NCBI assembly   | MAG | human body | oral cavity |
| GCA_015257705.1_ASM1525770v1                        | CNA0070288 | 93.02 | 0    | 43.26 | 89.56 | TRUE | 818,123   | 870  | 810  | 163 | NCBI assembly   | MAG | human body | oral cavity |
| GCA_015257785.3_ASM1525778v3                        | CNA0070290 | 100   | 0    | 36.44 | 89.76 | TRUE | 691,584   | 732  | 686  | 1   | NCBI assembly   | MAG | human body | oral cavity |
| GCA_015257795.3_ASM1525779v3                        | CNA0070292 | 100   | 0    | 36.41 | 89.72 | TRUE | 663,355   | 689  | 643  | 1   | NCBI assembly   | MAG | human body | oral cavity |
| GCA_015257815.1_ASM1525781v1                        | CNA0070294 | 97.67 | 2.33 | 36.32 | 91.05 | TRUE | 640,359   | 668  | 629  | 51  | NCBI assembly   | MAG | human body | oral cavity |
| GCA_016112465.1_ASM1611246v1                        | CNA0070311 | 97.67 | 0    | 41.39 | 85.67 | TRUE | 718,376   | 703  | 659  | 74  | NCBI assembly   | MAG | human body | oral cavity |
| GCA_020912025.1_ASM2091202v1                        | CNA0070560 | 100   | 0    | 43.15 | 90.67 | TRUE | 760,861   | 812  | 766  | 39  | NCBI assembly   | MAG | human body | oral cavity |
| GCA_905365145.1_ERZ1644999-mag-bin.1                | CNA0070779 | 97.67 | 2.33 | 47.91 | 91.46 | TRUE | 831,236   | 872  | 824  | 9   | NCBI assembly   | MAG | human body | oral cavity |
| GCA_905365345.1_ERZ1645002-mag-bin.1                | CNA0070780 | 95.35 | 0    | 50.74 | 90.39 | TRUE | 749,127   | 700  | 657  | 68  | NCBI assembly   | MAG | human body | oral cavity |
| GCA_905370345.1_DRR046104-mag-bin.8                 | CNA0070782 | 100   | 0    | 43.26 | 92.13 | TRUE | 688,963   | 736  | 698  | 46  | NCBI assembly   | MAG | human body | oral cavity |
| GCA_905371595.1_SRR9217384-mag-bin.1                | CNA0070783 | 93.02 | 2.33 | 47.77 | 91.61 | TRUE | 825,881   | 852  | 808  | 57  | NCBI assembly   | MAG | human body | oral cavity |
| GCA_905371785.1_SRR9217391-mag-bin.4                | CNA0070785 | 100   | 2.33 | 47.48 | 90.74 | TRUE | 906,179   | 946  | 897  | 9   | NCBI assembly   | MAG | human body | oral cavity |
| GCA_905372095.1_SRR9217394-mag-bin.2                | CNA0070786 | 100   | 2.33 | 48.04 | 91.41 | TRUE | 814,938   | 846  | 799  | 8   | NCBI assembly   | MAG | human body | oral cavity |
| GCA_905372195.1_SRR9217401-mag-bin.1                | CNA0070788 | 100   | 2.33 | 48.26 | 91.25 | TRUE | 812,386   | 839  | 795  | 14  | NCBI assembly   | MAG | human body | oral cavity |
| GCA_905372225.1_SRR9217401-mag-bin.8                | CNA0070789 | 95.35 | 0    | 50.84 | 90.29 | TRUE | 784,600   | 747  | 699  | 30  | NCBI assembly   | MAG | human body | oral cavity |
| GCA_905372305.1_SRR9217408-mag-bin.12               | CNA0070791 | 100   | 0    | 47.49 | 91.17 | TRUE | 927,681   | 1003 | 956  | 5   | NCBI assembly   | MAG | human body | oral cavity |
| GCA_905372385.1_SRR9217408-mag-bin.1                | CNA0070793 | 100   | 4.65 | 48.62 | 90.84 | TRUE | 878,839   | 932  | 890  | 12  | NCBI assembly   | MAG | human body | oral cavity |
| GCA_905372495.1_SRR9217423-mag-bin.7                | CNA0070795 | 100   | 0    | 40.05 | 90.45 | TRUE | 691,421   | 683  | 642  | 43  | NCBI assembly   | MAG | human body | oral cavity |
| GCA_905372725.1_SRR9217423-mag-bin.8                | CNA0070796 | 100   | 0    | 38.25 | 89.90 | TRUE | 888,130   | 905  | 860  | 15  | NCBI assembly   | MAG | human body | oral cavity |
| GCA_905372785.1_SRR9217428-mag-bin.23               | CNA0070798 | 100   | 0    | 48.42 | 88.94 | TRUE | 717,051   | 718  | 683  | 10  | NCBI assembly   | MAG | human body | oral cavity |
| GCA_905372835.1_SRR9217428-mag-bin.30               | CNA0070799 | 100   | 0    | 47.92 | 92.55 | TRUE | 804,454   | 839  | 789  | 6   | NCBI assembly   | MAG | human body | oral cavity |
| GCA_905373275.1_SRR9217462-mag-bin.7                | CNA0070801 | 95.35 | 0    | 51.28 | 90.17 | TRUE | 679,537   | 642  | 599  | 66  | NCBI assembly   | MAG | human body | oral cavity |
| GCA_905373345.1_SRR9217464-mag-bin.7                | CNA0070802 | 93.02 | 4.65 | 48.56 | 90.29 | TRUE | 733,518   | 756  | 717  | 105 | NCBI assembly   | MAG | human body | oral cavity |
| GCA_905373385.1_SRR9217464-mag-bin.2                | CNA0070803 | 97.67 | 0    | 50.48 | 89.49 | TRUE | 827,820   | 792  | 743  | 30  | NCBI assembly   | MAG | human body | oral cavity |
| GCA_905373795.1_SRR9217490-mag-bin.5                | CNA0070805 | 100   | 0    | 47.33 | 91.32 | TRUE | 905,931   | 969  | 922  | 7   | NCBI assembly   | MAG | human body | oral cavity |
| GCA_905373835.1_SRR9217492-mag-bin.7                | CNA0070807 | 100   | 0    | 52.17 | 85.54 | TRUE | 998,904   | 1015 | 965  | 12  | NCBI assembly   | MAG | human body | oral cavity |
| GCA_915070725.1_SRR1045092_bin.5_metaWRAP_v1.1_MAG  | CNA0070808 | 90.7  | 0    | 50.23 | 89.91 | TRUE | 738,156   | 697  | 662  | 76  | NCBI assembly   | MAG | human body | oral cavity |
| GCA_916439725.1_DRR214962_bin.20_metaWRAP_v1.1_MAG  | CNA0070810 | 93.02 | 0    | 43.10 | 89.21 | TRUE | 622,880   | 865  | 827  | 1   | NCBI assembly   | MAG | human body | oral cavity |
| GCA_916720665.1_SRR15235659_bin.7_metaWRAP_v1.1_MAG | CNA0070811 | 100   | 0    | 42.98 | 91.36 | TRUE | 748,618   | 824  | 778  | 8   | NCBI assembly   | MAG | human body | oral cavity |
| GCA_927910745.1_ERR3827327_bin.3_metaWRAP_v1.1_MAG  | CNA0070815 | 97.67 | 0    | 52.30 | 84.49 | TRUE | 1,013,504 | 1111 | 1060 | 29  | NCBI assembly   | MAG | human body | oral cavity |
| GCA_927911635.1_ERR3827207_bin.3_metaWRAP_v1.1_MAG  | CNA0070816 | 97.67 | 0    | 51.78 | 84.44 | TRUE | 968,696   | 1109 | 1066 | 75  | NCBI assembly   | MAG | human body | oral cavity |
| GCA_946893605.1_PRJEB56001                          | CNA0070879 | 100   | 0    | 43.42 | 88.20 | TRUE | 701,908   | 891  | 847  | 1   | NCBI assembly   | MAG | human body | oral cavity |
| GCA_947095985.1_SRR8786266_bin.1_metaWRAP_v1.3_MAG  | CNA0070894 | 90.7  | 2.33 | 44.33 | 92.87 | TRUE | 729,661   | 776  | 745  | 58  | NCBI assembly   | MAG | human body | oral cavity |
| GCA_947097085.1_SRR8786267_bin.10_metaWRAP_v1.3_MAG | CNA0070895 | 90.7  | 0    | 42.52 | 91.12 | TRUE | 715,922   | 728  | 691  | 69  | NCBI assembly   | MAG | human body | oral cavity |
| GCA_947097435.1_SRR8786267_bin.5_metaWRAP_v1.3_MAG  | CNA0070897 | 95.35 | 2.33 | 46.78 | 90.92 | TRUE | 784,719   | 839  | 802  | 18  | NCBI assembly   | MAG | human body | oral cavity |
| GCA_947097585.1_SRR8786264_bin.12_metaWRAP_v1.3_MAG | CNA0070898 | 97.67 | 2.33 | 48.10 | 91.32 | TRUE | 781,521   | 804  | 765  | 54  | NCBI assembly   | MAG | human body | oral cavity |
| GCA_947098845.1_SRR8786267_bin.6_metaWRAP_v1.3_MAG  | CNA0070900 | 90.7  | 2.33 | 48.71 | 89.77 | TRUE | 836,262   | 856  | 813  | 31  | NCBI assembly   | MAG | human body | oral cavity |
| ERR2764804.metaspades.bin.10                        | CNA0069813 | 95.35 | 0    | 35.82 | 90.10 | TRUE | 580,489   | 628  | 598  | 154 | Chinese cohorts | MAG | human body | oral cavity |
| ERR2764806.metaspades.bin.18                        | CNA0069817 | 93.02 | 0    | 43.80 | 92.32 | TRUE | 620,955   | 639  | 605  | 89  | Chinese cohorts | MAG | human body | oral cavity |
| SRR6748116.metaspades.bin.2                         | CNA0071042 | 100   | 0    | 43.24 | 91.29 | TRUE | 725,361   | 782  | 738  | 35  | Chinese cohorts | MAG | human body | oral cavity |
| SRR6748158.metaspades.bin.2                         | CNA0071045 | 100   | 0    | 43.36 | 91.57 | TRUE | 702,899   | 756  | 712  | 83  | Chinese cohorts | MAG | human body | oral cavity |
| SRR6748159.metaspades.bin.19                        | CNA0071048 | 100   | 0    | 43.27 | 91.28 | TRUE | 728,846   | 782  | 736  | 13  | Chinese cohorts | MAG | human body | oral cavity |
| SRR6748160.metaspades.bin.6                         | CNA0071050 | 100   | 2.33 | 43.21 | 91.19 | TRUE | 733,115   | 791  | 744  | 10  | Chinese cohorts | MAG | human body | oral cavity |
| SRR6748161.metaspades.bin.16                        | CNA0071054 | 97.67 | 0    | 43.34 | 92.10 | TRUE | 695,164   | 757  | 716  | 50  | Chinese cohorts | MAG | human body | oral cavity |
| SRR6748162.metaspades.bin.9                         | CNA0071056 | 95.35 | 0    | 43.65 | 91.84 | TRUE | 650,019   | 706  | 667  | 26  | Chinese cohorts | MAG | human body | oral cavity |
| SRR6748163.metaspades.bin.10                        | CNA0071059 | 90.7  | 0    | 43.17 | 91.15 | TRUE | 724,481   | 775  | 729  | 37  | Chinese cohorts | MAG | human body | oral cavity |
| SRR6748164.metaspades.bin.5                         | CNA0071062 | 100   | 4.65 | 43.26 | 91.29 | TRUE | 727,327   | 781  | 738  | 15  | Chinese cohorts | MAG | human body | oral cavity |
| SRR6748184.metaspades.bin.16                        | CNA0071065 | 95.35 | 0    | 43.28 | 91.28 | TRUE | 713,189   | 771  | 725  | 15  | Chinese cohorts | MAG | human body | oral cavity |
| SRR6748185.metaspades.bin.21                        | CNA0071068 | 100   | 0    | 43.30 | 91.27 | TRUE | 715,743   | 770  | 724  | 8   | Chinese cohorts | MAG | human body | oral cavity |
| SRR6748220.metaspades.bin.9                         | CNA0071071 | 97.67 | 4.65 | 43.27 | 91.39 | TRUE | 733,306   | 780  | 734  | 67  | Chinese cohorts | MAG | human body | oral cavity |
| SRR6748223.metaspades.bin.14                        | CNA0071073 | 95.35 | 2.33 | 43.35 | 91.37 | TRUE | 707,705   | 756  | 711  | 37  | Chinese cohorts | MAG | human body | oral cavity |
| SRR6748223.metaspades.bin.6                         | CNA0071076 | 100   | 0    | 36.62 | 90.55 | TRUE | 669,361   | 702  | 661  | 55  | Chinese cohorts | MAG | human body | oral cavity |
| SRR8114009.metaspades.bin.3                         | CNA0071079 | 93.02 | 0    | 43.54 | 92.75 | TRUE | 619,181   | 685  | 648  | 30  | Chinese cohorts | MAG | human body | oral cavity |
| SRR8114033.metaspades.bin.42                        | CNA0071082 | 90.7  | 0    | 54.62 | 90.35 | TRUE | 800,797   | 808  | 763  | 62  | Chinese cohorts | MAG | human body | oral cavity |
| SRR8114034.metaspades.bin.21                        | CNA0071085 | 95.35 | 0    | 43.50 | 92.95 | TRUE | 699,451   | 750  | 713  | 2   | Chinese cohorts | MAG | human body | oral cavity |
| SRR8114041.metaspades.bin.6                         | CNA0071088 | 100   | 2.33 | 43.08 | 91.71 | TRUE | 767,376   | 838  | 792  | 15  | Chinese cohorts | MAG | human body | oral cavity |
| SRR8114048.metaspades.bin.17                        | CNA0071090 | 97.67 | 0    | 41.63 | 89.17 | TRUE | 638,527   | 624  | 581  | 70  | Chinese cohorts | MAG | human body | oral cavity |
| SRR8114052.metaspades.bin.61                        | CNA0071093 | 97.67 | 2.33 | 36.29 | 90.89 | TRUE | 650,198   | 678  | 640  | 41  | Chinese cohorts | MAG | human body | oral cavity |
| SRR8114056.metaspades.bin.5                         | CNA0071096 | 95.35 | 0    | 41.26 | 89.17 | TRUE | 763,002   | 739  | 692  | 15  | Chinese cohorts | MAG | human body | oral cavity |
| SRR8114063.metaspades.bin.48                        | CNA0071099 | 100   | 0    | 43.05 | 91.85 | TRUE | 736,672   | 802  | 757  | 8   | Chinese cohorts | MAG | human body | oral cavity |
| SRR8114071.metaspades.bin.18                        | CNA0071102 | 93.02 | 4.65 | 35.61 | 89.68 | TRUE | 699,877   | 737  | 699  | 54  | Chinese cohorts | MAG | human body | oral cavity |
| SRR8114076.metaspades.bin.27                        | CNA0071104 | 100   | 0    | 43.25 | 91.58 | TRUE | 735,079   | 788  | 741  | 5   | Chinese cohorts | MAG | human body | oral cavity |
| SRR8114077.metaspades.bin.2                         | CNA0071108 | 100   | 0    | 43.24 | 91.55 | TRUE | 734,851   | 787  | 741  | 4   | Chinese cohorts | MAG | human body | oral cavity |
| SRR8114096.metaspades.bin.1                         | CNA0071110 | 95.35 | 0    | 43.27 | 92.27 | TRUE | 738,158   | 779  | 734  | 13  | Chinese cohorts | MAG | human body | oral cavity |
| RSZAXPI002304-13_RAH_dental.metaspades.bin.45       | CNA0070016 | 100   | 4.65 | 38.41 | 90.46 | TRUE | 848,810   | 874  | 829  | 11  | Chinese cohorts | MAG | human body | oral cavity |
| RSZAXPI002305-14_RAH_dental.metaspades.bin.61       | CNA0070018 | 97.67 | 0    | 36.94 | 90.80 | TRUE | 687,665   | 732  | 693  | 19  | Chinese cohorts | MAG | human body | oral cavity |
| RSZAXPI002305-14_RAH_dental.metaspades.bin.64       | CNA0070019 | 93.02 | 0    | 51.06 | 89.98 | TRUE | 690,622   | 646  | 604  | 64  | Chinese cohorts | MAG | human body | oral cavity |
| RSZAXPI002306-15_2_RAH_saliva.metaspades.bin.36     | CNA0070021 | 93.02 | 2.33 | 36.39 | 90.36 | TRUE | 561,519   | 572  | 539  | 133 | Chinese cohorts | MAG | human body | oral cavity |
| RSZAXPI002308-17_RAH_dental.metaspades.bin.14       | CNA0070023 | 97.67 | 4.65 | 38.35 | 89.38 | TRUE | 784,792   | 763  | 717  | 17  | Chinese cohorts | MAG | human body | oral cavity |
| RSZAXPI002308-17_RAH_dental.metaspades.bin.47       | CNA0070024 | 97.67 | 0    | 38.03 | 90.58 | TRUE | 791,905   | 827  | 784  | 5   | Chinese cohorts | MAG | human body | oral cavity |
| RSZAXPI002309-18_RAH_dental.metaspades.bin.28       | CNA0070026 | 100   | 2.33 | 38.16 | 91.05 | TRUE | 740,704   | 750  | 713  | 6   | Chinese cohorts | MAG | human body | oral cavity |
| RSZAXPI002310-19_RAH_dental.metaspades.bin.24       | CNA0070028 | 97.67 | 0    | 50.22 | 89.36 | TRUE | 839,358   | 800  | 752  | 20  | Chinese cohorts | MAG | human body | oral cavity |
| RSZAXPI002311-20_RAH_dental.metaspades.bin.31       | CNA0070029 | 97.67 | 0    | 51.10 | 85.71 | TRUE | 927,890   | 996  | 957  | 9   | Chinese cohorts | MAG | human body | oral cavity |
| RSZAXPI002311-20_RAH_dental.metaspades.bin.69       | CNA0070031 | 93.02 | 2.33 | 37.83 | 91.34 | TRUE | 703,299   | 718  | 678  | 63  | Chinese cohorts | MAG | human body | oral cavity |
| RSZAXPI002311-20_RAH_dental.metaspades.bin.6        | CNA0070033 | 97.67 | 2.33 | 49.07 | 90.03 | TRUE | 764,097   | 789  | 750  | 12  | Chinese cohorts | MAG | human body | oral cavity |
| RSZAXPI002312-21_RAH_dental.metaspades.bin.14       | CNA0070035 | 95.35 | 0    | 50.61 | 88.95 | TRUE | 770,089   | 719  | 678  | 72  | Chinese cohorts | MAG | human body | oral cavity |
| RSZAXPI002312-21_RAH_dental.metaspades.bin.60       | CNA0070036 | 100   | 0    | 38.72 | 90.75 | TRUE | 888,286   | 908  | 865  | 8   | Chinese cohorts | MAG | human body | oral cavity |
| RSZAXPI002313-22_RAH_dental.metaspades.bin.34       | CNA0070038 | 95.35 | 2.33 | 42.64 | 90.23 | TRUE | 694,083   | 708  | 675  | 121 | Chinese cohorts | MAG | human body | oral cavity |
| RSZAXPI002313-22_RAH_dental.metaspades.bin.48       | CNA0070040 | 95.35 | 0    | 44.03 | 91.93 | TRUE | 559,948   | 570  | 534  | 58  | Chinese cohorts | MAG | human body | oral cavity |
| RSZAXPI002313-22_RAH_dental.metaspades.bin.87       | CNA0070041 | 100   | 0    | 41.50 | 91.53 | TRUE | 678,482   | 702  | 655  | 10  | Chinese cohorts | MAG | human body | oral cavity |



|                                                  |            |       |      |       |       |      |           |      |      |     |                 |     |            |             |
|--------------------------------------------------|------------|-------|------|-------|-------|------|-----------|------|------|-----|-----------------|-----|------------|-------------|
| RSZAXPI002314-23_RAH_dental.metaspades.bin.46    | CNA0070043 | 93.02 | 2.33 | 37.65 | 90.34 | TRUE | 645,898   | 682  | 648  | 49  | Chinese cohorts | MAG | human body | oral cavity |
| RSZAXPI002314-23_RAH_dental.metaspades.bin.51    | CNA0070045 | 93.02 | 0    | 34.16 | 89.21 | TRUE | 680,269   | 681  | 650  | 85  | Chinese cohorts | MAG | human body | oral cavity |
| RSZAXPI002315-24_RAH_dental.metaspades.bin.39    | CNA0070047 | 100   | 2.33 | 48.96 | 90.64 | TRUE | 891,548   | 933  | 888  | 15  | Chinese cohorts | MAG | human body | oral cavity |
| RSZAXPI002315-24_RAH_dental.metaspades.bin.62    | CNA0070048 | 97.67 | 0    | 38.02 | 90.70 | TRUE | 647,691   | 676  | 636  | 5   | Chinese cohorts | MAG | human body | oral cavity |
| RSZAXPI002316-25_RAH_dental.metaspades.bin.26    | CNA0070050 | 95.35 | 4.65 | 48.31 | 91.15 | TRUE | 754,262   | 796  | 755  | 87  | Chinese cohorts | MAG | human body | oral cavity |
| RSZAXPI002316-25_RAH_dental.metaspades.bin.41    | CNA0070052 | 90.7  | 2.33 | 46.97 | 87.36 | TRUE | 703,378   | 734  | 706  | 44  | Chinese cohorts | MAG | human body | oral cavity |
| RSZAXPI002316-25_RAH_dental.metaspades.bin.44    | CNA0070053 | 100   | 0    | 38.20 | 90.31 | TRUE | 820,808   | 854  | 812  | 14  | Chinese cohorts | MAG | human body | oral cavity |
| RSZAXPI002318-27_RAH_dental.metaspades.bin.13    | CNA0070055 | 100   | 0    | 51.52 | 85.39 | TRUE | 1,061,752 | 1112 | 1066 | 14  | Chinese cohorts | MAG | human body | oral cavity |
| RSZAXPI002318-27_RAH_dental.metaspades.bin.2     | CNA0070056 | 95.35 | 2.33 | 37.95 | 89.73 | TRUE | 793,629   | 852  | 805  | 95  | Chinese cohorts | MAG | human body | oral cavity |
| RSZAXPI002318-27_RAH_dental.metaspades.bin.48    | CNA0070058 | 93.02 | 4.65 | 48.45 | 91.44 | TRUE | 717,025   | 731  | 695  | 110 | Chinese cohorts | MAG | human body | oral cavity |
| RSZAXPI002318-27_RAH_dental.metaspades.bin.53    | CNA0070060 | 97.67 | 0    | 38.41 | 89.50 | TRUE | 765,703   | 765  | 717  | 25  | Chinese cohorts | MAG | human body | oral cavity |
| RSZAXPI002319-31_RAH_dental.metaspades.bin.72    | CNA0070062 | 97.67 | 0    | 34.13 | 89.29 | TRUE | 756,765   | 758  | 715  | 9   | Chinese cohorts | MAG | human body | oral cavity |
| RSZAXPI002321-33_RAH_dental.metaspades.bin.17    | CNA0070063 | 100   | 0    | 37.87 | 90.45 | TRUE | 789,526   | 819  | 781  | 8   | Chinese cohorts | MAG | human body | oral cavity |
| RSZAXPI002321-33_RAH_dental.metaspades.bin.23    | CNA0070065 | 100   | 0    | 51.19 | 85.31 | TRUE | 1,115,144 | 1155 | 1112 | 8   | Chinese cohorts | MAG | human body | oral cavity |
| RSZAXPI002321-33_RAH_dental.metaspades.bin.29    | CNA0070067 | 95.35 | 0    | 50.47 | 89.07 | TRUE | 745,962   | 699  | 660  | 60  | Chinese cohorts | MAG | human body | oral cavity |
| RSZAXPI002322-34_RAH_dental.metaspades.bin.14    | CNA0070068 | 100   | 0    | 37.99 | 90.86 | TRUE | 763,678   | 786  | 745  | 8   | Chinese cohorts | MAG | human body | oral cavity |
| RSZAXPI002323-35_RAH_dental.metaspades.bin.28    | CNA0070070 | 100   | 0    | 51.86 | 85.72 | TRUE | 1,023,356 | 1068 | 1017 | 10  | Chinese cohorts | MAG | human body | oral cavity |
| RSZAXPI002324-37_RAH_dental.metaspades.bin.18    | CNA0070072 | 97.67 | 2.33 | 33.99 | 89.90 | TRUE | 716,668   | 732  | 693  | 55  | Chinese cohorts | MAG | human body | oral cavity |
| RSZAXPI002324-37_RAH_dental.metaspades.bin.42    | CNA0070073 | 95.35 | 0    | 43.34 | 92.09 | TRUE | 686,173   | 743  | 703  | 12  | Chinese cohorts | MAG | human body | oral cavity |
| RSZAXPI002324-37_RAH_dental.metaspades.bin.77    | CNA0070075 | 100   | 0    | 37.59 | 90.85 | TRUE | 683,683   | 706  | 664  | 12  | Chinese cohorts | MAG | human body | oral cavity |
| RSZAXPI002325-39_RAH_dental.metaspades.bin.11    | CNA0070077 | 100   | 2.33 | 48.01 | 90.83 | TRUE | 791,699   | 818  | 771  | 11  | Chinese cohorts | MAG | human body | oral cavity |
| RSZAXPI002325-39_RAH_dental.metaspades.bin.28    | CNA0070078 | 97.67 | 0    | 50.98 | 91.70 | TRUE | 651,619   | 708  | 683  | 64  | Chinese cohorts | MAG | human body | oral cavity |
| RSZAXPI002325-39_RAH_dental.metaspades.bin.45    | CNA0070080 | 100   | 0    | 38.06 | 90.35 | TRUE | 831,230   | 855  | 811  | 5   | Chinese cohorts | MAG | human body | oral cavity |
| RSZAXPI002326-41_RAH_dental.metaspades.bin.24    | CNA0070082 | 100   | 2.33 | 47.61 | 91.35 | TRUE | 888,404   | 926  | 883  | 6   | Chinese cohorts | MAG | human body | oral cavity |
| RSZAXPI002326-41_RAH_dental.metaspades.bin.35    | CNA0070083 | 95.35 | 2.33 | 49.10 | 90.65 | TRUE | 837,104   | 872  | 830  | 8   | Chinese cohorts | MAG | human body | oral cavity |
| RSZAXPI002326-41_RAH_dental.metaspades.bin.62    | CNA0070085 | 97.67 | 0    | 34.24 | 89.74 | TRUE | 747,856   | 741  | 702  | 6   | Chinese cohorts | MAG | human body | oral cavity |
| RSZAXPI002326-41_RAH_dental.metaspades.bin.6     | CNA0070087 | 100   | 0    | 38.18 | 90.49 | TRUE | 807,241   | 820  | 777  | 5   | Chinese cohorts | MAG | human body | oral cavity |
| RSZAXPI002326-41_RAH_dental.metaspades.bin.8     | CNA0070089 | 100   | 2.33 | 39.55 | 89.07 | TRUE | 794,337   | 801  | 754  | 4   | Chinese cohorts | MAG | human body | oral cavity |
| RSZAXPI002330-47_RAH_dental.metaspades.bin.26    | CNA0070090 | 93.02 | 2.33 | 47.56 | 91.54 | TRUE | 817,781   | 877  | 839  | 30  | Chinese cohorts | MAG | human body | oral cavity |
| RSZAXPI002330-47_RAH_dental.metaspades.bin.66    | CNA0070092 | 93.02 | 0    | 51.76 | 85.45 | TRUE | 1,008,380 | 1049 | 1009 | 128 | Chinese cohorts | MAG | human body | oral cavity |
| RSZAXPI002330-47_RAH_dental.metaspades.bin.70    | CNA0070094 | 97.67 | 0    | 50.27 | 89.71 | TRUE | 837,577   | 780  | 732  | 18  | Chinese cohorts | MAG | human body | oral cavity |
| RSZAXPI002331-56_RAH_dental.metaspades.bin.18    | CNA0070095 | 93.02 | 0    | 51.11 | 88.83 | TRUE | 729,087   | 685  | 646  | 102 | Chinese cohorts | MAG | human body | oral cavity |
| RSZAXPI002331-56_RAH_dental.metaspades.bin.3     | CNA0070097 | 95.35 | 4.65 | 48.35 | 91.48 | TRUE | 738,700   | 778  | 740  | 43  | Chinese cohorts | MAG | human body | oral cavity |
| RSZAXPI002331-56_RAH_dental.metaspades.bin.43    | CNA0070099 | 100   | 0    | 37.43 | 91.30 | TRUE | 690,312   | 701  | 669  | 11  | Chinese cohorts | MAG | human body | oral cavity |
| RSZAXPI002331-56_RAH_dental.metaspades.bin.80    | CNA0070100 | 100   | 4.65 | 36.78 | 90.25 | TRUE | 694,434   | 742  | 702  | 50  | Chinese cohorts | MAG | human body | oral cavity |
| RSZAXPI002332-57_RAH_dental.metaspades.bin.16    | CNA0070102 | 100   | 4.65 | 48.83 | 90.31 | TRUE | 930,040   | 980  | 934  | 26  | Chinese cohorts | MAG | human body | oral cavity |
| RSZAXPI002454-50_RAH_dental.metaspades.bin.3     | CNA0070104 | 100   | 2.33 | 37.91 | 90.93 | TRUE | 771,688   | 792  | 750  | 9   | Chinese cohorts | MAG | human body | oral cavity |
| RSZAXPI002455-75_RAH_dental.metaspades.bin.27    | CNA0070106 | 100   | 4.65 | 51.04 | 89.59 | TRUE | 730,839   | 677  | 634  | 48  | Chinese cohorts | MAG | human body | oral cavity |
| RSZAXPI002455-75_RAH_dental.metaspades.bin.33    | CNA0070107 | 97.67 | 2.33 | 38.10 | 90.99 | TRUE | 805,839   | 813  | 771  | 20  | Chinese cohorts | MAG | human body | oral cavity |
| RSZAXPI002456-79_RAH_dental.metaspades.bin.34    | CNA0070109 | 93.02 | 0    | 50.88 | 89.55 | TRUE | 707,585   | 661  | 621  | 33  | Chinese cohorts | MAG | human body | oral cavity |
| RSZAXPI002456-79_RAH_dental.metaspades.bin.7     | CNA0070111 | 97.67 | 0    | 38.08 | 89.65 | TRUE | 724,069   | 710  | 661  | 10  | Chinese cohorts | MAG | human body | oral cavity |
| RSZAXPI002458-89_RAH_dental.metaspades.bin.11    | CNA0070112 | 100   | 0    | 38.02 | 91.05 | TRUE | 762,521   | 781  | 743  | 14  | Chinese cohorts | MAG | human body | oral cavity |
| RSZAXPI002458-89_RAH_dental.metaspades.bin.78    | CNA0070114 | 97.67 | 0    | 33.98 | 89.83 | TRUE | 727,881   | 725  | 687  | 16  | Chinese cohorts | MAG | human body | oral cavity |
| RSZAXPI002459-90_RAH_dental.metaspades.bin.59    | CNA0070116 | 97.67 | 0    | 37.44 | 91.05 | TRUE | 730,202   | 747  | 711  | 62  | Chinese cohorts | MAG | human body | oral cavity |
| RSZAXPI002460-93_2_RAH_saliva.metaspades.bin.17  | CNA0070117 | 100   | 2.33 | 43.07 | 90.57 | TRUE | 751,015   | 795  | 747  | 63  | Chinese cohorts | MAG | human body | oral cavity |
| RSZAXPI002460-93_2_RAH_saliva.metaspades.bin.39  | CNA0070119 | 93.02 | 2.33 | 35.29 | 90.00 | TRUE | 655,985   | 696  | 662  | 74  | Chinese cohorts | MAG | human body | oral cavity |
| RSZAXPI002460-93_RAH_saliva.metaspades.bin.2     | CNA0070121 | 100   | 2.33 | 43.09 | 90.77 | TRUE | 752,123   | 803  | 757  | 59  | Chinese cohorts | MAG | human body | oral cavity |
| RSZAXPI002465-98_2_RAH_saliva.metaspades.bin.9   | CNA0070122 | 95.35 | 2.33 | 42.90 | 91.01 | TRUE | 629,557   | 627  | 600  | 96  | Chinese cohorts | MAG | human body | oral cavity |
| RSZAXPI002469-104_2_RAH_saliva.metaspades.bin.11 | CNA0070124 | 95.35 | 0    | 43.34 | 91.08 | TRUE | 719,350   | 769  | 723  | 64  | Chinese cohorts | MAG | human body | oral cavity |
| RSZAXPI002470-105_2_RAH_saliva.metaspades.bin.33 | CNA0070126 | 100   | 0    | 36.36 | 90.57 | TRUE | 659,004   | 681  | 640  | 9   | Chinese cohorts | MAG | human body | oral cavity |
| RSZAXPI002470-105_RAH_saliva.metaspades.bin.10   | CNA0070128 | 100   | 0    | 36.28 | 89.96 | TRUE | 657,004   | 683  | 644  | 43  | Chinese cohorts | MAG | human body | oral cavity |
| RSZAXPI002470-105_RAH_saliva.metaspades.bin.14   | CNA0070129 | 97.67 | 4.65 | 43.27 | 91.91 | TRUE | 738,808   | 805  | 761  | 46  | Chinese cohorts | MAG | human body | oral cavity |
| RSZAXPI002471-106_2_RAH_saliva.metaspades.bin.25 | CNA0070131 | 90.7  | 2.33 | 54.54 | 90.60 | TRUE | 769,635   | 822  | 787  | 124 | Chinese cohorts | MAG | human body | oral cavity |
| RSZAXPI002477-142_2_RAH_saliva.metaspades.bin.82 | CNA0070133 | 97.67 | 0    | 43.06 | 91.25 | TRUE | 739,784   | 791  | 745  | 29  | Chinese cohorts | MAG | human body | oral cavity |
| RSZAXPI002479-169_2_RAH_saliva.metaspades.bin.78 | CNA0070134 | 100   | 0    | 42.01 | 90.19 | TRUE | 712,571   | 699  | 652  | 8   | Chinese cohorts | MAG | human body | oral cavity |
| RSZAXPI002479-169_RAH_saliva.metaspades.bin.73   | CNA0070136 | 100   | 0    | 42.00 | 90.49 | TRUE | 708,388   | 694  | 654  | 39  | Chinese cohorts | MAG | human body | oral cavity |
| RSZAXPI002482-15_2_RAH_saliva.metaspades.bin.8   | CNA0070138 | 97.67 | 0    | 43.41 | 91.15 | TRUE | 665,504   | 740  | 696  | 121 | Chinese cohorts | MAG | human body | oral cavity |
| RSZAXPI002603-21_RA_dental.metaspades.bin.27     | CNA0070139 | 100   | 2.33 | 47.08 | 91.27 | TRUE | 1,238,179 | 1318 | 1266 | 64  | Chinese cohorts | MAG | human body | oral cavity |
| RSZAXPI002603-21_RA_dental.metaspades.bin.30     | CNA0070141 | 93.02 | 0    | 50.82 | 88.62 | TRUE | 686,465   | 650  | 607  | 13  | Chinese cohorts | MAG | human body | oral cavity |
| RSZAXPI002603-21_RA_dental.metaspades.bin.63     | CNA0070143 | 97.67 | 0    | 38.24 | 89.29 | TRUE | 747,784   | 721  | 674  | 7   | Chinese cohorts | MAG | human body | oral cavity |
| RSZAXPI002604-26_RA_dental.metaspades.bin.30     | CNA0070145 | 100   | 0    | 52.11 | 91.90 | TRUE | 725,716   | 774  | 732  | 6   | Chinese cohorts | MAG | human body | oral cavity |
| RSZAXPI002604-26_RA_dental.metaspades.bin.36     | CNA0070146 | 100   | 0    | 38.32 | 90.83 | TRUE | 811,208   | 839  | 795  | 5   | Chinese cohorts | MAG | human body | oral cavity |
| RSZAXPI002604-26_RA_dental.metaspades.bin.6      | CNA0070148 | 97.67 | 0    | 50.54 | 89.10 | TRUE | 774,850   | 730  | 683  | 11  | Chinese cohorts | MAG | human body | oral cavity |
| RSZAXPI002606-27_RA_dental.metaspades.bin.28     | CNA0070150 | 97.67 | 0    | 38.12 | 89.27 | TRUE | 795,831   | 807  | 759  | 3   | Chinese cohorts | MAG | human body | oral cavity |
| RSZAXPI002606-27_RA_dental.metaspades.bin.59     | CNA0070152 | 97.67 | 0    | 34.00 | 89.81 | TRUE | 731,585   | 737  | 700  | 9   | Chinese cohorts | MAG | human body | oral cavity |
| RSZAXPI002609-25_RA_dental.metaspades.bin.20     | CNA0070153 | 100   | 0    | 51.09 | 85.50 | TRUE | 1,114,897 | 1159 | 1114 | 14  | Chinese cohorts | MAG | human body | oral cavity |
| RSZAXPI002609-25_RA_dental.metaspades.bin.46     | CNA0070155 | 100   | 0    | 38.06 | 90.57 | TRUE | 766,939   | 800  | 758  | 10  | Chinese cohorts | MAG | human body | oral cavity |
| RSZAXPI002612-20_RA_dental.metaspades.bin.34     | CNA0070157 | 100   | 4.65 | 48.38 | 90.83 | TRUE | 720,602   | 751  | 704  | 6   | Chinese cohorts | MAG | human body | oral cavity |
| RSZAXPI002613-24_RA_dental.metaspades.bin.37     | CNA0070159 | 100   | 0    | 50.99 | 91.32 | TRUE | 786,836   | 859  | 815  | 6   | Chinese cohorts | MAG | human body | oral cavity |
| RSZAXPI002613-24_RA_dental.metaspades.bin.48     | CNA0070160 | 100   | 0    | 38.92 | 90.56 | TRUE | 902,700   | 935  | 893  | 9   | Chinese cohorts | MAG | human body | oral cavity |
| RSZAXPI002614-22_RA_dental.metaspades.bin.18     | CNA0070162 | 97.67 | 0    | 50.57 | 89.98 | TRUE | 787,981   | 744  | 696  | 39  | Chinese cohorts | MAG | human body | oral cavity |
| RSZAXPI002617-32_RA_dental.metaspades.bin.17     | CNA0070164 | 100   | 2.33 | 47.90 | 91.00 | TRUE | 783,849   | 837  | 794  | 30  | Chinese cohorts | MAG | human body | oral cavity |
| RSZAXPI002617-32_RA_dental.metaspades.bin.20     | CNA0070166 | 100   | 0    | 37.97 | 90.37 | TRUE | 763,712   | 801  | 764  | 8   | Chinese cohorts | MAG | human body | oral cavity |
| RSZAXPI002619-34_RA_dental.metaspades.bin.16     | CNA0070168 | 97.67 | 0    | 33.90 | 89.59 | TRUE | 728,690   | 741  | 702  | 14  | Chinese cohorts | MAG | human body | oral cavity |
| RSZAXPI002619-34_RA_dental.metaspades.bin.39     | CNA0070169 | 95.35 | 0    | 51.81 | 90.70 | TRUE | 860,283   | 919  | 879  | 17  | Chinese cohorts | MAG | human body | oral cavity |
| RSZAXPI002619-34_RA_dental.metaspades.bin.45     | CNA0070171 | 97.67 | 0    | 50.47 | 88.72 | TRUE | 624,489   | 585  | 552  | 20  | Chinese cohorts | MAG | human body | oral cavity |
| RSZAXPI002619-34_RA_dental.metaspades.bin.5      | CNA0070173 | 100   | 0    | 41.41 | 89.12 | TRUE | 778,191   | 740  | 693  | 9   | Chinese cohorts | MAG | human body | oral cavity |
| RSZAXPI002620-35_RA_dental.metaspades.bin.12     | CNA0070175 | 100   | 2.33 | 47.91 | 91.04 | TRUE | 861,991   | 905  | 856  | 11  | Chinese cohorts | MAG | human body | oral cavity |
| RSZAXPI002620-35_RA_dental.metaspades.bin.1      | CNA0070176 | 95.35 | 2.33 | 46.98 | 91.64 | TRUE | 916,239   | 992  | 952  | 27  | Chinese cohorts | MAG | human body | oral cavity |
| RSZAXPI002620-35_RA_dental.metaspades.bin.36     | CNA0070178 | 97.67 | 2.33 | 37.83 | 91.54 | TRUE | 685,687   | 697  | 663  | 62  | Chinese cohorts | MAG | human body | oral cavity |
| RSZAXPI002620-35_RA_dental.metaspades.bin.60     | CNA0070180 | 93.02 | 0    | 50.72 | 89.13 | TRUE | 717,562   | 655  | 615  | 16  | Chinese cohorts | MAG | human body | oral cavity |

|                                               |            |       |      |       |       |      |           |      |      |     |                 |     |            |             |
|-----------------------------------------------|------------|-------|------|-------|-------|------|-----------|------|------|-----|-----------------|-----|------------|-------------|
| RSZAXPI002622-39_RA_saliva.metaspades.bin.19  | CNA0070182 | 90.7  | 0    | 41.11 | 88.05 | TRUE | 617,562   | 620  | 590  | 128 | Chinese cohorts | MAG | human body | oral cavity |
| RSZAXPI002625-57_RA_dental.metaspades.bin.44  | CNA0070184 | 100   | 2.33 | 46.73 | 90.50 | TRUE | 789,177   | 827  | 784  | 16  | Chinese cohorts | MAG | human body | oral cavity |
| RSZAXPI002626-66_RA_dental.metaspades.bin.71  | CNA0070186 | 100   | 0    | 37.40 | 90.83 | TRUE | 652,055   | 663  | 631  | 8   | Chinese cohorts | MAG | human body | oral cavity |
| RSZAXPI002627-75_RA_dental.metaspades.bin.12  | CNA0070187 | 100   | 0    | 38.78 | 90.72 | TRUE | 883,168   | 921  | 876  | 30  | Chinese cohorts | MAG | human body | oral cavity |
| RSZAXPI002627-75_RA_dental.metaspades.bin.25  | CNA0070189 | 95.35 | 2.33 | 50.70 | 88.78 | TRUE | 807,071   | 751  | 707  | 73  | Chinese cohorts | MAG | human body | oral cavity |
| RSZAXPI002628-79_RA_dental.metaspades.bin.30  | CNA0070191 | 93.02 | 0    | 49.75 | 91.15 | TRUE | 663,423   | 686  | 657  | 72  | Chinese cohorts | MAG | human body | oral cavity |
| RSZAXPI002629-81_RA_dental.metaspades.bin.76  | CNA0070192 | 95.35 | 2.33 | 52.42 | 85.93 | TRUE | 942,524   | 1016 | 979  | 140 | Chinese cohorts | MAG | human body | oral cavity |
| RSZAXPI002629-81_RA_dental.metaspades.bin.82  | CNA0070194 | 93.02 | 0    | 50.44 | 88.36 | TRUE | 765,049   | 729  | 681  | 23  | Chinese cohorts | MAG | human body | oral cavity |
| RSZAXPI002632-89_RA_dental.metaspades.bin.17  | CNA0070195 | 100   | 0    | 39.64 | 89.21 | TRUE | 792,907   | 789  | 741  | 8   | Chinese cohorts | MAG | human body | oral cavity |
| RSZAXPI002633-90_RA_dental.metaspades.bin.24  | CNA0070196 | 97.67 | 0    | 35.33 | 89.99 | TRUE | 649,115   | 687  | 647  | 18  | Chinese cohorts | MAG | human body | oral cavity |
| RSZAXPI002633-90_RA_dental.metaspades.bin.41  | CNA0070198 | 100   | 2.33 | 38.31 | 90.85 | TRUE | 839,279   | 861  | 821  | 12  | Chinese cohorts | MAG | human body | oral cavity |
| RSZAXPI002633-90_RA_dental.metaspades.bin.49  | CNA0070199 | 100   | 2.33 | 47.47 | 90.81 | TRUE | 885,805   | 916  | 867  | 4   | Chinese cohorts | MAG | human body | oral cavity |
| RSZAXPI002633-90_RA_dental.metaspades.bin.54  | CNA0070201 | 97.67 | 0    | 50.45 | 88.81 | TRUE | 827,389   | 773  | 725  | 14  | Chinese cohorts | MAG | human body | oral cavity |
| RSZAXPI002635-94_RA_dental.metaspades.bin.41  | CNA0070202 | 93.02 | 2.33 | 46.67 | 90.84 | TRUE | 788,102   | 878  | 840  | 23  | Chinese cohorts | MAG | human body | oral cavity |
| RSZAXPI002636-95_RA_dental.metaspades.bin.12  | CNA0070204 | 100   | 4.65 | 47.96 | 91.08 | TRUE | 852,980   | 907  | 860  | 38  | Chinese cohorts | MAG | human body | oral cavity |
| RSZAXPI002636-95_RA_dental.metaspades.bin.22  | CNA0070205 | 100   | 0    | 51.12 | 92.01 | TRUE | 776,503   | 854  | 813  | 7   | Chinese cohorts | MAG | human body | oral cavity |
| RSZAXPI002636-95_RA_dental.metaspades.bin.30  | CNA0070206 | 95.35 | 0    | 37.71 | 89.87 | TRUE | 792,766   | 794  | 755  | 94  | Chinese cohorts | MAG | human body | oral cavity |
| RSZAXPI002636-95_RA_dental.metaspades.bin.34  | CNA0070208 | 90.7  | 0    | 52.21 | 85.95 | TRUE | 838,912   | 922  | 887  | 161 | Chinese cohorts | MAG | human body | oral cavity |
| RSZAXPI002637-96_RA_dental.metaspades.bin.23  | CNA0070209 | 97.67 | 4.65 | 37.96 | 89.11 | TRUE | 821,612   | 838  | 790  | 83  | Chinese cohorts | MAG | human body | oral cavity |
| RSZAXPI002637-96_RA_dental.metaspades.bin.5   | CNA0070211 | 97.67 | 2.33 | 46.76 | 90.96 | TRUE | 718,713   | 776  | 737  | 8   | Chinese cohorts | MAG | human body | oral cavity |
| RSZAXPI002639-98_RA_dental.metaspades.bin.8   | CNA0070212 | 95.35 | 0    | 50.19 | 89.22 | TRUE | 797,758   | 740  | 699  | 20  | Chinese cohorts | MAG | human body | oral cavity |
| RSZAXPI002641-101_RA_dental.metaspades.bin.19 | CNA0070214 | 93.02 | 2.33 | 44.28 | 92.50 | TRUE | 642,332   | 689  | 652  | 14  | Chinese cohorts | MAG | human body | oral cavity |
| RSZAXPI002641-101_RA_dental.metaspades.bin.55 | CNA0070215 | 93.02 | 0    | 37.69 | 91.40 | TRUE | 658,791   | 674  | 643  | 6   | Chinese cohorts | MAG | human body | oral cavity |
| RSZAXPI002641-101_RA_dental.metaspades.bin.62 | CNA0070217 | 95.35 | 4.65 | 49.15 | 90.36 | TRUE | 814,521   | 832  | 792  | 70  | Chinese cohorts | MAG | human body | oral cavity |
| RSZAXPI002650-142_RA_saliva.metaspades.bin.28 | CNA0070218 | 100   | 0    | 52.29 | 85.84 | TRUE | 977,398   | 1018 | 974  | 43  | Chinese cohorts | MAG | human body | oral cavity |
| RSZAXPI002653-13_RA_saliva.metaspades.bin.41  | CNA0070219 | 100   | 4.65 | 51.73 | 85.49 | TRUE | 1,123,451 | 1161 | 1110 | 51  | Chinese cohorts | MAG | human body | oral cavity |
| RSZAXPI002653-13_RA_saliva.metaspades.bin.70  | CNA0070221 | 95.35 | 2.33 | 43.27 | 92.13 | TRUE | 694,351   | 745  | 704  | 32  | Chinese cohorts | MAG | human body | oral cavity |
| RSZAXPI002655-15_RA_dental.metaspades.bin.1   | CNA0070222 | 97.67 | 0    | 37.82 | 89.66 | TRUE | 719,681   | 744  | 698  | 8   | Chinese cohorts | MAG | human body | oral cavity |
| RSZAXPI002655-15_RA_dental.metaspades.bin.44  | CNA0070224 | 100   | 0    | 39.61 | 89.49 | TRUE | 771,680   | 761  | 714  | 13  | Chinese cohorts | MAG | human body | oral cavity |
| RSZAXPI002656-16_RA_dental.metaspades.bin.48  | CNA0070226 | 95.35 | 2.33 | 50.45 | 89.24 | TRUE | 787,481   | 738  | 690  | 42  | Chinese cohorts | MAG | human body | oral cavity |
| RSZAXPI002657-17_RA_dental.metaspades.bin.13  | CNA0070227 | 97.67 | 0    | 34.05 | 89.43 | TRUE | 736,629   | 734  | 695  | 15  | Chinese cohorts | MAG | human body | oral cavity |
| RSZAXPI002657-17_RA_dental.metaspades.bin.27  | CNA0070228 | 100   | 2.33 | 48.88 | 89.86 | TRUE | 913,638   | 957  | 913  | 10  | Chinese cohorts | MAG | human body | oral cavity |
| RSZAXPI002657-17_RA_dental.metaspades.bin.42  | CNA0070230 | 93.02 | 2.33 | 47.58 | 91.65 | TRUE | 699,546   | 728  | 685  | 4   | Chinese cohorts | MAG | human body | oral cavity |
| RSZAXPI002673-20_RA_dental.metaspades.bin.25  | CNA0070231 | 100   | 2.33 | 47.50 | 90.89 | TRUE | 878,397   | 931  | 886  | 14  | Chinese cohorts | MAG | human body | oral cavity |
| RSZAXPI002673-20_RA_dental.metaspades.bin.3   | CNA0070233 | 100   | 0    | 38.02 | 90.37 | TRUE | 753,131   | 792  | 753  | 30  | Chinese cohorts | MAG | human body | oral cavity |
| RSZAXPI002673-20_RA_dental.metaspades.bin.43  | CNA0070235 | 100   | 2.33 | 48.70 | 89.96 | TRUE | 891,458   | 922  | 873  | 8   | Chinese cohorts | MAG | human body | oral cavity |
| RSZAXPI002674-21_RA_dental.metaspades.bin.42  | CNA0070236 | 97.67 | 4.65 | 46.84 | 90.31 | TRUE | 851,084   | 913  | 873  | 21  | Chinese cohorts | MAG | human body | oral cavity |
| RSZAXPI002675-22_RA_dental.metaspades.bin.45  | CNA0070238 | 97.67 | 0    | 50.49 | 88.90 | TRUE | 816,483   | 763  | 716  | 17  | Chinese cohorts | MAG | human body | oral cavity |
| RSZAXPI002675-22_RA_dental.metaspades.bin.61  | CNA0070239 | 97.67 | 0    | 52.45 | 85.73 | TRUE | 934,750   | 959  | 918  | 27  | Chinese cohorts | MAG | human body | oral cavity |
| RSZAXPI002681-31_RA_saliva.metaspades.bin.57  | CNA0070241 | 95.35 | 2.33 | 43.80 | 91.97 | TRUE | 648,381   | 671  | 637  | 83  | Chinese cohorts | MAG | human body | oral cavity |
| RSZAXPI002682-32_RA_saliva.metaspades.bin.12  | CNA0070243 | 97.67 | 0    | 43.65 | 91.52 | TRUE | 643,076   | 706  | 665  | 48  | Chinese cohorts | MAG | human body | oral cavity |
| SZAXPI011699-166_RA_dental.metaspades.bin.36  | CNA0071113 | 90.7  | 0    | 47.10 | 90.99 | TRUE | 1,015,644 | 1092 | 1048 | 49  | Chinese cohorts | MAG | human body | oral cavity |
| SZAXPI011699-166_RA_dental.metaspades.bin.38  | CNA0071117 | 97.67 | 0    | 37.62 | 91.30 | TRUE | 698,284   | 730  | 693  | 21  | Chinese cohorts | MAG | human body | oral cavity |
| SZAXPI011699-166_RA_dental.metaspades.bin.58  | CNA0071120 | 93.02 | 0    | 38.43 | 89.76 | TRUE | 667,005   | 658  | 613  | 45  | Chinese cohorts | MAG | human body | oral cavity |
| SZAXPI018092-13_RA_dental.metaspades.bin.42   | CNA0071123 | 95.35 | 2.33 | 47.49 | 90.74 | TRUE | 763,478   | 804  | 758  | 31  | Chinese cohorts | MAG | human body | oral cavity |
| SZAXPI018092-13_RA_dental.metaspades.bin.61   | CNA0071126 | 97.67 | 4.65 | 47.29 | 91.97 | TRUE | 999,034   | 1046 | 1005 | 18  | Chinese cohorts | MAG | human body | oral cavity |
| SZAXPI018093-14_RA_dental.metaspades.bin.39   | CNA0071129 | 100   | 0    | 38.00 | 90.91 | TRUE | 751,036   | 775  | 733  | 12  | Chinese cohorts | MAG | human body | oral cavity |
| SZAXPI018094-15_RA_dental.metaspades.bin.29   | CNA0071132 | 93.02 | 0    | 50.84 | 88.89 | TRUE | 710,743   | 683  | 637  | 15  | Chinese cohorts | MAG | human body | oral cavity |
| SZAXPI018095-16_RA_dental.metaspades.bin.15   | CNA0071135 | 97.67 | 0    | 33.94 | 89.67 | TRUE | 748,394   | 772  | 734  | 2   | Chinese cohorts | MAG | human body | oral cavity |
| SZAXPI018096-17_RA_dental.metaspades.bin.23   | CNA0071138 | 93.02 | 0    | 52.26 | 85.58 | TRUE | 934,887   | 952  | 915  | 84  | Chinese cohorts | MAG | human body | oral cavity |
| SZAXPI018096-17_RA_dental.metaspades.bin.34   | CNA0071141 | 90.7  | 0    | 37.68 | 91.17 | TRUE | 671,975   | 674  | 647  | 5   | Chinese cohorts | MAG | human body | oral cavity |
| SZAXPI018096-17_RA_dental.metaspades.bin.59   | CNA0071144 | 97.67 | 0    | 33.88 | 90.04 | TRUE | 706,983   | 714  | 678  | 16  | Chinese cohorts | MAG | human body | oral cavity |
| SZAXPI018096-17_RA_dental.metaspades.bin.67   | CNA0071146 | 93.02 | 2.33 | 50.76 | 88.85 | TRUE | 736,123   | 690  | 646  | 44  | Chinese cohorts | MAG | human body | oral cavity |
| SZAXPI018096-17_RA_dental.metaspades.bin.7    | CNA0071149 | 100   | 2.33 | 48.88 | 90.42 | TRUE | 869,994   | 906  | 862  | 15  | Chinese cohorts | MAG | human body | oral cavity |
| SZAXPI018097-18_RA_dental.metaspades.bin.14   | CNA0071152 | 97.67 | 0    | 38.20 | 89.25 | TRUE | 741,287   | 722  | 674  | 4   | Chinese cohorts | MAG | human body | oral cavity |
| SZAXPI018097-18_RA_dental.metaspades.bin.33   | CNA0071156 | 100   | 2.33 | 38.14 | 90.10 | TRUE | 831,180   | 864  | 820  | 4   | Chinese cohorts | MAG | human body | oral cavity |
| SZAXPI018097-18_RA_dental.metaspades.bin.87   | CNA0071160 | 97.67 | 0    | 50.72 | 88.66 | TRUE | 796,198   | 752  | 704  | 18  | Chinese cohorts | MAG | human body | oral cavity |
| SZAXPI018098-19_RA_dental.metaspades.bin.53   | CNA0071163 | 90.7  | 0    | 47.51 | 91.02 | TRUE | 779,385   | 829  | 789  | 9   | Chinese cohorts | MAG | human body | oral cavity |
| SZAXPI018098-19_RA_dental.metaspades.bin.54   | CNA0071166 | 100   | 0    | 37.56 | 90.88 | TRUE | 696,256   | 714  | 675  | 10  | Chinese cohorts | MAG | human body | oral cavity |
| SZAXPI018099-20_RA_dental.metaspades.bin.40   | CNA0071169 | 97.67 | 0    | 37.88 | 90.11 | TRUE | 688,806   | 703  | 667  | 12  | Chinese cohorts | MAG | human body | oral cavity |
| SZAXPI018101-22_RA_dental.metaspades.bin.22   | CNA0071172 | 100   | 2.33 | 38.01 | 90.59 | TRUE | 752,182   | 787  | 752  | 11  | Chinese cohorts | MAG | human body | oral cavity |
| SZAXPI018101-22_RA_dental.metaspades.bin.26   | CNA0071174 | 100   | 2.33 | 47.11 | 90.38 | TRUE | 965,177   | 1012 | 963  | 42  | Chinese cohorts | MAG | human body | oral cavity |
| SZAXPI018101-22_RA_dental.metaspades.bin.8    | CNA0071177 | 97.67 | 0    | 33.96 | 89.41 | TRUE | 693,060   | 682  | 651  | 42  | Chinese cohorts | MAG | human body | oral cavity |
| SZAXPI018102-23_RA_dental.metaspades.bin.20   | CNA0071181 | 100   | 0    | 51.59 | 85.04 | TRUE | 1,052,333 | 1093 | 1047 | 8   | Chinese cohorts | MAG | human body | oral cavity |
| SZAXPI018103-24_RA_dental.metaspades.bin.40   | CNA0071184 | 93.02 | 2.33 | 42.37 | 90.51 | TRUE | 694,830   | 714  | 680  | 62  | Chinese cohorts | MAG | human body | oral cavity |
| SZAXPI018103-24_RA_dental.metaspades.bin.45   | CNA0071188 | 100   | 0    | 39.67 | 89.54 | TRUE | 758,497   | 758  | 709  | 6   | Chinese cohorts | MAG | human body | oral cavity |
| SZAXPI018103-24_RA_dental.metaspades.bin.52   | CNA0071191 | 100   | 0    | 37.94 | 91.09 | TRUE | 740,157   | 762  | 725  | 11  | Chinese cohorts | MAG | human body | oral cavity |
| SZAXPI018103-24_RA_dental.metaspades.bin.59   | CNA0071195 | 97.67 | 0    | 33.85 | 89.45 | TRUE | 724,276   | 731  | 694  | 26  | Chinese cohorts | MAG | human body | oral cavity |
| SZAXPI018171-25_1_RA_dental.metaspades.bin.23 | CNA0071198 | 100   | 0    | 38.35 | 90.61 | TRUE | 829,482   | 856  | 813  | 9   | Chinese cohorts | MAG | human body | oral cavity |
| SZAXPI018171-25_1_RA_dental.metaspades.bin.52 | CNA0071202 | 95.35 | 4.65 | 47.42 | 91.55 | TRUE | 804,267   | 855  | 815  | 47  | Chinese cohorts | MAG | human body | oral cavity |
| SZAXPI018171-25_1_RA_dental.metaspades.bin.5  | CNA0071205 | 95.35 | 2.33 | 38.11 | 89.54 | TRUE | 755,225   | 757  | 710  | 26  | Chinese cohorts | MAG | human body | oral cavity |
| SZAXPI018171-25_1_RA_dental.metaspades.bin.83 | CNA0071208 | 100   | 0    | 50.43 | 89.56 | TRUE | 834,453   | 767  | 719  | 12  | Chinese cohorts | MAG | human body | oral cavity |
| SZAXPI018172-26_RA_dental.metaspades.bin.32   | CNA0071212 | 100   | 0    | 52.38 | 85.56 | TRUE | 990,980   | 1014 | 969  | 7   | Chinese cohorts | MAG | human body | oral cavity |
| SZAXPI018172-26_RA_dental.metaspades.bin.42   | CNA0071215 | 100   | 0    | 37.50 | 91.10 | TRUE | 608,967   | 623  | 590  | 9   | Chinese cohorts | MAG | human body | oral cavity |
| SZAXPI018173-27_RA_dental.metaspades.bin.20   | CNA0071219 | 93.02 | 0    | 38.23 | 90.54 | TRUE | 759,722   | 785  | 747  | 42  | Chinese cohorts | MAG | human body | oral cavity |
| SZAXPI018174-30_RA_dental.metaspades.bin.36   | CNA0071222 | 93.02 | 2.33 | 51.75 | 92.08 | TRUE | 888,184   | 947  | 906  | 12  | Chinese cohorts | MAG | human body | oral cavity |
| SZAXPI018176-32_RA_dental.metaspades.bin.12   | CNA0071225 | 100   | 2.33 | 47.74 | 90.79 | TRUE | 920,725   | 994  | 947  | 14  | Chinese cohorts | MAG | human body | oral cavity |
| SZAXPI018177-33_RA_dental.metaspades.bin.61   | CNA0071229 | 100   | 0    | 51.01 | 91.47 | TRUE | 827,183   | 879  | 835  | 5   | Chinese cohorts | MAG | human body | oral cavity |
| SZAXPI018178-34_RA_dental.metaspades.bin.15   | CNA0071232 | 97.67 | 0    | 38.25 | 89.50 | TRUE | 737,131   | 731  | 684  | 1   | Chinese cohorts | MAG | human body | oral cavity |
| SZAXPI018178-34_RA_dental.metaspades.bin.52   | CNA0071235 | 93.02 | 0    | 50.86 | 89.19 | TRUE | 759,776   | 700  | 655  | 77  | Chinese cohorts | MAG | human body | oral cavity |
| SZAXPI018178-34_RA_dental.metaspades.bin.62   | CNA0071238 | 93.02 | 0    | 34.11 | 90.31 | TRUE | 654,052   | 647  | 615  | 115 | Chinese cohorts | MAG | human body | oral cavity |



|                                              |            |       |      |       |       |      |           |      |      |    |                 |     |            |             |
|----------------------------------------------|------------|-------|------|-------|-------|------|-----------|------|------|----|-----------------|-----|------------|-------------|
| SZAXPI018180-36_RA_dental.metaspades.bin.18  | CNA0071241 | 100   | 0    | 38.48 | 90.22 | TRUE | 847,906   | 886  | 842  | 6  | Chinese cohorts | MAG | human body | oral cavity |
| SZAXPI018180-36_RA_dental.metaspades.bin.4   | CNA0071244 | 97.67 | 2.33 | 47.61 | 90.95 | TRUE | 805,037   | 864  | 822  | 74 | Chinese cohorts | MAG | human body | oral cavity |
| SZAXPI018181-37_RA_dental.metaspades.bin.31  | CNA0071247 | 100   | 0    | 47.25 | 91.37 | TRUE | 911,478   | 973  | 926  | 25 | Chinese cohorts | MAG | human body | oral cavity |
| SZAXPI018181-37_RA_dental.metaspades.bin.33  | CNA0071250 | 97.67 | 0    | 50.08 | 89.54 | TRUE | 858,528   | 799  | 751  | 13 | Chinese cohorts | MAG | human body | oral cavity |
| SZAXPI018182-39_RA_dental.metaspades.bin.37  | CNA0071253 | 97.67 | 0    | 37.80 | 90.71 | TRUE | 673,569   | 685  | 649  | 8  | Chinese cohorts | MAG | human body | oral cavity |
| SZAXPI018184-41_RA_dental.metaspades.bin.37  | CNA0071256 | 100   | 0    | 52.41 | 85.35 | TRUE | 1,026,525 | 1037 | 988  | 13 | Chinese cohorts | MAG | human body | oral cavity |
| SZAXPI018187-45_RA_dental.metaspades.bin.28  | CNA0071260 | 100   | 0    | 51.66 | 85.05 | TRUE | 1,060,344 | 1082 | 1032 | 16 | Chinese cohorts | MAG | human body | oral cavity |
| SZAXPI018188-46_RA_dental.metaspades.bin.49  | CNA0071263 | 100   | 0    | 51.24 | 85.62 | TRUE | 1,066,003 | 1111 | 1065 | 20 | Chinese cohorts | MAG | human body | oral cavity |
| SZAXPI018189-47_RA_dental.metaspades.bin.40  | CNA0071266 | 93.02 | 0    | 47.66 | 92.04 | TRUE | 772,288   | 820  | 779  | 24 | Chinese cohorts | MAG | human body | oral cavity |
| SZAXPI018189-47_RA_dental.metaspades.bin.68  | CNA0071269 | 100   | 0    | 37.95 | 91.05 | TRUE | 744,018   | 781  | 741  | 12 | Chinese cohorts | MAG | human body | oral cavity |
| SZAXPI018190-56_RA_dental.metaspades.bin.33  | CNA0071272 | 100   | 0    | 38.65 | 90.12 | TRUE | 893,731   | 905  | 861  | 18 | Chinese cohorts | MAG | human body | oral cavity |
| SZAXPI018190-56_RA_dental.metaspades.bin.44  | CNA0071275 | 95.35 | 2.33 | 47.09 | 87.52 | TRUE | 851,029   | 890  | 853  | 42 | Chinese cohorts | MAG | human body | oral cavity |
| SZAXPI018190-56_RA_dental.metaspades.bin.64  | CNA0071279 | 97.67 | 0    | 33.96 | 89.67 | TRUE | 723,020   | 727  | 687  | 19 | Chinese cohorts | MAG | human body | oral cavity |
| SZAXPI018191-57_RA_dental.metaspades.bin.32  | CNA0071282 | 97.67 | 0    | 34.49 | 89.78 | TRUE | 743,694   | 746  | 708  | 7  | Chinese cohorts | MAG | human body | oral cavity |
| SZAXPI018191-57_RA_dental.metaspades.bin.69  | CNA0071285 | 97.67 | 0    | 37.89 | 90.89 | TRUE | 739,369   | 767  | 729  | 23 | Chinese cohorts | MAG | human body | oral cavity |
| SZAXPI018271-62_RA_dental.metaspades.bin.3   | CNA0071288 | 100   | 2.33 | 47.77 | 91.62 | TRUE | 786,725   | 847  | 811  | 24 | Chinese cohorts | MAG | human body | oral cavity |
| SZAXPI018271-62_RA_dental.metaspades.bin.80  | CNA0071291 | 97.67 | 0    | 37.76 | 91.49 | TRUE | 697,774   | 722  | 682  | 15 | Chinese cohorts | MAG | human body | oral cavity |
| SZAXPI018272-74_RA_dental.metaspades.bin.18  | CNA0071294 | 100   | 0    | 37.82 | 90.80 | TRUE | 718,161   | 741  | 700  | 10 | Chinese cohorts | MAG | human body | oral cavity |
| SZAXPI018273-75_RA_dental.metaspades.bin.22  | CNA0071297 | 93.02 | 0    | 37.43 | 91.38 | TRUE | 655,845   | 662  | 631  | 11 | Chinese cohorts | MAG | human body | oral cavity |
| SZAXPI018273-75_RA_dental.metaspades.bin.34  | CNA0071300 | 97.67 | 0    | 40.25 | 89.15 | TRUE | 820,110   | 793  | 743  | 13 | Chinese cohorts | MAG | human body | oral cavity |
| SZAXPI018274-87_RA_dental.metaspades.bin.42  | CNA0071304 | 97.67 | 0    | 37.63 | 90.91 | TRUE | 666,840   | 677  | 637  | 8  | Chinese cohorts | MAG | human body | oral cavity |
| SZAXPI018274-87_RA_dental.metaspades.bin.66  | CNA0071306 | 95.35 | 4.65 | 50.83 | 89.72 | TRUE | 794,648   | 731  | 690  | 54 | Chinese cohorts | MAG | human body | oral cavity |
| SZAXPI018275-88_RA_dental.metaspades.bin.38  | CNA0071309 | 95.35 | 2.33 | 49.34 | 90.58 | TRUE | 803,613   | 841  | 799  | 18 | Chinese cohorts | MAG | human body | oral cavity |
| SZAXPI018275-88_RA_dental.metaspades.bin.49  | CNA0071312 | 97.67 | 0    | 37.83 | 91.10 | TRUE | 707,144   | 729  | 689  | 14 | Chinese cohorts | MAG | human body | oral cavity |
| SZAXPI018275-88_RA_dental.metaspades.bin.50  | CNA0071315 | 93.02 | 0    | 34.04 | 89.59 | TRUE | 677,931   | 695  | 663  | 79 | Chinese cohorts | MAG | human body | oral cavity |
| SZAXPI018276-89_RA_dental.metaspades.bin.7   | CNA0071318 | 100   | 0    | 38.22 | 90.21 | TRUE | 812,685   | 843  | 798  | 7  | Chinese cohorts | MAG | human body | oral cavity |
| SZAXPI018277-90_RA_dental.metaspades.bin.26  | CNA0071321 | 97.67 | 0    | 38.12 | 90.82 | TRUE | 780,071   | 806  | 766  | 11 | Chinese cohorts | MAG | human body | oral cavity |
| SZAXPI018277-90_RA_dental.metaspades.bin.45  | CNA0071324 | 97.67 | 4.65 | 48.13 | 92.43 | TRUE | 820,526   | 876  | 836  | 62 | Chinese cohorts | MAG | human body | oral cavity |
| SZAXPI018277-90_RA_dental.metaspades.bin.77  | CNA0071327 | 97.67 | 0    | 38.15 | 89.62 | TRUE | 727,796   | 707  | 660  | 4  | Chinese cohorts | MAG | human body | oral cavity |
| SZAXPI018278-93_RA_dental.metaspades.bin.39  | CNA0071330 | 97.67 | 0    | 41.19 | 89.16 | TRUE | 820,079   | 799  | 750  | 14 | Chinese cohorts | MAG | human body | oral cavity |
| SZAXPI018278-93_RA_dental.metaspades.bin.41  | CNA0071333 | 100   | 0    | 44.68 | 92.51 | TRUE | 723,807   | 778  | 734  | 21 | Chinese cohorts | MAG | human body | oral cavity |
| SZAXPI018279-94_RA_dental.metaspades.bin.16  | CNA0071337 | 90.7  | 0    | 50.58 | 90.32 | TRUE | 715,829   | 686  | 646  | 68 | Chinese cohorts | MAG | human body | oral cavity |
| SZAXPI018279-94_RA_dental.metaspades.bin.46  | CNA0071340 | 100   | 0    | 38.21 | 90.61 | TRUE | 822,559   | 856  | 812  | 1  | Chinese cohorts | MAG | human body | oral cavity |
| SZAXPI018280-95_RA_dental.metaspades.bin.19  | CNA0071343 | 100   | 0    | 35.18 | 89.94 | TRUE | 643,092   | 661  | 619  | 2  | Chinese cohorts | MAG | human body | oral cavity |
| SZAXPI018280-95_RA_dental.metaspades.bin.20  | CNA0071346 | 100   | 0    | 51.58 | 85.76 | TRUE | 1,045,767 | 1080 | 1038 | 6  | Chinese cohorts | MAG | human body | oral cavity |
| SZAXPI018280-95_RA_dental.metaspades.bin.36  | CNA0071349 | 97.67 | 2.33 | 48.11 | 91.73 | TRUE | 757,009   | 796  | 753  | 35 | Chinese cohorts | MAG | human body | oral cavity |
| SZAXPI018281-102_RA_dental.metaspades.bin.20 | CNA0071353 | 100   | 0    | 51.96 | 85.67 | TRUE | 993,789   | 1021 | 974  | 4  | Chinese cohorts | MAG | human body | oral cavity |
| SZAXPI018282-108_RA_dental.metaspades.bin.30 | CNA0071356 | 97.67 | 0    | 38.04 | 91.01 | TRUE | 772,054   | 788  | 747  | 5  | Chinese cohorts | MAG | human body | oral cavity |
| SZAXPI018282-108_RA_dental.metaspades.bin.67 | CNA0071360 | 97.67 | 0    | 38.33 | 89.64 | TRUE | 722,056   | 713  | 666  | 2  | Chinese cohorts | MAG | human body | oral cavity |
| SZAXPI018282-108_RA_dental.metaspades.bin.70 | CNA0071363 | 97.67 | 0    | 50.82 | 89.18 | TRUE | 775,389   | 728  | 682  | 9  | Chinese cohorts | MAG | human body | oral cavity |
| SZAXPI018283-109_RA_dental.metaspades.bin.24 | CNA0071366 | 100   | 2.33 | 47.13 | 91.23 | TRUE | 870,079   | 940  | 903  | 18 | Chinese cohorts | MAG | human body | oral cavity |
| SZAXPI018284-111_RA_dental.metaspades.bin.3  | CNA0071369 | 97.67 | 0    | 50.76 | 89.30 | TRUE | 799,972   | 752  | 706  | 40 | Chinese cohorts | MAG | human body | oral cavity |
| SZAXPI018284-111_RA_dental.metaspades.bin.60 | CNA0071372 | 93.02 | 0    | 47.45 | 91.20 | TRUE | 847,827   | 901  | 850  | 6  | Chinese cohorts | MAG | human body | oral cavity |
| SZAXPI018285-113_RA_dental.metaspades.bin.57 | CNA0071375 | 97.67 | 0    | 51.22 | 85.36 | TRUE | 1,057,451 | 1094 | 1050 | 17 | Chinese cohorts | MAG | human body | oral cavity |
| SZAXPI018286-123_RA_dental.metaspades.bin.12 | CNA0071378 | 90.7  | 2.33 | 47.42 | 91.32 | TRUE | 803,305   | 866  | 822  | 21 | Chinese cohorts | MAG | human body | oral cavity |
| SZAXPI018286-123_RA_dental.metaspades.bin.16 | CNA0071381 | 97.67 | 0    | 38.12 | 89.25 | TRUE | 736,281   | 712  | 665  | 3  | Chinese cohorts | MAG | human body | oral cavity |
| SZAXPI018286-123_RA_dental.metaspades.bin.45 | CNA0071383 | 100   | 0    | 36.99 | 90.29 | TRUE | 633,506   | 663  | 621  | 6  | Chinese cohorts | MAG | human body | oral cavity |
| SZAXPI018286-123_RA_dental.metaspades.bin.62 | CNA0071386 | 100   | 2.33 | 47.55 | 91.42 | TRUE | 849,267   | 890  | 844  | 3  | Chinese cohorts | MAG | human body | oral cavity |
| SZAXPI018286-123_RA_dental.metaspades.bin.63 | CNA0071389 | 97.67 | 0    | 37.87 | 91.07 | TRUE | 735,219   | 751  | 711  | 18 | Chinese cohorts | MAG | human body | oral cavity |
| SZAXPI018286-123_RA_dental.metaspades.bin.94 | CNA0071392 | 95.35 | 0    | 36.77 | 89.93 | TRUE | 636,881   | 622  | 584  | 47 | Chinese cohorts | MAG | human body | oral cavity |
| SZAXPI018287-129_RA_dental.metaspades.bin.14 | CNA0071395 | 97.67 | 0    | 33.96 | 89.67 | TRUE | 721,284   | 722  | 683  | 8  | Chinese cohorts | MAG | human body | oral cavity |
| SZAXPI018287-129_RA_dental.metaspades.bin.24 | CNA0071398 | 100   | 0    | 52.35 | 86.23 | TRUE | 1,001,910 | 1040 | 998  | 8  | Chinese cohorts | MAG | human body | oral cavity |
| SZAXPI018287-129_RA_dental.metaspades.bin.34 | CNA0071401 | 100   | 2.33 | 49.57 | 91.16 | TRUE | 811,843   | 839  | 797  | 10 | Chinese cohorts | MAG | human body | oral cavity |
| SZAXPI018287-129_RA_dental.metaspades.bin.69 | CNA0071403 | 100   | 2.33 | 37.85 | 91.47 | TRUE | 728,951   | 745  | 708  | 40 | Chinese cohorts | MAG | human body | oral cavity |
| SZAXPI018288-133_RA_dental.metaspades.bin.36 | CNA0071406 | 100   | 0    | 38.12 | 90.74 | TRUE | 828,892   | 855  | 814  | 6  | Chinese cohorts | MAG | human body | oral cavity |
| SZAXPI018288-133_RA_dental.metaspades.bin.4  | CNA0071409 | 100   | 0    | 52.17 | 86.19 | TRUE | 1,044,509 | 1077 | 1034 | 6  | Chinese cohorts | MAG | human body | oral cavity |
| SZAXPI018288-133_RA_dental.metaspades.bin.72 | CNA0071412 | 100   | 2.33 | 49.15 | 90.06 | TRUE | 799,512   | 824  | 778  | 20 | Chinese cohorts | MAG | human body | oral cavity |
| SZAXPI018291-142_RA_dental.metaspades.bin.25 | CNA0071415 | 100   | 2.33 | 38.06 | 90.87 | TRUE | 806,339   | 823  | 783  | 52 | Chinese cohorts | MAG | human body | oral cavity |
| SZAXPI018291-142_RA_dental.metaspades.bin.37 | CNA0071419 | 95.35 | 0    | 52.17 | 85.55 | TRUE | 943,634   | 979  | 938  | 59 | Chinese cohorts | MAG | human body | oral cavity |
| SZAXPI018292-158_RA_dental.metaspades.bin.12 | CNA0071422 | 93.02 | 0    | 37.98 | 90.41 | TRUE | 636,953   | 658  | 622  | 11 | Chinese cohorts | MAG | human body | oral cavity |
| SZAXPI018292-158_RA_dental.metaspades.bin.62 | CNA0071425 | 95.35 | 4.65 | 48.04 | 91.50 | TRUE | 851,409   | 880  | 837  | 73 | Chinese cohorts | MAG | human body | oral cavity |
| SZAXPI018302-84_RA_dental.metaspades.bin.17  | CNA0071428 | 100   | 4.65 | 47.99 | 90.93 | TRUE | 839,242   | 890  | 844  | 25 | Chinese cohorts | MAG | human body | oral cavity |
| SZAXPI018309-166_RA_dental.metaspades.bin.21 | CNA0071431 | 93.02 | 2.33 | 49.27 | 91.08 | TRUE | 802,563   | 826  | 788  | 77 | Chinese cohorts | MAG | human body | oral cavity |
| SZAXPI018310-169_RA_dental.metaspades.bin.1  | CNA0071433 | 97.67 | 0    | 37.38 | 90.79 | TRUE | 634,733   | 646  | 611  | 7  | Chinese cohorts | MAG | human body | oral cavity |
| SZAXPI018312-14_RA_dental.metaspades.bin.43  | CNA0071436 | 97.67 | 0    | 33.98 | 89.03 | TRUE | 766,267   | 775  | 734  | 58 | Chinese cohorts | MAG | human body | oral cavity |
| SZAXPI018312-14_RA_dental.metaspades.bin.62  | CNA0071439 | 95.35 | 0    | 39.65 | 90.07 | TRUE | 754,255   | 754  | 711  | 13 | Chinese cohorts | MAG | human body | oral cavity |
| SZAXPI018312-14_RA_dental.metaspades.bin.67  | CNA0071442 | 97.67 | 0    | 42.31 | 90.50 | TRUE | 763,505   | 767  | 727  | 22 | Chinese cohorts | MAG | human body | oral cavity |
| SZAXPI018312-14_RA_dental.metaspades.bin.87  | CNA0071445 | 95.35 | 2.33 | 37.93 | 90.16 | TRUE | 788,922   | 801  | 760  | 65 | Chinese cohorts | MAG | human body | oral cavity |
| SZAXPI018313-15_RA_dental.metaspades.bin.16  | CNA0071448 | 97.67 | 0    | 34.09 | 89.59 | TRUE | 735,857   | 744  | 705  | 8  | Chinese cohorts | MAG | human body | oral cavity |
| SZAXPI018313-15_RA_dental.metaspades.bin.43  | CNA0071451 | 97.67 | 0    | 50.57 | 89.21 | TRUE | 840,490   | 793  | 744  | 54 | Chinese cohorts | MAG | human body | oral cavity |
| SZAXPI018315-17_RA_dental.metaspades.bin.12  | CNA0071454 | 100   | 0    | 51.43 | 85.25 | TRUE | 1,079,263 | 1114 | 1070 | 12 | Chinese cohorts | MAG | human body | oral cavity |
| SZAXPI018315-17_RA_dental.metaspades.bin.21  | CNA0071457 | 100   | 0    | 37.08 | 91.00 | TRUE | 645,428   | 681  | 643  | 6  | Chinese cohorts | MAG | human body | oral cavity |
| SZAXPI018315-17_RA_dental.metaspades.bin.58  | CNA0071460 | 100   | 0    | 38.17 | 90.58 | TRUE | 818,552   | 846  | 806  | 6  | Chinese cohorts | MAG | human body | oral cavity |
| SZAXPI018316-18_RA_dental.metaspades.bin.5   | CNA0071463 | 100   | 0    | 52.20 | 85.37 | TRUE | 1,097,718 | 1140 | 1091 | 9  | Chinese cohorts | MAG | human body | oral cavity |
| SZAXPI018317-19_RA_dental.metaspades.bin.31  | CNA0071466 | 100   | 4.65 | 41.94 | 92.54 | TRUE | 690,562   | 734  | 693  | 12 | Chinese cohorts | MAG | human body | oral cavity |
| SZAXPI018317-19_RA_dental.metaspades.bin.46  | CNA0071470 | 95.35 | 2.33 | 51.61 | 90.13 | TRUE | 905,612   | 965  | 918  | 28 | Chinese cohorts | MAG | human body | oral cavity |
| SZAXPI018317-19_RA_dental.metaspades.bin.4   | CNA0071472 | 100   | 0    | 37.85 | 90.79 | TRUE | 794,396   | 818  | 774  | 36 | Chinese cohorts | MAG | human body | oral cavity |
| SZAXPI018317-19_RA_dental.metaspades.bin.69  | CNA0071475 | 100   | 0    | 37.39 | 91.17 | TRUE | 610,053   | 628  | 588  | 2  | Chinese cohorts | MAG | human body | oral cavity |
| SZAXPI018317-19_RA_dental.metaspades.bin.70  | CNA0071478 | 97.67 | 0    | 33.89 | 89.29 | TRUE | 733,476   | 732  | 693  | 16 | Chinese cohorts | MAG | human body | oral cavity |
| SZAXPI018318-20_RA_dental.metaspades.bin.22  | CNA0071481 | 100   | 0    | 35.61 | 90.26 | TRUE | 666,118   | 703  | 662  | 5  | Chinese cohorts | MAG | human body | oral cavity |
| SZAXPI018318-20_RA_dental.metaspades.bin.38  | CNA0071484 | 100   | 0    | 38.41 | 90.80 | TRUE | 825,893   | 862  | 816  | 3  | Chinese cohorts | MAG | human body | oral cavity |

|                                                |            |       |      |       |       |      |           |      |      |     |                 |     |            |             |
|------------------------------------------------|------------|-------|------|-------|-------|------|-----------|------|------|-----|-----------------|-----|------------|-------------|
| SZAXPI018318-20_RA_dental.metaspades.bin.6     | CNA0071487 | 97.67 | 0    | 51.86 | 85.75 | TRUE | 1,063,498 | 1095 | 1051 | 30  | Chinese cohorts | MAG | human body | oral cavity |
| SZAXPI018320-22_RA_dental.metaspades.bin.15    | CNA0071490 | 97.67 | 0    | 37.69 | 91.16 | TRUE | 660,035   | 675  | 642  | 9   | Chinese cohorts | MAG | human body | oral cavity |
| SZAXPI018320-22_RA_dental.metaspades.bin.16    | CNA0071493 | 100   | 2.33 | 47.83 | 91.28 | TRUE | 851,192   | 908  | 864  | 7   | Chinese cohorts | MAG | human body | oral cavity |
| SZAXPI018320-22_RA_dental.metaspades.bin.29    | CNA0071495 | 97.67 | 0    | 33.98 | 89.37 | TRUE | 736,138   | 732  | 690  | 5   | Chinese cohorts | MAG | human body | oral cavity |
| SZAXPI018320-22_RA_dental.metaspades.bin.9     | CNA0071498 | 95.35 | 4.65 | 51.02 | 89.22 | TRUE | 724,675   | 675  | 632  | 59  | Chinese cohorts | MAG | human body | oral cavity |
| SZAXPI018322-24_RA_dental.metaspades.bin.11    | CNA0071500 | 100   | 2.33 | 39.89 | 89.01 | TRUE | 763,452   | 735  | 688  | 61  | Chinese cohorts | MAG | human body | oral cavity |
| SZAXPI018322-24_RA_dental.metaspades.bin.44    | CNA0071502 | 100   | 4.65 | 48.89 | 90.22 | TRUE | 860,765   | 891  | 850  | 25  | Chinese cohorts | MAG | human body | oral cavity |
| SZAXPI018322-24_RA_dental.metaspades.bin.62    | CNA0071504 | 93.02 | 0    | 37.83 | 91.73 | TRUE | 657,812   | 683  | 654  | 9   | Chinese cohorts | MAG | human body | oral cavity |
| SZAXPI018323-25_RA_dental.metaspades.bin.25    | CNA0071506 | 93.02 | 0    | 40.02 | 89.61 | TRUE | 581,033   | 560  | 527  | 3   | Chinese cohorts | MAG | human body | oral cavity |
| SZAXPI018323-25_RA_dental.metaspades.bin.51    | CNA0071509 | 100   | 4.65 | 39.34 | 91.03 | TRUE | 902,654   | 933  | 886  | 10  | Chinese cohorts | MAG | human body | oral cavity |
| SZAXPI018323-25_RA_dental.metaspades.bin.7     | CNA0071511 | 100   | 4.65 | 46.76 | 90.50 | TRUE | 844,971   | 907  | 866  | 16  | Chinese cohorts | MAG | human body | oral cavity |
| SZAXPI018354-19_RA_saliva.metaspades.bin.2     | CNA0071513 | 95.35 | 4.65 | 50.68 | 90.06 | TRUE | 715,015   | 691  | 650  | 104 | Chinese cohorts | MAG | human body | oral cavity |
| SZAXPI018354-19_RA_saliva.metaspades.bin.46    | CNA0071515 | 100   | 0    | 36.39 | 90.71 | TRUE | 679,678   | 715  | 678  | 46  | Chinese cohorts | MAG | human body | oral cavity |
| SZAXPI018355-20_RA_saliva.metaspades.bin.45    | CNA0071518 | 90.7  | 0    | 50.97 | 90.45 | TRUE | 642,426   | 614  | 576  | 126 | Chinese cohorts | MAG | human body | oral cavity |
| SZAXPI018357-22_RA_saliva.metaspades.bin.38    | CNA0071520 | 93.02 | 0    | 50.66 | 90.30 | TRUE | 778,955   | 749  | 705  | 60  | Chinese cohorts | MAG | human body | oral cavity |
| SZAXPI018357-22_RA_saliva.metaspades.bin.71    | CNA0071522 | 97.67 | 0    | 54.12 | 90.58 | TRUE | 831,740   | 860  | 817  | 29  | Chinese cohorts | MAG | human body | oral cavity |
| SZAXPI018358-23_RA_saliva.metaspades.bin.53    | CNA0071523 | 100   | 0    | 40.95 | 89.28 | TRUE | 802,814   | 773  | 728  | 43  | Chinese cohorts | MAG | human body | oral cavity |
| SZAXPI018359-24_RA_saliva.metaspades.bin.78    | CNA0071524 | 100   | 0    | 35.70 | 90.39 | TRUE | 648,844   | 676  | 635  | 8   | Chinese cohorts | MAG | human body | oral cavity |
| SZAXPI018391-27_RA_saliva.metaspades.bin.47    | CNA0071525 | 95.35 | 0    | 41.19 | 88.66 | TRUE | 764,654   | 756  | 712  | 28  | Chinese cohorts | MAG | human body | oral cavity |
| SZAXPI018392-31_RA_saliva.metaspades.bin.11    | CNA0071526 | 95.35 | 2.33 | 43.12 | 91.23 | TRUE | 735,711   | 793  | 756  | 106 | Chinese cohorts | MAG | human body | oral cavity |
| SZAXPI018394-33_RA_saliva.metaspades.bin.17    | CNA0071527 | 97.67 | 0    | 40.74 | 89.37 | TRUE | 792,985   | 770  | 723  | 12  | Chinese cohorts | MAG | human body | oral cavity |
| SZAXPI018396-36_RA_saliva.metaspades.bin.56    | CNA0071528 | 95.35 | 0    | 50.78 | 88.60 | TRUE | 702,358   | 654  | 613  | 48  | Chinese cohorts | MAG | human body | oral cavity |
| SZAXPI018397-37_RA_saliva.metaspades.bin.18    | CNA0071529 | 97.67 | 0    | 41.20 | 88.78 | TRUE | 675,764   | 651  | 613  | 6   | Chinese cohorts | MAG | human body | oral cavity |
| SZAXPI018397-37_RA_saliva.metaspades.bin.28    | CNA0071530 | 100   | 0    | 36.35 | 91.06 | TRUE | 656,687   | 699  | 659  | 7   | Chinese cohorts | MAG | human body | oral cavity |
| SZAXPI018400-40_RA_saliva.metaspades.bin.35    | CNA0071531 | 97.67 | 0    | 43.32 | 91.59 | TRUE | 705,420   | 780  | 740  | 24  | Chinese cohorts | MAG | human body | oral cavity |
| SZAXPI018406-56_RA_saliva.metaspades.bin.70    | CNA0071532 | 97.67 | 0    | 43.38 | 91.83 | TRUE | 620,680   | 642  | 594  | 5   | Chinese cohorts | MAG | human body | oral cavity |
| SZAXPI018406-56_RA_saliva.metaspades.bin.71    | CNA0071533 | 95.35 | 0    | 40.96 | 89.93 | TRUE | 689,875   | 718  | 676  | 46  | Chinese cohorts | MAG | human body | oral cavity |
| SZAXPI018433-84_RA_saliva.metaspades.bin.87    | CNA0071534 | 100   | 0    | 36.28 | 90.99 | TRUE | 692,380   | 730  | 693  | 45  | Chinese cohorts | MAG | human body | oral cavity |
| SZAXPI018435-88_RA_saliva.metaspades.bin.58    | CNA0071535 | 93.02 | 0    | 50.74 | 89.38 | TRUE | 742,754   | 698  | 653  | 65  | Chinese cohorts | MAG | human body | oral cavity |
| SZAXPI018436-90_RA_saliva.metaspades.bin.9     | CNA0071536 | 90.7  | 2.33 | 36.36 | 90.47 | TRUE | 661,886   | 693  | 651  | 47  | Chinese cohorts | MAG | human body | oral cavity |
| SZAXPI018439-102_RA_saliva.metaspades.bin.34   | CNA0071537 | 100   | 2.33 | 40.25 | 89.85 | TRUE | 818,415   | 795  | 745  | 5   | Chinese cohorts | MAG | human body | oral cavity |
| SZAXPI018441-109_RA_saliva.metaspades.bin.47   | CNA0071538 | 95.35 | 2.33 | 47.46 | 91.75 | TRUE | 798,251   | 848  | 805  | 49  | Chinese cohorts | MAG | human body | oral cavity |
| SZAXPI018452-169_1_RA_saliva.metaspades.bin.16 | CNA0071539 | 100   | 0    | 35.48 | 89.67 | TRUE | 701,352   | 735  | 693  | 4   | Chinese cohorts | MAG | human body | oral cavity |
| SZAXPI018453-13_RA_saliva.metaspades.bin.39    | CNA0071540 | 97.67 | 0    | 43.88 | 90.72 | TRUE | 521,669   | 542  | 502  | 15  | Chinese cohorts | MAG | human body | oral cavity |
| SZAXPI018453-13_RA_saliva.metaspades.bin.65    | CNA0071541 | 100   | 0    | 35.60 | 89.90 | TRUE | 674,580   | 717  | 675  | 21  | Chinese cohorts | MAG | human body | oral cavity |
| SZAXPI018484-16_RA_saliva.metaspades.bin.36    | CNA0071542 | 93.02 | 4.65 | 37.11 | 90.79 | TRUE | 591,897   | 628  | 592  | 43  | Chinese cohorts | MAG | human body | oral cavity |
| SZAXPI018484-16_RA_saliva.metaspades.bin.48    | CNA0071543 | 95.35 | 4.65 | 43.60 | 92.40 | TRUE | 601,321   | 651  | 622  | 50  | Chinese cohorts | MAG | human body | oral cavity |
| SZAXPI018486-18_RA_saliva.metaspades.bin.17    | CNA0071544 | 97.67 | 2.33 | 43.26 | 91.11 | TRUE | 715,210   | 774  | 727  | 58  | Chinese cohorts | MAG | human body | oral cavity |
| SZAXPI018488-20_RA_saliva.metaspades.bin.49    | CNA0071545 | 97.67 | 4.65 | 51.67 | 90.23 | TRUE | 897,672   | 960  | 911  | 16  | Chinese cohorts | MAG | human body | oral cavity |
| SZAXPI018490-22_RA_saliva.metaspades.bin.30    | CNA0071546 | 100   | 0    | 36.41 | 90.16 | TRUE | 651,117   | 674  | 630  | 7   | Chinese cohorts | MAG | human body | oral cavity |
| SZAXPI018492-24_RA_saliva.metaspades.bin.47    | CNA0071547 | 93.02 | 4.65 | 40.85 | 89.14 | TRUE | 851,449   | 810  | 766  | 103 | Chinese cohorts | MAG | human body | oral cavity |
| SZAXPI018493-25_RA_saliva.metaspades.bin.44    | CNA0071548 | 100   | 0    | 40.22 | 89.71 | TRUE | 817,071   | 786  | 738  | 12  | Chinese cohorts | MAG | human body | oral cavity |
| RDPYD18075171_A_saliva.metaspades.bin.8        | CNA0069754 | 100   | 2.33 | 43.20 | 90.94 | TRUE | 750,645   | 835  | 787  | 81  | Chinese cohorts | MAG | human body | oral cavity |
| RDPYD18075172_A_saliva.metaspades.bin.27       | CNA0069755 | 95.35 | 4.65 | 43.65 | 92.47 | TRUE | 654,808   | 684  | 651  | 87  | Chinese cohorts | MAG | human body | oral cavity |
| RDPYD18088781_A_saliva.metaspades.bin.15       | CNA0069756 | 90.7  | 2.33 | 43.56 | 92.65 | TRUE | 555,279   | 589  | 565  | 128 | Chinese cohorts | MAG | human body | oral cavity |
| RDPYD18088792_A_saliva.metaspades.bin.66       | CNA0069757 | 93.02 | 0    | 43.40 | 91.58 | TRUE | 652,671   | 695  | 657  | 135 | Chinese cohorts | MAG | human body | oral cavity |
| RDPYD18088800_A_saliva.metaspades.bin.38       | CNA0069758 | 100   | 0    | 43.60 | 91.06 | TRUE | 674,054   | 722  | 681  | 6   | Chinese cohorts | MAG | human body | oral cavity |
| RDPYD18088805_A_saliva.metaspades.bin.25       | CNA0069759 | 100   | 0    | 36.00 | 89.91 | TRUE | 645,758   | 662  | 622  | 60  | Chinese cohorts | MAG | human body | oral cavity |
| RDPYD18088813_A_saliva.metaspades.bin.37       | CNA0069760 | 100   | 0    | 35.61 | 89.92 | TRUE | 676,706   | 714  | 673  | 6   | Chinese cohorts | MAG | human body | oral cavity |
| RDPYD18088830_A_saliva.metaspades.bin.38       | CNA0069761 | 100   | 0    | 42.95 | 91.76 | TRUE | 735,423   | 788  | 742  | 5   | Chinese cohorts | MAG | human body | oral cavity |
| RDPYD18088838_A_saliva.metaspades.bin.60       | CNA0069762 | 100   | 0    | 35.79 | 90.14 | TRUE | 679,777   | 722  | 682  | 5   | Chinese cohorts | MAG | human body | oral cavity |
| RDPYD18088951_A_saliva.metaspades.bin.87       | CNA0069763 | 95.35 | 0    | 41.39 | 89.30 | TRUE | 784,967   | 744  | 702  | 20  | Chinese cohorts | MAG | human body | oral cavity |
| RDPYD18088953_A_saliva.metaspades.bin.4        | CNA0069764 | 93.02 | 2.33 | 43.46 | 92.90 | TRUE | 610,809   | 651  | 617  | 133 | Chinese cohorts | MAG | human body | oral cavity |
| RDPYD18088954_A_saliva.metaspades.bin.47       | CNA0069765 | 100   | 0    | 35.66 | 90.27 | TRUE | 661,805   | 692  | 655  | 4   | Chinese cohorts | MAG | human body | oral cavity |
| RDPYD18088968_A_saliva.metaspades.bin.21       | CNA0069766 | 93.02 | 4.65 | 43.30 | 91.71 | TRUE | 655,051   | 710  | 675  | 164 | Chinese cohorts | MAG | human body | oral cavity |
| RDPYD18088975_A_saliva.metaspades.bin.3        | CNA0069767 | 97.67 | 0    | 35.44 | 89.68 | TRUE | 644,725   | 673  | 633  | 65  | Chinese cohorts | MAG | human body | oral cavity |
| RDPYD18088975_A_saliva.metaspades.bin.20       | CNA0069768 | 95.35 | 2.33 | 42.73 | 92.49 | TRUE | 647,765   | 680  | 651  | 158 | Chinese cohorts | MAG | human body | oral cavity |
| RDPYD18088979_A_saliva.metaspades.bin.8        | CNA0069769 | 97.67 | 0    | 40.83 | 89.09 | TRUE | 783,340   | 755  | 710  | 28  | Chinese cohorts | MAG | human body | oral cavity |
| RDPYD18088981_A_saliva.metaspades.bin.1        | CNA0069770 | 95.35 | 2.33 | 40.94 | 89.08 | TRUE | 743,779   | 733  | 691  | 49  | Chinese cohorts | MAG | human body | oral cavity |
| RDPYD18088981_A_saliva.metaspades.bin.41       | CNA0069771 | 100   | 0    | 42.89 | 91.89 | TRUE | 704,879   | 761  | 717  | 23  | Chinese cohorts | MAG | human body | oral cavity |
| RDPYD18088983_A_saliva.metaspades.bin.11       | CNA0069772 | 93.02 | 0    | 43.28 | 90.97 | TRUE | 688,868   | 725  | 679  | 113 | Chinese cohorts | MAG | human body | oral cavity |
| RDPYD18088984_A_saliva.metaspades.bin.13       | CNA0069773 | 95.35 | 2.33 | 43.66 | 92.81 | TRUE | 612,061   | 662  | 636  | 132 | Chinese cohorts | MAG | human body | oral cavity |
| RDPYD18088985_A_saliva.metaspades.bin.11       | CNA0069774 | 97.67 | 2.33 | 43.44 | 91.25 | TRUE | 717,364   | 766  | 720  | 52  | Chinese cohorts | MAG | human body | oral cavity |
| RDPYD18088987_A_saliva.metaspades.bin.6        | CNA0069775 | 95.35 | 4.65 | 43.48 | 90.97 | TRUE | 673,055   | 720  | 678  | 69  | Chinese cohorts | MAG | human body | oral cavity |
| RDPYD18088989_A_saliva.metaspades.bin.19       | CNA0069776 | 95.35 | 0    | 43.16 | 90.89 | TRUE | 711,290   | 774  | 729  | 51  | Chinese cohorts | MAG | human body | oral cavity |
| RDPYD18093589_A_saliva.metaspades.bin.27       | CNA0069777 | 90.7  | 2.33 | 43.78 | 93.54 | TRUE | 491,852   | 520  | 496  | 152 | Chinese cohorts | MAG | human body | oral cavity |
| RDPYD18189812_A_saliva.metaspades.bin.9        | CNA0069852 | 95.35 | 2.33 | 36.17 | 90.65 | TRUE | 619,505   | 638  | 601  | 101 | Chinese cohorts | MAG | human body | oral cavity |
| RDPYD18189828_A_saliva.metaspades.bin.6        | CNA0069853 | 97.67 | 0    | 43.46 | 91.72 | TRUE | 699,592   | 745  | 698  | 21  | Chinese cohorts | MAG | human body | oral cavity |
| RDPYD18189830_A_saliva.metaspades.bin.63       | CNA0069855 | 100   | 0    | 43.18 | 91.32 | TRUE | 729,420   | 785  | 739  | 9   | Chinese cohorts | MAG | human body | oral cavity |
| RDPYD18189833_A_saliva.metaspades.bin.38       | CNA0069856 | 100   | 0    | 42.72 | 91.64 | TRUE | 718,777   | 786  | 742  | 9   | Chinese cohorts | MAG | human body | oral cavity |
| RDPYD18189835_A_saliva.metaspades.bin.31       | CNA0069858 | 90.7  | 2.33 | 41.07 | 88.63 | TRUE | 738,449   | 721  | 676  | 37  | Chinese cohorts | MAG | human body | oral cavity |
| RDPYD18189836_A_saliva.metaspades.bin.24       | CNA0069859 | 100   | 0    | 43.32 | 90.79 | TRUE | 705,974   | 772  | 725  | 14  | Chinese cohorts | MAG | human body | oral cavity |
| RDPYD18189844_A_saliva.metaspades.bin.3        | CNA0069861 | 90.7  | 4.65 | 44.00 | 92.72 | TRUE | 556,492   | 596  | 573  | 159 | Chinese cohorts | MAG | human body | oral cavity |
| RDPYD18189848_A_saliva.metaspades.bin.20       | CNA0069862 | 100   | 0    | 43.60 | 91.07 | TRUE | 677,392   | 734  | 689  | 8   | Chinese cohorts | MAG | human body | oral cavity |
| RDPYD18189852_A_saliva.metaspades.bin.58       | CNA0069863 | 97.67 | 0    | 36.39 | 90.71 | TRUE | 651,887   | 669  | 634  | 46  | Chinese cohorts | MAG | human body | oral cavity |
| RDPYD18189853_A_saliva.metaspades.bin.43       | CNA0069865 | 93.02 | 2.33 | 43.77 | 92.10 | TRUE | 587,794   | 634  | 594  | 125 | Chinese cohorts | MAG | human body | oral cavity |
| RDPYD18189858_A_saliva.metaspades.bin.62       | CNA0069866 | 95.35 | 2.33 | 50.91 | 90.12 | TRUE | 749,988   | 691  | 651  | 151 | Chinese cohorts | MAG | human body | oral cavity |
| RDPYD18189858_A_saliva.metaspades.bin.8        | CNA0069868 | 100   | 2.33 | 43.82 | 92.51 | TRUE | 608,824   | 637  | 601  | 118 | Chinese cohorts | MAG | human body | oral cavity |
| RDPYD18189867_A_saliva.metaspades.bin.12       | CNA0069869 | 95.35 | 0    | 43.50 | 91.60 | TRUE | 672,400   | 720  | 674  | 70  | Chinese cohorts | MAG | human body | oral cavity |
| RDPYD18189868_A_saliva.metaspades.bin.61       | CNA0069871 | 90.7  | 0    | 43.76 | 93.11 | TRUE | 626,127   | 669  | 638  | 107 | Chinese cohorts | MAG | human body | oral cavity |
| RDPYD18189869_A_saliva.metaspades.bin.73       | CNA0069872 | 100   | 0    | 43.09 | 91.25 | TRUE | 745,963   | 803  | 757  | 10  | Chinese cohorts | MAG | human body | oral cavity |



|                                           |            |       |      |       |       |      |           |      |      |     |                 |     |            |             |
|-------------------------------------------|------------|-------|------|-------|-------|------|-----------|------|------|-----|-----------------|-----|------------|-------------|
| RDPYD18189874_A_saliva.metaspades.bin.36  | CNA0069874 | 97.67 | 0    | 42.88 | 92.01 | TRUE | 743,415   | 800  | 757  | 11  | Chinese cohorts | MAG | human body | oral cavity |
| RDPYD18189875_A_saliva.metaspades.bin.4   | CNA0069875 | 90.7  | 2.33 | 43.68 | 92.08 | TRUE | 569,939   | 591  | 562  | 126 | Chinese cohorts | MAG | human body | oral cavity |
| RDPYD18189879_A_saliva.metaspades.bin.66  | CNA0069876 | 97.67 | 0    | 44.05 | 92.87 | TRUE | 576,566   | 596  | 564  | 128 | Chinese cohorts | MAG | human body | oral cavity |
| RDPYD18189889_A_saliva.metaspades.bin.54  | CNA0069878 | 95.35 | 2.33 | 43.50 | 91.35 | TRUE | 620,610   | 668  | 627  | 145 | Chinese cohorts | MAG | human body | oral cavity |
| RDPYD18189898_A_saliva.metaspades.bin.76  | CNA0069879 | 97.67 | 0    | 43.50 | 91.12 | TRUE | 681,247   | 736  | 694  | 38  | Chinese cohorts | MAG | human body | oral cavity |
| RDPYD18189905_A_saliva.metaspades.bin.29  | CNA0069881 | 97.67 | 0    | 35.95 | 90.99 | TRUE | 649,114   | 689  | 650  | 8   | Chinese cohorts | MAG | human body | oral cavity |
| RDPYD18189907_A_saliva.metaspades.bin.26  | CNA0069882 | 93.02 | 2.33 | 43.61 | 92.02 | TRUE | 650,918   | 702  | 668  | 51  | Chinese cohorts | MAG | human body | oral cavity |
| RDPYD18189907_A_saliva.metaspades.bin.2   | CNA0069883 | 100   | 0    | 36.38 | 90.87 | TRUE | 640,670   | 665  | 625  | 36  | Chinese cohorts | MAG | human body | oral cavity |
| RDPYD18189913_A_saliva.metaspades.bin.17  | CNA0069885 | 93.02 | 2.33 | 43.24 | 92.21 | TRUE | 656,251   | 699  | 658  | 71  | Chinese cohorts | MAG | human body | oral cavity |
| RDPYD18189914_A_saliva.metaspades.bin.11  | CNA0069886 | 100   | 0    | 43.11 | 90.97 | TRUE | 717,889   | 774  | 728  | 11  | Chinese cohorts | MAG | human body | oral cavity |
| RDPYD18189916_A_saliva.metaspades.bin.45  | CNA0069888 | 95.35 | 2.33 | 43.46 | 91.58 | TRUE | 684,570   | 733  | 690  | 54  | Chinese cohorts | MAG | human body | oral cavity |
| RDPYD18189925_A_saliva.metaspades.bin.14  | CNA0069889 | 97.67 | 0    | 43.20 | 92.08 | TRUE | 737,131   | 788  | 743  | 60  | Chinese cohorts | MAG | human body | oral cavity |
| RDPYD18189930_A_saliva.metaspades.bin.8   | CNA0069890 | 100   | 2.33 | 43.18 | 91.81 | TRUE | 738,132   | 787  | 742  | 4   | Chinese cohorts | MAG | human body | oral cavity |
| RDPYD18189932_A_saliva.metaspades.bin.10  | CNA0069892 | 100   | 0    | 43.19 | 91.09 | TRUE | 699,337   | 761  | 716  | 32  | Chinese cohorts | MAG | human body | oral cavity |
| RDPYD18189957_A_saliva.metaspades.bin.89  | CNA0069893 | 95.35 | 4.65 | 42.93 | 92.44 | TRUE | 705,633   | 757  | 718  | 78  | Chinese cohorts | MAG | human body | oral cavity |
| RDPYD18189959_A_saliva.metaspades.bin.31  | CNA0069895 | 93.02 | 0    | 41.16 | 88.37 | TRUE | 626,016   | 638  | 597  | 101 | Chinese cohorts | MAG | human body | oral cavity |
| RDPYD18189960_A_saliva.metaspades.bin.21  | CNA0069896 | 93.02 | 2.33 | 41.30 | 89.60 | TRUE | 792,602   | 752  | 707  | 15  | Chinese cohorts | MAG | human body | oral cavity |
| RDPYD18189960_A_saliva.metaspades.bin.59  | CNA0069897 | 93.02 | 0    | 43.59 | 91.53 | TRUE | 614,222   | 654  | 628  | 85  | Chinese cohorts | MAG | human body | oral cavity |
| RDPYD18189965_A_saliva.metaspades.bin.61  | CNA0069899 | 100   | 0    | 35.64 | 90.03 | TRUE | 679,366   | 708  | 667  | 12  | Chinese cohorts | MAG | human body | oral cavity |
| RDPYD18189966_A_saliva.metaspades.bin.40  | CNA0069900 | 93.02 | 2.33 | 40.60 | 88.33 | TRUE | 658,303   | 643  | 595  | 48  | Chinese cohorts | MAG | human body | oral cavity |
| RDPYD18189988_A_saliva.metaspades.bin.51  | CNA0069902 | 100   | 0    | 43.43 | 91.42 | TRUE | 769,525   | 846  | 799  | 15  | Chinese cohorts | MAG | human body | oral cavity |
| RDPYD18300006_A_saliva.metaspades.bin.7   | CNA0069936 | 100   | 2.33 | 43.04 | 91.14 | TRUE | 755,309   | 805  | 756  | 35  | Chinese cohorts | MAG | human body | oral cavity |
| RDPYD18300014_A_saliva.metaspades.bin.15  | CNA0069938 | 90.7  | 0    | 44.01 | 92.82 | TRUE | 560,829   | 600  | 581  | 86  | Chinese cohorts | MAG | human body | oral cavity |
| RDPYD18300015_A_saliva.metaspades.bin.29  | CNA0069940 | 93.02 | 0    | 41.17 | 89.23 | TRUE | 637,656   | 650  | 615  | 95  | Chinese cohorts | MAG | human body | oral cavity |
| RDPYD18300017_A_saliva.metaspades.bin.20  | CNA0069941 | 100   | 0    | 43.22 | 91.89 | TRUE | 713,444   | 756  | 710  | 6   | Chinese cohorts | MAG | human body | oral cavity |
| RDPYD18300020_A_saliva.metaspades.bin.20  | CNA0069943 | 90.7  | 2.33 | 35.97 | 90.01 | TRUE | 660,298   | 708  | 668  | 79  | Chinese cohorts | MAG | human body | oral cavity |
| RDPYD18300036_A_saliva.metaspades.bin.53  | CNA0069944 | 93.02 | 2.33 | 40.89 | 87.36 | TRUE | 654,397   | 633  | 593  | 147 | Chinese cohorts | MAG | human body | oral cavity |
| RDPYD18300036_A_saliva.metaspades.bin.65  | CNA0069946 | 95.35 | 4.65 | 43.20 | 91.62 | TRUE | 806,590   | 879  | 832  | 68  | Chinese cohorts | MAG | human body | oral cavity |
| RDPYD18300059_A_saliva.metaspades.bin.13  | CNA0069947 | 90.7  | 0    | 52.41 | 85.77 | TRUE | 856,061   | 963  | 924  | 212 | Chinese cohorts | MAG | human body | oral cavity |
| RDPYD18300066_A_saliva.metaspades.bin.10  | CNA0069949 | 97.67 | 0    | 43.56 | 91.31 | TRUE | 676,413   | 724  | 687  | 99  | Chinese cohorts | MAG | human body | oral cavity |
| RDPYD18300075_A_saliva.metaspades.bin.22  | CNA0069951 | 95.35 | 0    | 43.10 | 91.79 | TRUE | 712,892   | 774  | 732  | 4   | Chinese cohorts | MAG | human body | oral cavity |
| RDPYD18300076_A_saliva.metaspades.bin.3   | CNA0069952 | 97.67 | 0    | 35.46 | 90.08 | TRUE | 633,381   | 659  | 621  | 11  | Chinese cohorts | MAG | human body | oral cavity |
| RDPYD18300081_A_saliva.metaspades.bin.28  | CNA0069954 | 97.67 | 0    | 41.50 | 88.47 | TRUE | 759,174   | 736  | 688  | 18  | Chinese cohorts | MAG | human body | oral cavity |
| RDPYD18300081_A_saliva.metaspades.bin.39  | CNA0069955 | 95.35 | 0    | 43.30 | 90.54 | TRUE | 706,123   | 765  | 720  | 127 | Chinese cohorts | MAG | human body | oral cavity |
| RDPYD18300089_A_saliva.metaspades.bin.34  | CNA0069957 | 95.35 | 0    | 43.28 | 92.56 | TRUE | 687,412   | 729  | 693  | 119 | Chinese cohorts | MAG | human body | oral cavity |
| RDPYD18300091_A_saliva.metaspades.bin.39  | CNA0069959 | 100   | 2.33 | 35.91 | 90.04 | TRUE | 667,486   | 702  | 660  | 54  | Chinese cohorts | MAG | human body | oral cavity |
| RDPYD18300091_A_saliva.metaspades.bin.68  | CNA0069960 | 97.67 | 0    | 40.29 | 89.90 | TRUE | 756,623   | 736  | 689  | 14  | Chinese cohorts | MAG | human body | oral cavity |
| RDPYD18300101_A_saliva.metaspades.bin.29  | CNA0069962 | 97.67 | 0    | 43.20 | 91.78 | TRUE | 690,587   | 739  | 700  | 23  | Chinese cohorts | MAG | human body | oral cavity |
| RDPYD18300101_A_saliva.metaspades.bin.91  | CNA0069963 | 97.67 | 4.65 | 40.16 | 90.22 | TRUE | 766,364   | 717  | 672  | 7   | Chinese cohorts | MAG | human body | oral cavity |
| RDPYD18300101_A_saliva.metaspades.bin.92  | CNA0069965 | 90.7  | 0    | 40.75 | 90.12 | TRUE | 652,405   | 638  | 607  | 17  | Chinese cohorts | MAG | human body | oral cavity |
| RDPYD18300127_A_saliva.metaspades.bin.55  | CNA0069966 | 97.67 | 0    | 35.46 | 89.53 | TRUE | 718,978   | 753  | 711  | 28  | Chinese cohorts | MAG | human body | oral cavity |
| RDPYD18300134_A_saliva.metaspades.bin.113 | CNA0069968 | 93.02 | 2.33 | 35.67 | 90.81 | TRUE | 582,452   | 612  | 579  | 119 | Chinese cohorts | MAG | human body | oral cavity |
| RDPYD18300150_A_saliva.metaspades.bin.6   | CNA0069970 | 93.02 | 0    | 43.61 | 91.56 | TRUE | 668,108   | 721  | 682  | 43  | Chinese cohorts | MAG | human body | oral cavity |
| RDPYD18300152_A_saliva.metaspades.bin.25  | CNA0069971 | 100   | 0    | 42.97 | 91.36 | TRUE | 731,943   | 798  | 753  | 34  | Chinese cohorts | MAG | human body | oral cavity |
| RDPYD18300164_A_saliva.metaspades.bin.23  | CNA0069973 | 100   | 2.33 | 43.15 | 91.10 | TRUE | 750,115   | 802  | 756  | 13  | Chinese cohorts | MAG | human body | oral cavity |
| RDPYD18300175_A_saliva.metaspades.bin.54  | CNA0069974 | 95.35 | 2.33 | 41.23 | 88.13 | TRUE | 799,604   | 769  | 716  | 25  | Chinese cohorts | MAG | human body | oral cavity |
| RDPYD18300183_A_saliva.metaspades.bin.81  | CNA0069976 | 97.67 | 0    | 42.72 | 91.54 | TRUE | 734,007   | 735  | 701  | 69  | Chinese cohorts | MAG | human body | oral cavity |
| RDPYD18300192_A_saliva.metaspades.bin.52  | CNA0069978 | 100   | 0    | 51.81 | 85.74 | TRUE | 1,065,807 | 1093 | 1049 | 12  | Chinese cohorts | MAG | human body | oral cavity |
| RDPYD18300202_A_saliva.metaspades.bin.45  | CNA0069979 | 90.7  | 0    | 36.03 | 90.91 | TRUE | 583,128   | 609  | 576  | 167 | Chinese cohorts | MAG | human body | oral cavity |
| RDPYD18300261_A_saliva.metaspades.bin.29  | CNA0069982 | 90.7  | 4.65 | 43.26 | 92.19 | TRUE | 548,416   | 592  | 563  | 146 | Chinese cohorts | MAG | human body | oral cavity |
| RDPYD18300271_A_saliva.metaspades.bin.13  | CNA0069984 | 95.35 | 2.33 | 43.19 | 91.69 | TRUE | 608,070   | 678  | 638  | 163 | Chinese cohorts | MAG | human body | oral cavity |
| RDPYD18300275_A_saliva.metaspades.bin.16  | CNA0069985 | 100   | 0    | 43.42 | 91.69 | TRUE | 741,978   | 785  | 739  | 68  | Chinese cohorts | MAG | human body | oral cavity |
| RDPYD18300291_A_saliva.metaspades.bin.51  | CNA0069987 | 93.02 | 0    | 43.58 | 91.28 | TRUE | 588,790   | 636  | 605  | 33  | Chinese cohorts | MAG | human body | oral cavity |
| RDPYD18300300_A_saliva.metaspades.bin.61  | CNA0069988 | 93.02 | 0    | 43.48 | 91.95 | TRUE | 710,288   | 754  | 718  | 81  | Chinese cohorts | MAG | human body | oral cavity |
| RDPYD18300305_A_saliva.metaspades.bin.9   | CNA0069990 | 95.35 | 2.33 | 43.13 | 91.03 | TRUE | 712,321   | 783  | 738  | 115 | Chinese cohorts | MAG | human body | oral cavity |
| RDPYD18300312_A_saliva.metaspades.bin.31  | CNA0069991 | 100   | 0    | 43.27 | 91.05 | TRUE | 715,502   | 757  | 715  | 38  | Chinese cohorts | MAG | human body | oral cavity |
| RDPYD18300323_A_saliva.metaspades.bin.46  | CNA0069993 | 93.02 | 0    | 32.75 | 90.52 | TRUE | 599,538   | 630  | 597  | 10  | Chinese cohorts | MAG | human body | oral cavity |
| RDPYD18300323_A_saliva.metaspades.bin.59  | CNA0069995 | 100   | 0    | 35.73 | 90.16 | TRUE | 665,876   | 701  | 661  | 6   | Chinese cohorts | MAG | human body | oral cavity |
| RDPYD18300324_A_saliva.metaspades.bin.14  | CNA0069996 | 97.67 | 0    | 43.50 | 91.83 | TRUE | 697,975   | 741  | 700  | 68  | Chinese cohorts | MAG | human body | oral cavity |
| RDPYD18300328_A_saliva.metaspades.bin.32  | CNA0069997 | 100   | 2.33 | 43.25 | 91.38 | TRUE | 805,508   | 879  | 831  | 94  | Chinese cohorts | MAG | human body | oral cavity |
| RDPYD18300362_A_saliva.metaspades.bin.83  | CNA0069999 | 100   | 0    | 43.05 | 91.43 | TRUE | 750,235   | 806  | 759  | 18  | Chinese cohorts | MAG | human body | oral cavity |
| RDPYD18300371_A_saliva.metaspades.bin.29  | CNA0070001 | 100   | 0    | 43.27 | 91.33 | TRUE | 702,237   | 739  | 693  | 102 | Chinese cohorts | MAG | human body | oral cavity |
| RDPYD18300377_A_saliva.metaspades.bin.20  | CNA0070002 | 93.02 | 2.33 | 40.81 | 88.95 | TRUE | 762,464   | 745  | 699  | 40  | Chinese cohorts | MAG | human body | oral cavity |
| RDPYD18300381_A_saliva.metaspades.bin.93  | CNA0070004 | 100   | 0    | 36.39 | 90.15 | TRUE | 682,394   | 699  | 658  | 14  | Chinese cohorts | MAG | human body | oral cavity |
| RDPYD18300388_A_saliva.metaspades.bin.27  | CNA0070006 | 93.02 | 0    | 43.70 | 91.72 | TRUE | 582,287   | 642  | 610  | 24  | Chinese cohorts | MAG | human body | oral cavity |
| RDPYD18300390_A_saliva.metaspades.bin.50  | CNA0070007 | 97.67 | 0    | 42.95 | 91.38 | TRUE | 701,538   | 769  | 727  | 16  | Chinese cohorts | MAG | human body | oral cavity |
| RDPYD18300395_A_saliva.metaspades.bin.59  | CNA0070009 | 95.35 | 4.65 | 43.79 | 92.82 | TRUE | 642,614   | 679  | 650  | 75  | Chinese cohorts | MAG | human body | oral cavity |
| RDPYD18300405_A_saliva.metaspades.bin.82  | CNA0070011 | 95.35 | 0    | 51.93 | 85.57 | TRUE | 942,192   | 1033 | 993  | 145 | Chinese cohorts | MAG | human body | oral cavity |
| RDPYD18300407_A_saliva.metaspades.bin.4   | CNA0070013 | 95.35 | 2.33 | 43.07 | 92.22 | TRUE | 677,933   | 730  | 693  | 132 | Chinese cohorts | MAG | human body | oral cavity |
| RDPYD18300408_A_saliva.metaspades.bin.21  | CNA0070014 | 100   | 0    | 43.18 | 91.22 | TRUE | 727,691   | 788  | 743  | 78  | Chinese cohorts | MAG | human body | oral cavity |
| RSZYD18078011_A_saliva.metaspades.bin.17  | CNA0070245 | 97.67 | 0    | 40.13 | 89.75 | TRUE | 807,699   | 771  | 724  | 52  | Chinese cohorts | MAG | human body | oral cavity |
| RSZYD18078015_A_saliva.metaspades.bin.19  | CNA0070246 | 95.35 | 4.65 | 43.56 | 91.46 | TRUE | 732,483   | 755  | 718  | 156 | Chinese cohorts | MAG | human body | oral cavity |
| RSZYD18078020_A_saliva.metaspades.bin.9   | CNA0070248 | 100   | 2.33 | 43.10 | 91.31 | TRUE | 634,389   | 683  | 641  | 9   | Chinese cohorts | MAG | human body | oral cavity |
| RSZYD18078042_A_saliva.metaspades.bin.39  | CNA0070250 | 100   | 0    | 52.04 | 85.51 | TRUE | 1,089,880 | 1098 | 1054 | 36  | Chinese cohorts | MAG | human body | oral cavity |
| RSZYD18078075_A_saliva.metaspades.bin.101 | CNA0070251 | 100   | 0    | 35.39 | 90.12 | TRUE | 656,720   | 679  | 639  | 37  | Chinese cohorts | MAG | human body | oral cavity |
| RSZYD18078076_A_saliva.metaspades.bin.41  | CNA0070253 | 97.67 | 0    | 43.40 | 92.45 | TRUE | 726,864   | 772  | 729  | 66  | Chinese cohorts | MAG | human body | oral cavity |
| RSZYD18078087_A_saliva.metaspades.bin.33  | CNA0070255 | 100   | 0    | 43.45 | 91.53 | TRUE | 707,911   | 770  | 727  | 48  | Chinese cohorts | MAG | human body | oral cavity |
| RSZYD18078088_A_saliva.metaspades.bin.16  | CNA0070256 | 100   | 0    | 36.23 | 90.57 | TRUE | 659,162   | 678  | 641  | 14  | Chinese cohorts | MAG | human body | oral cavity |
| RSZYD18078100_A_saliva.metaspades.bin.89  | CNA0070258 | 97.67 | 0    | 41.16 | 89.64 | TRUE | 815,243   | 793  | 747  | 8   | Chinese cohorts | MAG | human body | oral cavity |
| RSZYD18078102_A_saliva.metaspades.bin.17  | CNA0070260 | 100   | 0    | 43.20 | 91.49 | TRUE | 721,699   | 782  | 739  | 18  | Chinese cohorts | MAG | human body | oral cavity |
| RSZYD18078104_A_saliva.metaspades.bin.107 | CNA0070261 | 95.35 | 4.65 | 43.65 | 91.46 | TRUE | 694,455   | 765  | 722  | 105 | Chinese cohorts | MAG | human body | oral cavity |



|                                          |            |       |      |       |       |      |         |     |     |     |                 |     |            |             |
|------------------------------------------|------------|-------|------|-------|-------|------|---------|-----|-----|-----|-----------------|-----|------------|-------------|
| RSZYD18078111_A_saliva.metaspades.bin.26 | CNA0070263 | 95.35 | 0    | 51.06 | 90.53 | TRUE | 667,529 | 634 | 597 | 74  | Chinese cohorts | MAG | human body | oral cavity |
| RSZYD18078115_A_saliva.metaspades.bin.19 | CNA0070265 | 100   | 0    | 40.74 | 89.03 | TRUE | 819,698 | 804 | 759 | 19  | Chinese cohorts | MAG | human body | oral cavity |
| RSZYD18078115_A_saliva.metaspades.bin.40 | CNA0070267 | 90.7  | 0    | 41.24 | 89.78 | TRUE | 797,550 | 786 | 750 | 52  | Chinese cohorts | MAG | human body | oral cavity |
| RSZYD18078125_A_saliva.metaspades.bin.19 | CNA0070269 | 100   | 4.65 | 43.46 | 91.40 | TRUE | 787,729 | 858 | 813 | 41  | Chinese cohorts | MAG | human body | oral cavity |
| RSZYD18078134_A_saliva.metaspades.bin.52 | CNA0070271 | 100   | 0    | 43.54 | 90.82 | TRUE | 717,333 | 784 | 741 | 38  | Chinese cohorts | MAG | human body | oral cavity |
| RSZYD18078140_A_saliva.metaspades.bin.44 | CNA0070272 | 93.02 | 2.33 | 40.02 | 89.94 | TRUE | 913,313 | 862 | 813 | 87  | Chinese cohorts | MAG | human body | oral cavity |
| RSZYD18078147_A_saliva.metaspades.bin.23 | CNA0070274 | 100   | 0    | 43.30 | 90.85 | TRUE | 733,205 | 793 | 745 | 19  | Chinese cohorts | MAG | human body | oral cavity |
| RSZYD18078148_A_saliva.metaspades.bin.14 | CNA0070276 | 100   | 0    | 40.20 | 89.63 | TRUE | 795,129 | 777 | 731 | 30  | Chinese cohorts | MAG | human body | oral cavity |
| RSZYD18078148_A_saliva.metaspades.bin.88 | CNA0070278 | 95.35 | 2.33 | 42.90 | 92.31 | TRUE | 650,199 | 690 | 653 | 129 | Chinese cohorts | MAG | human body | oral cavity |
| RSZYD18078152_A_saliva.metaspades.bin.41 | CNA0070280 | 97.67 | 0    | 43.60 | 91.32 | TRUE | 656,196 | 712 | 676 | 57  | Chinese cohorts | MAG | human body | oral cavity |
| RSZYD18078153_A_saliva.metaspades.bin.25 | CNA0070282 | 90.7  | 0    | 43.56 | 92.02 | TRUE | 613,863 | 673 | 633 | 54  | Chinese cohorts | MAG | human body | oral cavity |
| RSZYD18078161_A_saliva.metaspades.bin.1  | CNA0070283 | 90.7  | 4.65 | 43.48 | 91.65 | TRUE | 666,863 | 713 | 679 | 161 | Chinese cohorts | MAG | human body | oral cavity |
| RSZYD18078167_A_saliva.metaspades.bin.4  | CNA0070285 | 90.7  | 0    | 43.64 | 92.15 | TRUE | 598,952 | 636 | 607 | 154 | Chinese cohorts | MAG | human body | oral cavity |
| RSZYD18078172_A_saliva.metaspades.bin.34 | CNA0070287 | 100   | 0    | 43.18 | 91.15 | TRUE | 731,141 | 783 | 735 | 2   | Chinese cohorts | MAG | human body | oral cavity |
| RSZYD18078181_A_saliva.metaspades.bin.10 | CNA0070289 | 100   | 2.33 | 43.22 | 91.44 | TRUE | 698,495 | 748 | 700 | 39  | Chinese cohorts | MAG | human body | oral cavity |
| RSZYD18078181_A_saliva.metaspades.bin.24 | CNA0070291 | 100   | 0    | 41.01 | 89.34 | TRUE | 800,904 | 764 | 718 | 7   | Chinese cohorts | MAG | human body | oral cavity |
| RSZYD18078181_A_saliva.metaspades.bin.55 | CNA0070293 | 100   | 2.33 | 36.25 | 89.65 | TRUE | 684,645 | 717 | 675 | 82  | Chinese cohorts | MAG | human body | oral cavity |
| RSZYD18078188_A_saliva.metaspades.bin.16 | CNA0070295 | 90.7  | 0    | 43.28 | 92.25 | TRUE | 564,703 | 594 | 565 | 154 | Chinese cohorts | MAG | human body | oral cavity |
| RSZYD18078202_A_saliva.metaspades.bin.4  | CNA0070297 | 97.67 | 0    | 43.32 | 91.56 | TRUE | 725,094 | 777 | 732 | 64  | Chinese cohorts | MAG | human body | oral cavity |
| RSZYD18078212_A_saliva.metaspades.bin.24 | CNA0070299 | 95.35 | 2.33 | 43.29 | 90.76 | TRUE | 704,756 | 770 | 723 | 104 | Chinese cohorts | MAG | human body | oral cavity |
| RSZYD18078214_A_saliva.metaspades.bin.42 | CNA0070301 | 100   | 0    | 43.16 | 91.15 | TRUE | 746,975 | 801 | 754 | 10  | Chinese cohorts | MAG | human body | oral cavity |
| RSZYD18078217_A_saliva.metaspades.bin.41 | CNA0070303 | 100   | 0    | 43.23 | 91.85 | TRUE | 730,886 | 789 | 748 | 21  | Chinese cohorts | MAG | human body | oral cavity |
| RSZYD18078217_A_saliva.metaspades.bin.95 | CNA0070304 | 100   | 0    | 40.67 | 89.13 | TRUE | 812,372 | 808 | 761 | 4   | Chinese cohorts | MAG | human body | oral cavity |
| RSZYD18078225_A_saliva.metaspades.bin.17 | CNA0070306 | 95.35 | 0    | 35.42 | 89.69 | TRUE | 615,499 | 628 | 588 | 48  | Chinese cohorts | MAG | human body | oral cavity |
| RSZYD18078228_A_saliva.metaspades.bin.31 | CNA0070308 | 100   | 0    | 43.27 | 91.43 | TRUE | 720,778 | 775 | 729 | 8   | Chinese cohorts | MAG | human body | oral cavity |
| RSZYD18078234_A_saliva.metaspades.bin.10 | CNA0070310 | 100   | 0    | 32.77 | 89.94 | TRUE | 645,415 | 661 | 620 | 11  | Chinese cohorts | MAG | human body | oral cavity |
| RSZYD18078241_A_saliva.metaspades.bin.8  | CNA0070312 | 100   | 0    | 43.47 | 90.99 | TRUE | 704,060 | 781 | 737 | 10  | Chinese cohorts | MAG | human body | oral cavity |
| RSZYD18078245_A_saliva.metaspades.bin.14 | CNA0070314 | 90.7  | 0    | 43.54 | 91.34 | TRUE | 659,520 | 681 | 647 | 121 | Chinese cohorts | MAG | human body | oral cavity |
| RSZYD18078253_A_saliva.metaspades.bin.36 | CNA0070317 | 90.7  | 0    | 43.69 | 92.16 | TRUE | 578,663 | 608 | 577 | 15  | Chinese cohorts | MAG | human body | oral cavity |
| RSZYD18078259_A_saliva.metaspades.bin.16 | CNA0070320 | 93.02 | 0    | 43.67 | 92.58 | TRUE | 660,852 | 688 | 652 | 122 | Chinese cohorts | MAG | human body | oral cavity |
| RSZYD18078259_A_saliva.metaspades.bin.22 | CNA0070322 | 90.7  | 0    | 41.09 | 88.46 | TRUE | 612,003 | 629 | 595 | 141 | Chinese cohorts | MAG | human body | oral cavity |
| RSZYD18078262_A_saliva.metaspades.bin.27 | CNA0070325 | 100   | 0    | 42.70 | 92.23 | TRUE | 670,022 | 713 | 674 | 10  | Chinese cohorts | MAG | human body | oral cavity |
| RSZYD18078262_A_saliva.metaspades.bin.69 | CNA0070328 | 100   | 0    | 35.40 | 89.88 | TRUE | 643,486 | 664 | 623 | 12  | Chinese cohorts | MAG | human body | oral cavity |
| RSZYD18078301_A_saliva.metaspades.bin.16 | CNA0070331 | 100   | 2.33 | 43.39 | 91.39 | TRUE | 742,192 | 795 | 749 | 31  | Chinese cohorts | MAG | human body | oral cavity |
| RSZYD18078307_A_saliva.metaspades.bin.33 | CNA0070334 | 100   | 0    | 43.45 | 90.93 | TRUE | 703,133 | 755 | 711 | 24  | Chinese cohorts | MAG | human body | oral cavity |
| RSZYD18078311_A_saliva.metaspades.bin.7  | CNA0070337 | 95.35 | 0    | 43.70 | 92.65 | TRUE | 605,943 | 648 | 619 | 44  | Chinese cohorts | MAG | human body | oral cavity |
| RSZYD18078315_A_saliva.metaspades.bin.18 | CNA0070340 | 93.02 | 2.33 | 43.30 | 92.22 | TRUE | 705,889 | 761 | 727 | 84  | Chinese cohorts | MAG | human body | oral cavity |
| RSZYD18078322_A_saliva.metaspades.bin.73 | CNA0070343 | 97.67 | 2.33 | 41.38 | 89.81 | TRUE | 791,378 | 761 | 718 | 7   | Chinese cohorts | MAG | human body | oral cavity |
| RSZYD18078325_A_saliva.metaspades.bin.95 | CNA0070345 | 97.67 | 0    | 41.20 | 89.19 | TRUE | 804,052 | 769 | 721 | 18  | Chinese cohorts | MAG | human body | oral cavity |
| RSZYD18078343_A_saliva.metaspades.bin.21 | CNA0070348 | 100   | 2.33 | 43.14 | 91.79 | TRUE | 788,590 | 829 | 781 | 57  | Chinese cohorts | MAG | human body | oral cavity |
| RSZYD18078343_A_saliva.metaspades.bin.34 | CNA0070351 | 93.02 | 0    | 41.11 | 89.64 | TRUE | 686,427 | 663 | 627 | 129 | Chinese cohorts | MAG | human body | oral cavity |
| RSZYD18078346_A_saliva.metaspades.bin.17 | CNA0070354 | 90.7  | 2.33 | 43.20 | 92.39 | TRUE | 709,129 | 797 | 762 | 209 | Chinese cohorts | MAG | human body | oral cavity |
| RSZYD18078354_A_saliva.metaspades.bin.16 | CNA0070357 | 100   | 0    | 43.40 | 91.46 | TRUE | 765,669 | 844 | 797 | 2   | Chinese cohorts | MAG | human body | oral cavity |
| RSZYD18078355_A_saliva.metaspades.bin.74 | CNA0070359 | 100   | 2.33 | 43.53 | 90.68 | TRUE | 626,378 | 690 | 650 | 20  | Chinese cohorts | MAG | human body | oral cavity |
| RSZYD18078359_A_saliva.metaspades.bin.14 | CNA0070362 | 95.35 | 2.33 | 43.40 | 91.32 | TRUE | 700,089 | 760 | 713 | 35  | Chinese cohorts | MAG | human body | oral cavity |
| RSZYD18078361_A_saliva.metaspades.bin.38 | CNA0070365 | 100   | 0    | 43.16 | 91.90 | TRUE | 694,390 | 744 | 697 | 9   | Chinese cohorts | MAG | human body | oral cavity |
| RSZYD18078398_A_saliva.metaspades.bin.15 | CNA0070368 | 90.7  | 0    | 41.18 | 88.96 | TRUE | 670,917 | 682 | 644 | 116 | Chinese cohorts | MAG | human body | oral cavity |
| RSZYD18078399_A_saliva.metaspades.bin.40 | CNA0070370 | 95.35 | 2.33 | 43.16 | 92.13 | TRUE | 731,331 | 773 | 732 | 98  | Chinese cohorts | MAG | human body | oral cavity |
| RSZYD18078400_A_saliva.metaspades.bin.68 | CNA0070373 | 93.02 | 0    | 43.09 | 92.23 | TRUE | 735,101 | 770 | 726 | 60  | Chinese cohorts | MAG | human body | oral cavity |
| RSZYD18078438_A_saliva.metaspades.bin.6  | CNA0070376 | 100   | 0    | 43.32 | 91.80 | TRUE | 679,561 | 715 | 672 | 96  | Chinese cohorts | MAG | human body | oral cavity |
| RSZYD18078444_A_saliva.metaspades.bin.56 | CNA0070378 | 100   | 0    | 43.06 | 91.15 | TRUE | 751,043 | 825 | 783 | 5   | Chinese cohorts | MAG | human body | oral cavity |
| RSZYD18078446_A_saliva.metaspades.bin.25 | CNA0070382 | 97.67 | 4.65 | 35.63 | 90.09 | TRUE | 632,002 | 659 | 620 | 60  | Chinese cohorts | MAG | human body | oral cavity |
| RSZYD18078454_A_saliva.metaspades.bin.52 | CNA0070384 | 100   | 2.33 | 43.31 | 91.42 | TRUE | 733,489 | 786 | 739 | 27  | Chinese cohorts | MAG | human body | oral cavity |
| RSZYD18078461_A_saliva.metaspades.bin.53 | CNA0070387 | 90.7  | 4.65 | 43.50 | 92.08 | TRUE | 631,055 | 668 | 640 | 29  | Chinese cohorts | MAG | human body | oral cavity |
| RSZYD18078463_A_saliva.metaspades.bin.4  | CNA0070390 | 100   | 0    | 35.79 | 90.21 | TRUE | 695,790 | 727 | 686 | 4   | Chinese cohorts | MAG | human body | oral cavity |
| RSZYD18078466_A_saliva.metaspades.bin.3  | CNA0070392 | 100   | 0    | 43.15 | 91.12 | TRUE | 763,611 | 832 | 786 | 5   | Chinese cohorts | MAG | human body | oral cavity |
| RSZYD18078467_A_saliva.metaspades.bin.16 | CNA0070395 | 100   | 0    | 36.24 | 89.95 | TRUE | 696,013 | 715 | 675 | 44  | Chinese cohorts | MAG | human body | oral cavity |
| RSZYD18078473_A_saliva.metaspades.bin.18 | CNA0070398 | 93.02 | 0    | 43.15 | 91.07 | TRUE | 631,416 | 670 | 624 | 114 | Chinese cohorts | MAG | human body | oral cavity |
| RSZYD18078481_A_saliva.metaspades.bin.7  | CNA0070401 | 95.35 | 0    | 35.76 | 90.72 | TRUE | 647,624 | 669 | 628 | 10  | Chinese cohorts | MAG | human body | oral cavity |
| RSZYD18078482_A_saliva.metaspades.bin.17 | CNA0070404 | 90.7  | 0    | 35.52 | 90.40 | TRUE | 612,062 | 683 | 646 | 95  | Chinese cohorts | MAG | human body | oral cavity |
| RSZYD18078483_A_saliva.metaspades.bin.4  | CNA0070406 | 100   | 0    | 43.34 | 91.39 | TRUE | 676,450 | 732 | 691 | 10  | Chinese cohorts | MAG | human body | oral cavity |
| RSZYD18078489_A_saliva.metaspades.bin.18 | CNA0070424 | 100   | 0    | 43.17 | 91.27 | TRUE | 734,866 | 806 | 758 | 5   | Chinese cohorts | MAG | human body | oral cavity |
| RSZYD18078490_A_saliva.metaspades.bin.38 | CNA0070427 | 100   | 2.33 | 43.47 | 91.26 | TRUE | 684,940 | 750 | 705 | 14  | Chinese cohorts | MAG | human body | oral cavity |
| RSZYD18078531_A_saliva.metaspades.bin.36 | CNA0070430 | 100   | 0    | 43.19 | 92.05 | TRUE | 770,972 | 841 | 796 | 7   | Chinese cohorts | MAG | human body | oral cavity |
| RSZYD18078542_A_saliva.metaspades.bin.52 | CNA0070433 | 93.02 | 2.33 | 41.11 | 89.05 | TRUE | 566,319 | 555 | 524 | 150 | Chinese cohorts | MAG | human body | oral cavity |
| RSZYD18078542_A_saliva.metaspades.bin.5  | CNA0070436 | 95.35 | 2.33 | 43.63 | 92.13 | TRUE | 636,474 | 685 | 653 | 27  | Chinese cohorts | MAG | human body | oral cavity |
| RSZYD18078550_A_saliva.metaspades.bin.59 | CNA0070439 | 95.35 | 2.33 | 43.45 | 91.62 | TRUE | 708,734 | 771 | 728 | 44  | Chinese cohorts | MAG | human body | oral cavity |
| RSZYD18078555_A_saliva.metaspades.bin.67 | CNA0070442 | 97.67 | 2.33 | 35.94 | 90.38 | TRUE | 664,442 | 704 | 668 | 12  | Chinese cohorts | MAG | human body | oral cavity |
| RSZYD18078562_A_saliva.metaspades.bin.64 | CNA0070444 | 90.7  | 0    | 40.36 | 89.83 | TRUE | 756,044 | 726 | 680 | 66  | Chinese cohorts | MAG | human body | oral cavity |
| RSZYD18078570_A_saliva.metaspades.bin.17 | CNA0070447 | 90.7  | 2.33 | 50.98 | 91.07 | TRUE | 650,787 | 624 | 596 | 171 | Chinese cohorts | MAG | human body | oral cavity |
| RSZYD18078571_A_saliva.metaspades.bin.52 | CNA0070450 | 95.35 | 2.33 | 43.01 | 92.41 | TRUE | 576,544 | 628 | 595 | 109 | Chinese cohorts | MAG | human body | oral cavity |
| RSZYD18078579_A_saliva.metaspades.bin.26 | CNA0070453 | 97.67 | 0    | 35.65 | 90.46 | TRUE | 645,673 | 679 | 642 | 12  | Chinese cohorts | MAG | human body | oral cavity |
| RSZYD18078582_A_saliva.metaspades.bin.27 | CNA0070456 | 95.35 | 4.65 | 43.98 | 91.87 | TRUE | 644,557 | 667 | 637 | 114 | Chinese cohorts | MAG | human body | oral cavity |
| RSZYD18078582_A_saliva.metaspades.bin.58 | CNA0070459 | 93.02 | 2.33 | 40.63 | 90.27 | TRUE | 629,261 | 596 | 558 | 18  | Chinese cohorts | MAG | human body | oral cavity |
| RSZYD18078590_A_saliva.metaspades.bin.50 | CNA0070461 | 100   | 0    | 36.55 | 90.44 | TRUE | 714,281 | 755 | 714 | 20  | Chinese cohorts | MAG | human body | oral cavity |
| RSZYD18078593_A_saliva.metaspades.bin.35 | CNA0070464 | 95.35 | 0    | 43.46 | 92.37 | TRUE | 640,626 | 705 | 668 | 116 | Chinese cohorts | MAG | human body | oral cavity |
| RSZYD18078595_A_saliva.metaspades.bin.65 | CNA0070467 | 90.7  | 2.33 | 43.65 | 91.85 | TRUE | 654,790 | 730 | 694 | 41  | Chinese cohorts | MAG | human body | oral cavity |
| RSZYD18078604_A_saliva.metaspades.bin.57 | CNA0070470 | 90.7  | 0    | 43.93 | 91.92 | TRUE | 621,529 | 683 | 650 | 18  | Chinese cohorts | MAG | human body | oral cavity |
| RSZYD18078609_A_saliva.metaspades.bin.12 | CNA0070472 | 100   | 0    | 43.45 | 91.90 | TRUE | 763,690 | 839 | 793 | 8   | Chinese cohorts | MAG | human body | oral cavity |
| RSZYD18078615_A_saliva.metaspades.bin.32 | CNA0070475 | 100   | 2.33 | 40.76 | 89.39 | TRUE | 805,033 | 813 | 767 | 124 | Chinese cohorts | MAG | human body | oral cavity |
| RSZYD18078615_A_saliva.metaspades.bin.45 | CNA0070478 | 100   | 0    | 43.18 | 91.51 | TRUE | 773,452 | 848 | 802 | 18  | Chinese cohorts | MAG | human body | oral cavity |

|                                           |            |       |      |       |       |      |         |     |     |     |                 |     |            |             |
|-------------------------------------------|------------|-------|------|-------|-------|------|---------|-----|-----|-----|-----------------|-----|------------|-------------|
| RSZYD18078620_A_saliva.metaspades.bin.29  | CNA0070480 | 93.02 | 0    | 43.79 | 91.82 | TRUE | 617,972 | 678 | 645 | 83  | Chinese cohorts | MAG | human body | oral cavity |
| RSZYD18078622_A_saliva.metaspades.bin.17  | CNA0070484 | 100   | 0    | 35.63 | 90.06 | TRUE | 650,014 | 679 | 638 | 4   | Chinese cohorts | MAG | human body | oral cavity |
| RSZYD18078623_A_saliva.metaspades.bin.44  | CNA0070487 | 100   | 0    | 36.06 | 89.11 | TRUE | 666,304 | 697 | 655 | 5   | Chinese cohorts | MAG | human body | oral cavity |
| RSZYD18078630_A_saliva.metaspades.bin.13  | CNA0070490 | 93.02 | 0    | 43.80 | 92.03 | TRUE | 565,961 | 615 | 587 | 128 | Chinese cohorts | MAG | human body | oral cavity |
| RSZYD18078639_A_saliva.metaspades.bin.14  | CNA0070492 | 100   | 0    | 43.14 | 91.59 | TRUE | 699,225 | 754 | 709 | 25  | Chinese cohorts | MAG | human body | oral cavity |
| RSZYD18078648_A_saliva.metaspades.bin.16  | CNA0070495 | 100   | 0    | 43.17 | 90.91 | TRUE | 735,976 | 792 | 746 | 33  | Chinese cohorts | MAG | human body | oral cavity |
| RSZYD18078660_A_saliva.metaspades.bin.67  | CNA0070497 | 100   | 2.33 | 43.51 | 90.87 | TRUE | 659,436 | 717 | 672 | 17  | Chinese cohorts | MAG | human body | oral cavity |
| RSZYD18078673_A_saliva.metaspades.bin.3   | CNA0070500 | 100   | 0    | 43.28 | 91.62 | TRUE | 697,131 | 748 | 708 | 7   | Chinese cohorts | MAG | human body | oral cavity |
| RSZYD18078674_A_saliva.metaspades.bin.36  | CNA0070504 | 100   | 0    | 35.80 | 90.05 | TRUE | 723,932 | 771 | 730 | 13  | Chinese cohorts | MAG | human body | oral cavity |
| RSZYD18078691_A_saliva.metaspades.bin.32  | CNA0070507 | 93.02 | 2.33 | 43.44 | 92.05 | TRUE | 687,163 | 734 | 697 | 65  | Chinese cohorts | MAG | human body | oral cavity |
| RSZYD18078695_A_saliva.metaspades.bin.25  | CNA0070509 | 100   | 0    | 40.24 | 90.22 | TRUE | 778,967 | 743 | 695 | 5   | Chinese cohorts | MAG | human body | oral cavity |
| RSZYD18078695_A_saliva.metaspades.bin.45  | CNA0070512 | 100   | 0    | 43.11 | 91.34 | TRUE | 705,310 | 752 | 709 | 8   | Chinese cohorts | MAG | human body | oral cavity |
| RSZYD18078697_A_saliva.metaspades.bin.17  | CNA0070515 | 93.02 | 0    | 43.59 | 91.97 | TRUE | 634,460 | 691 | 656 | 113 | Chinese cohorts | MAG | human body | oral cavity |
| RSZYD18078703_A_saliva.metaspades.bin.8   | CNA0070517 | 100   | 0    | 43.14 | 91.99 | TRUE | 719,873 | 762 | 719 | 20  | Chinese cohorts | MAG | human body | oral cavity |
| RSZYD18078705_A_saliva.metaspades.bin.21  | CNA0070520 | 97.67 | 0    | 35.42 | 89.93 | TRUE | 619,023 | 643 | 602 | 13  | Chinese cohorts | MAG | human body | oral cavity |
| RSZYD18078713_A_saliva.metaspades.bin.36  | CNA0070523 | 90.7  | 0    | 35.70 | 89.73 | TRUE | 656,138 | 684 | 643 | 26  | Chinese cohorts | MAG | human body | oral cavity |
| RSZYD18078725_A_saliva.metaspades.bin.23  | CNA0070526 | 97.67 | 0    | 42.97 | 92.09 | TRUE | 721,883 | 788 | 746 | 53  | Chinese cohorts | MAG | human body | oral cavity |
| RSZYD18078736_A_saliva.metaspades.bin.17  | CNA0070529 | 97.67 | 4.65 | 40.44 | 88.60 | TRUE | 729,354 | 704 | 656 | 71  | Chinese cohorts | MAG | human body | oral cavity |
| RSZYD18078738_A_saliva.metaspades.bin.63  | CNA0070531 | 95.35 | 0    | 43.65 | 92.38 | TRUE | 691,229 | 745 | 709 | 54  | Chinese cohorts | MAG | human body | oral cavity |
| RSZYD18078741_A_saliva.metaspades.bin.48  | CNA0070534 | 95.35 | 2.33 | 43.38 | 92.53 | TRUE | 681,505 | 733 | 695 | 19  | Chinese cohorts | MAG | human body | oral cavity |
| RSZYD18078746_A_saliva.metaspades.bin.2   | CNA0070537 | 90.7  | 0    | 43.53 | 92.21 | TRUE | 578,698 | 632 | 601 | 147 | Chinese cohorts | MAG | human body | oral cavity |
| RSZYD18078747_A_saliva.metaspades.bin.1   | CNA0070540 | 90.7  | 0    | 43.79 | 91.33 | TRUE | 596,254 | 628 | 600 | 110 | Chinese cohorts | MAG | human body | oral cavity |
| RSZYD18078748_A_saliva.metaspades.bin.42  | CNA0070543 | 97.67 | 2.33 | 32.66 | 90.97 | TRUE | 589,346 | 598 | 563 | 20  | Chinese cohorts | MAG | human body | oral cavity |
| RSZYD18078749_A_saliva.metaspades.bin.35  | CNA0070546 | 100   | 0    | 35.82 | 89.79 | TRUE | 669,553 | 697 | 658 | 29  | Chinese cohorts | MAG | human body | oral cavity |
| RSZYD18078749_A_saliva.metaspades.bin.36  | CNA0070550 | 97.67 | 2.33 | 43.43 | 91.31 | TRUE | 675,915 | 723 | 681 | 87  | Chinese cohorts | MAG | human body | oral cavity |
| RSZYD18078756_A_saliva.metaspades.bin.24  | CNA0070552 | 100   | 2.33 | 40.10 | 89.78 | TRUE | 830,534 | 791 | 746 | 40  | Chinese cohorts | MAG | human body | oral cavity |
| RSZYD18078760_A_saliva.metaspades.bin.11  | CNA0070555 | 100   | 0    | 35.79 | 90.24 | TRUE | 687,024 | 721 | 680 | 3   | Chinese cohorts | MAG | human body | oral cavity |
| RSZYD18078768_A_saliva.metaspades.bin.28  | CNA0070558 | 90.7  | 0    | 44.01 | 92.52 | TRUE | 543,498 | 578 | 555 | 112 | Chinese cohorts | MAG | human body | oral cavity |
| RSZYD18078769_A_saliva.metaspades.bin.23  | CNA0070561 | 95.35 | 2.33 | 43.69 | 92.00 | TRUE | 704,461 | 761 | 729 | 56  | Chinese cohorts | MAG | human body | oral cavity |
| RSZYD18078769_A_saliva.metaspades.bin.60  | CNA0070564 | 97.67 | 2.33 | 39.75 | 89.51 | TRUE | 816,877 | 781 | 734 | 6   | Chinese cohorts | MAG | human body | oral cavity |
| RSZYD18078773_A_saliva.metaspades.bin.71  | CNA0070567 | 93.02 | 2.33 | 43.27 | 92.02 | TRUE | 714,022 | 781 | 747 | 117 | Chinese cohorts | MAG | human body | oral cavity |
| RSZYD18078781_A_saliva.metaspades.bin.11  | CNA0070570 | 97.67 | 0    | 43.25 | 91.50 | TRUE | 652,719 | 711 | 669 | 78  | Chinese cohorts | MAG | human body | oral cavity |
| RSZYD18078790_A_saliva.metaspades.bin.58  | CNA0070573 | 100   | 0    | 43.28 | 92.08 | TRUE | 752,391 | 792 | 746 | 14  | Chinese cohorts | MAG | human body | oral cavity |
| RSZYD18078796_A_saliva.metaspades.bin.47  | CNA0070576 | 93.02 | 0    | 43.64 | 91.92 | TRUE | 630,631 | 691 | 657 | 50  | Chinese cohorts | MAG | human body | oral cavity |
| RSZYD18078798_A_saliva.metaspades.bin.24  | CNA0070578 | 100   | 0    | 41.01 | 88.70 | TRUE | 786,628 | 777 | 731 | 17  | Chinese cohorts | MAG | human body | oral cavity |
| RSZYD18078807_A_saliva.metaspades.bin.46  | CNA0070581 | 90.7  | 0    | 43.57 | 92.14 | TRUE | 553,881 | 593 | 560 | 126 | Chinese cohorts | MAG | human body | oral cavity |
| RSZYD18078809_A_saliva.metaspades.bin.65  | CNA0070584 | 100   | 0    | 42.99 | 91.07 | TRUE | 731,225 | 791 | 743 | 2   | Chinese cohorts | MAG | human body | oral cavity |
| RSZYD18187002_A_saliva.metaspades.bin.29  | CNA0070587 | 93.02 | 2.33 | 40.21 | 90.08 | TRUE | 953,634 | 927 | 872 | 177 | Chinese cohorts | MAG | human body | oral cavity |
| RSZYD18187002_A_saliva.metaspades.bin.39  | CNA0070590 | 100   | 0    | 41.21 | 89.47 | TRUE | 714,022 | 692 | 652 | 14  | Chinese cohorts | MAG | human body | oral cavity |
| RSZYD18187002_A_saliva.metaspades.bin.59  | CNA0070592 | 100   | 0    | 43.17 | 91.11 | TRUE | 734,101 | 792 | 745 | 9   | Chinese cohorts | MAG | human body | oral cavity |
| RSZYD18187004_A_saliva.metaspades.bin.5   | CNA0070595 | 100   | 0    | 43.22 | 91.28 | TRUE | 736,607 | 794 | 748 | 23  | Chinese cohorts | MAG | human body | oral cavity |
| RSZYD18187015_A_saliva.metaspades.bin.20  | CNA0070598 | 95.35 | 0    | 43.78 | 93.05 | TRUE | 611,122 | 648 | 621 | 143 | Chinese cohorts | MAG | human body | oral cavity |
| RSZYD18187023_A_saliva.metaspades.bin.32  | CNA0070601 | 100   | 4.65 | 36.12 | 91.31 | TRUE | 664,629 | 693 | 661 | 58  | Chinese cohorts | MAG | human body | oral cavity |
| RSZYD18187034_A_saliva.metaspades.bin.52  | CNA0070604 | 93.02 | 0    | 43.23 | 91.80 | TRUE | 752,517 | 813 | 769 | 14  | Chinese cohorts | MAG | human body | oral cavity |
| RSZYD18187045_A_saliva.metaspades.bin.39  | CNA0070608 | 100   | 0    | 35.38 | 90.68 | TRUE | 622,773 | 642 | 604 | 9   | Chinese cohorts | MAG | human body | oral cavity |
| RSZYD18187057_A_saliva.metaspades.bin.25  | CNA0070611 | 100   | 2.33 | 43.17 | 91.19 | TRUE | 773,770 | 849 | 803 | 24  | Chinese cohorts | MAG | human body | oral cavity |
| RSZYD18187059_A_saliva.metaspades.bin.27  | CNA0070614 | 90.7  | 0    | 43.29 | 91.14 | TRUE | 646,131 | 643 | 601 | 69  | Chinese cohorts | MAG | human body | oral cavity |
| RSZYD18187064_A_saliva.metaspades.bin.52  | CNA0070616 | 93.02 | 0    | 43.52 | 91.66 | TRUE | 682,127 | 724 | 687 | 73  | Chinese cohorts | MAG | human body | oral cavity |
| RSZYD18187065_A_saliva.metaspades.bin.38  | CNA0070619 | 97.67 | 0    | 43.74 | 91.56 | TRUE | 659,746 | 703 | 669 | 26  | Chinese cohorts | MAG | human body | oral cavity |
| RSZYD18187069_A_saliva.metaspades.bin.26  | CNA0070622 | 100   | 2.33 | 43.30 | 91.43 | TRUE | 713,176 | 771 | 726 | 46  | Chinese cohorts | MAG | human body | oral cavity |
| RSZYD18187110_A_saliva.metaspades.bin.14  | CNA0070625 | 97.67 | 0    | 43.38 | 92.01 | TRUE | 742,211 | 791 | 743 | 67  | Chinese cohorts | MAG | human body | oral cavity |
| RSZYD18187112_A_saliva.metaspades.bin.35  | CNA0070628 | 100   | 0    | 35.55 | 89.33 | TRUE | 665,697 | 689 | 648 | 31  | Chinese cohorts | MAG | human body | oral cavity |
| RSZYD18187115_A_saliva.metaspades.bin.47  | CNA0070631 | 97.67 | 0    | 40.67 | 90.38 | TRUE | 716,945 | 709 | 664 | 41  | Chinese cohorts | MAG | human body | oral cavity |
| RSZYD18187116_A_saliva.metaspades.bin.9   | CNA0070635 | 97.67 | 0    | 36.43 | 90.42 | TRUE | 593,645 | 614 | 579 | 154 | Chinese cohorts | MAG | human body | oral cavity |
| RSZYD18187118_A_saliva.metaspades.bin.24  | CNA0070638 | 95.35 | 0    | 43.29 | 91.66 | TRUE | 738,863 | 795 | 749 | 35  | Chinese cohorts | MAG | human body | oral cavity |
| RSZYD18187119_A_saliva.metaspades.bin.9   | CNA0070642 | 95.35 | 0    | 35.91 | 91.18 | TRUE | 656,329 | 687 | 650 | 34  | Chinese cohorts | MAG | human body | oral cavity |
| RSZYD18187120_A_saliva.metaspades.bin.19  | CNA0070645 | 100   | 0    | 40.18 | 90.04 | TRUE | 824,018 | 808 | 760 | 15  | Chinese cohorts | MAG | human body | oral cavity |
| RSZYD18187123_A_saliva.metaspades.bin.13  | CNA0070648 | 100   | 2.33 | 43.17 | 91.42 | TRUE | 746,522 | 812 | 766 | 3   | Chinese cohorts | MAG | human body | oral cavity |
| RSZYD18187124_A_saliva.metaspades.bin.16  | CNA0070651 | 100   | 2.33 | 35.66 | 89.51 | TRUE | 649,700 | 671 | 629 | 15  | Chinese cohorts | MAG | human body | oral cavity |
| RSZYD18187142_A_saliva.metaspades.bin.22  | CNA0070654 | 97.67 | 0    | 43.10 | 91.88 | TRUE | 657,515 | 723 | 680 | 21  | Chinese cohorts | MAG | human body | oral cavity |
| RSZYD18187144_A_saliva.metaspades.bin.68  | CNA0070658 | 100   | 0    | 40.28 | 90.26 | TRUE | 761,396 | 736 | 690 | 36  | Chinese cohorts | MAG | human body | oral cavity |
| RSZYD18187166_A_saliva.metaspades.bin.15  | CNA0070660 | 100   | 2.33 | 43.23 | 91.09 | TRUE | 716,877 | 775 | 728 | 20  | Chinese cohorts | MAG | human body | oral cavity |
| RSZYD18187169_A_saliva.metaspades.bin.33  | CNA0070663 | 95.35 | 2.33 | 44.01 | 91.76 | TRUE | 558,468 | 597 | 564 | 160 | Chinese cohorts | MAG | human body | oral cavity |
| RSZYD18187171_A_saliva.metaspades.bin.47  | CNA0070666 | 100   | 4.65 | 43.23 | 90.97 | TRUE | 790,984 | 849 | 798 | 46  | Chinese cohorts | MAG | human body | oral cavity |
| RSZYD18187174_A_saliva.metaspades.bin.29  | CNA0070668 | 90.7  | 0    | 42.12 | 89.45 | TRUE | 476,004 | 466 | 446 | 129 | Chinese cohorts | MAG | human body | oral cavity |
| RSZYD18187184_A_saliva.metaspades.bin.10  | CNA0070671 | 100   | 2.33 | 43.10 | 91.37 | TRUE | 748,977 | 827 | 781 | 12  | Chinese cohorts | MAG | human body | oral cavity |
| RSZYD18187184_A_saliva.metaspades.bin.14  | CNA0070674 | 100   | 2.33 | 41.01 | 88.73 | TRUE | 723,795 | 709 | 664 | 40  | Chinese cohorts | MAG | human body | oral cavity |
| RSZYD18187200_A_saliva.metaspades.bin.37  | CNA0070677 | 100   | 0    | 43.26 | 91.48 | TRUE | 751,911 | 826 | 782 | 26  | Chinese cohorts | MAG | human body | oral cavity |
| RSZYD18187203_A_saliva.metaspades.bin.7   | CNA0070680 | 93.02 | 2.33 | 43.85 | 92.16 | TRUE | 599,492 | 645 | 615 | 71  | Chinese cohorts | MAG | human body | oral cavity |
| RSZYD18187210_A_saliva.metaspades.bin.21  | CNA0070684 | 95.35 | 2.33 | 43.71 | 93.00 | TRUE | 678,056 | 712 | 672 | 147 | Chinese cohorts | MAG | human body | oral cavity |
| RSZYD18187216_A_saliva.metaspades.bin.102 | CNA0070687 | 95.35 | 2.33 | 43.59 | 91.98 | TRUE | 624,347 | 687 | 650 | 30  | Chinese cohorts | MAG | human body | oral cavity |
| RSZYD18187216_A_saliva.metaspades.bin.13  | CNA0070690 | 97.67 | 0    | 32.44 | 90.90 | TRUE | 607,799 | 626 | 589 | 9   | Chinese cohorts | MAG | human body | oral cavity |
| RSZYD18187234_A_saliva.metaspades.bin.73  | CNA0070693 | 100   | 0    | 43.01 | 91.57 | TRUE | 736,591 | 796 | 749 | 7   | Chinese cohorts | MAG | human body | oral cavity |
| RSZYD18187234_A_saliva.metaspades.bin.82  | CNA0070697 | 100   | 0    | 40.11 | 89.55 | TRUE | 804,670 | 780 | 733 | 37  | Chinese cohorts | MAG | human body | oral cavity |
| RSZYD18187237_A_saliva.metaspades.bin.71  | CNA0070700 | 100   | 0    | 43.11 | 92.14 | TRUE | 738,956 | 809 | 763 | 7   | Chinese cohorts | MAG | human body | oral cavity |
| RSZYD18187244_A_saliva.metaspades.bin.38  | CNA0070703 | 100   | 4.65 | 43.11 | 92.49 | TRUE | 778,670 | 837 | 794 | 55  | Chinese cohorts | MAG | human body | oral cavity |
| RSZYD18187261_A_saliva.metaspades.bin.68  | CNA0070707 | 95.35 | 4.65 | 42.03 | 90.49 | TRUE | 651,844 | 621 | 587 | 133 | Chinese cohorts | MAG | human body | oral cavity |
| RSZYD18187273_A_saliva.metaspades.bin.58  | CNA0070710 | 100   | 2.33 | 43.25 | 91.14 | TRUE | 724,657 | 783 | 734 | 15  | Chinese cohorts | MAG | human body | oral cavity |
| RSZYD18187273_A_saliva.metaspades.bin.99  | CNA0070713 | 100   | 0    | 40.29 | 89.81 | TRUE | 784,862 | 755 | 706 | 8   | Chinese cohorts | MAG | human body | oral cavity |
| RSZYD18187275_A_saliva.metaspades.bin.59  | CNA0070716 | 93.02 | 4.65 | 51.59 | 90.56 | TRUE | 665,340 | 607 | 581 | 171 | Chinese cohorts | MAG | human body | oral cavity |
| RSZYD18187280_A_saliva.metaspades.bin.37  | CNA0070719 | 93.02 | 2.33 | 43.87 | 91.90 | TRUE | 736,943 | 807 | 775 | 55  | Chinese cohorts | MAG | human body | oral cavity |



|                                          |            |       |      |       |       |      |         |     |     |     |                 |     |            |             |
|------------------------------------------|------------|-------|------|-------|-------|------|---------|-----|-----|-----|-----------------|-----|------------|-------------|
| RSZYD18187281_A_saliva.metaspades.bin.17 | CNA0070723 | 95.35 | 0    | 43.64 | 92.33 | TRUE | 611,054 | 674 | 644 | 36  | Chinese cohorts | MAG | human body | oral cavity |
| RSZYD18187299_A_saliva.metaspades.bin.6  | CNA0070726 | 95.35 | 0    | 43.74 | 92.37 | TRUE | 629,861 | 691 | 655 | 54  | Chinese cohorts | MAG | human body | oral cavity |
| RSZYD18187301_A_saliva.metaspades.bin.29 | CNA0070730 | 95.35 | 4.65 | 43.94 | 92.57 | TRUE | 600,990 | 625 | 597 | 189 | Chinese cohorts | MAG | human body | oral cavity |
| RSZYD18187306_A_saliva.metaspades.bin.13 | CNA0070733 | 100   | 0    | 43.80 | 90.79 | TRUE | 696,365 | 746 | 699 | 68  | Chinese cohorts | MAG | human body | oral cavity |
| RSZYD18187311_A_saliva.metaspades.bin.30 | CNA0070737 | 100   | 0    | 35.85 | 90.18 | TRUE | 666,113 | 696 | 655 | 17  | Chinese cohorts | MAG | human body | oral cavity |
| RSZYD18187312_A_saliva.metaspades.bin.49 | CNA0070740 | 93.02 | 0    | 43.58 | 92.78 | TRUE | 601,691 | 651 | 621 | 29  | Chinese cohorts | MAG | human body | oral cavity |
| RSZYD18187316_A_saliva.metaspades.bin.18 | CNA0070743 | 100   | 0    | 35.79 | 90.22 | TRUE | 702,011 | 748 | 710 | 9   | Chinese cohorts | MAG | human body | oral cavity |
| RSZYD18187324_A_saliva.metaspades.bin.25 | CNA0070746 | 93.02 | 4.65 | 43.78 | 92.64 | TRUE | 573,191 | 605 | 579 | 24  | Chinese cohorts | MAG | human body | oral cavity |
| RSZYD18187327_A_saliva.metaspades.bin.15 | CNA0070750 | 95.35 | 2.33 | 41.66 | 89.38 | TRUE | 609,603 | 591 | 558 | 197 | Chinese cohorts | MAG | human body | oral cavity |
| RSZYD18187330_A_saliva.metaspades.bin.30 | CNA0070753 | 95.35 | 0    | 41.13 | 89.57 | TRUE | 749,839 | 745 | 703 | 101 | Chinese cohorts | MAG | human body | oral cavity |
| RSZYD18187330_A_saliva.metaspades.bin.47 | CNA0070756 | 97.67 | 0    | 50.64 | 89.31 | TRUE | 740,094 | 692 | 650 | 75  | Chinese cohorts | MAG | human body | oral cavity |
| RSZYD18187336_A_saliva.metaspades.bin.56 | CNA0070760 | 93.02 | 0    | 41.27 | 89.57 | TRUE | 694,901 | 682 | 643 | 120 | Chinese cohorts | MAG | human body | oral cavity |
| RSZYD18187340_A_saliva.metaspades.bin.39 | CNA0070762 | 97.67 | 2.33 | 43.72 | 92.88 | TRUE | 545,817 | 594 | 567 | 119 | Chinese cohorts | MAG | human body | oral cavity |
| RSZYD18187344_A_saliva.metaspades.bin.34 | CNA0070765 | 100   | 0    | 43.11 | 91.09 | TRUE | 721,464 | 788 | 742 | 5   | Chinese cohorts | MAG | human body | oral cavity |
| RSZYD18187344_A_saliva.metaspades.bin.53 | CNA0070768 | 100   | 0    | 35.55 | 90.27 | TRUE | 634,496 | 659 | 623 | 42  | Chinese cohorts | MAG | human body | oral cavity |
| RSZYD18187344_A_saliva.metaspades.bin.71 | CNA0070771 | 95.35 | 0    | 41.08 | 89.86 | TRUE | 646,308 | 638 | 607 | 36  | Chinese cohorts | MAG | human body | oral cavity |
| RSZYD18187345_A_saliva.metaspades.bin.42 | CNA0070774 | 100   | 0    | 43.35 | 91.46 | TRUE | 709,544 | 765 | 721 | 74  | Chinese cohorts | MAG | human body | oral cavity |
| RSZYD18187349_A_saliva.metaspades.bin.40 | CNA0070777 | 90.7  | 0    | 35.68 | 90.66 | TRUE | 582,620 | 612 | 580 | 154 | Chinese cohorts | MAG | human body | oral cavity |
| RSZYD18187350_A_saliva.metaspades.bin.64 | CNA0070781 | 100   | 2.33 | 41.07 | 89.18 | TRUE | 767,957 | 739 | 693 | 30  | Chinese cohorts | MAG | human body | oral cavity |
| RSZYD18187358_A_saliva.metaspades.bin.22 | CNA0070784 | 95.35 | 0    | 43.20 | 92.38 | TRUE | 705,549 | 756 | 717 | 15  | Chinese cohorts | MAG | human body | oral cavity |
| RSZYD18187361_A_saliva.metaspades.bin.8  | CNA0070787 | 90.7  | 0    | 43.77 | 92.09 | TRUE | 633,572 | 685 | 655 | 54  | Chinese cohorts | MAG | human body | oral cavity |
| RSZYD18187379_A_saliva.metaspades.bin.62 | CNA0070790 | 93.02 | 0    | 43.12 | 90.30 | TRUE | 652,425 | 706 | 656 | 22  | Chinese cohorts | MAG | human body | oral cavity |
| RSZYD18187382_A_saliva.metaspades.bin.10 | CNA0070792 | 100   | 0    | 36.55 | 90.83 | TRUE | 646,250 | 658 | 620 | 82  | Chinese cohorts | MAG | human body | oral cavity |
| RSZYD18187389_A_saliva.metaspades.bin.6  | CNA0070794 | 100   | 2.33 | 43.64 | 91.30 | TRUE | 675,195 | 716 | 676 | 14  | Chinese cohorts | MAG | human body | oral cavity |
| RSZYD18187400_A_saliva.metaspades.bin.14 | CNA0070797 | 97.67 | 2.33 | 38.26 | 91.46 | TRUE | 764,074 | 794 | 752 | 70  | Chinese cohorts | MAG | human body | oral cavity |
| RSZYD18187400_A_saliva.metaspades.bin.89 | CNA0070800 | 97.67 | 4.65 | 48.04 | 91.65 | TRUE | 775,328 | 817 | 782 | 30  | Chinese cohorts | MAG | human body | oral cavity |
| RSZYD18187409_A_saliva.metaspades.bin.8  | CNA0070804 | 93.02 | 2.33 | 43.98 | 93.42 | TRUE | 497,595 | 518 | 497 | 154 | Chinese cohorts | MAG | human body | oral cavity |
| RSZYD18187425_A_saliva.metaspades.bin.18 | CNA0070806 | 97.67 | 0    | 43.41 | 91.64 | TRUE | 737,989 | 809 | 764 | 50  | Chinese cohorts | MAG | human body | oral cavity |
| RSZYD18187427_A_saliva.metaspades.bin.75 | CNA0070809 | 93.02 | 0    | 43.67 | 92.85 | TRUE | 654,252 | 709 | 678 | 20  | Chinese cohorts | MAG | human body | oral cavity |
| RSZYD18187438_A_saliva.metaspades.bin.51 | CNA0070812 | 93.02 | 2.33 | 35.91 | 90.60 | TRUE | 562,667 | 608 | 578 | 182 | Chinese cohorts | MAG | human body | oral cavity |
| RSZYD18187442_A_saliva.metaspades.bin.35 | CNA0070814 | 100   | 2.33 | 43.15 | 92.01 | TRUE | 694,835 | 753 | 717 | 80  | Chinese cohorts | MAG | human body | oral cavity |
| RSZYD18187447_A_saliva.metaspades.bin.38 | CNA0070818 | 100   | 0    | 35.44 | 90.42 | TRUE | 654,413 | 696 | 657 | 13  | Chinese cohorts | MAG | human body | oral cavity |
| RSZYD18187457_A_saliva.metaspades.bin.42 | CNA0070821 | 93.02 | 0    | 43.26 | 91.21 | TRUE | 697,639 | 769 | 724 | 62  | Chinese cohorts | MAG | human body | oral cavity |
| RSZYD18187458_A_saliva.metaspades.bin.36 | CNA0070824 | 100   | 0    | 32.70 | 89.93 | TRUE | 643,133 | 663 | 622 | 12  | Chinese cohorts | MAG | human body | oral cavity |
| RSZYD18187460_A_saliva.metaspades.bin.2  | CNA0070827 | 95.35 | 2.33 | 43.89 | 91.01 | TRUE | 619,869 | 668 | 631 | 38  | Chinese cohorts | MAG | human body | oral cavity |
| RSZYD18187466_A_saliva.metaspades.bin.39 | CNA0070829 | 93.02 | 0    | 43.74 | 91.97 | TRUE | 593,260 | 631 | 593 | 114 | Chinese cohorts | MAG | human body | oral cavity |
| RSZYD18187484_A_saliva.metaspades.bin.51 | CNA0070832 | 97.67 | 2.33 | 42.98 | 91.96 | TRUE | 671,157 | 719 | 680 | 33  | Chinese cohorts | MAG | human body | oral cavity |
| RSZYD18187492_A_saliva.metaspades.bin.15 | CNA0070835 | 100   | 4.65 | 41.26 | 89.11 | TRUE | 651,211 | 643 | 605 | 142 | Chinese cohorts | MAG | human body | oral cavity |
| RSZYD18187500_A_saliva.metaspades.bin.18 | CNA0070839 | 93.02 | 4.65 | 43.90 | 92.41 | TRUE | 664,964 | 726 | 695 | 19  | Chinese cohorts | MAG | human body | oral cavity |
| RSZYD18187503_A_saliva.metaspades.bin.19 | CNA0070842 | 100   | 4.65 | 41.14 | 90.26 | TRUE | 741,535 | 694 | 659 | 119 | Chinese cohorts | MAG | human body | oral cavity |
| RSZYD18187503_A_saliva.metaspades.bin.53 | CNA0070845 | 97.67 | 0    | 41.30 | 89.13 | TRUE | 780,628 | 747 | 701 | 11  | Chinese cohorts | MAG | human body | oral cavity |
| RSZYD18187508_A_saliva.metaspades.bin.8  | CNA0070847 | 97.67 | 2.33 | 43.59 | 91.20 | TRUE | 695,772 | 739 | 698 | 34  | Chinese cohorts | MAG | human body | oral cavity |
| RSZYD18187511_A_saliva.metaspades.bin.2  | CNA0070850 | 93.02 | 0    | 43.68 | 91.49 | TRUE | 636,210 | 700 | 661 | 29  | Chinese cohorts | MAG | human body | oral cavity |
| RSZYD18187514_A_saliva.metaspades.bin.23 | CNA0070853 | 100   | 0    | 43.15 | 91.24 | TRUE | 762,415 | 833 | 785 | 24  | Chinese cohorts | MAG | human body | oral cavity |
| RSZYD18187520_A_saliva.metaspades.bin.22 | CNA0070856 | 97.67 | 0    | 43.45 | 91.22 | TRUE | 676,018 | 739 | 694 | 28  | Chinese cohorts | MAG | human body | oral cavity |
| RSZYD18187537_A_saliva.metaspades.bin.34 | CNA0070859 | 100   | 0    | 36.43 | 90.80 | TRUE | 649,457 | 677 | 640 | 44  | Chinese cohorts | MAG | human body | oral cavity |
| RSZYD18187537_A_saliva.metaspades.bin.50 | CNA0070863 | 97.67 | 0    | 41.15 | 89.20 | TRUE | 810,263 | 794 | 749 | 7   | Chinese cohorts | MAG | human body | oral cavity |
| RSZYD18187540_A_saliva.metaspades.bin.35 | CNA0070865 | 97.67 | 4.65 | 43.31 | 91.47 | TRUE | 745,226 | 792 | 749 | 87  | Chinese cohorts | MAG | human body | oral cavity |
| RSZYD18187542_A_saliva.metaspades.bin.26 | CNA0070868 | 95.35 | 2.33 | 43.25 | 91.27 | TRUE | 525,499 | 564 | 527 | 152 | Chinese cohorts | MAG | human body | oral cavity |
| RSZYD18187554_A_saliva.metaspades.bin.21 | CNA0070871 | 100   | 2.33 | 43.17 | 91.59 | TRUE | 733,055 | 779 | 733 | 4   | Chinese cohorts | MAG | human body | oral cavity |
| RSZYD18187556_A_saliva.metaspades.bin.16 | CNA0070874 | 100   | 0    | 43.21 | 91.22 | TRUE | 750,978 | 846 | 800 | 68  | Chinese cohorts | MAG | human body | oral cavity |
| RSZYD18187586_A_saliva.metaspades.bin.38 | CNA0070877 | 97.67 | 2.33 | 43.40 | 91.18 | TRUE | 697,037 | 756 | 711 | 53  | Chinese cohorts | MAG | human body | oral cavity |
| RSZYD18187591_A_saliva.metaspades.bin.33 | CNA0070881 | 100   | 2.33 | 43.13 | 91.36 | TRUE | 721,538 | 783 | 738 | 21  | Chinese cohorts | MAG | human body | oral cavity |
| RSZYD18187595_A_saliva.metaspades.bin.7  | CNA0070883 | 95.35 | 0    | 43.17 | 92.12 | TRUE | 699,157 | 761 | 720 | 30  | Chinese cohorts | MAG | human body | oral cavity |
| RSZYD18187596_A_saliva.metaspades.bin.23 | CNA0070886 | 95.35 | 2.33 | 43.68 | 91.09 | TRUE | 641,603 | 692 | 650 | 59  | Chinese cohorts | MAG | human body | oral cavity |
| RSZYD18187612_A_saliva.metaspades.bin.12 | CNA0070890 | 100   | 0    | 43.27 | 91.12 | TRUE | 730,703 | 784 | 738 | 5   | Chinese cohorts | MAG | human body | oral cavity |
| RSZYD18187613_A_saliva.metaspades.bin.34 | CNA0070893 | 95.35 | 0    | 43.82 | 92.33 | TRUE | 477,114 | 513 | 484 | 138 | Chinese cohorts | MAG | human body | oral cavity |
| RSZYD18187614_A_saliva.metaspades.bin.13 | CNA0070896 | 95.35 | 2.33 | 36.37 | 91.42 | TRUE | 623,427 | 647 | 615 | 136 | Chinese cohorts | MAG | human body | oral cavity |
| RSZYD18187626_A_saliva.metaspades.bin.21 | CNA0070899 | 97.67 | 2.33 | 43.28 | 91.80 | TRUE | 699,574 | 747 | 699 | 31  | Chinese cohorts | MAG | human body | oral cavity |
| RSZYD18187631_A_saliva.metaspades.bin.12 | CNA0070902 | 95.35 | 2.33 | 43.39 | 91.99 | TRUE | 687,748 | 737 | 700 | 118 | Chinese cohorts | MAG | human body | oral cavity |
| RSZYD18187640_A_saliva.metaspades.bin.22 | CNA0070905 | 95.35 | 4.65 | 43.25 | 91.44 | TRUE | 754,177 | 803 | 763 | 97  | Chinese cohorts | MAG | human body | oral cavity |
| RSZYD18187650_A_saliva.metaspades.bin.9  | CNA0070908 | 95.35 | 2.33 | 43.18 | 91.47 | TRUE | 731,616 | 793 | 749 | 76  | Chinese cohorts | MAG | human body | oral cavity |
| RSZYD18187652_A_saliva.metaspades.bin.2  | CNA0070911 | 90.7  | 2.33 | 41.31 | 89.01 | TRUE | 666,339 | 655 | 616 | 160 | Chinese cohorts | MAG | human body | oral cavity |
| RSZYD18187656_A_saliva.metaspades.bin.41 | CNA0070914 | 100   | 0    | 43.34 | 91.83 | TRUE | 696,156 | 765 | 721 | 44  | Chinese cohorts | MAG | human body | oral cavity |
| RSZYD18187663_A_saliva.metaspades.bin.60 | CNA0070918 | 93.02 | 0    | 35.48 | 90.77 | TRUE | 623,982 | 647 | 613 | 49  | Chinese cohorts | MAG | human body | oral cavity |
| RSZYD18187666_A_saliva.metaspades.bin.39 | CNA0070921 | 90.7  | 2.33 | 50.73 | 89.52 | TRUE | 745,149 | 720 | 675 | 81  | Chinese cohorts | MAG | human body | oral cavity |
| RSZYD18187669_A_saliva.metaspades.bin.34 | CNA0070924 | 100   | 0    | 43.59 | 90.99 | TRUE | 659,037 | 707 | 665 | 19  | Chinese cohorts | MAG | human body | oral cavity |
| RSZYD18187676_A_saliva.metaspades.bin.32 | CNA0070927 | 100   | 0    | 43.14 | 91.94 | TRUE | 752,021 | 825 | 780 | 4   | Chinese cohorts | MAG | human body | oral cavity |
| RSZYD18187690_A_saliva.metaspades.bin.20 | CNA0070930 | 97.67 | 0    | 43.08 | 91.66 | TRUE | 677,939 | 740 | 698 | 48  | Chinese cohorts | MAG | human body | oral cavity |
| RSZYD18187690_A_saliva.metaspades.bin.43 | CNA0070934 | 100   | 2.33 | 40.92 | 88.72 | TRUE | 753,748 | 741 | 695 | 40  | Chinese cohorts | MAG | human body | oral cavity |
| RSZYD18187694_A_saliva.metaspades.bin.6  | CNA0070937 | 97.67 | 4.65 | 43.15 | 91.61 | TRUE | 725,313 | 785 | 742 | 74  | Chinese cohorts | MAG | human body | oral cavity |
| RSZYD18187707_A_saliva.metaspades.bin.26 | CNA0070941 | 97.67 | 2.33 | 43.24 | 91.67 | TRUE | 717,822 | 778 | 733 | 31  | Chinese cohorts | MAG | human body | oral cavity |
| RSZYD18187707_A_saliva.metaspades.bin.80 | CNA0070944 | 100   | 0    | 40.37 | 90.00 | TRUE | 783,869 | 740 | 696 | 110 | Chinese cohorts | MAG | human body | oral cavity |
| RSZYD18187711_A_saliva.metaspades.bin.3  | CNA0070948 | 93.02 | 2.33 | 35.93 | 90.51 | TRUE | 583,010 | 598 | 568 | 112 | Chinese cohorts | MAG | human body | oral cavity |
| RSZYD18187715_A_saliva.metaspades.bin.33 | CNA0070952 | 100   | 0    | 43.10 | 91.11 | TRUE | 743,545 | 795 | 749 | 17  | Chinese cohorts | MAG | human body | oral cavity |
| RSZYD18187722_A_saliva.metaspades.bin.7  | CNA0070955 | 97.67 | 4.65 | 43.36 | 91.96 | TRUE | 750,415 | 808 | 765 | 38  | Chinese cohorts | MAG | human body | oral cavity |
| RSZYD18187758_A_saliva.metaspades.bin.70 | CNA0070968 | 100   | 2.33 | 35.34 | 89.18 | TRUE | 648,833 | 668 | 626 | 5   | Chinese cohorts | MAG | human body | oral cavity |
| RSZYD18187760_A_saliva.metaspades.bin.26 | CNA0070971 | 100   | 2.33 | 43.30 | 91.86 | TRUE | 721,336 | 775 | 729 | 10  | Chinese cohorts | MAG | human body | oral cavity |
| RSZYD18187762_A_saliva.metaspades.bin.45 | CNA0070974 | 100   | 0    | 43.25 | 91.54 | TRUE | 733,259 | 788 | 741 | 4   | Chinese cohorts | MAG | human body | oral cavity |
| RSZYD18187773_A_saliva.metaspades.bin.68 | CNA0070978 | 90.7  | 2.33 | 43.87 | 92.30 | TRUE | 591,666 | 616 | 586 | 83  | Chinese cohorts | MAG | human body | oral cavity |
| RSZYD18187790_A_saliva.metaspades.bin.2  | CNA0070981 | 97.67 | 0    | 41.21 | 89.40 | TRUE | 821,414 | 814 | 767 | 13  | Chinese cohorts | MAG | human body | oral cavity |

|                                          |            |       |      |       |       |      |           |      |      |     |                 |     |            |             |
|------------------------------------------|------------|-------|------|-------|-------|------|-----------|------|------|-----|-----------------|-----|------------|-------------|
| RSZYD18187790_A_saliva.metaspades.bin.35 | CNA0070984 | 100   | 0    | 42.98 | 90.78 | TRUE | 745,787   | 813  | 767  | 37  | Chinese cohorts | MAG | human body | oral cavity |
| RSZYD18187792_A_saliva.metaspades.bin.31 | CNA0070987 | 95.35 | 0    | 43.66 | 91.38 | TRUE | 632,805   | 679  | 642  | 50  | Chinese cohorts | MAG | human body | oral cavity |
| RSZYD18187801_A_saliva.metaspades.bin.74 | CNA0070990 | 97.67 | 0    | 36.40 | 90.67 | TRUE | 629,743   | 659  | 618  | 51  | Chinese cohorts | MAG | human body | oral cavity |
| RSZYD18187801_A_saliva.metaspades.bin.75 | CNA0070993 | 97.67 | 4.65 | 47.85 | 91.24 | TRUE | 802,908   | 861  | 817  | 66  | Chinese cohorts | MAG | human body | oral cavity |
| RSZYD18187823_A_saliva.metaspades.bin.19 | CNA0070997 | 93.02 | 0    | 43.75 | 91.63 | TRUE | 570,776   | 617  | 582  | 101 | Chinese cohorts | MAG | human body | oral cavity |
| RSZYD18187841_A_saliva.metaspades.bin.58 | CNA0071000 | 100   | 2.33 | 43.03 | 90.92 | TRUE | 740,881   | 811  | 763  | 22  | Chinese cohorts | MAG | human body | oral cavity |
| RSZYD18187848_A_saliva.metaspades.bin.3  | CNA0071003 | 90.7  | 0    | 43.42 | 92.03 | TRUE | 576,715   | 645  | 618  | 181 | Chinese cohorts | MAG | human body | oral cavity |
| RSZYD18187852_A_saliva.metaspades.bin.38 | CNA0071006 | 97.67 | 2.33 | 42.88 | 91.58 | TRUE | 688,315   | 725  | 680  | 13  | Chinese cohorts | MAG | human body | oral cavity |
| RSZYD18187853_A_saliva.metaspades.bin.37 | CNA0071009 | 100   | 0    | 43.26 | 91.48 | TRUE | 741,835   | 800  | 753  | 5   | Chinese cohorts | MAG | human body | oral cavity |
| RSZYD18187862_A_saliva.metaspades.bin.43 | CNA0071013 | 97.67 | 0    | 43.24 | 91.49 | TRUE | 710,035   | 743  | 701  | 90  | Chinese cohorts | MAG | human body | oral cavity |
| RSZYD18187874_A_saliva.metaspades.bin.29 | CNA0071016 | 90.7  | 4.65 | 43.57 | 91.29 | TRUE | 748,168   | 807  | 758  | 88  | Chinese cohorts | MAG | human body | oral cavity |
| RSZYD18187899_A_saliva.metaspades.bin.64 | CNA0071019 | 90.7  | 2.33 | 43.56 | 92.01 | TRUE | 548,565   | 591  | 564  | 127 | Chinese cohorts | MAG | human body | oral cavity |
| RSZYD18187903_A_saliva.metaspades.bin.45 | CNA0071022 | 100   | 0    | 43.08 | 91.16 | TRUE | 727,786   | 779  | 732  | 12  | Chinese cohorts | MAG | human body | oral cavity |
| RSZYD18187907_A_saliva.metaspades.bin.32 | CNA0071025 | 100   | 2.33 | 43.24 | 91.14 | TRUE | 710,481   | 792  | 748  | 65  | Chinese cohorts | MAG | human body | oral cavity |
| RSZYD18187911_A_saliva.metaspades.bin.37 | CNA0071028 | 100   | 0    | 43.19 | 91.77 | TRUE | 686,938   | 735  | 689  | 4   | Chinese cohorts | MAG | human body | oral cavity |
| RSZYD18187914_A_saliva.metaspades.bin.1  | CNA0071031 | 93.02 | 0    | 43.20 | 90.82 | TRUE | 678,486   | 751  | 705  | 50  | Chinese cohorts | MAG | human body | oral cavity |
| RSZYD18187916_A_saliva.metaspades.bin.50 | CNA0071035 | 90.7  | 4.65 | 43.14 | 92.33 | TRUE | 719,459   | 778  | 744  | 125 | Chinese cohorts | MAG | human body | oral cavity |
| RSZYD18187920_A_saliva.metaspades.bin.29 | CNA0071038 | 97.67 | 0    | 43.37 | 92.87 | TRUE | 693,056   | 724  | 685  | 69  | Chinese cohorts | MAG | human body | oral cavity |
| R0170300050_tooth_RA.megahit.bin.47      | CNA0070976 | 97.67 | 4.65 | 37.75 | 91.27 | TRUE | 678,771   | 691  | 656  | 37  | Chinese cohorts | MAG | human body | oral cavity |
| R0170300051_tooth_RA.megahit.bin.53      | CNA0070977 | 100   | 0    | 52.03 | 86.10 | TRUE | 1,019,027 | 1046 | 1000 | 8   | Chinese cohorts | MAG | human body | oral cavity |
| R0170300051_tooth_RA.megahit.bin.56      | CNA0070979 | 90.7  | 0    | 50.73 | 89.95 | TRUE | 646,745   | 571  | 535  | 51  | Chinese cohorts | MAG | human body | oral cavity |
| R0170300051_tooth_RA.megahit.bin.6       | CNA0070980 | 90.7  | 0    | 38.85 | 89.59 | TRUE | 547,006   | 546  | 511  | 5   | Chinese cohorts | MAG | human body | oral cavity |
| R0170300051_tooth_RA.megahit.bin.71      | CNA0070982 | 97.67 | 2.33 | 38.25 | 90.55 | TRUE | 790,024   | 809  | 765  | 35  | Chinese cohorts | MAG | human body | oral cavity |
| R0170300052_tooth_RA.megahit.bin.177     | CNA0070983 | 100   | 4.65 | 48.86 | 90.40 | TRUE | 851,197   | 884  | 839  | 22  | Chinese cohorts | MAG | human body | oral cavity |
| R0170300052_tooth_RA.megahit.bin.29      | CNA0070985 | 100   | 2.33 | 38.17 | 90.97 | TRUE | 798,007   | 817  | 772  | 30  | Chinese cohorts | MAG | human body | oral cavity |
| R0170300053_tooth_RA.megahit.bin.84      | CNA0070986 | 100   | 2.33 | 47.08 | 88.46 | TRUE | 961,130   | 994  | 947  | 50  | Chinese cohorts | MAG | human body | oral cavity |
| R0170300055_tooth_RA.megahit.bin.26      | CNA0070988 | 93.02 | 0    | 34.50 | 92.05 | TRUE | 581,290   | 537  | 511  | 123 | Chinese cohorts | MAG | human body | oral cavity |
| R0170300055_tooth_RA.megahit.bin.35      | CNA0070989 | 100   | 0    | 39.67 | 89.56 | TRUE | 785,348   | 787  | 740  | 6   | Chinese cohorts | MAG | human body | oral cavity |
| R0170300055_tooth_RA.megahit.bin.5       | CNA0070991 | 100   | 0    | 52.21 | 85.68 | TRUE | 1,001,608 | 1016 | 971  | 11  | Chinese cohorts | MAG | human body | oral cavity |
| R0170300056_tooth_RA.megahit.bin.105     | CNA0070992 | 100   | 0    | 41.63 | 88.68 | TRUE | 782,814   | 740  | 693  | 13  | Chinese cohorts | MAG | human body | oral cavity |
| R0170300056_tooth_RA.megahit.bin.17      | CNA0070994 | 93.02 | 2.33 | 37.86 | 91.69 | TRUE | 735,072   | 747  | 709  | 20  | Chinese cohorts | MAG | human body | oral cavity |
| R0170300057_tooth_RA.megahit.bin.6       | CNA0070995 | 97.67 | 2.33 | 47.96 | 91.27 | TRUE | 649,818   | 694  | 656  | 8   | Chinese cohorts | MAG | human body | oral cavity |
| R0170300060_tooth_RA.megahit.bin.57      | CNA0070996 | 97.67 | 0    | 38.05 | 91.12 | TRUE | 740,249   | 750  | 717  | 7   | Chinese cohorts | MAG | human body | oral cavity |
| R0170300060_tooth_RA.megahit.bin.77      | CNA0070998 | 93.02 | 4.65 | 49.83 | 90.18 | TRUE | 570,985   | 610  | 583  | 12  | Chinese cohorts | MAG | human body | oral cavity |
| R0170300060_tooth_RA.megahit.bin.92      | CNA0070999 | 100   | 2.33 | 46.45 | 90.80 | TRUE | 825,824   | 856  | 813  | 10  | Chinese cohorts | MAG | human body | oral cavity |
| R0170300061_tooth_RA.megahit.bin.113     | CNA0071001 | 97.67 | 0    | 33.96 | 89.79 | TRUE | 725,529   | 729  | 690  | 10  | Chinese cohorts | MAG | human body | oral cavity |
| R0170300061_tooth_RA.megahit.bin.12      | CNA0071002 | 93.02 | 0    | 52.99 | 85.31 | TRUE | 812,055   | 844  | 811  | 14  | Chinese cohorts | MAG | human body | oral cavity |
| R0170300061_tooth_RA.megahit.bin.44      | CNA0071004 | 95.35 | 2.33 | 38.55 | 89.52 | TRUE | 583,024   | 579  | 541  | 22  | Chinese cohorts | MAG | human body | oral cavity |
| R0170300061_tooth_RA.megahit.bin.55      | CNA0071005 | 95.35 | 0    | 35.48 | 91.09 | TRUE | 645,308   | 639  | 598  | 132 | Chinese cohorts | MAG | human body | oral cavity |
| R0170300062_tooth_RA.megahit.bin.52      | CNA0071007 | 90.7  | 0    | 48.10 | 93.31 | TRUE | 640,151   | 695  | 659  | 70  | Chinese cohorts | MAG | human body | oral cavity |
| R0170300062_tooth_RA.megahit.bin.61      | CNA0071008 | 100   | 0    | 52.45 | 85.68 | TRUE | 982,983   | 1003 | 958  | 8   | Chinese cohorts | MAG | human body | oral cavity |
| R0170300062_tooth_RA.megahit.bin.66      | CNA0071010 | 100   | 0    | 38.16 | 91.52 | TRUE | 753,964   | 774  | 735  | 15  | Chinese cohorts | MAG | human body | oral cavity |
| R0170300065_tooth_RA.megahit.bin.77      | CNA0071011 | 95.35 | 0    | 50.99 | 88.71 | TRUE | 720,137   | 685  | 639  | 24  | Chinese cohorts | MAG | human body | oral cavity |
| R0170300065_tooth_RA.megahit.bin.79      | CNA0071012 | 97.67 | 0    | 37.36 | 91.49 | TRUE | 609,399   | 628  | 592  | 11  | Chinese cohorts | MAG | human body | oral cavity |
| R0170300065_tooth_RA.megahit.bin.81      | CNA0071014 | 100   | 2.33 | 48.33 | 91.57 | TRUE | 719,043   | 755  | 713  | 22  | Chinese cohorts | MAG | human body | oral cavity |
| R0170300066_tooth_RA.megahit.bin.70      | CNA0071015 | 100   | 2.33 | 38.22 | 90.35 | TRUE | 765,593   | 799  | 752  | 5   | Chinese cohorts | MAG | human body | oral cavity |
| R0170300067_tooth_RA.megahit.bin.1       | CNA0071017 | 90.7  | 0    | 37.24 | 91.49 | TRUE | 482,333   | 485  | 465  | 5   | Chinese cohorts | MAG | human body | oral cavity |
| R0170300067_tooth_RA.megahit.bin.54      | CNA0071018 | 90.7  | 2.33 | 46.79 | 91.11 | TRUE | 514,582   | 539  | 516  | 64  | Chinese cohorts | MAG | human body | oral cavity |
| R0170300068_tooth_RA.megahit.bin.89      | CNA0071020 | 97.67 | 0    | 37.17 | 91.51 | TRUE | 645,818   | 637  | 605  | 39  | Chinese cohorts | MAG | human body | oral cavity |
| R0170300070_tooth_RA.megahit.bin.58      | CNA0071021 | 100   | 0    | 39.78 | 89.49 | TRUE | 755,232   | 748  | 701  | 12  | Chinese cohorts | MAG | human body | oral cavity |
| R0170300071_tooth_RA.megahit.bin.81      | CNA0071023 | 97.67 | 0    | 47.31 | 91.39 | TRUE | 820,081   | 885  | 844  | 36  | Chinese cohorts | MAG | human body | oral cavity |
| R0170300073_tooth_RA.megahit.bin.46      | CNA0071024 | 93.02 | 0    | 37.92 | 91.04 | TRUE | 699,702   | 722  | 685  | 18  | Chinese cohorts | MAG | human body | oral cavity |
| R0170300075_tooth_RA.megahit.bin.36      | CNA0071026 | 97.67 | 0    | 37.94 | 91.29 | TRUE | 666,814   | 693  | 659  | 12  | Chinese cohorts | MAG | human body | oral cavity |
| R0170300077_tooth_RA.megahit.bin.6       | CNA0071027 | 95.35 | 2.33 | 38.80 | 91.00 | TRUE | 787,367   | 798  | 753  | 8   | Chinese cohorts | MAG | human body | oral cavity |
| R0170300078_tooth_RA.megahit.bin.29      | CNA0071029 | 100   | 0    | 40.19 | 90.26 | TRUE | 679,318   | 674  | 630  | 30  | Chinese cohorts | MAG | human body | oral cavity |
| R0170300078_tooth_RA.megahit.bin.66      | CNA0071030 | 97.67 | 0    | 50.29 | 88.96 | TRUE | 782,597   | 739  | 691  | 21  | Chinese cohorts | MAG | human body | oral cavity |
| R0170300079_tooth_RA.megahit.bin.12      | CNA0071032 | 95.35 | 2.33 | 34.31 | 90.55 | TRUE | 639,454   | 626  | 592  | 83  | Chinese cohorts | MAG | human body | oral cavity |
| R0170300079_tooth_RA.megahit.bin.18      | CNA0071033 | 97.67 | 0    | 39.76 | 89.35 | TRUE | 724,661   | 719  | 678  | 12  | Chinese cohorts | MAG | human body | oral cavity |
| R0170300079_tooth_RA.megahit.bin.64      | CNA0071034 | 95.35 | 2.33 | 37.58 | 90.75 | TRUE | 743,988   | 746  | 697  | 59  | Chinese cohorts | MAG | human body | oral cavity |
| R0170300083_tooth_RA.megahit.bin.110     | CNA0071036 | 97.67 | 0    | 50.51 | 89.55 | TRUE | 767,154   | 724  | 677  | 28  | Chinese cohorts | MAG | human body | oral cavity |
| R0170300092_tooth_RA.megahit.bin.31      | CNA0071037 | 93.02 | 0    | 50.80 | 89.35 | TRUE | 698,174   | 660  | 621  | 38  | Chinese cohorts | MAG | human body | oral cavity |
| R0170300092_tooth_RA.megahit.bin.51      | CNA0071039 | 90.7  | 2.33 | 47.82 | 91.90 | TRUE | 605,619   | 649  | 616  | 71  | Chinese cohorts | MAG | human body | oral cavity |
| R0170300092_tooth_RA.megahit.bin.66      | CNA0071040 | 100   | 0    | 48.45 | 88.97 | TRUE | 706,923   | 716  | 680  | 6   | Chinese cohorts | MAG | human body | oral cavity |
| R0170300092_tooth_RA.megahit.bin.69      | CNA0071041 | 100   | 0    | 51.22 | 92.13 | TRUE | 727,095   | 795  | 757  | 11  | Chinese cohorts | MAG | human body | oral cavity |
| R0170300097_tooth_RA.megahit.bin.57      | CNA0071043 | 100   | 0    | 51.31 | 92.00 | TRUE | 764,510   | 836  | 794  | 7   | Chinese cohorts | MAG | human body | oral cavity |
| R0170300097_tooth_RA.megahit.bin.6       | CNA0071044 | 97.67 | 0    | 38.20 | 90.63 | TRUE | 819,060   | 847  | 807  | 15  | Chinese cohorts | MAG | human body | oral cavity |
| R0170300098_tooth_RA.megahit.bin.129     | CNA0071046 | 100   | 2.33 | 48.96 | 90.55 | TRUE | 807,593   | 844  | 802  | 17  | Chinese cohorts | MAG | human body | oral cavity |
| R0170300098_tooth_RA.megahit.bin.34      | CNA0071047 | 97.67 | 0    | 33.99 | 89.95 | TRUE | 703,586   | 705  | 668  | 12  | Chinese cohorts | MAG | human body | oral cavity |
| R0170300100_tooth_RA.megahit.bin.107     | CNA0071049 | 95.35 | 0    | 37.34 | 91.94 | TRUE | 656,330   | 652  | 618  | 39  | Chinese cohorts | MAG | human body | oral cavity |
| R0170300100_tooth_RA.megahit.bin.115     | CNA0071051 | 100   | 2.33 | 47.49 | 90.79 | TRUE | 807,253   | 870  | 826  | 65  | Chinese cohorts | MAG | human body | oral cavity |
| R0170300100_tooth_RA.megahit.bin.14      | CNA0071052 | 97.67 | 0    | 38.35 | 89.75 | TRUE | 716,761   | 694  | 650  | 19  | Chinese cohorts | MAG | human body | oral cavity |
| R0170300100_tooth_RA.megahit.bin.38      | CNA0071053 | 95.35 | 0    | 50.72 | 89.52 | TRUE | 725,042   | 685  | 644  | 38  | Chinese cohorts | MAG | human body | oral cavity |
| R0170300102_tooth_RA.megahit.bin.20      | CNA0071055 | 97.67 | 4.65 | 48.32 | 91.45 | TRUE | 737,305   | 778  | 735  | 85  | Chinese cohorts | MAG | human body | oral cavity |
| R0170300102_tooth_RA.megahit.bin.26      | CNA0071057 | 100   | 0    | 51.18 | 92.00 | TRUE | 759,325   | 837  | 797  | 7   | Chinese cohorts | MAG | human body | oral cavity |
| R0170300104_tooth_RA.megahit.bin.11      | CNA0071058 | 100   | 2.33 | 52.09 | 86.29 | TRUE | 977,455   | 1000 | 956  | 58  | Chinese cohorts | MAG | human body | oral cavity |
| R0170300104_tooth_RA.megahit.bin.12      | CNA0071060 | 97.67 | 0    | 35.53 | 90.96 | TRUE | 606,516   | 622  | 587  | 34  | Chinese cohorts | MAG | human body | oral cavity |
| R0170300105_tooth_RA.megahit.bin.100     | CNA0071061 | 95.35 | 0    | 34.09 | 90.89 | TRUE | 664,299   | 658  | 626  | 70  | Chinese cohorts | MAG | human body | oral cavity |
| R0170300105_tooth_RA.megahit.bin.119     | CNA0071063 | 100   | 0    | 37.67 | 90.95 | TRUE | 714,806   | 732  | 693  | 30  | Chinese cohorts | MAG | human body | oral cavity |
| R0170300105_tooth_RA.megahit.bin.2       | CNA0071064 | 100   | 2.33 | 39.80 | 89.49 | TRUE | 760,857   | 750  | 700  | 15  | Chinese cohorts | MAG | human body | oral cavity |
| R0170300106_tooth_RA.megahit.bin.39      | CNA0071066 | 97.67 | 0    | 50.30 | 89.18 | TRUE | 819,280   | 764  | 716  | 22  | Chinese cohorts | MAG | human body | oral cavity |
| R0170300106_tooth_RA.megahit.bin.44      | CNA0071067 | 90.7  | 0    | 37.16 | 92.92 | TRUE | 590,779   | 590  | 557  | 38  | Chinese cohorts | MAG | human body | oral cavity |



|                                      |            |       |      |       |       |      |           |      |      |     |                 |     |            |             |
|--------------------------------------|------------|-------|------|-------|-------|------|-----------|------|------|-----|-----------------|-----|------------|-------------|
| R0170300106_tooth_RA.megahit.bin.47  | CNA0071069 | 90.7  | 2.33 | 47.22 | 91.66 | TRUE | 888,444   | 952  | 908  | 9   | Chinese cohorts | MAG | human body | oral cavity |
| R0170300107_tooth_RA.megahit.bin.2   | CNA0071070 | 97.67 | 4.65 | 46.69 | 91.33 | TRUE | 793,987   | 851  | 814  | 51  | Chinese cohorts | MAG | human body | oral cavity |
| R0170300110_tooth_RA.megahit.bin.38  | CNA0071072 | 97.67 | 2.33 | 46.83 | 91.43 | TRUE | 633,002   | 671  | 630  | 16  | Chinese cohorts | MAG | human body | oral cavity |
| R0170300110_tooth_RA.megahit.bin.49  | CNA0071074 | 93.02 | 0    | 50.62 | 90.41 | TRUE | 770,224   | 726  | 680  | 39  | Chinese cohorts | MAG | human body | oral cavity |
| R0170300110_tooth_RA.megahit.bin.53  | CNA0071075 | 90.7  | 2.33 | 50.32 | 92.08 | TRUE | 605,110   | 651  | 619  | 20  | Chinese cohorts | MAG | human body | oral cavity |
| R0170300110_tooth_RA.megahit.bin.64  | CNA0071077 | 97.67 | 0    | 37.97 | 91.21 | TRUE | 766,099   | 777  | 737  | 26  | Chinese cohorts | MAG | human body | oral cavity |
| R0170300110_tooth_RA.megahit.bin.88  | CNA0071078 | 100   | 0    | 39.58 | 89.37 | TRUE | 793,995   | 780  | 733  | 10  | Chinese cohorts | MAG | human body | oral cavity |
| R0170300111_tooth_RA.megahit.bin.32  | CNA0071080 | 95.35 | 0    | 38.16 | 89.42 | TRUE | 663,737   | 659  | 617  | 11  | Chinese cohorts | MAG | human body | oral cavity |
| R0170300111_tooth_RA.megahit.bin.62  | CNA0071081 | 90.7  | 0    | 37.54 | 91.93 | TRUE | 606,592   | 613  | 584  | 76  | Chinese cohorts | MAG | human body | oral cavity |
| R0170300114_tooth_RA.megahit.bin.10  | CNA0071083 | 100   | 0    | 40.02 | 89.64 | TRUE | 727,582   | 716  | 668  | 18  | Chinese cohorts | MAG | human body | oral cavity |
| R0170300114_tooth_RA.megahit.bin.56  | CNA0071084 | 100   | 0    | 51.08 | 85.60 | TRUE | 1,027,850 | 1057 | 1020 | 58  | Chinese cohorts | MAG | human body | oral cavity |
| R0170300114_tooth_RA.megahit.bin.70  | CNA0071086 | 100   | 2.33 | 38.17 | 90.43 | TRUE | 811,411   | 833  | 789  | 22  | Chinese cohorts | MAG | human body | oral cavity |
| R0170300115_tooth_RA.megahit.bin.16  | CNA0071087 | 97.67 | 2.33 | 38.21 | 91.54 | TRUE | 711,318   | 732  | 692  | 20  | Chinese cohorts | MAG | human body | oral cavity |
| R0170300115_tooth_RA.megahit.bin.91  | CNA0071089 | 97.67 | 0    | 50.48 | 88.73 | TRUE | 709,416   | 669  | 624  | 29  | Chinese cohorts | MAG | human body | oral cavity |
| R0170300117_tooth_RA.megahit.bin.12  | CNA0071091 | 90.7  | 2.33 | 49.12 | 91.04 | TRUE | 827,674   | 849  | 807  | 51  | Chinese cohorts | MAG | human body | oral cavity |
| R0170300118_tooth_RA.megahit.bin.3   | CNA0071092 | 100   | 0    | 37.88 | 91.02 | TRUE | 732,621   | 759  | 726  | 7   | Chinese cohorts | MAG | human body | oral cavity |
| R0170300118_tooth_RA.megahit.bin.46  | CNA0071094 | 97.67 | 0    | 35.41 | 90.85 | TRUE | 605,431   | 613  | 576  | 36  | Chinese cohorts | MAG | human body | oral cavity |
| R0170300118_tooth_RA.megahit.bin.74  | CNA0071095 | 93.02 | 0    | 34.39 | 91.45 | TRUE | 620,352   | 601  | 569  | 109 | Chinese cohorts | MAG | human body | oral cavity |
| R0170300119_tooth_RA.megahit.bin.12  | CNA0071097 | 90.7  | 0    | 37.51 | 91.49 | TRUE | 465,935   | 484  | 451  | 8   | Chinese cohorts | MAG | human body | oral cavity |
| R0170300119_tooth_RA.megahit.bin.2   | CNA0071098 | 97.67 | 0    | 33.93 | 89.69 | TRUE | 739,726   | 737  | 696  | 18  | Chinese cohorts | MAG | human body | oral cavity |
| R0170300119_tooth_RA.megahit.bin.84  | CNA0071100 | 95.35 | 4.65 | 46.96 | 90.75 | TRUE | 711,606   | 739  | 699  | 24  | Chinese cohorts | MAG | human body | oral cavity |
| R0170300120_tooth_RA.megahit.bin.106 | CNA0071101 | 100   | 4.65 | 38.03 | 90.97 | TRUE | 774,918   | 815  | 775  | 15  | Chinese cohorts | MAG | human body | oral cavity |
| R0170300120_tooth_RA.megahit.bin.14  | CNA0071103 | 97.67 | 0    | 34.11 | 90.75 | TRUE | 645,715   | 622  | 591  | 81  | Chinese cohorts | MAG | human body | oral cavity |
| R0170300120_tooth_RA.megahit.bin.28  | CNA0071105 | 100   | 0    | 52.34 | 85.71 | TRUE | 996,494   | 1027 | 982  | 3   | Chinese cohorts | MAG | human body | oral cavity |
| R0170300120_tooth_RA.megahit.bin.47  | CNA0071106 | 100   | 2.33 | 46.97 | 91.15 | TRUE | 766,714   | 805  | 765  | 20  | Chinese cohorts | MAG | human body | oral cavity |
| R0170300120_tooth_RA.megahit.bin.52  | CNA0071107 | 95.35 | 0    | 50.96 | 88.74 | TRUE | 726,760   | 690  | 646  | 23  | Chinese cohorts | MAG | human body | oral cavity |
| R0170300120_tooth_RA.megahit.bin.80  | CNA0071109 | 97.67 | 2.33 | 40.01 | 89.94 | TRUE | 752,064   | 746  | 702  | 16  | Chinese cohorts | MAG | human body | oral cavity |
| R0170300121_tooth_RA.megahit.bin.23  | CNA0071111 | 95.35 | 0    | 50.95 | 88.83 | TRUE | 721,399   | 687  | 642  | 25  | Chinese cohorts | MAG | human body | oral cavity |
| R0170300121_tooth_RA.megahit.bin.4   | CNA0071112 | 97.67 | 0    | 38.22 | 89.75 | TRUE | 771,125   | 782  | 735  | 3   | Chinese cohorts | MAG | human body | oral cavity |
| R0170300124_tooth_RA.megahit.bin.51  | CNA0071114 | 90.7  | 0    | 52.38 | 85.04 | TRUE | 893,904   | 911  | 866  | 4   | Chinese cohorts | MAG | human body | oral cavity |
| R0170300125_tooth_RA.megahit.bin.2   | CNA0071115 | 95.35 | 0    | 38.33 | 90.56 | TRUE | 797,039   | 825  | 781  | 12  | Chinese cohorts | MAG | human body | oral cavity |
| R0170300127_tooth_RA.megahit.bin.30  | CNA0071116 | 100   | 0    | 47.15 | 91.62 | TRUE | 928,112   | 991  | 949  | 47  | Chinese cohorts | MAG | human body | oral cavity |
| R0170300127_tooth_RA.megahit.bin.43  | CNA0071118 | 97.67 | 2.33 | 38.38 | 91.48 | TRUE | 825,081   | 808  | 764  | 97  | Chinese cohorts | MAG | human body | oral cavity |
| R0170300127_tooth_RA.megahit.bin.7   | CNA0071119 | 93.02 | 0    | 50.43 | 89.56 | TRUE | 775,222   | 719  | 677  | 25  | Chinese cohorts | MAG | human body | oral cavity |
| R0170300128_tooth_RA.megahit.bin.9   | CNA0071121 | 97.67 | 0    | 47.36 | 91.09 | TRUE | 878,888   | 948  | 901  | 36  | Chinese cohorts | MAG | human body | oral cavity |
| R0170300129_tooth_RA.megahit.bin.17  | CNA0071122 | 97.67 | 0    | 38.03 | 90.82 | TRUE | 812,402   | 845  | 804  | 26  | Chinese cohorts | MAG | human body | oral cavity |
| R0170300129_tooth_RA.megahit.bin.41  | CNA0071124 | 100   | 0    | 40.11 | 90.33 | TRUE | 711,468   | 698  | 651  | 62  | Chinese cohorts | MAG | human body | oral cavity |
| R0170300133_tooth_RA.megahit.bin.23  | CNA0071125 | 97.67 | 4.65 | 46.92 | 91.38 | TRUE | 768,528   | 807  | 771  | 36  | Chinese cohorts | MAG | human body | oral cavity |
| R0170300133_tooth_RA.megahit.bin.51  | CNA0071127 | 95.35 | 0    | 37.16 | 91.08 | TRUE | 646,149   | 647  | 608  | 46  | Chinese cohorts | MAG | human body | oral cavity |
| R0170300133_tooth_RA.megahit.bin.60  | CNA0071128 | 95.35 | 0    | 50.74 | 90.10 | TRUE | 761,796   | 723  | 676  | 27  | Chinese cohorts | MAG | human body | oral cavity |
| R0170300135_tooth_RA.megahit.bin.70  | CNA0071130 | 97.67 | 0    | 38.38 | 89.59 | TRUE | 721,084   | 724  | 663  | 20  | Chinese cohorts | MAG | human body | oral cavity |
| R0170300135_tooth_RA.megahit.bin.76  | CNA0071131 | 93.02 | 0    | 37.55 | 89.84 | TRUE | 551,126   | 581  | 536  | 12  | Chinese cohorts | MAG | human body | oral cavity |
| R0170300135_tooth_RA.megahit.bin.82  | CNA0071133 | 97.67 | 0    | 51.96 | 85.13 | TRUE | 911,380   | 959  | 919  | 31  | Chinese cohorts | MAG | human body | oral cavity |
| R0170300136_tooth_RA.megahit.bin.13  | CNA0071134 | 97.67 | 0    | 49.11 | 90.24 | TRUE | 821,382   | 851  | 809  | 31  | Chinese cohorts | MAG | human body | oral cavity |
| R0170300136_tooth_RA.megahit.bin.20  | CNA0071136 | 95.35 | 0    | 34.38 | 90.39 | TRUE | 617,765   | 602  | 568  | 106 | Chinese cohorts | MAG | human body | oral cavity |
| R0170300136_tooth_RA.megahit.bin.26  | CNA0071137 | 100   | 0    | 50.52 | 89.37 | TRUE | 795,853   | 743  | 696  | 37  | Chinese cohorts | MAG | human body | oral cavity |
| R0170300136_tooth_RA.megahit.bin.71  | CNA0071139 | 100   | 0    | 40.33 | 90.62 | TRUE | 692,881   | 680  | 636  | 61  | Chinese cohorts | MAG | human body | oral cavity |
| R0170300136_tooth_RA.megahit.bin.73  | CNA0071140 | 100   | 0    | 41.66 | 89.49 | TRUE | 745,821   | 718  | 673  | 15  | Chinese cohorts | MAG | human body | oral cavity |
| R0170300136_tooth_RA.megahit.bin.76  | CNA0071142 | 95.35 | 2.33 | 46.88 | 91.42 | TRUE | 704,413   | 740  | 705  | 32  | Chinese cohorts | MAG | human body | oral cavity |
| R0170300136_tooth_RA.megahit.bin.7   | CNA0071143 | 90.7  | 0    | 37.35 | 92.00 | TRUE | 627,084   | 622  | 591  | 46  | Chinese cohorts | MAG | human body | oral cavity |
| R0170300137_tooth_RA.megahit.bin.10  | CNA0071145 | 100   | 0    | 37.99 | 90.29 | TRUE | 765,901   | 792  | 745  | 12  | Chinese cohorts | MAG | human body | oral cavity |
| R0170300137_tooth_RA.megahit.bin.43  | CNA0071147 | 100   | 0    | 51.37 | 85.67 | TRUE | 1,046,012 | 1085 | 1045 | 34  | Chinese cohorts | MAG | human body | oral cavity |
| R0170300137_tooth_RA.megahit.bin.75  | CNA0071148 | 95.35 | 4.65 | 49.70 | 90.34 | TRUE | 715,451   | 760  | 720  | 8   | Chinese cohorts | MAG | human body | oral cavity |
| R0170300139_tooth_RA.megahit.bin.20  | CNA0071150 | 90.7  | 0    | 40.39 | 91.59 | TRUE | 602,052   | 567  | 534  | 74  | Chinese cohorts | MAG | human body | oral cavity |
| R0170300139_tooth_RA.megahit.bin.75  | CNA0071151 | 90.7  | 2.33 | 47.37 | 92.10 | TRUE | 878,560   | 934  | 894  | 40  | Chinese cohorts | MAG | human body | oral cavity |
| R0170300139_tooth_RA.megahit.bin.95  | CNA0071153 | 97.67 | 0    | 50.56 | 89.60 | TRUE | 770,869   | 702  | 656  | 24  | Chinese cohorts | MAG | human body | oral cavity |
| R0170300139_tooth_RA.megahit.bin.99  | CNA0071154 | 95.35 | 0    | 37.25 | 91.38 | TRUE | 675,440   | 691  | 649  | 32  | Chinese cohorts | MAG | human body | oral cavity |
| R0170300141_tooth_RA.megahit.bin.64  | CNA0071155 | 100   | 0    | 37.95 | 90.44 | TRUE | 791,411   | 817  | 772  | 14  | Chinese cohorts | MAG | human body | oral cavity |
| R0170300141_tooth_RA.megahit.bin.72  | CNA0071157 | 100   | 0    | 35.33 | 90.53 | TRUE | 632,432   | 657  | 621  | 11  | Chinese cohorts | MAG | human body | oral cavity |
| R0170300144_tooth_RA.megahit.bin.121 | CNA0071158 | 100   | 4.65 | 37.93 | 90.83 | TRUE | 774,201   | 779  | 738  | 24  | Chinese cohorts | MAG | human body | oral cavity |
| R0170300145_tooth_RA.megahit.bin.1   | CNA0071159 | 97.67 | 0    | 33.93 | 89.89 | TRUE | 741,532   | 755  | 716  | 27  | Chinese cohorts | MAG | human body | oral cavity |
| R0170300145_tooth_RA.megahit.bin.44  | CNA0071161 | 97.67 | 0    | 37.51 | 91.65 | TRUE | 687,156   | 689  | 651  | 26  | Chinese cohorts | MAG | human body | oral cavity |
| R0170300145_tooth_RA.megahit.bin.69  | CNA0071162 | 95.35 | 2.33 | 50.86 | 89.92 | TRUE | 687,331   | 650  | 613  | 52  | Chinese cohorts | MAG | human body | oral cavity |
| R0170300146_tooth_RA.megahit.bin.21  | CNA0071164 | 97.67 | 0    | 34.11 | 90.07 | TRUE | 650,698   | 645  | 608  | 43  | Chinese cohorts | MAG | human body | oral cavity |
| R0170300146_tooth_RA.megahit.bin.30  | CNA0071165 | 97.67 | 0    | 40.24 | 89.78 | TRUE | 766,913   | 738  | 688  | 17  | Chinese cohorts | MAG | human body | oral cavity |
| R0170300146_tooth_RA.megahit.bin.4   | CNA0071167 | 95.35 | 0    | 37.54 | 91.04 | TRUE | 697,954   | 723  | 675  | 28  | Chinese cohorts | MAG | human body | oral cavity |
| R0170300147_tooth_RA.megahit.bin.17  | CNA0071168 | 100   | 4.65 | 47.91 | 91.60 | TRUE | 808,382   | 846  | 803  | 67  | Chinese cohorts | MAG | human body | oral cavity |
| R0170300147_tooth_RA.megahit.bin.4   | CNA0071170 | 100   | 0    | 51.76 | 85.62 | TRUE | 1,029,412 | 1064 | 1019 | 14  | Chinese cohorts | MAG | human body | oral cavity |
| R0170300148_tooth_RA.megahit.bin.111 | CNA0071171 | 97.67 | 0    | 39.89 | 90.08 | TRUE | 717,104   | 706  | 660  | 35  | Chinese cohorts | MAG | human body | oral cavity |
| R0170300148_tooth_RA.megahit.bin.4   | CNA0071173 | 100   | 0    | 37.60 | 90.72 | TRUE | 741,655   | 759  | 717  | 15  | Chinese cohorts | MAG | human body | oral cavity |
| R0170300148_tooth_RA.megahit.bin.83  | CNA0071175 | 95.35 | 0    | 34.39 | 91.44 | TRUE | 633,108   | 594  | 567  | 101 | Chinese cohorts | MAG | human body | oral cavity |
| R0170300149_tooth_RA.megahit.bin.28  | CNA0071176 | 90.7  | 0    | 51.03 | 89.69 | TRUE | 698,502   | 652  | 606  | 46  | Chinese cohorts | MAG | human body | oral cavity |
| R0170300149_tooth_RA.megahit.bin.32  | CNA0071178 | 95.35 | 0    | 52.22 | 86.65 | TRUE | 952,002   | 1010 | 969  | 92  | Chinese cohorts | MAG | human body | oral cavity |
| R0170300150_tooth_RA.megahit.bin.56  | CNA0071179 | 90.7  | 0    | 37.19 | 91.95 | TRUE | 595,471   | 601  | 563  | 36  | Chinese cohorts | MAG | human body | oral cavity |
| R0170300150_tooth_RA.megahit.bin.66  | CNA0071180 | 97.67 | 2.33 | 46.69 | 90.48 | TRUE | 783,794   | 813  | 773  | 15  | Chinese cohorts | MAG | human body | oral cavity |
| R0170300151_tooth_RA.megahit.bin.21  | CNA0071182 | 100   | 0    | 38.14 | 91.35 | TRUE | 720,893   | 735  | 698  | 55  | Chinese cohorts | MAG | human body | oral cavity |
| R0170300151_tooth_RA.megahit.bin.58  | CNA0071183 | 95.35 | 0    | 48.00 | 91.47 | TRUE | 699,230   | 746  | 707  | 57  | Chinese cohorts | MAG | human body | oral cavity |
| R0170300151_tooth_RA.megahit.bin.9   | CNA0071185 | 97.67 | 0    | 34.05 | 89.55 | TRUE | 719,093   | 719  | 679  | 14  | Chinese cohorts | MAG | human body | oral cavity |
| R0170300152_tooth_RA.megahit.bin.50  | CNA0071186 | 97.67 | 0    | 34.23 | 90.78 | TRUE | 613,347   | 585  | 554  | 98  | Chinese cohorts | MAG | human body | oral cavity |
| R0170300152_tooth_RA.megahit.bin.61  | CNA0071187 | 90.7  | 0    | 39.87 | 90.09 | TRUE | 713,809   | 709  | 665  | 28  | Chinese cohorts | MAG | human body | oral cavity |
| R0170300152_tooth_RA.megahit.bin.80  | CNA0071189 | 95.35 | 0    | 37.82 | 92.68 | TRUE | 669,904   | 686  | 648  | 41  | Chinese cohorts | MAG | human body | oral cavity |

|                                      |            |       |      |       |       |      |           |      |      |    |                 |     |            |             |
|--------------------------------------|------------|-------|------|-------|-------|------|-----------|------|------|----|-----------------|-----|------------|-------------|
| R0170300153_tooth_RA.megahit.bin.106 | CNA0071190 | 100   | 0    | 37.56 | 90.28 | TRUE | 694,972   | 713  | 675  | 14 | Chinese cohorts | MAG | human body | oral cavity |
| R0170300154_tooth_RA.megahit.bin.116 | CNA0071192 | 95.35 | 0    | 34.11 | 90.08 | TRUE | 697,557   | 703  | 666  | 31 | Chinese cohorts | MAG | human body | oral cavity |
| R0170300155_tooth_RA.megahit.bin.58  | CNA0071193 | 90.7  | 0    | 50.73 | 89.53 | TRUE | 686,739   | 644  | 603  | 41 | Chinese cohorts | MAG | human body | oral cavity |
| R0170300156_tooth_RA.megahit.bin.76  | CNA0071194 | 97.67 | 2.33 | 44.56 | 92.79 | TRUE | 699,541   | 739  | 706  | 25 | Chinese cohorts | MAG | human body | oral cavity |
| R0170300156_tooth_RA.megahit.bin.91  | CNA0071196 | 97.67 | 0    | 37.76 | 91.17 | TRUE | 649,321   | 659  | 622  | 15 | Chinese cohorts | MAG | human body | oral cavity |
| R0170300157_tooth_RA.megahit.bin.55  | CNA0071197 | 100   | 0    | 51.33 | 92.26 | TRUE | 767,896   | 827  | 785  | 7  | Chinese cohorts | MAG | human body | oral cavity |
| R0170300157_tooth_RA.megahit.bin.74  | CNA0071199 | 95.35 | 4.65 | 49.01 | 90.88 | TRUE | 839,164   | 892  | 850  | 41 | Chinese cohorts | MAG | human body | oral cavity |
| R0170300158_tooth_RA.megahit.bin.24  | CNA0071200 | 97.67 | 0    | 37.90 | 90.87 | TRUE | 724,071   | 737  | 700  | 13 | Chinese cohorts | MAG | human body | oral cavity |
| R0170300159_tooth_RA.megahit.bin.123 | CNA0071201 | 97.67 | 0    | 38.02 | 91.28 | TRUE | 719,590   | 734  | 696  | 28 | Chinese cohorts | MAG | human body | oral cavity |
| R0170300160_tooth_RA.megahit.bin.83  | CNA0071203 | 100   | 4.65 | 52.27 | 86.20 | TRUE | 968,569   | 1029 | 987  | 77 | Chinese cohorts | MAG | human body | oral cavity |
| R0170300161_tooth_RA.megahit.bin.150 | CNA0071204 | 95.35 | 0    | 40.36 | 89.49 | TRUE | 762,407   | 729  | 683  | 11 | Chinese cohorts | MAG | human body | oral cavity |
| R0170300161_tooth_RA.megahit.bin.158 | CNA0071206 | 95.35 | 0    | 39.84 | 89.76 | TRUE | 636,287   | 620  | 583  | 8  | Chinese cohorts | MAG | human body | oral cavity |
| R0170300161_tooth_RA.megahit.bin.38  | CNA0071207 | 97.67 | 2.33 | 37.85 | 90.61 | TRUE | 770,492   | 792  | 753  | 20 | Chinese cohorts | MAG | human body | oral cavity |
| R0170300161_tooth_RA.megahit.bin.41  | CNA0071209 | 97.67 | 0    | 33.98 | 89.60 | TRUE | 718,421   | 716  | 677  | 13 | Chinese cohorts | MAG | human body | oral cavity |
| R0170300161_tooth_RA.megahit.bin.8   | CNA0071210 | 100   | 2.33 | 48.88 | 89.90 | TRUE | 854,343   | 885  | 841  | 20 | Chinese cohorts | MAG | human body | oral cavity |
| R0170300162_tooth_RA.megahit.bin.20  | CNA0071211 | 97.67 | 0    | 37.28 | 90.74 | TRUE | 681,006   | 692  | 650  | 35 | Chinese cohorts | MAG | human body | oral cavity |
| R0170300162_tooth_RA.megahit.bin.4   | CNA0071213 | 97.67 | 0    | 42.34 | 90.91 | TRUE | 765,630   | 789  | 748  | 13 | Chinese cohorts | MAG | human body | oral cavity |
| R0170300162_tooth_RA.megahit.bin.89  | CNA0071214 | 97.67 | 0    | 37.98 | 89.54 | TRUE | 768,022   | 770  | 723  | 2  | Chinese cohorts | MAG | human body | oral cavity |
| R0170300164_tooth_RA.megahit.bin.80  | CNA0071216 | 100   | 0    | 39.68 | 89.67 | TRUE | 807,210   | 804  | 758  | 17 | Chinese cohorts | MAG | human body | oral cavity |
| R0170300165_tooth_RA.megahit.bin.12  | CNA0071217 | 97.67 | 2.33 | 38.05 | 91.06 | TRUE | 819,232   | 839  | 797  | 17 | Chinese cohorts | MAG | human body | oral cavity |
| R0170300165_tooth_RA.megahit.bin.3   | CNA0071218 | 95.35 | 2.33 | 38.31 | 89.42 | TRUE | 706,300   | 683  | 636  | 20 | Chinese cohorts | MAG | human body | oral cavity |
| R0170300169_tooth_RA.megahit.bin.51  | CNA0071220 | 97.67 | 0    | 33.99 | 89.87 | TRUE | 708,148   | 705  | 666  | 26 | Chinese cohorts | MAG | human body | oral cavity |
| R0170300170_tooth_RA.megahit.bin.136 | CNA0071221 | 95.35 | 0    | 50.55 | 88.60 | TRUE | 767,088   | 730  | 680  | 27 | Chinese cohorts | MAG | human body | oral cavity |
| R0170300170_tooth_RA.megahit.bin.155 | CNA0071223 | 100   | 2.33 | 52.09 | 86.04 | TRUE | 1,053,950 | 1081 | 1034 | 11 | Chinese cohorts | MAG | human body | oral cavity |
| R0170300170_tooth_RA.megahit.bin.1   | CNA0071224 | 93.02 | 0    | 37.77 | 90.38 | TRUE | 540,441   | 556  | 535  | 11 | Chinese cohorts | MAG | human body | oral cavity |
| R0170300170_tooth_RA.megahit.bin.6   | CNA0071226 | 100   | 0    | 39.72 | 89.41 | TRUE | 752,311   | 738  | 691  | 7  | Chinese cohorts | MAG | human body | oral cavity |
| R0170300170_tooth_RA.megahit.bin.97  | CNA0071227 | 97.67 | 0    | 33.98 | 89.77 | TRUE | 720,640   | 719  | 678  | 13 | Chinese cohorts | MAG | human body | oral cavity |
| R0170300172_tooth_RA.megahit.bin.52  | CNA0071228 | 93.02 | 2.33 | 51.29 | 89.75 | TRUE | 591,721   | 561  | 523  | 79 | Chinese cohorts | MAG | human body | oral cavity |
| R0170300175_tooth_RA.megahit.bin.20  | CNA0071230 | 95.35 | 0    | 37.93 | 90.75 | TRUE | 782,580   | 799  | 760  | 20 | Chinese cohorts | MAG | human body | oral cavity |
| R0170300176_tooth_RA.megahit.bin.28  | CNA0071231 | 95.35 | 0    | 39.86 | 89.56 | TRUE | 641,089   | 622  | 584  | 5  | Chinese cohorts | MAG | human body | oral cavity |
| R0170300176_tooth_RA.megahit.bin.83  | CNA0071233 | 93.02 | 0    | 50.81 | 89.36 | TRUE | 693,143   | 649  | 609  | 30 | Chinese cohorts | MAG | human body | oral cavity |
| R0170300176_tooth_RA.megahit.bin.97  | CNA0071234 | 97.67 | 0    | 37.67 | 91.11 | TRUE | 702,932   | 724  | 683  | 13 | Chinese cohorts | MAG | human body | oral cavity |
| R0170300178_tooth_RA.megahit.bin.102 | CNA0071236 | 97.67 | 0    | 38.34 | 89.23 | TRUE | 722,867   | 708  | 659  | 14 | Chinese cohorts | MAG | human body | oral cavity |
| R0170300178_tooth_RA.megahit.bin.23  | CNA0071237 | 90.7  | 0    | 50.82 | 89.00 | TRUE | 711,110   | 666  | 625  | 29 | Chinese cohorts | MAG | human body | oral cavity |
| R0170300178_tooth_RA.megahit.bin.65  | CNA0071239 | 97.67 | 2.33 | 47.19 | 88.08 | TRUE | 870,268   | 900  | 858  | 42 | Chinese cohorts | MAG | human body | oral cavity |
| R0170300179_tooth_RA.megahit.bin.15  | CNA0071240 | 100   | 0    | 52.28 | 86.02 | TRUE | 993,910   | 1012 | 968  | 8  | Chinese cohorts | MAG | human body | oral cavity |
| R0170300179_tooth_RA.megahit.bin.1   | CNA0071242 | 97.67 | 0    | 47.09 | 91.28 | TRUE | 739,883   | 789  | 753  | 33 | Chinese cohorts | MAG | human body | oral cavity |
| R0170300181_tooth_RA.megahit.bin.83  | CNA0071243 | 100   | 0    | 48.62 | 89.13 | TRUE | 714,301   | 724  | 688  | 10 | Chinese cohorts | MAG | human body | oral cavity |
| R0170300181_tooth_RA.megahit.bin.88  | CNA0071245 | 95.35 | 0    | 37.96 | 92.24 | TRUE | 688,953   | 686  | 652  | 41 | Chinese cohorts | MAG | human body | oral cavity |
| R0170300181_tooth_RA.megahit.bin.96  | CNA0071246 | 90.7  | 0    | 38.56 | 90.28 | TRUE | 594,634   | 585  | 549  | 26 | Chinese cohorts | MAG | human body | oral cavity |
| R0170300182_tooth_RA.megahit.bin.100 | CNA0071248 | 97.67 | 0    | 50.31 | 89.75 | TRUE | 828,422   | 765  | 717  | 31 | Chinese cohorts | MAG | human body | oral cavity |
| R0170300183_tooth_RA.megahit.bin.33  | CNA0071249 | 93.02 | 0    | 51.08 | 89.28 | TRUE | 679,915   | 636  | 595  | 20 | Chinese cohorts | MAG | human body | oral cavity |
| R0170300183_tooth_RA.megahit.bin.5   | CNA0071251 | 100   | 2.33 | 46.72 | 90.92 | TRUE | 809,186   | 854  | 814  | 11 | Chinese cohorts | MAG | human body | oral cavity |
| R0170300184_tooth_RA.megahit.bin.85  | CNA0071252 | 95.35 | 0    | 39.78 | 89.51 | TRUE | 739,293   | 734  | 689  | 12 | Chinese cohorts | MAG | human body | oral cavity |
| R0170300185_tooth_RA.megahit.bin.44  | CNA0071254 | 90.7  | 0    | 50.59 | 89.63 | TRUE | 697,004   | 669  | 625  | 24 | Chinese cohorts | MAG | human body | oral cavity |
| R0170300187_tooth_RA.megahit.bin.41  | CNA0071255 | 93.02 | 0    | 50.84 | 89.00 | TRUE | 733,873   | 698  | 649  | 25 | Chinese cohorts | MAG | human body | oral cavity |
| R0170300187_tooth_RA.megahit.bin.57  | CNA0071257 | 97.67 | 2.33 | 37.90 | 90.90 | TRUE | 722,590   | 737  | 700  | 30 | Chinese cohorts | MAG | human body | oral cavity |
| R0170300189_tooth_RA.megahit.bin.1   | CNA0071258 | 97.67 | 0    | 52.05 | 85.76 | TRUE | 962,529   | 991  | 949  | 11 | Chinese cohorts | MAG | human body | oral cavity |
| R0170300189_tooth_RA.megahit.bin.69  | CNA0071259 | 100   | 0    | 46.95 | 91.37 | TRUE | 996,730   | 1070 | 1021 | 29 | Chinese cohorts | MAG | human body | oral cavity |
| R0170300190_tooth_RA.megahit.bin.12  | CNA0071261 | 90.7  | 0    | 37.21 | 92.11 | TRUE | 636,118   | 643  | 604  | 34 | Chinese cohorts | MAG | human body | oral cavity |
| R0170300192_tooth_RA.megahit.bin.38  | CNA0071262 | 97.67 | 0    | 38.26 | 89.29 | TRUE | 678,914   | 673  | 629  | 52 | Chinese cohorts | MAG | human body | oral cavity |
| R0170300192_tooth_RA.megahit.bin.84  | CNA0071264 | 97.67 | 0    | 37.81 | 91.61 | TRUE | 719,218   | 732  | 694  | 16 | Chinese cohorts | MAG | human body | oral cavity |
| R0170300193_tooth_RA.megahit.bin.57  | CNA0071265 | 97.67 | 0    | 37.39 | 90.72 | TRUE | 648,846   | 669  | 634  | 14 | Chinese cohorts | MAG | human body | oral cavity |
| R0170300193_tooth_RA.megahit.bin.67  | CNA0071267 | 95.35 | 0    | 34.16 | 89.80 | TRUE | 717,885   | 721  | 682  | 17 | Chinese cohorts | MAG | human body | oral cavity |
| R0170300193_tooth_RA.megahit.bin.72  | CNA0071268 | 100   | 4.65 | 47.89 | 91.02 | TRUE | 837,223   | 888  | 844  | 39 | Chinese cohorts | MAG | human body | oral cavity |
| R0170300194_tooth_RA.megahit.bin.108 | CNA0071270 | 97.67 | 0    | 34.08 | 90.09 | TRUE | 692,518   | 685  | 647  | 40 | Chinese cohorts | MAG | human body | oral cavity |
| R0170300194_tooth_RA.megahit.bin.111 | CNA0071271 | 97.67 | 2.33 | 47.73 | 90.81 | TRUE | 844,565   | 899  | 855  | 51 | Chinese cohorts | MAG | human body | oral cavity |
| R0170300194_tooth_RA.megahit.bin.127 | CNA0071273 | 100   | 2.33 | 48.92 | 90.34 | TRUE | 850,292   | 883  | 838  | 14 | Chinese cohorts | MAG | human body | oral cavity |
| R0170300194_tooth_RA.megahit.bin.76  | CNA0071274 | 97.67 | 2.33 | 37.69 | 90.60 | TRUE | 663,915   | 686  | 649  | 20 | Chinese cohorts | MAG | human body | oral cavity |
| R0170300195_tooth_RA.megahit.bin.89  | CNA0071276 | 97.67 | 2.33 | 38.06 | 91.09 | TRUE | 791,638   | 801  | 758  | 25 | Chinese cohorts | MAG | human body | oral cavity |
| R0170300196_tooth_RA.megahit.bin.11  | CNA0071277 | 100   | 0    | 52.11 | 86.09 | TRUE | 1,003,546 | 1026 | 983  | 5  | Chinese cohorts | MAG | human body | oral cavity |
| R0170300196_tooth_RA.megahit.bin.46  | CNA0071278 | 97.67 | 4.65 | 46.90 | 90.40 | TRUE | 732,188   | 778  | 741  | 13 | Chinese cohorts | MAG | human body | oral cavity |
| R0170300197_tooth_RA.megahit.bin.71  | CNA0071280 | 95.35 | 0    | 48.26 | 93.17 | TRUE | 742,551   | 797  | 760  | 18 | Chinese cohorts | MAG | human body | oral cavity |
| R0170300198_tooth_RA.megahit.bin.28  | CNA0071281 | 100   | 2.33 | 47.15 | 91.26 | TRUE | 964,689   | 1053 | 1006 | 17 | Chinese cohorts | MAG | human body | oral cavity |
| R0170300199_tooth_RA.megahit.bin.62  | CNA0071283 | 100   | 0    | 52.19 | 85.60 | TRUE | 1,032,985 | 1054 | 1005 | 4  | Chinese cohorts | MAG | human body | oral cavity |
| R0170300200_tooth_RA.megahit.bin.29  | CNA0071284 | 93.02 | 0    | 50.95 | 88.88 | TRUE | 697,447   | 649  | 605  | 47 | Chinese cohorts | MAG | human body | oral cavity |
| R0170300200_tooth_RA.megahit.bin.49  | CNA0071286 | 90.7  | 0    | 37.08 | 92.73 | TRUE | 600,104   | 607  | 575  | 43 | Chinese cohorts | MAG | human body | oral cavity |
| R0170300200_tooth_RA.megahit.bin.64  | CNA0071287 | 95.35 | 2.33 | 47.55 | 87.78 | TRUE | 840,335   | 884  | 846  | 49 | Chinese cohorts | MAG | human body | oral cavity |
| R0170300202_tooth_RA.megahit.bin.34  | CNA0071289 | 100   | 0    | 37.60 | 91.06 | TRUE | 671,011   | 691  | 654  | 10 | Chinese cohorts | MAG | human body | oral cavity |
| R0170300202_tooth_RA.megahit.bin.65  | CNA0071290 | 100   | 0    | 39.65 | 89.33 | TRUE | 765,406   | 759  | 710  | 12 | Chinese cohorts | MAG | human body | oral cavity |
| R0170300202_tooth_RA.megahit.bin.78  | CNA0071292 | 100   | 2.33 | 49.07 | 90.69 | TRUE | 862,008   | 899  | 855  | 7  | Chinese cohorts | MAG | human body | oral cavity |
| R0170300203_tooth_RA.megahit.bin.29  | CNA0071293 | 90.7  | 0    | 51.02 | 89.56 | TRUE | 684,142   | 634  | 591  | 22 | Chinese cohorts | MAG | human body | oral cavity |
| R0170300203_tooth_RA.megahit.bin.90  | CNA0071295 | 97.67 | 0    | 38.38 | 89.48 | TRUE | 755,745   | 762  | 713  | 16 | Chinese cohorts | MAG | human body | oral cavity |
| R0170300203_tooth_RA.megahit.bin.94  | CNA0071296 | 95.35 | 2.33 | 52.48 | 86.00 | TRUE | 874,567   | 896  | 856  | 25 | Chinese cohorts | MAG | human body | oral cavity |
| R0170300203_tooth_RA.megahit.bin.96  | CNA0071298 | 100   | 0    | 38.25 | 90.94 | TRUE | 864,543   | 899  | 858  | 9  | Chinese cohorts | MAG | human body | oral cavity |
| R0170300204_tooth_RA.megahit.bin.65  | CNA0071299 | 90.7  | 2.33 | 49.29 | 90.20 | TRUE | 654,476   | 691  | 647  | 15 | Chinese cohorts | MAG | human body | oral cavity |
| R0170300204_tooth_RA.megahit.bin.78  | CNA0071301 | 93.02 | 0    | 39.56 | 90.01 | TRUE | 750,716   | 748  | 707  | 29 | Chinese cohorts | MAG | human body | oral cavity |
| R0170300205_tooth_RA.megahit.bin.38  | CNA0071302 | 97.67 | 0    | 50.51 | 89.08 | TRUE | 803,700   | 754  | 706  | 22 | Chinese cohorts | MAG | human body | oral cavity |
| R0170300205_tooth_RA.megahit.bin.8   | CNA0071303 | 95.35 | 0    | 38.18 | 89.87 | TRUE | 678,491   | 669  | 624  | 6  | Chinese cohorts | MAG | human body | oral cavity |
| R0170300206_tooth_RA.megahit.bin.2   | CNA0071305 | 90.7  | 0    | 38.31 | 90.01 | TRUE | 659,194   | 644  | 601  | 6  | Chinese cohorts | MAG | human body | oral cavity |
| R0170300206_tooth_RA.megahit.bin.6   | CNA0071307 | 97.67 | 0    | 50.61 | 89.51 | TRUE | 763,220   | 714  | 667  | 18 | Chinese cohorts | MAG | human body | oral cavity |



|                                      |            |       |      |       |       |      |           |      |      |     |                 |     |            |             |
|--------------------------------------|------------|-------|------|-------|-------|------|-----------|------|------|-----|-----------------|-----|------------|-------------|
| R0170300207_tooth_RA.megahit.bin.21  | CNA0071308 | 97.67 | 0    | 34.03 | 89.34 | TRUE | 728,010   | 728  | 687  | 11  | Chinese cohorts | MAG | human body | oral cavity |
| R0170300207_tooth_RA.megahit.bin.65  | CNA0071310 | 90.7  | 0    | 51.04 | 88.92 | TRUE | 645,763   | 606  | 567  | 38  | Chinese cohorts | MAG | human body | oral cavity |
| R0170300208_tooth_RA.megahit.bin.25  | CNA0071311 | 93.02 | 2.33 | 48.80 | 91.23 | TRUE | 628,658   | 702  | 663  | 10  | Chinese cohorts | MAG | human body | oral cavity |
| R0170300208_tooth_RA.megahit.bin.27  | CNA0071313 | 100   | 0    | 40.15 | 89.79 | TRUE | 656,776   | 644  | 598  | 33  | Chinese cohorts | MAG | human body | oral cavity |
| R0170300208_tooth_RA.megahit.bin.73  | CNA0071314 | 90.7  | 0    | 37.20 | 91.09 | TRUE | 633,001   | 641  | 610  | 12  | Chinese cohorts | MAG | human body | oral cavity |
| R0170300208_tooth_RA.megahit.bin.81  | CNA0071316 | 95.35 | 0    | 34.02 | 89.74 | TRUE | 717,453   | 723  | 683  | 10  | Chinese cohorts | MAG | human body | oral cavity |
| R0170300210_tooth_RA.megahit.bin.1   | CNA0071317 | 97.67 | 0    | 37.40 | 91.42 | TRUE | 665,467   | 677  | 647  | 17  | Chinese cohorts | MAG | human body | oral cavity |
| R0170300210_tooth_RA.megahit.bin.95  | CNA0071319 | 95.35 | 2.33 | 49.87 | 90.83 | TRUE | 701,329   | 749  | 707  | 12  | Chinese cohorts | MAG | human body | oral cavity |
| R0170300211_tooth_RA.megahit.bin.13  | CNA0071320 | 95.35 | 2.33 | 36.74 | 89.59 | TRUE | 707,886   | 682  | 636  | 45  | Chinese cohorts | MAG | human body | oral cavity |
| R0170300211_tooth_RA.megahit.bin.23  | CNA0071322 | 97.67 | 0    | 34.08 | 89.44 | TRUE | 723,448   | 732  | 689  | 13  | Chinese cohorts | MAG | human body | oral cavity |
| R0170300212_tooth_RA.megahit.bin.57  | CNA0071323 | 93.02 | 0    | 33.97 | 90.16 | TRUE | 713,190   | 714  | 674  | 64  | Chinese cohorts | MAG | human body | oral cavity |
| R0170300213_tooth_RA.megahit.bin.11  | CNA0071325 | 93.02 | 0    | 42.77 | 91.30 | TRUE | 653,453   | 651  | 616  | 19  | Chinese cohorts | MAG | human body | oral cavity |
| R0170300213_tooth_RA.megahit.bin.121 | CNA0071326 | 97.67 | 0    | 35.11 | 90.48 | TRUE | 613,996   | 628  | 592  | 6   | Chinese cohorts | MAG | human body | oral cavity |
| R0170300213_tooth_RA.megahit.bin.30  | CNA0071328 | 93.02 | 2.33 | 51.58 | 91.16 | TRUE | 837,733   | 896  | 858  | 18  | Chinese cohorts | MAG | human body | oral cavity |
| R0170300213_tooth_RA.megahit.bin.4   | CNA0071329 | 97.67 | 0    | 34.10 | 89.94 | TRUE | 667,758   | 666  | 632  | 46  | Chinese cohorts | MAG | human body | oral cavity |
| R0170300213_tooth_RA.megahit.bin.95  | CNA0071331 | 95.35 | 0    | 37.60 | 91.04 | TRUE | 736,231   | 751  | 709  | 30  | Chinese cohorts | MAG | human body | oral cavity |
| R0170300214_tooth_RA.megahit.bin.54  | CNA0071332 | 93.02 | 0    | 34.46 | 91.76 | TRUE | 573,175   | 532  | 507  | 113 | Chinese cohorts | MAG | human body | oral cavity |
| R0170300214_tooth_RA.megahit.bin.92  | CNA0071334 | 95.35 | 2.33 | 50.30 | 89.68 | TRUE | 668,805   | 634  | 593  | 30  | Chinese cohorts | MAG | human body | oral cavity |
| R0170300217_tooth_RA.megahit.bin.11  | CNA0071335 | 100   | 0    | 35.31 | 90.46 | TRUE | 628,182   | 647  | 610  | 6   | Chinese cohorts | MAG | human body | oral cavity |
| R0170300217_tooth_RA.megahit.bin.134 | CNA0071336 | 97.67 | 0    | 33.97 | 89.70 | TRUE | 719,275   | 718  | 679  | 8   | Chinese cohorts | MAG | human body | oral cavity |
| R0170300217_tooth_RA.megahit.bin.23  | CNA0071338 | 93.02 | 0    | 42.51 | 91.42 | TRUE | 742,484   | 744  | 708  | 9   | Chinese cohorts | MAG | human body | oral cavity |
| R0170300218_tooth_RA.megahit.bin.65  | CNA0071339 | 100   | 0    | 38.12 | 90.90 | TRUE | 823,186   | 858  | 815  | 5   | Chinese cohorts | MAG | human body | oral cavity |
| R0170300219_tooth_RA.megahit.bin.19  | CNA0071341 | 100   | 2.33 | 48.74 | 90.48 | TRUE | 873,615   | 909  | 867  | 12  | Chinese cohorts | MAG | human body | oral cavity |
| R0170300219_tooth_RA.megahit.bin.1   | CNA0071342 | 95.35 | 0    | 34.08 | 89.58 | TRUE | 717,982   | 724  | 684  | 9   | Chinese cohorts | MAG | human body | oral cavity |
| R0170300219_tooth_RA.megahit.bin.2   | CNA0071344 | 100   | 0    | 38.16 | 90.95 | TRUE | 813,853   | 849  | 806  | 12  | Chinese cohorts | MAG | human body | oral cavity |
| R0170300219_tooth_RA.megahit.bin.79  | CNA0071345 | 100   | 2.33 | 47.70 | 91.71 | TRUE | 857,520   | 883  | 840  | 10  | Chinese cohorts | MAG | human body | oral cavity |
| R0170300219_tooth_RA.megahit.bin.90  | CNA0071347 | 90.7  | 0    | 50.59 | 88.94 | TRUE | 647,747   | 614  | 570  | 33  | Chinese cohorts | MAG | human body | oral cavity |
| R0170300221_tooth_RA.megahit.bin.10  | CNA0071348 | 100   | 0    | 37.79 | 90.73 | TRUE | 757,726   | 773  | 733  | 6   | Chinese cohorts | MAG | human body | oral cavity |
| R0170300221_tooth_RA.megahit.bin.19  | CNA0071350 | 95.35 | 2.33 | 49.17 | 91.01 | TRUE | 777,002   | 819  | 778  | 31  | Chinese cohorts | MAG | human body | oral cavity |
| R0170300221_tooth_RA.megahit.bin.80  | CNA0071351 | 100   | 4.65 | 46.46 | 90.59 | TRUE | 834,267   | 883  | 840  | 8   | Chinese cohorts | MAG | human body | oral cavity |
| R0170300222_tooth_RA.megahit.bin.120 | CNA0071352 | 95.35 | 0    | 37.39 | 91.66 | TRUE | 618,011   | 627  | 592  | 7   | Chinese cohorts | MAG | human body | oral cavity |
| R0170300222_tooth_RA.megahit.bin.139 | CNA0071354 | 100   | 4.65 | 46.60 | 90.99 | TRUE | 795,957   | 869  | 831  | 16  | Chinese cohorts | MAG | human body | oral cavity |
| R0170300222_tooth_RA.megahit.bin.35  | CNA0071355 | 93.02 | 2.33 | 49.14 | 90.44 | TRUE | 805,731   | 839  | 799  | 15  | Chinese cohorts | MAG | human body | oral cavity |
| R0170300222_tooth_RA.megahit.bin.89  | CNA0071357 | 97.67 | 0    | 50.36 | 89.55 | TRUE | 832,547   | 780  | 733  | 23  | Chinese cohorts | MAG | human body | oral cavity |
| R0170300222_tooth_RA.megahit.bin.94  | CNA0071358 | 100   | 0    | 52.27 | 86.12 | TRUE | 1,031,634 | 1055 | 1010 | 4   | Chinese cohorts | MAG | human body | oral cavity |
| R0170300223_tooth_RA.megahit.bin.10  | CNA0071359 | 97.67 | 0    | 41.16 | 89.65 | TRUE | 803,925   | 785  | 741  | 16  | Chinese cohorts | MAG | human body | oral cavity |
| R0170300223_tooth_RA.megahit.bin.112 | CNA0071361 | 95.35 | 0    | 37.00 | 91.75 | TRUE | 608,071   | 608  | 570  | 48  | Chinese cohorts | MAG | human body | oral cavity |
| R0170300223_tooth_RA.megahit.bin.25  | CNA0071362 | 93.02 | 0    | 38.26 | 90.11 | TRUE | 718,799   | 712  | 666  | 32  | Chinese cohorts | MAG | human body | oral cavity |
| R0170300223_tooth_RA.megahit.bin.44  | CNA0071364 | 97.67 | 0    | 34.09 | 89.89 | TRUE | 739,945   | 737  | 696  | 14  | Chinese cohorts | MAG | human body | oral cavity |
| R0170300223_tooth_RA.megahit.bin.80  | CNA0071365 | 93.02 | 0    | 36.56 | 89.64 | TRUE | 719,521   | 706  | 669  | 63  | Chinese cohorts | MAG | human body | oral cavity |
| R0170300224_tooth_RA.megahit.bin.6   | CNA0071367 | 90.7  | 4.65 | 38.13 | 91.00 | TRUE | 587,214   | 626  | 592  | 9   | Chinese cohorts | MAG | human body | oral cavity |
| R0170300224_tooth_RA.megahit.bin.94  | CNA0071368 | 95.35 | 0    | 38.28 | 89.97 | TRUE | 707,761   | 697  | 652  | 11  | Chinese cohorts | MAG | human body | oral cavity |
| R0170300226_tooth_RA.megahit.bin.18  | CNA0071370 | 100   | 4.65 | 38.16 | 90.47 | TRUE | 837,855   | 860  | 814  | 23  | Chinese cohorts | MAG | human body | oral cavity |
| R0170300228_tooth_RA.megahit.bin.112 | CNA0071371 | 100   | 4.65 | 38.42 | 90.77 | TRUE | 849,246   | 893  | 843  | 8   | Chinese cohorts | MAG | human body | oral cavity |
| R0170300228_tooth_RA.megahit.bin.36  | CNA0071373 | 90.7  | 0    | 50.87 | 89.43 | TRUE | 589,511   | 550  | 515  | 42  | Chinese cohorts | MAG | human body | oral cavity |
| R0170300229_tooth_RA.megahit.bin.108 | CNA0071374 | 100   | 0    | 39.69 | 89.51 | TRUE | 792,119   | 791  | 741  | 7   | Chinese cohorts | MAG | human body | oral cavity |
| R0170300229_tooth_RA.megahit.bin.46  | CNA0071376 | 100   | 0    | 38.00 | 90.89 | TRUE | 783,365   | 788  | 745  | 18  | Chinese cohorts | MAG | human body | oral cavity |
| R0170300229_tooth_RA.megahit.bin.48  | CNA0071377 | 100   | 4.65 | 46.66 | 90.74 | TRUE | 795,894   | 845  | 801  | 19  | Chinese cohorts | MAG | human body | oral cavity |
| R0170300230_tooth_RA.megahit.bin.36  | CNA0071379 | 97.67 | 0    | 39.85 | 89.54 | TRUE | 738,798   | 724  | 676  | 18  | Chinese cohorts | MAG | human body | oral cavity |
| R0170300231_tooth_RA.megahit.bin.10  | CNA0071380 | 100   | 0    | 38.32 | 90.50 | TRUE | 861,547   | 888  | 844  | 22  | Chinese cohorts | MAG | human body | oral cavity |
| R0170300231_tooth_RA.megahit.bin.16  | CNA0071382 | 97.67 | 0    | 50.46 | 91.96 | TRUE | 774,240   | 841  | 803  | 18  | Chinese cohorts | MAG | human body | oral cavity |
| R0170300232_tooth_RA.megahit.bin.10  | CNA0071384 | 95.35 | 0    | 50.19 | 89.91 | TRUE | 773,709   | 725  | 678  | 22  | Chinese cohorts | MAG | human body | oral cavity |
| R0170300232_tooth_RA.megahit.bin.71  | CNA0071385 | 95.35 | 0    | 35.44 | 90.04 | TRUE | 578,926   | 609  | 575  | 8   | Chinese cohorts | MAG | human body | oral cavity |
| R0170300233_tooth_RA.megahit.bin.80  | CNA0071387 | 97.67 | 0    | 36.69 | 88.93 | TRUE | 753,803   | 751  | 702  | 27  | Chinese cohorts | MAG | human body | oral cavity |
| R0170300235_tooth_RA.megahit.bin.27  | CNA0071388 | 100   | 0    | 39.74 | 89.48 | TRUE | 746,566   | 735  | 688  | 10  | Chinese cohorts | MAG | human body | oral cavity |
| R0170300235_tooth_RA.megahit.bin.34  | CNA0071390 | 95.35 | 2.33 | 38.37 | 91.22 | TRUE | 838,544   | 859  | 816  | 33  | Chinese cohorts | MAG | human body | oral cavity |
| R0170300235_tooth_RA.megahit.bin.85  | CNA0071391 | 97.67 | 0    | 34.06 | 89.49 | TRUE | 724,242   | 717  | 676  | 17  | Chinese cohorts | MAG | human body | oral cavity |
| R0170300236_tooth_RA.megahit.bin.77  | CNA0071393 | 93.02 | 0    | 34.63 | 91.34 | TRUE | 578,976   | 544  | 518  | 114 | Chinese cohorts | MAG | human body | oral cavity |
| R0170300239_tooth_RA.megahit.bin.64  | CNA0071394 | 97.67 | 0    | 34.28 | 89.69 | TRUE | 663,045   | 645  | 607  | 63  | Chinese cohorts | MAG | human body | oral cavity |
| R0170300239_tooth_RA.megahit.bin.85  | CNA0071396 | 100   | 0    | 39.77 | 89.69 | TRUE | 803,818   | 800  | 753  | 17  | Chinese cohorts | MAG | human body | oral cavity |
| R0170300240_tooth_RA.megahit.bin.61  | CNA0071397 | 95.35 | 0    | 38.00 | 91.76 | TRUE | 711,059   | 714  | 681  | 20  | Chinese cohorts | MAG | human body | oral cavity |
| R0170300241_tooth_RA.megahit.bin.28  | CNA0071399 | 100   | 0    | 52.38 | 85.94 | TRUE | 848,134   | 890  | 854  | 80  | Chinese cohorts | MAG | human body | oral cavity |
| R0170300241_tooth_RA.megahit.bin.63  | CNA0071400 | 97.67 | 0    | 37.78 | 90.53 | TRUE | 708,287   | 719  | 680  | 10  | Chinese cohorts | MAG | human body | oral cavity |
| R0170300242_tooth_RA.megahit.bin.82  | CNA0071402 | 97.67 | 0    | 38.53 | 90.28 | TRUE | 840,101   | 852  | 803  | 32  | Chinese cohorts | MAG | human body | oral cavity |
| R0170300242_tooth_RA.megahit.bin.95  | CNA0071404 | 97.67 | 0    | 49.52 | 90.71 | TRUE | 725,337   | 761  | 722  | 18  | Chinese cohorts | MAG | human body | oral cavity |
| R0170300244_tooth_RA.megahit.bin.80  | CNA0071405 | 100   | 0    | 38.13 | 90.54 | TRUE | 771,565   | 796  | 751  | 34  | Chinese cohorts | MAG | human body | oral cavity |
| R0170300246_tooth_RA.megahit.bin.19  | CNA0071407 | 100   | 4.65 | 46.66 | 90.62 | TRUE | 822,339   | 869  | 827  | 22  | Chinese cohorts | MAG | human body | oral cavity |
| R0170300247_tooth_RA.megahit.bin.77  | CNA0071408 | 95.35 | 2.33 | 38.35 | 90.86 | TRUE | 781,071   | 801  | 763  | 12  | Chinese cohorts | MAG | human body | oral cavity |
| R0170300248_tooth_RA.megahit.bin.109 | CNA0071410 | 97.67 | 0    | 42.77 | 90.84 | TRUE | 697,036   | 703  | 668  | 36  | Chinese cohorts | MAG | human body | oral cavity |
| R0170300249_tooth_RA.megahit.bin.103 | CNA0071411 | 100   | 0    | 41.47 | 89.10 | TRUE | 803,586   | 765  | 721  | 18  | Chinese cohorts | MAG | human body | oral cavity |
| R0170300249_tooth_RA.megahit.bin.28  | CNA0071413 | 97.67 | 0    | 42.62 | 90.71 | TRUE | 687,687   | 679  | 643  | 39  | Chinese cohorts | MAG | human body | oral cavity |
| R0170300249_tooth_RA.megahit.bin.3   | CNA0071414 | 90.7  | 0    | 37.16 | 91.14 | TRUE | 651,717   | 665  | 621  | 52  | Chinese cohorts | MAG | human body | oral cavity |
| R0170300250_tooth_RA.megahit.bin.53  | CNA0071416 | 90.7  | 2.33 | 38.19 | 91.95 | TRUE | 631,272   | 631  | 603  | 114 | Chinese cohorts | MAG | human body | oral cavity |
| R0170300251_tooth_RA.megahit.bin.14  | CNA0071417 | 100   | 2.33 | 48.98 | 90.45 | TRUE | 886,581   | 926  | 882  | 11  | Chinese cohorts | MAG | human body | oral cavity |
| R0170300251_tooth_RA.megahit.bin.31  | CNA0071418 | 97.67 | 0    | 37.49 | 90.96 | TRUE | 741,323   | 747  | 705  | 34  | Chinese cohorts | MAG | human body | oral cavity |
| R0170300251_tooth_RA.megahit.bin.36  | CNA0071420 | 97.67 | 0    | 50.54 | 89.70 | TRUE | 815,394   | 759  | 711  | 24  | Chinese cohorts | MAG | human body | oral cavity |
| R0170300251_tooth_RA.megahit.bin.7   | CNA0071421 | 100   | 2.33 | 46.78 | 90.84 | TRUE | 770,482   | 834  | 795  | 10  | Chinese cohorts | MAG | human body | oral cavity |
| R0170300251_tooth_RA.megahit.bin.83  | CNA0071423 | 97.67 | 0    | 34.47 | 91.08 | TRUE | 628,541   | 593  | 562  | 118 | Chinese cohorts | MAG | human body | oral cavity |
| R0170300252_tooth_RA.megahit.bin.31  | CNA0071424 | 90.7  | 0    | 37.58 | 92.19 | TRUE | 684,624   | 689  | 648  | 44  | Chinese cohorts | MAG | human body | oral cavity |
| R0170300252_tooth_RA.megahit.bin.32  | CNA0071426 | 95.35 | 0    | 50.92 | 89.71 | TRUE | 708,140   | 658  | 614  | 31  | Chinese cohorts | MAG | human body | oral cavity |
| R0170300252_tooth_RA.megahit.bin.46  | CNA0071427 | 95.35 | 0    | 33.99 | 89.72 | TRUE | 715,951   | 725  | 686  | 48  | Chinese cohorts | MAG | human body | oral cavity |

|                                       |            |       |      |       |       |      |           |      |      |     |                 |     |            |             |
|---------------------------------------|------------|-------|------|-------|-------|------|-----------|------|------|-----|-----------------|-----|------------|-------------|
| R0170300252_tooth_RAH.megahit.bin.79  | CNA0071429 | 97.67 | 0    | 38.31 | 89.37 | TRUE | 708,727   | 689  | 642  | 11  | Chinese cohorts | MAG | human body | oral cavity |
| R0170300252_tooth_RAH.megahit.bin.91  | CNA0071430 | 97.67 | 0    | 51.29 | 85.87 | TRUE | 1,056,105 | 1109 | 1065 | 22  | Chinese cohorts | MAG | human body | oral cavity |
| R0170300253_tooth_RAH.megahit.bin.118 | CNA0071432 | 100   | 0    | 37.87 | 91.00 | TRUE | 770,598   | 785  | 744  | 17  | Chinese cohorts | MAG | human body | oral cavity |
| R0170300253_tooth_RAH.megahit.bin.13  | CNA0071434 | 95.35 | 0    | 51.59 | 85.44 | TRUE | 1,039,128 | 1077 | 1036 | 48  | Chinese cohorts | MAG | human body | oral cavity |
| R0170300253_tooth_RAH.megahit.bin.35  | CNA0071435 | 90.7  | 4.65 | 49.17 | 90.25 | TRUE | 856,974   | 882  | 833  | 33  | Chinese cohorts | MAG | human body | oral cavity |
| R0170300254_tooth_RAH.megahit.bin.128 | CNA0071437 | 90.7  | 0    | 52.67 | 85.78 | TRUE | 868,936   | 900  | 858  | 41  | Chinese cohorts | MAG | human body | oral cavity |
| R0170300254_tooth_RAH.megahit.bin.23  | CNA0071438 | 90.7  | 2.33 | 48.56 | 91.42 | TRUE | 569,087   | 604  | 575  | 13  | Chinese cohorts | MAG | human body | oral cavity |
| R0170300254_tooth_RAH.megahit.bin.48  | CNA0071440 | 97.67 | 2.33 | 38.36 | 90.12 | TRUE | 704,476   | 702  | 658  | 32  | Chinese cohorts | MAG | human body | oral cavity |
| R0170300254_tooth_RAH.megahit.bin.73  | CNA0071441 | 95.35 | 0    | 34.40 | 90.50 | TRUE | 621,331   | 614  | 583  | 98  | Chinese cohorts | MAG | human body | oral cavity |
| R0170300255_tooth_RAH.megahit.bin.7   | CNA0071443 | 95.35 | 0    | 50.68 | 89.79 | TRUE | 758,834   | 715  | 671  | 60  | Chinese cohorts | MAG | human body | oral cavity |
| R0170300255_tooth_RAH.megahit.bin.83  | CNA0071444 | 97.67 | 0    | 37.47 | 90.73 | TRUE | 705,787   | 715  | 679  | 8   | Chinese cohorts | MAG | human body | oral cavity |
| R0170300256_tooth_RAH.megahit.bin.10  | CNA0071446 | 100   | 2.33 | 48.03 | 91.18 | TRUE | 764,869   | 816  | 772  | 39  | Chinese cohorts | MAG | human body | oral cavity |
| R0170300257_tooth_RAH.megahit.bin.108 | CNA0071447 | 97.67 | 0    | 51.36 | 85.29 | TRUE | 1,076,847 | 1137 | 1094 | 18  | Chinese cohorts | MAG | human body | oral cavity |
| R0170300257_tooth_RAH.megahit.bin.13  | CNA0071449 | 90.7  | 0    | 33.89 | 88.36 | TRUE | 580,054   | 595  | 564  | 4   | Chinese cohorts | MAG | human body | oral cavity |
| R0170300257_tooth_RAH.megahit.bin.54  | CNA0071450 | 93.02 | 4.65 | 37.29 | 91.90 | TRUE | 685,795   | 704  | 659  | 40  | Chinese cohorts | MAG | human body | oral cavity |
| R0170300257_tooth_RAH.megahit.bin.65  | CNA0071452 | 95.35 | 2.33 | 49.54 | 91.16 | TRUE | 745,373   | 766  | 725  | 23  | Chinese cohorts | MAG | human body | oral cavity |
| R0170300258_tooth_RAH.megahit.bin.41  | CNA0071453 | 100   | 2.33 | 52.16 | 85.70 | TRUE | 993,271   | 1047 | 1001 | 65  | Chinese cohorts | MAG | human body | oral cavity |
| R0170300258_tooth_RAH.megahit.bin.73  | CNA0071455 | 93.02 | 2.33 | 34.53 | 91.73 | TRUE | 570,846   | 533  | 506  | 124 | Chinese cohorts | MAG | human body | oral cavity |
| R0170300258_tooth_RAH.megahit.bin.9   | CNA0071456 | 90.7  | 0    | 38.36 | 89.57 | TRUE | 626,026   | 626  | 588  | 6   | Chinese cohorts | MAG | human body | oral cavity |
| R0170300259_tooth_RAH.megahit.bin.10  | CNA0071458 | 97.67 | 0    | 37.50 | 90.96 | TRUE | 700,245   | 717  | 679  | 6   | Chinese cohorts | MAG | human body | oral cavity |
| R0170300260_tooth_RAH.megahit.bin.14  | CNA0071459 | 97.67 | 0    | 34.07 | 89.47 | TRUE | 720,813   | 720  | 682  | 13  | Chinese cohorts | MAG | human body | oral cavity |
| R0170300260_tooth_RAH.megahit.bin.16  | CNA0071461 | 97.67 | 2.33 | 52.03 | 90.06 | TRUE | 884,036   | 935  | 891  | 30  | Chinese cohorts | MAG | human body | oral cavity |
| R0170300261_tooth_RAH.megahit.bin.18  | CNA0071462 | 95.35 | 0    | 52.04 | 92.02 | TRUE | 693,336   | 746  | 709  | 14  | Chinese cohorts | MAG | human body | oral cavity |
| R0170300262_tooth_RAH.megahit.bin.134 | CNA0071464 | 97.67 | 0    | 37.40 | 91.04 | TRUE | 651,154   | 656  | 618  | 18  | Chinese cohorts | MAG | human body | oral cavity |
| R0170300263_tooth_RAH.megahit.bin.26  | CNA0071465 | 97.67 | 0    | 50.71 | 89.13 | TRUE | 736,135   | 694  | 650  | 31  | Chinese cohorts | MAG | human body | oral cavity |
| R0170300264_tooth_RAH.megahit.bin.17  | CNA0071467 | 100   | 0    | 40.35 | 89.99 | TRUE | 751,815   | 730  | 683  | 7   | Chinese cohorts | MAG | human body | oral cavity |
| R0170300265_tooth_RAH.megahit.bin.100 | CNA0071468 | 95.35 | 4.65 | 49.72 | 90.39 | TRUE | 717,706   | 760  | 719  | 7   | Chinese cohorts | MAG | human body | oral cavity |
| R0170300265_tooth_RAH.megahit.bin.69  | CNA0071469 | 90.7  | 2.33 | 37.93 | 92.10 | TRUE | 679,307   | 677  | 640  | 26  | Chinese cohorts | MAG | human body | oral cavity |
| R0170300266_tooth_RAH.megahit.bin.12  | CNA0071471 | 90.7  | 0    | 38.20 | 90.75 | TRUE | 678,270   | 693  | 662  | 6   | Chinese cohorts | MAG | human body | oral cavity |
| R0170300266_tooth_RAH.megahit.bin.13  | CNA0071473 | 97.67 | 0    | 33.96 | 89.51 | TRUE | 723,719   | 718  | 678  | 19  | Chinese cohorts | MAG | human body | oral cavity |
| R0170300266_tooth_RAH.megahit.bin.24  | CNA0071474 | 93.02 | 0    | 51.01 | 90.65 | TRUE | 641,486   | 594  | 556  | 46  | Chinese cohorts | MAG | human body | oral cavity |
| R0170300266_tooth_RAH.megahit.bin.30  | CNA0071476 | 97.67 | 2.33 | 48.57 | 90.38 | TRUE | 720,716   | 749  | 708  | 27  | Chinese cohorts | MAG | human body | oral cavity |
| R0170300267_tooth_RAH.megahit.bin.18  | CNA0071477 | 90.7  | 0    | 50.80 | 89.00 | TRUE | 719,519   | 707  | 664  | 42  | Chinese cohorts | MAG | human body | oral cavity |
| R0170300267_tooth_RAH.megahit.bin.31  | CNA0071479 | 100   | 0    | 37.82 | 90.98 | TRUE | 704,098   | 728  | 690  | 10  | Chinese cohorts | MAG | human body | oral cavity |
| R0170300267_tooth_RAH.megahit.bin.37  | CNA0071480 | 100   | 4.65 | 47.73 | 91.65 | TRUE | 857,850   | 901  | 857  | 6   | Chinese cohorts | MAG | human body | oral cavity |
| R0170300267_tooth_RAH.megahit.bin.64  | CNA0071482 | 100   | 2.33 | 48.86 | 90.80 | TRUE | 871,200   | 913  | 871  | 7   | Chinese cohorts | MAG | human body | oral cavity |
| R0170300268_tooth_RAH.megahit.bin.104 | CNA0071483 | 100   | 2.33 | 38.24 | 89.99 | TRUE | 773,403   | 794  | 746  | 10  | Chinese cohorts | MAG | human body | oral cavity |
| R0170300268_tooth_RAH.megahit.bin.13  | CNA0071485 | 97.67 | 4.65 | 49.14 | 91.21 | TRUE | 814,210   | 858  | 813  | 27  | Chinese cohorts | MAG | human body | oral cavity |
| R0170300269_tooth_RAH.megahit.bin.127 | CNA0071486 | 97.67 | 0    | 38.35 | 89.35 | TRUE | 739,489   | 732  | 685  | 15  | Chinese cohorts | MAG | human body | oral cavity |
| R0170300269_tooth_RAH.megahit.bin.29  | CNA0071488 | 97.67 | 0    | 34.00 | 89.41 | TRUE | 739,818   | 730  | 689  | 17  | Chinese cohorts | MAG | human body | oral cavity |
| R0170300269_tooth_RAH.megahit.bin.4   | CNA0071489 | 97.67 | 0    | 37.83 | 90.54 | TRUE | 788,748   | 813  | 770  | 27  | Chinese cohorts | MAG | human body | oral cavity |
| R0170300269_tooth_RAH.megahit.bin.68  | CNA0071491 | 100   | 2.33 | 49.07 | 90.34 | TRUE | 835,508   | 876  | 831  | 25  | Chinese cohorts | MAG | human body | oral cavity |
| R0170300270_tooth_RAH.megahit.bin.24  | CNA0071492 | 100   | 4.65 | 37.83 | 90.90 | TRUE | 748,097   | 771  | 726  | 23  | Chinese cohorts | MAG | human body | oral cavity |
| R0170300270_tooth_RAH.megahit.bin.32  | CNA0071494 | 90.7  | 0    | 50.89 | 89.57 | TRUE | 530,120   | 531  | 490  | 46  | Chinese cohorts | MAG | human body | oral cavity |
| R0170300270_tooth_RAH.megahit.bin.51  | CNA0071496 | 95.35 | 0    | 34.06 | 90.24 | TRUE | 715,597   | 722  | 686  | 52  | Chinese cohorts | MAG | human body | oral cavity |
| R0170300271_tooth_RAH.megahit.bin.109 | CNA0071497 | 97.67 | 0    | 34.03 | 89.98 | TRUE | 697,526   | 699  | 661  | 46  | Chinese cohorts | MAG | human body | oral cavity |
| R0170300271_tooth_RAH.megahit.bin.16  | CNA0071499 | 97.67 | 0    | 40.12 | 89.53 | TRUE | 785,983   | 749  | 700  | 22  | Chinese cohorts | MAG | human body | oral cavity |
| R0170300271_tooth_RAH.megahit.bin.21  | CNA0071501 | 93.02 | 0    | 37.96 | 91.59 | TRUE | 721,995   | 739  | 703  | 25  | Chinese cohorts | MAG | human body | oral cavity |
| R0170300271_tooth_RAH.megahit.bin.84  | CNA0071503 | 97.67 | 0    | 43.47 | 91.35 | TRUE | 654,706   | 668  | 622  | 25  | Chinese cohorts | MAG | human body | oral cavity |
| R0170300271_tooth_RAH.megahit.bin.97  | CNA0071505 | 97.67 | 0    | 51.57 | 85.61 | TRUE | 1,024,191 | 1066 | 1022 | 45  | Chinese cohorts | MAG | human body | oral cavity |
| R0170300272_tooth_RAH.megahit.bin.12  | CNA0071507 | 100   | 0    | 48.34 | 89.15 | TRUE | 721,947   | 727  | 690  | 6   | Chinese cohorts | MAG | human body | oral cavity |
| R0170300272_tooth_RAH.megahit.bin.14  | CNA0071508 | 93.02 | 0    | 50.95 | 89.62 | TRUE | 687,377   | 626  | 591  | 31  | Chinese cohorts | MAG | human body | oral cavity |
| R0170300272_tooth_RAH.megahit.bin.25  | CNA0071510 | 100   | 0    | 37.67 | 90.52 | TRUE | 729,718   | 745  | 704  | 26  | Chinese cohorts | MAG | human body | oral cavity |
| R0170300272_tooth_RAH.megahit.bin.68  | CNA0071512 | 97.67 | 0    | 39.64 | 89.98 | TRUE | 663,378   | 646  | 604  | 49  | Chinese cohorts | MAG | human body | oral cavity |
| R0170300272_tooth_RAH.megahit.bin.87  | CNA0071514 | 100   | 2.33 | 49.10 | 90.24 | TRUE | 853,856   | 886  | 842  | 16  | Chinese cohorts | MAG | human body | oral cavity |
| R0170300273_tooth_RAH.megahit.bin.122 | CNA0071516 | 93.02 | 2.33 | 37.76 | 90.00 | TRUE | 662,213   | 691  | 651  | 11  | Chinese cohorts | MAG | human body | oral cavity |
| R0170300274_tooth_RAH.megahit.bin.17  | CNA0071517 | 100   | 0    | 37.68 | 90.54 | TRUE | 760,827   | 768  | 722  | 34  | Chinese cohorts | MAG | human body | oral cavity |
| R0170300274_tooth_RAH.megahit.bin.32  | CNA0071519 | 97.67 | 2.33 | 51.64 | 90.20 | TRUE | 882,149   | 935  | 894  | 41  | Chinese cohorts | MAG | human body | oral cavity |
| R0170300274_tooth_RAH.megahit.bin.88  | CNA0071521 | 100   | 0    | 39.92 | 89.70 | TRUE | 735,556   | 739  | 682  | 30  | Chinese cohorts | MAG | human body | oral cavity |
| R0170300276_tooth_RAH.megahit.bin.19  | CNA0069637 | 95.35 | 2.33 | 34.17 | 90.35 | TRUE | 614,667   | 608  | 578  | 104 | Chinese cohorts | MAG | human body | oral cavity |
| R0170300276_tooth_RAH.megahit.bin.88  | CNA0069638 | 97.67 | 0    | 50.60 | 88.62 | TRUE | 780,999   | 740  | 692  | 33  | Chinese cohorts | MAG | human body | oral cavity |
| R0170300277_tooth_RAH.megahit.bin.101 | CNA0069639 | 97.67 | 0    | 37.22 | 91.65 | TRUE | 657,605   | 668  | 630  | 36  | Chinese cohorts | MAG | human body | oral cavity |
| R0170300277_tooth_RAH.megahit.bin.4   | CNA0069640 | 97.67 | 0    | 38.38 | 89.82 | TRUE | 700,860   | 683  | 636  | 13  | Chinese cohorts | MAG | human body | oral cavity |
| R0170300277_tooth_RAH.megahit.bin.80  | CNA0069641 | 93.02 | 0    | 50.96 | 90.14 | TRUE | 661,811   | 635  | 594  | 59  | Chinese cohorts | MAG | human body | oral cavity |
| R0170300278_tooth_RAH.megahit.bin.14  | CNA0069642 | 97.67 | 0    | 34.05 | 89.99 | TRUE | 718,719   | 709  | 670  | 25  | Chinese cohorts | MAG | human body | oral cavity |
| R0170300279_tooth_RAH.megahit.bin.111 | CNA0069643 | 95.35 | 2.33 | 46.63 | 91.00 | TRUE | 746,456   | 795  | 756  | 6   | Chinese cohorts | MAG | human body | oral cavity |
| R0170300279_tooth_RAH.megahit.bin.27  | CNA0069644 | 97.67 | 0    | 37.57 | 90.93 | TRUE | 683,908   | 689  | 652  | 11  | Chinese cohorts | MAG | human body | oral cavity |
| R0170300279_tooth_RAH.megahit.bin.30  | CNA0069645 | 90.7  | 0    | 50.41 | 89.89 | TRUE | 652,373   | 636  | 599  | 19  | Chinese cohorts | MAG | human body | oral cavity |
| R0170300279_tooth_RAH.megahit.bin.3   | CNA0069646 | 97.67 | 0    | 38.18 | 90.13 | TRUE | 725,956   | 721  | 676  | 8   | Chinese cohorts | MAG | human body | oral cavity |
| R0170300279_tooth_RAH.megahit.bin.93  | CNA0069647 | 97.67 | 0    | 42.52 | 90.71 | TRUE | 694,676   | 701  | 658  | 15  | Chinese cohorts | MAG | human body | oral cavity |
| R0170300280_tooth_RAH.megahit.bin.16  | CNA0069648 | 97.67 | 0    | 38.43 | 90.27 | TRUE | 706,702   | 679  | 633  | 26  | Chinese cohorts | MAG | human body | oral cavity |
| R0170300281_tooth_RAH.megahit.bin.128 | CNA0069649 | 100   | 2.33 | 38.14 | 91.31 | TRUE | 774,359   | 784  | 746  | 25  | Chinese cohorts | MAG | human body | oral cavity |
| R0170300281_tooth_RAH.megahit.bin.27  | CNA0069650 | 97.67 | 0    | 41.62 | 89.42 | TRUE | 772,356   | 736  | 690  | 20  | Chinese cohorts | MAG | human body | oral cavity |
| R0170300282_tooth_RAH.megahit.bin.15  | CNA0069651 | 97.67 | 0    | 50.56 | 89.84 | TRUE | 806,676   | 757  | 709  | 28  | Chinese cohorts | MAG | human body | oral cavity |
| R0170300282_tooth_RAH.megahit.bin.3   | CNA0069652 | 100   | 0    | 52.01 | 85.87 | TRUE | 1,017,905 | 1048 | 1004 | 5   | Chinese cohorts | MAG | human body | oral cavity |
| R0170300283_tooth_RAH.megahit.bin.67  | CNA0069653 | 93.02 | 4.65 | 49.41 | 90.74 | TRUE | 751,051   | 784  | 745  | 13  | Chinese cohorts | MAG | human body | oral cavity |
| R0170300283_tooth_RAH.megahit.bin.89  | CNA0069654 | 97.67 | 0    | 37.73 | 91.28 | TRUE | 669,416   | 678  | 642  | 11  | Chinese cohorts | MAG | human body | oral cavity |
| R0170300284_tooth_RAH.megahit.bin.10  | CNA0069655 | 100   | 0    | 37.98 | 90.89 | TRUE | 797,833   | 821  | 778  | 14  | Chinese cohorts | MAG | human body | oral cavity |
| R0170300284_tooth_RAH.megahit.bin.22  | CNA0069656 | 93.02 | 4.65 | 49.37 | 90.31 | TRUE | 712,728   | 734  | 695  | 36  | Chinese cohorts | MAG | human body | oral cavity |
| R0170300285_tooth_RAH.megahit.bin.21  | CNA0069657 | 95.35 | 0    | 50.92 | 89.41 | TRUE | 745,431   | 700  | 654  | 22  | Chinese cohorts | MAG | human body | oral cavity |
| R0170300285_tooth_RAH.megahit.bin.44  | CNA0069658 | 97.67 | 2.33 | 47.45 | 87.62 | TRUE | 838,297   | 869  | 830  | 43  | Chinese cohorts | MAG | human body | oral cavity |



|                                       |            |       |      |       |       |      |           |      |      |     |                 |     |            |             |
|---------------------------------------|------------|-------|------|-------|-------|------|-----------|------|------|-----|-----------------|-----|------------|-------------|
| R0170300285_tooth_RAH.megahit.bin.48  | CNA0069659 | 97.67 | 0    | 38.35 | 89.51 | TRUE | 732,439   | 736  | 689  | 30  | Chinese cohorts | MAG | human body | oral cavity |
| R0170300285_tooth_RAH.megahit.bin.82  | CNA0069660 | 100   | 0    | 51.57 | 85.63 | TRUE | 1,063,626 | 1096 | 1054 | 13  | Chinese cohorts | MAG | human body | oral cavity |
| R0170300285_tooth_RAH.megahit.bin.89  | CNA0069661 | 100   | 0    | 38.35 | 90.81 | TRUE | 829,160   | 852  | 810  | 10  | Chinese cohorts | MAG | human body | oral cavity |
| R0170300287_tooth_RAH.megahit.bin.130 | CNA0069662 | 97.67 | 2.33 | 46.88 | 91.39 | TRUE | 779,841   | 822  | 785  | 28  | Chinese cohorts | MAG | human body | oral cavity |
| R0170300287_tooth_RAH.megahit.bin.150 | CNA0069663 | 100   | 0    | 39.57 | 90.67 | TRUE | 730,924   | 733  | 688  | 20  | Chinese cohorts | MAG | human body | oral cavity |
| R0170300287_tooth_RAH.megahit.bin.151 | CNA0069664 | 95.35 | 0    | 50.96 | 89.78 | TRUE | 698,440   | 646  | 606  | 22  | Chinese cohorts | MAG | human body | oral cavity |
| R0170300287_tooth_RAH.megahit.bin.57  | CNA0069665 | 97.67 | 0    | 34.03 | 89.93 | TRUE | 705,538   | 707  | 666  | 34  | Chinese cohorts | MAG | human body | oral cavity |
| R0170300288_tooth_RAH.megahit.bin.22  | CNA0069666 | 90.7  | 2.33 | 38.40 | 89.80 | TRUE | 719,123   | 699  | 652  | 31  | Chinese cohorts | MAG | human body | oral cavity |
| R0170300288_tooth_RAH.megahit.bin.34  | CNA0069667 | 95.35 | 0    | 38.24 | 90.61 | TRUE | 779,707   | 803  | 761  | 18  | Chinese cohorts | MAG | human body | oral cavity |
| R0170300288_tooth_RAH.megahit.bin.40  | CNA0069668 | 95.35 | 2.33 | 50.81 | 89.37 | TRUE | 687,383   | 643  | 603  | 41  | Chinese cohorts | MAG | human body | oral cavity |
| R0170300289_tooth_RAH.megahit.bin.36  | CNA0069669 | 95.35 | 2.33 | 37.77 | 91.46 | TRUE | 665,377   | 676  | 638  | 18  | Chinese cohorts | MAG | human body | oral cavity |
| R0170300289_tooth_RAH.megahit.bin.75  | CNA0069670 | 100   | 4.65 | 47.01 | 91.30 | TRUE | 910,691   | 959  | 920  | 104 | Chinese cohorts | MAG | human body | oral cavity |
| R0170300290_tooth_RAH.megahit.bin.111 | CNA0069671 | 97.67 | 0    | 33.90 | 90.49 | TRUE | 686,766   | 706  | 666  | 67  | Chinese cohorts | MAG | human body | oral cavity |
| R0170300290_tooth_RAH.megahit.bin.12  | CNA0069672 | 90.7  | 0    | 51.51 | 90.41 | TRUE | 508,663   | 468  | 434  | 40  | Chinese cohorts | MAG | human body | oral cavity |
| R0170300291_tooth_RAH.megahit.bin.75  | CNA0069673 | 100   | 0    | 37.93 | 90.95 | TRUE | 765,758   | 792  | 751  | 16  | Chinese cohorts | MAG | human body | oral cavity |
| R0170300291_tooth_RAH.megahit.bin.82  | CNA0069674 | 97.67 | 0    | 34.06 | 89.94 | TRUE | 727,144   | 723  | 683  | 22  | Chinese cohorts | MAG | human body | oral cavity |
| R0170300292_tooth_RAH.megahit.bin.19  | CNA0069675 | 100   | 0    | 42.16 | 92.57 | TRUE | 624,063   | 644  | 601  | 13  | Chinese cohorts | MAG | human body | oral cavity |
| R0170300292_tooth_RAH.megahit.bin.27  | CNA0069676 | 97.67 | 0    | 33.97 | 90.37 | TRUE | 678,162   | 679  | 639  | 61  | Chinese cohorts | MAG | human body | oral cavity |
| R0170300293_tooth_RAH.megahit.bin.118 | CNA0069677 | 95.35 | 2.33 | 38.91 | 91.58 | TRUE | 838,765   | 873  | 826  | 24  | Chinese cohorts | MAG | human body | oral cavity |
| R0170300293_tooth_RAH.megahit.bin.36  | CNA0069678 | 93.02 | 2.33 | 52.51 | 90.30 | TRUE | 674,846   | 726  | 691  | 19  | Chinese cohorts | MAG | human body | oral cavity |
| R0170300294_tooth_RAH.megahit.bin.112 | CNA0069679 | 90.7  | 0    | 38.58 | 90.21 | TRUE | 567,995   | 549  | 514  | 11  | Chinese cohorts | MAG | human body | oral cavity |
| R0170300294_tooth_RAH.megahit.bin.12  | CNA0069680 | 97.67 | 0    | 40.05 | 90.05 | TRUE | 772,981   | 761  | 716  | 27  | Chinese cohorts | MAG | human body | oral cavity |
| R0170300294_tooth_RAH.megahit.bin.42  | CNA0069681 | 97.67 | 0    | 34.10 | 90.23 | TRUE | 685,467   | 680  | 642  | 31  | Chinese cohorts | MAG | human body | oral cavity |
| R0170300294_tooth_RAH.megahit.bin.65  | CNA0069682 | 97.67 | 0    | 37.15 | 91.56 | TRUE | 680,600   | 681  | 640  | 50  | Chinese cohorts | MAG | human body | oral cavity |
| R0170300295_tooth_RAH.megahit.bin.55  | CNA0069683 | 100   | 0    | 51.09 | 85.58 | TRUE | 1,080,040 | 1137 | 1094 | 10  | Chinese cohorts | MAG | human body | oral cavity |
| R0170300296_tooth_RAH.megahit.bin.125 | CNA0069684 | 90.7  | 0    | 37.67 | 92.06 | TRUE | 701,928   | 718  | 683  | 45  | Chinese cohorts | MAG | human body | oral cavity |
| R0170300296_tooth_RAH.megahit.bin.95  | CNA0069685 | 100   | 0    | 35.44 | 90.35 | TRUE | 660,003   | 695  | 659  | 15  | Chinese cohorts | MAG | human body | oral cavity |
| R0170300297_tooth_RAH.megahit.bin.78  | CNA0069686 | 97.67 | 2.33 | 37.87 | 91.09 | TRUE | 750,892   | 770  | 736  | 16  | Chinese cohorts | MAG | human body | oral cavity |
| R0170300298_tooth_RAH.megahit.bin.124 | CNA0069687 | 100   | 2.33 | 40.13 | 90.02 | TRUE | 842,163   | 824  | 778  | 25  | Chinese cohorts | MAG | human body | oral cavity |
| R0170300298_tooth_RAH.megahit.bin.126 | CNA0069688 | 97.67 | 2.33 | 48.41 | 89.02 | TRUE | 695,989   | 704  | 669  | 27  | Chinese cohorts | MAG | human body | oral cavity |
| R0170300298_tooth_RAH.megahit.bin.133 | CNA0069689 | 100   | 2.33 | 52.05 | 90.29 | TRUE | 818,582   | 875  | 833  | 24  | Chinese cohorts | MAG | human body | oral cavity |
| R0170300298_tooth_RAH.megahit.bin.8   | CNA0069690 | 97.67 | 0    | 37.68 | 91.43 | TRUE | 701,596   | 721  | 678  | 33  | Chinese cohorts | MAG | human body | oral cavity |
| R0170300299_tooth_RAH.megahit.bin.100 | CNA0069691 | 100   | 0    | 51.16 | 85.42 | TRUE | 1,105,940 | 1144 | 1098 | 11  | Chinese cohorts | MAG | human body | oral cavity |
| R0170300299_tooth_RAH.megahit.bin.97  | CNA0069692 | 100   | 2.33 | 37.88 | 90.45 | TRUE | 771,641   | 794  | 758  | 8   | Chinese cohorts | MAG | human body | oral cavity |
| R0170300300_tooth_RAH.megahit.bin.146 | CNA0069693 | 100   | 2.33 | 37.78 | 91.06 | TRUE | 744,534   | 758  | 722  | 20  | Chinese cohorts | MAG | human body | oral cavity |
| R0170300300_tooth_RAH.megahit.bin.1   | CNA0069694 | 95.35 | 0    | 34.35 | 89.93 | TRUE | 706,845   | 699  | 660  | 62  | Chinese cohorts | MAG | human body | oral cavity |
| R0170300301_tooth_RAH.megahit.bin.77  | CNA0069695 | 100   | 0    | 37.83 | 90.99 | TRUE | 710,638   | 748  | 709  | 11  | Chinese cohorts | MAG | human body | oral cavity |
| R0170300301_tooth_RAH.megahit.bin.99  | CNA0069696 | 95.35 | 2.33 | 49.22 | 90.70 | TRUE | 820,761   | 873  | 828  | 9   | Chinese cohorts | MAG | human body | oral cavity |
| R0170300302_tooth_RAH.megahit.bin.114 | CNA0069697 | 97.67 | 0    | 36.96 | 89.94 | TRUE | 856,138   | 854  | 800  | 39  | Chinese cohorts | MAG | human body | oral cavity |
| R0170300302_tooth_RAH.megahit.bin.125 | CNA0069698 | 100   | 4.65 | 46.70 | 90.63 | TRUE | 838,908   | 895  | 854  | 18  | Chinese cohorts | MAG | human body | oral cavity |
| R0170300302_tooth_RAH.megahit.bin.56  | CNA0069699 | 95.35 | 0    | 51.03 | 88.52 | TRUE | 668,028   | 617  | 574  | 27  | Chinese cohorts | MAG | human body | oral cavity |
| R0170300302_tooth_RAH.megahit.bin.78  | CNA0069700 | 95.35 | 0    | 51.68 | 85.97 | TRUE | 1,039,670 | 1074 | 1032 | 35  | Chinese cohorts | MAG | human body | oral cavity |
| R0170300303_tooth_RAH.megahit.bin.143 | CNA0069701 | 95.35 | 0    | 50.79 | 89.25 | TRUE | 701,278   | 655  | 613  | 28  | Chinese cohorts | MAG | human body | oral cavity |
| R0170300303_tooth_RAH.megahit.bin.144 | CNA0069702 | 97.67 | 0    | 37.76 | 90.96 | TRUE | 734,694   | 752  | 711  | 22  | Chinese cohorts | MAG | human body | oral cavity |
| R0170300303_tooth_RAH.megahit.bin.161 | CNA0069703 | 95.35 | 0    | 34.27 | 90.07 | TRUE | 688,662   | 679  | 643  | 81  | Chinese cohorts | MAG | human body | oral cavity |
| R0170300303_tooth_RAH.megahit.bin.44  | CNA0069704 | 95.35 | 0    | 42.49 | 90.89 | TRUE | 666,965   | 670  | 633  | 24  | Chinese cohorts | MAG | human body | oral cavity |
| R0170300303_tooth_RAH.megahit.bin.49  | CNA0069705 | 97.67 | 0    | 38.17 | 89.38 | TRUE | 735,566   | 723  | 673  | 8   | Chinese cohorts | MAG | human body | oral cavity |
| R0170300304_tooth_RAH.megahit.bin.45  | CNA0069706 | 100   | 0    | 47.38 | 91.13 | TRUE | 871,079   | 938  | 893  | 16  | Chinese cohorts | MAG | human body | oral cavity |
| R0170300305_tooth_RAH.megahit.bin.21  | CNA0069707 | 93.02 | 0    | 37.30 | 91.76 | TRUE | 638,149   | 645  | 605  | 61  | Chinese cohorts | MAG | human body | oral cavity |
| R0170300305_tooth_RAH.megahit.bin.5   | CNA0069708 | 100   | 0    | 35.28 | 90.65 | TRUE | 658,932   | 687  | 651  | 7   | Chinese cohorts | MAG | human body | oral cavity |
| R0170300306_tooth_RAH.megahit.bin.102 | CNA0069709 | 95.35 | 0    | 42.57 | 91.74 | TRUE | 681,415   | 687  | 649  | 13  | Chinese cohorts | MAG | human body | oral cavity |
| R0170300306_tooth_RAH.megahit.bin.130 | CNA0069710 | 90.7  | 0    | 37.18 | 91.64 | TRUE | 608,437   | 620  | 586  | 24  | Chinese cohorts | MAG | human body | oral cavity |
| R0170300306_tooth_RAH.megahit.bin.30  | CNA0069711 | 97.67 | 4.65 | 51.88 | 90.71 | TRUE | 839,927   | 904  | 859  | 23  | Chinese cohorts | MAG | human body | oral cavity |
| R0170300306_tooth_RAH.megahit.bin.34  | CNA0069712 | 97.67 | 0    | 46.79 | 91.45 | TRUE | 776,987   | 806  | 772  | 50  | Chinese cohorts | MAG | human body | oral cavity |
| R0170300307_tooth_RAH.megahit.bin.81  | CNA0069713 | 100   | 2.33 | 48.81 | 90.20 | TRUE | 851,119   | 887  | 843  | 20  | Chinese cohorts | MAG | human body | oral cavity |
| R0170300308_tooth_RAH.megahit.bin.44  | CNA0069714 | 100   | 2.33 | 47.93 | 91.57 | TRUE | 808,441   | 850  | 806  | 25  | Chinese cohorts | MAG | human body | oral cavity |
| R0170300308_tooth_RAH.megahit.bin.62  | CNA0069715 | 93.02 | 2.33 | 51.11 | 90.59 | TRUE | 649,297   | 618  | 583  | 106 | Chinese cohorts | MAG | human body | oral cavity |
| R0170300309_tooth_RAH.megahit.bin.15  | CNA0069716 | 97.67 | 0    | 50.04 | 89.29 | TRUE | 807,017   | 766  | 718  | 32  | Chinese cohorts | MAG | human body | oral cavity |
| R0170300309_tooth_RAH.megahit.bin.66  | CNA0069717 | 97.67 | 0    | 37.23 | 91.12 | TRUE | 654,915   | 668  | 633  | 12  | Chinese cohorts | MAG | human body | oral cavity |
| R0170300309_tooth_RAH.megahit.bin.70  | CNA0069718 | 95.35 | 0    | 47.33 | 91.53 | TRUE | 823,181   | 881  | 841  | 44  | Chinese cohorts | MAG | human body | oral cavity |
| R0170300310_tooth_RAH.megahit.bin.34  | CNA0069719 | 93.02 | 0    | 50.87 | 89.87 | TRUE | 721,033   | 671  | 630  | 20  | Chinese cohorts | MAG | human body | oral cavity |
| R0170300311_tooth_RAH.megahit.bin.11  | CNA0069720 | 95.35 | 2.33 | 49.17 | 90.48 | TRUE | 799,235   | 838  | 795  | 7   | Chinese cohorts | MAG | human body | oral cavity |
| R0170300311_tooth_RAH.megahit.bin.87  | CNA0069721 | 90.7  | 0    | 37.25 | 91.38 | TRUE | 636,667   | 654  | 614  | 29  | Chinese cohorts | MAG | human body | oral cavity |
| R0170300311_tooth_RAH.megahit.bin.92  | CNA0069722 | 90.7  | 0    | 50.74 | 90.24 | TRUE | 674,780   | 643  | 605  | 27  | Chinese cohorts | MAG | human body | oral cavity |
| R0170300312_tooth_RAH.megahit.bin.31  | CNA0069723 | 95.35 | 0    | 35.43 | 90.93 | TRUE | 595,146   | 622  | 590  | 33  | Chinese cohorts | MAG | human body | oral cavity |
| R0170300313_tooth_RAH.megahit.bin.102 | CNA0069724 | 97.67 | 0    | 38.31 | 90.13 | TRUE | 722,769   | 718  | 672  | 24  | Chinese cohorts | MAG | human body | oral cavity |
| R0170300313_tooth_RAH.megahit.bin.7   | CNA0069725 | 95.35 | 0    | 40.36 | 89.13 | TRUE | 752,779   | 712  | 665  | 20  | Chinese cohorts | MAG | human body | oral cavity |
| R0170300318_tooth_RAH.megahit.bin.108 | CNA0069726 | 93.02 | 0    | 38.75 | 89.89 | TRUE | 567,940   | 563  | 525  | 43  | Chinese cohorts | MAG | human body | oral cavity |
| R0170300318_tooth_RAH.megahit.bin.131 | CNA0069727 | 93.02 | 2.33 | 37.68 | 91.72 | TRUE | 654,857   | 665  | 631  | 55  | Chinese cohorts | MAG | human body | oral cavity |
| R0170300319_tooth_RAH.megahit.bin.124 | CNA0069728 | 97.67 | 0    | 51.42 | 85.71 | TRUE | 1,071,081 | 1126 | 1082 | 16  | Chinese cohorts | MAG | human body | oral cavity |
| R0170300320_tooth_RAH.megahit.bin.4   | CNA0069729 | 100   | 0    | 38.06 | 90.78 | TRUE | 809,034   | 836  | 795  | 13  | Chinese cohorts | MAG | human body | oral cavity |
| R0170300320_tooth_RAH.megahit.bin.52  | CNA0069730 | 90.7  | 0    | 48.92 | 90.65 | TRUE | 707,623   | 731  | 692  | 38  | Chinese cohorts | MAG | human body | oral cavity |
| R0170300321_tooth_RAH.megahit.bin.21  | CNA0069731 | 100   | 0    | 38.14 | 90.67 | TRUE | 815,493   | 840  | 800  | 11  | Chinese cohorts | MAG | human body | oral cavity |
| R0170300321_tooth_RAH.megahit.bin.33  | CNA0069732 | 100   | 4.65 | 48.21 | 91.27 | TRUE | 775,899   | 819  | 776  | 11  | Chinese cohorts | MAG | human body | oral cavity |
| R0170300321_tooth_RAH.megahit.bin.95  | CNA0069733 | 95.35 | 0    | 50.40 | 89.56 | TRUE | 723,869   | 676  | 632  | 20  | Chinese cohorts | MAG | human body | oral cavity |
| R0170300323_tooth_RAH.megahit.bin.16  | CNA0069734 | 95.35 | 4.65 | 34.24 | 89.86 | TRUE | 656,830   | 641  | 607  | 31  | Chinese cohorts | MAG | human body | oral cavity |
| R0170300323_tooth_RAH.megahit.bin.22  | CNA0069735 | 97.67 | 4.65 | 41.54 | 89.62 | TRUE | 772,728   | 749  | 705  | 30  | Chinese cohorts | MAG | human body | oral cavity |
| R0170300323_tooth_RAH.megahit.bin.52  | CNA0069736 | 97.67 | 4.65 | 46.86 | 91.92 | TRUE | 714,173   | 739  | 709  | 61  | Chinese cohorts | MAG | human body | oral cavity |
| R0170300323_tooth_RAH.megahit.bin.84  | CNA0069737 | 100   | 2.33 | 38.20 | 90.61 | TRUE | 853,878   | 900  | 844  | 38  | Chinese cohorts | MAG | human body | oral cavity |
| R0170300325_tooth_RA.megahit.bin.68   | CNA0069738 | 100   | 0    | 52.03 | 86.00 | TRUE | 1,015,459 | 1042 | 995  | 5   | Chinese cohorts | MAG | human body | oral cavity |
| R0170300325_tooth_RA.megahit.bin.8    | CNA0069739 | 93.02 | 0    | 50.74 | 89.14 | TRUE | 732,973   | 680  | 634  | 30  | Chinese cohorts | MAG | human body | oral cavity |

|                                          |            |       |      |       |       |      |         |     |     |     |                 |     |            |             |
|------------------------------------------|------------|-------|------|-------|-------|------|---------|-----|-----|-----|-----------------|-----|------------|-------------|
| R0170300326_tooth_RA.megahit.bin.12      | CNA0069740 | 93.02 | 0    | 50.78 | 89.01 | TRUE | 771,424 | 723 | 678 | 49  | Chinese cohorts | MAG | human body | oral cavity |
| R0170300327_tooth_RA.megahit.bin.5       | CNA0069741 | 97.67 | 0    | 38.20 | 89.28 | TRUE | 731,242 | 720 | 672 | 6   | Chinese cohorts | MAG | human body | oral cavity |
| R0170300327_tooth_RA.megahit.bin.68      | CNA0069742 | 93.02 | 0    | 38.15 | 91.42 | TRUE | 716,454 | 736 | 701 | 6   | Chinese cohorts | MAG | human body | oral cavity |
| R0170300334_saliva_RA.megahit.bin.69     | CNA0069743 | 100   | 0    | 43.16 | 91.01 | TRUE | 697,957 | 747 | 705 | 17  | Chinese cohorts | MAG | human body | oral cavity |
| R0170300336_saliva_RA.megahit.bin.72     | CNA0069744 | 97.67 | 0    | 36.29 | 90.98 | TRUE | 673,870 | 719 | 679 | 14  | Chinese cohorts | MAG | human body | oral cavity |
| R0170300338_saliva_RA.megahit.bin.56     | CNA0069745 | 93.02 | 0    | 37.05 | 91.91 | TRUE | 589,972 | 591 | 559 | 47  | Chinese cohorts | MAG | human body | oral cavity |
| R0170300350_saliva_RA.megahit.bin.87     | CNA0069746 | 97.67 | 0    | 35.38 | 90.49 | TRUE | 638,850 | 677 | 640 | 19  | Chinese cohorts | MAG | human body | oral cavity |
| R0170300355_saliva_RA.megahit.bin.8      | CNA0069747 | 95.35 | 0    | 50.82 | 88.89 | TRUE | 728,090 | 686 | 640 | 53  | Chinese cohorts | MAG | human body | oral cavity |
| R0170300356_saliva_RA.megahit.bin.101    | CNA0069748 | 93.02 | 2.33 | 36.28 | 91.35 | TRUE | 535,754 | 552 | 516 | 121 | Chinese cohorts | MAG | human body | oral cavity |
| R0170300378_saliva_RAH.megahit.bin.36    | CNA0069749 | 97.67 | 0    | 40.78 | 89.30 | TRUE | 777,777 | 761 | 716 | 10  | Chinese cohorts | MAG | human body | oral cavity |
| R0170300378_saliva_RAH.megahit.bin.43    | CNA0069750 | 100   | 2.33 | 36.26 | 91.32 | TRUE | 651,837 | 673 | 637 | 22  | Chinese cohorts | MAG | human body | oral cavity |
| R0170300381_saliva_RAH.megahit.bin.27    | CNA0069751 | 90.7  | 2.33 | 43.64 | 92.04 | TRUE | 648,093 | 698 | 661 | 118 | Chinese cohorts | MAG | human body | oral cavity |
| R0170300390_saliva_RAH.megahit.bin.85    | CNA0069752 | 93.02 | 0    | 43.39 | 92.21 | TRUE | 648,392 | 711 | 677 | 6   | Chinese cohorts | MAG | human body | oral cavity |
| R0170300392_saliva_RAH.megahit.bin.14    | CNA0069753 | 97.67 | 4.65 | 41.27 | 89.59 | TRUE | 693,576 | 674 | 633 | 60  | Chinese cohorts | MAG | human body | oral cavity |
| RDPYD18097490_A_saliva.metaspades.bin.7  | CNA0069778 | 97.67 | 0    | 35.89 | 89.65 | TRUE | 697,059 | 744 | 703 | 11  | Chinese cohorts | MAG | human body | oral cavity |
| RDPYD18097506_A_saliva.metaspades.bin.46 | CNA0069779 | 100   | 0    | 35.85 | 90.07 | TRUE | 692,389 | 729 | 688 | 17  | Chinese cohorts | MAG | human body | oral cavity |
| RDPYD18097572_A_saliva.metaspades.bin.15 | CNA0069780 | 100   | 0    | 35.71 | 89.34 | TRUE | 652,575 | 683 | 642 | 5   | Chinese cohorts | MAG | human body | oral cavity |
| RDPYD18097580_A_saliva.metaspades.bin.29 | CNA0069781 | 97.67 | 0    | 35.60 | 89.97 | TRUE | 647,261 | 675 | 634 | 23  | Chinese cohorts | MAG | human body | oral cavity |
| RDPYD18097607_A_saliva.metaspades.bin.40 | CNA0069782 | 100   | 0    | 35.81 | 89.89 | TRUE | 660,390 | 683 | 641 | 13  | Chinese cohorts | MAG | human body | oral cavity |
| RDPYD18097619_A_saliva.metaspades.bin.8  | CNA0069783 | 97.67 | 0    | 43.71 | 91.67 | TRUE | 654,765 | 717 | 677 | 41  | Chinese cohorts | MAG | human body | oral cavity |
| RDPYD18097621_A_saliva.metaspades.bin.14 | CNA0069784 | 93.02 | 0    | 43.12 | 91.55 | TRUE | 703,490 | 769 | 724 | 12  | Chinese cohorts | MAG | human body | oral cavity |
| RDPYD18097648_A_saliva.metaspades.bin.17 | CNA0069785 | 100   | 0    | 43.09 | 91.34 | TRUE | 741,089 | 791 | 745 | 3   | Chinese cohorts | MAG | human body | oral cavity |
| RDPYD18097649_A_saliva.metaspades.bin.16 | CNA0069786 | 100   | 0    | 40.37 | 90.09 | TRUE | 737,822 | 718 | 672 | 10  | Chinese cohorts | MAG | human body | oral cavity |
| RDPYD18097660_A_saliva.metaspades.bin.29 | CNA0069787 | 100   | 0    | 43.23 | 91.24 | TRUE | 739,032 | 790 | 744 | 8   | Chinese cohorts | MAG | human body | oral cavity |
| RDPYD18097666_A_saliva.metaspades.bin.15 | CNA0069788 | 100   | 0    | 43.32 | 91.13 | TRUE | 738,810 | 796 | 750 | 25  | Chinese cohorts | MAG | human body | oral cavity |
| RDPYD18098299_A_saliva.metaspades.bin.46 | CNA0069789 | 100   | 0    | 35.79 | 90.41 | TRUE | 663,356 | 698 | 657 | 7   | Chinese cohorts | MAG | human body | oral cavity |
| RDPYD18098308_A_saliva.metaspades.bin.70 | CNA0069790 | 100   | 2.33 | 35.67 | 89.82 | TRUE | 692,325 | 739 | 702 | 33  | Chinese cohorts | MAG | human body | oral cavity |
| RDPYD18098326_A_saliva.metaspades.bin.7  | CNA0069791 | 100   | 0    | 32.44 | 90.31 | TRUE | 635,755 | 649 | 608 | 8   | Chinese cohorts | MAG | human body | oral cavity |
| RDPYD18098341_A_saliva.metaspades.bin.33 | CNA0069792 | 97.67 | 0    | 43.42 | 91.80 | TRUE | 669,906 | 707 | 662 | 55  | Chinese cohorts | MAG | human body | oral cavity |
| RDPYD18098375_A_saliva.metaspades.bin.22 | CNA0069793 | 95.35 | 0    | 32.75 | 89.56 | TRUE | 593,527 | 614 | 576 | 12  | Chinese cohorts | MAG | human body | oral cavity |
| RDPYD18098469_A_saliva.metaspades.bin.33 | CNA0069794 | 100   | 2.33 | 43.56 | 91.43 | TRUE | 671,432 | 739 | 696 | 20  | Chinese cohorts | MAG | human body | oral cavity |
| RDPYD18098470_A_saliva.metaspades.bin.42 | CNA0069795 | 100   | 0    | 35.87 | 89.93 | TRUE | 733,440 | 779 | 738 | 18  | Chinese cohorts | MAG | human body | oral cavity |
| RDPYD18098496_A_saliva.metaspades.bin.7  | CNA0069796 | 100   | 0    | 35.72 | 89.68 | TRUE | 689,015 | 724 | 683 | 7   | Chinese cohorts | MAG | human body | oral cavity |
| RDPYD18098560_A_saliva.metaspades.bin.42 | CNA0069797 | 100   | 0    | 35.58 | 89.78 | TRUE | 654,977 | 680 | 639 | 13  | Chinese cohorts | MAG | human body | oral cavity |
| RDPYD18098585_A_saliva.metaspades.bin.25 | CNA0069798 | 97.67 | 2.33 | 40.70 | 89.21 | TRUE | 816,146 | 788 | 744 | 60  | Chinese cohorts | MAG | human body | oral cavity |
| RDPYD18098591_A_saliva.metaspades.bin.49 | CNA0069799 | 90.7  | 2.33 | 43.29 | 90.74 | TRUE | 566,775 | 629 | 599 | 37  | Chinese cohorts | MAG | human body | oral cavity |
| RDPYD18098768_A_saliva.metaspades.bin.59 | CNA0069800 | 93.02 | 0    | 43.48 | 91.21 | TRUE | 633,266 | 697 | 652 | 66  | Chinese cohorts | MAG | human body | oral cavity |
| RDPYD18098770_A_saliva.metaspades.bin.53 | CNA0069801 | 97.67 | 0    | 43.08 | 92.86 | TRUE | 740,483 | 798 | 758 | 14  | Chinese cohorts | MAG | human body | oral cavity |
| RDPYD18098785_A_saliva.metaspades.bin.37 | CNA0069802 | 100   | 0    | 35.80 | 90.90 | TRUE | 638,222 | 656 | 622 | 25  | Chinese cohorts | MAG | human body | oral cavity |
| RDPYD18098794_A_saliva.metaspades.bin.6  | CNA0069803 | 100   | 0    | 35.25 | 89.40 | TRUE | 648,910 | 678 | 635 | 6   | Chinese cohorts | MAG | human body | oral cavity |
| RDPYD18098804_A_saliva.metaspades.bin.34 | CNA0069804 | 93.02 | 2.33 | 43.46 | 91.88 | TRUE | 651,571 | 708 | 667 | 56  | Chinese cohorts | MAG | human body | oral cavity |
| RDPYD18098839_A_saliva.metaspades.bin.19 | CNA0069805 | 97.67 | 2.33 | 43.33 | 90.64 | TRUE | 616,693 | 667 | 629 | 70  | Chinese cohorts | MAG | human body | oral cavity |
| RDPYD18098844_A_saliva.metaspades.bin.18 | CNA0069806 | 97.67 | 0    | 35.69 | 89.54 | TRUE | 654,469 | 676 | 635 | 9   | Chinese cohorts | MAG | human body | oral cavity |
| RDPYD18098853_A_saliva.metaspades.bin.65 | CNA0069807 | 95.35 | 0    | 43.56 | 90.58 | TRUE | 668,353 | 717 | 674 | 28  | Chinese cohorts | MAG | human body | oral cavity |
| RDPYD18098858_A_saliva.metaspades.bin.23 | CNA0069808 | 95.35 | 0    | 43.47 | 92.33 | TRUE | 593,822 | 636 | 601 | 50  | Chinese cohorts | MAG | human body | oral cavity |
| RDPYD18098859_A_saliva.metaspades.bin.8  | CNA0069809 | 95.35 | 0    | 43.45 | 92.56 | TRUE | 654,042 | 702 | 665 | 23  | Chinese cohorts | MAG | human body | oral cavity |
| RDPYD18098861_A_saliva.metaspades.bin.17 | CNA0069810 | 97.67 | 0    | 35.90 | 90.22 | TRUE | 582,770 | 628 | 595 | 137 | Chinese cohorts | MAG | human body | oral cavity |
| RDPYD18098875_A_saliva.metaspades.bin.44 | CNA0069811 | 100   | 0    | 43.23 | 91.89 | TRUE | 740,349 | 814 | 770 | 13  | Chinese cohorts | MAG | human body | oral cavity |
| RDPYD18098882_A_saliva.metaspades.bin.1  | CNA0069812 | 97.67 | 0    | 43.11 | 91.49 | TRUE | 720,215 | 770 | 726 | 29  | Chinese cohorts | MAG | human body | oral cavity |
| RDPYD18098888_A_saliva.metaspades.bin.8  | CNA0069814 | 97.67 | 0    | 35.79 | 90.47 | TRUE | 719,026 | 777 | 741 | 9   | Chinese cohorts | MAG | human body | oral cavity |
| RDPYD18098889_A_saliva.metaspades.bin.45 | CNA0069815 | 100   | 0    | 38.22 | 90.49 | TRUE | 831,089 | 859 | 818 | 12  | Chinese cohorts | MAG | human body | oral cavity |
| RDPYD18098889_A_saliva.metaspades.bin.64 | CNA0069816 | 97.67 | 0    | 35.44 | 89.53 | TRUE | 634,947 | 657 | 619 | 68  | Chinese cohorts | MAG | human body | oral cavity |
| RDPYD18098896_A_saliva.metaspades.bin.29 | CNA0069818 | 97.67 | 0    | 41.12 | 89.31 | TRUE | 807,601 | 794 | 748 | 5   | Chinese cohorts | MAG | human body | oral cavity |
| RDPYD18098900_A_saliva.metaspades.bin.51 | CNA0069819 | 95.35 | 0    | 43.52 | 91.93 | TRUE | 612,833 | 664 | 629 | 26  | Chinese cohorts | MAG | human body | oral cavity |
| RDPYD18098912_A_saliva.metaspades.bin.17 | CNA0069820 | 100   | 0    | 42.81 | 91.79 | TRUE | 652,380 | 698 | 654 | 5   | Chinese cohorts | MAG | human body | oral cavity |
| RDPYD18098916_A_saliva.metaspades.bin.11 | CNA0069822 | 100   | 0    | 35.88 | 89.78 | TRUE | 710,895 | 748 | 706 | 3   | Chinese cohorts | MAG | human body | oral cavity |
| RDPYD18098916_A_saliva.metaspades.bin.18 | CNA0069823 | 100   | 0    | 35.39 | 90.22 | TRUE | 635,862 | 661 | 622 | 5   | Chinese cohorts | MAG | human body | oral cavity |
| RDPYD18098935_A_saliva.metaspades.bin.23 | CNA0069824 | 100   | 0    | 35.39 | 89.75 | TRUE | 625,791 | 635 | 594 | 11  | Chinese cohorts | MAG | human body | oral cavity |
| RDPYD18098936_A_saliva.metaspades.bin.10 | CNA0069826 | 100   | 2.33 | 32.63 | 90.11 | TRUE | 584,079 | 596 | 557 | 57  | Chinese cohorts | MAG | human body | oral cavity |
| RDPYD18098959_A_saliva.metaspades.bin.38 | CNA0069827 | 97.67 | 0    | 43.32 | 91.35 | TRUE | 770,647 | 844 | 796 | 11  | Chinese cohorts | MAG | human body | oral cavity |
| RDPYD18098961_A_saliva.metaspades.bin.6  | CNA0069828 | 100   | 0    | 43.30 | 91.01 | TRUE | 735,829 | 791 | 744 | 4   | Chinese cohorts | MAG | human body | oral cavity |
| RDPYD18098964_A_saliva.metaspades.bin.45 | CNA0069830 | 97.67 | 0    | 43.53 | 90.88 | TRUE | 643,985 | 690 | 652 | 17  | Chinese cohorts | MAG | human body | oral cavity |
| RDPYD18098966_A_saliva.metaspades.bin.10 | CNA0069831 | 97.67 | 2.33 | 35.34 | 89.51 | TRUE | 621,363 | 639 | 599 | 21  | Chinese cohorts | MAG | human body | oral cavity |
| RDPYD18098980_A_saliva.metaspades.bin.28 | CNA0069832 | 100   | 2.33 | 35.85 | 89.51 | TRUE | 708,490 | 753 | 710 | 16  | Chinese cohorts | MAG | human body | oral cavity |
| RDPYD18098996_A_saliva.metaspades.bin.18 | CNA0069834 | 100   | 2.33 | 35.43 | 89.66 | TRUE | 666,525 | 696 | 655 | 36  | Chinese cohorts | MAG | human body | oral cavity |
| RDPYD18098998_A_saliva.metaspades.bin.11 | CNA0069835 | 93.02 | 0    | 36.30 | 90.63 | TRUE | 600,652 | 626 | 589 | 73  | Chinese cohorts | MAG | human body | oral cavity |
| RDPYD18099004_A_saliva.metaspades.bin.53 | CNA0069836 | 100   | 0    | 43.52 | 91.51 | TRUE | 708,338 | 764 | 718 | 10  | Chinese cohorts | MAG | human body | oral cavity |
| RDPYD18099005_A_saliva.metaspades.bin.66 | CNA0069838 | 100   | 2.33 | 43.15 | 91.95 | TRUE | 750,694 | 794 | 748 | 23  | Chinese cohorts | MAG | human body | oral cavity |
| RDPYD18099019_A_saliva.metaspades.bin.28 | CNA0069839 | 95.35 | 2.33 | 43.32 | 92.91 | TRUE | 660,755 | 722 | 686 | 3   | Chinese cohorts | MAG | human body | oral cavity |
| RDPYD18099034_A_saliva.metaspades.bin.21 | CNA0069841 | 100   | 2.33 | 43.45 | 91.26 | TRUE | 708,855 | 766 | 723 | 22  | Chinese cohorts | MAG | human body | oral cavity |
| RDPYD18099036_A_saliva.metaspades.bin.59 | CNA0069842 | 93.02 | 2.33 | 36.35 | 91.01 | TRUE | 613,612 | 652 | 621 | 119 | Chinese cohorts | MAG | human body | oral cavity |
| RDPYD18099149_A_tongue.metaspades.bin.20 | CNA0069843 | 90.7  | 2.33 | 43.60 | 91.72 | TRUE | 608,573 | 655 | 616 | 28  | Chinese cohorts | MAG | human body | oral cavity |
| RDPYD18101880_A_saliva.metaspades.bin.11 | CNA0069845 | 95.35 | 2.33 | 39.93 | 89.85 | TRUE | 731,895 | 692 | 650 | 36  | Chinese cohorts | MAG | human body | oral cavity |
| RDPYD18101881_A_saliva.metaspades.bin.12 | CNA0069846 | 97.67 | 0    | 43.43 | 91.28 | TRUE | 670,094 | 737 | 694 | 22  | Chinese cohorts | MAG | human body | oral cavity |
| RDPYD18123870_A_saliva.metaspades.bin.24 | CNA0069848 | 100   | 0    | 40.07 | 89.90 | TRUE | 853,212 | 811 | 763 | 7   | Chinese cohorts | MAG | human body | oral cavity |
| RDPYD18123880_A_tongue.metaspades.bin.23 | CNA0069849 | 100   | 0    | 40.07 | 89.95 | TRUE | 850,540 | 805 | 758 | 6   | Chinese cohorts | MAG | human body | oral cavity |
| RDPYD18123882_A_tongue.metaspades.bin.29 | CNA0069851 | 90.7  | 0    | 36.09 | 90.69 | TRUE | 513,087 | 550 | 524 | 150 | Chinese cohorts | MAG | human body | oral cavity |
| RDPYD18201598_A_saliva.metaspades.bin.37 | CNA0069903 | 100   | 0    | 43.40 | 91.38 | TRUE | 676,462 | 731 | 687 | 15  | Chinese cohorts | MAG | human body | oral cavity |
| RDPYD18201616_A_saliva.metaspades.bin.6  | CNA0069905 | 100   | 0    | 35.77 | 90.40 | TRUE | 645,975 | 668 | 628 | 3   | Chinese cohorts | MAG | human body | oral cavity |
| RDPYD18201627_A_saliva.metaspades.bin.4  | CNA0069906 | 93.02 | 2.33 | 43.67 | 92.56 | TRUE | 579,514 | 616 | 592 | 93  | Chinese cohorts | MAG | human body | oral cavity |
| RDPYD18201644_A_saliva.metaspades.bin.16 | CNA0069908 | 95.35 | 0    | 43.43 | 90.93 | TRUE | 662,170 | 719 | 678 | 11  | Chinese cohorts | MAG | human body | oral cavity |



|                                          |            |       |      |       |       |      |         |     |     |     |                 |     |            |             |
|------------------------------------------|------------|-------|------|-------|-------|------|---------|-----|-----|-----|-----------------|-----|------------|-------------|
| RDPYD18201650_A_saliva.metaspades.bin.5  | CNA0069909 | 100   | 0    | 43.57 | 91.16 | TRUE | 800,797 | 870 | 825 | 9   | Chinese cohorts | MAG | human body | oral cavity |
| RDPYD18201655_A_saliva.metaspades.bin.21 | CNA0069911 | 97.67 | 0    | 40.92 | 89.87 | TRUE | 617,802 | 592 | 561 | 46  | Chinese cohorts | MAG | human body | oral cavity |
| RDPYD18201683_A_saliva.metaspades.bin.7  | CNA0069912 | 100   | 0    | 35.74 | 90.04 | TRUE | 645,726 | 665 | 624 | 13  | Chinese cohorts | MAG | human body | oral cavity |
| RDPYD18201685_A_saliva.metaspades.bin.24 | CNA0069914 | 100   | 0    | 35.43 | 89.75 | TRUE | 619,086 | 642 | 601 | 13  | Chinese cohorts | MAG | human body | oral cavity |
| RDPYD18201694_A_saliva.metaspades.bin.10 | CNA0069915 | 100   | 0    | 43.13 | 91.52 | TRUE | 727,484 | 784 | 741 | 7   | Chinese cohorts | MAG | human body | oral cavity |
| RDPYD18201698_A_saliva.metaspades.bin.50 | CNA0069917 | 100   | 0    | 35.94 | 90.16 | TRUE | 721,716 | 749 | 708 | 7   | Chinese cohorts | MAG | human body | oral cavity |
| RDPYD18201709_A_saliva.metaspades.bin.24 | CNA0069918 | 93.02 | 0    | 43.41 | 91.74 | TRUE | 562,721 | 622 | 588 | 68  | Chinese cohorts | MAG | human body | oral cavity |
| RDPYD18201735_A_saliva.metaspades.bin.32 | CNA0069920 | 97.67 | 0    | 35.87 | 89.87 | TRUE | 653,775 | 687 | 645 | 15  | Chinese cohorts | MAG | human body | oral cavity |
| RDPYD18201775_A_saliva.metaspades.bin.17 | CNA0069921 | 93.02 | 0    | 35.65 | 89.97 | TRUE | 520,073 | 540 | 501 | 8   | Chinese cohorts | MAG | human body | oral cavity |
| RDPYD18201791_A_saliva.metaspades.bin.40 | CNA0069923 | 95.35 | 0    | 43.17 | 91.48 | TRUE | 662,052 | 715 | 674 | 26  | Chinese cohorts | MAG | human body | oral cavity |
| RDPYD18201791_A_saliva.metaspades.bin.75 | CNA0069924 | 97.67 | 0    | 35.79 | 89.29 | TRUE | 689,460 | 727 | 686 | 15  | Chinese cohorts | MAG | human body | oral cavity |
| RDPYD18201832_A_saliva.metaspades.bin.52 | CNA0069926 | 97.67 | 0    | 43.43 | 91.56 | TRUE | 713,119 | 772 | 725 | 20  | Chinese cohorts | MAG | human body | oral cavity |
| RDPYD18201891_A_saliva.metaspades.bin.24 | CNA0069927 | 97.67 | 0    | 35.83 | 90.40 | TRUE | 615,062 | 656 | 621 | 41  | Chinese cohorts | MAG | human body | oral cavity |
| RDPYD18201913_A_saliva.metaspades.bin.10 | CNA0069929 | 100   | 0    | 36.49 | 90.38 | TRUE | 687,154 | 724 | 681 | 21  | Chinese cohorts | MAG | human body | oral cavity |
| RDPYD18201938_A_saliva.metaspades.bin.16 | CNA0069930 | 100   | 0    | 35.35 | 89.70 | TRUE | 627,043 | 648 | 607 | 3   | Chinese cohorts | MAG | human body | oral cavity |
| RDPYD18201938_A_saliva.metaspades.bin.59 | CNA0069932 | 100   | 0    | 32.47 | 91.14 | TRUE | 627,731 | 655 | 619 | 8   | Chinese cohorts | MAG | human body | oral cavity |
| RDPYD18201945_A_saliva.metaspades.bin.17 | CNA0069933 | 97.67 | 0    | 35.71 | 88.92 | TRUE | 713,147 | 740 | 697 | 17  | Chinese cohorts | MAG | human body | oral cavity |
| RDPYD18201957_A_saliva.metaspades.bin.16 | CNA0069935 | 97.67 | 0    | 35.72 | 90.01 | TRUE | 674,554 | 715 | 674 | 6   | Chinese cohorts | MAG | human body | oral cavity |
| RDPYD18300227_A_saliva.metaspades.bin.33 | CNA0069981 | 97.67 | 0    | 43.54 | 91.57 | TRUE | 553,049 | 582 | 547 | 45  | Chinese cohorts | MAG | human body | oral cavity |
| RSZYD18187735_A_saliva.metaspades.bin.54 | CNA0070958 | 90.7  | 2.33 | 43.72 | 92.46 | TRUE | 533,092 | 582 | 552 | 59  | Chinese cohorts | MAG | human body | oral cavity |
| RSZYD18187739_A_saliva.metaspades.bin.22 | CNA0070961 | 93.02 | 0    | 40.13 | 89.47 | TRUE | 750,186 | 720 | 678 | 22  | Chinese cohorts | MAG | human body | oral cavity |
| RSZYD18187756_A_saliva.metaspades.bin.35 | CNA0070964 | 100   | 0    | 35.82 | 90.05 | TRUE | 675,620 | 710 | 669 | 23  | Chinese cohorts | MAG | human body | oral cavity |
| YS000007_saliva.spades.bin.7             | CNA0071549 | 100   | 2.33 | 43.36 | 91.65 | TRUE | 728,434 | 780 | 735 | 60  | Chinese cohorts | MAG | human body | oral cavity |
| YS000025_saliva.spades.bin.20            | CNA0071550 | 93.02 | 2.33 | 43.57 | 91.66 | TRUE | 636,530 | 682 | 642 | 121 | Chinese cohorts | MAG | human body | oral cavity |
| YS000027_saliva.spades.bin.12            | CNA0071551 | 90.7  | 2.33 | 43.81 | 93.02 | TRUE | 506,253 | 513 | 491 | 130 | Chinese cohorts | MAG | human body | oral cavity |
| YS000029_saliva.spades.bin.8             | CNA0071552 | 97.67 | 0    | 43.37 | 91.31 | TRUE | 685,047 | 734 | 692 | 75  | Chinese cohorts | MAG | human body | oral cavity |
| YS000034_saliva.spades.bin.2             | CNA0071553 | 100   | 0    | 43.16 | 91.12 | TRUE | 713,959 | 777 | 731 | 25  | Chinese cohorts | MAG | human body | oral cavity |
| YS000057_saliva.spades.bin.9             | CNA0071554 | 97.67 | 2.33 | 43.59 | 91.64 | TRUE | 666,826 | 708 | 669 | 59  | Chinese cohorts | MAG | human body | oral cavity |
| YS000063_saliva.spades.bin.11            | CNA0071555 | 97.67 | 0    | 43.40 | 91.93 | TRUE | 670,327 | 713 | 668 | 65  | Chinese cohorts | MAG | human body | oral cavity |
| YS000066_saliva.spades.bin.24            | CNA0071556 | 90.7  | 0    | 43.14 | 91.27 | TRUE | 721,378 | 782 | 737 | 98  | Chinese cohorts | MAG | human body | oral cavity |
| YS000073_saliva.spades.bin.20            | CNA0071557 | 93.02 | 4.65 | 43.53 | 92.45 | TRUE | 573,005 | 610 | 581 | 126 | Chinese cohorts | MAG | human body | oral cavity |
| YS000122_saliva.spades.bin.4             | CNA0071558 | 97.67 | 2.33 | 43.41 | 92.55 | TRUE | 643,626 | 688 | 646 | 100 | Chinese cohorts | MAG | human body | oral cavity |
| YS000126_saliva.spades.bin.17            | CNA0071559 | 97.67 | 2.33 | 43.46 | 91.92 | TRUE | 663,172 | 699 | 657 | 78  | Chinese cohorts | MAG | human body | oral cavity |
| YS000127_saliva.spades.bin.16            | CNA0071560 | 93.02 | 0    | 43.51 | 91.51 | TRUE | 688,771 | 725 | 685 | 77  | Chinese cohorts | MAG | human body | oral cavity |
| YS000131_saliva.spades.bin.17            | CNA0071561 | 93.02 | 0    | 43.29 | 92.73 | TRUE | 608,424 | 621 | 594 | 149 | Chinese cohorts | MAG | human body | oral cavity |
| YS000135_saliva.spades.bin.9             | CNA0071562 | 97.67 | 0    | 43.44 | 91.58 | TRUE | 693,533 | 735 | 688 | 52  | Chinese cohorts | MAG | human body | oral cavity |
| YS000142_saliva.spades.bin.13            | CNA0071563 | 93.02 | 0    | 43.75 | 92.09 | TRUE | 635,731 | 688 | 651 | 45  | Chinese cohorts | MAG | human body | oral cavity |
| YS000143_saliva.spades.bin.5             | CNA0071564 | 100   | 0    | 43.16 | 91.39 | TRUE | 770,555 | 819 | 773 | 38  | Chinese cohorts | MAG | human body | oral cavity |
| YS000161_saliva.spades.bin.8             | CNA0071565 | 90.7  | 2.33 | 36.36 | 91.75 | TRUE | 591,642 | 596 | 561 | 96  | Chinese cohorts | MAG | human body | oral cavity |
| YS000165_saliva.spades.bin.32            | CNA0071566 | 90.7  | 0    | 43.86 | 91.96 | TRUE | 574,211 | 601 | 567 | 78  | Chinese cohorts | MAG | human body | oral cavity |
| YS000166_saliva.spades.bin.9             | CNA0071567 | 95.35 | 0    | 43.02 | 91.24 | TRUE | 839,325 | 900 | 858 | 105 | Chinese cohorts | MAG | human body | oral cavity |
| YS000202_saliva.spades.bin.16            | CNA0071568 | 97.67 | 0    | 43.23 | 92.43 | TRUE | 671,744 | 692 | 655 | 100 | Chinese cohorts | MAG | human body | oral cavity |
| YS000205_saliva.spades.bin.1             | CNA0071569 | 100   | 0    | 43.19 | 91.95 | TRUE | 757,906 | 813 | 766 | 8   | Chinese cohorts | MAG | human body | oral cavity |
| YS000206_saliva.spades.bin.3             | CNA0071570 | 100   | 0    | 43.22 | 91.48 | TRUE | 726,396 | 783 | 737 | 8   | Chinese cohorts | MAG | human body | oral cavity |
| YS000207_saliva.spades.bin.17            | CNA0071571 | 93.02 | 2.33 | 43.36 | 92.35 | TRUE | 675,426 | 713 | 672 | 90  | Chinese cohorts | MAG | human body | oral cavity |
| YS000208_saliva.spades.bin.26            | CNA0071572 | 97.67 | 0    | 43.42 | 92.20 | TRUE | 611,075 | 650 | 615 | 126 | Chinese cohorts | MAG | human body | oral cavity |
| YS000209_saliva.spades.bin.15            | CNA0071573 | 100   | 0    | 43.21 | 91.65 | TRUE | 711,635 | 753 | 709 | 80  | Chinese cohorts | MAG | human body | oral cavity |
| YS000214_saliva.spades.bin.5             | CNA0071574 | 100   | 0    | 43.20 | 91.37 | TRUE | 733,340 | 798 | 752 | 6   | Chinese cohorts | MAG | human body | oral cavity |
| YS000216_saliva.spades.bin.15            | CNA0071575 | 93.02 | 0    | 43.18 | 91.85 | TRUE | 722,987 | 770 | 729 | 56  | Chinese cohorts | MAG | human body | oral cavity |
| YS000226_saliva.spades.bin.6             | CNA0071576 | 97.67 | 2.33 | 43.27 | 91.89 | TRUE | 717,729 | 762 | 720 | 105 | Chinese cohorts | MAG | human body | oral cavity |
| YS000227_saliva.spades.bin.28            | CNA0071577 | 95.35 | 0    | 43.80 | 91.89 | TRUE | 650,660 | 690 | 656 | 82  | Chinese cohorts | MAG | human body | oral cavity |
| YS000231_saliva.spades.bin.18            | CNA0071578 | 95.35 | 0    | 43.40 | 91.62 | TRUE | 684,161 | 748 | 703 | 69  | Chinese cohorts | MAG | human body | oral cavity |
| YS000234_saliva.spades.bin.16            | CNA0071579 | 93.02 | 0    | 43.64 | 92.11 | TRUE | 593,388 | 620 | 588 | 112 | Chinese cohorts | MAG | human body | oral cavity |
| YS000236_saliva.spades.bin.20            | CNA0071580 | 100   | 2.33 | 43.45 | 91.77 | TRUE | 706,729 | 768 | 729 | 9   | Chinese cohorts | MAG | human body | oral cavity |
| YS000246_saliva.spades.bin.34            | CNA0071581 | 97.67 | 2.33 | 43.20 | 91.58 | TRUE | 704,571 | 753 | 710 | 77  | Chinese cohorts | MAG | human body | oral cavity |
| YS000254_saliva.spades.bin.23            | CNA0071582 | 93.02 | 0    | 50.90 | 90.33 | TRUE | 729,495 | 692 | 648 | 52  | Chinese cohorts | MAG | human body | oral cavity |
| YS000257_saliva.spades.bin.31            | CNA0071583 | 100   | 0    | 36.31 | 91.25 | TRUE | 621,186 | 647 | 611 | 49  | Chinese cohorts | MAG | human body | oral cavity |
| YS000259_saliva.spades.bin.14            | CNA0071584 | 100   | 2.33 | 36.38 | 91.26 | TRUE | 612,599 | 633 | 600 | 74  | Chinese cohorts | MAG | human body | oral cavity |
| YS000259_saliva.spades.bin.23            | CNA0071585 | 97.67 | 0    | 43.21 | 91.58 | TRUE | 723,114 | 773 | 727 | 50  | Chinese cohorts | MAG | human body | oral cavity |
| YS000273_saliva.spades.bin.9             | CNA0071586 | 95.35 | 2.33 | 43.75 | 91.86 | TRUE | 627,518 | 665 | 626 | 41  | Chinese cohorts | MAG | human body | oral cavity |
| YS000274_saliva.spades.bin.38            | CNA0071587 | 95.35 | 0    | 43.70 | 92.20 | TRUE | 603,341 | 632 | 600 | 73  | Chinese cohorts | MAG | human body | oral cavity |
| YS000275_saliva.spades.bin.17            | CNA0071588 | 97.67 | 0    | 43.09 | 91.82 | TRUE | 724,831 | 765 | 722 | 37  | Chinese cohorts | MAG | human body | oral cavity |
| YS000282_saliva.spades.bin.24            | CNA0071589 | 100   | 4.65 | 43.03 | 92.14 | TRUE | 734,005 | 795 | 751 | 8   | Chinese cohorts | MAG | human body | oral cavity |
| YS000290_saliva.spades.bin.16            | CNA0071590 | 97.67 | 0    | 43.59 | 91.93 | TRUE | 665,501 | 688 | 650 | 116 | Chinese cohorts | MAG | human body | oral cavity |
| YS000296_saliva.spades.bin.5             | CNA0071591 | 97.67 | 0    | 43.30 | 91.54 | TRUE | 693,509 | 742 | 697 | 43  | Chinese cohorts | MAG | human body | oral cavity |
| YS000298_saliva.spades.bin.49            | CNA0071592 | 90.7  | 0    | 43.80 | 91.90 | TRUE | 517,123 | 535 | 506 | 117 | Chinese cohorts | MAG | human body | oral cavity |
| YS000299_saliva.spades.bin.16            | CNA0071593 | 95.35 | 0    | 43.78 | 92.08 | TRUE | 588,126 | 608 | 578 | 91  | Chinese cohorts | MAG | human body | oral cavity |
| YS000305_saliva.spades.bin.4             | CNA0071594 | 97.67 | 0    | 43.37 | 91.21 | TRUE | 708,287 | 760 | 714 | 38  | Chinese cohorts | MAG | human body | oral cavity |
| YS000324_saliva.spades.bin.7             | CNA0071595 | 100   | 0    | 43.23 | 92.53 | TRUE | 735,629 | 783 | 738 | 65  | Chinese cohorts | MAG | human body | oral cavity |
| YS000331_saliva.spades.bin.6             | CNA0071596 | 97.67 | 0    | 43.32 | 92.18 | TRUE | 511,005 | 545 | 517 | 147 | Chinese cohorts | MAG | human body | oral cavity |
| YS000348_saliva.spades.bin.15            | CNA0071597 | 97.67 | 0    | 43.26 | 91.76 | TRUE | 692,106 | 727 | 685 | 99  | Chinese cohorts | MAG | human body | oral cavity |
| YS000360_saliva.spades.bin.8             | CNA0071598 | 100   | 2.33 | 43.34 | 91.09 | TRUE | 743,078 | 803 | 757 | 44  | Chinese cohorts | MAG | human body | oral cavity |
| YS000361_saliva.spades.bin.9             | CNA0071599 | 100   | 0    | 43.21 | 91.58 | TRUE | 728,291 | 784 | 739 | 8   | Chinese cohorts | MAG | human body | oral cavity |
| YS000364_saliva.spades.bin.27            | CNA0071600 | 100   | 4.65 | 43.39 | 92.53 | TRUE | 662,109 | 699 | 660 | 111 | Chinese cohorts | MAG | human body | oral cavity |
| YS000367_saliva.spades.bin.21            | CNA0071601 | 100   | 2.33 | 43.14 | 91.95 | TRUE | 744,128 | 805 | 759 | 9   | Chinese cohorts | MAG | human body | oral cavity |
| YS000371_saliva.spades.bin.7             | CNA0071602 | 97.67 | 0    | 43.20 | 92.72 | TRUE | 679,608 | 713 | 676 | 35  | Chinese cohorts | MAG | human body | oral cavity |
| YS000373_saliva.spades.bin.23            | CNA0071603 | 93.02 | 2.33 | 43.29 | 91.80 | TRUE | 707,992 | 757 | 712 | 62  | Chinese cohorts | MAG | human body | oral cavity |
| YS000374_saliva.spades.bin.11            | CNA0071604 | 90.7  | 4.65 | 43.39 | 91.68 | TRUE | 656,712 | 694 | 653 | 76  | Chinese cohorts | MAG | human body | oral cavity |
| YS000376_saliva.spades.bin.26            | CNA0071605 | 100   | 0    | 43.04 | 91.23 | TRUE | 767,632 | 855 | 810 | 18  | Chinese cohorts | MAG | human body | oral cavity |
| YS000381_saliva.spades.bin.25            | CNA0071606 | 95.35 | 2.33 | 43.76 | 92.48 | TRUE | 574,693 | 614 | 588 | 29  | Chinese cohorts | MAG | human body | oral cavity |
| YS000385_saliva.spades.bin.1             | CNA0071607 | 95.35 | 0    | 43.55 | 92.08 | TRUE | 646,270 | 697 | 662 | 38  | Chinese cohorts | MAG | human body | oral cavity |

|                                                      |            |       |      |       |       |      |           |      |     |     |                 |     |            |             |
|------------------------------------------------------|------------|-------|------|-------|-------|------|-----------|------|-----|-----|-----------------|-----|------------|-------------|
| YS000391_saliva.spades.bin.1                         | CNA0071608 | 97.67 | 2.33 | 43.69 | 91.65 | TRUE | 632,346   | 665  | 630 | 67  | Chinese cohorts | MAG | human body | oral cavity |
| YS000394_saliva.spades.bin.25                        | CNA0071609 | 95.35 | 0    | 43.69 | 93.29 | TRUE | 557,907   | 592  | 557 | 103 | Chinese cohorts | MAG | human body | oral cavity |
| YS000402_saliva.spades.bin.13                        | CNA0071610 | 95.35 | 2.33 | 43.89 | 92.59 | TRUE | 619,390   | 648  | 617 | 74  | Chinese cohorts | MAG | human body | oral cavity |
| YS000410_saliva.spades.bin.12                        | CNA0071611 | 95.35 | 0    | 43.75 | 91.15 | TRUE | 647,201   | 701  | 663 | 53  | Chinese cohorts | MAG | human body | oral cavity |
| YS000411_saliva.spades.bin.13                        | CNA0071612 | 100   | 2.33 | 43.16 | 91.45 | TRUE | 715,072   | 773  | 726 | 27  | Chinese cohorts | MAG | human body | oral cavity |
| YS000416_saliva.spades.bin.11                        | CNA0071613 | 97.67 | 0    | 43.35 | 91.23 | TRUE | 692,776   | 731  | 686 | 99  | Chinese cohorts | MAG | human body | oral cavity |
| YS000433_saliva.spades.bin.7                         | CNA0071614 | 90.7  | 0    | 43.55 | 93.07 | TRUE | 603,547   | 621  | 590 | 108 | Chinese cohorts | MAG | human body | oral cavity |
| YS000438_saliva.spades.bin.9                         | CNA0071615 | 95.35 | 0    | 43.72 | 92.09 | TRUE | 594,885   | 622  | 592 | 44  | Chinese cohorts | MAG | human body | oral cavity |
| YS000444_saliva.spades.bin.11                        | CNA0071616 | 100   | 0    | 35.11 | 90.43 | TRUE | 622,894   | 639  | 603 | 6   | Chinese cohorts | MAG | human body | oral cavity |
| YS000449_saliva.spades.bin.9                         | CNA0071617 | 97.67 | 0    | 43.39 | 92.12 | TRUE | 685,320   | 729  | 683 | 69  | Chinese cohorts | MAG | human body | oral cavity |
| YS000455_saliva.spades.bin.37                        | CNA0071618 | 95.35 | 0    | 43.45 | 92.35 | TRUE | 632,802   | 659  | 627 | 125 | Chinese cohorts | MAG | human body | oral cavity |
| YS000456_saliva.spades.bin.18                        | CNA0071619 | 100   | 0    | 43.28 | 91.33 | TRUE | 734,393   | 806  | 759 | 16  | Chinese cohorts | MAG | human body | oral cavity |
| YS000462_saliva.spades.bin.8                         | CNA0071620 | 93.02 | 0    | 43.53 | 92.34 | TRUE | 622,556   | 676  | 638 | 51  | Chinese cohorts | MAG | human body | oral cavity |
| YS000463_saliva.spades.bin.2                         | CNA0071621 | 90.7  | 0    | 43.60 | 92.21 | TRUE | 637,107   | 683  | 649 | 87  | Chinese cohorts | MAG | human body | oral cavity |
| YS000473_saliva.spades.bin.3                         | CNA0071622 | 90.7  | 2.33 | 43.22 | 91.85 | TRUE | 663,385   | 708  | 668 | 99  | Chinese cohorts | MAG | human body | oral cavity |
| YS000487_saliva.spades.bin.36                        | CNA0071623 | 97.67 | 4.65 | 43.80 | 91.44 | TRUE | 659,613   | 716  | 679 | 71  | Chinese cohorts | MAG | human body | oral cavity |
| YS000527_saliva.spades.bin.34                        | CNA0071624 | 90.7  | 0    | 43.84 | 91.72 | TRUE | 497,177   | 535  | 506 | 14  | Chinese cohorts | MAG | human body | oral cavity |
| YS000532_saliva.spades.bin.18                        | CNA0071625 | 95.35 | 0    | 43.64 | 92.15 | TRUE | 654,308   | 700  | 665 | 45  | Chinese cohorts | MAG | human body | oral cavity |
| YS000535_saliva.spades.bin.35                        | CNA0071626 | 95.35 | 0    | 43.22 | 92.95 | TRUE | 661,666   | 701  | 666 | 88  | Chinese cohorts | MAG | human body | oral cavity |
| YS000541_saliva.spades.bin.2                         | CNA0071627 | 90.7  | 4.65 | 43.94 | 93.32 | TRUE | 504,398   | 518  | 497 | 105 | Chinese cohorts | MAG | human body | oral cavity |
| YS000545_saliva.spades.bin.26                        | CNA0071628 | 97.67 | 0    | 43.37 | 91.77 | TRUE | 679,622   | 726  | 686 | 73  | Chinese cohorts | MAG | human body | oral cavity |
| YS000546_saliva.spades.bin.3                         | CNA0071629 | 95.35 | 0    | 43.33 | 91.97 | TRUE | 694,352   | 744  | 706 | 28  | Chinese cohorts | MAG | human body | oral cavity |
| YS000547_saliva.spades.bin.14                        | CNA0071630 | 100   | 2.33 | 43.58 | 91.18 | TRUE | 699,636   | 757  | 713 | 78  | Chinese cohorts | MAG | human body | oral cavity |
| YS000553_saliva.spades.bin.6                         | CNA0071631 | 95.35 | 0    | 43.57 | 92.56 | TRUE | 613,393   | 649  | 619 | 141 | Chinese cohorts | MAG | human body | oral cavity |
| YS000581_saliva.spades.bin.8                         | CNA0071632 | 100   | 4.65 | 43.34 | 91.82 | TRUE | 677,400   | 724  | 681 | 73  | Chinese cohorts | MAG | human body | oral cavity |
| YS000587_saliva.spades.bin.10                        | CNA0071633 | 90.7  | 0    | 43.49 | 91.99 | TRUE | 719,755   | 792  | 754 | 47  | Chinese cohorts | MAG | human body | oral cavity |
| YS000592_saliva.spades.bin.16                        | CNA0071634 | 100   | 0    | 43.09 | 91.53 | TRUE | 739,020   | 810  | 763 | 17  | Chinese cohorts | MAG | human body | oral cavity |
| YS000604_saliva.spades.bin.11                        | CNA0071635 | 95.35 | 0    | 43.15 | 92.03 | TRUE | 603,099   | 643  | 605 | 123 | Chinese cohorts | MAG | human body | oral cavity |
| YS000607_saliva.spades.bin.9                         | CNA0071636 | 97.67 | 0    | 43.44 | 92.40 | TRUE | 600,266   | 611  | 578 | 134 | Chinese cohorts | MAG | human body | oral cavity |
| YS000608_saliva.spades.bin.2                         | CNA0071637 | 93.02 | 0    | 43.55 | 92.52 | TRUE | 562,440   | 572  | 545 | 110 | Chinese cohorts | MAG | human body | oral cavity |
| YS000609_saliva.spades.bin.19                        | CNA0071638 | 97.67 | 2.33 | 43.24 | 92.01 | TRUE | 684,486   | 746  | 702 | 90  | Chinese cohorts | MAG | human body | oral cavity |
| YS000625_saliva.spades.bin.29                        | CNA0071639 | 93.02 | 0    | 43.83 | 91.06 | TRUE | 640,758   | 696  | 663 | 20  | Chinese cohorts | MAG | human body | oral cavity |
| YS000632_saliva.spades.bin.35                        | CNA0071640 | 97.67 | 2.33 | 43.47 | 91.17 | TRUE | 633,855   | 679  | 638 | 97  | Chinese cohorts | MAG | human body | oral cavity |
| YS000651_saliva.spades.bin.17                        | CNA0071641 | 100   | 0    | 43.31 | 91.54 | TRUE | 730,783   | 797  | 749 | 21  | Chinese cohorts | MAG | human body | oral cavity |
| YS000678_saliva.spades.bin.12                        | CNA0071642 | 97.67 | 0    | 43.59 | 91.82 | TRUE | 654,765   | 693  | 658 | 86  | Chinese cohorts | MAG | human body | oral cavity |
| YS000685_saliva.spades.bin.9                         | CNA0071643 | 100   | 0    | 43.48 | 92.01 | TRUE | 653,858   | 693  | 654 | 104 | Chinese cohorts | MAG | human body | oral cavity |
| YS000721_saliva.spades.bin.7                         | CNA0071644 | 100   | 0    | 36.37 | 91.30 | TRUE | 642,410   | 665  | 630 | 37  | Chinese cohorts | MAG | human body | oral cavity |
| YS000722_saliva.spades.bin.22                        | CNA0071645 | 93.02 | 2.33 | 43.22 | 91.59 | TRUE | 678,005   | 723  | 685 | 98  | Chinese cohorts | MAG | human body | oral cavity |
| YS000725_saliva.spades.bin.43                        | CNA0071646 | 97.67 | 0    | 43.50 | 92.05 | TRUE | 679,151   | 712  | 675 | 96  | Chinese cohorts | MAG | human body | oral cavity |
| YS000726_saliva.spades.bin.20                        | CNA0071647 | 100   | 0    | 43.10 | 91.83 | TRUE | 704,518   | 769  | 725 | 29  | Chinese cohorts | MAG | human body | oral cavity |
| YS000740_saliva.spades.bin.23                        | CNA0071648 | 95.35 | 0    | 43.60 | 92.30 | TRUE | 629,778   | 675  | 636 | 42  | Chinese cohorts | MAG | human body | oral cavity |
| YS000754_saliva.spades.bin.30                        | CNA0071649 | 97.67 | 0    | 43.05 | 90.96 | TRUE | 775,348   | 837  | 791 | 51  | Chinese cohorts | MAG | human body | oral cavity |
| YS000758_saliva.spades.bin.5                         | CNA0071650 | 97.67 | 0    | 43.25 | 92.23 | TRUE | 665,707   | 701  | 663 | 123 | Chinese cohorts | MAG | human body | oral cavity |
| YS000759_saliva.spades.bin.28                        | CNA0071651 | 90.7  | 0    | 43.88 | 90.60 | TRUE | 614,039   | 663  | 626 | 6   | Chinese cohorts | MAG | human body | oral cavity |
| YS000871_saliva.spades.bin.22                        | CNA0071652 | 93.02 | 2.33 | 43.81 | 92.64 | TRUE | 600,889   | 619  | 592 | 47  | Chinese cohorts | MAG | human body | oral cavity |
| YS000883_saliva.spades.bin.12                        | CNA0071653 | 93.02 | 0    | 43.52 | 92.03 | TRUE | 635,779   | 674  | 644 | 81  | Chinese cohorts | MAG | human body | oral cavity |
| YS000906_saliva.spades.bin.34                        | CNA0071654 | 97.67 | 0    | 43.69 | 91.35 | TRUE | 665,690   | 715  | 674 | 79  | Chinese cohorts | MAG | human body | oral cavity |
| YS000915_saliva.spades.bin.1                         | CNA0071655 | 100   | 4.65 | 43.38 | 91.92 | TRUE | 662,671   | 719  | 677 | 64  | Chinese cohorts | MAG | human body | oral cavity |
| YS000918_saliva.spades.bin.33                        | CNA0071656 | 95.35 | 2.33 | 43.30 | 93.05 | TRUE | 709,294   | 757  | 718 | 27  | Chinese cohorts | MAG | human body | oral cavity |
| YS000921_saliva.spades.bin.23                        | CNA0071657 | 95.35 | 0    | 43.52 | 92.93 | TRUE | 608,003   | 630  | 600 | 128 | Chinese cohorts | MAG | human body | oral cavity |
| YS000922_saliva.spades.bin.6                         | CNA0071658 | 95.35 | 0    | 43.57 | 92.10 | TRUE | 585,373   | 624  | 594 | 54  | Chinese cohorts | MAG | human body | oral cavity |
| YS000926_saliva.spades.bin.2                         | CNA0071659 | 100   | 4.65 | 43.25 | 91.73 | TRUE | 739,708   | 806  | 762 | 41  | Chinese cohorts | MAG | human body | oral cavity |
| YS000927_saliva.spades.bin.50                        | CNA0071660 | 95.35 | 0    | 43.70 | 92.08 | TRUE | 619,618   | 661  | 629 | 63  | Chinese cohorts | MAG | human body | oral cavity |
| YS000928_saliva.spades.bin.8                         | CNA0071661 | 97.67 | 0    | 43.40 | 92.94 | TRUE | 639,827   | 676  | 640 | 108 | Chinese cohorts | MAG | human body | oral cavity |
| YS000932_saliva.spades.bin.7                         | CNA0071662 | 100   | 0    | 35.33 | 90.56 | TRUE | 702,823   | 750  | 714 | 20  | Chinese cohorts | MAG | human body | oral cavity |
| YS000948_saliva.spades.bin.2                         | CNA0071663 | 100   | 0    | 43.32 | 91.30 | TRUE | 739,662   | 786  | 741 | 16  | Chinese cohorts | MAG | human body | oral cavity |
| YS001002_saliva.spades.bin.13                        | CNA0071664 | 95.35 | 0    | 43.43 | 91.63 | TRUE | 676,966   | 707  | 664 | 84  | Chinese cohorts | MAG | human body | oral cavity |
| YS001023_saliva.spades.bin.13                        | CNA0071665 | 100   | 2.33 | 43.28 | 90.99 | TRUE | 712,669   | 776  | 729 | 43  | Chinese cohorts | MAG | human body | oral cavity |
| YS001048_saliva.spades.bin.21                        | CNA0071666 | 100   | 0    | 43.25 | 90.88 | TRUE | 722,654   | 788  | 740 | 54  | Chinese cohorts | MAG | human body | oral cavity |
| YS001052_saliva.spades.bin.13                        | CNA0071667 | 93.02 | 0    | 43.54 | 91.64 | TRUE | 603,350   | 633  | 602 | 131 | Chinese cohorts | MAG | human body | oral cavity |
| YS001064_saliva.spades.bin.3                         | CNA0071668 | 95.35 | 0    | 43.13 | 91.47 | TRUE | 705,007   | 765  | 719 | 18  | Chinese cohorts | MAG | human body | oral cavity |
| YS001069_saliva.spades.bin.6                         | CNA0071669 | 95.35 | 0    | 43.22 | 92.15 | TRUE | 744,824   | 790  | 746 | 46  | Chinese cohorts | MAG | human body | oral cavity |
| YS001090_saliva.spades.bin.11                        | CNA0071670 | 100   | 2.33 | 43.15 | 91.61 | TRUE | 766,821   | 812  | 765 | 12  | Chinese cohorts | MAG | human body | oral cavity |
| YS001127_saliva.spades.bin.3                         | CNA0071671 | 100   | 0    | 43.22 | 92.39 | TRUE | 745,086   | 790  | 749 | 81  | Chinese cohorts | MAG | human body | oral cavity |
| YS001129_saliva.spades.bin.13                        | CNA0071672 | 100   | 0    | 43.28 | 90.90 | TRUE | 696,524   | 752  | 707 | 19  | Chinese cohorts | MAG | human body | oral cavity |
| YS001130_saliva.spades.bin.26                        | CNA0071673 | 97.67 | 2.33 | 43.44 | 91.72 | TRUE | 692,310   | 754  | 717 | 101 | Chinese cohorts | MAG | human body | oral cavity |
| YS001132_saliva.spades.bin.25                        | CNA0071674 | 97.67 | 2.33 | 43.01 | 91.29 | TRUE | 743,735   | 797  | 755 | 117 | Chinese cohorts | MAG | human body | oral cavity |
| YS001151_saliva.spades.bin.14                        | CNA0071675 | 93.02 | 0    | 43.48 | 92.72 | TRUE | 584,221   | 612  | 588 | 141 | Chinese cohorts | MAG | human body | oral cavity |
| YS001157_saliva.spades.bin.8                         | CNA0071676 | 93.02 | 2.33 | 43.44 | 91.65 | TRUE | 661,760   | 722  | 682 | 27  | Chinese cohorts | MAG | human body | oral cavity |
| YS001160_saliva.spades.bin.8                         | CNA0071677 | 100   | 0    | 43.07 | 91.39 | TRUE | 730,742   | 787  | 740 | 9   | Chinese cohorts | MAG | human body | oral cavity |
| GCA_943914775.1_Tcv98XDF6C_bin.50.MAG                | CNA0070830 | 100   | 4.65 | 47.67 | 91.46 | TRUE | 870,518   | 921  | 876 | 19  | NCBI assembly   | MAG | human body | skin        |
| GCA_946222005.1_ZZEVbxAAOO_bin.25.MAG                | CNA0070834 | 100   | 0    | 52.11 | 85.48 | TRUE | 1,004,085 | 1013 | 965 | 12  | NCBI assembly   | MAG | human body | skin        |
| GCA_004136275.1_ASM413627v1                          | CNA0070079 | 97.67 | 0    | 47.56 | 90.62 | TRUE | 723,184   | 734  | 686 | 3   | NCBI assembly   | MAG | human body | vagina      |
| GCA_946890675.1_ERR9530663_bin.14_metaWRAP_v1.3_MAG  | CNA0070875 | 97.67 | 0    | 47.82 | 90.98 | TRUE | 703,182   | 699  | 650 | 7   | NCBI assembly   | MAG | human body | vagina      |
| GCA_946890795.1_SRR12830924_bin.6_metaWRAP_v1.3_MAG  | CNA0070876 | 97.67 | 0    | 47.78 | 91.11 | TRUE | 678,213   | 671  | 622 | 2   | NCBI assembly   | MAG | human body | vagina      |
| GCA_946890805.1_SRR12830918_bin.6_metaWRAP_v1.3_MAG  | CNA0070878 | 97.67 | 0    | 47.93 | 91.07 | TRUE | 694,644   | 709  | 662 | 57  | NCBI assembly   | MAG | human body | vagina      |
| GCA_946997535.1_SRR16916865_bin.12_metaWRAP_v1.3_MAG | CNA0070880 | 97.67 | 0    | 47.63 | 91.45 | TRUE | 718,299   | 721  | 677 | 18  | NCBI assembly   | MAG | human body | vagina      |
| GCA_946998385.1_SRR16916860_bin.6_metaWRAP_v1.3_MAG  | CNA0070882 | 97.67 | 0    | 47.70 | 91.51 | TRUE | 687,724   | 684  | 640 | 9   | NCBI assembly   | MAG | human body | vagina      |
| GCA_947090635.1_SRR11749285_bin.3_metaWRAP_v1.3_MAG  | CNA0070892 | 97.67 | 0    | 47.41 | 90.82 | TRUE | 746,250   | 730  | 684 | 25  | NCBI assembly   | MAG | human body | vagina      |
| GCA_947253235.1_SRR17635697_bin.12_metaWRAP_v1.3_MAG | CNA0070910 | 95.35 | 0    | 47.43 | 92.10 | TRUE | 697,622   | 673  | 630 | 34  | NCBI assembly   | MAG | human body | vagina      |
| GCA_947253405.1_SRR17635715_bin.15_metaWRAP_v1.3_MAG | CNA0070912 | 93.02 | 0    | 38.49 | 92.67 | TRUE | 552,153   | 534  | 497 | 49  | NCBI assembly   | MAG | human body | vagina      |



|                                                     |            |       |      |       |       |      |           |      |      |     |               |         |               |        |
|-----------------------------------------------------|------------|-------|------|-------|-------|------|-----------|------|------|-----|---------------|---------|---------------|--------|
| GCA_947253565.1_SRR17635649_bin.4_metaWRAP_v1.3_MAG | CNA0070913 | 97.67 | 0    | 47.67 | 91.24 | TRUE | 695,978   | 701  | 657  | 17  | NCBI assembly | MAG     | human body    | vagina |
| GCA_947253945.1_SRR17635701_bin.9_metaWRAP_v1.3_MAG | CNA0070915 | 97.67 | 0    | 47.99 | 91.64 | TRUE | 684,072   | 670  | 627  | 13  | NCBI assembly | MAG     | human body    | vagina |
| GCA_947253955.1_SRR17635595_bin.5_metaWRAP_v1.3_MAG | CNA0070916 | 97.67 | 0    | 47.68 | 91.65 | TRUE | 688,337   | 678  | 634  | 11  | NCBI assembly | MAG     | human body    | vagina |
| GCA_025273655.1_ASM2527365v1                        | CNA0070599 | 100   | 0    | 50.44 | 91.51 | TRUE | 1,081,308 | 1191 | 1146 | 1   | NCBI assembly | Isolate | engineered    | NA     |
| GCA_025349965.1_ASM2534996v1                        | CNA0070600 | 97.67 | 2.33 | 47.72 | 91.50 | TRUE | 780,698   | 819  | 779  | 1   | NCBI assembly | Isolate | insects       | NA     |
| GCA_000392435.1_ASM39243v1                          | CNA0069821 | 100   | 0    | 48.51 | 91.14 | TRUE | 1,013,781 | 1097 | 1048 | 1   | NCBI assembly | MAG     | engineered    | NA     |
| GCA_000503915.1_ASM50391v1                          | CNA0069825 | 97.67 | 0    | 49.40 | 90.87 | TRUE | 845,464   | 961  | 916  | 1   | NCBI assembly | MAG     | natural       | NA     |
| GCA_001003725.1_ASM100372v1                         | CNA0069833 | 95.35 | 0    | 47.59 | 90.97 | TRUE | 1,067,676 | 1190 | 1150 | 44  | NCBI assembly | MAG     | natural       | NA     |
| GCA_001029695.1_ASM102969v1                         | CNA0069837 | 100   | 0    | 45.99 | 90.38 | TRUE | 1,038,683 | 1133 | 1089 | 1   | NCBI assembly | MAG     | natural       | NA     |
| GCA_001788555.1_ASM178855v1                         | CNA0069840 | 93.02 | 0    | 49.34 | 90.82 | TRUE | 509,429   | 577  | 547  | 39  | NCBI assembly | MAG     | natural       | NA     |
| GCA_001788565.1_ASM178856v1                         | CNA0069844 | 95.35 | 0    | 49.17 | 90.13 | TRUE | 687,546   | 761  | 718  | 56  | NCBI assembly | MAG     | natural       | NA     |
| GCA_001790365.1_ASM179036v1                         | CNA0069847 | 100   | 0    | 45.40 | 90.12 | TRUE | 1,220,755 | 1299 | 1260 | 19  | NCBI assembly | MAG     | natural       | NA     |
| GCA_001790385.1_ASM179038v1                         | CNA0069850 | 100   | 0    | 45.84 | 90.48 | TRUE | 1,107,611 | 1201 | 1164 | 4   | NCBI assembly | MAG     | natural       | NA     |
| GCA_001790435.1_ASM179043v1                         | CNA0069854 | 95.35 | 0    | 45.41 | 89.27 | TRUE | 1,173,572 | 1256 | 1218 | 100 | NCBI assembly | MAG     | natural       | NA     |
| GCA_001790445.1_ASM179044v1                         | CNA0069857 | 97.67 | 0    | 41.18 | 90.61 | TRUE | 856,182   | 925  | 886  | 13  | NCBI assembly | MAG     | natural       | NA     |
| GCA_001790455.1_ASM179045v1                         | CNA0069860 | 93.02 | 0    | 46.79 | 88.61 | TRUE | 661,502   | 736  | 701  | 148 | NCBI assembly | MAG     | natural       | NA     |
| GCA_001790515.1_ASM179051v1                         | CNA0069864 | 100   | 0    | 45.37 | 90.25 | TRUE | 1,231,371 | 1305 | 1264 | 18  | NCBI assembly | MAG     | natural       | NA     |
| GCA_001790525.1_ASM179052v1                         | CNA0069867 | 97.67 | 0    | 46.63 | 89.43 | TRUE | 793,886   | 909  | 864  | 35  | NCBI assembly | MAG     | natural       | NA     |
| GCA_001790535.1_ASM179053v1                         | CNA0069870 | 100   | 0    | 46.21 | 90.58 | TRUE | 1,027,473 | 1111 | 1073 | 18  | NCBI assembly | MAG     | natural       | NA     |
| GCA_001790625.1_ASM179062v1                         | CNA0069873 | 90.7  | 0    | 49.17 | 90.74 | TRUE | 664,287   | 743  | 702  | 63  | NCBI assembly | MAG     | natural       | NA     |
| GCA_001873625.1_ASM187362v1                         | CNA0069877 | 97.67 | 2.33 | 40.56 | 89.55 | TRUE | 825,475   | 841  | 799  | 15  | NCBI assembly | MAG     | natural       | NA     |
| GCA_001897295.1_ASM189729v1                         | CNA0069880 | 97.67 | 0    | 49.51 | 91.82 | TRUE | 904,897   | 972  | 929  | 3   | NCBI assembly | MAG     | engineered    | NA     |
| GCA_001897305.1_ASM189730v1                         | CNA0069884 | 97.67 | 0    | 46.59 | 91.22 | TRUE | 900,471   | 954  | 910  | 1   | NCBI assembly | MAG     | engineered    | NA     |
| GCA_002304695.1_ASM230469v1                         | CNA0069887 | 95.35 | 2.33 | 49.90 | 86.44 | TRUE | 813,567   | 888  | 859  | 144 | NCBI assembly | MAG     | engineered    | NA     |
| GCA_002309075.1_ASM230907v1                         | CNA0069891 | 95.35 | 0    | 40.95 | 91.94 | TRUE | 610,597   | 623  | 584  | 42  | NCBI assembly | MAG     | natural       | NA     |
| GCA_002313515.1_ASM231351v1                         | CNA0069894 | 97.67 | 0    | 47.24 | 89.70 | TRUE | 785,679   | 782  | 729  | 16  | NCBI assembly | MAG     | other mammals | NA     |
| GCA_002316545.1_ASM231654v1                         | CNA0069898 | 97.67 | 4.65 | 47.20 | 91.90 | TRUE | 928,276   | 1009 | 966  | 5   | NCBI assembly | MAG     | engineered    | NA     |
| GCA_002322785.1_ASM232278v1                         | CNA0069901 | 100   | 0    | 48.56 | 89.80 | TRUE | 959,870   | 1037 | 993  | 64  | NCBI assembly | MAG     | engineered    | NA     |
| GCA_002323055.1_ASM232305v1                         | CNA0069904 | 93.02 | 2.33 | 40.57 | 89.57 | TRUE | 757,666   | 782  | 740  | 13  | NCBI assembly | MAG     | natural       | NA     |
| GCA_002331045.1_ASM233104v1                         | CNA0069907 | 97.67 | 0    | 47.01 | 90.92 | TRUE | 901,221   | 964  | 930  | 68  | NCBI assembly | MAG     | natural       | NA     |
| GCA_002335175.1_ASM233517v1                         | CNA0069910 | 97.67 | 0    | 49.91 | 91.97 | TRUE | 875,335   | 995  | 955  | 3   | NCBI assembly | MAG     | engineered    | NA     |
| GCA_002336935.1_ASM233693v1                         | CNA0069913 | 100   | 2.33 | 48.56 | 92.53 | TRUE | 949,626   | 1026 | 995  | 21  | NCBI assembly | MAG     | engineered    | NA     |
| GCA_002337095.1_ASM233709v1                         | CNA0069916 | 95.35 | 4.65 | 53.17 | 90.70 | TRUE | 860,108   | 872  | 837  | 18  | NCBI assembly | MAG     | engineered    | NA     |
| GCA_002337155.1_ASM233715v1                         | CNA0069919 | 95.35 | 0    | 48.89 | 91.09 | TRUE | 884,516   | 957  | 915  | 25  | NCBI assembly | MAG     | engineered    | NA     |
| GCA_002343385.1_ASM234338v1                         | CNA0069922 | 97.67 | 0    | 51.47 | 92.36 | TRUE | 794,154   | 900  | 863  | 25  | NCBI assembly | MAG     | engineered    | NA     |
| GCA_002343565.1_ASM234356v1                         | CNA0069925 | 95.35 | 0    | 50.66 | 90.15 | TRUE | 813,862   | 902  | 868  | 76  | NCBI assembly | MAG     | engineered    | NA     |
| GCA_002343645.1_ASM234364v1                         | CNA0069928 | 97.67 | 0    | 51.42 | 92.37 | TRUE | 819,504   | 927  | 884  | 12  | NCBI assembly | MAG     | engineered    | NA     |
| GCA_002344715.1_ASM234471v1                         | CNA0069931 | 97.67 | 0    | 51.31 | 91.25 | TRUE | 888,330   | 1002 | 961  | 19  | NCBI assembly | MAG     | engineered    | NA     |
| GCA_002344735.1_ASM234473v1                         | CNA0069934 | 93.02 | 0    | 49.90 | 89.71 | TRUE | 821,691   | 924  | 884  | 37  | NCBI assembly | MAG     | engineered    | NA     |
| GCA_002348615.1_ASM234861v1                         | CNA0069937 | 97.67 | 0    | 51.31 | 92.08 | TRUE | 832,115   | 946  | 904  | 12  | NCBI assembly | MAG     | engineered    | NA     |
| GCA_002350545.1_ASM235054v1                         | CNA0069939 | 100   | 0    | 41.86 | 89.51 | TRUE | 720,973   | 755  | 720  | 87  | NCBI assembly | MAG     | other mammals | NA     |
| GCA_002363125.1_ASM236312v1                         | CNA0069942 | 97.67 | 0    | 39.69 | 92.54 | TRUE | 645,624   | 686  | 641  | 20  | NCBI assembly | MAG     | other mammals | NA     |
| GCA_002371235.1_ASM237123v1                         | CNA0069945 | 100   | 0    | 42.19 | 90.26 | TRUE | 719,243   | 687  | 646  | 36  | NCBI assembly | MAG     | other mammals | NA     |
| GCA_002371895.1_ASM237189v1                         | CNA0069948 | 100   | 2.33 | 45.38 | 91.68 | TRUE | 897,989   | 917  | 872  | 25  | NCBI assembly | MAG     | other mammals | NA     |
| GCA_002381485.1_ASM238148v1                         | CNA0069950 | 97.67 | 0    | 49.68 | 78.13 | TRUE | 664,051   | 695  | 661  | 211 | NCBI assembly | MAG     | natural       | NA     |
| GCA_002381545.1_ASM238154v1                         | CNA0069953 | 90.7  | 2.33 | 47.27 | 86.53 | TRUE | 726,308   | 780  | 740  | 83  | NCBI assembly | MAG     | natural       | NA     |
| GCA_002404125.1_ASM240412v1                         | CNA0069956 | 93.02 | 0    | 52.56 | 82.90 | TRUE | 1,051,590 | 1087 | 1045 | 93  | NCBI assembly | MAG     | natural       | NA     |
| GCA_002404195.1_ASM240419v1                         | CNA0069958 | 93.02 | 0    | 49.24 | 86.00 | TRUE | 879,943   | 986  | 953  | 105 | NCBI assembly | MAG     | natural       | NA     |
| GCA_002404255.1_ASM240425v1                         | CNA0069961 | 95.35 | 0    | 53.31 | 85.11 | TRUE | 1,048,123 | 1179 | 1145 | 181 | NCBI assembly | MAG     | natural       | NA     |
| GCA_002404315.1_ASM240431v1                         | CNA0069964 | 97.67 | 0    | 47.31 | 90.73 | TRUE | 726,146   | 780  | 743  | 9   | NCBI assembly | MAG     | natural       | NA     |
| GCA_002405335.1_ASM240533v1                         | CNA0069967 | 95.35 | 0    | 52.15 | 89.23 | TRUE | 1,140,771 | 1204 | 1161 | 38  | NCBI assembly | MAG     | natural       | NA     |
| GCA_002413425.1_ASM241342v1                         | CNA0069969 | 95.35 | 0    | 47.02 | 89.49 | TRUE | 779,530   | 867  | 824  | 19  | NCBI assembly | MAG     | natural       | NA     |
| GCA_002413755.1_ASM241375v1                         | CNA0069972 | 90.7  | 0    | 53.04 | 83.43 | TRUE | 1,118,467 | 1219 | 1178 | 185 | NCBI assembly | MAG     | natural       | NA     |
| GCA_002413795.1_ASM241379v1                         | CNA0069975 | 95.35 | 0    | 54.71 | 87.63 | TRUE | 696,005   | 778  | 736  | 80  | NCBI assembly | MAG     | natural       | NA     |
| GCA_002413835.1_ASM241383v1                         | CNA0069977 | 100   | 0    | 52.10 | 88.82 | TRUE | 1,186,207 | 1238 | 1195 | 26  | NCBI assembly | MAG     | natural       | NA     |
| GCA_002413865.1_ASM241386v1                         | CNA0069980 | 95.35 | 0    | 52.80 | 83.56 | TRUE | 1,100,601 | 1121 | 1078 | 58  | NCBI assembly | MAG     | natural       | NA     |
| GCA_002421785.1_ASM242178v1                         | CNA0069983 | 100   | 2.33 | 50.31 | 92.02 | TRUE | 1,042,821 | 1122 | 1079 | 3   | NCBI assembly | MAG     | engineered    | NA     |
| GCA_002421965.1_ASM242196v1                         | CNA0069986 | 95.35 | 0    | 47.17 | 89.86 | TRUE | 704,560   | 759  | 718  | 34  | NCBI assembly | MAG     | engineered    | NA     |
| GCA_002425115.1_ASM242511v1                         | CNA0069989 | 95.35 | 0    | 49.90 | 90.88 | TRUE | 877,521   | 991  | 951  | 31  | NCBI assembly | MAG     | engineered    | NA     |
| GCA_002425145.1_ASM242514v1                         | CNA0069992 | 97.67 | 0    | 51.38 | 90.95 | TRUE | 875,973   | 987  | 945  | 26  | NCBI assembly | MAG     | engineered    | NA     |
| GCA_002427805.1_ASM242780v1                         | CNA0069994 | 95.35 | 0    | 45.81 | 90.32 | TRUE | 848,904   | 935  | 901  | 47  | NCBI assembly | MAG     | natural       | NA     |
| GCA_002429245.1_ASM242924v1                         | CNA0069998 | 97.67 | 0    | 46.50 | 91.81 | TRUE | 865,748   | 942  | 903  | 7   | NCBI assembly | MAG     | natural       | NA     |
| GCA_002433925.1_ASM243392v1                         | CNA0070000 | 97.67 | 0    | 49.90 | 91.55 | TRUE | 881,292   | 996  | 960  | 26  | NCBI assembly | MAG     | engineered    | NA     |
| GCA_002434045.1_ASM243404v1                         | CNA0070003 | 97.67 | 0    | 51.14 | 90.92 | TRUE | 898,580   | 1006 | 956  | 6   | NCBI assembly | MAG     | engineered    | NA     |
| GCA_002434055.1_ASM243405v1                         | CNA0070005 | 97.67 | 0    | 51.31 | 92.27 | TRUE | 823,823   | 935  | 895  | 25  | NCBI assembly | MAG     | engineered    | NA     |
| GCA_002437225.1_ASM243722v1                         | CNA0070008 | 95.35 | 0    | 47.30 | 88.96 | TRUE | 745,520   | 737  | 690  | 52  | NCBI assembly | MAG     | other mammals | NA     |
| GCA_002441145.1_ASM244114v1                         | CNA0070010 | 95.35 | 2.33 | 48.26 | 91.06 | TRUE | 790,334   | 887  | 856  | 32  | NCBI assembly | MAG     | engineered    | NA     |
| GCA_002441585.1_ASM244158v1                         | CNA0070012 | 95.35 | 0    | 52.75 | 91.67 | TRUE | 746,564   | 833  | 798  | 12  | NCBI assembly | MAG     | engineered    | NA     |
| GCA_002452155.1_ASM245215v1                         | CNA0070015 | 100   | 0    | 50.31 | 90.78 | TRUE | 645,305   | 722  | 680  | 13  | NCBI assembly | MAG     | natural       | NA     |
| GCA_002455275.1_ASM245527v1                         | CNA0070017 | 97.67 | 4.65 | 47.12 | 92.25 | TRUE | 934,658   | 1021 | 983  | 9   | NCBI assembly | MAG     | engineered    | NA     |
| GCA_002482925.1_ASM248292v1                         | CNA0070020 | 90.7  | 0    | 41.66 | 88.82 | TRUE | 766,937   | 838  | 805  | 131 | NCBI assembly | MAG     | natural       | NA     |
| GCA_002699225.1_ASM269922v1                         | CNA0070022 | 93.02 | 2.33 | 51.12 | 92.52 | TRUE | 762,552   | 826  | 787  | 25  | NCBI assembly | MAG     | natural       | NA     |
| GCA_002746885.1_ASM274688v1                         | CNA0070025 | 100   | 0    | 50.96 | 88.35 | TRUE | 1,061,088 | 1071 | 1023 | 18  | NCBI assembly | MAG     | other mammals | NA     |
| GCA_002788895.1_ASM278889v1                         | CNA0070027 | 97.67 | 0    | 40.51 | 89.58 | TRUE | 757,435   | 785  | 742  | 63  | NCBI assembly | MAG     | natural       | NA     |
| GCA_002792255.1_ASM279225v1                         | CNA0070030 | 97.67 | 2.33 | 40.54 | 89.44 | TRUE | 763,227   | 786  | 745  | 27  | NCBI assembly | MAG     | natural       | NA     |
| GCA_002792275.1_ASM279227v1                         | CNA0070032 | 93.02 | 0    | 52.43 | 91.09 | TRUE | 783,899   | 877  | 837  | 101 | NCBI assembly | MAG     | natural       | NA     |
| GCA_002793725.1_ASM279372v1                         | CNA0070034 | 95.35 | 2.33 | 40.52 | 89.37 | TRUE | 766,465   | 797  | 756  | 24  | NCBI assembly | MAG     | natural       | NA     |
| GCA_002795915.1_ASM279591v1                         | CNA0070037 | 97.67 | 2.33 | 40.50 | 89.29 | TRUE | 774,948   | 803  | 761  | 20  | NCBI assembly | MAG     | natural       | NA     |
| GCA_002839415.1_ASM283941v1                         | CNA0070039 | 100   | 0    | 39.63 | 89.38 | TRUE | 1,104,520 | 1128 | 1084 | 37  | NCBI assembly | MAG     | natural       | NA     |
| GCA_002952755.1_ASM295275v1                         | CNA0070042 | 97.67 | 0    | 49.95 | 88.93 | TRUE | 1,450,269 | 1573 | 1524 | 1   | NCBI assembly | MAG     | natural       | NA     |
| GCA_003022365.1_ASM302236v1                         | CNA0070044 | 100   | 0    | 53.63 | 83.40 | TRUE | 816,346   | 814  | 766  | 25  | NCBI assembly | MAG     | natural       | NA     |

|                                |            |       |      |       |       |      |           |      |      |     |               |     |               |    |
|--------------------------------|------------|-------|------|-------|-------|------|-----------|------|------|-----|---------------|-----|---------------|----|
| GCA_003133385.1_20120500_P26   | CNA0070046 | 97.67 | 0    | 48.31 | 91.98 | TRUE | 1,091,236 | 1238 | 1199 | 15  | NCBI assembly | MAG | natural       | NA |
| GCA_003153395.1_20120700_P3D   | CNA0070049 | 97.67 | 0    | 40.12 | 91.80 | TRUE | 920,509   | 1004 | 967  | 12  | NCBI assembly | MAG | natural       | NA |
| GCA_003164595.1_20120700_S1D   | CNA0070051 | 97.67 | 0    | 42.74 | 90.35 | TRUE | 868,323   | 946  | 898  | 18  | NCBI assembly | MAG | natural       | NA |
| GCA_003231925.1_ASM323192v1    | CNA0070054 | 93.02 | 0    | 38.13 | 88.03 | TRUE | 748,264   | 802  | 770  | 85  | NCBI assembly | MAG | natural       | NA |
| GCA_003246575.1_ASM324657v1    | CNA0070057 | 100   | 0    | 50.77 | 92.52 | TRUE | 931,448   | 983  | 936  | 4   | NCBI assembly | MAG | natural       | NA |
| GCA_003508055.1_ASM350805v1    | CNA0070059 | 100   | 0    | 46.00 | 90.82 | TRUE | 1,024,319 | 1120 | 1081 | 6   | NCBI assembly | MAG | natural       | NA |
| GCA_003516025.1_ASM351602v1    | CNA0070061 | 100   | 0    | 50.75 | 90.89 | TRUE | 1,005,782 | 1099 | 1052 | 1   | NCBI assembly | MAG | natural       | NA |
| GCA_003523165.1_ASM352316v1    | CNA0070064 | 93.02 | 2.33 | 47.65 | 91.16 | TRUE | 1,045,525 | 1191 | 1164 | 49  | NCBI assembly | MAG | natural       | NA |
| GCA_003537595.1_ASM353759v1    | CNA0070066 | 93.02 | 0    | 50.02 | 90.80 | TRUE | 724,505   | 855  | 820  | 31  | NCBI assembly | MAG | natural       | NA |
| GCA_003962975.1_ASM396297v1    | CNA0070069 | 95.35 | 2.33 | 46.68 | 90.77 | TRUE | 1,211,114 | 1369 | 1320 | 61  | NCBI assembly | MAG | engineered    | NA |
| GCA_003979185.1_ASM397918v1    | CNA0070071 | 97.67 | 0    | 43.72 | 85.85 | TRUE | 875,125   | 862  | 819  | 37  | NCBI assembly | MAG | other mammals | NA |
| GCA_004100265.1_ASM410026v1    | CNA0070074 | 97.67 | 0    | 54.77 | 90.49 | TRUE | 625,066   | 679  | 633  | 57  | NCBI assembly | MAG | natural       | NA |
| GCA_004100325.1_ASM410032v1    | CNA0070076 | 97.67 | 0    | 46.06 | 89.95 | TRUE | 809,903   | 873  | 830  | 6   | NCBI assembly | MAG | natural       | NA |
| GCA_004138395.1_ASM413839v1    | CNA0070084 | 100   | 0    | 43.27 | 91.88 | TRUE | 726,940   | 760  | 712  | 6   | NCBI assembly | MAG | other mammals | NA |
| GCA_004294965.1_ASM429496v1    | CNA0070093 | 90.7  | 0    | 50.33 | 88.59 | TRUE | 1,091,571 | 1210 | 1165 | 15  | NCBI assembly | MAG | engineered    | NA |
| GCA_007120515.1_ASM712051v1    | CNA0070105 | 95.35 | 2.33 | 44.43 | 90.00 | TRUE | 795,542   | 844  | 807  | 65  | NCBI assembly | MAG | natural       | NA |
| GCA_007127855.1_ASM712785v1    | CNA0070108 | 95.35 | 2.33 | 44.57 | 90.11 | TRUE | 801,252   | 861  | 821  | 70  | NCBI assembly | MAG | natural       | NA |
| GCA_007131065.1_ASM713106v1    | CNA0070110 | 95.35 | 0    | 47.16 | 89.38 | TRUE | 540,503   | 579  | 557  | 66  | NCBI assembly | MAG | natural       | NA |
| GCA_007135955.1_ASM713595v1    | CNA0070113 | 95.35 | 2.33 | 44.44 | 90.02 | TRUE | 730,956   | 787  | 755  | 65  | NCBI assembly | MAG | natural       | NA |
| GCA_009691435.1_ASM969143v1    | CNA0070125 | 97.67 | 2.33 | 42.94 | 91.64 | TRUE | 560,001   | 587  | 556  | 38  | NCBI assembly | MAG | natural       | NA |
| GCA_009776375.1_ASM977637v1    | CNA0070127 | 97.67 | 0    | 47.90 | 92.14 | TRUE | 732,928   | 774  | 726  | 32  | NCBI assembly | MAG | insects       | NA |
| GCA_009777315.1_ASM977731v1    | CNA0070130 | 90.7  | 0    | 53.80 | 85.05 | TRUE | 834,365   | 842  | 800  | 30  | NCBI assembly | MAG | insects       | NA |
| GCA_009778675.1_ASM977867v1    | CNA0070132 | 97.67 | 0    | 43.04 | 90.69 | TRUE | 825,230   | 864  | 817  | 39  | NCBI assembly | MAG | insects       | NA |
| GCA_009781895.1_ASM978189v1    | CNA0070135 | 95.35 | 0    | 49.96 | 91.26 | TRUE | 677,865   | 700  | 656  | 14  | NCBI assembly | MAG | insects       | NA |
| GCA_009783235.1_ASM978323v1    | CNA0070137 | 97.67 | 0    | 45.84 | 90.96 | TRUE | 677,568   | 700  | 650  | 6   | NCBI assembly | MAG | insects       | NA |
| GCA_009783305.1_ASM978330v1    | CNA0070140 | 100   | 0    | 47.53 | 92.37 | TRUE | 787,974   | 806  | 755  | 7   | NCBI assembly | MAG | insects       | NA |
| GCA_009785095.1_ASM978509v1    | CNA0070142 | 95.35 | 0    | 50.81 | 91.47 | TRUE | 781,496   | 816  | 766  | 38  | NCBI assembly | MAG | insects       | NA |
| GCA_009787015.1_ASM978701v1    | CNA0070144 | 97.67 | 0    | 47.53 | 90.15 | TRUE | 857,924   | 850  | 803  | 51  | NCBI assembly | MAG | insects       | NA |
| GCA_009787245.1_ASM978724v1    | CNA0070147 | 97.67 | 0    | 47.45 | 89.95 | TRUE | 835,037   | 828  | 780  | 49  | NCBI assembly | MAG | insects       | NA |
| GCA_009992235.1_ASM999223v1    | CNA0070149 | 97.67 | 0    | 47.98 | 92.69 | TRUE | 691,177   | 732  | 695  | 6   | NCBI assembly | MAG | natural       | NA |
| GCA_009994745.1_ASM999474v1    | CNA0070151 | 90.7  | 4.65 | 40.43 | 87.92 | TRUE | 761,642   | 764  | 722  | 137 | NCBI assembly | MAG | natural       | NA |
| GCA_010014515.1_ASM1001451v1   | CNA0070154 | 97.67 | 2.33 | 45.15 | 90.90 | TRUE | 1,210,671 | 1231 | 1180 | 111 | NCBI assembly | MAG | engineered    | NA |
| GCA_010014525.1_ASM1001452v1   | CNA0070156 | 100   | 0    | 42.05 | 89.59 | TRUE | 693,413   | 702  | 661  | 87  | NCBI assembly | MAG | engineered    | NA |
| GCA_012965045.1_ASM1296504v1   | CNA0070172 | 97.67 | 0    | 43.27 | 90.92 | TRUE | 909,550   | 956  | 920  | 3   | NCBI assembly | MAG | natural       | NA |
| GCA_013289705.1_ASM1328970v1   | CNA0070193 | 97.67 | 0    | 47.97 | 90.14 | TRUE | 1,238,311 | 1391 | 1345 | 13  | NCBI assembly | MAG | natural       | NA |
| GCA_013316035.1_ASM1331603v1   | CNA0070197 | 95.35 | 0    | 43.67 | 85.49 | TRUE | 884,000   | 867  | 821  | 40  | NCBI assembly | MAG | other mammals | NA |
| GCA_013316435.1_ASM1331643v1   | CNA0070200 | 90.7  | 0    | 45.12 | 88.30 | TRUE | 692,579   | 708  | 662  | 73  | NCBI assembly | MAG | other mammals | NA |
| GCA_013334475.1_ASM1333447v1   | CNA0070249 | 97.67 | 0    | 43.19 | 89.55 | TRUE | 700,793   | 724  | 677  | 75  | NCBI assembly | MAG | engineered    | NA |
| GCA_013694995.1_ASM1369499v1   | CNA0070254 | 97.67 | 0    | 44.60 | 89.66 | TRUE | 765,679   | 850  | 811  | 7   | NCBI assembly | MAG | natural       | NA |
| GCA_013815775.1_ASM1381577v1   | CNA0070257 | 95.35 | 0    | 44.57 | 90.22 | TRUE | 747,099   | 820  | 773  | 4   | NCBI assembly | MAG | natural       | NA |
| GCA_013815785.1_ASM1381578v1   | CNA0070259 | 93.02 | 0    | 44.44 | 90.45 | TRUE | 816,367   | 908  | 865  | 58  | NCBI assembly | MAG | natural       | NA |
| GCA_013816445.1_ASM1381644v1   | CNA0070262 | 100   | 2.33 | 40.17 | 89.40 | TRUE | 870,466   | 986  | 941  | 134 | NCBI assembly | MAG | natural       | NA |
| GCA_014191035.1_ASM1419103v1   | CNA0070264 | 95.35 | 0    | 39.21 | 92.02 | TRUE | 684,728   | 757  | 713  | 19  | NCBI assembly | MAG | natural       | NA |
| GCA_014377345.1_ASM1437734v1   | CNA0070266 | 97.67 | 0    | 47.45 | 91.47 | TRUE | 709,634   | 797  | 760  | 26  | NCBI assembly | MAG | natural       | NA |
| GCA_014377525.1_ASM1437752v1   | CNA0070268 | 97.67 | 0    | 47.17 | 88.19 | TRUE | 890,971   | 949  | 917  | 40  | NCBI assembly | MAG | natural       | NA |
| GCA_014377695.1_ASM1437769v1   | CNA0070270 | 90.7  | 0    | 48.49 | 89.25 | TRUE | 819,554   | 919  | 885  | 36  | NCBI assembly | MAG | natural       | NA |
| GCA_015655045.1_ASM1565504v1   | CNA0070296 | 97.67 | 0    | 46.59 | 90.63 | TRUE | 848,230   | 935  | 892  | 8   | NCBI assembly | MAG | natural       | NA |
| GCA_015663315.1_ASM1566331v1   | CNA0070298 | 97.67 | 0    | 43.23 | 90.68 | TRUE | 908,873   | 958  | 919  | 10  | NCBI assembly | MAG | natural       | NA |
| GCA_015999845.1_ASM1599984v1   | CNA0070300 | 100   | 0    | 45.94 | 89.90 | TRUE | 1,064,253 | 1146 | 1100 | 3   | NCBI assembly | MAG | engineered    | NA |
| GCA_015999865.1_ASM1599986v1   | CNA0070302 | 100   | 0    | 45.94 | 89.82 | TRUE | 1,064,605 | 1146 | 1100 | 3   | NCBI assembly | MAG | engineered    | NA |
| GCA_015999875.1_ASM1599987v1   | CNA0070305 | 100   | 0    | 47.31 | 91.65 | TRUE | 1,039,764 | 1124 | 1083 | 5   | NCBI assembly | MAG | engineered    | NA |
| GCA_016000075.1_ASM1600007v1   | CNA0070307 | 100   | 0    | 45.93 | 89.90 | TRUE | 1,058,758 | 1140 | 1099 | 6   | NCBI assembly | MAG | engineered    | NA |
| GCA_016000245.1_ASM1600024v1   | CNA0070309 | 95.35 | 2.33 | 47.44 | 91.48 | TRUE | 950,873   | 1007 | 973  | 71  | NCBI assembly | MAG | engineered    | NA |
| GCA_016176605.1_ASM1617660v1   | CNA0070313 | 97.67 | 0    | 47.37 | 87.35 | TRUE | 728,033   | 838  | 797  | 8   | NCBI assembly | MAG | natural       | NA |
| GCA_016178135.1_ASM1617813v1   | CNA0070315 | 97.67 | 0    | 43.02 | 87.38 | TRUE | 799,899   | 893  | 850  | 14  | NCBI assembly | MAG | natural       | NA |
| GCA_016183515.1_ASM1618351v1   | CNA0070316 | 90.7  | 0    | 49.33 | 91.72 | TRUE | 566,607   | 649  | 613  | 80  | NCBI assembly | MAG | natural       | NA |
| GCA_016187125.1_ASM1618712v1   | CNA0070318 | 95.35 | 0    | 46.14 | 86.71 | TRUE | 828,455   | 918  | 872  | 10  | NCBI assembly | MAG | natural       | NA |
| GCA_016187175.1_ASM1618717v1   | CNA0070319 | 95.35 | 2.33 | 47.07 | 89.85 | TRUE | 663,662   | 739  | 704  | 22  | NCBI assembly | MAG | natural       | NA |
| GCA_016191105.1_ASM1619110v1   | CNA0070321 | 97.67 | 0    | 47.40 | 88.94 | TRUE | 927,837   | 1086 | 1034 | 10  | NCBI assembly | MAG | natural       | NA |
| GCA_016196105.1_ASM1619610v1   | CNA0070323 | 97.67 | 0    | 43.06 | 87.30 | TRUE | 780,129   | 867  | 825  | 17  | NCBI assembly | MAG | natural       | NA |
| GCA_016196195.1_ASM1619619v1   | CNA0070324 | 90.7  | 0    | 44.94 | 91.50 | TRUE | 586,813   | 655  | 623  | 41  | NCBI assembly | MAG | natural       | NA |
| GCA_016219345.1_ASM1621934v1   | CNA0070326 | 90.7  | 0    | 41.86 | 93.02 | TRUE | 734,814   | 816  | 784  | 38  | NCBI assembly | MAG | natural       | NA |
| GCA_016234585.1_ASM1623458v1   | CNA0070327 | 90.7  | 0    | 48.52 | 91.80 | TRUE | 545,778   | 562  | 545  | 35  | NCBI assembly | MAG | natural       | NA |
| GCA_016280905.1_ASM1628090v1   | CNA0070329 | 100   | 2.33 | 39.90 | 92.73 | TRUE | 651,831   | 690  | 639  | 18  | NCBI assembly | MAG | other mammals | NA |
| GCA_016283505.1_ASM1628350v1   | CNA0070330 | 95.35 | 0    | 44.87 | 91.49 | TRUE | 1,019,414 | 1033 | 980  | 37  | NCBI assembly | MAG | other mammals | NA |
| GCA_016286785.1_ASM1628678v1   | CNA0070332 | 100   | 0    | 41.05 | 91.21 | TRUE | 766,527   | 766  | 718  | 25  | NCBI assembly | MAG | other mammals | NA |
| GCA_016432585.1_ASM1643258v1   | CNA0070333 | 100   | 2.33 | 48.11 | 91.69 | TRUE | 952,604   | 1047 | 1003 | 1   | NCBI assembly | MAG | natural       | NA |
| GCA_016699065.1_ASM1669906v1   | CNA0070335 | 97.67 | 0    | 48.72 | 87.71 | TRUE | 979,137   | 1217 | 1167 | 1   | NCBI assembly | MAG | engineered    | NA |
| GCA_016699895.1_ASM1669989v1   | CNA0070336 | 97.67 | 0    | 48.41 | 91.34 | TRUE | 749,073   | 808  | 759  | 1   | NCBI assembly | MAG | engineered    | NA |
| GCA_016699935.1_ASM1669993v1   | CNA0070338 | 90.7  | 0    | 48.21 | 80.85 | TRUE | 1,226,308 | 1759 | 1715 | 1   | NCBI assembly | MAG | engineered    | NA |
| GCA_016699955.1_ASM1669995v1   | CNA0070339 | 100   | 0    | 47.81 | 87.85 | TRUE | 1,211,496 | 1296 | 1247 | 1   | NCBI assembly | MAG | engineered    | NA |
| GCA_016700015.1_ASM1670001v1   | CNA0070341 | 100   | 2.33 | 49.37 | 91.11 | TRUE | 1,011,181 | 1108 | 1060 | 1   | NCBI assembly | MAG | engineered    | NA |
| GCA_016700315.1_ASM1670031v1   | CNA0070342 | 97.67 | 0    | 44.81 | 88.04 | TRUE | 988,272   | 1063 | 1019 | 1   | NCBI assembly | MAG | engineered    | NA |
| GCA_016700355.1_ASM1670035v1   | CNA0070344 | 100   | 0    | 48.57 | 91.09 | TRUE | 1,006,672 | 1110 | 1062 | 1   | NCBI assembly | MAG | engineered    | NA |
| GCA_016700375.1_ASM1670037v1   | CNA0070346 | 100   | 0    | 49.69 | 88.72 | TRUE | 1,256,494 | 1334 | 1289 | 1   | NCBI assembly | MAG | engineered    | NA |
| GCA_016700395.1_ASM1670039v1   | CNA0070347 | 100   | 0    | 49.00 | 91.24 | TRUE | 936,132   | 1035 | 988  | 1   | NCBI assembly | MAG | engineered    | NA |
| GCA_016789455.1_ASM1678945v1   | CNA0070349 | 97.67 | 0    | 57.94 | 88.39 | TRUE | 1,437,857 | 1570 | 1523 | 2   | NCBI assembly | MAG | engineered    | NA |
| GCA_016789655.1_ASM1678965v1   | CNA0070350 | 95.35 | 0    | 48.54 | 86.79 | TRUE | 1,349,103 | 1381 | 1339 | 118 | NCBI assembly | MAG | engineered    | NA |
| GCA_016866755.1_JGI_2017-08-21 | CNA0070352 | 100   | 0    | 45.19 | 91.18 | TRUE | 848,146   | 916  | 872  | 7   | NCBI assembly | MAG | natural       | NA |
| GCA_017307155.1_ASM1730715v1   | CNA0070353 | 97.67 | 0    | 46.56 | 91.28 | TRUE | 938,312   | 995  | 951  | 1   | NCBI assembly | MAG | engineered    | NA |
| GCA_017403895.1_ASM1740389v1   | CNA0070355 | 90.7  | 2.33 | 47.13 | 93.59 | TRUE | 630,404   | 641  | 603  | 31  | NCBI assembly | MAG | other mammals | NA |



|                              |            |       |      |       |       |      |           |      |      |     |               |     |               |    |
|------------------------------|------------|-------|------|-------|-------|------|-----------|------|------|-----|---------------|-----|---------------|----|
| GCA_017404285.1_ASM1740428v1 | CNA0070356 | 95.35 | 2.33 | 40.30 | 91.95 | TRUE | 651,873   | 668  | 628  | 40  | NCBI assembly | MAG | other mammals | NA |
| GCA_017404325.1_ASM1740432v1 | CNA0070358 | 100   | 0    | 39.73 | 93.89 | TRUE | 765,999   | 775  | 726  | 17  | NCBI assembly | MAG | other mammals | NA |
| GCA_017404335.1_ASM1740433v1 | CNA0070360 | 100   | 0    | 44.98 | 92.24 | TRUE | 685,718   | 704  | 657  | 6   | NCBI assembly | MAG | other mammals | NA |
| GCA_017404485.1_ASM1740448v1 | CNA0070361 | 100   | 2.33 | 40.50 | 93.94 | TRUE | 725,861   | 742  | 693  | 16  | NCBI assembly | MAG | other mammals | NA |
| GCA_017404515.1_ASM1740451v1 | CNA0070363 | 95.35 | 0    | 42.45 | 89.48 | TRUE | 763,366   | 768  | 724  | 29  | NCBI assembly | MAG | other mammals | NA |
| GCA_017404685.1_ASM1740468v1 | CNA0070364 | 100   | 0    | 47.93 | 90.31 | TRUE | 670,103   | 662  | 618  | 37  | NCBI assembly | MAG | other mammals | NA |
| GCA_017404725.1_ASM1740472v1 | CNA0070366 | 97.67 | 0    | 47.89 | 91.74 | TRUE | 738,871   | 773  | 726  | 32  | NCBI assembly | MAG | other mammals | NA |
| GCA_017404795.1_ASM1740479v1 | CNA0070367 | 100   | 0    | 45.62 | 90.48 | TRUE | 691,946   | 689  | 645  | 27  | NCBI assembly | MAG | other mammals | NA |
| GCA_017404845.1_ASM1740484v1 | CNA0070369 | 95.35 | 2.33 | 51.41 | 91.59 | TRUE | 808,888   | 793  | 749  | 25  | NCBI assembly | MAG | other mammals | NA |
| GCA_017404935.1_ASM1740493v1 | CNA0070371 | 100   | 2.33 | 40.94 | 91.53 | TRUE | 740,059   | 773  | 725  | 11  | NCBI assembly | MAG | other mammals | NA |
| GCA_017404955.1_ASM1740495v1 | CNA0070372 | 97.67 | 0    | 41.42 | 90.47 | TRUE | 718,159   | 722  | 677  | 13  | NCBI assembly | MAG | other mammals | NA |
| GCA_017405225.1_ASM1740522v1 | CNA0070374 | 90.7  | 0    | 40.02 | 89.24 | TRUE | 643,622   | 642  | 602  | 46  | NCBI assembly | MAG | other mammals | NA |
| GCA_017406405.1_ASM1740640v1 | CNA0070375 | 97.67 | 2.33 | 45.63 | 92.03 | TRUE | 697,629   | 713  | 664  | 20  | NCBI assembly | MAG | other mammals | NA |
| GCA_017406565.1_ASM1740656v1 | CNA0070377 | 100   | 0    | 39.59 | 92.64 | TRUE | 815,352   | 809  | 760  | 7   | NCBI assembly | MAG | other mammals | NA |
| GCA_017406595.1_ASM1740659v1 | CNA0070379 | 97.67 | 0    | 43.28 | 92.17 | TRUE | 669,071   | 685  | 640  | 13  | NCBI assembly | MAG | other mammals | NA |
| GCA_017406775.1_ASM1740677v1 | CNA0070380 | 100   | 0    | 40.84 | 91.94 | TRUE | 720,418   | 734  | 687  | 14  | NCBI assembly | MAG | other mammals | NA |
| GCA_017406905.1_ASM1740690v1 | CNA0070381 | 100   | 2.33 | 44.49 | 92.09 | TRUE | 584,732   | 598  | 556  | 13  | NCBI assembly | MAG | other mammals | NA |
| GCA_017406985.1_ASM1740698v1 | CNA0070383 | 97.67 | 0    | 41.96 | 91.72 | TRUE | 731,243   | 738  | 694  | 4   | NCBI assembly | MAG | other mammals | NA |
| GCA_017407085.1_ASM1740708v1 | CNA0070385 | 100   | 4.65 | 47.51 | 92.39 | TRUE | 660,035   | 690  | 644  | 25  | NCBI assembly | MAG | other mammals | NA |
| GCA_017418275.1_ASM1741827v1 | CNA0070386 | 93.02 | 0    | 44.48 | 90.06 | TRUE | 812,642   | 788  | 751  | 38  | NCBI assembly | MAG | other mammals | NA |
| GCA_017420225.1_ASM1742022v1 | CNA0070388 | 97.67 | 0    | 51.21 | 93.19 | TRUE | 556,322   | 582  | 551  | 80  | NCBI assembly | MAG | other mammals | NA |
| GCA_017421325.1_ASM1742132v1 | CNA0070389 | 100   | 2.33 | 42.34 | 89.05 | TRUE | 861,130   | 848  | 801  | 40  | NCBI assembly | MAG | other mammals | NA |
| GCA_017421685.1_ASM1742168v1 | CNA0070391 | 97.67 | 0    | 40.57 | 91.05 | TRUE | 643,773   | 622  | 582  | 70  | NCBI assembly | MAG | other mammals | NA |
| GCA_017430725.1_ASM1743072v1 | CNA0070393 | 100   | 0    | 50.31 | 92.90 | TRUE | 688,696   | 700  | 653  | 10  | NCBI assembly | MAG | other mammals | NA |
| GCA_017430785.1_ASM1743078v1 | CNA0070394 | 95.35 | 0    | 42.40 | 88.56 | TRUE | 826,770   | 826  | 775  | 41  | NCBI assembly | MAG | other mammals | NA |
| GCA_017431085.1_ASM1743108v1 | CNA0070396 | 100   | 2.33 | 48.71 | 89.97 | TRUE | 701,411   | 723  | 674  | 33  | NCBI assembly | MAG | other mammals | NA |
| GCA_017431465.1_ASM1743146v1 | CNA0070397 | 97.67 | 0    | 46.94 | 92.54 | TRUE | 656,372   | 697  | 649  | 32  | NCBI assembly | MAG | other mammals | NA |
| GCA_017431745.1_ASM1743174v1 | CNA0070399 | 97.67 | 0    | 43.76 | 90.99 | TRUE | 744,470   | 746  | 698  | 13  | NCBI assembly | MAG | other mammals | NA |
| GCA_017431945.1_ASM1743194v1 | CNA0070400 | 100   | 0    | 44.66 | 89.81 | TRUE | 728,038   | 753  | 707  | 27  | NCBI assembly | MAG | other mammals | NA |
| GCA_017431955.1_ASM1743195v1 | CNA0070402 | 100   | 0    | 42.08 | 91.79 | TRUE | 712,862   | 738  | 691  | 7   | NCBI assembly | MAG | other mammals | NA |
| GCA_017432025.1_ASM1743202v1 | CNA0070403 | 97.67 | 0    | 43.88 | 94.01 | TRUE | 858,689   | 833  | 786  | 8   | NCBI assembly | MAG | other mammals | NA |
| GCA_017432105.1_ASM1743210v1 | CNA0070405 | 93.02 | 0    | 41.13 | 92.19 | TRUE | 672,881   | 712  | 668  | 37  | NCBI assembly | MAG | other mammals | NA |
| GCA_017432225.1_ASM1743222v1 | CNA0070407 | 100   | 0    | 45.92 | 91.98 | TRUE | 620,715   | 646  | 603  | 18  | NCBI assembly | MAG | other mammals | NA |
| GCA_017432305.1_ASM1743230v1 | CNA0070408 | 97.67 | 0    | 40.80 | 88.87 | TRUE | 747,863   | 757  | 713  | 8   | NCBI assembly | MAG | other mammals | NA |
| GCA_017432365.1_ASM1743236v1 | CNA0070409 | 95.35 | 0    | 50.45 | 92.51 | TRUE | 676,922   | 672  | 626  | 19  | NCBI assembly | MAG | other mammals | NA |
| GCA_017432425.1_ASM1743242v1 | CNA0070410 | 95.35 | 0    | 45.25 | 92.24 | TRUE | 711,736   | 714  | 667  | 30  | NCBI assembly | MAG | other mammals | NA |
| GCA_017432505.1_ASM1743250v1 | CNA0070411 | 95.35 | 0    | 44.75 | 92.07 | TRUE | 629,170   | 655  | 617  | 26  | NCBI assembly | MAG | other mammals | NA |
| GCA_017432705.1_ASM1743270v1 | CNA0070412 | 95.35 | 0    | 43.38 | 90.52 | TRUE | 686,777   | 695  | 656  | 37  | NCBI assembly | MAG | other mammals | NA |
| GCA_017433185.1_ASM1743318v1 | CNA0070413 | 100   | 2.33 | 41.58 | 91.45 | TRUE | 736,037   | 783  | 729  | 14  | NCBI assembly | MAG | other mammals | NA |
| GCA_017433845.1_ASM1743384v1 | CNA0070414 | 90.7  | 0    | 45.37 | 92.73 | TRUE | 583,164   | 613  | 572  | 24  | NCBI assembly | MAG | other mammals | NA |
| GCA_017433855.1_ASM1743385v1 | CNA0070415 | 97.67 | 2.33 | 44.97 | 92.52 | TRUE | 596,208   | 625  | 582  | 11  | NCBI assembly | MAG | other mammals | NA |
| GCA_017434485.1_ASM1743448v1 | CNA0070416 | 97.67 | 2.33 | 45.49 | 92.84 | TRUE | 695,001   | 700  | 653  | 49  | NCBI assembly | MAG | other mammals | NA |
| GCA_017437945.1_ASM1743794v1 | CNA0070417 | 97.67 | 0    | 45.45 | 91.97 | TRUE | 952,266   | 961  | 914  | 14  | NCBI assembly | MAG | other mammals | NA |
| GCA_017447485.1_ASM1744748v1 | CNA0070418 | 97.67 | 0    | 46.02 | 93.94 | TRUE | 612,171   | 644  | 601  | 24  | NCBI assembly | MAG | other mammals | NA |
| GCA_017457925.1_ASM1745792v1 | CNA0070419 | 100   | 0    | 43.24 | 89.12 | TRUE | 1,065,641 | 1110 | 1061 | 19  | NCBI assembly | MAG | other mammals | NA |
| GCA_017459705.1_ASM1745970v1 | CNA0070420 | 100   | 0    | 48.00 | 90.95 | TRUE | 728,099   | 739  | 691  | 10  | NCBI assembly | MAG | other mammals | NA |
| GCA_017459765.1_ASM1745976v1 | CNA0070421 | 97.67 | 2.33 | 46.04 | 92.36 | TRUE | 566,450   | 588  | 546  | 26  | NCBI assembly | MAG | other mammals | NA |
| GCA_017459845.1_ASM1745984v1 | CNA0070422 | 95.35 | 0    | 44.75 | 89.73 | TRUE | 737,231   | 705  | 659  | 41  | NCBI assembly | MAG | other mammals | NA |
| GCA_017460065.1_ASM1746006v1 | CNA0070423 | 95.35 | 0    | 49.39 | 91.41 | TRUE | 652,520   | 660  | 616  | 9   | NCBI assembly | MAG | other mammals | NA |
| GCA_017460105.1_ASM1746010v1 | CNA0070425 | 97.67 | 0    | 44.28 | 91.39 | TRUE | 649,201   | 642  | 609  | 13  | NCBI assembly | MAG | other mammals | NA |
| GCA_017460165.1_ASM1746016v1 | CNA0070426 | 95.35 | 0    | 47.70 | 88.90 | TRUE | 667,669   | 678  | 632  | 112 | NCBI assembly | MAG | other mammals | NA |
| GCA_017460225.1_ASM1746022v1 | CNA0070428 | 93.02 | 0    | 52.63 | 93.11 | TRUE | 694,526   | 688  | 647  | 20  | NCBI assembly | MAG | other mammals | NA |
| GCA_017460305.1_ASM1746030v1 | CNA0070429 | 95.35 | 2.33 | 49.89 | 90.12 | TRUE | 711,234   | 705  | 663  | 75  | NCBI assembly | MAG | other mammals | NA |
| GCA_017460625.1_ASM1746062v1 | CNA0070431 | 93.02 | 0    | 40.87 | 92.18 | TRUE | 711,783   | 732  | 686  | 14  | NCBI assembly | MAG | other mammals | NA |
| GCA_017480035.1_ASM1748003v1 | CNA0070432 | 97.67 | 0    | 43.03 | 91.92 | TRUE | 772,806   | 803  | 756  | 3   | NCBI assembly | MAG | other mammals | NA |
| GCA_017480095.1_ASM1748009v1 | CNA0070434 | 97.67 | 2.33 | 46.22 | 90.95 | TRUE | 813,411   | 796  | 749  | 8   | NCBI assembly | MAG | other mammals | NA |
| GCA_017482785.1_ASM1748278v1 | CNA0070435 | 97.67 | 0    | 46.73 | 90.77 | TRUE | 818,900   | 823  | 773  | 16  | NCBI assembly | MAG | other mammals | NA |
| GCA_017506895.1_ASM1750689v1 | CNA0070437 | 97.67 | 2.33 | 39.12 | 92.05 | TRUE | 714,826   | 691  | 645  | 12  | NCBI assembly | MAG | other mammals | NA |
| GCA_017509895.1_ASM1750989v1 | CNA0070438 | 97.67 | 0    | 45.43 | 89.27 | TRUE | 723,673   | 705  | 661  | 41  | NCBI assembly | MAG | other mammals | NA |
| GCA_017510025.1_ASM1751002v1 | CNA0070440 | 90.7  | 0    | 45.83 | 90.16 | TRUE | 722,747   | 683  | 638  | 36  | NCBI assembly | MAG | other mammals | NA |
| GCA_017510075.1_ASM1751007v1 | CNA0070441 | 95.35 | 2.33 | 47.80 | 89.49 | TRUE | 667,633   | 688  | 624  | 32  | NCBI assembly | MAG | other mammals | NA |
| GCA_017510205.1_ASM1751020v1 | CNA0070443 | 93.02 | 4.65 | 47.64 | 89.78 | TRUE | 542,701   | 521  | 488  | 21  | NCBI assembly | MAG | other mammals | NA |
| GCA_017510385.1_ASM1751038v1 | CNA0070445 | 100   | 0    | 44.49 | 92.45 | TRUE | 853,188   | 862  | 817  | 23  | NCBI assembly | MAG | other mammals | NA |
| GCA_017510425.1_ASM1751042v1 | CNA0070446 | 100   | 0    | 43.66 | 90.48 | TRUE | 840,325   | 801  | 756  | 30  | NCBI assembly | MAG | other mammals | NA |
| GCA_017510445.1_ASM1751044v1 | CNA0070448 | 97.67 | 0    | 40.11 | 90.72 | TRUE | 857,678   | 859  | 812  | 19  | NCBI assembly | MAG | other mammals | NA |
| GCA_017510665.1_ASM1751066v1 | CNA0070449 | 90.7  | 4.65 | 39.36 | 92.78 | TRUE | 735,261   | 717  | 670  | 10  | NCBI assembly | MAG | other mammals | NA |
| GCA_017510705.1_ASM1751070v1 | CNA0070451 | 100   | 0    | 41.89 | 92.13 | TRUE | 657,694   | 682  | 641  | 19  | NCBI assembly | MAG | other mammals | NA |
| GCA_017510845.1_ASM1751084v1 | CNA0070452 | 97.67 | 2.33 | 41.80 | 88.80 | TRUE | 748,211   | 779  | 734  | 41  | NCBI assembly | MAG | other mammals | NA |
| GCA_017510905.1_ASM1751090v1 | CNA0070454 | 93.02 | 2.33 | 40.83 | 91.81 | TRUE | 641,610   | 657  | 616  | 11  | NCBI assembly | MAG | other mammals | NA |
| GCA_017510925.1_ASM1751092v1 | CNA0070455 | 97.67 | 0    | 40.38 | 94.26 | TRUE | 661,755   | 686  | 640  | 9   | NCBI assembly | MAG | other mammals | NA |
| GCA_017511205.1_ASM1751120v1 | CNA0070457 | 100   | 0    | 41.30 | 91.36 | TRUE | 796,006   | 792  | 747  | 12  | NCBI assembly | MAG | other mammals | NA |
| GCA_017511645.1_ASM1751164v1 | CNA0070458 | 97.67 | 0    | 43.28 | 92.73 | TRUE | 523,738   | 560  | 528  | 9   | NCBI assembly | MAG | other mammals | NA |
| GCA_017511845.1_ASM1751184v1 | CNA0070460 | 100   | 4.65 | 40.70 | 91.97 | TRUE | 729,190   | 754  | 706  | 13  | NCBI assembly | MAG | other mammals | NA |
| GCA_017511925.1_ASM1751192v1 | CNA0070462 | 100   | 0    | 41.30 | 91.97 | TRUE | 832,473   | 878  | 829  | 24  | NCBI assembly | MAG | other mammals | NA |
| GCA_017511965.1_ASM1751196v1 | CNA0070463 | 97.67 | 0    | 41.71 | 92.55 | TRUE | 695,404   | 726  | 682  | 39  | NCBI assembly | MAG | other mammals | NA |
| GCA_017512045.1_ASM1751204v1 | CNA0070465 | 95.35 | 0    | 41.93 | 88.99 | TRUE | 732,739   | 753  | 706  | 30  | NCBI assembly | MAG | other mammals | NA |
| GCA_017512085.1_ASM1751208v1 | CNA0070466 | 93.02 | 0    | 43.63 | 87.92 | TRUE | 696,564   | 641  | 603  | 42  | NCBI assembly | MAG | other mammals | NA |
| GCA_017512095.1_ASM1751209v1 | CNA0070468 | 93.02 | 0    | 48.35 | 92.28 | TRUE | 624,889   | 617  | 583  | 8   | NCBI assembly | MAG | other mammals | NA |
| GCA_017512225.1_ASM1751222v1 | CNA0070469 | 93.02 | 0    | 47.87 | 90.46 | TRUE | 459,621   | 442  | 428  | 22  | NCBI assembly | MAG | other mammals | NA |
| GCA_017512925.1_ASM1751292v1 | CNA0070471 | 95.35 | 0    | 43.78 | 92.91 | TRUE | 577,424   | 610  | 569  | 3   | NCBI assembly | MAG | other mammals | NA |
| GCA_017513905.1_ASM1751390v1 | CNA0070473 | 95.35 | 0    | 43.34 | 91.46 | TRUE | 919,513   | 886  | 839  | 23  | NCBI assembly | MAG | other mammals | NA |

|                              |            |       |      |       |       |      |           |      |      |     |               |     |               |    |
|------------------------------|------------|-------|------|-------|-------|------|-----------|------|------|-----|---------------|-----|---------------|----|
| GCA_017514025.1_ASM1751402v1 | CNA0070474 | 100   | 0    | 46.75 | 92.86 | TRUE | 678,996   | 705  | 658  | 7   | NCBI assembly | MAG | other mammals | NA |
| GCA_017514045.1_ASM1751404v1 | CNA0070476 | 95.35 | 2.33 | 43.85 | 91.15 | TRUE | 845,473   | 841  | 792  | 24  | NCBI assembly | MAG | other mammals | NA |
| GCA_017514145.1_ASM1751414v1 | CNA0070477 | 97.67 | 2.33 | 45.81 | 90.91 | TRUE | 662,779   | 669  | 627  | 17  | NCBI assembly | MAG | other mammals | NA |
| GCA_017514665.1_ASM1751466v1 | CNA0070479 | 100   | 0    | 42.68 | 93.02 | TRUE | 670,673   | 664  | 617  | 10  | NCBI assembly | MAG | other mammals | NA |
| GCA_017514675.1_ASM1751467v1 | CNA0070481 | 100   | 0    | 44.31 | 91.34 | TRUE | 632,414   | 649  | 608  | 30  | NCBI assembly | MAG | other mammals | NA |
| GCA_017514805.1_ASM1751480v1 | CNA0070482 | 100   | 0    | 44.48 | 92.21 | TRUE | 880,861   | 878  | 833  | 11  | NCBI assembly | MAG | other mammals | NA |
| GCA_017514865.1_ASM1751486v1 | CNA0070483 | 95.35 | 4.65 | 40.07 | 90.83 | TRUE | 857,392   | 857  | 807  | 40  | NCBI assembly | MAG | other mammals | NA |
| GCA_017515105.1_ASM1751510v1 | CNA0070485 | 95.35 | 0    | 43.60 | 91.59 | TRUE | 811,401   | 798  | 751  | 4   | NCBI assembly | MAG | other mammals | NA |
| GCA_017515205.1_ASM1751520v1 | CNA0070486 | 97.67 | 0    | 40.56 | 92.27 | TRUE | 650,314   | 668  | 621  | 9   | NCBI assembly | MAG | other mammals | NA |
| GCA_017515265.1_ASM1751526v1 | CNA0070488 | 93.02 | 0    | 47.37 | 87.51 | TRUE | 616,809   | 583  | 549  | 23  | NCBI assembly | MAG | other mammals | NA |
| GCA_017515285.1_ASM1751528v1 | CNA0070489 | 95.35 | 0    | 49.97 | 90.83 | TRUE | 849,837   | 884  | 840  | 20  | NCBI assembly | MAG | other mammals | NA |
| GCA_017515785.1_ASM1751578v1 | CNA0070491 | 97.67 | 2.33 | 43.74 | 92.86 | TRUE | 699,925   | 716  | 675  | 14  | NCBI assembly | MAG | other mammals | NA |
| GCA_017516075.1_ASM1751607v1 | CNA0070493 | 90.7  | 0    | 42.96 | 90.98 | TRUE | 923,922   | 874  | 827  | 37  | NCBI assembly | MAG | other mammals | NA |
| GCA_017524405.1_ASM1752440v1 | CNA0070494 | 100   | 0    | 48.99 | 92.17 | TRUE | 897,996   | 903  | 856  | 18  | NCBI assembly | MAG | other mammals | NA |
| GCA_017531585.1_ASM1753158v1 | CNA0070496 | 100   | 0    | 44.01 | 90.02 | TRUE | 1,014,252 | 977  | 929  | 6   | NCBI assembly | MAG | other mammals | NA |
| GCA_017533605.1_ASM1753360v1 | CNA0070498 | 97.67 | 0    | 41.39 | 93.77 | TRUE | 593,307   | 620  | 575  | 6   | NCBI assembly | MAG | other mammals | NA |
| GCA_017536895.1_ASM1753689v1 | CNA0070499 | 97.67 | 2.33 | 42.52 | 91.73 | TRUE | 835,944   | 876  | 825  | 17  | NCBI assembly | MAG | other mammals | NA |
| GCA_017537745.1_ASM1753774v1 | CNA0070501 | 97.67 | 0    | 42.72 | 92.93 | TRUE | 838,126   | 795  | 748  | 11  | NCBI assembly | MAG | other mammals | NA |
| GCA_017540725.1_ASM1754072v1 | CNA0070502 | 97.67 | 0    | 48.90 | 92.65 | TRUE | 806,086   | 851  | 807  | 61  | NCBI assembly | MAG | other mammals | NA |
| GCA_017541245.1_ASM1754124v1 | CNA0070503 | 100   | 2.33 | 44.85 | 91.80 | TRUE | 1,006,593 | 1043 | 994  | 9   | NCBI assembly | MAG | other mammals | NA |
| GCA_017545505.1_ASM1754550v1 | CNA0070505 | 97.67 | 0    | 39.25 | 92.75 | TRUE | 707,176   | 715  | 669  | 7   | NCBI assembly | MAG | other mammals | NA |
| GCA_017545525.1_ASM1754552v1 | CNA0070506 | 100   | 0    | 40.20 | 93.08 | TRUE | 720,812   | 714  | 669  | 9   | NCBI assembly | MAG | other mammals | NA |
| GCA_017545595.1_ASM1754559v1 | CNA0070508 | 97.67 | 0    | 45.08 | 89.12 | TRUE | 744,770   | 736  | 690  | 15  | NCBI assembly | MAG | other mammals | NA |
| GCA_017552385.1_ASM1755238v1 | CNA0070510 | 97.67 | 0    | 44.49 | 91.97 | TRUE | 765,848   | 777  | 730  | 13  | NCBI assembly | MAG | other mammals | NA |
| GCA_017556795.1_ASM1755679v1 | CNA0070511 | 97.67 | 0    | 46.27 | 92.49 | TRUE | 674,245   | 694  | 648  | 5   | NCBI assembly | MAG | other mammals | NA |
| GCA_017557805.1_ASM1755780v1 | CNA0070513 | 95.35 | 2.33 | 45.19 | 91.48 | TRUE | 689,879   | 701  | 655  | 58  | NCBI assembly | MAG | other mammals | NA |
| GCA_017557865.1_ASM1755786v1 | CNA0070514 | 95.35 | 0    | 42.51 | 92.91 | TRUE | 694,178   | 748  | 700  | 24  | NCBI assembly | MAG | other mammals | NA |
| GCA_017561575.1_ASM1756157v1 | CNA0070516 | 90.7  | 0    | 42.02 | 92.76 | TRUE | 622,696   | 629  | 588  | 11  | NCBI assembly | MAG | other mammals | NA |
| GCA_017613135.1_ASM1761313v1 | CNA0070518 | 100   | 0    | 43.53 | 93.36 | TRUE | 728,709   | 714  | 667  | 19  | NCBI assembly | MAG | other mammals | NA |
| GCA_017619315.1_ASM1761931v1 | CNA0070519 | 100   | 2.33 | 43.92 | 91.30 | TRUE | 847,604   | 841  | 799  | 11  | NCBI assembly | MAG | other mammals | NA |
| GCA_017651125.1_ASM1765112v1 | CNA0070521 | 93.02 | 4.65 | 43.79 | 90.74 | TRUE | 880,366   | 869  | 818  | 65  | NCBI assembly | MAG | other mammals | NA |
| GCA_017652105.1_ASM1765210v1 | CNA0070522 | 100   | 0    | 42.29 | 93.24 | TRUE | 668,009   | 701  | 654  | 21  | NCBI assembly | MAG | other mammals | NA |
| GCA_017652765.1_ASM1765276v1 | CNA0070524 | 97.67 | 0    | 44.40 | 91.80 | TRUE | 747,887   | 807  | 759  | 21  | NCBI assembly | MAG | other mammals | NA |
| GCA_017941835.1_ASM1794183v1 | CNA0070525 | 90.7  | 2.33 | 44.36 | 92.15 | TRUE | 634,480   | 669  | 630  | 48  | NCBI assembly | MAG | other mammals | NA |
| GCA_017962365.1_ASM1796236v1 | CNA0070527 | 97.67 | 0    | 44.70 | 92.39 | TRUE | 625,240   | 653  | 607  | 6   | NCBI assembly | MAG | other mammals | NA |
| GCA_017983575.1_ASM1798357v1 | CNA0070528 | 90.7  | 2.33 | 47.98 | 91.05 | TRUE | 819,840   | 874  | 843  | 30  | NCBI assembly | MAG | engineered    | NA |
| GCA_017983775.1_ASM1798377v1 | CNA0070530 | 95.35 | 0    | 40.11 | 87.61 | TRUE | 786,922   | 798  | 755  | 46  | NCBI assembly | MAG | engineered    | NA |
| GCA_017991755.1_ASM1799175v1 | CNA0070532 | 95.35 | 0    | 41.35 | 90.15 | TRUE | 998,908   | 1039 | 1004 | 28  | NCBI assembly | MAG | engineered    | NA |
| GCA_017992295.1_ASM1799229v1 | CNA0070533 | 97.67 | 0    | 40.68 | 89.73 | TRUE | 691,335   | 727  | 682  | 53  | NCBI assembly | MAG | engineered    | NA |
| GCA_018001155.1_ASM1800115v1 | CNA0070535 | 90.7  | 2.33 | 37.71 | 88.65 | TRUE | 732,972   | 795  | 763  | 90  | NCBI assembly | MAG | engineered    | NA |
| GCA_018058565.1_ASM1805856v1 | CNA0070536 | 95.35 | 0    | 38.27 | 90.41 | TRUE | 632,262   | 682  | 644  | 45  | NCBI assembly | MAG | engineered    | NA |
| GCA_018060465.1_ASM1806046v1 | CNA0070538 | 95.35 | 2.33 | 46.12 | 91.35 | TRUE | 884,716   | 951  | 913  | 63  | NCBI assembly | MAG | engineered    | NA |
| GCA_018062785.1_ASM1806278v1 | CNA0070539 | 100   | 0    | 48.84 | 89.20 | TRUE | 862,455   | 916  | 878  | 23  | NCBI assembly | MAG | engineered    | NA |
| GCA_018062805.1_ASM1806280v1 | CNA0070541 | 95.35 | 0    | 39.67 | 89.86 | TRUE | 694,595   | 752  | 721  | 55  | NCBI assembly | MAG | engineered    | NA |
| GCA_019352195.1_ASM1935219v1 | CNA0070544 | 100   | 0    | 53.02 | 86.47 | TRUE | 1,192,683 | 1412 | 1361 | 12  | NCBI assembly | MAG | natural       | NA |
| GCA_019662065.1_ASM1966206v1 | CNA0070545 | 93.02 | 0    | 48.21 | 91.51 | TRUE | 679,146   | 782  | 741  | 72  | NCBI assembly | MAG | natural       | NA |
| GCA_020427985.1_ASM2042798v1 | CNA0070547 | 97.67 | 0    | 47.97 | 88.56 | TRUE | 978,274   | 1119 | 1077 | 51  | NCBI assembly | MAG | engineered    | NA |
| GCA_020428005.1_ASM2042800v1 | CNA0070548 | 100   | 2.33 | 39.27 | 93.25 | TRUE | 1,045,205 | 1157 | 1115 | 101 | NCBI assembly | MAG | engineered    | NA |
| GCA_020428105.1_ASM2042810v1 | CNA0070549 | 100   | 0    | 44.55 | 90.86 | TRUE | 910,443   | 951  | 917  | 78  | NCBI assembly | MAG | engineered    | NA |
| GCA_020428275.1_ASM2042827v1 | CNA0070551 | 97.67 | 4.65 | 49.67 | 89.18 | TRUE | 919,279   | 1004 | 963  | 45  | NCBI assembly | MAG | engineered    | NA |
| GCA_020428315.1_ASM2042831v1 | CNA0070553 | 97.67 | 4.65 | 41.75 | 91.60 | TRUE | 815,932   | 867  | 830  | 78  | NCBI assembly | MAG | engineered    | NA |
| GCA_020428425.1_ASM2042842v1 | CNA0070554 | 93.02 | 0    | 39.46 | 91.25 | TRUE | 772,924   | 771  | 745  | 101 | NCBI assembly | MAG | engineered    | NA |
| GCA_020428435.1_ASM2042843v1 | CNA0070556 | 93.02 | 2.33 | 39.50 | 90.95 | TRUE | 841,182   | 909  | 874  | 55  | NCBI assembly | MAG | engineered    | NA |
| GCA_020428475.1_ASM2042847v1 | CNA0070557 | 100   | 0    | 41.43 | 89.66 | TRUE | 833,323   | 888  | 844  | 72  | NCBI assembly | MAG | engineered    | NA |
| GCA_020428525.1_ASM2042852v1 | CNA0070559 | 95.35 | 0    | 44.70 | 90.31 | TRUE | 832,352   | 891  | 844  | 75  | NCBI assembly | MAG | engineered    | NA |
| GCA_021404905.1_ASM2140490v1 | CNA0070563 | 97.67 | 0    | 40.53 | 90.50 | TRUE | 829,375   | 877  | 827  | 9   | NCBI assembly | MAG | engineered    | NA |
| GCA_022736555.1_ASM2273655v1 | CNA0070565 | 95.35 | 0    | 40.98 | 90.17 | TRUE | 692,521   | 741  | 702  | 11  | NCBI assembly | MAG | engineered    | NA |
| GCA_022841445.1_ASM2284144v1 | CNA0070582 | 97.67 | 0    | 46.09 | 91.23 | TRUE | 1,096,381 | 1174 | 1122 | 41  | NCBI assembly | MAG | engineered    | NA |
| GCA_022842995.1_ASM2284299v1 | CNA0070583 | 90.7  | 2.33 | 45.63 | 87.71 | TRUE | 1,111,147 | 1119 | 1077 | 36  | NCBI assembly | MAG | engineered    | NA |
| GCA_023253175.1_ASM2325317v1 | CNA0070585 | 100   | 4.65 | 46.83 | 89.36 | TRUE | 980,690   | 1091 | 1017 | 49  | NCBI assembly | MAG | natural       | NA |
| GCA_023257815.1_ASM2325781v1 | CNA0070586 | 95.35 | 0    | 44.37 | 91.62 | TRUE | 860,263   | 963  | 924  | 42  | NCBI assembly | MAG | natural       | NA |
| GCA_023259925.1_ASM2325992v1 | CNA0070588 | 90.7  | 0    | 45.80 | 92.11 | TRUE | 816,627   | 910  | 872  | 91  | NCBI assembly | MAG | natural       | NA |
| GCA_024635455.1_ASM2463545v1 | CNA0070591 | 95.35 | 0    | 44.94 | 88.86 | TRUE | 840,622   | 891  | 848  | 4   | NCBI assembly | MAG | natural       | NA |
| GCA_024635495.1_ASM2463549v1 | CNA0070593 | 100   | 0    | 47.68 | 90.00 | TRUE | 820,174   | 865  | 820  | 5   | NCBI assembly | MAG | natural       | NA |
| GCA_024682595.1_ASM2468259v1 | CNA0070594 | 97.67 | 2.33 | 43.57 | 89.42 | TRUE | 1,039,115 | 1099 | 1052 | 77  | NCBI assembly | MAG | other mammals | NA |
| GCA_024697865.1_ASM2469786v1 | CNA0070596 | 97.67 | 0    | 43.73 | 92.96 | TRUE | 709,535   | 739  | 692  | 26  | NCBI assembly | MAG | other mammals | NA |
| GCA_024699125.1_ASM2469912v1 | CNA0070597 | 97.67 | 0    | 45.02 | 91.71 | TRUE | 765,546   | 758  | 711  | 13  | NCBI assembly | MAG | other mammals | NA |
| GCA_025449905.1_ASM2544990v1 | CNA0070602 | 95.35 | 0    | 43.78 | 92.97 | TRUE | 632,826   | 754  | 714  | 13  | NCBI assembly | MAG | natural       | NA |
| GCA_025450135.1_ASM2545013v1 | CNA0070603 | 95.35 | 0    | 49.99 | 90.88 | TRUE | 829,123   | 905  | 871  | 58  | NCBI assembly | MAG | natural       | NA |
| GCA_025451045.1_ASM2545104v1 | CNA0070605 | 95.35 | 0    | 45.66 | 91.93 | TRUE | 833,363   | 914  | 867  | 3   | NCBI assembly | MAG | natural       | NA |
| GCA_025924835.1_ASM2592483v1 | CNA0070606 | 93.02 | 0    | 47.26 | 91.59 | TRUE | 1,008,761 | 1141 | 1103 | 51  | NCBI assembly | MAG | natural       | NA |
| GCA_025928155.1_ASM2592815v1 | CNA0070607 | 100   | 0    | 53.32 | 89.24 | TRUE | 1,301,116 | 1480 | 1434 | 33  | NCBI assembly | MAG | natural       | NA |
| GCA_025934715.1_ASM2593471v1 | CNA0070609 | 95.35 | 0    | 52.03 | 90.20 | TRUE | 713,779   | 840  | 794  | 33  | NCBI assembly | MAG | natural       | NA |
| GCA_026395375.1_ASM2639537v1 | CNA0070610 | 95.35 | 0    | 42.20 | 88.87 | TRUE | 717,669   | 780  | 741  | 103 | NCBI assembly | MAG | natural       | NA |
| GCA_026395395.1_ASM2639539v1 | CNA0070612 | 97.67 | 2.33 | 40.46 | 91.36 | TRUE | 781,935   | 871  | 827  | 72  | NCBI assembly | MAG | natural       | NA |
| GCA_026395405.1_ASM2639540v1 | CNA0070613 | 97.67 | 0    | 42.50 | 90.29 | TRUE | 855,423   | 918  | 874  | 8   | NCBI assembly | MAG | natural       | NA |
| GCA_026395435.1_ASM2639543v1 | CNA0070615 | 97.67 | 2.33 | 44.49 | 91.12 | TRUE | 937,984   | 1018 | 981  | 22  | NCBI assembly | MAG | natural       | NA |
| GCA_026706615.1_ASM2670661v1 | CNA0070617 | 95.35 | 0    | 35.87 | 87.46 | TRUE | 639,553   | 642  | 605  | 30  | NCBI assembly | MAG | natural       | NA |
| GCA_026707815.1_ASM2670781v1 | CNA0070618 | 95.35 | 0    | 35.96 | 86.83 | TRUE | 692,050   | 721  | 680  | 9   | NCBI assembly | MAG | natural       | NA |
| GCA_026708245.1_ASM2670824v1 | CNA0070620 | 95.35 | 0    | 35.88 | 86.95 | TRUE | 645,978   | 663  | 622  | 38  | NCBI assembly | MAG | natural       | NA |
| GCA_027311865.1_ASM2731186v1 | CNA0070621 | 95.35 | 0    | 48.98 | 91.99 | TRUE | 639,119   | 703  | 661  | 38  | NCBI assembly | MAG | natural       | NA |



|                                                           |            |       |      |       |       |      |           |      |      |     |               |     |            |    |
|-----------------------------------------------------------|------------|-------|------|-------|-------|------|-----------|------|------|-----|---------------|-----|------------|----|
| GCA_027312225.1_ASM2731222v1                              | CNA0070623 | 100   | 0    | 49.67 | 92.01 | TRUE | 760,352   | 837  | 803  | 33  | NCBI assembly | MAG | natural    | NA |
| GCA_027314885.1_ASM2731488v1                              | CNA0070624 | 95.35 | 0    | 47.03 | 88.74 | TRUE | 928,885   | 1040 | 989  | 83  | NCBI assembly | MAG | natural    | NA |
| GCA_027315225.1_ASM2731522v1                              | CNA0070626 | 97.67 | 0    | 53.26 | 91.32 | TRUE | 970,313   | 1039 | 990  | 69  | NCBI assembly | MAG | natural    | NA |
| GCA_027323755.1_ASM2732375v1                              | CNA0070627 | 100   | 0    | 33.57 | 90.81 | TRUE | 714,053   | 762  | 719  | 9   | NCBI assembly | MAG | engineered | NA |
| GCA_027325955.1_ASM2732595v1                              | CNA0070629 | 97.67 | 0    | 45.08 | 88.41 | TRUE | 845,429   | 924  | 887  | 32  | NCBI assembly | MAG | engineered | NA |
| GCA_027326965.1_ASM2732696v1                              | CNA0070630 | 90.7  | 0    | 31.14 | 92.70 | TRUE | 619,544   | 681  | 649  | 77  | NCBI assembly | MAG | engineered | NA |
| GCA_027327265.1_ASM2732726v1                              | CNA0070632 | 100   | 2.33 | 35.45 | 89.50 | TRUE | 820,830   | 944  | 886  | 51  | NCBI assembly | MAG | engineered | NA |
| GCA_027328705.1_ASM2732870v1                              | CNA0070633 | 95.35 | 2.33 | 43.87 | 90.45 | TRUE | 815,279   | 875  | 830  | 63  | NCBI assembly | MAG | engineered | NA |
| GCA_027331915.1_ASM2733191v1                              | CNA0070634 | 97.67 | 0    | 40.54 | 90.28 | TRUE | 936,265   | 1039 | 994  | 6   | NCBI assembly | MAG | engineered | NA |
| GCA_027331975.1_ASM2733197v1                              | CNA0070636 | 97.67 | 0    | 31.93 | 92.12 | TRUE | 563,357   | 623  | 588  | 31  | NCBI assembly | MAG | engineered | NA |
| GCA_027332225.1_ASM2733222v1                              | CNA0070637 | 95.35 | 0    | 33.98 | 91.25 | TRUE | 670,637   | 749  | 706  | 16  | NCBI assembly | MAG | engineered | NA |
| GCA_027334585.1_ASM2733458v1                              | CNA0070639 | 97.67 | 2.33 | 41.36 | 90.81 | TRUE | 698,408   | 800  | 751  | 24  | NCBI assembly | MAG | engineered | NA |
| GCA_027338765.1_ASM2733876v1                              | CNA0070640 | 95.35 | 0    | 43.39 | 90.41 | TRUE | 722,514   | 798  | 759  | 22  | NCBI assembly | MAG | engineered | NA |
| GCA_027340605.1_ASM2734060v1                              | CNA0070641 | 95.35 | 0    | 37.53 | 92.81 | TRUE | 755,624   | 834  | 791  | 31  | NCBI assembly | MAG | engineered | NA |
| GCA_027340655.1_ASM2734065v1                              | CNA0070643 | 93.02 | 0    | 45.86 | 92.09 | TRUE | 535,067   | 552  | 534  | 36  | NCBI assembly | MAG | engineered | NA |
| GCA_027345405.1_ASM2734540v1                              | CNA0070644 | 93.02 | 0    | 44.03 | 91.49 | TRUE | 619,494   | 677  | 652  | 37  | NCBI assembly | MAG | engineered | NA |
| GCA_027351585.1_ASM2735158v1                              | CNA0070646 | 95.35 | 0    | 43.99 | 87.46 | TRUE | 888,715   | 988  | 943  | 31  | NCBI assembly | MAG | engineered | NA |
| GCA_027356125.1_ASM2735612v1                              | CNA0070647 | 97.67 | 4.65 | 37.62 | 90.74 | TRUE | 752,299   | 837  | 787  | 23  | NCBI assembly | MAG | engineered | NA |
| GCA_027356525.1_ASM2735652v1                              | CNA0070649 | 97.67 | 0    | 47.89 | 85.69 | TRUE | 1,353,170 | 1475 | 1427 | 64  | NCBI assembly | MAG | engineered | NA |
| GCA_027365555.1_ASM2736555v1                              | CNA0070650 | 90.7  | 0    | 46.93 | 90.47 | TRUE | 519,784   | 567  | 541  | 24  | NCBI assembly | MAG | engineered | NA |
| GCA_027365795.1_ASM2736579v1                              | CNA0070652 | 95.35 | 2.33 | 43.88 | 90.49 | TRUE | 831,205   | 913  | 871  | 20  | NCBI assembly | MAG | engineered | NA |
| GCA_027366295.1_ASM2736629v1                              | CNA0070653 | 95.35 | 0    | 42.94 | 87.95 | TRUE | 852,984   | 921  | 870  | 27  | NCBI assembly | MAG | engineered | NA |
| GCA_027366415.1_ASM2736641v1                              | CNA0070655 | 97.67 | 0    | 43.77 | 87.80 | TRUE | 927,956   | 1046 | 995  | 58  | NCBI assembly | MAG | engineered | NA |
| GCA_027426655.1_ASM2742665v1                              | CNA0070656 | 95.35 | 0    | 33.28 | 87.87 | TRUE | 769,039   | 846  | 805  | 99  | NCBI assembly | MAG | engineered | NA |
| GCA_027426675.1_ASM2742667v1                              | CNA0070657 | 90.7  | 0    | 33.19 | 89.35 | TRUE | 741,623   | 798  | 761  | 38  | NCBI assembly | MAG | engineered | NA |
| GCA_027426695.1_ASM2742669v1                              | CNA0070659 | 95.35 | 2.33 | 33.18 | 88.21 | TRUE | 768,694   | 859  | 816  | 50  | NCBI assembly | MAG | engineered | NA |
| GCA_027426775.1_ASM2742677v1                              | CNA0070661 | 95.35 | 0    | 42.98 | 87.41 | TRUE | 845,087   | 903  | 850  | 43  | NCBI assembly | MAG | engineered | NA |
| GCA_027426815.1_ASM2742681v1                              | CNA0070662 | 93.02 | 0    | 42.95 | 87.80 | TRUE | 832,377   | 891  | 841  | 34  | NCBI assembly | MAG | engineered | NA |
| GCA_027426835.1_ASM2742683v1                              | CNA0070664 | 95.35 | 2.33 | 45.01 | 88.27 | TRUE | 979,043   | 1072 | 1029 | 27  | NCBI assembly | MAG | engineered | NA |
| GCA_027426875.1_ASM2742687v1                              | CNA0070665 | 95.35 | 0    | 45.51 | 91.37 | TRUE | 823,237   | 917  | 870  | 31  | NCBI assembly | MAG | engineered | NA |
| GCA_027426915.1_ASM2742691v1                              | CNA0070667 | 93.02 | 4.65 | 36.42 | 86.73 | TRUE | 806,236   | 904  | 857  | 36  | NCBI assembly | MAG | engineered | NA |
| GCA_027426955.1_ASM2742695v1                              | CNA0070669 | 100   | 0    | 35.34 | 90.10 | TRUE | 765,829   | 883  | 834  | 38  | NCBI assembly | MAG | engineered | NA |
| GCA_027426975.1_ASM2742697v1                              | CNA0070670 | 100   | 0    | 35.37 | 89.78 | TRUE | 808,758   | 943  | 895  | 41  | NCBI assembly | MAG | engineered | NA |
| GCA_027426995.1_ASM2742699v1                              | CNA0070672 | 93.02 | 2.33 | 35.19 | 89.36 | TRUE | 773,512   | 875  | 828  | 99  | NCBI assembly | MAG | engineered | NA |
| GCA_027427015.1_ASM2742701v1                              | CNA0070673 | 95.35 | 0    | 33.83 | 88.78 | TRUE | 663,841   | 695  | 653  | 31  | NCBI assembly | MAG | engineered | NA |
| GCA_027427035.1_ASM2742703v1                              | CNA0070675 | 95.35 | 0    | 44.39 | 88.53 | TRUE | 659,737   | 720  | 686  | 18  | NCBI assembly | MAG | engineered | NA |
| GCA_027427055.1_ASM2742705v1                              | CNA0070676 | 90.7  | 0    | 44.34 | 89.26 | TRUE | 680,309   | 721  | 689  | 46  | NCBI assembly | MAG | engineered | NA |
| GCA_027427115.1_ASM2742711v1                              | CNA0070678 | 90.7  | 0    | 40.17 | 89.75 | TRUE | 693,706   | 786  | 740  | 49  | NCBI assembly | MAG | engineered | NA |
| GCA_027427135.1_ASM2742713v1                              | CNA0070679 | 100   | 0    | 34.21 | 90.02 | TRUE | 784,982   | 872  | 826  | 16  | NCBI assembly | MAG | engineered | NA |
| GCA_027427155.1_ASM2742715v1                              | CNA0070681 | 93.02 | 0    | 40.89 | 89.85 | TRUE | 955,328   | 1035 | 991  | 96  | NCBI assembly | MAG | engineered | NA |
| GCA_027427195.1_ASM2742719v1                              | CNA0070682 | 100   | 0    | 36.02 | 90.35 | TRUE | 694,432   | 758  | 710  | 20  | NCBI assembly | MAG | engineered | NA |
| GCA_027427215.1_ASM2742721v1                              | CNA0070683 | 100   | 0    | 34.04 | 90.76 | TRUE | 744,436   | 822  | 777  | 11  | NCBI assembly | MAG | engineered | NA |
| GCA_027427235.1_ASM2742723v1                              | CNA0070685 | 100   | 0    | 35.91 | 91.75 | TRUE | 672,586   | 733  | 685  | 23  | NCBI assembly | MAG | engineered | NA |
| GCA_027427255.1_ASM2742725v1                              | CNA0070686 | 100   | 0    | 35.97 | 91.38 | TRUE | 690,582   | 750  | 707  | 22  | NCBI assembly | MAG | engineered | NA |
| GCA_027427295.1_ASM2742729v1                              | CNA0070688 | 97.67 | 0    | 31.71 | 89.24 | TRUE | 851,130   | 928  | 882  | 30  | NCBI assembly | MAG | engineered | NA |
| GCA_027427395.1_ASM2742739v1                              | CNA0070689 | 90.7  | 0    | 38.04 | 92.61 | TRUE | 702,470   | 783  | 746  | 27  | NCBI assembly | MAG | engineered | NA |
| GCA_027427415.1_ASM2742741v1                              | CNA0070691 | 95.35 | 0    | 37.60 | 92.67 | TRUE | 754,855   | 829  | 785  | 20  | NCBI assembly | MAG | engineered | NA |
| GCA_027427475.1_ASM2742747v1                              | CNA0070692 | 100   | 2.33 | 32.09 | 91.35 | TRUE | 775,138   | 857  | 800  | 43  | NCBI assembly | MAG | engineered | NA |
| GCA_027427495.1_ASM2742749v1                              | CNA0070694 | 100   | 0    | 33.96 | 88.57 | TRUE | 743,105   | 807  | 753  | 39  | NCBI assembly | MAG | engineered | NA |
| GCA_027427515.1_ASM2742751v1                              | CNA0070695 | 100   | 0    | 33.62 | 89.45 | TRUE | 714,058   | 805  | 761  | 31  | NCBI assembly | MAG | engineered | NA |
| GCA_027427535.1_ASM2742753v1                              | CNA0070696 | 100   | 0    | 33.65 | 90.14 | TRUE | 740,880   | 802  | 753  | 26  | NCBI assembly | MAG | engineered | NA |
| GCA_027427555.1_ASM2742755v1                              | CNA0070698 | 100   | 0    | 33.49 | 90.74 | TRUE | 709,158   | 761  | 719  | 10  | NCBI assembly | MAG | engineered | NA |
| GCA_027427575.1_ASM2742757v1                              | CNA0070699 | 100   | 0    | 33.78 | 90.37 | TRUE | 734,709   | 814  | 766  | 28  | NCBI assembly | MAG | engineered | NA |
| GCA_027427595.1_ASM2742759v1                              | CNA0070701 | 100   | 2.33 | 33.68 | 90.12 | TRUE | 751,747   | 817  | 770  | 26  | NCBI assembly | MAG | engineered | NA |
| GCA_027427615.1_ASM2742761v1                              | CNA0070702 | 100   | 0    | 33.70 | 89.71 | TRUE | 686,514   | 734  | 688  | 20  | NCBI assembly | MAG | engineered | NA |
| GCA_027427655.1_ASM2742765v1                              | CNA0070704 | 100   | 0    | 33.53 | 90.81 | TRUE | 693,193   | 750  | 707  | 11  | NCBI assembly | MAG | engineered | NA |
| GCA_027427675.1_ASM2742767v1                              | CNA0070705 | 100   | 0    | 33.69 | 90.24 | TRUE | 715,372   | 775  | 730  | 12  | NCBI assembly | MAG | engineered | NA |
| GCA_027427695.1_ASM2742769v1                              | CNA0070706 | 100   | 0    | 33.84 | 90.27 | TRUE | 770,055   | 832  | 786  | 21  | NCBI assembly | MAG | engineered | NA |
| GCA_027427715.1_ASM2742771v1                              | CNA0070708 | 100   | 0    | 33.79 | 85.82 | TRUE | 763,022   | 843  | 791  | 74  | NCBI assembly | MAG | engineered | NA |
| GCA_027427755.1_ASM2742775v1                              | CNA0070709 | 90.7  | 0    | 31.10 | 92.60 | TRUE | 615,340   | 679  | 639  | 37  | NCBI assembly | MAG | engineered | NA |
| GCA_027427775.1_ASM2742777v1                              | CNA0070711 | 93.02 | 0    | 31.41 | 92.30 | TRUE | 675,694   | 739  | 697  | 24  | NCBI assembly | MAG | engineered | NA |
| GCA_027427795.1_ASM2742779v1                              | CNA0070712 | 95.35 | 0    | 31.50 | 92.54 | TRUE | 633,638   | 701  | 657  | 31  | NCBI assembly | MAG | engineered | NA |
| GCA_027427835.1_ASM2742783v1                              | CNA0070714 | 93.02 | 0    | 31.51 | 92.03 | TRUE | 686,819   | 764  | 721  | 16  | NCBI assembly | MAG | engineered | NA |
| GCA_027427875.1_ASM2742787v1                              | CNA0070715 | 90.7  | 0    | 29.52 | 91.67 | TRUE | 609,017   | 647  | 611  | 125 | NCBI assembly | MAG | engineered | NA |
| GCA_027427915.1_ASM2742791v1                              | CNA0070717 | 93.02 | 0    | 31.34 | 90.22 | TRUE | 742,149   | 827  | 782  | 60  | NCBI assembly | MAG | engineered | NA |
| GCA_027428095.1_ASM2742809v1                              | CNA0070718 | 97.67 | 0    | 50.90 | 89.80 | TRUE | 748,335   | 842  | 781  | 37  | NCBI assembly | MAG | engineered | NA |
| GCA_027446965.1_ASM2744696v1                              | CNA0070720 | 93.02 | 0    | 40.13 | 90.83 | TRUE | 570,833   | 634  | 609  | 44  | NCBI assembly | MAG | engineered | NA |
| GCA_027446985.1_ASM2744698v1                              | CNA0070721 | 97.67 | 0    | 34.54 | 90.82 | TRUE | 714,287   | 794  | 754  | 15  | NCBI assembly | MAG | engineered | NA |
| GCA_027447005.1_ASM2744700v1                              | CNA0070722 | 97.67 | 0    | 31.18 | 89.53 | TRUE | 767,772   | 847  | 808  | 24  | NCBI assembly | MAG | engineered | NA |
| GCA_027449065.1_ASM2744906v1                              | CNA0070724 | 97.67 | 0    | 38.48 | 87.98 | TRUE | 795,439   | 843  | 796  | 21  | NCBI assembly | MAG | engineered | NA |
| GCA_027450065.1_ASM2745006v1                              | CNA0070725 | 90.7  | 0    | 48.80 | 87.47 | TRUE | 907,565   | 978  | 919  | 80  | NCBI assembly | MAG | engineered | NA |
| GCA_027450165.1_ASM2745016v1                              | CNA0070727 | 97.67 | 0    | 49.42 | 92.29 | TRUE | 794,205   | 856  | 808  | 7   | NCBI assembly | MAG | engineered | NA |
| GCA_027459325.1_ASM2745932v1                              | CNA0070728 | 95.35 | 2.33 | 42.68 | 91.17 | TRUE | 822,790   | 939  | 897  | 30  | NCBI assembly | MAG | engineered | NA |
| GCA_027459425.1_ASM2745942v1                              | CNA0070729 | 95.35 | 0    | 36.48 | 92.20 | TRUE | 736,962   | 846  | 802  | 45  | NCBI assembly | MAG | engineered | NA |
| GCA_027492255.1_ASM2749225v1                              | CNA0070731 | 100   | 0    | 45.64 | 90.74 | TRUE | 854,584   | 940  | 897  | 6   | NCBI assembly | MAG | engineered | NA |
| GCA_027492535.1_ASM2749253v1                              | CNA0070732 | 90.7  | 0    | 50.29 | 90.44 | TRUE | 800,468   | 865  | 829  | 107 | NCBI assembly | MAG | engineered | NA |
| GCA_027492635.1_ASM2749263v1                              | CNA0070734 | 100   | 4.65 | 48.79 | 91.56 | TRUE | 1,013,964 | 1081 | 1042 | 35  | NCBI assembly | MAG | engineered | NA |
| GCA_027492735.1_ASM2749273v1                              | CNA0070735 | 97.67 | 4.65 | 46.87 | 91.94 | TRUE | 816,744   | 864  | 818  | 28  | NCBI assembly | MAG | engineered | NA |
| GCA_027492975.1_ASM2749297v1                              | CNA0070736 | 95.35 | 0    | 50.05 | 88.93 | TRUE | 835,225   | 878  | 838  | 53  | NCBI assembly | MAG | engineered | NA |
| GCA_027493025.1_ASM2749302v1                              | CNA0070738 | 93.02 | 4.65 | 45.66 | 91.54 | TRUE | 909,652   | 897  | 864  | 47  | NCBI assembly | MAG | engineered | NA |
| GCA_903821315.1_freshwater_MAG_---_AM-lipid-01-D2_bin-004 | CNA0070748 | 97.67 | 0    | 39.59 | 92.13 | TRUE | 727,869   | 786  | 741  | 13  | NCBI assembly | MAG | natural    | NA |

|                                                            |            |       |      |       |       |      |           |      |      |     |               |     |               |    |
|------------------------------------------------------------|------------|-------|------|-------|-------|------|-----------|------|------|-----|---------------|-----|---------------|----|
| GCA_903828465.1_freshwater_MAG_---_Umea3_bin-2596          | CNA0070749 | 97.67 | 0    | 34.36 | 93.37 | TRUE | 581,176   | 611  | 575  | 65  | NCBI assembly | MAG | natural       | NA |
| GCA_903829335.1_freshwater_MAG_---_AM-lipid-02-D1_bin-0304 | CNA0070751 | 97.67 | 0    | 36.78 | 92.59 | TRUE | 741,305   | 822  | 775  | 17  | NCBI assembly | MAG | natural       | NA |
| GCA_903831735.1_freshwater_MAG_---_AlinenLipids_bin-2074   | CNA0070752 | 97.67 | 0    | 39.55 | 91.88 | TRUE | 720,955   | 778  | 733  | 12  | NCBI assembly | MAG | natural       | NA |
| GCA_903832815.1_freshwater_MAG_---_AM-lipid-01-D1_bin-110  | CNA0070754 | 97.67 | 0    | 39.49 | 92.01 | TRUE | 733,085   | 794  | 749  | 19  | NCBI assembly | MAG | natural       | NA |
| GCA_903836325.1_freshwater_MAG_---_KR2_bin-0178            | CNA0070755 | 100   | 2.33 | 34.38 | 92.83 | TRUE | 634,302   | 672  | 631  | 85  | NCBI assembly | MAG | natural       | NA |
| GCA_903837875.1_freshwater_MAG_---_Umea_bin-00478          | CNA0070757 | 100   | 0    | 34.26 | 93.08 | TRUE | 586,775   | 632  | 594  | 65  | NCBI assembly | MAG | natural       | NA |
| GCA_903839435.1_freshwater_MAG_---_Kiruna_bin-08663        | CNA0070758 | 97.67 | 0    | 37.21 | 92.73 | TRUE | 586,798   | 642  | 604  | 117 | NCBI assembly | MAG | natural       | NA |
| GCA_903840315.1_freshwater_MAG_---_AM-lipid-02-D2_bin-0413 | CNA0070759 | 97.67 | 0    | 36.74 | 92.56 | TRUE | 751,496   | 832  | 780  | 15  | NCBI assembly | MAG | natural       | NA |
| GCA_903847695.1_freshwater_MAG_---_YR_bin-4361             | CNA0070761 | 95.35 | 2.33 | 34.42 | 93.06 | TRUE | 557,216   | 597  | 564  | 65  | NCBI assembly | MAG | natural       | NA |
| GCA_903856615.1_freshwater_MAG_---_AM-lipid-01-D3_bin-1021 | CNA0070763 | 97.67 | 2.33 | 36.76 | 92.91 | TRUE | 727,480   | 815  | 769  | 24  | NCBI assembly | MAG | natural       | NA |
| GCA_903859325.1_freshwater_MAG_---_AM-lipid-02-D3_bin-0230 | CNA0070764 | 97.67 | 0    | 36.77 | 92.73 | TRUE | 747,206   | 827  | 781  | 19  | NCBI assembly | MAG | natural       | NA |
| GCA_903859365.1_freshwater_MAG_---_AM-lipid-02-D3_bin-0353 | CNA0070766 | 97.67 | 0    | 39.56 | 92.09 | TRUE | 716,498   | 772  | 727  | 13  | NCBI assembly | MAG | natural       | NA |
| GCA_903877025.1_freshwater_MAG_---_AlinenLipids_bin-2261   | CNA0070767 | 97.67 | 0    | 36.67 | 92.23 | TRUE | 844,312   | 958  | 914  | 27  | NCBI assembly | MAG | natural       | NA |
| GCA_903883035.1_freshwater_MAG_---_Umea_bin-05361          | CNA0070769 | 93.02 | 0    | 34.64 | 91.03 | TRUE | 825,529   | 925  | 884  | 85  | NCBI assembly | MAG | natural       | NA |
| GCA_903894915.1_freshwater_MAG_---_AlinenLipids_bin-5330   | CNA0070770 | 97.67 | 0    | 36.75 | 93.25 | TRUE | 712,859   | 793  | 749  | 16  | NCBI assembly | MAG | natural       | NA |
| GCA_903918245.1_freshwater_MAG_---_AM-lipid-01-D1_bin-099  | CNA0070772 | 95.35 | 0    | 36.80 | 92.83 | TRUE | 658,805   | 725  | 685  | 115 | NCBI assembly | MAG | natural       | NA |
| GCA_903925195.1_freshwater_MAG_---_YR_bin-4708             | CNA0070773 | 90.7  | 4.65 | 36.35 | 91.37 | TRUE | 929,291   | 1026 | 966  | 111 | NCBI assembly | MAG | natural       | NA |
| GCA_903937695.1_freshwater_MAG_---_Loc090907-1m_bin-354    | CNA0070775 | 95.35 | 2.33 | 41.43 | 92.38 | TRUE | 731,742   | 801  | 757  | 73  | NCBI assembly | MAG | natural       | NA |
| GCA_903946795.1_freshwater_MAG_---_Loc090907-4m_bin-620    | CNA0070776 | 97.67 | 0    | 41.61 | 90.45 | TRUE | 766,627   | 816  | 763  | 95  | NCBI assembly | MAG | natural       | NA |
| GCA_943350085.1_RH-15aug16-19                              | CNA0070820 | 97.67 | 0    | 42.45 | 92.16 | TRUE | 558,477   | 602  | 566  | 54  | NCBI assembly | MAG | natural       | NA |
| GCA_943353165.1_RH-20apr16-349                             | CNA0070822 | 97.67 | 0    | 42.40 | 91.14 | TRUE | 639,318   | 691  | 646  | 5   | NCBI assembly | MAG | natural       | NA |
| GCA_943354005.1_MsH-30jul19-11                             | CNA0070823 | 97.67 | 0    | 40.43 | 91.29 | TRUE | 752,352   | 833  | 790  | 10  | NCBI assembly | MAG | natural       | NA |
| GCA_943354725.1_RH-27jun17-331                             | CNA0070825 | 93.02 | 0    | 40.67 | 92.18 | TRUE | 516,112   | 560  | 535  | 58  | NCBI assembly | MAG | natural       | NA |
| GCA_943354985.1_Jr-19feb18-57                              | CNA0070826 | 90.7  | 2.33 | 40.21 | 90.78 | TRUE | 749,716   | 771  | 743  | 80  | NCBI assembly | MAG | natural       | NA |
| GCA_943358135.1_MsH-01oct19-288                            | CNA0070828 | 97.67 | 0    | 40.46 | 91.48 | TRUE | 731,872   | 804  | 762  | 31  | NCBI assembly | MAG | natural       | NA |
| GCA_945872155.1_SRR15732359_bin.8_metaWRAP_v1.3_MAG        | CNA0070831 | 95.35 | 0    | 45.70 | 90.75 | TRUE | 606,324   | 618  | 574  | 43  | NCBI assembly | MAG | other mammals | NA |
| GCA_945873065.1_SRR15732359_bin.18_metaWRAP_v1.3_MAG       | CNA0070833 | 100   | 0    | 46.84 | 89.59 | TRUE | 853,655   | 883  | 837  | 6   | NCBI assembly | MAG | other mammals | NA |
| GCA_946404095.1_SRR12081303_bin.66_metaWRAP_v1.3_MAG       | CNA0070836 | 100   | 0    | 43.66 | 93.31 | TRUE | 680,380   | 671  | 629  | 11  | NCBI assembly | MAG | other mammals | NA |
| GCA_946404545.1_SRR12081298_bin.7_metaWRAP_v1.3_MAG        | CNA0070837 | 95.35 | 0    | 48.17 | 92.77 | TRUE | 801,087   | 822  | 781  | 21  | NCBI assembly | MAG | other mammals | NA |
| GCA_946405975.1_SRR12081303_bin.106_metaWRAP_v1.3_MAG      | CNA0070838 | 100   | 0    | 45.32 | 92.40 | TRUE | 703,943   | 742  | 696  | 6   | NCBI assembly | MAG | other mammals | NA |
| GCA_946406315.1_SRR12081301_bin.45_metaWRAP_v1.3_MAG       | CNA0070840 | 100   | 0    | 42.33 | 88.63 | TRUE | 1,074,688 | 1035 | 982  | 26  | NCBI assembly | MAG | other mammals | NA |
| GCA_946406645.1_SRR12081302_bin.54_metaWRAP_v1.3_MAG       | CNA0070841 | 95.35 | 0    | 48.44 | 92.09 | TRUE | 666,110   | 685  | 657  | 33  | NCBI assembly | MAG | other mammals | NA |
| GCA_946407955.1_SRR12081294_bin.80_metaWRAP_v1.3_MAG       | CNA0070843 | 100   | 0    | 44.62 | 92.19 | TRUE | 895,247   | 888  | 839  | 3   | NCBI assembly | MAG | other mammals | NA |
| GCA_946408075.1_SRR12081296_bin.6_metaWRAP_v1.3_MAG        | CNA0070844 | 95.35 | 0    | 48.40 | 91.20 | TRUE | 1,079,710 | 1031 | 989  | 16  | NCBI assembly | MAG | other mammals | NA |
| GCA_946408595.1_SRR12081297_bin.13_metaWRAP_v1.3_MAG       | CNA0070846 | 100   | 0    | 41.97 | 93.59 | TRUE | 737,758   | 727  | 682  | 16  | NCBI assembly | MAG | other mammals | NA |
| GCA_946409605.1_SRR12081300_bin.39_metaWRAP_v1.3_MAG       | CNA0070848 | 100   | 2.33 | 43.62 | 93.15 | TRUE | 938,972   | 892  | 844  | 45  | NCBI assembly | MAG | other mammals | NA |
| GCA_946411665.1_SRR12081298_bin.32_metaWRAP_v1.3_MAG       | CNA0070849 | 97.67 | 0    | 44.02 | 90.13 | TRUE | 941,235   | 925  | 883  | 41  | NCBI assembly | MAG | other mammals | NA |
| GCA_946414345.1_SRR12081302_bin.4_metaWRAP_v1.3_MAG        | CNA0070851 | 95.35 | 2.33 | 41.98 | 92.96 | TRUE | 861,140   | 819  | 776  | 29  | NCBI assembly | MAG | other mammals | NA |
| GCA_946414465.1_SRR12081303_bin.63_metaWRAP_v1.3_MAG       | CNA0070852 | 100   | 2.33 | 40.72 | 92.33 | TRUE | 849,248   | 852  | 802  | 18  | NCBI assembly | MAG | other mammals | NA |
| GCA_946478715.1_SRR10754055_bin.5_metawrap_v1.3.0_MAG      | CNA0070854 | 97.67 | 0    | 54.05 | 91.52 | TRUE | 557,818   | 657  | 627  | 91  | NCBI assembly | MAG | natural       | NA |
| GCA_946478995.1_SRR15094062_bin.6_metawrap_v1.3.0_MAG      | CNA0070855 | 97.67 | 0    | 46.30 | 93.61 | TRUE | 855,070   | 959  | 923  | 98  | NCBI assembly | MAG | natural       | NA |
| GCA_946479115.1_ERR5385026_bin.7_metawrap_v1.3.0_MAG       | CNA0070857 | 93.02 | 0    | 45.66 | 90.81 | TRUE | 840,907   | 919  | 884  | 85  | NCBI assembly | MAG | natural       | NA |
| GCA_946479835.1_SRR15094062_bin.4_metawrap_v1.3.0_MAG      | CNA0070858 | 90.7  | 0    | 52.97 | 91.68 | TRUE | 656,375   | 771  | 734  | 35  | NCBI assembly | MAG | natural       | NA |
| GCA_946480535.1_SRR14536364_bin.32_metawrap_v1.3.0_MAG     | CNA0070860 | 97.67 | 0    | 49.40 | 91.65 | TRUE | 929,743   | 1016 | 978  | 66  | NCBI assembly | MAG | natural       | NA |
| GCA_946482285.1_SRR14536431_bin.16_metawrap_v1.3.0_MAG     | CNA0070861 | 97.67 | 0    | 49.71 | 91.44 | TRUE | 1,244,327 | 1288 | 1245 | 4   | NCBI assembly | MAG | natural       | NA |
| GCA_946482575.1_SRR14536435_bin.26_metawrap_v1.3.0_MAG     | CNA0070862 | 90.7  | 0    | 50.93 | 91.39 | TRUE | 955,412   | 1029 | 997  | 25  | NCBI assembly | MAG | natural       | NA |
| GCA_946530965.1_SRR873598_bin.145_metaWRAP_v1.3_MAG        | CNA0070864 | 100   | 0    | 43.78 | 89.99 | TRUE | 997,113   | 983  | 937  | 3   | NCBI assembly | MAG | other mammals | NA |
| GCA_946548715.1_SRR1222429_bin.13_metaWRAP_v1.3_MAG        | CNA0070866 | 95.35 | 2.33 | 45.57 | 91.52 | TRUE | 781,578   | 735  | 689  | 26  | NCBI assembly | MAG | other mammals | NA |
| GCA_946561855.1_SRR19792994_bin.70_metawrap_v1.3_MAG       | CNA0070867 | 93.02 | 0    | 45.44 | 89.33 | TRUE | 690,406   | 696  | 658  | 41  | NCBI assembly | MAG | other mammals | NA |
| GCA_946618085.1_SRR873610_bin.1_metaWRAP_v1.3_MAG          | CNA0070869 | 100   | 0    | 39.72 | 92.26 | TRUE | 635,485   | 678  | 630  | 14  | NCBI assembly | MAG | other mammals | NA |
| GCA_946619905.1_SRR873600_bin.141_metaWRAP_v1.3_MAG        | CNA0070870 | 100   | 0    | 45.19 | 92.26 | TRUE | 942,086   | 961  | 914  | 6   | NCBI assembly | MAG | other mammals | NA |
| GCA_946624835.1_SRR873600_bin.13_metaWRAP_v1.3_MAG         | CNA0070872 | 90.7  | 0    | 46.16 | 92.44 | TRUE | 690,826   | 723  | 690  | 58  | NCBI assembly | MAG | other mammals | NA |
| GCA_946626365.1_SRR873609_bin.132_metaWRAP_v1.3_MAG        | CNA0070873 | 93.02 | 0    | 48.53 | 91.90 | TRUE | 679,100   | 701  | 655  | 14  | NCBI assembly | MAG | other mammals | NA |
| GCA_947057165.1_ERR9465706_bin.42_metawrap_v1.3_MAG        | CNA0070884 | 95.35 | 0    | 45.40 | 89.05 | TRUE | 694,014   | 709  | 674  | 74  | NCBI assembly | MAG | other mammals | NA |
| GCA_947059195.1_ERR9465699_bin.49_metawrap_v1.3_MAG        | CNA0070885 | 97.67 | 0    | 44.07 | 86.62 | TRUE | 904,882   | 916  | 873  | 36  | NCBI assembly | MAG | other mammals | NA |
| GCA_947066265.1_ERR899284_bin.41_metawrap_v1.3_MAG         | CNA0070887 | 97.67 | 0    | 43.43 | 88.01 | TRUE | 948,495   | 967  | 917  | 47  | NCBI assembly | MAG | other mammals | NA |
| GCA_947068245.1_SRR12358625_bin.21_metawrap_v1.3_MAG       | CNA0070888 | 97.67 | 0    | 43.03 | 85.64 | TRUE | 927,795   | 915  | 859  | 75  | NCBI assembly | MAG | other mammals | NA |
| GCA_947087275.1_SRR14038240_bin.4_metawrap_v1.3_MAG        | CNA0070889 | 97.67 | 0    | 46.45 | 88.27 | TRUE | 829,342   | 849  | 811  | 15  | NCBI assembly | MAG | other mammals | NA |
| GCA_947089645.1_SRR14038237_bin.40_metawrap_v1.3_MAG       | CNA0070891 | 97.67 | 0    | 44.21 | 85.27 | TRUE | 913,183   | 914  | 867  | 18  | NCBI assembly | MAG | other mammals | NA |
| GCA_947165465.1_SRR8387716_bin.80_metaWRAP_v1.3_MAG        | CNA0070901 | 97.67 | 0    | 43.83 | 93.37 | TRUE | 785,437   | 771  | 729  | 13  | NCBI assembly | MAG | other mammals | NA |
| GCA_947165975.1_SRR8387714_bin.97_metaWRAP_v1.3_MAG        | CNA0070903 | 100   | 0    | 39.90 | 91.96 | TRUE | 882,197   | 881  | 835  | 31  | NCBI assembly | MAG | other mammals | NA |
| GCA_947166125.1_SRR8387714_bin.9_metaWRAP_v1.3_MAG         | CNA0070904 | 100   | 0    | 41.65 | 89.81 | TRUE | 816,580   | 805  | 756  | 8   | NCBI assembly | MAG | other mammals | NA |
| GCA_947168545.1_SRR8387715_bin.82_metaWRAP_v1.3_MAG        | CNA0070906 | 100   | 0    | 42.05 | 91.81 | TRUE | 733,068   | 770  | 721  | 10  | NCBI assembly | MAG | other mammals | NA |
| GCA_947171955.1_SRR14862904_bin.27_metawrap_v1.3_MAG       | CNA0070907 | 100   | 0    | 45.31 | 87.75 | TRUE | 817,271   | 819  | 772  | 11  | NCBI assembly | MAG | other mammals | NA |
| GCA_947246665.1_SRR14920969_bin.19_metawrap_v1.3_MAG       | CNA0070909 | 97.67 | 0    | 43.94 | 85.52 | TRUE | 980,297   | 1004 | 955  | 26  | NCBI assembly | MAG | other mammals | NA |
| GCA_947296925.1_SRR19390379_bin.6_metawrap_v1.3_MAG        | CNA0070917 | 97.67 | 0    | 43.67 | 87.67 | TRUE | 851,147   | 865  | 817  | 38  | NCBI assembly | MAG | other mammals | NA |
| GCA_947302355.1_SRR10912539_bin.48_metaWRAP_v1.3_MAG       | CNA0070919 | 97.67 | 2.33 | 41.94 | 92.05 | TRUE | 726,768   | 727  | 685  | 17  | NCBI assembly | MAG | other mammals | NA |
| GCA_947302975.1_SRR10912535_bin.55_metaWRAP_v1.3_MAG       | CNA0070920 | 95.35 | 0    | 45.31 | 93.13 | TRUE | 672,970   | 698  | 654  | 18  | NCBI assembly | MAG | other mammals | NA |
| GCA_947303265.1_SRR10912539_bin.36_metaWRAP_v1.3_MAG       | CNA0070922 | 93.02 | 0    | 43.83 | 87.73 | TRUE | 830,116   | 804  | 760  | 25  | NCBI assembly | MAG | other mammals | NA |
| GCA_947303945.1_SRR10912540_bin.27_metaWRAP_v1.3_MAG       | CNA0070923 | 100   | 0    | 42.33 | 88.97 | TRUE | 1,288,167 | 1337 | 1286 | 45  | NCBI assembly | MAG | other mammals | NA |
| GCA_947304135.1_SRR10912535_bin.47_metaWRAP_v1.3_MAG       | CNA0070925 | 95.35 | 0    | 45.36 | 91.48 | TRUE | 711,455   | 714  | 669  | 22  | NCBI assembly | MAG | other mammals | NA |
| GCA_947304155.1_SRR10912535_bin.54_metaWRAP_v1.3_MAG       | CNA0070926 | 93.02 | 0    | 41.38 | 91.82 | TRUE | 770,681   | 765  | 723  | 11  | NCBI assembly | MAG | other mammals | NA |
| GCA_947304395.1_SRR10912535_bin.78_metaWRAP_v1.3_MAG       | CNA0070928 | 93.02 | 0    | 43.58 | 89.95 | TRUE | 1,021,041 | 1052 | 1011 | 23  | NCBI assembly | MAG | other mammals | NA |
| GCA_947304825.1_SRR10912542_bin.28_metaWRAP_v1.3_MAG       | CNA0070929 | 90.7  | 2.33 | 43.37 | 89.12 | TRUE | 625,226   | 597  | 566  | 82  | NCBI assembly | MAG | other mammals | NA |
| GCA_947304955.1_SRR10912542_bin.53_metaWRAP_v1.3_MAG       | CNA0070931 | 100   | 0    | 44.13 | 90.65 | TRUE | 887,627   | 880  | 838  | 54  | NCBI assembly | MAG | other mammals | NA |
| GCA_947306055.1_SRR10912535_bin.62_metaWRAP_v1.3_MAG       | CNA0070932 | 90.7  | 0    | 43.51 | 92.52 | TRUE | 523,253   | 539  | 506  | 21  | NCBI assembly | MAG | other mammals | NA |
| GCA_947306835.1_SRR10912542_bin.23_metaWRAP_v1.3_MAG       | CNA0070933 | 100   | 0    | 48.67 | 91.98 | TRUE | 708,384   | 719  | 677  | 14  | NCBI assembly | MAG | other mammals | NA |
| GCA_947307355.1_SRR10912536_bin.13_metaWR                  |            |       |      |       |       |      |           |      |      |     |               |     |               |    |



|                                                      |            |       |   |       |       |      |           |      |      |     |               |     |               |    |
|------------------------------------------------------|------------|-------|---|-------|-------|------|-----------|------|------|-----|---------------|-----|---------------|----|
| GCA_947364605.1_SRR16350204_bin.1_metawrap_v1.3_MAG  | CNA0070940 | 93.02 | 0 | 46.52 | 87.95 | TRUE | 769,420   | 802  | 756  | 36  | NCBI assembly | MAG | other mammals | NA |
| GCA_947364625.1_SRR16350215_bin.9_metawrap_v1.3_MAG  | CNA0070942 | 95.35 | 0 | 47.30 | 87.70 | TRUE | 826,712   | 837  | 801  | 121 | NCBI assembly | MAG | other mammals | NA |
| GCA_947364965.1_SRR16350202_bin.8_metawrap_v1.3_MAG  | CNA0070943 | 93.02 | 0 | 49.85 | 84.89 | TRUE | 892,853   | 871  | 828  | 101 | NCBI assembly | MAG | other mammals | NA |
| GCA_947366635.1_SRR15322614_bin.1_metawrap_v1.3_MAG  | CNA0070945 | 97.67 | 0 | 43.47 | 86.76 | TRUE | 966,688   | 975  | 937  | 92  | NCBI assembly | MAG | other mammals | NA |
| GCA_947366925.1_SRR15322611_bin.1_metawrap_v1.3_MAG  | CNA0070946 | 97.67 | 0 | 44.14 | 86.75 | TRUE | 920,931   | 933  | 888  | 60  | NCBI assembly | MAG | other mammals | NA |
| GCA_947367495.1_SRR15429271_bin.12_metawrap_v1.3_MAG | CNA0070947 | 97.67 | 0 | 46.71 | 88.73 | TRUE | 813,569   | 856  | 808  | 38  | NCBI assembly | MAG | other mammals | NA |
| GCA_947367795.1_SRR15431173_bin.17_metawrap_v1.3_MAG | CNA0070949 | 97.67 | 0 | 47.79 | 87.72 | TRUE | 860,540   | 854  | 808  | 38  | NCBI assembly | MAG | other mammals | NA |
| GCA_947368805.1_SRR15431190_bin.13_metawrap_v1.3_MAG | CNA0070950 | 95.35 | 0 | 46.54 | 87.51 | TRUE | 745,675   | 732  | 690  | 75  | NCBI assembly | MAG | other mammals | NA |
| GCA_947384105.1_ERR6760075_bin.53_metawrap_v1.3_MAG  | CNA0070951 | 100   | 0 | 44.96 | 88.16 | TRUE | 831,918   | 830  | 785  | 23  | NCBI assembly | MAG | other mammals | NA |
| GCA_947385605.1_ERR6760111_bin.57_metawrap_v1.3_MAG  | CNA0070953 | 95.35 | 0 | 47.79 | 86.79 | TRUE | 826,188   | 831  | 790  | 19  | NCBI assembly | MAG | other mammals | NA |
| GCA_947388495.1_SRR15214593_bin.20_metawrap_v1.3_MAG | CNA0070954 | 97.67 | 0 | 44.44 | 88.15 | TRUE | 832,583   | 827  | 786  | 46  | NCBI assembly | MAG | other mammals | NA |
| GCA_947388865.1_SRR15214599_bin.4_metawrap_v1.3_MAG  | CNA0070956 | 97.67 | 0 | 42.15 | 79.23 | TRUE | 1,149,585 | 1055 | 1012 | 67  | NCBI assembly | MAG | other mammals | NA |
| GCA_947388865.1_SRR15214585_bin.22_metawrap_v1.3_MAG | CNA0070957 | 100   | 0 | 43.83 | 85.29 | TRUE | 939,084   | 907  | 863  | 37  | NCBI assembly | MAG | other mammals | NA |
| GCA_947389435.1_SRR15214583_bin.47_metawrap_v1.3_MAG | CNA0070959 | 97.67 | 0 | 48.01 | 87.47 | TRUE | 850,366   | 834  | 791  | 27  | NCBI assembly | MAG | other mammals | NA |
| GCA_947425245.1_SRR19981124_bin.25_metawrap_v1.3_MAG | CNA0070960 | 97.67 | 0 | 45.90 | 87.35 | TRUE | 882,450   | 892  | 844  | 22  | NCBI assembly | MAG | other mammals | NA |
| GCA_947425855.1_SRR19981115_bin.7_metawrap_v1.3_MAG  | CNA0070962 | 90.7  | 0 | 51.10 | 86.79 | TRUE | 756,737   | 707  | 674  | 18  | NCBI assembly | MAG | other mammals | NA |
| GCA_947425995.1_SRR19981123_bin.1_metawrap_v1.3_MAG  | CNA0070963 | 100   | 0 | 46.82 | 88.91 | TRUE | 803,528   | 844  | 798  | 13  | NCBI assembly | MAG | other mammals | NA |
| GCA_947426085.1_SRR18439536_bin.4_metawrap_v1.3_MAG  | CNA0070965 | 95.35 | 0 | 46.98 | 89.00 | TRUE | 766,460   | 787  | 748  | 21  | NCBI assembly | MAG | other mammals | NA |
| GCA_947427335.1_SRR18439536_bin.19_metawrap_v1.3_MAG | CNA0070966 | 95.35 | 0 | 45.36 | 88.74 | TRUE | 884,193   | 911  | 865  | 28  | NCBI assembly | MAG | other mammals | NA |
| GCA_947428935.1_SRR19981124_bin.14_metawrap_v1.3_MAG | CNA0070967 | 100   | 0 | 44.85 | 79.69 | TRUE | 1,103,184 | 1013 | 965  | 27  | NCBI assembly | MAG | other mammals | NA |
| GCA_947429035.1_SRR19981115_bin.12_metawrap_v1.3_MAG | CNA0070969 | 100   | 0 | 45.41 | 88.87 | TRUE | 745,395   | 749  | 712  | 55  | NCBI assembly | MAG | other mammals | NA |
| GCA_947429355.1_SRR19981115_bin.23_metawrap_v1.3_MAG | CNA0070970 | 97.67 | 0 | 45.44 | 87.99 | TRUE | 925,275   | 956  | 911  | 30  | NCBI assembly | MAG | other mammals | NA |
| GCA_947565505.1_SRR19759417_bin.86_metawrap_v1.3_MAG | CNA0070972 | 97.67 | 0 | 42.16 | 78.82 | TRUE | 1,114,117 | 1008 | 969  | 75  | NCBI assembly | MAG | other mammals | NA |
| GCA_947569885.1_SRR15604579_bin.36_metawrap_v1.3_MAG | CNA0070973 | 100   | 0 | 42.19 | 76.92 | TRUE | 1,192,158 | 1089 | 1019 | 66  | NCBI assembly | MAG | other mammals | NA |
| GCA_947648615.1_SRR15633991_bin.36_metawrap_v1.3_MAG | CNA0070975 | 100   | 0 | 46.71 | 87.00 | TRUE | 1,064,832 | 1097 | 1049 | 18  | NCBI assembly | MAG | other mammals | NA |

# Supplementary Table 2. Taxonomic annotation for Saccharibacterial 2,041 genomes and 759 representative clusters.

| GenomeID                                                   | Annotation level  | Cluster ID | Representative clusters | GTDB classification |                 |                   |                    |                 |                             |
|------------------------------------------------------------|-------------------|------------|-------------------------|---------------------|-----------------|-------------------|--------------------|-----------------|-----------------------------|
|                                                            |                   |            |                         | Phylum              | Class           | Order             | Family             | Genus           | Species                     |
| GCA_003153395.1_20120700_P3D                               | annotated species | cluster1   | cluster1                | Patescibacteria     | Saccharimonadia | Saccharimonadales | UBA4665            | UBA5150         | UBA5150 sp003153395         |
| GCA_009691435.1_ASM969143v1                                | annotated species | cluster2   | cluster2                | Patescibacteria     | Saccharimonadia | CAILAD01          | BJGX01             | SICB01          | SICB01 sp009691435          |
| GCA_016191105.1_ASM1619110v1                               | annotated species | cluster3   | cluster3                | Patescibacteria     | Saccharimonadia | CAILAD01          | JACPPH01           | JACPPH01        | JACPPH01 sp016191105        |
| GCA_947253405.1_SRR17635715_bin.15_metaWRAP_v1.3_MAG       | novel genus       | cluster4   | cluster4                | Patescibacteria     | Saccharimonadia | Saccharimonadales | Nanoperiomorpaceae |                 |                             |
| GCA_013816445.1_ASM1381644v1                               | annotated species | cluster5   | cluster5                | Patescibacteria     | Saccharimonadia | CAILAD01          | CAILAD01           | CAILAD01        | CAILAD01 sp013816445        |
| GCA_021404905.1_ASM2140490v1                               | novel family      | cluster6   | cluster6                | Patescibacteria     | Saccharimonadia | Saccharimonadales |                    |                 |                             |
| GCA_946478995.1_SRR15094062_bin.6_metawrap_v1.3.0_MAG      | novel species     | cluster7   | cluster7                | Patescibacteria     | Saccharimonadia | Saccharimonadales | 2-12-FULL-41-12    | JACRNE01        |                             |
| GCA_001790525.1_ASM179052v1                                | annotated species | cluster8   | cluster8                | Patescibacteria     | Saccharimonadia | Saccharimonadales | UBA10212           | UBA10212        | UBA10212 sp001790525        |
| GCA_009778675.1_ASM977867v1                                | annotated species | cluster9   | cluster9                | Patescibacteria     | Saccharimonadia | Saccharimonadales | Nanosyncoccaceae   | WRFU01          | WRFU01 sp009778675          |
| GCA_009781895.1_ASM978189v1                                | annotated species | cluster10  | cluster10               | Patescibacteria     | Saccharimonadia | Saccharimonadales | Nanosyncoccaceae   | WQUV01          | WQUV01 sp009781895          |
| GCA_001790445.1_ASM179044v1                                | annotated species | cluster11  | cluster11               | Patescibacteria     | Saccharimonadia | Saccharimonadales | 2-12-FULL-41-12    | 2-12-FULL-41-12 | 2-12-FULL-41-12 sp001790445 |
| GCA_002331045.1_ASM233104v1                                | annotated species | cluster12  | cluster12               | Patescibacteria     | Saccharimonadia | Saccharimonadales | UBA2112            | UBA2112         | UBA2112 sp002331045         |
| GCA_018060465.1_ASM1806046v1                               | annotated species | cluster13  | cluster13               | Patescibacteria     | Saccharimonadia | Saccharimonadales | UBA1020            | UBA1020         | UBA1020 sp018060465         |
| GCA_012965045.1_ASM1296504v1                               | annotated species | cluster14  | cluster14               | Patescibacteria     | Saccharimonadia | Saccharimonadales | DTSZ01             | DTSZ01          | DTSZ01 sp012965045          |
| GCA_015663315.1_ASM1566331v1                               | annotated species | cluster14  | cluster14               | Patescibacteria     | Saccharimonadia | Saccharimonadales | DTSZ01             | DTSZ01          | DTSZ01 sp012965045          |
| GCA_020428435.1_ASM2042843v1                               | novel family      | cluster15  | cluster15               | Patescibacteria     | Saccharimonadia | Saccharimonadales |                    |                 |                             |
| GCA_003962975.1_ASM396297v1                                | annotated species | cluster16  | cluster16               | Patescibacteria     | Saccharimonadia | Saccharimonadales | AWTP1-31           | AWTP1-31        | AWTP1-31 sp003962975        |
| GCA_001790455.1_ASM179045v1                                | annotated species | cluster17  | cluster17               | Patescibacteria     | Saccharimonadia | Saccharimonadales | UBA10212_A         | 2-02-FULL-47-12 | 2-02-FULL-47-12 sp001790455 |
| GCA_003133385.1_20120500_P26                               | annotated species | cluster18  | cluster18               | Patescibacteria     | Saccharimonadia | Saccharimonadales | UBA4665            | UBA5150         | UBA5150 sp003133385         |
| GCA_026706615.1_ASM2670661v1                               | novel species     | cluster19  | cluster19               | Patescibacteria     | Saccharimonadia | Saccharimonadales | VXPC01             | VXPC01          |                             |
| GCA_026707815.1_ASM2670781v1                               | novel species     | cluster19  | cluster19               | Patescibacteria     | Saccharimonadia | Saccharimonadales | VXPC01             | VXPC01          |                             |
| GCA_026708245.1_ASM2670824v1                               | novel species     | cluster19  | cluster19               | Patescibacteria     | Saccharimonadia | Saccharimonadales | VXPC01             | VXPC01          |                             |
| GCA_013815775.1_ASM1381577v1                               | annotated species | cluster20  | cluster20               | Patescibacteria     | Saccharimonadia | Saccharimonadales | UBA10212           | JACDFN01        | JACDFN01 sp013815775        |
| GCA_024635455.1_ASM2463545v1                               | novel genus       | cluster21  | cluster21               | Patescibacteria     | Saccharimonadia | Saccharimonadales | SLHW01             |                 |                             |
| GCA_016789455.1_ASM1678945v1                               | annotated species | cluster22  | cluster22               | Patescibacteria     | Saccharimonadia | Saccharimonadales | CAIJKY01           | CAIJKY01        | CAIJKY01 sp016789455        |
| GCA_020428525.1_ASM2042852v1                               | novel genus       | cluster23  | cluster23               | Patescibacteria     | Saccharimonadia | Saccharimonadales | VXPC01             |                 |                             |
| GCA_025273655.1_ASM2527365v1                               | novel genus       | cluster24  | cluster24               | Patescibacteria     | Saccharimonadia | Saccharimonadales | UBA10027           |                 |                             |
| GCA_027492635.1_ASM2749263v1                               | novel genus       | cluster25  | cluster25               | Patescibacteria     | Saccharimonadia | Saccharimonadales | UBA10027           |                 |                             |
| GCA_018062785.1_ASM1806278v1                               | annotated species | cluster26  | cluster26               | Patescibacteria     | Saccharimonadia | Saccharimonadales | UBA4665            | JAGORO01        | JAGORO01 sp018062785        |
| GCA_001788555.1_ASM178855v1                                | annotated species | cluster27  | cluster27               | Patescibacteria     | Saccharimonadia | Saccharimonadales | UBA10212           | 2-01-FULL-49-22 | 2-01-FULL-49-22 sp001788555 |
| GCA_001788565.1_ASM178856v1                                | annotated species | cluster27  | cluster27               | Patescibacteria     | Saccharimonadia | Saccharimonadales | UBA10212           | 2-01-FULL-49-22 | 2-01-FULL-49-22 sp001788565 |
| GCA_001790625.1_ASM179062v1                                | annotated species | cluster27  | cluster27               | Patescibacteria     | Saccharimonadia | Saccharimonadales | UBA10212           | 2-01-FULL-49-22 | 2-01-FULL-49-22 sp001788565 |
| GCA_016183515.1_ASM1618351v1                               | novel genus       | cluster28  | cluster28               | Patescibacteria     | Saccharimonadia | Saccharimonadales | UBA10212           |                 |                             |
| GCA_003164595.1_20120700_S1D                               | annotated species | cluster29  | cluster29               | Patescibacteria     | Saccharimonadia | Saccharimonadales | UBA4665            | BOG-1338        | BOG-1338 sp003164595        |
| GCA_027314885.1_ASM2731488v1                               | novel species     | cluster30  | cluster30               | Patescibacteria     | Saccharimonadia | Saccharimonadales | UBA4665            | UBA5150         |                             |
| GCA_027366415.1_ASM2736641v1                               | novel species     | cluster31  | cluster31               | Patescibacteria     | Saccharimonadia | Saccharimonadales | UBA4665            | UBA5150         |                             |
| GCA_002952755.1_ASM295275v1                                | annotated species | cluster32  | cluster32               | Patescibacteria     | Saccharimonadia | Saccharimonadales | UBA4665            | PMNU01          | PMNU01 sp002952755          |
| GCA_027356125.1_ASM2735612v1                               | novel genus       | cluster33  | cluster33               | Patescibacteria     | Saccharimonadia | Saccharimonadales | UBA4665_A          |                 |                             |
| GCA_027365555.1_ASM2736555v1                               | novel genus       | cluster34  | cluster34               | Patescibacteria     | Saccharimonadia | Saccharimonadales | UBA4665_A          |                 |                             |
| GCA_903937695.1_freshwater_MAG_---_Loc090907-1m_bin-354    | annotated species | cluster35  | cluster35               | Patescibacteria     | Saccharimonadia | Saccharimonadales | AWTP1-31           | AWTP1-31        | AWTP1-31 sp903946795        |
| GCA_903946795.1_freshwater_MAG_---_Loc090907-4m_bin-620    | annotated species | cluster35  | cluster35               | Patescibacteria     | Saccharimonadia | Saccharimonadales | AWTP1-31           | AWTP1-31        | AWTP1-31 sp903946795        |
| GCA_943354005.1_MsH-30jul19-11                             | novel species     | cluster36  | cluster36               | Patescibacteria     | Saccharimonadia | Saccharimonadales | AWTP1-31           | AWTP1-31        |                             |
| GCA_943358135.1_MsH-01oct19-288                            | novel species     | cluster36  | cluster36               | Patescibacteria     | Saccharimonadia | Saccharimonadales | AWTP1-31           | AWTP1-31        |                             |
| GCA_026395395.1_ASM2639539v1                               | novel species     | cluster37  | cluster37               | Patescibacteria     | Saccharimonadia | Saccharimonadales | AWTP1-31           | AWTP1-31        |                             |
| GCA_943354725.1_RH-27jun17-331                             | novel species     | cluster38  | cluster38               | Patescibacteria     | Saccharimonadia | Saccharimonadales | AWTP1-31           | AWTP1-31        |                             |
| GCA_026395435.1_ASM2639543v1                               | novel species     | cluster39  | cluster39               | Patescibacteria     | Saccharimonadia | Saccharimonadales | AWTP1-31           | AWTP1-31        |                             |
| GCA_903821315.1_freshwater_MAG_---_AM-lipid-01-D2_bin-004  | annotated species | cluster40  | cluster40               | Patescibacteria     | Saccharimonadia | Saccharimonadales | CAIOMD01           | CAIOMD01        | CAIOMD01 sp903859365        |
| GCA_903831735.1_freshwater_MAG_---_AlinenLipids_bin-2074   | annotated species | cluster40  | cluster40               | Patescibacteria     | Saccharimonadia | Saccharimonadales | CAIOMD01           | CAIOMD01        | CAIOMD01 sp903859365        |
| GCA_903832815.1_freshwater_MAG_---_AM-lipid-01-D1_bin-110  | annotated species | cluster40  | cluster40               | Patescibacteria     | Saccharimonadia | Saccharimonadales | CAIOMD01           | CAIOMD01        | CAIOMD01 sp903859365        |
| GCA_903859365.1_freshwater_MAG_---_AM-lipid-02-D3_bin-0353 | annotated species | cluster40  | cluster40               | Patescibacteria     | Saccharimonadia | Saccharimonadales | CAIOMD01           | CAIOMD01        | CAIOMD01 sp903859365        |
| GCA_903829335.1_freshwater_MAG_---_AM-lipid-02-D1_bin-0304 | annotated species | cluster41  | cluster41               | Patescibacteria     | Saccharimonadia | Saccharimonadales | UBA4665            | CAIYEO01        | CAIYEO01 sp903840315        |
| GCA_903840315.1_freshwater_MAG_---_AM-lipid-02-D2_bin-0413 | annotated species | cluster41  | cluster41               | Patescibacteria     | Saccharimonadia | Saccharimonadales | UBA4665            | CAIYEO01        | CAIYEO01 sp903840315        |
| GCA_903856615.1_freshwater_MAG_---_AM-lipid-01-D3_bin-1021 | annotated species | cluster41  | cluster41               | Patescibacteria     | Saccharimonadia | Saccharimonadales | UBA4665            | CAIYEO01        | CAIYEO01 sp903840315        |
| GCA_903859325.1_freshwater_MAG_---_AM-lipid-02-D3_bin-0230 | annotated species | cluster41  | cluster41               | Patescibacteria     | Saccharimonadia | Saccharimonadales | UBA4665            | CAIYEO01        | CAIYEO01 sp903840315        |
| GCA_903894915.1_freshwater_MAG_---_AlinenLipids_bin-5330   | annotated species | cluster41  | cluster41               | Patescibacteria     | Saccharimonadia | Saccharimonadales | UBA4665            | CAIYEO01        | CAIYEO01 sp903840315        |
| GCA_903918245.1_freshwater_MAG_---_AM-lipid-01-D1_bin-099  | annotated species | cluster41  | cluster41               | Patescibacteria     | Saccharimonadia | Saccharimonadales | UBA4665            | CAIYEO01        | CAIYEO01 sp903840315        |
| GCA_903839435.1_freshwater_MAG_---_Kiruna_bin-08663        | novel species     | cluster42  | cluster42               | Patescibacteria     | Saccharimonadia | Saccharimonadales | UBA4665            | CAIYEO01        |                             |
| GCA_025451045.1_ASM2545104v1                               | novel species     | cluster43  | cluster43               | Patescibacteria     | Saccharimonadia | Saccharimonadales | 2-12-FULL-41-12    | JACRNE01        |                             |
| GCA_027315225.1_ASM2731522v1                               | novel species     | cluster44  | cluster44               | Patescibacteria     | Saccharimonadia | Saccharimonadales | UBA4665            | RGVC01          |                             |
| GCA_016699935.1_ASM1669993v1                               | annotated species | cluster45  | cluster45               | Patescibacteria     | Saccharimonadia | Saccharimonadales | UBA4665            | GCA-2746885     | GCA-2746885 sp016699935     |
| GCA_016700375.1_ASM1670037v1                               | annotated species | cluster46  | cluster46               | Patescibacteria     | Saccharimonadia | Saccharimonadales | UBA4665            | GCA-2746885     | GCA-2746885 sp016700375     |





|                                                        |                   |            |            |                 |                 |                   |                    |                   |                               |
|--------------------------------------------------------|-------------------|------------|------------|-----------------|-----------------|-------------------|--------------------|-------------------|-------------------------------|
| GCA_027426655.1_ASM2742665v1                           | novel genus       | cluster84  |            | Patescibacteria | Saccharimonadia | Saccharimonadales | UBA4665_A          |                   |                               |
| GCA_027426675.1_ASM2742667v1                           | novel genus       | cluster84  | cluster84  | Patescibacteria | Saccharimonadia | Saccharimonadales | UBA4665_A          |                   |                               |
| GCA_027426695.1_ASM2742669v1                           | novel genus       | cluster84  |            | Patescibacteria | Saccharimonadia | Saccharimonadales | UBA4665_A          |                   |                               |
| GCA_003231925.1_ASM323192v1                            | annotated species | cluster85  | cluster85  | Patescibacteria | Saccharimonadia | Saccharimonadales | SZUA-47            | SZUA-47           | SZUA-47 sp003231925           |
| GCA_007120515.1_ASM712051v1                            | annotated species | cluster86  |            | Patescibacteria | Saccharimonadia | Saccharimonadales | SLHW01             | SLHW01            | SLHW01 sp007135955            |
| GCA_007127855.1_ASM712785v1                            | annotated species | cluster86  |            | Patescibacteria | Saccharimonadia | Saccharimonadales | SLHW01             | SLHW01            | SLHW01 sp007135955            |
| GCA_007135955.1_ASM713595v1                            | annotated species | cluster86  | cluster86  | Patescibacteria | Saccharimonadia | Saccharimonadales | SLHW01             | SLHW01            | SLHW01 sp007135955            |
| GCA_027492535.1_ASM2749253v1                           | novel species     | cluster87  | cluster87  | Patescibacteria | Saccharimonadia | Saccharimonadales | Saccharimonadaceae | Saccharimonas     |                               |
| SZAXPI018406-56_RA_saliva.metaspades.bin.71            | novel genus       | cluster88  | cluster88  | Patescibacteria | saccharimonadia | Saccharimonadales | Nanosyncoccaceae   |                   |                               |
| GCA_946482285.1_SRR14536431_bin.16_metawrap_v1.3.0_MAG | novel genus       | cluster89  | cluster89  | Patescibacteria | Saccharimonadia | Saccharimonadales | UBA4665            |                   |                               |
| GCA_946482575.1_SRR14536435_bin.26_metawrap_v1.3.0_MAG | novel genus       | cluster90  | cluster90  | Patescibacteria | Saccharimonadia | Saccharimonadales | UBA4665            |                   |                               |
| GCA_027325955.1_ASM2732595v1                           | novel genus       | cluster91  | cluster91  | Patescibacteria | Saccharimonadia | Saccharimonadales | UBA4665            |                   |                               |
| GCA_002381545.1_ASM238154v1                            | annotated species | cluster92  |            | Patescibacteria | Saccharimonadia | Saccharimonadales | UBA1547            | UBA1547           | UBA1547 sp002413425           |
| GCA_002404315.1_ASM240431v1                            | annotated species | cluster92  |            | Patescibacteria | Saccharimonadia | Saccharimonadales | UBA1547            | UBA1547           | UBA1547 sp002413425           |
| GCA_002413425.1_ASM241342v1                            | annotated species | cluster92  | cluster92  | Patescibacteria | Saccharimonadia | Saccharimonadales | UBA1547            | UBA1547           | UBA1547 sp002413425           |
| GCA_015655045.1_ASM1565504v1                           | annotated species | cluster93  | cluster93  | Patescibacteria | Saccharimonadia | Saccharimonadales | UBA1547            | UBA1547           | UBA1547 sp015655045           |
| GCA_002404195.1_ASM240419v1                            | annotated species | cluster94  | cluster94  | Patescibacteria | Saccharimonadia | Saccharimonadales | UBA1547            | UBA6022           | UBA6022 sp002404195           |
| GCA_002427805.1_ASM242780v1                            | annotated species | cluster95  | cluster95  | Patescibacteria | Saccharimonadia | Saccharimonadales | UBA1547            | UBA1547           | UBA1547 sp002427805           |
| GCA_002429245.1_ASM242924v1                            | annotated species | cluster96  | cluster96  | Patescibacteria | Saccharimonadia | Saccharimonadales | UBA1547            | UBA6175           | UBA6175 sp002429245           |
| GCA_004100325.1_ASM410032v1                            | annotated species | cluster97  | cluster97  | Patescibacteria | Saccharimonadia | Saccharimonadales | UBA1547            | UBA6175           | UBA6175 sp004100325           |
| GCA_027450165.1_ASM2745016v1                           | novel genus       | cluster98  | cluster98  | Patescibacteria | Saccharimonadia | Saccharimonadales | UBA1547            |                   |                               |
| GCA_002381485.1_ASM238148v1                            | annotated species | cluster99  | cluster99  | Patescibacteria | Saccharimonadia | Saccharimonadales | UBA1547            | UBA6175           | UBA6175 sp002381485           |
| GCA_023253175.1_ASM2325317v1                           | novel species     | cluster100 | cluster100 | Patescibacteria | Saccharimonadia | Saccharimonadales | JACDFO01           | JACDFO01          |                               |
| GCA_025450135.1_ASM2545013v1                           | novel genus       | cluster101 | cluster101 | Patescibacteria | Saccharimonadia | Saccharimonadales | UBA4665            |                   |                               |
| GCA_016178135.1_ASM1617813v1                           | annotated species | cluster102 | cluster102 | Patescibacteria | Saccharimonadia | Saccharimonadales | JACDFO01           | JACOTW01          | JACOTW01 sp016178135          |
| GCA_016196105.1_ASM1619610v1                           | annotated species | cluster102 |            | Patescibacteria | Saccharimonadia | Saccharimonadales | JACDFO01           | JACOTW01          | JACOTW01 sp016178135          |
| GCA_943350085.1_RH-15aug16-19                          | novel species     | cluster103 |            | Patescibacteria | Saccharimonadia | Saccharimonadales | OMJO01             | OMJO01            |                               |
| GCA_943353165.1_RH-20apr16-349                         | novel species     | cluster103 | cluster103 | Patescibacteria | Saccharimonadia | Saccharimonadales | OMJO01             | OMJO01            |                               |
| GCA_002404125.1_ASM240412v1                            | annotated species | cluster104 |            | Patescibacteria | Saccharimonadia | Saccharimonadales | UBA4665            | UBA4729           | UBA4729 sp002413865           |
| GCA_002413865.1_ASM241386v1                            | annotated species | cluster104 | cluster104 | Patescibacteria | Saccharimonadia | Saccharimonadales | UBA4665            | UBA4729           | UBA4729 sp002413865           |
| GCA_002405335.1_ASM240533v1                            | annotated species | cluster105 |            | Patescibacteria | Saccharimonadia | Saccharimonadales | UBA4665            | UBA4665           | UBA4665 sp002413835           |
| GCA_002413835.1_ASM241383v1                            | annotated species | cluster105 | cluster105 | Patescibacteria | Saccharimonadia | Saccharimonadales | UBA4665            | UBA4665           | UBA4665 sp002413835           |
| GCA_002404255.1_ASM240425v1                            | annotated species | cluster106 |            | Patescibacteria | Saccharimonadia | Saccharimonadales | UBA4665            | UBA4665           | UBA4665 sp002413755           |
| GCA_002413755.1_ASM241375v1                            | annotated species | cluster106 | cluster106 | Patescibacteria | Saccharimonadia | Saccharimonadales | UBA4665            | UBA4665           | UBA4665 sp002413755           |
| GCA_013815785.1_ASM1381578v1                           | annotated species | cluster107 | cluster107 | Patescibacteria | Saccharimonadia | Saccharimonadales | JACDFO01           | JACDFO01          | JACDFO01 sp013815785          |
| GCA_025924835.1_ASM2592483v1                           | novel species     | cluster108 | cluster108 | Patescibacteria | Saccharimonadia | Saccharimonadales | JACDFO01           | JACDFO01          |                               |
| GCA_001897305.1_ASM189730v1                            | annotated species | cluster109 |            | Patescibacteria | Saccharimonadia | Saccharimonadales | UBA1547            | UBA6175           | UBA6175 sp001897305           |
| GCA_017307155.1_ASM1730715v1                           | annotated species | cluster109 | cluster109 | Patescibacteria | Saccharimonadia | Saccharimonadales | UBA1547            | UBA6175           | UBA6175 sp001897305           |
| GCA_001897295.1_ASM189729v1                            | annotated species | cluster110 | cluster110 | Patescibacteria | Saccharimonadia | Saccharimonadales | UBA1547            | UBA6175           | UBA6175 sp001897295           |
| GCA_946480535.1_SRR14536364_bin.32_metawrap_v1.3.0_MAG | novel species     | cluster111 | cluster111 | Patescibacteria | Saccharimonadia | Saccharimonadales | UBA1547            | UBA6175           |                               |
| GCA_025349965.1_ASM2534996v1                           | novel species     | cluster112 | cluster112 | Patescibacteria | Saccharimonadia | Saccharimonadales | UBA1547            | UBA6175           |                               |
| GCA_016866755.1_JGI_2017-08-21                         | annotated species | cluster113 | cluster113 | Patescibacteria | Saccharimonadia | Saccharimonadales | UBA1547            | UBA6175           |                               |
| GCA_945873065.1_SRR15732359_bin.18_metaWRAP_v1.3_MAG   | novel species     | cluster114 | cluster114 | Patescibacteria | Saccharimonadia | Saccharimonadales | Nanosynbacteraceae | VGLK01            | VGLK01 sp016866755            |
| GCA_000392435.1_ASM39243v1                             | annotated species | cluster115 | cluster115 | Patescibacteria | Saccharimonadia | Saccharimonadales | Saccharimonadaceae | Saccharimonas     | Saccharimonas aalborgensis    |
| GCA_002322785.1_ASM232278v1                            | annotated species | cluster115 |            | Patescibacteria | Saccharimonadia | Saccharimonadales | Saccharimonadaceae | Saccharimonas     | Saccharimonas aalborgensis    |
| GCA_002337155.1_ASM233715v1                            | annotated species | cluster115 |            | Patescibacteria | Saccharimonadia | Saccharimonadales | Saccharimonadaceae | Saccharimonas     | Saccharimonas aalborgensis    |
| GCA_016699065.1_ASM1669906v1                           | annotated species | cluster115 |            | Patescibacteria | Saccharimonadia | Saccharimonadales | Saccharimonadaceae | Saccharimonas     | Saccharimonas aalborgensis    |
| GCA_016700355.1_ASM1670035v1                           | annotated species | cluster115 |            | Patescibacteria | Saccharimonadia | Saccharimonadales | Saccharimonadaceae | Saccharimonas     | Saccharimonas aalborgensis    |
| GCA_016700395.1_ASM1670039v1                           | annotated species | cluster115 |            | Patescibacteria | Saccharimonadia | Saccharimonadales | Saccharimonadaceae | Saccharimonas     | Saccharimonas aalborgensis    |
| GCA_016700015.1_ASM1670001v1                           | annotated species | cluster116 | cluster116 | Patescibacteria | Saccharimonadia | Saccharimonadales | Saccharimonadaceae | Saccharimonas     | Saccharimonas aalborgensis    |
| GCA_001873625.1_ASM187362v1                            | annotated species | cluster117 | cluster117 | Patescibacteria | Saccharimonadia | Saccharimonadales | UBA1547            | UBA1547           | UBA1547 sp001873625           |
| GCA_002323055.1_ASM232305v1                            | annotated species | cluster117 |            | Patescibacteria | Saccharimonadia | Saccharimonadales | UBA1547            | UBA1547           | UBA1547 sp001873625           |
| GCA_002788895.1_ASM278889v1                            | annotated species | cluster117 |            | Patescibacteria | Saccharimonadia | Saccharimonadales | UBA1547            | UBA1547           | UBA1547 sp001873625           |
| GCA_002792255.1_ASM279225v1                            | annotated species | cluster117 |            | Patescibacteria | Saccharimonadia | Saccharimonadales | UBA1547            | UBA1547           | UBA1547 sp001873625           |
| GCA_002793725.1_ASM279372v1                            | annotated species | cluster117 |            | Patescibacteria | Saccharimonadia | Saccharimonadales | UBA1547            | UBA1547           | UBA1547 sp001873625           |
| GCA_002795915.1_ASM279591v1                            | annotated species | cluster117 |            | Patescibacteria | Saccharimonadia | Saccharimonadales | UBA1547            | UBA1547           | UBA1547 sp001873625           |
| GCA_009994745.1_ASM999474v1                            | annotated species | cluster117 |            | Patescibacteria | Saccharimonadia | Saccharimonadales | UBA1547            | UBA1547           | UBA1547 sp001873625           |
| GCA_022736555.1_ASM2273655v1                           | novel species     | cluster118 | cluster118 | Patescibacteria | Saccharimonadia | Saccharimonadales | UBA1547            | UBA1547           |                               |
| GCA_943354985.1_Jr-19feb18-57                          | annotated species | cluster119 | cluster119 | Patescibacteria | Saccharimonadia | Saccharimonadales | UBA1547            | UBA1547           | UBA1547 sp903899655           |
| GCA_026395405.1_ASM2639540v1                           | novel species     | cluster120 | cluster120 | Patescibacteria | Saccharimonadia | Saccharimonadales | UBA1547            | UBA1547           |                               |
| GCA_002839415.1_ASM283941v1                            | annotated species | cluster121 | cluster121 | Patescibacteria | Saccharimonadia | Saccharimonadales | UBA1547            | UBA1547           | UBA1547 sp002839415           |
| GCA_016234585.1_ASM1623458v1                           | annotated species | cluster122 | cluster122 | Patescibacteria | Saccharimonadia | Saccharimonadales | UBA10212           | 21-14-0-10-47-8-A | 21-14-0-10-47-8-A sp016234585 |
| GCA_019662065.1_ASM1966206v1                           | novel genus       | cluster123 | cluster123 | Patescibacteria | Saccharimonadia | Saccharimonadales | UBA10212           |                   |                               |
| GCA_025449905.1_ASM2544990v1                           | novel species     | cluster124 | cluster124 | Patescibacteria | Saccharimonadia | Saccharimonadales | UBA10212_A         | 2-02-FULL-47-12   |                               |
| GCA_016187125.1_ASM1618712v1                           | annotated species | cluster125 | cluster125 | Patescibacteria | Saccharimonadia | Saccharimonadales | UBA10212           | JACPKF01          | JACPKF01 sp016187125          |
| GCA_016187175.1_ASM1618717v1                           | annotated species | cluster126 | cluster126 | Patescibacteria | Saccharimonadia | Saccharimonadales | UBA10212           | UBA6824           | UBA6824 sp016187175           |
| GCA_002413795.1_ASM241379v1                            | annotated species | cluster127 | cluster127 | Patescibacteria | Saccharimonadia | Saccharimonadales | UBA4665            | UBA5150           | UBA5150 sp002413795           |
| GCA_002452155.1_ASM245215v1                            | annotated species | cluster128 | cluster128 | Patescibacteria | Saccharimonadia | Saccharimonadales | UBA10212           | UBA6824           | UBA6824 sp002452155           |
| GCA_002337095.1_ASM233709v1                            | annotated species | cluster129 | cluster129 | Patescibacteria | Saccharimonadia | Saccharimonadales | Saccharimonadaceae | Saccharimonas     | Saccharimonas sp002337095     |
| GCA_027493025.1_ASM2749302v1                           | novel genus       | cluster130 | cluster130 | Patescibacteria | Saccharimonadia | Saccharimonadales | UBA5946            |                   |                               |
| GCA_009787015.1_ASM978701v1                            | annotated species | cluster131 |            | Patescibacteria | Saccharimonadia | Saccharimonadales | Nanoperiomorbaceae | WRGU01            | WRGU01 sp009787015            |
| GCA_009787245.1_ASM978724v1                            | annotated species | cluster131 | cluster131 | Patescibacteria | Saccharimonadia | Saccharimonadales | Nanoperiomorbaceae | WRGU01            | WRGU01 sp009787015            |

|                                                      |                   |            |            |                 |                 |                   |                    |                 |                             |
|------------------------------------------------------|-------------------|------------|------------|-----------------|-----------------|-------------------|--------------------|-----------------|-----------------------------|
| GCA_002441585.1_ASM244158v1                          | annotated species | cluster132 | cluster132 | Patescibacteria | Saccharimonadia | Saccharimonadales | UBA4665            | UBA6224         | UBA6224 sp002441585         |
| GCA_025928155.1_ASM2592815v1                         | novel genus       | cluster133 | cluster133 | Patescibacteria | Saccharimonadia | Saccharimonadales | UBA4665            |                 |                             |
| GCA_027492975.1_ASM2749297v1                         | novel species     | cluster134 | cluster134 | Patescibacteria | Saccharimonadia | Saccharimonadales | UBA5946            | RZYF01          |                             |
| GCA_009776375.1_ASM977637v1                          | annotated species | cluster135 | cluster135 | Patescibacteria | Saccharimonadia | Saccharimonadales | Nanoperiomorbaceae | WQXA01          | WQXA01 sp009776375          |
| GCA_009785095.1_ASM978509v1                          | annotated species | cluster136 | cluster136 | Patescibacteria | Saccharimonadia | Saccharimonadales | Nanoperiomorbaceae | WQXA01          | WQXA01 sp009785095          |
| R0170300133_tooth_RA.megahit.bin.60                  | novel species     | cluster137 | cluster137 | Patescibacteria | saccharimonadia | Saccharimonadales | Nanoperiomorbaceae | Nanoperiomorbus |                             |
| SZAXPI018279-94_RA_dental.metaspades.bin.16          | novel species     | cluster138 | cluster138 | Patescibacteria | saccharimonadia | Saccharimonadales | Nanoperiomorbaceae | Nanoperiomorbus |                             |
| RSZAXPI002614-22_RA_dental.metaspades.bin.18         | novel species     | cluster139 | cluster139 | Patescibacteria | saccharimonadia | Saccharimonadales | Nanoperiomorbaceae | Nanoperiomorbus |                             |
| SZAXPI018096-17_RA_dental.metaspades.bin.67          | novel species     | cluster140 | cluster140 | Patescibacteria | saccharimonadia | Saccharimonadales | Nanoperiomorbaceae | Nanoperiomorbus |                             |
| R0170300120_tooth_RA.megahit.bin.52                  | novel species     | cluster141 | cluster141 | Patescibacteria | saccharimonadia | Saccharimonadales | Nanoperiomorbaceae | Nanoperiomorbus |                             |
| R0170300121_tooth_RA.megahit.bin.23                  | novel species     | cluster141 | cluster141 | Patescibacteria | saccharimonadia | Saccharimonadales | Nanoperiomorbaceae | Nanoperiomorbus |                             |
| R0170300302_tooth_RAH.megahit.bin.56                 | novel species     | cluster141 | cluster141 | Patescibacteria | saccharimonadia | Saccharimonadales | Nanoperiomorbaceae | Nanoperiomorbus |                             |
| RSZAXPI002603-21_RA_dental.metaspades.bin.30         | novel species     | cluster142 | cluster142 | Patescibacteria | saccharimonadia | Saccharimonadales | Nanoperiomorbaceae | Nanoperiomorbus |                             |
| RSZAXPI002627-75_RA_dental.metaspades.bin.25         | novel species     | cluster142 | cluster142 | Patescibacteria | saccharimonadia | Saccharimonadales | Nanoperiomorbaceae | Nanoperiomorbus |                             |
| RSZAXPI002633-90_RA_dental.metaspades.bin.54         | novel species     | cluster142 | cluster142 | Patescibacteria | saccharimonadia | Saccharimonadales | Nanoperiomorbaceae | Nanoperiomorbus |                             |
| RSZAXPI002675-22_RA_dental.metaspades.bin.45         | novel species     | cluster142 | cluster142 | Patescibacteria | saccharimonadia | Saccharimonadales | Nanoperiomorbaceae | Nanoperiomorbus |                             |
| SZAXPI018097-18_RA_dental.metaspades.bin.87          | novel species     | cluster142 | cluster142 | Patescibacteria | saccharimonadia | Saccharimonadales | Nanoperiomorbaceae | Nanoperiomorbus |                             |
| SZAXPI018282-108_RA_dental.metaspades.bin.70         | novel species     | cluster142 | cluster142 | Patescibacteria | saccharimonadia | Saccharimonadales | Nanoperiomorbaceae | Nanoperiomorbus |                             |
| RSZYD18078111_A_saliva.metaspades.bin.26             | novel species     | cluster142 | cluster142 | Patescibacteria | saccharimonadia | Saccharimonadales | Nanoperiomorbaceae | Nanoperiomorbus |                             |
| R0170300110_tooth_RA.megahit.bin.49                  | novel species     | cluster142 | cluster142 | Patescibacteria | saccharimonadia | Saccharimonadales | Nanoperiomorbaceae | Nanoperiomorbus |                             |
| R0170300187_tooth_RA.megahit.bin.41                  | novel species     | cluster142 | cluster142 | Patescibacteria | saccharimonadia | Saccharimonadales | Nanoperiomorbaceae | Nanoperiomorbus |                             |
| R0170300203_tooth_RA.megahit.bin.29                  | novel species     | cluster142 | cluster142 | Patescibacteria | saccharimonadia | Saccharimonadales | Nanoperiomorbaceae | Nanoperiomorbus |                             |
| R0170300205_tooth_RA.megahit.bin.38                  | novel species     | cluster142 | cluster142 | Patescibacteria | saccharimonadia | Saccharimonadales | Nanoperiomorbaceae | Nanoperiomorbus |                             |
| R0170300206_tooth_RA.megahit.bin.6                   | novel species     | cluster142 | cluster142 | Patescibacteria | saccharimonadia | Saccharimonadales | Nanoperiomorbaceae | Nanoperiomorbus |                             |
| R0170300255_tooth_RAH.megahit.bin.7                  | novel species     | cluster142 | cluster142 | Patescibacteria | saccharimonadia | Saccharimonadales | Nanoperiomorbaceae | Nanoperiomorbus |                             |
| R0170300266_tooth_RAH.megahit.bin.24                 | novel species     | cluster142 | cluster142 | Patescibacteria | saccharimonadia | Saccharimonadales | Nanoperiomorbaceae | Nanoperiomorbus |                             |
| R0170300285_tooth_RAH.megahit.bin.21                 | novel species     | cluster142 | cluster142 | Patescibacteria | saccharimonadia | Saccharimonadales | Nanoperiomorbaceae | Nanoperiomorbus |                             |
| R0170300308_tooth_RAH.megahit.bin.62                 | novel species     | cluster142 | cluster142 | Patescibacteria | saccharimonadia | Saccharimonadales | Nanoperiomorbaceae | Nanoperiomorbus |                             |
| R0170300326_tooth_RA.megahit.bin.12                  | novel species     | cluster142 | cluster142 | Patescibacteria | saccharimonadia | Saccharimonadales | Nanoperiomorbaceae | Nanoperiomorbus |                             |
| R0170300355_saliva_RA.megahit.bin.8                  | novel species     | cluster143 | cluster143 | Patescibacteria | saccharimonadia | Saccharimonadales | Nanoperiomorbaceae | Nanoperiomorbus |                             |
| GCA_013333515.2_ASM1333351v2                         | annotated species | cluster144 | cluster144 | Patescibacteria | Saccharimonadia | Saccharimonadales | Nanoperiomorbaceae | Nanoperiomorbus | Nanoperiomorbus sp013333515 |
| GCA_905365345.1_ERZ1645002-mag-bin.1                 | annotated species | cluster145 | cluster145 | Patescibacteria | Saccharimonadia | Saccharimonadales | Nanoperiomorbaceae | Nanoperiomorbus | Nanoperiomorbus sp905365345 |
| GCA_947090635.1_SRR11749285_bin.3_metaWRAP_v1.3_MAG  | novel species     | cluster218 | cluster218 | Patescibacteria | Saccharimonadia | Saccharimonadales | Nanoperiomorbaceae | Nanoperiomorbus |                             |
| GCA_947253235.1_SRR17635697_bin.12_metaWRAP_v1.3_MAG | novel species     | cluster218 | cluster218 | Patescibacteria | Saccharimonadia | Saccharimonadales | Nanoperiomorbaceae | Nanoperiomorbus |                             |
| GCA_004136275.1_ASM413627v1                          | annotated species | cluster219 | cluster219 | Patescibacteria | Saccharimonadia | Saccharimonadales | Nanoperiomorbaceae | Nanoperiomorbus | Nanoperiomorbus sp004136275 |
| GCA_946890805.1_SRR12830918_bin.6_metaWRAP_v1.3_MAG  | annotated species | cluster219 | cluster219 | Patescibacteria | Saccharimonadia | Saccharimonadales | Nanoperiomorbaceae | Nanoperiomorbus | Nanoperiomorbus sp004136275 |
| GCA_946890675.1_ERR9530663_bin.14_metaWRAP_v1.3_MAG  | annotated species | cluster220 | cluster220 | Patescibacteria | Saccharimonadia | Saccharimonadales | Nanoperiomorbaceae | Nanoperiomorbus | Nanoperiomorbus sp004136275 |
| GCA_946890795.1_SRR12830924_bin.6_metaWRAP_v1.3_MAG  | annotated species | cluster220 | cluster220 | Patescibacteria | Saccharimonadia | Saccharimonadales | Nanoperiomorbaceae | Nanoperiomorbus | Nanoperiomorbus sp004136275 |
| GCA_946998385.1_SRR16916860_bin.6_metaWRAP_v1.3_MAG  | annotated species | cluster220 | cluster220 | Patescibacteria | Saccharimonadia | Saccharimonadales | Nanoperiomorbaceae | Nanoperiomorbus | Nanoperiomorbus sp004136275 |
| GCA_947253565.1_SRR17635649_bin.4_metaWRAP_v1.3_MAG  | annotated species | cluster220 | cluster220 | Patescibacteria | Saccharimonadia | Saccharimonadales | Nanoperiomorbaceae | Nanoperiomorbus | Nanoperiomorbus sp004136275 |
| GCA_947253955.1_SRR17635595_bin.5_metaWRAP_v1.3_MAG  | novel species     | cluster220 | cluster220 | Patescibacteria | Saccharimonadia | Saccharimonadales | Nanoperiomorbaceae | Nanoperiomorbus |                             |
| GCA_946997535.1_SRR16916865_bin.12_metaWRAP_v1.3_MAG | novel species     | cluster221 | cluster221 | Patescibacteria | Saccharimonadia | Saccharimonadales | Nanoperiomorbaceae | Nanoperiomorbus |                             |
| GCA_947253945.1_SRR17635701_bin.9_metaWRAP_v1.3_MAG  | novel species     | cluster222 | cluster222 | Patescibacteria | Saccharimonadia | Saccharimonadales | Nanoperiomorbaceae | Nanoperiomorbus |                             |
| GCA_009783235.1_ASM978323v1                          | annotated species | cluster223 | cluster223 | Patescibacteria | Saccharimonadia | Saccharimonadales | Nanoperiomorbaceae | WRHN01          | WRHN01 sp009783235          |
| GCA_016699895.1_ASM1669989v1                         | annotated species | cluster224 | cluster224 | Patescibacteria | Saccharimonadia | Saccharimonadales | Nanoperiomorbaceae | GCA-016699895   | GCA-016699895 sp016699895   |
| GCA_027492735.1_ASM2749273v1                         | novel species     | cluster225 | cluster225 | Patescibacteria | Saccharimonadia | Saccharimonadales | Nanoperiomorbaceae | GCA-016699895   |                             |
| GCA_002313515.1_ASM231351v1                          | annotated species | cluster226 | cluster226 | Patescibacteria | Saccharimonadia | Saccharimonadales | Nanoperiomorbaceae | Nanoperiomorbus | Nanoperiomorbus sp002313515 |
| GCA_002437225.1_ASM243722v1                          | annotated species | cluster226 | cluster226 | Patescibacteria | Saccharimonadia | Saccharimonadales | Nanoperiomorbaceae | Nanoperiomorbus | Nanoperiomorbus sp002313515 |
| GCA_902461855.1_UHGG-TPA_MGYG-HGUT-00376             | novel species     | cluster227 | cluster227 | Patescibacteria | Saccharimonadia | Saccharimonadales | Nanoperiomorbaceae | Nanoperiomorbus |                             |
| GCA_934725355.1_ERR7738173_bin.40                    | novel species     | cluster228 | cluster228 | Patescibacteria | Saccharimonadia | Saccharimonadales | Nanoperiomorbaceae | Nanoperiomorbus |                             |
| GCA_013333595.2_ASM1333359v2                         | annotated species | cluster229 | cluster229 | Patescibacteria | Saccharimonadia | Saccharimonadales | Nanoperiomorbaceae | Nanoperiomorbus |                             |
| SRR8114033.metaspades.bin.42                         | annotated species | cluster229 | cluster229 | Patescibacteria | saccharimonadia | Saccharimonadales | UBA10027           | SDRW01          | SDRW01 sp013333595          |
| RSZAXPI002471-106_2_RAH_saliva.metaspades.bin.25     | annotated species | cluster229 | cluster229 | Patescibacteria | saccharimonadia | Saccharimonadales | UBA10027           | SDRW01          | SDRW01 sp013333595          |
| SZAXPI018357-22_RA_saliva.metaspades.bin.71          | novel species     | cluster230 | cluster230 | Patescibacteria | saccharimonadia | Saccharimonadales | UBA10027           | SDRW01          | SDRW01 sp013333595          |
| RSZAXPI002609-25_RA_dental.metaspades.bin.20         | novel species     | cluster231 | cluster231 | Patescibacteria | saccharimonadia | Saccharimonadales | Saccharimonadaceae | Saccharimonas   |                             |
| R0170300114_tooth_RA.megahit.bin.56                  | novel species     | cluster231 | cluster231 | Patescibacteria | saccharimonadia | Saccharimonadales | Saccharimonadaceae | Saccharimonas   |                             |
| R0170300295_tooth_RAH.megahit.bin.55                 | novel species     | cluster231 | cluster231 | Patescibacteria | saccharimonadia | Saccharimonadales | Saccharimonadaceae | Saccharimonas   |                             |
| R0170300137_tooth_RA.megahit.bin.43                  | novel species     | cluster232 | cluster232 | Patescibacteria | saccharimonadia | Saccharimonadales | Saccharimonadaceae | Saccharimonas   |                             |
| R0170300252_tooth_RAH.megahit.bin.91                 | novel species     | cluster232 | cluster232 | Patescibacteria | saccharimonadia | Saccharimonadales | Saccharimonadaceae | Saccharimonas   |                             |
| R0170300319_tooth_RAH.megahit.bin.124                | novel species     | cluster233 | cluster233 | Patescibacteria | saccharimonadia | Saccharimonadales | Saccharimonadaceae | Saccharimonas   |                             |
| GCA_015257665.1_ASM1525766v1                         | annotated species | cluster234 | cluster234 | Patescibacteria | Saccharimonadia | Saccharimonadales | Saccharimonadaceae | Saccharimonas   | Saccharimonas sp015257665   |
| GCA_927911635.1_ERR3827207_bin.3_metaWRAP_v1.1_MAG   | annotated species | cluster234 | cluster234 | Patescibacteria | Saccharimonadia | Saccharimonadales | Saccharimonadaceae | Saccharimonas   | Saccharimonas sp015257665   |
| RSZAXPI002311-20_RAH_dental.metaspades.bin.31        | annotated species | cluster235 | cluster235 | Patescibacteria | saccharimonadia | Saccharimonadales | Saccharimonadaceae | Saccharimonas   | Saccharimonas sp015257665   |
| R0170300253_tooth_RAH.megahit.bin.13                 | annotated species | cluster235 | cluster235 | Patescibacteria | saccharimonadia | Saccharimonadales | Saccharimonadaceae | Saccharimonas   | Saccharimonas sp015257665   |
| R0170300257_tooth_RAH.megahit.bin.108                | annotated species | cluster235 | cluster235 | Patescibacteria | saccharimonadia | Saccharimonadales | Saccharimonadaceae | Saccharimonas   | Saccharimonas sp015257665   |
| RSZAXPI002318-27_RAH_dental.metaspades.bin.13        | novel species     | cluster235 | cluster235 | Patescibacteria | saccharimonadia | Saccharimonadales | Saccharimonadaceae | Saccharimonas   |                             |
| RSZAXPI002321-33_RAH_dental.metaspades.bin.23        | novel species     | cluster235 | cluster235 | Patescibacteria | saccharimonadia | Saccharimonadales | Saccharimonadaceae | Saccharimonas   |                             |
| RSZAXPI002330-47_RAH_dental.metaspades.bin.66        | novel species     | cluster235 | cluster235 | Patescibacteria | saccharimonadia | Saccharimonadales | Saccharimonadaceae | Saccharimonas   |                             |
| RSZAXPI002636-95_RA_dental.metaspades.bin.34         | novel species     | cluster235 | cluster235 | Patescibacteria | saccharimonadia | Saccharimonadales | Saccharimonadaceae | Saccharimonas   |                             |
| SZAXPI018102-23_RA_dental.metaspades.bin.20          | novel species     | cluster235 | cluster235 | Patescibacteria | saccharimonadia | Saccharimonadales | Saccharimonadaceae | Saccharimonas   |                             |
| SZAXPI018188-46_RA_dental.metaspades.bin.49          | novel species     | cluster235 | cluster235 | Patescibacteria | saccharimonadia | Saccharimonadales | Saccharimonadaceae | Saccharimonas   |                             |
| SZAXPI018280-95_RA_dental.metaspades.bin.20          | novel species     | cluster235 | cluster235 | Patescibacteria | saccharimonadia | Saccharimonadales | Saccharimonadaceae | Saccharimonas   |                             |



|                                                     |                   |            |                 |                 |                   |                    |                |                            |
|-----------------------------------------------------|-------------------|------------|-----------------|-----------------|-------------------|--------------------|----------------|----------------------------|
| SZAXPI018285-113_RA_dental.metaspades.bin.57        | novel species     | cluster235 | Patescibacteria | saccharimonadia | Saccharimonadales | Saccharimonadaceae | Saccharimonas  |                            |
| SZAXPI018315-17_RA_dental.metaspades.bin.12         | novel species     | cluster235 | Patescibacteria | saccharimonadia | Saccharimonadales | Saccharimonadaceae | Saccharimonas  |                            |
| R0170300135_tooth_RA.megahit.bin.82                 | novel species     | cluster235 | Patescibacteria | saccharimonadia | Saccharimonadales | Saccharimonadaceae | Saccharimonas  |                            |
| R0170300271_tooth_RAH.megahit.bin.97                | novel species     | cluster235 | Patescibacteria | saccharimonadia | Saccharimonadales | Saccharimonadaceae | Saccharimonas  |                            |
| R0170300285_tooth_RAH.megahit.bin.82                | novel species     | cluster235 | Patescibacteria | saccharimonadia | Saccharimonadales | Saccharimonadaceae | Saccharimonas  |                            |
| R0170300299_tooth_RAH.megahit.bin.100               | novel species     | cluster235 | Patescibacteria | saccharimonadia | Saccharimonadales | Saccharimonadaceae | Saccharimonas  |                            |
| R0170300302_tooth_RAH.megahit.bin.78                | novel species     | cluster235 | Patescibacteria | saccharimonadia | Saccharimonadales | Saccharimonadaceae | Saccharimonas  |                            |
| RSZAXPI002653-13_RA_saliva.metaspades.bin.41        | novel species     | cluster236 | Patescibacteria | saccharimonadia | Saccharimonadales | Saccharimonadaceae | Saccharimonas  |                            |
| SZAXPI018187-45_RA_dental.metaspades.bin.28         | novel species     | cluster236 | Patescibacteria | saccharimonadia | Saccharimonadales | Saccharimonadaceae | Saccharimonas  |                            |
| RDPYD18300192_A_saliva.metaspades.bin.52            | novel species     | cluster236 | Patescibacteria | saccharimonadia | Saccharimonadales | Saccharimonadaceae | Saccharimonas  | cluster236                 |
| RDPYD18300405_A_saliva.metaspades.bin.82            | novel species     | cluster236 | Patescibacteria | saccharimonadia | Saccharimonadales | Saccharimonadaceae | Saccharimonas  |                            |
| RSZYD18078042_A_saliva.metaspades.bin.39            | novel species     | cluster236 | Patescibacteria | saccharimonadia | Saccharimonadales | Saccharimonadaceae | Saccharimonas  |                            |
| R0170300160_tooth_RA.megahit.bin.83                 | novel species     | cluster236 | Patescibacteria | saccharimonadia | Saccharimonadales | Saccharimonadaceae | Saccharimonas  |                            |
| R0170300241_tooth_RAH.megahit.bin.28                | novel species     | cluster236 | Patescibacteria | saccharimonadia | Saccharimonadales | Saccharimonadaceae | Saccharimonas  |                            |
| R0170300147_tooth_RA.megahit.bin.4                  | novel species     | cluster237 | Patescibacteria | saccharimonadia | Saccharimonadales | Saccharimonadaceae | Saccharimonas  | cluster237                 |
| SZAXPI018318-20_RA_dental.metaspades.bin.6          | novel species     | cluster238 | Patescibacteria | saccharimonadia | Saccharimonadales | Saccharimonadaceae | Saccharimonas  | cluster238                 |
| R0170300258_tooth_RAH.megahit.bin.41                | novel species     | cluster239 | Patescibacteria | saccharimonadia | Saccharimonadales | Saccharimonadaceae | Saccharimonas  | cluster239                 |
| GCA_004100265.1_ASM410026v1                         | annotated species | cluster264 | Patescibacteria | Saccharimonadia | Saccharimonadales | AMD01              | AMD01          | AMD01 sp004100265          |
| GCA_016176605.1_ASM1617660v1                        | annotated species | cluster265 | Patescibacteria | Saccharimonadia | Saccharimonadales | UBA10212           | UBA6824        | UBA6824 sp016176605        |
| GCA_018062805.1_ASM1806280v1                        | annotated species | cluster266 | Patescibacteria | Saccharimonadia | Saccharimonadales | CAIOMD01           | JAGORN01       | JAGORN01 sp018062805       |
| GCA_020428005.1_ASM2042800v1                        | novel genus       | cluster267 | Patescibacteria | Saccharimonadia | Saccharimonadales | SLHW01             |                |                            |
| GCA_007131065.1_ASM713106v1                         | annotated species | cluster268 | Patescibacteria | Saccharimonadia | Saccharimonadales | QS-5-54-17         | SLRF01         | SLRF01 sp007131065         |
| RSZAXPI002313-22_RAH_dental.metaspades.bin.34       | novel family      | cluster269 | Patescibacteria | saccharimonadia | Saccharimonadales |                    |                |                            |
| RSZAXPI002465-98_2_RAH_saliva.metaspades.bin.9      | novel family      | cluster269 | Patescibacteria | saccharimonadia | Saccharimonadales |                    |                |                            |
| SZAXPI018103-24_RA_dental.metaspades.bin.40         | novel family      | cluster269 | Patescibacteria | saccharimonadia | Saccharimonadales |                    |                |                            |
| RSZYD18187059_A_saliva.metaspades.bin.27            | novel family      | cluster269 | Patescibacteria | saccharimonadia | Saccharimonadales |                    |                |                            |
| R0170300213_tooth_RA.megahit.bin.11                 | novel family      | cluster269 | Patescibacteria | saccharimonadia | Saccharimonadales |                    |                |                            |
| R0170300248_tooth_RAH.megahit.bin.109               | novel family      | cluster269 | Patescibacteria | saccharimonadia | Saccharimonadales |                    |                | cluster269                 |
| R0170300249_tooth_RAH.megahit.bin.28                | novel family      | cluster269 | Patescibacteria | saccharimonadia | Saccharimonadales |                    |                |                            |
| R0170300303_tooth_RAH.megahit.bin.44                | novel family      | cluster269 | Patescibacteria | saccharimonadia | Saccharimonadales |                    |                |                            |
| SZAXPI018312-14_RA_dental.metaspades.bin.67         | novel family      | cluster270 | Patescibacteria | saccharimonadia | Saccharimonadales |                    |                | cluster270                 |
| RDPYD18300183_A_saliva.metaspades.bin.81            | novel family      | cluster270 | Patescibacteria | saccharimonadia | Saccharimonadales |                    |                |                            |
| R0170300217_tooth_RA.megahit.bin.23                 | novel family      | cluster271 | Patescibacteria | saccharimonadia | Saccharimonadales |                    |                | cluster271                 |
| R0170300306_tooth_RAH.megahit.bin.102               | novel family      | cluster271 | Patescibacteria | saccharimonadia | Saccharimonadales |                    |                |                            |
| GCA_947097085.1_SRR8786267_bin.10_metaWRAP_v1.3_MAG | novel family      | cluster272 | Patescibacteria | Saccharimonadia | Saccharimonadales |                    |                | cluster272                 |
| R0170300279_tooth_RAH.megahit.bin.93                | novel family      | cluster273 | Patescibacteria | saccharimonadia | Saccharimonadales |                    |                | cluster273                 |
| R0170300162_tooth_RA.megahit.bin.4                  | novel family      | cluster274 | Patescibacteria | saccharimonadia | Saccharimonadales |                    |                | cluster274                 |
| GCA_004151455.1_ASM415145v1                         | annotated species | cluster275 | Patescibacteria | Saccharimonadia | Saccharimonadales |                    |                |                            |
| RDPYD18300323_A_saliva.metaspades.bin.46            | annotated species | cluster275 | Patescibacteria | saccharimonadia | Saccharimonadales | Nanogingivalaceae  | Nanogingivalis | Nanogingivalis gingivitus  |
| RSZYD18078234_A_saliva.metaspades.bin.10            | annotated species | cluster275 | Patescibacteria | saccharimonadia | Saccharimonadales | Nanogingivalaceae  | Nanogingivalis | Nanogingivalis gingivitus  |
| RSZYD18078748_A_saliva.metaspades.bin.42            | annotated species | cluster275 | Patescibacteria | saccharimonadia | Saccharimonadales | Nanogingivalaceae  | Nanogingivalis | Nanogingivalis gingivitus  |
| RSZYD18187216_A_saliva.metaspades.bin.13            | annotated species | cluster275 | Patescibacteria | saccharimonadia | Saccharimonadales | Nanogingivalaceae  | Nanogingivalis | Nanogingivalis gingivitus  |
| RSZYD18187458_A_saliva.metaspades.bin.36            | annotated species | cluster275 | Patescibacteria | saccharimonadia | Saccharimonadales | Nanogingivalaceae  | Nanogingivalis | Nanogingivalis gingivitus  |
| RDPYD18098326_A_saliva.metaspades.bin.7             | annotated species | cluster275 | Patescibacteria | Saccharimonadia | Saccharimonadales | Nanogingivalaceae  | Nanogingivalis | Nanogingivalis gingivitus  |
| RDPYD18098375_A_saliva.metaspades.bin.22            | annotated species | cluster275 | Patescibacteria | Saccharimonadia | Saccharimonadales | Nanogingivalaceae  | Nanogingivalis | Nanogingivalis gingivitus  |
| RDPYD18098936_A_saliva.metaspades.bin.10            | annotated species | cluster275 | Patescibacteria | Saccharimonadia | Saccharimonadales | Nanogingivalaceae  | Nanogingivalis | Nanogingivalis gingivitus  |
| RDPYD18201938_A_saliva.metaspades.bin.59            | annotated species | cluster275 | Patescibacteria | Saccharimonadia | Saccharimonadales | Nanogingivalaceae  | Nanogingivalis | Nanogingivalis gingivitus  |
| RSZAXPI002305-14_RAH_dental.metaspades.bin.61       | novel species     | cluster276 | Patescibacteria | saccharimonadia | Saccharimonadales | Nanogingivalaceae  | Nanogingivalis |                            |
| RSZAXPI002331-56_RAH_dental.metaspades.bin.80       | novel species     | cluster276 | Patescibacteria | saccharimonadia | Saccharimonadales | Nanogingivalaceae  | Nanogingivalis |                            |
| SZAXPI018286-123_RA_dental.metaspades.bin.45        | novel species     | cluster276 | Patescibacteria | saccharimonadia | Saccharimonadales | Nanogingivalaceae  | Nanogingivalis | cluster276                 |
| SZAXPI018315-17_RA_dental.metaspades.bin.21         | novel species     | cluster276 | Patescibacteria | saccharimonadia | Saccharimonadales | Nanogingivalaceae  | Nanogingivalis |                            |
| SZAXPI018484-16_RA_saliva.metaspades.bin.36         | novel species     | cluster276 | Patescibacteria | saccharimonadia | Saccharimonadales | Nanogingivalaceae  | Nanogingivalis |                            |
| RSZAXPI002314-23_RAH_dental.metaspades.bin.46       | novel species     | cluster277 | Patescibacteria | saccharimonadia | Saccharimonadales | Nanogingivalaceae  | Nanogingivalis |                            |
| R0170300119_tooth_RA.megahit.bin.12                 | novel species     | cluster277 | Patescibacteria | saccharimonadia | Saccharimonadales | Nanogingivalaceae  | Nanogingivalis | cluster277                 |
| SZAXPI018317-19_RA_dental.metaspades.bin.69         | novel species     | cluster278 | Patescibacteria | saccharimonadia | Saccharimonadales | Nanogingivalaceae  | Nanogingivalis | cluster278                 |
| RDPYD18300091_A_saliva.metaspades.bin.39            | novel species     | cluster279 | Patescibacteria | saccharimonadia | Saccharimonadales | Nanogingivalaceae  | Nanogingivalis | cluster279                 |
| RSZYD18078482_A_saliva.metaspades.bin.17            | novel species     | cluster279 | Patescibacteria | saccharimonadia | Saccharimonadales | Nanogingivalaceae  | Nanogingivalis |                            |
| RDPYD18088805_A_saliva.metaspades.bin.25            | novel species     | cluster280 | Patescibacteria | saccharimonadia | Saccharimonadales | Nanogingivalaceae  | Nanogingivalis | cluster280                 |
| RSZYD18187023_A_saliva.metaspades.bin.32            | novel species     | cluster280 | Patescibacteria | saccharimonadia | Saccharimonadales | Nanogingivalaceae  | Nanogingivalis |                            |
| GCA_015257785.3_ASM1525778v3                        | annotated species | cluster281 | Patescibacteria | Saccharimonadia | Saccharimonadales | Nanogingivalaceae  | Nanogingivalis | Nanogingivalis sp015257795 |
| GCA_015257795.3_ASM1525779v3                        | annotated species | cluster281 | Patescibacteria | Saccharimonadia | Saccharimonadales | Nanogingivalaceae  | Nanogingivalis | Nanogingivalis sp015257795 |
| GCA_015257815.1_ASM1525781v1                        | annotated species | cluster281 | Patescibacteria | Saccharimonadia | Saccharimonadales | Nanogingivalaceae  | Nanogingivalis | Nanogingivalis sp015257795 |
| SRR6748223.metaspades.bin.6                         | annotated species | cluster281 | Patescibacteria | saccharimonadia | Saccharimonadales | Nanogingivalaceae  | Nanogingivalis | Nanogingivalis sp015257795 |
| SRR8114052.metaspades.bin.61                        | annotated species | cluster281 | Patescibacteria | saccharimonadia | Saccharimonadales | Nanogingivalaceae  | Nanogingivalis | Nanogingivalis sp015257795 |
| RSZAXPI002306-15_2_RAH_saliva.metaspades.bin.36     | annotated species | cluster281 | Patescibacteria | saccharimonadia | Saccharimonadales | Nanogingivalaceae  | Nanogingivalis | Nanogingivalis sp015257795 |
| RSZAXPI002470-105_2_RAH_saliva.metaspades.bin.33    | annotated species | cluster281 | Patescibacteria | saccharimonadia | Saccharimonadales | Nanogingivalaceae  | Nanogingivalis | Nanogingivalis sp015257795 |
| RSZAXPI002470-105_RAH_saliva.metaspades.bin.10      | annotated species | cluster281 | Patescibacteria | saccharimonadia | Saccharimonadales | Nanogingivalaceae  | Nanogingivalis | Nanogingivalis sp015257795 |
| SZAXPI018354-19_RA_saliva.metaspades.bin.46         | annotated species | cluster281 | Patescibacteria | saccharimonadia | Saccharimonadales | Nanogingivalaceae  | Nanogingivalis | Nanogingivalis sp015257795 |
| SZAXPI018397-37_RA_saliva.metaspades.bin.28         | annotated species | cluster281 | Patescibacteria | saccharimonadia | Saccharimonadales | Nanogingivalaceae  | Nanogingivalis | Nanogingivalis sp015257795 |
| SZAXPI018433-84_RA_saliva.metaspades.bin.87         | annotated species | cluster281 | Patescibacteria | saccharimonadia | Saccharimonadales | Nanogingivalaceae  | Nanogingivalis | Nanogingivalis sp015257795 |
| SZAXPI018436-90_RA_saliva.metaspades.bin.9          | annotated species | cluster281 | Patescibacteria | saccharimonadia | Saccharimonadales | Nanogingivalaceae  | Nanogingivalis | Nanogingivalis sp015257795 |
| SZAXPI018490-22_RA_saliva.metaspades.bin.30         | annotated species | cluster281 | Patescibacteria | saccharimonadia | Saccharimonadales | Nanogingivalaceae  | Nanogingivalis | Nanogingivalis sp015257795 |











|                                                      |                   |            |            |                 |                 |                   |                  |               |                           |
|------------------------------------------------------|-------------------|------------|------------|-----------------|-----------------|-------------------|------------------|---------------|---------------------------|
| GCA_947303945.1_SRR10912540_bin.27_metaWRAP_v1.3_MAG | novel species     | cluster329 | cluster329 | Patescibacteria | Saccharimonadia | Saccharimonadales | Nanosyncoccaceae | UBA2834       |                           |
| GCA_002371895.1_ASM237189v1                          | annotated species | cluster330 |            | Patescibacteria | Saccharimonadia | Saccharimonadales | Nanosyncoccaceae | UBA2834       | UBA2834 sp002371895       |
| GCA_946619905.1_SRR873600_bin.141_metaWRAP_v1.3_MAG  | annotated species | cluster330 | cluster330 | Patescibacteria | Saccharimonadia | Saccharimonadales | Nanosyncoccaceae | UBA2834       | UBA2834 sp002371895       |
| GCA_017541245.1_ASM1754124v1                         | novel species     | cluster331 | cluster331 | Patescibacteria | Saccharimonadia | Saccharimonadales | Nanosyncoccaceae | UBA2834       |                           |
| GCA_017437945.1_ASM1743794v1                         | annotated species | cluster332 | cluster332 | Patescibacteria | Saccharimonadia | Saccharimonadales | Nanosyncoccaceae | UBA2834       | UBA2834 sp017437945       |
| GCA_017524405.1_ASM1752440v1                         | annotated species | cluster333 | cluster333 | Patescibacteria | Saccharimonadia | Saccharimonadales | Nanosyncoccaceae | UBA2834       | UBA2834 sp017524405       |
| GCA_017540725.1_ASM1754072v1                         | annotated species | cluster333 |            | Patescibacteria | Saccharimonadia | Saccharimonadales | Nanosyncoccaceae | UBA2834       | UBA2834 sp017524405       |
| GCA_946406645.1_SRR12081302_bin.54_metaWRAP_v1.3_MAG | novel species     | cluster334 | cluster334 | Patescibacteria | Saccharimonadia | Saccharimonadales | Nanosyncoccaceae | UBA2834       |                           |
| GCA_946404545.1_SRR12081298_bin.7_metaWRAP_v1.3_MAG  | annotated species | cluster335 | cluster335 | Patescibacteria | Saccharimonadia | Saccharimonadales | Nanosyncoccaceae | UBA2834       | UBA2834 sp017548735       |
| GCA_017514805.1_ASM1751480v1                         | annotated species | cluster336 |            | Patescibacteria | Saccharimonadia | Saccharimonadales | Nanosyncoccaceae | UBA2834       | UBA2834 sp017514805       |
| GCA_946407955.1_SRR12081296_bin.80_metaWRAP_v1.3_MAG | annotated species | cluster336 | cluster336 | Patescibacteria | Saccharimonadia | Saccharimonadales | Nanosyncoccaceae | UBA2834       | UBA2834 sp017514805       |
| GCA_017510385.1_ASM1751038v1                         | annotated species | cluster337 | cluster337 | Patescibacteria | Saccharimonadia | Saccharimonadales | Nanosyncoccaceae | UBA2834       | UBA2834 sp017510385       |
| GCA_946624835.1_SRR873600_bin.13_metaWRAP_v1.3_MAG   | novel species     | cluster338 | cluster338 | Patescibacteria | Saccharimonadia | Saccharimonadales | Nanosyncoccaceae | UBA2834       |                           |
| GCA_017460065.1_ASM1746006v1                         | annotated species | cluster339 | cluster339 | Patescibacteria | Saccharimonadia | Saccharimonadales | Nanosyncoccaceae | UBA2834       | UBA2834 sp017460065       |
| GCA_946408075.1_SRR12081296_bin.6_metaWRAP_v1.3_MAG  | novel species     | cluster340 | cluster340 | Patescibacteria | Saccharimonadia | Saccharimonadales | Nanosyncoccaceae | UBA2834       |                           |
| GCA_017420225.1_ASM1742022v1                         | annotated species | cluster341 |            | Patescibacteria | Saccharimonadia | Saccharimonadales | Nanosyncoccaceae | UBA2834       | UBA2834 sp017430725       |
| GCA_017430725.1_ASM1743072v1                         | annotated species | cluster341 | cluster341 | Patescibacteria | Saccharimonadia | Saccharimonadales | Nanosyncoccaceae | UBA2834       | UBA2834 sp017430725       |
| GCA_017418275.1_ASM1741827v1                         | annotated species | cluster342 | cluster342 | Patescibacteria | Saccharimonadia | Saccharimonadales | Nanosyncoccaceae | UBA2834       | UBA2834 sp017418275       |
| GCA_946411665.1_SRR12081298_bin.32_metaWRAP_v1.3_MAG | annotated species | cluster342 |            | Patescibacteria | Saccharimonadia | Saccharimonadales | Nanosyncoccaceae | UBA2834       | UBA2834 sp017418275       |
| GCA_947304955.1_SRR10912542_bin.53_metaWRAP_v1.3_MAG | annotated species | cluster342 |            | Patescibacteria | Saccharimonadia | Saccharimonadales | Nanosyncoccaceae | UBA2834       | UBA2834 sp017418275       |
| GCA_017531585.1_ASM1753158v1                         | annotated species | cluster343 | cluster343 | Patescibacteria | Saccharimonadia | Saccharimonadales | Nanosyncoccaceae | UBA2834       | UBA2834 sp017531585       |
| GCA_946530965.1_SRR873598_bin.145_metaWRAP_v1.3_MAG  | novel species     | cluster344 | cluster344 | Patescibacteria | Saccharimonadia | Saccharimonadales | Nanosyncoccaceae | UBA2834       |                           |
| GCA_017506895.1_ASM1750689v1                         | annotated species | cluster345 | cluster345 | Patescibacteria | Saccharimonadia | Saccharimonadales | Nanosyncoccaceae | Nanosyncoccus | Nanosyncoccus sp017506895 |
| GCA_017510665.1_ASM1751066v1                         | novel species     | cluster346 | cluster346 | Patescibacteria | Saccharimonadia | Saccharimonadales | Nanosyncoccaceae | Nanosyncoccus |                           |
| GCA_017545525.1_ASM1754552v1                         | annotated species | cluster347 | cluster347 | Patescibacteria | Saccharimonadia | Saccharimonadales | Nanosyncoccaceae | Nanosyncoccus | Nanosyncoccus sp017545525 |
| GCA_017514145.1_ASM1751414v1                         | novel species     | cluster348 | cluster348 | Patescibacteria | Saccharimonadia | Saccharimonadales | Nanosyncoccaceae | Nanosyncoccus |                           |
| GCA_017404685.1_ASM1740468v1                         | annotated species | cluster349 | cluster349 | Patescibacteria | Saccharimonadia | Saccharimonadales | Nanosyncoccaceae | Nanosyncoccus | Nanosyncoccus sp017404685 |
| GCA_017511205.1_ASM1751120v1                         | annotated species | cluster350 | cluster350 | Patescibacteria | Saccharimonadia | Saccharimonadales | Nanosyncoccaceae | Nanosyncoccus | Nanosyncoccus sp017511205 |
| GCA_017514675.1_ASM1751467v1                         | annotated species | cluster351 | cluster351 | Patescibacteria | Saccharimonadia | Saccharimonadales | Nanosyncoccaceae | Nanosyncoccus | Nanosyncoccus sp017514675 |
| GCA_024697865.1_ASM2469786v1                         | novel species     | cluster352 | cluster352 | Patescibacteria | Saccharimonadia | Saccharimonadales | Nanosyncoccaceae | Nanosyncoccus |                           |
| GCA_017511965.1_ASM1751196v1                         | annotated species | cluster353 | cluster353 | Patescibacteria | Saccharimonadia | Saccharimonadales | Nanosyncoccaceae | Nanosyncoccus | Nanosyncoccus sp017511965 |
| GCA_002350545.1_ASM235054v1                          | annotated species | cluster354 |            | Patescibacteria | Saccharimonadia | Saccharimonadales | Nanosyncoccaceae | Nanosyncoccus | Nanosyncoccus sp002350545 |
| GCA_947168545.1_SRR8387715_bin.82_metaWRAP_v1.3_MAG  | annotated species | cluster355 | cluster355 | Patescibacteria | Saccharimonadia | Saccharimonadales | Nanosyncoccaceae | Nanosyncoccus | Nanosyncoccus sp002350545 |
| GCA_017431745.1_ASM1743174v1                         | annotated species | cluster356 | cluster356 | Patescibacteria | Saccharimonadia | Saccharimonadales | Nanosyncoccaceae | Nanosyncoccus | Nanosyncoccus sp017431745 |
| GCA_017536895.1_ASM1753689v1                         | annotated species | cluster357 | cluster357 | Patescibacteria | Saccharimonadia | Saccharimonadales | Nanosyncoccaceae | Nanosyncoccus | Nanosyncoccus sp017536895 |
| GCA_017406565.1_ASM1740656v1                         | annotated species | cluster358 | cluster358 | Patescibacteria | Saccharimonadia | Saccharimonadales | Nanosyncoccaceae | Nanosyncoccus | Nanosyncoccus sp017406565 |
| GCA_947165975.1_SRR8387714_bin.97_metaWRAP_v1.3_MAG  | novel species     | cluster359 | cluster359 | Patescibacteria | Saccharimonadia | Saccharimonadales | Nanosyncoccaceae | Nanosyncoccus |                           |
| GCA_946414465.1_SRR12081303_bin.63_metaWRAP_v1.3_MAG | novel species     | cluster360 | cluster360 | Patescibacteria | Saccharimonadia | Saccharimonadales | Nanosyncoccaceae | Nanosyncoccus | Nanosyncoccus sp017533605 |
| GCA_017533605.1_ASM1753360v1                         | annotated species | cluster361 | cluster361 | Patescibacteria | Saccharimonadia | Saccharimonadales | Nanosyncoccaceae | Nanosyncoccus | Nanosyncoccus sp017545505 |
| GCA_017545505.1_ASM1754550v1                         | annotated species | cluster362 | cluster362 | Patescibacteria | Saccharimonadia | Saccharimonadales | Nanosyncoccaceae | Nanosyncoccus | Nanosyncoccus sp016286785 |
| GCA_016286785.1_ASM1628678v1                         | annotated species | cluster363 | cluster363 | Patescibacteria | Saccharimonadia | Saccharimonadales | Nanosyncoccaceae | Nanosyncoccus | Nanosyncoccus sp016286785 |
| GCA_017510905.1_ASM1751090v1                         | novel species     | cluster364 | cluster364 | Patescibacteria | Saccharimonadia | Saccharimonadales | Nanosyncoccaceae | Nanosyncoccus |                           |
| GCA_947302355.1_SRR10912539_bin.48_metaWRAP_v1.3_MAG | novel species     | cluster365 |            | Patescibacteria | Saccharimonadia | Saccharimonadales | Nanosyncoccaceae | Nanosyncoccus | Nanosyncoccus sp017406775 |
| GCA_017404285.1_ASM1740428v1                         | annotated species | cluster366 | cluster366 | Patescibacteria | Saccharimonadia | Saccharimonadales | Nanosyncoccaceae | Nanosyncoccus | Nanosyncoccus sp017406775 |
| GCA_017406775.1_ASM1740677v1                         | annotated species | cluster367 | cluster367 | Patescibacteria | Saccharimonadia | Saccharimonadales | Nanosyncoccaceae | Nanosyncoccus | Nanosyncoccus sp017421685 |
| GCA_017421685.1_ASM1742168v1                         | annotated species | cluster368 | cluster368 | Patescibacteria | Saccharimonadia | Saccharimonadales | Nanosyncoccaceae | Nanosyncoccus | Nanosyncoccus sp002309075 |
| GCA_002309075.1_ASM230907v1                          | annotated species | cluster369 | cluster369 | Patescibacteria | Saccharimonadia | Saccharimonadales | Nanosyncoccaceae | Nanosyncoccus | Nanosyncoccus sp016280905 |
| GCA_016280905.1_ASM1628090v1                         | annotated species | cluster370 | cluster370 | Patescibacteria | Saccharimonadia | Saccharimonadales | Nanosyncoccaceae | Nanosyncoccus | Nanosyncoccus sp002371235 |
| GCA_002371235.1_ASM237123v1                          | annotated species | cluster371 | cluster371 | Patescibacteria | Saccharimonadia | Saccharimonadales | Nanosyncoccaceae | Nanosyncoccus | Nanosyncoccus sp017510425 |
| GCA_017510425.1_ASM1751042v1                         | annotated species | cluster372 | cluster372 | Patescibacteria | Saccharimonadia | Saccharimonadales | Nanosyncoccaceae | Nanosyncoccus | Nanosyncoccus sp017510075 |
| GCA_017510075.1_ASM1751007v1                         | novel species     | cluster373 | cluster373 | Patescibacteria | Saccharimonadia | Saccharimonadales | Nanosyncoccaceae | Nanosyncoccus |                           |
| GCA_946548715.1_SRR1222429_bin.13_metaWRAP_v1.3_MAG  | novel species     | cluster374 | cluster374 | Patescibacteria | Saccharimonadia | Saccharimonadales | Nanosyncoccaceae | Nanosyncoccus |                           |
| GCA_017459765.1_ASM1745976v1                         | novel species     | cluster375 | cluster375 | Patescibacteria | Saccharimonadia | Saccharimonadales | Nanosyncoccaceae | Nanosyncoccus | Nanosyncoccus sp017433855 |
| GCA_017510025.1_ASM1751002v1                         | annotated species | cluster376 | cluster376 | Patescibacteria | Saccharimonadia | Saccharimonadales | Nanosyncoccaceae | Nanosyncoccus | Nanosyncoccus sp017459705 |
| GCA_017433855.1_ASM1743385v1                         | annotated species | cluster377 | cluster377 | Patescibacteria | Saccharimonadia | Saccharimonadales | Nanosyncoccaceae | Nanosyncoccus |                           |
| GCA_017459705.1_ASM1745970v1                         | novel species     | cluster378 |            | Patescibacteria | Saccharimonadia | Saccharimonadales | Nanosyncoccaceae | Nanosyncoccus | Nanosyncoccus sp017613135 |
| GCA_017431085.1_ASM1743108v1                         | annotated species | cluster378 | cluster378 | Patescibacteria | Saccharimonadia | Saccharimonadales | Nanosyncoccaceae | Nanosyncoccus | Nanosyncoccus sp017613135 |
| GCA_017613135.1_ASM1761313v1                         | annotated species | cluster379 | cluster379 | Patescibacteria | Saccharimonadia | Saccharimonadales | Nanosyncoccaceae | Nanosyncoccus |                           |
| GCA_946404095.1_SRR12081303_bin.66_metaWRAP_v1.3_MAG | novel species     | cluster380 |            | Patescibacteria | Saccharimonadia | Saccharimonadales | Nanosyncoccaceae | Nanosyncoccus | Nanosyncoccus sp002393165 |
| GCA_946408595.1_SRR12081297_bin.13_metaWRAP_v1.3_MAG | annotated species | cluster381 | cluster381 | Patescibacteria | Saccharimonadia | Saccharimonadales | Nanosyncoccaceae | Nanosyncoccus | Nanosyncoccus sp002393165 |
| GCA_946626365.1_SRR873609_bin.132_metaWRAP_v1.3_MAG  | annotated species | cluster382 | cluster382 | Patescibacteria | Saccharimonadia | Saccharimonadales | Nanosyncoccaceae | Nanosyncoccus | Nanosyncoccus sp017962365 |
| GCA_947306835.1_SRR10912542_bin.23_metaWRAP_v1.3_MAG | annotated species | cluster383 | cluster383 | Patescibacteria | Saccharimonadia | Saccharimonadales | Nanosyncoccaceae | Nanosyncoccus | Nanosyncoccus sp017447485 |
| GCA_017962365.1_ASM1796236v1                         | annotated species | cluster384 | cluster384 | Patescibacteria | Saccharimonadia | Saccharimonadales | Nanosyncoccaceae | Nanosyncoccus | Nanosyncoccus sp017420185 |
| GCA_017447485.1_ASM1744748v1                         | novel species     | cluster385 | cluster385 | Patescibacteria | Saccharimonadia | Saccharimonadales | Nanosyncoccaceae | Nanosyncoccus | Nanosyncoccus sp017406905 |
| GCA_947303265.1_SRR10912539_bin.36_metaWRAP_v1.3_MAG | novel species     | cluster386 | cluster386 | Patescibacteria | Saccharimonadia | Saccharimonadales | Nanosyncoccaceae | Nanosyncoccus |                           |
| GCA_017512925.1_ASM1751292v1                         | novel species     | cluster387 | cluster387 | Patescibacteria | Saccharimonadia | Saccharimonadales | Nanosyncoccaceae | Nanosyncoccus |                           |
| GCA_017515785.1_ASM1751578v1                         | novel species     | cluster388 | cluster388 | Patescibacteria | Saccharimonadia | Saccharimonadales | Nanosyncoccaceae | Nanosyncoccus | Nanosyncoccus sp017537745 |
| GCA_017537745.1_ASM1753774v1                         | annotated species | cluster389 | cluster389 | Patescibacteria | Saccharimonadia | Saccharimonadales | Nanosyncoccaceae | Nanosyncoccus |                           |
| GCA_946414345.1_SRR12081302_bin.4_metaWRAP_v1.3_MAG  | novel species     | cluster390 | cluster390 | Patescibacteria | Saccharimonadia | Saccharimonadales | Nanosyncoccaceae | Nanosyncoccus | Nanosyncoccus sp017561575 |
| GCA_017561575.1_ASM1756157v1                         | annotated species | cluster390 | cluster390 | Patescibacteria | Saccharimonadia | Saccharimonadales | Nanosyncoccaceae | Nanosyncoccus | Nanosyncoccus sp017561575 |





|                                                       |                   |            |            |                 |                 |                   |                  |               |                           |
|-------------------------------------------------------|-------------------|------------|------------|-----------------|-----------------|-------------------|------------------|---------------|---------------------------|
| GCA_017432365.1_ASM1743236v1                          | annotated species | cluster445 | cluster445 | Patescibacteria | Saccharimonadia | Saccharimonadales | Nanosyncoccaceae | Nanosyncoccus | Nanosyncoccus sp017432365 |
| GCA_017482785.1_ASM1748278v1                          | novel species     | cluster446 | cluster446 | Patescibacteria | Saccharimonadia | Saccharimonadales | Nanosyncoccaceae | Nanosyncoccus |                           |
| GCA_017404845.1_ASM1740484v1                          | novel species     | cluster447 | cluster447 | Patescibacteria | Saccharimonadia | Saccharimonadales | Nanosyncoccaceae | Nanosyncoccus |                           |
| GCA_017512095.1_ASM1751209v1                          | annotated species | cluster448 | cluster448 | Patescibacteria | Saccharimonadia | Saccharimonadales | Nanosyncoccaceae | Nanosyncoccus | Nanosyncoccus sp017512095 |
| GCA_017515285.1_ASM1751528v1                          | annotated species | cluster449 | cluster449 | Patescibacteria | Saccharimonadia | Saccharimonadales | Nanosyncoccaceae | Nanosyncoccus | Nanosyncoccus sp017515285 |
| GCA_017514045.1_ASM1751404v1                          | annotated species | cluster450 | cluster450 | Patescibacteria | Saccharimonadia | Saccharimonadales | Nanosyncoccaceae | Nanosyncoccus | Nanosyncoccus sp017514045 |
| GCA_017552385.1_ASM1755238v1                          | annotated species | cluster451 | cluster451 | Patescibacteria | Saccharimonadia | Saccharimonadales | Nanosyncoccaceae | Nanosyncoccus | Nanosyncoccus sp017552385 |
| GCA_017513905.1_ASM1751390v1                          | annotated species | cluster452 | cluster452 | Patescibacteria | Saccharimonadia | Saccharimonadales | Nanosyncoccaceae | Nanosyncoccus | Nanosyncoccus sp017513905 |
| GCA_017460225.1_ASM1746022v1                          | annotated species | cluster453 | cluster453 | Patescibacteria | Saccharimonadia | Saccharimonadales | Nanosyncoccaceae | Nanosyncoccus | Nanosyncoccus sp017460225 |
| GCA_017431955.1_ASM1743195v1                          | annotated species | cluster454 | cluster454 | Patescibacteria | Saccharimonadia | Saccharimonadales | Nanosyncoccaceae | Nanosyncoccus | Nanosyncoccus sp017431955 |
| GCA_017510445.1_ASM1751044v1                          | annotated species | cluster455 | cluster455 | Patescibacteria | Saccharimonadia | Saccharimonadales | Nanosyncoccaceae | Nanosyncoccus | Nanosyncoccus sp017510445 |
| GCA_017651125.1_ASM1765112v1                          | novel species     | cluster456 | cluster456 | Patescibacteria | Saccharimonadia | Saccharimonadales | Nanosyncoccaceae | Nanosyncoccus |                           |
| GCA_024699125.1_ASM2469912v1                          | novel species     | cluster457 | cluster457 | Patescibacteria | Saccharimonadia | Saccharimonadales | Nanosyncoccaceae | Nanosyncoccus |                           |
| GCA_017556795.1_ASM1755679v1                          | annotated species | cluster458 | cluster458 | Patescibacteria | Saccharimonadia | Saccharimonadales | Nanosyncoccaceae | Nanosyncoccus | Nanosyncoccus sp017556795 |
| GCA_946405975.1_SRR12081303_bin.106_metaWRAP_v1.3_MAG | novel species     | cluster459 | cluster459 | Patescibacteria | Saccharimonadia | Saccharimonadales | Nanosyncoccaceae | Nanosyncoccus |                           |
| GCA_947302975.1_SRR10912535_bin.55_metaWRAP_v1.3_MAG  | novel species     | cluster460 | cluster460 | Patescibacteria | Saccharimonadia | Saccharimonadales | Nanosyncoccaceae | Nanosyncoccus |                           |
| GCA_017407085.1_ASM1740708v1                          | novel species     | cluster461 | cluster461 | Patescibacteria | Saccharimonadia | Saccharimonadales | Nanosyncoccaceae | Nanosyncoccus |                           |
| GCA_017509895.1_ASM1750989v1                          | annotated species | cluster462 | cluster462 | Patescibacteria | Saccharimonadia | Saccharimonadales | Nanosyncoccaceae | Nanosyncoccus | Nanosyncoccus sp017509895 |
| RSZAXPI002313-22_RAH_dental.metaspades.bin.48         | novel species     | cluster463 |            | Patescibacteria | Saccharimonadia | Saccharimonadales | Nanosyncoccaceae | Nanosyncoccus |                           |
| SZAXPI018406-56_RA_saliva.metaspades.bin.70           | novel species     | cluster463 | cluster463 | Patescibacteria | saccharimonadia | Saccharimonadales | Nanosyncoccaceae | Nanosyncoccus |                           |
| SZAXPI018453-13_RA_saliva.metaspades.bin.39           | novel species     | cluster463 |            | Patescibacteria | saccharimonadia | Saccharimonadales | Nanosyncoccaceae | Nanosyncoccus |                           |
| R0170300271_tooth_RAH.megahit.bin.84                  | novel species     | cluster463 |            | Patescibacteria | saccharimonadia | Saccharimonadales | Nanosyncoccaceae | Nanosyncoccus |                           |
| GCA_945872155.1_SRR15732359_bin.8_metaWRAP_v1.3_MAG   | novel species     | cluster464 | cluster464 | Patescibacteria | Saccharimonadia | Saccharimonadales | Nanosyncoccaceae | Nanosyncoccus |                           |
| GCA_017480095.1_ASM1748009v1                          | annotated species | cluster465 | cluster465 | Patescibacteria | Saccharimonadia | Saccharimonadales | Nanosyncoccaceae | Nanosyncoccus | Nanosyncoccus sp017480095 |
| GCA_017404725.1_ASM1740472v1                          | annotated species | cluster466 | cluster466 | Patescibacteria | Saccharimonadia | Saccharimonadales | Nanosyncoccaceae | Nanosyncoccus | Nanosyncoccus sp017404725 |
| GCA_017431465.1_ASM1743146v1                          | annotated species | cluster467 | cluster467 | Patescibacteria | Saccharimonadia | Saccharimonadales | Nanosyncoccaceae | Nanosyncoccus | Nanosyncoccus sp017431465 |
| GCA_017460165.1_ASM1746016v1                          | novel species     | cluster468 | cluster468 | Patescibacteria | Saccharimonadia | Saccharimonadales | Nanosyncoccaceae | Nanosyncoccus |                           |
| RSZAXPI002479-169_2_RAH_saliva.metaspades.bin.78      | novel species     | cluster469 | cluster469 | Patescibacteria | saccharimonadia | Saccharimonadales | Nanosyncoccaceae | Nanosyncoccus |                           |
| RSZAXPI002479-169_RAH_saliva.metaspades.bin.73        | novel species     | cluster469 |            | Patescibacteria | saccharimonadia | Saccharimonadales | Nanosyncoccaceae | Nanosyncoccus |                           |
| R0170300287_tooth_RAH.megahit.bin.150                 | novel species     | cluster470 | cluster470 | Patescibacteria | saccharimonadia | Saccharimonadales | Nanosyncoccaceae | Nanosyncoccus |                           |
| GCA_017432305.1_ASM1743230v1                          | annotated species | cluster471 | cluster471 | Patescibacteria | Saccharimonadia | Saccharimonadales | Nanosyncoccaceae | Nanosyncoccus | Nanosyncoccus sp017432305 |
| GCA_017480035.1_ASM1748003v1                          | annotated species | cluster472 | cluster472 | Patescibacteria | Saccharimonadia | Saccharimonadales | Nanosyncoccaceae | Nanosyncoccus | Nanosyncoccus sp017480035 |
| GCA_947304155.1_SRR10912535_bin.54_metaWRAP_v1.3_MAG  | novel species     | cluster473 | cluster473 | Patescibacteria | Saccharimonadia | Saccharimonadales | Nanosyncoccaceae | Nanosyncoccus |                           |
| GCA_017406985.1_ASM1740698v1                          | annotated species | cluster474 | cluster474 | Patescibacteria | Saccharimonadia | Saccharimonadales | Nanosyncoccaceae | Nanosyncoccus | Nanosyncoccus sp017406985 |
| GCA_017431945.1_ASM1743194v1                          | annotated species | cluster475 | cluster475 | Patescibacteria | Saccharimonadia | Saccharimonadales | Nanosyncoccaceae | Nanosyncoccus | Nanosyncoccus sp017431945 |
| GCA_017514665.1_ASM1751466v1                          | annotated species | cluster476 | cluster476 | Patescibacteria | Saccharimonadia | Saccharimonadales | Nanosyncoccaceae | Nanosyncoccus | Nanosyncoccus sp017514665 |
| GCA_017404795.1_ASM1740479v1                          | annotated species | cluster477 | cluster477 | Patescibacteria | Saccharimonadia | Saccharimonadales | Nanosyncoccaceae | Nanosyncoccus | Nanosyncoccus sp017404795 |
| GCA_017514025.1_ASM1751402v1                          | annotated species | cluster478 | cluster478 | Patescibacteria | Saccharimonadia | Saccharimonadales | Nanosyncoccaceae | Nanosyncoccus | Nanosyncoccus sp017514025 |
| GCA_013316435.1_ASM1331643v1                          | annotated species | cluster479 | cluster479 | Patescibacteria | Saccharimonadia | Saccharimonadales | Nanosyncoccaceae | Nanosyncoccus | Nanosyncoccus sp013316435 |
| GCA_946561855.1_SRR19792994_bin.70_metawrap_v1.3_MAG  | annotated species | cluster479 |            | Patescibacteria | Saccharimonadia | Saccharimonadales | Nanosyncoccaceae | Nanosyncoccus | Nanosyncoccus sp013316435 |
| GCA_947057165.1_ERR9465706_bin.42_metawrap_v1.3_MAG   | annotated species | cluster479 | cluster479 | Patescibacteria | Saccharimonadia | Saccharimonadales | Nanosyncoccaceae | Nanosyncoccus | Nanosyncoccus sp013316435 |
| GCA_947171955.1_SRR14862904_bin.27_metawrap_v1.3_MAG  | annotated species | cluster479 |            | Patescibacteria | Saccharimonadia | Saccharimonadales | Nanosyncoccaceae | Nanosyncoccus | Nanosyncoccus sp013316435 |
| GCA_947384105.1_ERR6760075_bin.53_metawrap_v1.3_MAG   | annotated species | cluster479 |            | Patescibacteria | Saccharimonadia | Saccharimonadales | Nanosyncoccaceae | Nanosyncoccus | Nanosyncoccus sp013316435 |
| GCA_947429035.1_SRR19981115_bin.12_metawrap_v1.3_MAG  | novel species     | cluster480 | cluster480 | Patescibacteria | Saccharimonadia | Saccharimonadales | Nanosyncoccaceae | Nanosyncoccus | Nanosyncoccus sp013316435 |
| GCA_947364605.1_SRR16350204_bin.1_metawrap_v1.3_MAG   | novel species     | cluster480 |            | Patescibacteria | Saccharimonadia | Saccharimonadales | Nanosyncoccaceae | Nanosyncoccus |                           |
| GCA_947367495.1_SRR15429271_bin.12_metawrap_v1.3_MAG  | novel species     | cluster480 | cluster480 | Patescibacteria | Saccharimonadia | Saccharimonadales | Nanosyncoccaceae | Nanosyncoccus |                           |
| GCA_947425995.1_SRR19981123_bin.1_metawrap_v1.3_MAG   | novel species     | cluster480 | cluster480 | Patescibacteria | Saccharimonadia | Saccharimonadales | Nanosyncoccaceae | Nanosyncoccus |                           |
| GCA_009777315.1_ASM977731v1                           | annotated species | cluster481 | cluster481 | Patescibacteria | Saccharimonadia | Saccharimonadales | Nanosyncoccaceae | WRMD01        | WRMD01 sp009777315        |
| RDPYD18300015_A_saliva.metaspades.bin.29              | novel species     | cluster482 | cluster482 | Patescibacteria | saccharimonadia | Saccharimonadales | Nanosyncoccaceae | Nanosyncoccus |                           |
| RSZYD18078181_A_saliva.metaspades.bin.24              | novel species     | cluster483 | cluster483 | Patescibacteria | saccharimonadia | Saccharimonadales | Nanosyncoccaceae | Nanosyncoccus |                           |
| GCA_013332955.2_ASM1333295v2                          | annotated species | cluster484 | cluster484 | Patescibacteria | Saccharimonadia | Saccharimonadales | Nanosyncoccaceae | Nanosyncoccus | Nanosyncoccus sp013332955 |
| GCA_013333135.2_ASM1333313v2                          | annotated species | cluster485 | cluster485 | Patescibacteria | Saccharimonadia | Saccharimonadales | Nanosyncoccaceae | Nanosyncoccus | Nanosyncoccus sp013333135 |
| GCA_013333375.2_ASM1333337v2                          | annotated species | cluster486 | cluster486 | Patescibacteria | Saccharimonadia | Saccharimonadales | Nanosyncoccaceae | Nanosyncoccus | Nanosyncoccus sp013333375 |
| RDPYD18088979_A_saliva.metaspades.bin.8               | novel species     | cluster487 | cluster487 | Patescibacteria | saccharimonadia | Saccharimonadales | Nanosyncoccaceae | Nanosyncoccus |                           |
| RSZYD18187327_A_saliva.metaspades.bin.15              | novel species     | cluster488 | cluster488 | Patescibacteria | saccharimonadia | Saccharimonadales | Nanosyncoccaceae | Nanosyncoccus |                           |
| RDPYD18098585_A_saliva.metaspades.bin.25              | novel species     | cluster489 | cluster489 | Patescibacteria | Saccharimonadia | Saccharimonadales | Nanosyncoccaceae | Nanosyncoccus |                           |
| RSZYD18078542_A_saliva.metaspades.bin.52              | novel species     | cluster490 | cluster490 | Patescibacteria | saccharimonadia | Saccharimonadales | Nanosyncoccaceae | Nanosyncoccus |                           |
| R0170300146_tooth_RA.megahit.bin.30                   | novel species     | cluster526 | cluster526 | Patescibacteria | saccharimonadia | Saccharimonadales | Nanosyncoccaceae | Nanosyncoccus |                           |
| R0170300271_tooth_RAH.megahit.bin.16                  | novel species     | cluster526 |            | Patescibacteria | saccharimonadia | Saccharimonadales | Nanosyncoccaceae | Nanosyncoccus |                           |
| R0170300294_tooth_RAH.megahit.bin.12                  | novel species     | cluster526 |            | Patescibacteria | saccharimonadia | Saccharimonadales | Nanosyncoccaceae | Nanosyncoccus |                           |
| RSZAXPI002619-34_RA_dental.metaspades.bin.5           | novel species     | cluster527 | cluster527 | Patescibacteria | saccharimonadia | Saccharimonadales | Nanosyncoccaceae | Nanosyncoccus |                           |
| R0170300056_tooth_RA.megahit.bin.105                  | novel species     | cluster527 |            | Patescibacteria | saccharimonadia | Saccharimonadales | Nanosyncoccaceae | Nanosyncoccus |                           |
| R0170300136_tooth_RA.megahit.bin.73                   | novel species     | cluster527 |            | Patescibacteria | saccharimonadia | Saccharimonadales | Nanosyncoccaceae | Nanosyncoccus |                           |
| R0170300249_tooth_RAH.megahit.bin.103                 | novel species     | cluster527 |            | Patescibacteria | saccharimonadia | Saccharimonadales | Nanosyncoccaceae | Nanosyncoccus |                           |
| R0170300281_tooth_RAH.megahit.bin.27                  | novel species     | cluster527 |            | Patescibacteria | saccharimonadia | Saccharimonadales | Nanosyncoccaceae | Nanosyncoccus |                           |
| R0170300323_tooth_RAH.megahit.bin.22                  | novel species     | cluster527 |            | Patescibacteria | saccharimonadia | Saccharimonadales | Nanosyncoccaceae | Nanosyncoccus |                           |
| SZAXPI018286-123_RA_dental.metaspades.bin.94          | novel species     | cluster528 |            | Patescibacteria | saccharimonadia | Saccharimonadales | Nanosyncoccaceae | Nanosyncoccus |                           |
| R0170300211_tooth_RA.megahit.bin.13                   | novel species     | cluster528 |            | Patescibacteria | saccharimonadia | Saccharimonadales | Nanosyncoccaceae | Nanosyncoccus |                           |
| R0170300223_tooth_RA.megahit.bin.80                   | novel species     | cluster528 |            | Patescibacteria | saccharimonadia | Saccharimonadales | Nanosyncoccaceae | Nanosyncoccus |                           |
| R0170300233_tooth_RA.megahit.bin.80                   | novel species     | cluster528 | cluster528 | Patescibacteria | saccharimonadia | Saccharimonadales | Nanosyncoccaceae | Nanosyncoccus |                           |
| R0170300302_tooth_RAH.megahit.bin.114                 | novel species     | cluster528 |            | Patescibacteria | saccharimonadia | Saccharimonadales | Nanosyncoccaceae | Nanosyncoccus |                           |
| RSZAXPI002308-17_RAH_dental.metaspades.bin.14         | novel species     | cluster529 |            | Patescibacteria | saccharimonadia | Saccharimonadales | Nanosyncoccaceae | Nanosyncoccus |                           |





|                                                      |                   |            |            |                 |                 |                   |                    |               |                           |
|------------------------------------------------------|-------------------|------------|------------|-----------------|-----------------|-------------------|--------------------|---------------|---------------------------|
| RSZYD18078769_A_saliva.metaspades.bin.60             | novel species     | cluster531 | cluster531 | Patescibacteria | saccharimonadia | Saccharimonadales | Nanosyncoccaceae   | Nanosyncoccus |                           |
| RDPYD18101880_A_saliva.metaspades.bin.11             | novel species     | cluster531 |            | Patescibacteria | Saccharimonadia | Saccharimonadales | Nanosyncoccaceae   | Nanosyncoccus |                           |
| RSZYD18187739_A_saliva.metaspades.bin.22             | novel species     | cluster531 |            | Patescibacteria | Saccharimonadia | Saccharimonadales | Nanosyncoccaceae   | Nanosyncoccus |                           |
| SZAXPI018312-14_RA_dental.metaspades.bin.62          | novel species     | cluster532 | cluster532 | Patescibacteria | saccharimonadia | Saccharimonadales | Nanosyncoccaceae   | Nanosyncoccus |                           |
| R0170300120_tooth_RA.megahit.bin.80                  | novel species     | cluster532 |            | Patescibacteria | saccharimonadia | Saccharimonadales | Nanosyncoccaceae   | Nanosyncoccus |                           |
| R0170300136_tooth_RA.megahit.bin.71                  | novel species     | cluster532 |            | Patescibacteria | saccharimonadia | Saccharimonadales | Nanosyncoccaceae   | Nanosyncoccus |                           |
| R0170300204_tooth_RA.megahit.bin.78                  | novel species     | cluster532 |            | Patescibacteria | saccharimonadia | Saccharimonadales | Nanosyncoccaceae   | Nanosyncoccus |                           |
| SZAXPI018493-25_RA_saliva.metaspades.bin.44          | novel species     | cluster533 | cluster533 | Patescibacteria | saccharimonadia | Saccharimonadales | Nanosyncoccaceae   | Nanosyncoccus |                           |
| RSZYD18078011_A_saliva.metaspades.bin.17             | novel species     | cluster533 |            | Patescibacteria | saccharimonadia | Saccharimonadales | Nanosyncoccaceae   | Nanosyncoccus |                           |
| RDPYD18300101_A_saliva.metaspades.bin.91             | novel species     | cluster534 |            | Patescibacteria | saccharimonadia | Saccharimonadales | Nanosyncoccaceae   | Nanosyncoccus |                           |
| RSZYD18078756_A_saliva.metaspades.bin.24             | novel species     | cluster534 |            | Patescibacteria | saccharimonadia | Saccharimonadales | Nanosyncoccaceae   | Nanosyncoccus |                           |
| RSZYD18187002_A_saliva.metaspades.bin.29             | novel species     | cluster534 |            | Patescibacteria | saccharimonadia | Saccharimonadales | Nanosyncoccaceae   | Nanosyncoccus |                           |
| RDPYD18123870_A_saliva.metaspades.bin.24             | novel species     | cluster534 |            | Patescibacteria | Saccharimonadia | Saccharimonadales | Nanosyncoccaceae   | Nanosyncoccus |                           |
| RDPYD18123880_A_tongue.metaspades.bin.23             | novel species     | cluster534 | cluster534 | Patescibacteria | Saccharimonadia | Saccharimonadales | Nanosyncoccaceae   | Nanosyncoccus |                           |
| RSZYD18078582_A_saliva.metaspades.bin.58             | annotated species | cluster535 |            | Patescibacteria | saccharimonadia | Saccharimonadales | Nanosyncoccaceae   | Nanosyncoccus | Nanosyncoccus nanoralicus |
| RSZYD18187120_A_saliva.metaspades.bin.19             | annotated species | cluster535 |            | Patescibacteria | saccharimonadia | Saccharimonadales | Nanosyncoccaceae   | Nanosyncoccus | Nanosyncoccus nanoralicus |
| RSZYD18187273_A_saliva.metaspades.bin.99             | annotated species | cluster535 | cluster535 | Patescibacteria | saccharimonadia | Saccharimonadales | Nanosyncoccaceae   | Nanosyncoccus | Nanosyncoccus nanoralicus |
| RDPYD18097649_A_saliva.metaspades.bin.16             | annotated species | cluster535 |            | Patescibacteria | Saccharimonadia | Saccharimonadales | Nanosyncoccaceae   | Nanosyncoccus | Nanosyncoccus nanoralicus |
| RSZYD18187707_A_saliva.metaspades.bin.80             | novel species     | cluster535 |            | Patescibacteria | saccharimonadia | Saccharimonadales | Nanosyncoccaceae   | Nanosyncoccus |                           |
| SZAXPI018439-102_RA_saliva.metaspades.bin.34         | annotated species | cluster536 | cluster536 | Patescibacteria | saccharimonadia | Saccharimonadales | Nanosyncoccaceae   | Nanosyncoccus | Nanosyncoccus nanoralicus |
| RSZYD18078140_A_saliva.metaspades.bin.44             | novel species     | cluster536 |            | Patescibacteria | saccharimonadia | Saccharimonadales | Nanosyncoccaceae   | Nanosyncoccus |                           |
| RSZYD18187115_A_saliva.metaspades.bin.47             | novel species     | cluster536 |            | Patescibacteria | saccharimonadia | Saccharimonadales | Nanosyncoccaceae   | Nanosyncoccus |                           |
| RDPYD18189966_A_saliva.metaspades.bin.40             | novel species     | cluster537 | cluster537 | Patescibacteria | saccharimonadia | Saccharimonadales | Nanosyncoccaceae   | Nanosyncoccus |                           |
| RSZYD18187234_A_saliva.metaspades.bin.82             | novel species     | cluster538 | cluster538 | Patescibacteria | saccharimonadia | Saccharimonadales | Nanosyncoccaceae   | Nanosyncoccus |                           |
| RSZYD18078695_A_saliva.metaspades.bin.25             | novel species     | cluster539 | cluster539 | Patescibacteria | saccharimonadia | Saccharimonadales | Nanosyncoccaceae   | Nanosyncoccus |                           |
| SZAXPI018273-75_RA_dental.metaspades.bin.34          | novel species     | cluster545 |            | Patescibacteria | saccharimonadia | Saccharimonadales | Nanosyncoccaceae   | Nanosyncoccus |                           |
| R0170300161_tooth_RA.megahit.bin.150                 | novel species     | cluster545 | cluster545 | Patescibacteria | saccharimonadia | Saccharimonadales | Nanosyncoccaceae   | Nanosyncoccus |                           |
| R0170300313_tooth_RA.megahit.bin.7                   | novel species     | cluster545 |            | Patescibacteria | saccharimonadia | Saccharimonadales | Nanosyncoccaceae   | Nanosyncoccus |                           |
| RSZYD18187790_A_saliva.metaspades.bin.2              | annotated species | cluster546 |            | Patescibacteria | saccharimonadia | Saccharimonadales | Nanosyncoccaceae   | Nanosyncoccus | Nanosyncoccus sp013332965 |
| SZAXPI018391-27_RA_saliva.metaspades.bin.47          | novel species     | cluster546 |            | Patescibacteria | saccharimonadia | Saccharimonadales | Nanosyncoccaceae   | Nanosyncoccus |                           |
| RSZYD18078325_A_saliva.metaspades.bin.95             | novel species     | cluster546 | cluster546 | Patescibacteria | saccharimonadia | Saccharimonadales | Nanosyncoccaceae   | Nanosyncoccus |                           |
| RDPYD18098896_A_saliva.metaspades.bin.29             | annotated species | cluster547 | cluster547 | Patescibacteria | Saccharimonadia | Saccharimonadales | Nanosyncoccaceae   | Nanosyncoccus | Nanosyncoccus sp013332965 |
| RSZYD18187503_A_saliva.metaspades.bin.53             | novel species     | cluster547 |            | Patescibacteria | saccharimonadia | Saccharimonadales | Nanosyncoccaceae   | Nanosyncoccus |                           |
| RDPYD18300081_A_saliva.metaspades.bin.28             | novel species     | cluster548 | cluster548 | Patescibacteria | saccharimonadia | Saccharimonadales | Nanosyncoccaceae   | Nanosyncoccus |                           |
| GCA_013333155.2_ASM1333315v2                         | annotated species | cluster549 |            | Patescibacteria | Saccharimonadia | Saccharimonadales | Nanosyncoccaceae   | Nanosyncoccus | Nanosyncoccus sp013332965 |
| GCA_013333205.2_ASM1333320v2                         | annotated species | cluster549 |            | Patescibacteria | Saccharimonadia | Saccharimonadales | Nanosyncoccaceae   | Nanosyncoccus | Nanosyncoccus sp013332965 |
| GCA_013333415.2_ASM1333341v2                         | annotated species | cluster549 |            | Patescibacteria | Saccharimonadia | Saccharimonadales | Nanosyncoccaceae   | Nanosyncoccus | Nanosyncoccus sp013332965 |
| GCA_015257505.1_ASM1525750v1                         | annotated species | cluster549 |            | Patescibacteria | Saccharimonadia | Saccharimonadales | Nanosyncoccaceae   | Nanosyncoccus | Nanosyncoccus sp013332965 |
| GCA_016112465.1_ASM1611246v1                         | annotated species | cluster549 |            | Patescibacteria | Saccharimonadia | Saccharimonadales | Nanosyncoccaceae   | Nanosyncoccus | Nanosyncoccus sp013332965 |
| SRR8114056.metaspades.bin.5                          | annotated species | cluster549 |            | Patescibacteria | saccharimonadia | Saccharimonadales | Nanosyncoccaceae   | Nanosyncoccus | Nanosyncoccus sp013332965 |
| SZAXPI018278-93_RA_dental.metaspades.bin.39          | annotated species | cluster549 |            | Patescibacteria | saccharimonadia | Saccharimonadales | Nanosyncoccaceae   | Nanosyncoccus | Nanosyncoccus sp013332965 |
| RDPYD18189960_A_saliva.metaspades.bin.21             | annotated species | cluster549 |            | Patescibacteria | saccharimonadia | Saccharimonadales | Nanosyncoccaceae   | Nanosyncoccus | Nanosyncoccus sp013332965 |
| RSZYD18187537_A_saliva.metaspades.bin.50             | annotated species | cluster549 | cluster549 | Patescibacteria | saccharimonadia | Saccharimonadales | Nanosyncoccaceae   | Nanosyncoccus | Nanosyncoccus sp013332965 |
| SRR8114048.metaspades.bin.17                         | novel species     | cluster549 |            | Patescibacteria | saccharimonadia | Saccharimonadales | Nanosyncoccaceae   | Nanosyncoccus |                           |
| RDPYD18300175_A_saliva.metaspades.bin.54             | novel species     | cluster550 | cluster550 | Patescibacteria | saccharimonadia | Saccharimonadales | Nanosyncoccaceae   | Nanosyncoccus |                           |
| RSZYD18078322_A_saliva.metaspades.bin.73             | novel species     | cluster551 | cluster551 | Patescibacteria | saccharimonadia | Saccharimonadales | Nanosyncoccaceae   | Nanosyncoccus |                           |
| RSZYD18078115_A_saliva.metaspades.bin.40             | novel species     | cluster552 | cluster552 | Patescibacteria | saccharimonadia | Saccharimonadales | Nanosyncoccaceae   | Nanosyncoccus |                           |
| RDPYD18088951_A_saliva.metaspades.bin.87             | novel species     | cluster553 | cluster553 | Patescibacteria | saccharimonadia | Saccharimonadales | Nanosyncoccaceae   | Nanosyncoccus |                           |
| RSZYD18078100_A_saliva.metaspades.bin.89             | novel species     | cluster554 | cluster554 | Patescibacteria | saccharimonadia | Saccharimonadales | Nanosyncoccaceae   | Nanosyncoccus |                           |
| GCA_947364965.1_SRR16350202_bin.8_metawrap_v1.3_MAG  | novel species     | cluster556 | cluster556 | Patescibacteria | Saccharimonadia | Saccharimonadales | Nanosyncoccaceae   | Nanosyncoccus |                           |
| GCA_947425855.1_SRR19981115_bin.7_metawrap_v1.3_MAG  | novel species     | cluster557 | cluster557 | Patescibacteria | Saccharimonadia | Saccharimonadales | Nanosyncoccaceae   | Nanosyncoccus |                           |
| GCA_947367795.1_SRR15431173_bin.17_metawrap_v1.3_MAG | novel species     | cluster558 |            | Patescibacteria | Saccharimonadia | Saccharimonadales | Nanosyncoccaceae   | Nanosyncoccus |                           |
| GCA_947385605.1_ERR6760111_bin.57_metawrap_v1.3_MAG  | novel species     | cluster558 | cluster558 | Patescibacteria | Saccharimonadia | Saccharimonadales | Nanosyncoccaceae   | Nanosyncoccus |                           |
| GCA_947389435.1_SRR15214583_bin.47_metawrap_v1.3_MAG | novel species     | cluster558 |            | Patescibacteria | Saccharimonadia | Saccharimonadales | Nanosyncoccaceae   | Nanosyncoccus |                           |
| GCA_947388495.1_SRR15214593_bin.20_metawrap_v1.3_MAG | novel species     | cluster559 | cluster559 | Patescibacteria | Saccharimonadia | Saccharimonadales | Nanosyncoccaceae   | Nanosyncoccus |                           |
| GCA_947364625.1_SRR16350215_bin.9_metawrap_v1.3_MAG  | novel species     | cluster560 |            | Patescibacteria | Saccharimonadia | Saccharimonadales | Nanosyncoccaceae   | Nanosyncoccus |                           |
| GCA_947426085.1_SRR18439536_bin.4_metawrap_v1.3_MAG  | novel species     | cluster560 |            | Patescibacteria | Saccharimonadia | Saccharimonadales | Nanosyncoccaceae   | Nanosyncoccus |                           |
| GCA_947648615.1_SRR15633991_bin.36_metawrap_v1.3_MAG | novel species     | cluster560 | cluster560 | Patescibacteria | Saccharimonadia | Saccharimonadales | Nanosyncoccaceae   | Nanosyncoccus |                           |
| GCA_947368805.1_SRR15431190_bin.13_metawrap_v1.3_MAG | novel species     | cluster561 | cluster561 | Patescibacteria | Saccharimonadia | Saccharimonadales | Nanosyncoccaceae   | Nanosyncoccus |                           |
| SZAXPI018286-123_RA_dental.metaspades.bin.12         | novel species     | cluster562 |            | Patescibacteria | saccharimonadia | Saccharimonadales | Saccharimonadaceae | Saccharimonas |                           |
| R0170300057_tooth_RA.megahit.bin.6                   | novel species     | cluster562 | cluster562 | Patescibacteria | saccharimonadia | Saccharimonadales | Saccharimonadaceae | Saccharimonas |                           |
| R0170300110_tooth_RA.megahit.bin.38                  | novel species     | cluster562 |            | Patescibacteria | saccharimonadia | Saccharimonadales | Saccharimonadaceae | Saccharimonas |                           |
| SZAXPI018189-47_RA_dental.metaspades.bin.40          | novel species     | cluster563 | cluster563 | Patescibacteria | saccharimonadia | Saccharimonadales | Saccharimonadaceae | Saccharimonas |                           |
| SZAXPI018277-90_RA_dental.metaspades.bin.45          | novel species     | cluster563 |            | Patescibacteria | saccharimonadia | Saccharimonadales | Saccharimonadaceae | Saccharimonas |                           |
| GCA_905372095.1_SRR9217394_mag-bin.2                 | annotated species | cluster564 | cluster564 | Patescibacteria | Saccharimonadia | Saccharimonadales | Saccharimonadaceae | Saccharimonas | Saccharimonas sp905372095 |
| GCA_905372195.1_SRR9217401_mag-bin.1                 | annotated species | cluster564 |            | Patescibacteria | Saccharimonadia | Saccharimonadales | Saccharimonadaceae | Saccharimonas | Saccharimonas sp905372095 |
| GCA_004138385.1_ASM413838v1                          | annotated species | cluster565 |            | Patescibacteria | Saccharimonadia | Saccharimonadales | Saccharimonadaceae | Saccharimonas | Saccharimonas sp015257605 |
| SZAXPI018280-95_RA_dental.metaspades.bin.36          | novel species     | cluster565 | cluster565 | Patescibacteria | saccharimonadia | Saccharimonadales | Saccharimonadaceae | Saccharimonas |                           |
| GCA_943914775.1_Tcv98XDF6C_bin.50.MAG                | annotated species | cluster566 |            | Patescibacteria | Saccharimonadia | Saccharimonadales | Saccharimonadaceae | Saccharimonas | Saccharimonas sp015257605 |
| RSZAXPI002657-17_RA_dental.metaspades.bin.42         | annotated species | cluster566 | cluster566 | Patescibacteria | saccharimonadia | Saccharimonadales | Saccharimonadaceae | Saccharimonas | Saccharimonas sp015257605 |
| SZAXPI018101-22_RA_dental.metaspades.bin.26          | annotated species | cluster566 |            | Patescibacteria | saccharimonadia | Saccharimonadales | Saccharimonadaceae | Saccharimonas | Saccharimonas sp015257605 |
| R0170300219_tooth_RA.megahit.bin.79                  | annotated species | cluster566 |            | Patescibacteria | saccharimonadia | Saccharimonadales | Saccharimonadaceae | Saccharimonas | Saccharimonas sp015257605 |















|                                                          |                   |            |                 |                 |                   |                    |               |                           |
|----------------------------------------------------------|-------------------|------------|-----------------|-----------------|-------------------|--------------------|---------------|---------------------------|
| R0170300300_tooth_RAH.megahit.bin.146                    | annotated species | cluster707 | Patescibacteria | saccharimonadia | Saccharimonadales | UBA10027           | SDRW01        | SDRW01 sp007845485        |
| R0170300301_tooth_RAH.megahit.bin.77                     | annotated species | cluster707 | Patescibacteria | saccharimonadia | Saccharimonadales | UBA10027           | SDRW01        | SDRW01 sp007845485        |
| R0170300303_tooth_RAH.megahit.bin.144                    | annotated species | cluster707 | Patescibacteria | saccharimonadia | Saccharimonadales | UBA10027           | SDRW01        | SDRW01 sp007845485        |
| R0170300305_tooth_RAH.megahit.bin.21                     | annotated species | cluster707 | Patescibacteria | saccharimonadia | Saccharimonadales | UBA10027           | SDRW01        | SDRW01 sp007845485        |
| R0170300306_tooth_RAH.megahit.bin.130                    | annotated species | cluster707 | Patescibacteria | saccharimonadia | Saccharimonadales | UBA10027           | SDRW01        | SDRW01 sp007845485        |
| R0170300309_tooth_RAH.megahit.bin.66                     | annotated species | cluster707 | Patescibacteria | saccharimonadia | Saccharimonadales | UBA10027           | SDRW01        | SDRW01 sp007845485        |
| R0170300311_tooth_RAH.megahit.bin.87                     | annotated species | cluster707 | Patescibacteria | saccharimonadia | Saccharimonadales | UBA10027           | SDRW01        | SDRW01 sp007845485        |
| R0170300318_tooth_RAH.megahit.bin.131                    | annotated species | cluster707 | Patescibacteria | saccharimonadia | Saccharimonadales | UBA10027           | SDRW01        | SDRW01 sp007845485        |
| R0170300320_tooth_RAH.megahit.bin.4                      | annotated species | cluster707 | Patescibacteria | saccharimonadia | Saccharimonadales | UBA10027           | SDRW01        | SDRW01 sp007845485        |
| R0170300321_tooth_RAH.megahit.bin.21                     | annotated species | cluster707 | Patescibacteria | saccharimonadia | Saccharimonadales | UBA10027           | SDRW01        | SDRW01 sp007845485        |
| R0170300323_tooth_RAH.megahit.bin.84                     | annotated species | cluster707 | Patescibacteria | saccharimonadia | Saccharimonadales | UBA10027           | SDRW01        | SDRW01 sp007845485        |
| R0170300327_tooth_RA.megahit.bin.68                      | annotated species | cluster707 | Patescibacteria | saccharimonadia | Saccharimonadales | UBA10027           | SDRW01        | SDRW01 sp007845485        |
| R0170300338_saliva_RA.megahit.bin.56                     | annotated species | cluster707 | Patescibacteria | saccharimonadia | Saccharimonadales | UBA10027           | SDRW01        | SDRW01 sp007845485        |
| RDPYD18098889_A_saliva.metaspades.bin.45                 | annotated species | cluster707 | Patescibacteria | Saccharimonadia | Saccharimonadales | UBA10027           | SDRW01        | SDRW01 sp007845485        |
| GCA_013334475.1_ASM1333447v1                             | annotated species | cluster708 | Patescibacteria | Saccharimonadia | Saccharimonadales | UBA1547            | SDRW01        | UBA1547 sp013334475       |
| GCA_027492255.1_ASM2749225v1                             | novel genus       | cluster709 | Patescibacteria | Saccharimonadia | Saccharimonadales | UBA5946            |               |                           |
| GCA_027446965.1_ASM2744696v1                             | novel species     | cluster710 | Patescibacteria | Saccharimonadia | Saccharimonadales | UBA4665            | UBA5150       |                           |
| GCA_002421965.1_ASM242196v1                              | annotated species | cluster711 | Patescibacteria | Saccharimonadia | Saccharimonadales | Nanosynbacteraceae | Nanosynbacter | Nanosynbacter sp002421965 |
| GCA_027312225.1_ASM2731222v1                             | novel genus       | cluster712 | Patescibacteria | Saccharimonadia | Saccharimonadales | UBA2112            |               |                           |
| GCA_010014515.1_ASM1001451v1                             | novel species     | cluster713 | Patescibacteria | Saccharimonadia | Saccharimonadales | Nanosynbacteraceae | Nanosynbacter |                           |
| GCA_903877025.1_freshwater_MAG_---_AlinenLipids_bin-2261 | annotated species | cluster714 | Patescibacteria | Saccharimonadia | Saccharimonadales | UBA4665            | CAIYEO01      | CAIYEO01 sp903839515      |
| GCA_903883035.1_freshwater_MAG_---_Umea_bin-05361        | annotated species | cluster715 | Patescibacteria | Saccharimonadia | Saccharimonadales | UBA4665            | CAIYEO01      | CAIYEO01 sp903900685      |
| GCA_903925195.1_freshwater_MAG_---_YR_bin-4708           | annotated species | cluster716 | Patescibacteria | Saccharimonadia | Saccharimonadales | UBA4665            | CAIYEO01      | CAIYEO01 sp903925195      |
| GCA_018001155.1_ASM1800115v1                             | novel species     | cluster717 | Patescibacteria | Saccharimonadia | Saccharimonadales | CAIOMD01           | JAGORN01      |                           |
| GCA_020428475.1_ASM2042847v1                             | novel genus       | cluster718 | Patescibacteria | Saccharimonadia | Saccharimonadales | CAIOMD01           |               |                           |
| GCA_903828465.1_freshwater_MAG_---_Umea3_bin-2596        | annotated species | cluster719 | Patescibacteria | Saccharimonadia | Saccharimonadales | UBA4665_A          | CAILQE01      | CAILQE01 sp903836325      |
| GCA_903836325.1_freshwater_MAG_---_KR2_bin-0178          | annotated species | cluster719 | Patescibacteria | Saccharimonadia | Saccharimonadales | UBA4665_A          | CAILQE01      | CAILQE01 sp903836325      |
| GCA_903837875.1_freshwater_MAG_---_Umea_bin-00478        | annotated species | cluster719 | Patescibacteria | Saccharimonadia | Saccharimonadales | UBA4665_A          | CAILQE01      | CAILQE01 sp903836325      |
| GCA_903847695.1_freshwater_MAG_---_YR_bin-4361           | annotated species | cluster719 | Patescibacteria | Saccharimonadia | Saccharimonadales | UBA4665_A          | CAILQE01      | CAILQE01 sp903836325      |
| GCA_014191035.1_ASM1419103v1                             | annotated species | cluster720 | Patescibacteria | Saccharimonadia | CAILAD01          | BJGX01             | BJGX01        | BJGX01 sp014191035        |
| GCA_017991755.1_ASM1799175v1                             | novel genus       | cluster721 | Patescibacteria | Saccharimonadia | Saccharimonadales | JAGPDM01           |               |                           |
| GCA_020427985.1_ASM2042798v1                             | novel genus       | cluster722 | Patescibacteria | Saccharimonadia | Saccharimonadales | UBA4665            |               |                           |
| GCA_020428275.1_ASM2042827v1                             | novel species     | cluster723 | Patescibacteria | Saccharimonadia | Saccharimonadales | Saccharimonadaceae | Saccharimonas |                           |
| GCA_023259925.1_ASM2325992v1                             | novel species     | cluster724 | Patescibacteria | Saccharimonadia | Saccharimonadales | UBA1020            | UBA1020       |                           |
| GCA_002336935.1_ASM233693v1                              | annotated species | cluster725 | Patescibacteria | Saccharimonadia | Saccharimonadales | Saccharimonadaceae | Saccharimonas | Saccharimonas sp002336935 |
| GCA_017983575.1_ASM1798357v1                             | novel species     | cluster726 | Patescibacteria | Saccharimonadia | Saccharimonadales | Saccharimonadaceae | Saccharimonas |                           |
| GCA_020428315.1_ASM2042831v1                             | novel genus       | cluster727 | Patescibacteria | Saccharimonadia | Saccharimonadales | UBA1020            |               |                           |
| GCA_014377695.1_ASM1437769v1                             | annotated species | cluster728 | Patescibacteria | Saccharimonadia | Saccharimonadales | UBA4665            | JACMPA01      | JACMPA01 sp014377695      |
| GCA_020428425.1_ASM2042842v1                             | novel genus       | cluster729 | Patescibacteria | Saccharimonadia | Saccharimonadales | AWTP1-31           |               |                           |
| RSZAXPI002619-34_RA_dental.metaspades.bin.39             | novel species     | cluster730 | Patescibacteria | saccharimonadia | Saccharimonadales | Saccharimonadaceae | Saccharimonas |                           |
| SZAXPI018317-19_RA_dental.metaspades.bin.46              | novel species     | cluster730 | Patescibacteria | saccharimonadia | Saccharimonadales | Saccharimonadaceae | Saccharimonas |                           |
| SZAXPI018488-20_RA_saliva.metaspades.bin.49              | novel species     | cluster730 | Patescibacteria | saccharimonadia | Saccharimonadales | Saccharimonadaceae | Saccharimonas |                           |
| R0170300260_tooth_RAH.megahit.bin.16                     | novel species     | cluster730 | Patescibacteria | saccharimonadia | Saccharimonadales | Saccharimonadaceae | Saccharimonas |                           |
| R0170300274_tooth_RAH.megahit.bin.32                     | novel species     | cluster730 | Patescibacteria | saccharimonadia | Saccharimonadales | Saccharimonadaceae | Saccharimonas |                           |
| R0170300293_tooth_RAH.megahit.bin.36                     | novel species     | cluster730 | Patescibacteria | saccharimonadia | Saccharimonadales | Saccharimonadaceae | Saccharimonas |                           |
| R0170300298_tooth_RAH.megahit.bin.133                    | novel species     | cluster730 | Patescibacteria | saccharimonadia | Saccharimonadales | Saccharimonadaceae | Saccharimonas |                           |
| R0170300306_tooth_RAH.megahit.bin.30                     | novel species     | cluster730 | Patescibacteria | saccharimonadia | Saccharimonadales | Saccharimonadaceae | Saccharimonas |                           |
| R0170300213_tooth_RA.megahit.bin.30                      | novel species     | cluster731 | Patescibacteria | saccharimonadia | Saccharimonadales | Saccharimonadaceae | Saccharimonas |                           |
| GCA_018127705.1_ASM1812770v1                             | annotated species | cluster732 | Patescibacteria | Saccharimonadia | Saccharimonadales | Saccharimonadaceae | Saccharimonas | Saccharimonas sp018127705 |
| RSZAXPI002316-25_RA_dental.metaspades.bin.41             | annotated species | cluster732 | Patescibacteria | saccharimonadia | Saccharimonadales | Saccharimonadaceae | Saccharimonas | Saccharimonas sp018127705 |
| SZAXPI018190-56_RA_dental.metaspades.bin.44              | annotated species | cluster732 | Patescibacteria | saccharimonadia | Saccharimonadales | Saccharimonadaceae | Saccharimonas | Saccharimonas sp018127705 |
| R0170300053_tooth_RA.megahit.bin.84                      | annotated species | cluster732 | Patescibacteria | saccharimonadia | Saccharimonadales | Saccharimonadaceae | Saccharimonas | Saccharimonas sp018127705 |
| R0170300178_tooth_RA.megahit.bin.65                      | annotated species | cluster732 | Patescibacteria | saccharimonadia | Saccharimonadales | Saccharimonadaceae | Saccharimonas | Saccharimonas sp018127705 |
| R0170300200_tooth_RA.megahit.bin.64                      | annotated species | cluster732 | Patescibacteria | saccharimonadia | Saccharimonadales | Saccharimonadaceae | Saccharimonas | Saccharimonas sp018127705 |
| R0170300285_tooth_RAH.megahit.bin.44                     | annotated species | cluster732 | Patescibacteria | saccharimonadia | Saccharimonadales | Saccharimonadaceae | Saccharimonas | Saccharimonas sp018127705 |
| GCA_905373345.1_SRR9217464-mag-bin.7                     | annotated species | cluster733 | Patescibacteria | Saccharimonadia | Saccharimonadales | Saccharimonadaceae | Saccharimonas | Saccharimonas sp905373345 |
| R0170300320_tooth_RAH.megahit.bin.52                     | annotated species | cluster733 | Patescibacteria | saccharimonadia | Saccharimonadales | Saccharimonadaceae | Saccharimonas | Saccharimonas sp905373345 |
| GCA_013333675.2_ASM1333367v2                             | annotated species | cluster734 | Patescibacteria | Saccharimonadia | Saccharimonadales | Saccharimonadaceae | Saccharimonas | Saccharimonas sp013333675 |
| GCA_947098845.1_SRR8786267_bin.6_metaWRAP_v1.3_MAG       | annotated species | cluster734 | Patescibacteria | Saccharimonadia | Saccharimonadales | Saccharimonadaceae | Saccharimonas | Saccharimonas sp013333675 |
| R0170300284_tooth_RAH.megahit.bin.22                     | annotated species | cluster734 | Patescibacteria | saccharimonadia | Saccharimonadales | Saccharimonadaceae | Saccharimonas | Saccharimonas sp013333675 |
| R0170300307_tooth_RAH.megahit.bin.81                     | annotated species | cluster734 | Patescibacteria | saccharimonadia | Saccharimonadales | Saccharimonadaceae | Saccharimonas | Saccharimonas sp013333675 |
| R0170300060_tooth_RA.megahit.bin.77                      | annotated species | cluster735 | Patescibacteria | saccharimonadia | Saccharimonadales | Saccharimonadaceae | Saccharimonas | Saccharimonas sp905371715 |
| R0170300137_tooth_RA.megahit.bin.75                      | annotated species | cluster735 | Patescibacteria | saccharimonadia | Saccharimonadales | Saccharimonadaceae | Saccharimonas | Saccharimonas sp905371715 |
| R0170300157_tooth_RA.megahit.bin.74                      | annotated species | cluster735 | Patescibacteria | saccharimonadia | Saccharimonadales | Saccharimonadaceae | Saccharimonas | Saccharimonas sp905371715 |
| R0170300210_tooth_RA.megahit.bin.95                      | annotated species | cluster735 | Patescibacteria | saccharimonadia | Saccharimonadales | Saccharimonadaceae | Saccharimonas | Saccharimonas sp905371715 |
| R0170300265_tooth_RAH.megahit.bin.100                    | annotated species | cluster735 | Patescibacteria | saccharimonadia | Saccharimonadales | Saccharimonadaceae | Saccharimonas | Saccharimonas sp905371715 |
| GCA_905372385.1_SRR9217408-mag-bin.1                     | annotated species | cluster736 | Patescibacteria | Saccharimonadia | Saccharimonadales | Saccharimonadaceae | Saccharimonas | Saccharimonas sp905371715 |
| RSZAXPI002311-20_RA_dental.metaspades.bin.6              | novel species     | cluster736 | Patescibacteria | saccharimonadia | Saccharimonadales | Saccharimonadaceae | Saccharimonas |                           |
| RSZAXPI002315-24_RA_dental.metaspades.bin.39             | novel species     | cluster736 | Patescibacteria | saccharimonadia | Saccharimonadales | Saccharimonadaceae | Saccharimonas |                           |
| RSZAXPI002326-41_RA_dental.metaspades.bin.35             | novel species     | cluster736 | Patescibacteria | saccharimonadia | Saccharimonadales | Saccharimonadaceae | Saccharimonas |                           |
| RSZAXPI002332-57_RA_dental.metaspades.bin.16             | novel species     | cluster736 | Patescibacteria | saccharimonadia | Saccharimonadales | Saccharimonadaceae | Saccharimonas |                           |
| RSZAXPI002628-79_RA_dental.metaspades.bin.30             | novel species     | cluster736 | Patescibacteria | saccharimonadia | Saccharimonadales | Saccharimonadaceae | Saccharimonas |                           |





|                                                       |                   |            |            |                 |                 |                   |                    |                 |                               |
|-------------------------------------------------------|-------------------|------------|------------|-----------------|-----------------|-------------------|--------------------|-----------------|-------------------------------|
| GCA_002482925.1_ASM248292v1                           | annotated species | cluster744 | cluster744 | Patescibacteria | Saccharimonadia | Saccharimonadales | UBA7683            | UBA7683         | UBA7683 sp002482925           |
| GCA_027459325.1_ASM2745932v1                          | novel species     | cluster745 | cluster745 | Patescibacteria | Saccharimonadia | Saccharimonadales | UBA4665            | UBA5150         |                               |
| GCA_013694995.1_ASM1369499v1                          | annotated species | cluster746 | cluster746 | Patescibacteria | Saccharimonadia | Saccharimonadales | JACDBH01           | JACDBH01        | JACDBH01 sp013694995          |
| GCA_946479835.1_SRR15094062_bin.4_metawrap_v1.3.0_MAG | novel species     | cluster747 | cluster747 | Patescibacteria | Saccharimonadia | Saccharimonadales | JACDBH01           | JACDBH01        |                               |
| GCA_025934715.1_ASM2593471v1                          | novel species     | cluster748 | cluster748 | Patescibacteria | Saccharimonadia | Saccharimonadales | UBA10212           | JACDFN01        |                               |
| GCA_946478715.1_SRR10754055_bin.5_metawrap_v1.3.0_MAG | novel genus       | cluster749 | cluster749 | Patescibacteria | Saccharimonadia | Saccharimonadales | UBA10212           |                 |                               |
| GCA_002316545.1_ASM231654v1                           | annotated species | cluster750 | cluster750 | Patescibacteria | Saccharimonadia | Saccharimonadales | UBA1020            | UBA1020         | UBA1020 sp002316545           |
| GCA_002455275.1_ASM245527v1                           | annotated species | cluster751 | cluster751 | Patescibacteria | Saccharimonadia | Saccharimonadales | UBA1020            | UBA1020         | UBA1020 sp002455275           |
| GCA_023257815.1_ASM2325781v1                          | novel species     | cluster752 | cluster752 | Patescibacteria | Saccharimonadia | Saccharimonadales | UBA1020            | UBA1020         |                               |
| GCA_002304695.1_ASM230469v1                           | annotated species | cluster753 | cluster753 | Patescibacteria | Saccharimonadia | Saccharimonadales | UBA1020            | UBA1020         | UBA1020 sp002335175           |
| GCA_002335175.1_ASM233517v1                           | annotated species | cluster753 | cluster753 | Patescibacteria | Saccharimonadia | Saccharimonadales | UBA1020            | UBA1020         | UBA1020 sp002335175           |
| GCA_002344735.1_ASM234473v1                           | annotated species | cluster753 | cluster753 | Patescibacteria | Saccharimonadia | Saccharimonadales | UBA1020            | UBA1020         | UBA1020 sp002335175           |
| GCA_002425115.1_ASM242511v1                           | annotated species | cluster753 | cluster753 | Patescibacteria | Saccharimonadia | Saccharimonadales | UBA1020            | UBA1020         | UBA1020 sp002335175           |
| GCA_002433925.1_ASM243392v1                           | annotated species | cluster753 | cluster753 | Patescibacteria | Saccharimonadia | Saccharimonadales | UBA1020            | UBA1020         | UBA1020 sp002335175           |
| GCA_002344715.1_ASM234471v1                           | annotated species | cluster754 | cluster754 | Patescibacteria | Saccharimonadia | Saccharimonadales | UBA5946            | UBA5946         | UBA5946 sp002434045           |
| GCA_002425145.1_ASM242514v1                           | annotated species | cluster754 | cluster754 | Patescibacteria | Saccharimonadia | Saccharimonadales | UBA5946            | UBA5946         | UBA5946 sp002434045           |
| GCA_002434045.1_ASM243404v1                           | annotated species | cluster754 | cluster754 | Patescibacteria | Saccharimonadia | Saccharimonadales | UBA5946            | UBA5946         | UBA5946 sp002434045           |
| GCA_017992295.1_ASM1799229v1                          | annotated species | cluster755 | cluster755 | Patescibacteria | Saccharimonadia | Saccharimonadales | CAIOMD01           | JAGOOV01        | JAGOOV01 sp017992295          |
| GCA_017510205.1_ASM1751020v1                          | novel species     | cluster756 | cluster756 | Patescibacteria | Saccharimonadia | Saccharimonadales | Nanosyncoccaceae   | Nanosyncoccus   |                               |
| GCA_017983775.1_ASM1798377v1                          | annotated species | cluster757 | cluster757 | Patescibacteria | Saccharimonadia | JAGOAT01          | JAGOAT01           | JAGOAT01        | JAGOAT01 sp017983775          |
| GCA_003022365.1_ASM302236v1                           | annotated species | cluster758 | cluster758 | Patescibacteria | Saccharimonadia | QS-5-54-17        | QS-5-54-17         | QS-5-54-17      | QS-5-54-17 sp003022365        |
| GCA_019352195.1_ASM1935219v1                          | novel genus       | cluster759 | cluster759 | Patescibacteria | Saccharimonadia | UBA4664           | UBA4664            |                 |                               |
| GCA_004138445.1_ASM413844v1                           | novel species     | cluster146 | cluster146 | Patescibacteria | Saccharimonadia | Saccharimonadales | Nanoperiomorbaceae | Nanoperiomorbus |                               |
| GCA_004138455.1_ASM413845v1                           | annotated species | cluster147 | cluster147 | Patescibacteria | Saccharimonadia | Saccharimonadales | Nanoperiomorbaceae | Nanoperiomorbus | Nanoperiomorbus periodonticus |
| GCA_905372225.1_SRR9217401-mag-bin.8                  | annotated species | cluster148 | cluster148 | Patescibacteria | Saccharimonadia | Saccharimonadales | Nanoperiomorbaceae | Nanoperiomorbus | Nanoperiomorbus sp905372225   |
| GCA_905373385.1_SRR9217464-mag-bin.2                  | annotated species | cluster149 | cluster149 | Patescibacteria | Saccharimonadia | Saccharimonadales | Nanoperiomorbaceae | Nanoperiomorbus | Nanoperiomorbus sp905373385   |
| GCA_905373275.1_SRR9217462-mag-bin.7                  | annotated species | cluster150 | cluster150 | Patescibacteria | Saccharimonadia | Saccharimonadales | Nanoperiomorbaceae | Nanoperiomorbus | Nanoperiomorbus sp905373275   |
| R0170300288_tooth_RAH.megahit.bin.40                  | novel species     | cluster151 | cluster151 | Patescibacteria | saccharimonadia | Saccharimonadales | Nanoperiomorbaceae | Nanoperiomorbus |                               |
| R0170300321_tooth_RAH.megahit.bin.95                  | novel species     | cluster151 | cluster151 | Patescibacteria | saccharimonadia | Saccharimonadales | Nanoperiomorbaceae | Nanoperiomorbus |                               |
| SZAXPI018396-36_RA_saliva.metaspades.bin.56           | novel species     | cluster152 | cluster152 | Patescibacteria | saccharimonadia | Saccharimonadales | Nanoperiomorbaceae | Nanoperiomorbus |                               |
| RSZAXPI002321-33_RAH_dental.metaspades.bin.29         | novel species     | cluster153 | cluster153 | Patescibacteria | saccharimonadia | Saccharimonadales | Nanoperiomorbaceae | Nanoperiomorbus |                               |
| RSZAXPI002331-56_RAH_dental.metaspades.bin.18         | novel species     | cluster153 | cluster153 | Patescibacteria | saccharimonadia | Saccharimonadales | Nanoperiomorbaceae | Nanoperiomorbus |                               |
| R0170300263_tooth_RAH.megahit.bin.26                  | novel species     | cluster154 | cluster154 | Patescibacteria | saccharimonadia | Saccharimonadales | Nanoperiomorbaceae | Nanoperiomorbus |                               |
| R0170300279_tooth_RAH.megahit.bin.30                  | novel species     | cluster155 | cluster155 | Patescibacteria | saccharimonadia | Saccharimonadales | Nanoperiomorbaceae | Nanoperiomorbus |                               |
| RSZAXPI002455-75_RAH_dental.metaspades.bin.27         | novel species     | cluster156 | cluster156 | Patescibacteria | saccharimonadia | Saccharimonadales | Nanoperiomorbaceae | Nanoperiomorbus |                               |
| R0170300214_tooth_RA.megahit.bin.92                   | novel species     | cluster157 | cluster157 | Patescibacteria | saccharimonadia | Saccharimonadales | Nanoperiomorbaceae | Nanoperiomorbus |                               |
| R0170300145_tooth_RA.megahit.bin.69                   | novel species     | cluster158 | cluster158 | Patescibacteria | saccharimonadia | Saccharimonadales | Nanoperiomorbaceae | Nanoperiomorbus |                               |
| RSZAXPI002312-21_RAH_dental.metaspades.bin.14         | novel species     | cluster159 | cluster159 | Patescibacteria | saccharimonadia | Saccharimonadales | Nanoperiomorbaceae | Nanoperiomorbus |                               |
| RSZAXPI002604-26_RAH_dental.metaspades.bin.6          | novel species     | cluster160 | cluster160 | Patescibacteria | saccharimonadia | Saccharimonadales | Nanoperiomorbaceae | Nanoperiomorbus |                               |
| R0170300115_tooth_RA.megahit.bin.91                   | novel species     | cluster160 | cluster160 | Patescibacteria | saccharimonadia | Saccharimonadales | Nanoperiomorbaceae | Nanoperiomorbus |                               |
| SZAXPI018284-111_RA_dental.metaspades.bin.3           | novel species     | cluster161 | cluster161 | Patescibacteria | saccharimonadia | Saccharimonadales | Nanoperiomorbaceae | Nanoperiomorbus |                               |
| R0170300228_tooth_RA.megahit.bin.36                   | novel species     | cluster162 | cluster162 | Patescibacteria | saccharimonadia | Saccharimonadales | Nanoperiomorbaceae | Nanoperiomorbus |                               |
| R0170300309_tooth_RAH.megahit.bin.15                  | novel species     | cluster163 | cluster163 | Patescibacteria | saccharimonadia | Saccharimonadales | Nanoperiomorbaceae | Nanoperiomorbus |                               |
| GCA_915070725.1_SRR1045092_bin.5_metaWRAP_v1.1_MAG    | novel species     | cluster164 | cluster164 | Patescibacteria | Saccharimonadia | Saccharimonadales | Nanoperiomorbaceae | Nanoperiomorbus |                               |
| RSZAXPI002619-34_RA_dental.metaspades.bin.45          | novel species     | cluster165 | cluster165 | Patescibacteria | saccharimonadia | Saccharimonadales | Nanoperiomorbaceae | Nanoperiomorbus |                               |
| R0170300136_tooth_RA.megahit.bin.26                   | novel species     | cluster165 | cluster165 | Patescibacteria | saccharimonadia | Saccharimonadales | Nanoperiomorbaceae | Nanoperiomorbus |                               |
| RSZYD18078570_A_saliva.metaspades.bin.17              | novel species     | cluster166 | cluster166 | Patescibacteria | saccharimonadia | Saccharimonadales | Nanoperiomorbaceae | Nanoperiomorbus |                               |
| SZAXPI018313-15_RA_dental.metaspades.bin.43           | novel species     | cluster167 | cluster167 | Patescibacteria | saccharimonadia | Saccharimonadales | Nanoperiomorbaceae | Nanoperiomorbus |                               |
| R0170300207_tooth_RA.megahit.bin.65                   | novel species     | cluster168 | cluster168 | Patescibacteria | saccharimonadia | Saccharimonadales | Nanoperiomorbaceae | Nanoperiomorbus |                               |
| R0170300272_tooth_RAH.megahit.bin.14                  | novel species     | cluster169 | cluster169 | Patescibacteria | saccharimonadia | Saccharimonadales | Nanoperiomorbaceae | Nanoperiomorbus |                               |
| RSZYD18187330_A_saliva.metaspades.bin.47              | novel species     | cluster170 | cluster170 | Patescibacteria | saccharimonadia | Saccharimonadales | Nanoperiomorbaceae | Nanoperiomorbus |                               |
| RSZAXPI002639-98_RA_dental.metaspades.bin.8           | novel species     | cluster171 | cluster171 | Patescibacteria | saccharimonadia | Saccharimonadales | Nanoperiomorbaceae | Nanoperiomorbus |                               |
| SZAXPI018357-22_RA_saliva.metaspades.bin.38           | novel species     | cluster171 | cluster171 | Patescibacteria | saccharimonadia | Saccharimonadales | Nanoperiomorbaceae | Nanoperiomorbus |                               |
| R0170300100_tooth_RA.megahit.bin.38                   | novel species     | cluster172 | cluster172 | Patescibacteria | saccharimonadia | Saccharimonadales | Nanoperiomorbaceae | Nanoperiomorbus |                               |
| R0170300252_tooth_RAH.megahit.bin.32                  | novel species     | cluster173 | cluster173 | Patescibacteria | saccharimonadia | Saccharimonadales | Nanoperiomorbaceae | Nanoperiomorbus |                               |
| R0170300219_tooth_RA.megahit.bin.90                   | novel species     | cluster174 | cluster174 | Patescibacteria | saccharimonadia | Saccharimonadales | Nanoperiomorbaceae | Nanoperiomorbus |                               |
| RSZYD18187275_A_saliva.metaspades.bin.59              | novel species     | cluster175 | cluster175 | Patescibacteria | saccharimonadia | Saccharimonadales | Nanoperiomorbaceae | Nanoperiomorbus |                               |
| SZAXPI018094-15_RA_dental.metaspades.bin.29           | novel species     | cluster176 | cluster176 | Patescibacteria | saccharimonadia | Saccharimonadales | Nanoperiomorbaceae | Nanoperiomorbus |                               |
| SZAXPI018354-19_RA_saliva.metaspades.bin.2            | novel species     | cluster177 | cluster177 | Patescibacteria | saccharimonadia | Saccharimonadales | Nanoperiomorbaceae | Nanoperiomorbus |                               |
| SZAXPI018355-20_RA_saliva.metaspades.bin.45           | novel species     | cluster177 | cluster177 | Patescibacteria | saccharimonadia | Saccharimonadales | Nanoperiomorbaceae | Nanoperiomorbus |                               |
| RSZAXPI002620-35_RA_dental.metaspades.bin.60          | novel species     | cluster177 | cluster177 | Patescibacteria | saccharimonadia | Saccharimonadales | Nanoperiomorbaceae | Nanoperiomorbus |                               |
| R0170300139_tooth_RAH.megahit.bin.95                  | novel species     | cluster178 | cluster178 | Patescibacteria | saccharimonadia | Saccharimonadales | Nanoperiomorbaceae | Nanoperiomorbus |                               |
| SZAXPI018171-25_1_RA_dental.metaspades.bin.83         | novel species     | cluster178 | cluster178 | Patescibacteria | saccharimonadia | Saccharimonadales | Nanoperiomorbaceae | Nanoperiomorbus |                               |
| SZAXPI018274-87_RA_dental.metaspades.bin.66           | novel species     | cluster179 | cluster179 | Patescibacteria | saccharimonadia | Saccharimonadales | Nanoperiomorbaceae | Nanoperiomorbus |                               |
| SZAXPI018320-22_RA_dental.metaspades.bin.9            | novel species     | cluster179 | cluster179 | Patescibacteria | saccharimonadia | Saccharimonadales | Nanoperiomorbaceae | Nanoperiomorbus |                               |
| R0170300282_tooth_RAH.megahit.bin.15                  | novel species     | cluster179 | cluster179 | Patescibacteria | saccharimonadia | Saccharimonadales | Nanoperiomorbaceae | Nanoperiomorbus |                               |
| R0170300183_tooth_RA.megahit.bin.33                   | novel species     | cluster180 | cluster180 | Patescibacteria | saccharimonadia | Saccharimonadales | Nanoperiomorbaceae | Nanoperiomorbus |                               |
| R0170300065_tooth_RA.megahit.bin.77                   | novel species     | cluster181 | cluster181 | Patescibacteria | saccharimonadia | Saccharimonadales | Nanoperiomorbaceae | Nanoperiomorbus |                               |
| R0170300155_tooth_RA.megahit.bin.58                   | novel species     | cluster182 | cluster182 | Patescibacteria | saccharimonadia | Saccharimonadales | Nanoperiomorbaceae | Nanoperiomorbus |                               |
| R0170300287_tooth_RAH.megahit.bin.151                 | novel species     | cluster183 | cluster183 | Patescibacteria | saccharimonadia | Saccharimonadales | Nanoperiomorbaceae | Nanoperiomorbus |                               |
| YS000254_saliva.spades.bin.23                         | novel species     | cluster184 | cluster184 | Patescibacteria | saccharimonadia | Saccharimonadales | Nanoperiomorbaceae | Nanoperiomorbus |                               |
| R0170300182_tooth_RA.megahit.bin.100                  | novel species     | cluster185 | cluster185 | Patescibacteria | saccharimonadia | Saccharimonadales | Nanoperiomorbaceae | Nanoperiomorbus |                               |

|                                                    |                   |            |            |                 |                 |                   |                    |                 |                            |
|----------------------------------------------------|-------------------|------------|------------|-----------------|-----------------|-------------------|--------------------|-----------------|----------------------------|
| R0170300083_tooth_RA.megahit.bin.110               | novel species     | cluster186 | cluster186 | Patescibacteria | saccharimonadia | Saccharimonadales | Nanoperiomorbaceae | Nanoperiomorbus |                            |
| R0170300149_tooth_RA.megahit.bin.28                | novel species     | cluster187 | cluster187 | Patescibacteria | saccharimonadia | Saccharimonadales | Nanoperiomorbaceae | Nanoperiomorbus |                            |
| R0170300267_tooth_RAH.megahit.bin.18               | novel species     | cluster188 | cluster188 | Patescibacteria | saccharimonadia | Saccharimonadales | Nanoperiomorbaceae | Nanoperiomorbus |                            |
| R0170300325_tooth_RA.megahit.bin.8                 | novel species     | cluster189 | cluster189 | Patescibacteria | saccharimonadia | Saccharimonadales | Nanoperiomorbaceae | Nanoperiomorbus |                            |
| RSZAXPI002456-79_RAH_dental.metaspades.bin.34      | novel species     | cluster190 | cluster190 | Patescibacteria | saccharimonadia | Saccharimonadales | Nanoperiomorbaceae | Nanoperiomorbus |                            |
| R0170300277_tooth_RAH.megahit.bin.80               | novel species     | cluster190 |            | Patescibacteria | saccharimonadia | Saccharimonadales | Nanoperiomorbaceae | Nanoperiomorbus |                            |
| R0170300251_tooth_RAH.megahit.bin.36               | novel species     | cluster191 | cluster191 | Patescibacteria | saccharimonadia | Saccharimonadales | Nanoperiomorbaceae | Nanoperiomorbus |                            |
| R0170300078_tooth_RA.megahit.bin.66                | novel species     | cluster192 | cluster192 | Patescibacteria | saccharimonadia | Saccharimonadales | Nanoperiomorbaceae | Nanoperiomorbus |                            |
| SZAXPI018435-88_RA_saliva.metaspades.bin.58        | novel species     | cluster193 | cluster193 | Patescibacteria | saccharimonadia | Saccharimonadales | Nanoperiomorbaceae | Nanoperiomorbus |                            |
| RSZAXPI002310-19_RAH_dental.metaspades.bin.24      | novel species     | cluster194 | cluster194 | Patescibacteria | saccharimonadia | Saccharimonadales | Nanoperiomorbaceae | Nanoperiomorbus |                            |
| RSZAXPI002629-81_RA_dental.metaspades.bin.82       | novel species     | cluster195 | cluster195 | Patescibacteria | saccharimonadia | Saccharimonadales | Nanoperiomorbaceae | Nanoperiomorbus |                            |
| R0170300170_tooth_RA.megahit.bin.136               | novel species     | cluster195 |            | Patescibacteria | saccharimonadia | Saccharimonadales | Nanoperiomorbaceae | Nanoperiomorbus |                            |
| R0170300200_tooth_RA.megahit.bin.29                | novel species     | cluster196 | cluster196 | Patescibacteria | saccharimonadia | Saccharimonadales | Nanoperiomorbaceae | Nanoperiomorbus |                            |
| R0170300092_tooth_RA.megahit.bin.31                | novel species     | cluster197 | cluster197 | Patescibacteria | saccharimonadia | Saccharimonadales | Nanoperiomorbaceae | Nanoperiomorbus |                            |
| SZAXPI018181-37_RA_dental.metaspades.bin.33        | novel species     | cluster198 | cluster198 | Patescibacteria | saccharimonadia | Saccharimonadales | Nanoperiomorbaceae | Nanoperiomorbus |                            |
| R0170300127_tooth_RA.megahit.bin.7                 | novel species     | cluster198 |            | Patescibacteria | saccharimonadia | Saccharimonadales | Nanoperiomorbaceae | Nanoperiomorbus |                            |
| R0170300185_tooth_RA.megahit.bin.44                | novel species     | cluster199 | cluster199 | Patescibacteria | saccharimonadia | Saccharimonadales | Nanoperiomorbaceae | Nanoperiomorbus |                            |
| RSZAXPI002656-16_RA_dental.metaspades.bin.48       | novel species     | cluster200 | cluster200 | Patescibacteria | saccharimonadia | Saccharimonadales | Nanoperiomorbaceae | Nanoperiomorbus |                            |
| R0170300172_tooth_RA.megahit.bin.52                | novel species     | cluster200 |            | Patescibacteria | saccharimonadia | Saccharimonadales | Nanoperiomorbaceae | Nanoperiomorbus |                            |
| R0170300176_tooth_RA.megahit.bin.83                | novel species     | cluster201 | cluster201 | Patescibacteria | saccharimonadia | Saccharimonadales | Nanoperiomorbaceae | Nanoperiomorbus |                            |
| R0170300276_tooth_RAH.megahit.bin.88               | novel species     | cluster202 | cluster202 | Patescibacteria | saccharimonadia | Saccharimonadales | Nanoperiomorbaceae | Nanoperiomorbus |                            |
| R0170300311_tooth_RAH.megahit.bin.92               | novel species     | cluster203 | cluster203 | Patescibacteria | saccharimonadia | Saccharimonadales | Nanoperiomorbaceae | Nanoperiomorbus |                            |
| RSZAXPI002305-14_RAH_dental.metaspades.bin.64      | novel species     | cluster204 | cluster204 | Patescibacteria | saccharimonadia | Saccharimonadales | Nanoperiomorbaceae | Nanoperiomorbus |                            |
| R0170300178_tooth_RA.megahit.bin.23                | novel species     | cluster205 | cluster205 | Patescibacteria | saccharimonadia | Saccharimonadales | Nanoperiomorbaceae | Nanoperiomorbus |                            |
| R0170300303_tooth_RAH.megahit.bin.143              | novel species     | cluster206 | cluster206 | Patescibacteria | saccharimonadia | Saccharimonadales | Nanoperiomorbaceae | Nanoperiomorbus |                            |
| R0170300310_tooth_RAH.megahit.bin.34               | novel species     | cluster207 | cluster207 | Patescibacteria | saccharimonadia | Saccharimonadales | Nanoperiomorbaceae | Nanoperiomorbus |                            |
| RSZYD18187666_A_saliva.metaspades.bin.39           | novel species     | cluster208 | cluster208 | Patescibacteria | saccharimonadia | Saccharimonadales | Nanoperiomorbaceae | Nanoperiomorbus |                            |
| R0170300222_tooth_RA.megahit.bin.89                | novel species     | cluster209 | cluster209 | Patescibacteria | saccharimonadia | Saccharimonadales | Nanoperiomorbaceae | Nanoperiomorbus |                            |
| R0170300290_tooth_RAH.megahit.bin.12               | novel species     | cluster210 | cluster210 | Patescibacteria | saccharimonadia | Saccharimonadales | Nanoperiomorbaceae | Nanoperiomorbus |                            |
| RSZAXPI002330-47_RAH_dental.metaspades.bin.70      | novel species     | cluster211 | cluster211 | Patescibacteria | saccharimonadia | Saccharimonadales | Nanoperiomorbaceae | Nanoperiomorbus |                            |
| R0170300270_tooth_RAH.megahit.bin.32               | novel species     | cluster212 | cluster212 | Patescibacteria | saccharimonadia | Saccharimonadales | Nanoperiomorbaceae | Nanoperiomorbus |                            |
| R0170300051_tooth_RA.megahit.bin.56                | novel species     | cluster213 | cluster213 | Patescibacteria | saccharimonadia | Saccharimonadales | Nanoperiomorbaceae | Nanoperiomorbus |                            |
| SZAXPI018178-34_RA_dental.metaspades.bin.52        | novel species     | cluster214 | cluster214 | Patescibacteria | saccharimonadia | Saccharimonadales | Nanoperiomorbaceae | Nanoperiomorbus |                            |
| R0170300232_tooth_RA.megahit.bin.10                | novel species     | cluster215 | cluster215 | Patescibacteria | saccharimonadia | Saccharimonadales | Nanoperiomorbaceae | Nanoperiomorbus |                            |
| R0170300106_tooth_RA.megahit.bin.39                | novel species     | cluster216 | cluster216 | Patescibacteria | saccharimonadia | Saccharimonadales | Nanoperiomorbaceae | Nanoperiomorbus |                            |
| RDPYD18189858_A_saliva.metaspades.bin.62           | novel species     | cluster217 | cluster217 | Patescibacteria | saccharimonadia | Saccharimonadales | Nanoperiomorbaceae | Nanoperiomorbus |                            |
| R0170300104_tooth_RA.megahit.bin.11                | novel species     | cluster240 |            | Patescibacteria | saccharimonadia | Saccharimonadales | Saccharimonadaceae | Saccharimonas   |                            |
| R0170300189_tooth_RA.megahit.bin.1                 | novel species     | cluster240 | cluster240 | Patescibacteria | saccharimonadia | Saccharimonadales | Saccharimonadaceae | Saccharimonas   |                            |
| GCA_013333645.2_ASM1333364v2                       | annotated species | cluster241 | cluster241 | Patescibacteria | saccharimonadia | Saccharimonadales | Saccharimonadaceae | Saccharimonas   | Saccharimonas sp013333645  |
| SZAXPI018281-102_RA_dental.metaspades.bin.20       | novel species     | cluster242 | cluster242 | Patescibacteria | saccharimonadia | Saccharimonadales | Saccharimonadaceae | Saccharimonas   |                            |
| GCA_927910745.1_ERR3827327_bin.3_metaWRAP_v1.1_MAG | novel species     | cluster243 | cluster243 | Patescibacteria | saccharimonadia | Saccharimonadales | Saccharimonadaceae | Saccharimonas   |                            |
| SZAXPI018316-18_RA_dental.metaspades.bin.5         | novel species     | cluster244 | cluster244 | Patescibacteria | saccharimonadia | Saccharimonadales | Saccharimonadaceae | Saccharimonas   |                            |
| R0170300199_tooth_RA.megahit.bin.62                | novel species     | cluster244 |            | Patescibacteria | saccharimonadia | Saccharimonadales | Saccharimonadaceae | Saccharimonas   |                            |
| R0170300051_tooth_RA.megahit.bin.53                | novel species     | cluster245 | cluster245 | Patescibacteria | saccharimonadia | Saccharimonadales | Saccharimonadaceae | Saccharimonas   |                            |
| SZAXPI018172-26_RA_dental.metaspades.bin.32        | novel species     | cluster246 |            | Patescibacteria | saccharimonadia | Saccharimonadales | Saccharimonadaceae | Saccharimonas   |                            |
| R0170300062_tooth_RA.megahit.bin.61                | novel species     | cluster246 | cluster246 | Patescibacteria | saccharimonadia | Saccharimonadales | Saccharimonadaceae | Saccharimonas   |                            |
| R0170300254_tooth_RAH.megahit.bin.128              | novel species     | cluster246 |            | Patescibacteria | saccharimonadia | Saccharimonadales | Saccharimonadaceae | Saccharimonas   |                            |
| RSZAXPI002629-81_RA_dental.metaspades.bin.76       | novel species     | cluster247 |            | Patescibacteria | saccharimonadia | Saccharimonadales | Saccharimonadaceae | Saccharimonas   |                            |
| R0170300170_tooth_RA.megahit.bin.155               | novel species     | cluster247 | cluster247 | Patescibacteria | saccharimonadia | Saccharimonadales | Saccharimonadaceae | Saccharimonas   |                            |
| R0170300055_tooth_RA.megahit.bin.5                 | novel species     | cluster248 |            | Patescibacteria | saccharimonadia | Saccharimonadales | Saccharimonadaceae | Saccharimonas   |                            |
| R0170300124_tooth_RA.megahit.bin.51                | novel species     | cluster248 | cluster248 | Patescibacteria | saccharimonadia | Saccharimonadales | Saccharimonadaceae | Saccharimonas   |                            |
| R0170300120_tooth_RA.megahit.bin.28                | novel species     | cluster249 | cluster249 | Patescibacteria | saccharimonadia | Saccharimonadales | Saccharimonadaceae | Saccharimonas   |                            |
| R0170300222_tooth_RA.megahit.bin.94                | novel species     | cluster250 | cluster250 | Patescibacteria | saccharimonadia | Saccharimonadales | Saccharimonadaceae | Saccharimonas   |                            |
| SZAXPI018096-17_RA_dental.metaspades.bin.23        | novel species     | cluster251 | cluster251 | Patescibacteria | saccharimonadia | Saccharimonadales | Saccharimonadaceae | Saccharimonas   |                            |
| RSZAXPI002323-35_RAH_dental.metaspades.bin.28      | novel species     | cluster252 | cluster252 | Patescibacteria | saccharimonadia | Saccharimonadales | Saccharimonadaceae | Saccharimonas   |                            |
| R0170300149_tooth_RA.megahit.bin.32                | novel species     | cluster252 |            | Patescibacteria | saccharimonadia | Saccharimonadales | Saccharimonadaceae | Saccharimonas   |                            |
| SZAXPI018291-142_RA_dental.metaspades.bin.37       | novel species     | cluster253 |            | Patescibacteria | saccharimonadia | Saccharimonadales | Saccharimonadaceae | Saccharimonas   |                            |
| R0170300196_tooth_RA.megahit.bin.11                | novel species     | cluster253 |            | Patescibacteria | saccharimonadia | Saccharimonadales | Saccharimonadaceae | Saccharimonas   |                            |
| R0170300282_tooth_RAH.megahit.bin.3                | novel species     | cluster253 | cluster253 | Patescibacteria | saccharimonadia | Saccharimonadales | Saccharimonadaceae | Saccharimonas   |                            |
| R0170300325_tooth_RA.megahit.bin.68                | novel species     | cluster253 |            | Patescibacteria | saccharimonadia | Saccharimonadales | Saccharimonadaceae | Saccharimonas   |                            |
| SZAXPI018287-129_RA_dental.metaspades.bin.24       | novel species     | cluster254 |            | Patescibacteria | saccharimonadia | Saccharimonadales | Saccharimonadaceae | Saccharimonas   |                            |
| SZAXPI018288-133_RA_dental.metaspades.bin.4        | novel species     | cluster254 | cluster254 | Patescibacteria | saccharimonadia | Saccharimonadales | Saccharimonadaceae | Saccharimonas   |                            |
| GCA_905373835.1_SRR9217492-mag-bin.7               | annotated species | cluster255 | cluster255 | Patescibacteria | saccharimonadia | Saccharimonadales | Saccharimonadaceae | Saccharimonas   | Saccharimonas sp905373835  |
| SZAXPI018184-41_RA_dental.metaspades.bin.37        | novel species     | cluster256 | cluster256 | Patescibacteria | saccharimonadia | Saccharimonadales | Saccharimonadaceae | Saccharimonas   |                            |
| RSZAXPI002675-22_RA_dental.metaspades.bin.61       | novel species     | cluster257 | cluster257 | Patescibacteria | saccharimonadia | Saccharimonadales | Saccharimonadaceae | Saccharimonas   |                            |
| R0170300179_tooth_RA.megahit.bin.15                | novel species     | cluster258 | cluster258 | Patescibacteria | saccharimonadia | Saccharimonadales | Saccharimonadaceae | Saccharimonas   |                            |
| RSZAXPI002650-142_RA_saliva.metaspades.bin.28      | novel species     | cluster259 | cluster259 | Patescibacteria | saccharimonadia | Saccharimonadales | Saccharimonadaceae | Saccharimonas   |                            |
| GCA_946222005.1_ZZEVbxAAOO_bin.25.MAG              | novel species     | cluster260 | cluster260 | Patescibacteria | saccharimonadia | Saccharimonadales | Saccharimonadaceae | Saccharimonas   |                            |
| R0170300061_tooth_RA.megahit.bin.12                | novel species     | cluster261 | cluster261 | Patescibacteria | saccharimonadia | Saccharimonadales | Saccharimonadaceae | Saccharimonas   |                            |
| RDPYD18300059_A_saliva.metaspades.bin.13           | novel species     | cluster262 | cluster262 | Patescibacteria | saccharimonadia | Saccharimonadales | Saccharimonadaceae | Saccharimonas   |                            |
| R0170300203_tooth_RA.megahit.bin.94                | novel species     | cluster263 | cluster263 | Patescibacteria | saccharimonadia | Saccharimonadales | Saccharimonadaceae | Saccharimonas   |                            |
| RSZAXPI002460-93_2_RAH_saliva.metaspades.bin.39    | annotated species | cluster295 | cluster263 | Patescibacteria | saccharimonadia | Saccharimonadales | Nanogingivalaceae  | Nanogingivalis  | Nanogingivalis sp900555945 |























|                                              |                   |            |            |                 |                 |                   |                    |               |                           |
|----------------------------------------------|-------------------|------------|------------|-----------------|-----------------|-------------------|--------------------|---------------|---------------------------|
| YS000207_saliva.spades.bin.17                | novel species     | cluster681 |            | Patescibacteria | saccharimonadia | Saccharimonadales | Nanosynbacteraceae | Nanosynbacter |                           |
| YS000545_saliva.spades.bin.26                | novel species     | cluster681 | cluster681 | Patescibacteria | saccharimonadia | Saccharimonadales | Nanosynbacteraceae | Nanosynbacter |                           |
| YS001132_saliva.spades.bin.25                | novel species     | cluster682 | cluster682 | Patescibacteria | saccharimonadia | Saccharimonadales | Nanosynbacteraceae | Nanosynbacter |                           |
| SZAXPI018400-40_RA_saliva.metaspades.bin.35  | novel species     | cluster683 | cluster683 | Patescibacteria | saccharimonadia | Saccharimonadales | Nanosynbacteraceae | Nanosynbacter |                           |
| RDPYD18189925_A_saliva.metaspades.bin.14     | novel species     | cluster684 | cluster684 | Patescibacteria | saccharimonadia | Saccharimonadales | Nanosynbacteraceae | Nanosynbacter |                           |
| RSZYD18078161_A_saliva.metaspades.bin.1      | novel species     | cluster685 | cluster685 | Patescibacteria | saccharimonadia | Saccharimonadales | Nanosynbacteraceae | Nanosynbacter |                           |
| RDPYD18088984_A_saliva.metaspades.bin.13     | novel species     | cluster686 | cluster686 | Patescibacteria | saccharimonadia | Saccharimonadales | Nanosynbacteraceae | Nanosynbacter |                           |
| SRR8114041.metaspades.bin.6                  | novel species     | cluster687 | cluster687 | Patescibacteria | saccharimonadia | Saccharimonadales | Nanosynbacteraceae | Nanosynbacter |                           |
| GCA_024330325.1_ASM2433032v1                 | novel species     | cluster688 |            | Patescibacteria | Saccharimonadia | Saccharimonadales | Nanosynbacteraceae | Nanosynbacter |                           |
| RSZAXPI002682-32_RA_saliva.metaspades.bin.12 | novel species     | cluster688 | cluster688 | Patescibacteria | saccharimonadia | Saccharimonadales | Nanosynbacteraceae | Nanosynbacter |                           |
| RSZYD18078438_A_saliva.metaspades.bin.6      | novel species     | cluster689 |            | Patescibacteria | saccharimonadia | Saccharimonadales | Nanosynbacteraceae | Nanosynbacter |                           |
| RSZYD18187015_A_saliva.metaspades.bin.20     | novel species     | cluster689 |            | Patescibacteria | saccharimonadia | Saccharimonadales | Nanosynbacteraceae | Nanosynbacter |                           |
| RSZYD18187656_A_saliva.metaspades.bin.41     | novel species     | cluster689 | cluster689 | Patescibacteria | saccharimonadia | Saccharimonadales | Nanosynbacteraceae | Nanosynbacter |                           |
| RDPYD18099019_A_saliva.metaspades.bin.28     | novel species     | cluster690 | cluster690 | Patescibacteria | Saccharimonadia | Saccharimonadales | Nanosynbacteraceae | Nanosynbacter |                           |
| YS000063_saliva.spades.bin.11                | novel species     | cluster690 |            | Patescibacteria | saccharimonadia | Saccharimonadales | Nanosynbacteraceae | Nanosynbacter |                           |
| RSZAXPI002653-13_RA_saliva.metaspades.bin.70 | novel species     | cluster691 | cluster691 | Patescibacteria | saccharimonadia | Saccharimonadales | Nanosynbacteraceae | Nanosynbacter |                           |
| RSZYD18187244_A_saliva.metaspades.bin.38     | novel species     | cluster692 |            | Patescibacteria | saccharimonadia | Saccharimonadales | Nanosynbacteraceae | Nanosynbacter |                           |
| RSZYD18187899_A_saliva.metaspades.bin.64     | novel species     | cluster692 |            | Patescibacteria | saccharimonadia | Saccharimonadales | Nanosynbacteraceae | Nanosynbacter |                           |
| YS000282_saliva.spades.bin.24                | novel species     | cluster692 | cluster692 | Patescibacteria | saccharimonadia | Saccharimonadales | Nanosynbacteraceae | Nanosynbacter |                           |
| GCA_900555265.1_UMGS1805                     | annotated species | cluster693 | cluster693 | Patescibacteria | Saccharimonadia | Saccharimonadales | Nanosynbacteraceae | Nanosynbacter | Nanosynbacter sp900555265 |
| SRR8114063.metaspades.bin.48                 | annotated species | cluster693 |            | Patescibacteria | saccharimonadia | Saccharimonadales | Nanosynbacteraceae | Nanosynbacter | Nanosynbacter sp900555265 |
| RSZYD18187466_A_saliva.metaspades.bin.39     | novel species     | cluster694 | cluster694 | Patescibacteria | saccharimonadia | Saccharimonadales | Nanosynbacteraceae | Nanosynbacter |                           |
| RSZYD18078153_A_saliva.metaspades.bin.25     | novel species     | cluster695 | cluster695 | Patescibacteria | saccharimonadia | Saccharimonadales | Nanosynbacteraceae | Nanosynbacter |                           |
| YS000581_saliva.spades.bin.8                 | novel species     | cluster695 |            | Patescibacteria | saccharimonadia | Saccharimonadales | Nanosynbacteraceae | Nanosynbacter |                           |
| YS000364_saliva.spades.bin.27                | novel species     | cluster696 | cluster696 | Patescibacteria | saccharimonadia | Saccharimonadales | Nanosynbacteraceae | Nanosynbacter |                           |
| RSZYD18078673_A_saliva.metaspades.bin.3      | novel species     | cluster697 | cluster697 | Patescibacteria | saccharimonadia | Saccharimonadales | Nanosynbacteraceae | Nanosynbacter |                           |
| RSZYD18078703_A_saliva.metaspades.bin.8      | novel species     | cluster697 |            | Patescibacteria | saccharimonadia | Saccharimonadales | Nanosynbacteraceae | Nanosynbacter |                           |
| RSZYD18187540_A_saliva.metaspades.bin.35     | novel species     | cluster698 | cluster698 | Patescibacteria | saccharimonadia | Saccharimonadales | Nanosynbacteraceae | Nanosynbacter |                           |
| YS000685_saliva.spades.bin.9                 | novel species     | cluster698 |            | Patescibacteria | saccharimonadia | Saccharimonadales | Nanosynbacteraceae | Nanosynbacter |                           |
| RSZYD18187542_A_saliva.metaspades.bin.26     | novel species     | cluster699 |            | Patescibacteria | saccharimonadia | Saccharimonadales | Nanosynbacteraceae | Nanosynbacter |                           |
| RSZYD18187676_A_saliva.metaspades.bin.32     | novel species     | cluster699 | cluster699 | Patescibacteria | saccharimonadia | Saccharimonadales | Nanosynbacteraceae | Nanosynbacter |                           |
| RDPYD18101881_A_saliva.metaspades.bin.12     | novel species     | cluster699 |            | Patescibacteria | Saccharimonadia | Saccharimonadales | Nanosynbacteraceae | Nanosynbacter |                           |
| YS000915_saliva.spades.bin.1                 | novel species     | cluster700 | cluster700 | Patescibacteria | saccharimonadia | Saccharimonadales | Nanosynbacteraceae | Nanosynbacter |                           |
| SRR8114009.metaspades.bin.3                  | novel species     | cluster701 | cluster701 | Patescibacteria | saccharimonadia | Saccharimonadales | Nanosynbacteraceae | Nanosynbacter |                           |
| RSZYD18078773_A_saliva.metaspades.bin.71     | novel species     | cluster702 | cluster702 | Patescibacteria | saccharimonadia | Saccharimonadales | Nanosynbacteraceae | Nanosynbacter |                           |
| RDPYD18201627_A_saliva.metaspades.bin.4      | novel species     | cluster703 | cluster703 | Patescibacteria | Saccharimonadia | Saccharimonadales | Nanosynbacteraceae | Nanosynbacter |                           |



**Supplementary Table 3a. Comparison of metabolic module completeness of cocultured Saccharibacteira-host bacteria pairs.**

| Organism         | Genome                       | Strain                 | M00002 | M00005 | M00011 | M00307 | M00001 | M00006 | M00015 | M00022 | M00018 | M00020 | M00432 | M00023 | M00049 | M00050 | M00051 | M00048 | M00120 | M00119 | M00149 | M00153 | M00157 | M00579 | M00144 | M00145 | M00082 | M00083 | M00086 |   |
|------------------|------------------------------|------------------------|--------|--------|--------|--------|--------|--------|--------|--------|--------|--------|--------|--------|--------|--------|--------|--------|--------|--------|--------|--------|--------|--------|--------|--------|--------|--------|--------|---|
| host bacteria    | GCA_000186685.1_ASM18668v1   | A. sp. HMT 178 F0338   | 1      | 1      | 1      | 1      | 1      | 1      | 1      | 1      | 1      | 1      | 1      | 1      | 1      | 1      | 1      | 1      | 1      | 1      | 1      | 1      | 1      | 1      | 1      | 1      | 1      | 1      | 1      |   |
| host bacteria    | GCA_000466305.1_ASM46630v1   | A. sp. HMT 877 F0543   | 1      | 1      | 1      | 1      | 1      | 1      | 1      | 1      | 1      | 1      | 1      | 0.5    | 1      | 1      | 1      | 1      | 1      | 1      | 1      | 1      | 1      | 1      | 1      | 1      | 1      | 1      | 1      | 1 |
| host bacteria    | GCA_001262055.1_ASM126205v1  | A. meyeri W712         | 1      | 1      | 1      | 1      | 1      | 1      | 1      | 1      | 1      | 1      | 0.5    | 0.5    | 1      | 1      | 0.5    | 0.5    | 1      | 1      | 1      | 1      | 1      | 1      | 1      | 1      | 1      | 1      | 1      | 1 |
| host bacteria    | GCA_005696695.1_ASM569669v1  | A. odontolyticus XH001 | 1      | 1      | 1      | 1      | 1      | 1      | 1      | 1      | 1      | 1      | 1      | 1      | 1      | 1      | 1      | 1      | 1      | 1      | 1      | 1      | 1      | 1      | 1      | 1      | 1      | 1      | 1      | 1 |
| host bacteria    | GCA_000282935.1_AspICM39v1.0 | A. sp. ICM39           | 1      | 1      | 1      | 1      | 1      | 1      | 1      | 1      | 1      | 1      | 1      | 1      | 1      | 1      | 1      | 1      | 1      | 1      | 1      | 1      | 1      | 1      | 1      | 1      | 1      | 1      | 1      | 1 |
| host bacteria    | GCA_000185285.1_ASM18528v1   | A. sp. HMT180 F0310    | 1      | 1      | 1      | 1      | 1      | 1      | 1      | 1      | 1      | 1      | 1      | 1      | 1      | 1      | 1      | 1      | 1      | 1      | 1      | 1      | 1      | 1      | 1      | 1      | 1      | 1      | 1      | 1 |
| host bacteria    | GCA_000163415.1_ASM16341v1   | A. odontolyticus F0309 | 1      | 1      | 1      | 1      | 1      | 1      | 1      | 1      | 1      | 1      | 1      | 1      | 1      | 1      | 1      | 1      | 1      | 1      | 1      | 1      | 1      | 1      | 1      | 1      | 1      | 1      | 1      | 1 |
| host bacteria    | GCA_000466265.1_ASM46626v1   | A. sp. HMT 172 F0311   | 1      | 1      | 1      | 1      | 1      | 1      | 1      | 1      | 1      | 1      | 1      | 1      | 1      | 1      | 1      | 1      | 1      | 1      | 1      | 1      | 1      | 1      | 1      | 1      | 1      | 1      | 1      | 1 |
| host bacteria    | GCA_000283035.1_AspICM58v1.0 | A. sp. ICM58           | 1      | 1      | 1      | 1      | 1      | 1      | 1      | 1      | 1      | 1      | 1      | 1      | 1      | 1      | 1      | 1      | 1      | 1      | 1      | 1      | 1      | 1      | 1      | 1      | 1      | 1      | 1      | 1 |
| Saccharibacteria | GCA_005697395.1_ASM569739v1  | TM7x                   | 1      | 0      | 0      | 0      | 0.5    | 0      | 0      | 0      | 0      | 0      | 0      | 0      | 0.5    | 0.5    | 0.5    | 0      | 0.5    | 0      | 0      | 0      | 0      | 0      | 0      | 0      | 0      | 0      | 0      | 0 |
| host bacteria    | GCA_005696555.1_ASM569655v1  | A. sp. HMT 171 F0337   | 1      | 1      | 1      | 1      | 1      | 1      | 1      | 1      | 1      | 1      | 1      | 1      | 1      | 1      | 1      | 1      | 1      | 1      | 1      | 1      | 1      | 1      | 1      | 1      | 1      | 1      | 1      | 1 |
| Saccharibacteria | GCA_005697565.1_ASM569756v1  | BB001                  | 1      | 0      | 0.5    | 1      | 0.5    | 0      | 0      | 0      | 0      | 0      | 0      | 0      | 0.5    | 0.5    | 0.5    | 0      | 0.5    | 0      | 0      | 0      | 0      | 1      | 0      | 0      | 0      | 0      | 0      | 0 |
| Saccharibacteria | GCA_005697055.1_ASM569705v1  | PM004                  | 1      | 0      | 0.5    | 1      | 0.5    | 0      | 0      | 0      | 0      | 0      | 0      | 0      | 0.5    | 0.5    | 0.5    | 0      | 0.5    | 0      | 0      | 0      | 0      | 1      | 0.5    | 0      | 0      | 0      | 0      | 0 |
| host bacteria    | GCA_002999235.1_ASM299923v1  | A. sp. HMT 897 F0700   | 1      | 1      | 1      | 1      | 1      | 1      | 1      | 1      | 1      | 1      | 1      | 1      | 1      | 1      | 1      | 1      | 1      | 1      | 1      | 1      | 1      | 1      | 1      | 1      | 1      | 1      | 1      | 1 |
| Saccharibacteria | GCA_018127705.1_ASM1812770v1 | PM007                  | 0.5    | 0      | 0.5    | 0      | 0.5    | 0      | 0      | 0      | 0      | 0      | 0      | 0      | 0.5    | 0.5    | 0.5    | 0      | 0.5    | 0      | 0      | 0      | 0      | 1      | 0      | 0      | 0      | 0      | 0      | 0 |
| host bacteria    | GCA_005696855.1_ASM569685v1  | P. propionicum F0700   | 1      | 1      | 1      | 1      | 1      | 1      | 1      | 1      | 1      | 1      | 1      | 1      | 1      | 1      | 1      | 1      | 1      | 1      | 1      | 1      | 1      | 1      | 1      | 1      | 1      | 1      | 1      | 1 |
| Saccharibacteria | GCA_005697215.1_ASM569721v1  | AC001                  | 1      | 0      | 0      | 0      | 0.5    | 0      | 0      | 0      | 0      | 0.5    | 0      | 0      | 0.5    | 0.5    | 0.5    | 0      | 0.5    | 0      | 0      | 0      | 1      | 0.5    | 0      | 0      | 0      | 0      | 0.5    | 0 |
| Saccharibacteria | GCA_013100845.1_ASM1310084v1 | AC002                  | 1      | 0      | 0      | 0      | 0.5    | 0      | 0      | 0      | 0      | 0      | 0      | 0      | 0.5    | 0.5    | 0.5    | 0      | 0.5    | 0      | 0      | 0      | 1      | 0.5    | 0      | 0      | 0      | 0      | 0      | 0 |
| Saccharibacteria | GCA_013099195.1_ASM1309919v1 | CM001                  | 1      | 0      | 0      | 0      | 0.5    | 0      | 0      | 0      | 0      | 0.5    | 0      | 0      | 0.5    | 0.5    | 0.5    | 0      | 0.5    | 0      | 0      | 0      | 1      | 0.5    | 0      | 0      | 0      | 0      | 0      | 0 |
| Saccharibacteria | GCA_013099015.1_ASM1309901v1 | CM002                  | 1      | 0      | 0      | 0      | 0.5    | 0      | 0      | 0      | 0      | 0      | 0      | 0      | 0.5    | 0.5    | 0.5    | 0      | 0.5    | 0      | 0      | 0      | 1      | 0.5    | 0      | 0      | 0      | 0      | 0      | 0 |
| Saccharibacteria | GCA_013098855.1_ASM1309885v1 | CM003                  | 1      | 0      | 0.5    | 1      | 0.5    | 0      | 0      | 0.5    | 0      | 0      | 0      | 0      | 0.5    | 0.5    | 0.5    | 0      | 0.5    | 0      | 0      | 0      | 1      | 0.5    | 0      | 0      | 0      | 0      | 0.5    | 0 |
| Saccharibacteria | GCA_013100825.1_ASM1310082v1 | CM006                  | 1      | 0      | 0      | 0      | 0.5    | 0      | 0      | 0      | 0      | 0.5    | 0      | 0      | 0.5    | 0.5    | 0.5    | 0      | 0.5    | 0      | 0      | 0      | 1      | 0.5    | 0      | 0      | 0      | 0      | 0      | 0 |
| Saccharibacteria | GCA_013098655.1_ASM1309865v1 | CM009                  | 1      | 0      | 0.5    | 1      | 0.5    | 0      | 0      | 0      | 0      | 0      | 0      | 0      | 0.5    | 0.5    | 0.5    | 0      | 0.5    | 0      | 0      | 0      | 1      | 0.5    | 0      | 0      | 0      | 0      | 0      | 0 |
| Saccharibacteria | GCA_013098515.1_ASM1309851v1 | CM010                  | 1      | 0      | 0      | 0      | 0.5    | 0      | 0      | 0      | 0      | 0      | 0      | 0      | 0.5    | 0.5    | 0.5    | 0      | 0.5    | 0      | 0      | 0      | 1      | 0.5    | 0      | 0      | 0      | 0      | 0      | 0 |
| Saccharibacteria | GCA_013100805.1_ASM1310080v1 | FS03P                  | 1      | 0      | 0      | 0      | 0.5    | 0      | 0      | 0      | 0      | 0      | 0      | 0      | 0.5    | 0.5    | 0.5    | 0      | 0.5    | 0      | 0      | 0      | 1      | 0.5    | 0      | 0      | 0      | 0.5    | 0      | 0 |
| Saccharibacteria | GCA_010202845.1_ASM1020284v1 | FS05P-B                | 1      | 0      | 0      | 0      | 0.5    | 0      | 0      | 0      | 0      | 0      | 0      | 0      | 0.5    | 0.5    | 0.5    | 0      | 0.5    | 0      | 0      | 0      | 1      | 0.5    | 0      | 0      | 0      | 0      | 0      | 0 |
| Saccharibacteria | GCA_010202645.1_ASM1020264v1 | FS07P                  | 1      | 0      | 0      | 0      | 0.5    | 0      | 0      | 0      | 0      | 0      | 0      | 0      | 0.5    | 0.5    | 0.5    | 0      | 0.5    | 0      | 0      | 0      | 1      | 0.5    | 0      | 0      | 0      | 0      | 0      | 0 |
| Saccharibacteria | GCA_010202465.1_ASM1020246v1 | FS13P                  | 1      | 0      | 0      | 0      | 0.5    | 0      | 0      | 0      | 0      | 0      | 0      | 0      | 0.5    | 0.5    | 0.5    | 0      | 0.5    | 0      | 0      | 0      | 1      | 0.5    | 0      | 0      | 0      | 0      | 0      | 0 |
| Saccharibacteria | GCA_010202265.1_ASM1020226v1 | FS14P                  | 1      | 0      | 0.5    | 1      | 0.5    | 0      | 0      | 0.5    | 0      | 0      | 0      | 0      | 0.5    | 0.5    | 0.5    | 0      | 0.5    | 0      | 0      | 0      | 1      | 0.5    | 0      | 0      | 0      | 0      | 0      | 0 |
| Saccharibacteria | GCA_010202115.1_ASM1020211v1 | FS15P                  | 1      | 0      | 0      | 0      | 0.5    | 0      | 0      | 0      | 0      | 0      | 0      | 0      | 0.5    | 0.5    | 0.5    | 0      | 0.5    | 0      | 0      | 0      | 1      | 0.5    | 0      | 0      | 0      | 0      | 0      | 0 |
| Saccharibacteria | GCA_010201925.1_ASM1020192v1 | FS17P                  | 1      | 0      | 0.5    | 1      | 0.5    | 0      | 0      | 0      | 0      | 0      | 0      | 0      | 0.5    | 0.5    | 0.5    | 0      | 0.5    | 0      | 0      | 0      | 1      | 0.5    | 0      | 0      | 0      | 0.5    | 0      | 0 |
| Saccharibacteria | GCA_013394755.1_ASM1339475v1 | HB001                  | 1      | 0      | 0      | 0      | 0.5    | 0      | 0      | 0      | 0      | 0      | 0      | 0      | 0.5    | 0.5    | 0.5    | 0      | 0.5    | 0      | 0      | 0      | 1      | 0.5    | 0      | 0      | 0      | 0      | 0      | 0 |
| host bacteria    | GCA_009914535.1_ASM991453v1  | G. pseudamarae BEN371  | 1      | 1      | 1      | 1      | 1      | 1      | 1      | 1      | 1      | 1      | 1      | 1      | 1      | 1      | 1      | 1      | 1      | 1      | 1      | 1      | 1      | 1      | 1      | 1      | 1      | 1      | 1      | 1 |
| host bacteria    | GCA_025268675.1_ASM2526867v1 | G. amarae BEN368       | 1      | 1      | 1      | 1      | 1      | 1      | 1      | 1      | 1      | 1      | 1      | 1      | 1      | 1      | 1      | 1      | 1      | 1      | 1      | 1      | 1      | 1      | 1      | 1      | 1      | 1      | 1      | 1 |
| host bacteria    | GCA_009914495.1_ASM991449v1  | G. amarae BEN374       | 1      | 1      | 1      | 1      | 1      | 1      | 1      | 1      | 1      | 1      | 1      | 1      | 1      | 1      | 1      | 1      | 1      | 1      | 1      | 1      | 1      | 1      | 1      | 1      | 1      | 1      | 1      | 1 |
| host bacteria    | CP045810.1                   | G. amarae CON44        | 1      | 1      | 1      | 1      | 1      | 1      | 1      | 1      | 1      | 1      | 1      | 1      | 1      | 1      | 1      | 1      | 1      | 1      | 1      | 1      | 1      | 1      | 1      | 1      | 1      | 1      | 1      | 1 |
| host bacteria    | GCA_009914515.1_ASM991451v1  | G. amarae BEN372       | 1      | 1      | 1      | 1      | 1      | 1      | 1      | 1      | 1      | 1      | 1      | 1      | 1      | 1      | 1      | 1      | 1      | 1      | 1      | 1      | 1      | 1      | 1      | 1      | 1      | 1      | 1      | 1 |
| host bacteria    | GCA_025273675.1_ASM2527367v1 | G. pseudamarae CON9    | 1      | 1      | 1      | 1      | 1      | 1      | 1      | 1      | 1      | 1      | 1      | 1      | 1      | 1      | 1      | 1      | 1      | 1      | 1      | 1      | 1      | 1      | 1      | 1      | 1      | 1      | 1      | 1 |
| Saccharibacteria | GCA_025273655.1_ASM2527365v1 | JR1                    | 0.5    | 0      | 0.5    | 1      | 0.5    | 1      | 0      | 0      | 0      | 0      | 0      | 0      | 0.5    | 0.5    | 0.5    | 0      | 0.5    | 0      | 0      | 0      | 1      | 0      | 0      | 0      | 0.5    | 0      | 0      | 0 |
| host bacteria    | GCA_024399335.1_ASM2439933v1 | L. aridicollis J1      | 1      | 1      | 1      | 1      | 0.5    | 0      | 1      | 1      | 1      | 1      | 1      | 1      | 1      | 1      | 1      | 1      | 1      | 1      | 1      | 1      | 1      | 1      | 0      | 0      | 1      | 1      | 1      | 1 |
| Saccharibacteria | GCA_025349965.1_ASM2534996v1 | TM7i                   | 0.5    | 0      | 0.5    | 1      | 0.5    | 0      | 0      | 0      | 0      | 0      | 0      | 0      | 0.5    | 0.5    | 0      | 0      | 0.5    | 0      | 0      | 0      | 1      | 0      | 0      | 0      | 0      | 0      | 0      | 0 |

# Supplementary Table 3b. KO in different modules of cocultured Saccharibacteira-host bacteria pairs.

| Genome                      | KO                                                                                                                                           | Module | Organism      |
|-----------------------------|----------------------------------------------------------------------------------------------------------------------------------------------|--------|---------------|
| GCA_001262055.1_ASM126205v1 | {'K01803', 'K00845', 'K00134', 'K01834', 'K00927', 'K00850', 'K01689', 'K01810', 'K00873', 'K01624', 'K00886'}                               | M00001 | host bacteria |
| GCA_001262055.1_ASM126205v1 | {'K01803', 'K00873', 'K00134', 'K01834', 'K00927', 'K01689'}                                                                                 | M00002 | host bacteria |
| GCA_001262055.1_ASM126205v1 | {'K00948'}                                                                                                                                   | M00005 | host bacteria |
| GCA_001262055.1_ASM126205v1 | {'K00036', 'K01057', 'K00033'}                                                                                                               | M00006 | host bacteria |
| GCA_001262055.1_ASM126205v1 | {'K01679', 'K01903', 'K00164', 'K00382', 'K01902', 'K00240', 'K00241', 'K00024', 'K00239', 'K00658'}                                         | M00011 | host bacteria |
| GCA_001262055.1_ASM126205v1 | {'K00286', 'K00931', 'K00147'}                                                                                                               | M00015 | host bacteria |
| GCA_001262055.1_ASM126205v1 | {'K00003', 'K12524', 'K00928', 'K00872', 'K01733', 'K00133'}                                                                                 | M00018 | host bacteria |
| GCA_001262055.1_ASM126205v1 | {'K00831', 'K00058', 'K01079'}                                                                                                               | M00020 | host bacteria |
| GCA_001262055.1_ASM126205v1 | {'K01626', 'K00014', 'K00800', 'K01736', 'K03785', 'K00891', 'K13829', 'K01735'}                                                             | M00022 | host bacteria |
| GCA_001262055.1_ASM126205v1 | {'K01939', 'K00873', 'K00940', 'K01756', 'K00939'}                                                                                           | M00049 | host bacteria |
| GCA_001262055.1_ASM126205v1 | {'K00873', 'K00940', 'K00942', 'K01951', 'K00088'}                                                                                           | M00050 | host bacteria |
| GCA_001262055.1_ASM126205v1 | {'K11263', 'K11533'}                                                                                                                         | M00082 | host bacteria |
| GCA_001262055.1_ASM126205v1 | {'K11533'}                                                                                                                                   | M00083 | host bacteria |
| GCA_001262055.1_ASM126205v1 | {'K01897'}                                                                                                                                   | M00086 | host bacteria |
| GCA_001262055.1_ASM126205v1 | {'K01918'}                                                                                                                                   | M00119 | host bacteria |
| GCA_001262055.1_ASM126205v1 | {'K00954', 'K00859', 'K13038', 'K00867'}                                                                                                     | M00120 | host bacteria |
| GCA_001262055.1_ASM126205v1 | {'K00330', 'K00333', 'K00342', 'K00340', 'K00335', 'K00341', 'K00336', 'K00338', 'K00331', 'K00332', 'K00339', 'K00334', 'K00343', 'K00337'} | M00144 | host bacteria |
| GCA_001262055.1_ASM126205v1 | {'K05576'}                                                                                                                                   | M00145 | host bacteria |
| GCA_001262055.1_ASM126205v1 | {'K00241', 'K00240', 'K00239'}                                                                                                               | M00149 | host bacteria |
| GCA_001262055.1_ASM126205v1 | {'K00425', 'K00426'}                                                                                                                         | M00153 | host bacteria |
| GCA_001262055.1_ASM126205v1 | {'K02113', 'K02109', 'K02114', 'K02111', 'K02112', 'K02110', 'K02108', 'K02115'}                                                             | M00157 | host bacteria |
| GCA_001262055.1_ASM126205v1 | {'K00382', 'K00163'}                                                                                                                         | M00307 | host bacteria |
| GCA_001262055.1_ASM126205v1 | {'K00925', 'K13788'}                                                                                                                         | M00579 | host bacteria |
| GCA_000163415.1_ASM16341v1  | {'K01803', 'K00845', 'K00134', 'K01834', 'K00927', 'K00850', 'K01689', 'K01810', 'K00873', 'K01624', 'K00886'}                               | M00001 | host bacteria |
| GCA_000163415.1_ASM16341v1  | {'K01803', 'K00873', 'K00134', 'K01834', 'K00927', 'K01689'}                                                                                 | M00002 | host bacteria |
| GCA_000163415.1_ASM16341v1  | {'K00948'}                                                                                                                                   | M00005 | host bacteria |
| GCA_000163415.1_ASM16341v1  | {'K00036', 'K01057', 'K00033'}                                                                                                               | M00006 | host bacteria |
| GCA_000163415.1_ASM16341v1  | {'K01679', 'K01903', 'K00164', 'K00382', 'K01902', 'K00240', 'K00241', 'K00024', 'K00239', 'K00658'}                                         | M00011 | host bacteria |
| GCA_000163415.1_ASM16341v1  | {'K00286', 'K00931', 'K00147'}                                                                                                               | M00015 | host bacteria |
| GCA_000163415.1_ASM16341v1  | {'K00003', 'K12524', 'K00928', 'K00872', 'K01733', 'K00133'}                                                                                 | M00018 | host bacteria |
| GCA_000163415.1_ASM16341v1  | {'K00831', 'K00058', 'K01079'}                                                                                                               | M00020 | host bacteria |
| GCA_000163415.1_ASM16341v1  | {'K01626', 'K00014', 'K00800', 'K01736', 'K03785', 'K00891', 'K13829', 'K01735'}                                                             | M00022 | host bacteria |
| GCA_000163415.1_ASM16341v1  | {'K01657', 'K01609', 'K01696', 'K00766', 'K01817', 'K01658', 'K01695'}                                                                       | M00023 | host bacteria |
| GCA_000163415.1_ASM16341v1  | {'K01588', 'K00602', 'K00764', 'K01923', 'K08289', 'K01589', 'K01952', 'K11788', 'K01756', 'K01933', 'K01945'}                               | M00048 | host bacteria |
| GCA_000163415.1_ASM16341v1  | {'K01939', 'K00873', 'K00940', 'K01756', 'K00939'}                                                                                           | M00049 | host bacteria |
| GCA_000163415.1_ASM16341v1  | {'K00873', 'K00940', 'K00942', 'K01951', 'K00088'}                                                                                           | M00050 | host bacteria |
| GCA_000163415.1_ASM16341v1  | {'K01465', 'K01955', 'K00226', 'K01956', 'K00254', 'K01591', 'K00762', 'K00609'}                                                             | M00051 | host bacteria |
| GCA_000163415.1_ASM16341v1  | {'K11263', 'K11533'}                                                                                                                         | M00082 | host bacteria |
| GCA_000163415.1_ASM16341v1  | {'K11533'}                                                                                                                                   | M00083 | host bacteria |
| GCA_000163415.1_ASM16341v1  | {'K01897'}                                                                                                                                   | M00086 | host bacteria |
| GCA_000163415.1_ASM16341v1  | {'K01918'}                                                                                                                                   | M00119 | host bacteria |
| GCA_000163415.1_ASM16341v1  | {'K00954', 'K00859', 'K13038', 'K00867'}                                                                                                     | M00120 | host bacteria |
| GCA_000163415.1_ASM16341v1  | {'K00330', 'K00333', 'K00342', 'K00340', 'K00335', 'K00341', 'K00336', 'K00338', 'K00331', 'K00332', 'K00339', 'K00334', 'K00343', 'K00337'} | M00144 | host bacteria |
| GCA_000163415.1_ASM16341v1  | {'K05576'}                                                                                                                                   | M00145 | host bacteria |
| GCA_000163415.1_ASM16341v1  | {'K00241', 'K00240', 'K00239'}                                                                                                               | M00149 | host bacteria |
| GCA_000163415.1_ASM16341v1  | {'K00425', 'K00426'}                                                                                                                         | M00153 | host bacteria |
| GCA_000163415.1_ASM16341v1  | {'K02113', 'K02109', 'K02114', 'K02111', 'K02112', 'K02110', 'K02108', 'K02115'}                                                             | M00157 | host bacteria |
| GCA_000163415.1_ASM16341v1  | {'K00382', 'K00163'}                                                                                                                         | M00307 | host bacteria |
| GCA_000163415.1_ASM16341v1  | {'K00052', 'K01649', 'K01703', 'K01704'}                                                                                                     | M00432 | host bacteria |
| GCA_000163415.1_ASM16341v1  | {'K00925', 'K13788'}                                                                                                                         | M00579 | host bacteria |
| GCA_005696695.1_ASM569669v1 | {'K01803', 'K00845', 'K00134', 'K01834', 'K00927', 'K00850', 'K01689', 'K01810', 'K00873', 'K01624', 'K00886'}                               | M00001 | host bacteria |
| GCA_005696695.1_ASM569669v1 | {'K01803', 'K00873', 'K00134', 'K01834', 'K00927', 'K01689'}                                                                                 | M00002 | host bacteria |



|                             |                                                                                                                                              |        |               |
|-----------------------------|----------------------------------------------------------------------------------------------------------------------------------------------|--------|---------------|
| GCA_005696695.1_ASM569669v1 | {'K00948'}                                                                                                                                   | M00005 | host bacteria |
| GCA_005696695.1_ASM569669v1 | {'K00036', 'K01057', 'K00033'}                                                                                                               | M00006 | host bacteria |
| GCA_005696695.1_ASM569669v1 | {'K01679', 'K01903', 'K00164', 'K00382', 'K01902', 'K00240', 'K00241', 'K00024', 'K00239', 'K00658'}                                         | M00011 | host bacteria |
| GCA_005696695.1_ASM569669v1 | {'K00286', 'K00931', 'K00147'}                                                                                                               | M00015 | host bacteria |
| GCA_005696695.1_ASM569669v1 | {'K00003', 'K12524', 'K00928', 'K00872', 'K01733', 'K00133'}                                                                                 | M00018 | host bacteria |
| GCA_005696695.1_ASM569669v1 | {'K00831', 'K00058', 'K01079'}                                                                                                               | M00020 | host bacteria |
| GCA_005696695.1_ASM569669v1 | {'K01626', 'K00014', 'K00800', 'K01736', 'K03785', 'K00891', 'K13829', 'K01735'}                                                             | M00022 | host bacteria |
| GCA_005696695.1_ASM569669v1 | {'K01657', 'K01609', 'K01696', 'K00766', 'K01817', 'K01658', 'K01695'}                                                                       | M00023 | host bacteria |
| GCA_005696695.1_ASM569669v1 | {'K01588', 'K00602', 'K00764', 'K01923', 'K08289', 'K01589', 'K01952', 'K11788', 'K01756', 'K01933', 'K01945'}                               | M00048 | host bacteria |
| GCA_005696695.1_ASM569669v1 | {'K01939', 'K00873', 'K00940', 'K01756', 'K00939'}                                                                                           | M00049 | host bacteria |
| GCA_005696695.1_ASM569669v1 | {'K00873', 'K00940', 'K00942', 'K01951', 'K00088'}                                                                                           | M00050 | host bacteria |
| GCA_005696695.1_ASM569669v1 | {'K01465', 'K01955', 'K00226', 'K01956', 'K00254', 'K01591', 'K00762', 'K00609'}                                                             | M00051 | host bacteria |
| GCA_005696695.1_ASM569669v1 | {'K11263', 'K11533'}                                                                                                                         | M00082 | host bacteria |
| GCA_005696695.1_ASM569669v1 | {'K11533'}                                                                                                                                   | M00083 | host bacteria |
| GCA_005696695.1_ASM569669v1 | {'K01897'}                                                                                                                                   | M00086 | host bacteria |
| GCA_005696695.1_ASM569669v1 | {'K01918'}                                                                                                                                   | M00119 | host bacteria |
| GCA_005696695.1_ASM569669v1 | {'K00954', 'K00859', 'K13038', 'K00867'}                                                                                                     | M00120 | host bacteria |
| GCA_005696695.1_ASM569669v1 | {'K00330', 'K00333', 'K00342', 'K00340', 'K00335', 'K00341', 'K00336', 'K00338', 'K00331', 'K00332', 'K00339', 'K00334', 'K00343', 'K00337'} | M00144 | host bacteria |
| GCA_005696695.1_ASM569669v1 | {'K05576'}                                                                                                                                   | M00145 | host bacteria |
| GCA_005696695.1_ASM569669v1 | {'K00241', 'K00240', 'K00239'}                                                                                                               | M00149 | host bacteria |
| GCA_005696695.1_ASM569669v1 | {'K00425', 'K00426'}                                                                                                                         | M00153 | host bacteria |
| GCA_005696695.1_ASM569669v1 | {'K02113', 'K02109', 'K02114', 'K02111', 'K02112', 'K02110', 'K02108', 'K02115'}                                                             | M00157 | host bacteria |
| GCA_005696695.1_ASM569669v1 | {'K00382', 'K00163'}                                                                                                                         | M00307 | host bacteria |
| GCA_005696695.1_ASM569669v1 | {'K00052', 'K01649', 'K01703', 'K01704'}                                                                                                     | M00432 | host bacteria |
| GCA_005696695.1_ASM569669v1 | {'K00925', 'K13788'}                                                                                                                         | M00579 | host bacteria |
| GCA_005696555.1_ASM569655v1 | {'K01803', 'K00845', 'K00134', 'K01834', 'K16370', 'K00927', 'K00850', 'K01689', 'K01810', 'K00873', 'K01624', 'K00886'}                     | M00001 | host bacteria |
| GCA_005696555.1_ASM569655v1 | {'K01803', 'K00873', 'K00134', 'K01834', 'K00927', 'K01689'}                                                                                 | M00002 | host bacteria |
| GCA_005696555.1_ASM569655v1 | {'K00948'}                                                                                                                                   | M00005 | host bacteria |
| GCA_005696555.1_ASM569655v1 | {'K00036', 'K01057', 'K00033'}                                                                                                               | M00006 | host bacteria |
| GCA_005696555.1_ASM569655v1 | {'K01679', 'K01903', 'K00164', 'K00382', 'K01902', 'K00240', 'K00241', 'K00024', 'K00239', 'K00658'}                                         | M00011 | host bacteria |
| GCA_005696555.1_ASM569655v1 | {'K00286', 'K00931', 'K00147'}                                                                                                               | M00015 | host bacteria |
| GCA_005696555.1_ASM569655v1 | {'K00003', 'K12524', 'K00928', 'K00872', 'K01733', 'K00133'}                                                                                 | M00018 | host bacteria |
| GCA_005696555.1_ASM569655v1 | {'K00831', 'K00058', 'K01079'}                                                                                                               | M00020 | host bacteria |
| GCA_005696555.1_ASM569655v1 | {'K01626', 'K00014', 'K00800', 'K03785', 'K01736', 'K13829', 'K01735'}                                                                       | M00022 | host bacteria |
| GCA_005696555.1_ASM569655v1 | {'K01657', 'K01609', 'K01696', 'K00766', 'K01817', 'K01658', 'K01695'}                                                                       | M00023 | host bacteria |
| GCA_005696555.1_ASM569655v1 | {'K01588', 'K00602', 'K00764', 'K01923', 'K08289', 'K01589', 'K01952', 'K11788', 'K01756', 'K01933', 'K01945'}                               | M00048 | host bacteria |
| GCA_005696555.1_ASM569655v1 | {'K01939', 'K00873', 'K00940', 'K01756', 'K00939'}                                                                                           | M00049 | host bacteria |
| GCA_005696555.1_ASM569655v1 | {'K00873', 'K00940', 'K00942', 'K01951', 'K00088'}                                                                                           | M00050 | host bacteria |
| GCA_005696555.1_ASM569655v1 | {'K01465', 'K01955', 'K00226', 'K01956', 'K00254', 'K01591', 'K00762', 'K00609'}                                                             | M00051 | host bacteria |
| GCA_005696555.1_ASM569655v1 | {'K11263', 'K11533'}                                                                                                                         | M00082 | host bacteria |
| GCA_005696555.1_ASM569655v1 | {'K00059', 'K09458', 'K11533'}                                                                                                               | M00083 | host bacteria |
| GCA_005696555.1_ASM569655v1 | {'K01897'}                                                                                                                                   | M00086 | host bacteria |
| GCA_005696555.1_ASM569655v1 | {'K01918'}                                                                                                                                   | M00119 | host bacteria |
| GCA_005696555.1_ASM569655v1 | {'K00954', 'K00859', 'K13038', 'K00867'}                                                                                                     | M00120 | host bacteria |
| GCA_005696555.1_ASM569655v1 | {'K00330', 'K00333', 'K00342', 'K00340', 'K00335', 'K00341', 'K00336', 'K00338', 'K00331', 'K00332', 'K00339', 'K00334', 'K00343', 'K00337'} | M00144 | host bacteria |
| GCA_005696555.1_ASM569655v1 | {'K05576'}                                                                                                                                   | M00145 | host bacteria |
| GCA_005696555.1_ASM569655v1 | {'K00241', 'K00240', 'K00239'}                                                                                                               | M00149 | host bacteria |
| GCA_005696555.1_ASM569655v1 | {'K00425', 'K00426'}                                                                                                                         | M00153 | host bacteria |
| GCA_005696555.1_ASM569655v1 | {'K02113', 'K02109', 'K02114', 'K02111', 'K02112', 'K02110', 'K02108', 'K02115'}                                                             | M00157 | host bacteria |
| GCA_005696555.1_ASM569655v1 | {'K00382', 'K00163'}                                                                                                                         | M00307 | host bacteria |
| GCA_005696555.1_ASM569655v1 | {'K00052', 'K01649', 'K01703', 'K01704'}                                                                                                     | M00432 | host bacteria |
| GCA_005696555.1_ASM569655v1 | {'K00925', 'K13788'}                                                                                                                         | M00579 | host bacteria |
| GCA_000466265.1_ASM46626v1  | {'K01803', 'K00845', 'K00134', 'K01834', 'K00927', 'K00850', 'K01689', 'K01810', 'K00873', 'K01624', 'K00886'}                               | M00001 | host bacteria |
| GCA_000466265.1_ASM46626v1  | {'K01803', 'K00873', 'K00134', 'K01834', 'K00927', 'K01689'}                                                                                 | M00002 | host bacteria |
| GCA_000466265.1_ASM46626v1  | {'K00948'}                                                                                                                                   | M00005 | host bacteria |
| GCA_000466265.1_ASM46626v1  | {'K00036', 'K01057', 'K00033'}                                                                                                               | M00006 | host bacteria |
| GCA_000466265.1_ASM46626v1  | {'K01679', 'K01903', 'K00164', 'K00382', 'K01902', 'K00240', 'K00241', 'K00024', 'K00239', 'K00658'}                                         | M00011 | host bacteria |
| GCA_000466265.1_ASM46626v1  | {'K00286', 'K00931', 'K00147'}                                                                                                               | M00015 | host bacteria |
| GCA_000466265.1_ASM46626v1  | {'K00003', 'K12524', 'K00928', 'K00872', 'K01733', 'K00133'}                                                                                 | M00018 | host bacteria |
| GCA_000466265.1_ASM46626v1  | {'K00831', 'K00058', 'K01079'}                                                                                                               | M00020 | host bacteria |
| GCA_000466265.1_ASM46626v1  | {'K01626', 'K00014', 'K00800', 'K01736', 'K03785', 'K00891', 'K13829', 'K01735'}                                                             | M00022 | host bacteria |
| GCA_000466265.1_ASM46626v1  | {'K01657', 'K01609', 'K01696', 'K00766', 'K01817', 'K01658', 'K01695'}                                                                       | M00023 | host bacteria |

|                            |                                                                                                                                              |        |               |
|----------------------------|----------------------------------------------------------------------------------------------------------------------------------------------|--------|---------------|
| GCA_000466265.1_ASM46626v1 | {'K01588', 'K00602', 'K00764', 'K01923', 'K08289', 'K01589', 'K01952', 'K11788', 'K01756', 'K01933', 'K01945'}                               | M00048 | host bacteria |
| GCA_000466265.1_ASM46626v1 | {'K01939', 'K00873', 'K00940', 'K01756', 'K00939'}                                                                                           | M00049 | host bacteria |
| GCA_000466265.1_ASM46626v1 | {'K00873', 'K00940', 'K00942', 'K01951', 'K00088'}                                                                                           | M00050 | host bacteria |
| GCA_000466265.1_ASM46626v1 | {'K01465', 'K01955', 'K00226', 'K01956', 'K00254', 'K01591', 'K00762', 'K00609'}                                                             | M00051 | host bacteria |
| GCA_000466265.1_ASM46626v1 | {'K11263', 'K11533'}                                                                                                                         | M00082 | host bacteria |
| GCA_000466265.1_ASM46626v1 | {'K11533'}                                                                                                                                   | M00083 | host bacteria |
| GCA_000466265.1_ASM46626v1 | {'K01897'}                                                                                                                                   | M00086 | host bacteria |
| GCA_000466265.1_ASM46626v1 | {'K01918'}                                                                                                                                   | M00119 | host bacteria |
| GCA_000466265.1_ASM46626v1 | {'K00954', 'K00859', 'K13038', 'K00867'}                                                                                                     | M00120 | host bacteria |
| GCA_000466265.1_ASM46626v1 | {'K00330', 'K00333', 'K00342', 'K00340', 'K00335', 'K00341', 'K00336', 'K00338', 'K00331', 'K00332', 'K00339', 'K00334', 'K00343', 'K00337'} | M00144 | host bacteria |
| GCA_000466265.1_ASM46626v1 | {'K05576'}                                                                                                                                   | M00145 | host bacteria |
| GCA_000466265.1_ASM46626v1 | {'K00241', 'K00240', 'K00239'}                                                                                                               | M00149 | host bacteria |
| GCA_000466265.1_ASM46626v1 | {'K00425', 'K00426'}                                                                                                                         | M00153 | host bacteria |
| GCA_000466265.1_ASM46626v1 | {'K02113', 'K02109', 'K02114', 'K02111', 'K02112', 'K02110', 'K02108', 'K02115'}                                                             | M00157 | host bacteria |
| GCA_000466265.1_ASM46626v1 | {'K00382', 'K00163'}                                                                                                                         | M00307 | host bacteria |
| GCA_000466265.1_ASM46626v1 | {'K00052', 'K01649', 'K01703', 'K01704'}                                                                                                     | M00432 | host bacteria |
| GCA_000466265.1_ASM46626v1 | {'K00925', 'K13788'}                                                                                                                         | M00579 | host bacteria |
| GCA_000186685.1_ASM18668v1 | {'K01803', 'K00845', 'K00134', 'K01834', 'K00927', 'K00850', 'K01689', 'K01810', 'K00873', 'K01624', 'K00886'}                               | M00001 | host bacteria |
| GCA_000186685.1_ASM18668v1 | {'K01803', 'K00873', 'K00134', 'K01834', 'K00927', 'K01689'}                                                                                 | M00002 | host bacteria |
| GCA_000186685.1_ASM18668v1 | {'K00948'}                                                                                                                                   | M00005 | host bacteria |
| GCA_000186685.1_ASM18668v1 | {'K00036', 'K01057', 'K00033'}                                                                                                               | M00006 | host bacteria |
| GCA_000186685.1_ASM18668v1 | {'K01679', 'K01903', 'K00164', 'K00382', 'K01902', 'K00240', 'K00241', 'K00024', 'K00239', 'K00658'}                                         | M00011 | host bacteria |
| GCA_000186685.1_ASM18668v1 | {'K00286', 'K00931', 'K00147'}                                                                                                               | M00015 | host bacteria |
| GCA_000186685.1_ASM18668v1 | {'K00003', 'K12524', 'K00928', 'K00872', 'K01733', 'K00133'}                                                                                 | M00018 | host bacteria |
| GCA_000186685.1_ASM18668v1 | {'K00831', 'K00058', 'K01079'}                                                                                                               | M00020 | host bacteria |
| GCA_000186685.1_ASM18668v1 | {'K01626', 'K00014', 'K00800', 'K03785', 'K01736', 'K13829', 'K01735'}                                                                       | M00022 | host bacteria |
| GCA_000186685.1_ASM18668v1 | {'K01657', 'K01609', 'K01696', 'K00766', 'K01817', 'K01658', 'K01695'}                                                                       | M00023 | host bacteria |
| GCA_000186685.1_ASM18668v1 | {'K01588', 'K00602', 'K00764', 'K01923', 'K08289', 'K01952', 'K11788', 'K01756', 'K01933', 'K01945'}                                         | M00048 | host bacteria |
| GCA_000186685.1_ASM18668v1 | {'K01939', 'K00873', 'K00940', 'K01756', 'K00939'}                                                                                           | M00049 | host bacteria |
| GCA_000186685.1_ASM18668v1 | {'K00873', 'K00940', 'K00942', 'K01951', 'K00088'}                                                                                           | M00050 | host bacteria |
| GCA_000186685.1_ASM18668v1 | {'K01465', 'K01955', 'K00226', 'K01956', 'K00254', 'K01591', 'K00762', 'K00609'}                                                             | M00051 | host bacteria |
| GCA_000186685.1_ASM18668v1 | {'K11263', 'K11533'}                                                                                                                         | M00082 | host bacteria |
| GCA_000186685.1_ASM18668v1 | {'K11533'}                                                                                                                                   | M00083 | host bacteria |
| GCA_000186685.1_ASM18668v1 | {'K01897'}                                                                                                                                   | M00086 | host bacteria |
| GCA_000186685.1_ASM18668v1 | {'K01918'}                                                                                                                                   | M00119 | host bacteria |
| GCA_000186685.1_ASM18668v1 | {'K00954', 'K00859', 'K13038', 'K00867'}                                                                                                     | M00120 | host bacteria |
| GCA_000186685.1_ASM18668v1 | {'K00330', 'K00333', 'K00342', 'K00340', 'K00335', 'K00341', 'K00338', 'K00331', 'K00332', 'K00339', 'K00334', 'K00343', 'K00337'}           | M00144 | host bacteria |
| GCA_000186685.1_ASM18668v1 | {'K05576'}                                                                                                                                   | M00145 | host bacteria |
| GCA_000186685.1_ASM18668v1 | {'K00241', 'K00240', 'K00239'}                                                                                                               | M00149 | host bacteria |
| GCA_000186685.1_ASM18668v1 | {'K00425'}                                                                                                                                   | M00153 | host bacteria |
| GCA_000186685.1_ASM18668v1 | {'K02113', 'K02109', 'K02114', 'K02111', 'K02112', 'K02110', 'K02108', 'K02115'}                                                             | M00157 | host bacteria |
| GCA_000186685.1_ASM18668v1 | {'K00382', 'K00163'}                                                                                                                         | M00307 | host bacteria |
| GCA_000186685.1_ASM18668v1 | {'K00052', 'K01649', 'K01703', 'K01704'}                                                                                                     | M00432 | host bacteria |
| GCA_000186685.1_ASM18668v1 | {'K00925', 'K13788'}                                                                                                                         | M00579 | host bacteria |
| GCA_000466305.1_ASM46630v1 | {'K01803', 'K00845', 'K00134', 'K01834', 'K00927', 'K00850', 'K01689', 'K01810', 'K00873', 'K01624', 'K00886'}                               | M00001 | host bacteria |
| GCA_000466305.1_ASM46630v1 | {'K01803', 'K00873', 'K00134', 'K01834', 'K00927', 'K01689'}                                                                                 | M00002 | host bacteria |
| GCA_000466305.1_ASM46630v1 | {'K00948'}                                                                                                                                   | M00005 | host bacteria |
| GCA_000466305.1_ASM46630v1 | {'K00036', 'K01057', 'K00033'}                                                                                                               | M00006 | host bacteria |
| GCA_000466305.1_ASM46630v1 | {'K01679', 'K01903', 'K00164', 'K00382', 'K01902', 'K00240', 'K00241', 'K00024', 'K00239', 'K00658'}                                         | M00011 | host bacteria |
| GCA_000466305.1_ASM46630v1 | {'K00286', 'K00931', 'K00147'}                                                                                                               | M00015 | host bacteria |
| GCA_000466305.1_ASM46630v1 | {'K00003', 'K12524', 'K00928', 'K00872', 'K01733', 'K00133'}                                                                                 | M00018 | host bacteria |
| GCA_000466305.1_ASM46630v1 | {'K00831', 'K00058', 'K01079'}                                                                                                               | M00020 | host bacteria |
| GCA_000466305.1_ASM46630v1 | {'K01626', 'K00014', 'K00800', 'K03785', 'K01736', 'K13829', 'K01735'}                                                                       | M00022 | host bacteria |
| GCA_000466305.1_ASM46630v1 | {'K01657', 'K01696', 'K01817', 'K01658', 'K01609', 'K01695'}                                                                                 | M00023 | host bacteria |
| GCA_000466305.1_ASM46630v1 | {'K01588', 'K00602', 'K00764', 'K01923', 'K08289', 'K01589', 'K01952', 'K11788', 'K01756', 'K01933', 'K01945'}                               | M00048 | host bacteria |
| GCA_000466305.1_ASM46630v1 | {'K01939', 'K00873', 'K00940', 'K01756', 'K00939'}                                                                                           | M00049 | host bacteria |
| GCA_000466305.1_ASM46630v1 | {'K00873', 'K00940', 'K00942', 'K01951', 'K00088'}                                                                                           | M00050 | host bacteria |
| GCA_000466305.1_ASM46630v1 | {'K01465', 'K01955', 'K00226', 'K01956', 'K00254', 'K01591', 'K00762', 'K00609'}                                                             | M00051 | host bacteria |
| GCA_000466305.1_ASM46630v1 | {'K11263', 'K11533'}                                                                                                                         | M00082 | host bacteria |
| GCA_000466305.1_ASM46630v1 | {'K11533'}                                                                                                                                   | M00083 | host bacteria |
| GCA_000466305.1_ASM46630v1 | {'K01897'}                                                                                                                                   | M00086 | host bacteria |
| GCA_000466305.1_ASM46630v1 | {'K01918'}                                                                                                                                   | M00119 | host bacteria |

|                             |                                                                                                                                              |        |               |
|-----------------------------|----------------------------------------------------------------------------------------------------------------------------------------------|--------|---------------|
| GCA_000466305.1_ASM46630v1  | {'K00954', 'K00859', 'K13038', 'K00867'}                                                                                                     | M00120 | host bacteria |
| GCA_000466305.1_ASM46630v1  | {'K00330', 'K00333', 'K00342', 'K00340', 'K00335', 'K00341', 'K00336', 'K00338', 'K00331', 'K00332', 'K00339', 'K00334', 'K00343', 'K00337'} | M00144 | host bacteria |
| GCA_000466305.1_ASM46630v1  | {'K05576'}                                                                                                                                   | M00145 | host bacteria |
| GCA_000466305.1_ASM46630v1  | {'K00241', 'K00240', 'K00239'}                                                                                                               | M00149 | host bacteria |
| GCA_000466305.1_ASM46630v1  | {'K00425', 'K00426'}                                                                                                                         | M00153 | host bacteria |
| GCA_000466305.1_ASM46630v1  | {'K02113', 'K02109', 'K02114', 'K02111', 'K02112', 'K02110', 'K02108', 'K02115'}                                                             | M00157 | host bacteria |
| GCA_000466305.1_ASM46630v1  | {'K00382', 'K00163'}                                                                                                                         | M00307 | host bacteria |
| GCA_000466305.1_ASM46630v1  | {'K00052', 'K01649', 'K01703', 'K01704'}                                                                                                     | M00432 | host bacteria |
| GCA_000466305.1_ASM46630v1  | {'K00925', 'K13788'}                                                                                                                         | M00579 | host bacteria |
| GCA_002999235.1_ASM299923v1 | {'K01803', 'K00845', 'K00134', 'K01834', 'K16370', 'K15634', 'K00927', 'K00850', 'K01623', 'K01689', 'K01810', 'K00873', 'K01624', 'K00886'} | M00001 | host bacteria |
| GCA_002999235.1_ASM299923v1 | {'K01803', 'K00873', 'K00134', 'K01834', 'K15634', 'K00927', 'K01689'}                                                                       | M00002 | host bacteria |
| GCA_002999235.1_ASM299923v1 | {'K00948'}                                                                                                                                   | M00005 | host bacteria |
| GCA_002999235.1_ASM299923v1 | {'K00036', 'K01057', 'K00033'}                                                                                                               | M00006 | host bacteria |
| GCA_002999235.1_ASM299923v1 | {'K01679', 'K01903', 'K00164', 'K00382', 'K01902', 'K00240', 'K00241', 'K00024', 'K00239', 'K00658'}                                         | M00011 | host bacteria |
| GCA_002999235.1_ASM299923v1 | {'K00286', 'K00931', 'K00147'}                                                                                                               | M00015 | host bacteria |
| GCA_002999235.1_ASM299923v1 | {'K00003', 'K12524', 'K00928', 'K00872', 'K01733', 'K00133'}                                                                                 | M00018 | host bacteria |
| GCA_002999235.1_ASM299923v1 | {'K00831', 'K00058', 'K01079'}                                                                                                               | M00020 | host bacteria |
| GCA_002999235.1_ASM299923v1 | {'K01626', 'K00014', 'K00800', 'K03785', 'K01736', 'K13829', 'K01735'}                                                                       | M00022 | host bacteria |
| GCA_002999235.1_ASM299923v1 | {'K01657', 'K01696', 'K00766', 'K01817', 'K01609', 'K01695'}                                                                                 | M00023 | host bacteria |
| GCA_002999235.1_ASM299923v1 | {'K01588', 'K00602', 'K00764', 'K01923', 'K08289', 'K01589', 'K01952', 'K11788', 'K01756', 'K01933', 'K01945'}                               | M00048 | host bacteria |
| GCA_002999235.1_ASM299923v1 | {'K01939', 'K00873', 'K00940', 'K01756', 'K00939'}                                                                                           | M00049 | host bacteria |
| GCA_002999235.1_ASM299923v1 | {'K00873', 'K00940', 'K00942', 'K01951', 'K00088'}                                                                                           | M00050 | host bacteria |
| GCA_002999235.1_ASM299923v1 | {'K01465', 'K01955', 'K00226', 'K01956', 'K00254', 'K01591', 'K00762', 'K00609'}                                                             | M00051 | host bacteria |
| GCA_002999235.1_ASM299923v1 | {'K11263', 'K11533'}                                                                                                                         | M00082 | host bacteria |
| GCA_002999235.1_ASM299923v1 | {'K09458', 'K11533'}                                                                                                                         | M00083 | host bacteria |
| GCA_002999235.1_ASM299923v1 | {'K01897'}                                                                                                                                   | M00086 | host bacteria |
| GCA_002999235.1_ASM299923v1 | {'K01918'}                                                                                                                                   | M00119 | host bacteria |
| GCA_002999235.1_ASM299923v1 | {'K00954', 'K00859', 'K13038', 'K00867'}                                                                                                     | M00120 | host bacteria |
| GCA_002999235.1_ASM299923v1 | {'K00330', 'K00333', 'K00342', 'K00340', 'K00335', 'K00341', 'K00336', 'K00338', 'K00331', 'K00332', 'K00339', 'K00334', 'K00343', 'K00337'} | M00144 | host bacteria |
| GCA_002999235.1_ASM299923v1 | {'K05576'}                                                                                                                                   | M00145 | host bacteria |
| GCA_002999235.1_ASM299923v1 | {'K00241', 'K00240', 'K00239'}                                                                                                               | M00149 | host bacteria |
| GCA_002999235.1_ASM299923v1 | {'K00425', 'K00426'}                                                                                                                         | M00153 | host bacteria |
| GCA_002999235.1_ASM299923v1 | {'K02113', 'K02109', 'K02114', 'K02111', 'K02112', 'K02110', 'K02108', 'K02115'}                                                             | M00157 | host bacteria |
| GCA_002999235.1_ASM299923v1 | {'K00382', 'K00163'}                                                                                                                         | M00307 | host bacteria |
| GCA_002999235.1_ASM299923v1 | {'K00052', 'K01649', 'K01703', 'K01704'}                                                                                                     | M00432 | host bacteria |
| GCA_002999235.1_ASM299923v1 | {'K00925', 'K13788'}                                                                                                                         | M00579 | host bacteria |
| GCA_000185285.1_ASM18528v1  | {'K01803', 'K00845', 'K00134', 'K01834', 'K00927', 'K00850', 'K01689', 'K01810', 'K00873', 'K01624', 'K00886'}                               | M00001 | host bacteria |
| GCA_000185285.1_ASM18528v1  | {'K01803', 'K00873', 'K00134', 'K01834', 'K00927', 'K01689'}                                                                                 | M00002 | host bacteria |
| GCA_000185285.1_ASM18528v1  | {'K00948'}                                                                                                                                   | M00005 | host bacteria |
| GCA_000185285.1_ASM18528v1  | {'K00036', 'K01057', 'K00033'}                                                                                                               | M00006 | host bacteria |
| GCA_000185285.1_ASM18528v1  | {'K01679', 'K01903', 'K00164', 'K00382', 'K01902', 'K00240', 'K00241', 'K00024', 'K00239', 'K00658'}                                         | M00011 | host bacteria |
| GCA_000185285.1_ASM18528v1  | {'K00286', 'K00931', 'K00147'}                                                                                                               | M00015 | host bacteria |
| GCA_000185285.1_ASM18528v1  | {'K00003', 'K12524', 'K00928', 'K00872', 'K01733', 'K00133'}                                                                                 | M00018 | host bacteria |
| GCA_000185285.1_ASM18528v1  | {'K00831', 'K00058', 'K01079'}                                                                                                               | M00020 | host bacteria |
| GCA_000185285.1_ASM18528v1  | {'K01626', 'K00014', 'K00800', 'K01736', 'K03785', 'K00891', 'K13829', 'K01735'}                                                             | M00022 | host bacteria |
| GCA_000185285.1_ASM18528v1  | {'K01657', 'K01609', 'K01696', 'K00766', 'K01817', 'K01658', 'K01695'}                                                                       | M00023 | host bacteria |
| GCA_000185285.1_ASM18528v1  | {'K01588', 'K00602', 'K00764', 'K01923', 'K08289', 'K01589', 'K01952', 'K11788', 'K01756', 'K01933', 'K01945'}                               | M00048 | host bacteria |
| GCA_000185285.1_ASM18528v1  | {'K01939', 'K00873', 'K00940', 'K01756', 'K00939'}                                                                                           | M00049 | host bacteria |
| GCA_000185285.1_ASM18528v1  | {'K00873', 'K00940', 'K00942', 'K01951', 'K00088'}                                                                                           | M00050 | host bacteria |
| GCA_000185285.1_ASM18528v1  | {'K01465', 'K01955', 'K00226', 'K01956', 'K00254', 'K01591', 'K00762', 'K00609'}                                                             | M00051 | host bacteria |
| GCA_000185285.1_ASM18528v1  | {'K11263', 'K11533'}                                                                                                                         | M00082 | host bacteria |
| GCA_000185285.1_ASM18528v1  | {'K11533'}                                                                                                                                   | M00083 | host bacteria |
| GCA_000185285.1_ASM18528v1  | {'K01897'}                                                                                                                                   | M00086 | host bacteria |
| GCA_000185285.1_ASM18528v1  | {'K01918'}                                                                                                                                   | M00119 | host bacteria |
| GCA_000185285.1_ASM18528v1  | {'K00954', 'K00859', 'K13038', 'K00867'}                                                                                                     | M00120 | host bacteria |
| GCA_000185285.1_ASM18528v1  | {'K00330', 'K00333', 'K00342', 'K00340', 'K00335', 'K00341', 'K00336', 'K00338', 'K00331', 'K00332', 'K00339', 'K00334', 'K00343', 'K00337'} | M00144 | host bacteria |
| GCA_000185285.1_ASM18528v1  | {'K05576'}                                                                                                                                   | M00145 | host bacteria |
| GCA_000185285.1_ASM18528v1  | {'K00241', 'K00240', 'K00239'}                                                                                                               | M00149 | host bacteria |
| GCA_000185285.1_ASM18528v1  | {'K00425', 'K00426'}                                                                                                                         | M00153 | host bacteria |
| GCA_000185285.1_ASM18528v1  | {'K02113', 'K02109', 'K02114', 'K02111', 'K02112', 'K02110', 'K02108', 'K02115'}                                                             | M00157 | host bacteria |
| GCA_000185285.1_ASM18528v1  | {'K00382', 'K00163'}                                                                                                                         | M00307 | host bacteria |
| GCA_000185285.1_ASM18528v1  | {'K00052', 'K01649', 'K01703', 'K01704'}                                                                                                     | M00432 | host bacteria |



|                              |                                                                                                                                                        |        |               |
|------------------------------|--------------------------------------------------------------------------------------------------------------------------------------------------------|--------|---------------|
| GCA_000185285.1_ASM18528v1   | {'K00925', 'K13788'}                                                                                                                                   | M00579 | host bacteria |
| GCA_000282935.1_AspICM39v1.0 | {'K01803', 'K00845', 'K00134', 'K01834', 'K00927', 'K00850', 'K01689', 'K01810', 'K00873', 'K01624', 'K00886'}                                         | M00001 | host bacteria |
| GCA_000282935.1_AspICM39v1.0 | {'K01803', 'K00873', 'K00134', 'K01834', 'K00927', 'K01689'}                                                                                           | M00002 | host bacteria |
| GCA_000282935.1_AspICM39v1.0 | {'K00948'}                                                                                                                                             | M00005 | host bacteria |
| GCA_000282935.1_AspICM39v1.0 | {'K00036', 'K01057', 'K00033'}                                                                                                                         | M00006 | host bacteria |
| GCA_000282935.1_AspICM39v1.0 | {'K01679', 'K01903', 'K00164', 'K00382', 'K01902', 'K00240', 'K00241', 'K00024', 'K00239', 'K00658'}                                                   | M00011 | host bacteria |
| GCA_000282935.1_AspICM39v1.0 | {'K00286', 'K00931', 'K00147'}                                                                                                                         | M00015 | host bacteria |
| GCA_000282935.1_AspICM39v1.0 | {'K00003', 'K12524', 'K00928', 'K00872', 'K01733', 'K00133'}                                                                                           | M00018 | host bacteria |
| GCA_000282935.1_AspICM39v1.0 | {'K00831', 'K00058', 'K01079'}                                                                                                                         | M00020 | host bacteria |
| GCA_000282935.1_AspICM39v1.0 | {'K01626', 'K00014', 'K00800', 'K01736', 'K03785', 'K00891', 'K13829', 'K01735'}                                                                       | M00022 | host bacteria |
| GCA_000282935.1_AspICM39v1.0 | {'K01657', 'K01609', 'K01696', 'K00766', 'K01817', 'K01658', 'K01695'}                                                                                 | M00023 | host bacteria |
| GCA_000282935.1_AspICM39v1.0 | {'K01588', 'K00602', 'K00764', 'K01923', 'K08289', 'K01589', 'K01952', 'K11788', 'K01756', 'K01933', 'K01945'}                                         | M00048 | host bacteria |
| GCA_000282935.1_AspICM39v1.0 | {'K01939', 'K00873', 'K00940', 'K01756', 'K00939'}                                                                                                     | M00049 | host bacteria |
| GCA_000282935.1_AspICM39v1.0 | {'K00873', 'K00940', 'K00942', 'K01951', 'K00088'}                                                                                                     | M00050 | host bacteria |
| GCA_000282935.1_AspICM39v1.0 | {'K01465', 'K01955', 'K00226', 'K01956', 'K00254', 'K01591', 'K00762', 'K00609'}                                                                       | M00051 | host bacteria |
| GCA_000282935.1_AspICM39v1.0 | {'K11263', 'K11533'}                                                                                                                                   | M00082 | host bacteria |
| GCA_000282935.1_AspICM39v1.0 | {'K11533'}                                                                                                                                             | M00083 | host bacteria |
| GCA_000282935.1_AspICM39v1.0 | {'K01897'}                                                                                                                                             | M00086 | host bacteria |
| GCA_000282935.1_AspICM39v1.0 | {'K01918'}                                                                                                                                             | M00119 | host bacteria |
| GCA_000282935.1_AspICM39v1.0 | {'K00954', 'K00859', 'K13038', 'K00867'}                                                                                                               | M00120 | host bacteria |
| GCA_000282935.1_AspICM39v1.0 | {'K00330', 'K00333', 'K00342', 'K00340', 'K00335', 'K00341', 'K00336', 'K00338', 'K00331', 'K00332', 'K00339', 'K00334', 'K00343', 'K00337'}           | M00144 | host bacteria |
| GCA_000282935.1_AspICM39v1.0 | {'K05576'}                                                                                                                                             | M00145 | host bacteria |
| GCA_000282935.1_AspICM39v1.0 | {'K00241', 'K00240', 'K00239'}                                                                                                                         | M00149 | host bacteria |
| GCA_000282935.1_AspICM39v1.0 | {'K00425', 'K00426'}                                                                                                                                   | M00153 | host bacteria |
| GCA_000282935.1_AspICM39v1.0 | {'K02113', 'K02109', 'K02114', 'K02111', 'K02112', 'K02110', 'K02108', 'K02115'}                                                                       | M00157 | host bacteria |
| GCA_000282935.1_AspICM39v1.0 | {'K00382', 'K00163'}                                                                                                                                   | M00307 | host bacteria |
| GCA_000282935.1_AspICM39v1.0 | {'K00052', 'K01649', 'K01703', 'K01704'}                                                                                                               | M00432 | host bacteria |
| GCA_000282935.1_AspICM39v1.0 | {'K00925', 'K13788'}                                                                                                                                   | M00579 | host bacteria |
| GCA_000283035.1_AspICM58v1.0 | {'K01803', 'K00845', 'K00134', 'K01834', 'K00927', 'K00850', 'K01689', 'K01810', 'K00873', 'K01624', 'K00886'}                                         | M00001 | host bacteria |
| GCA_000283035.1_AspICM58v1.0 | {'K01803', 'K00873', 'K00134', 'K01834', 'K00927', 'K01689'}                                                                                           | M00002 | host bacteria |
| GCA_000283035.1_AspICM58v1.0 | {'K00948'}                                                                                                                                             | M00005 | host bacteria |
| GCA_000283035.1_AspICM58v1.0 | {'K00036', 'K01057', 'K00033'}                                                                                                                         | M00006 | host bacteria |
| GCA_000283035.1_AspICM58v1.0 | {'K01679', 'K01903', 'K00164', 'K00382', 'K01902', 'K00240', 'K00241', 'K00024', 'K00239', 'K00658'}                                                   | M00011 | host bacteria |
| GCA_000283035.1_AspICM58v1.0 | {'K00286', 'K00931', 'K00147'}                                                                                                                         | M00015 | host bacteria |
| GCA_000283035.1_AspICM58v1.0 | {'K00003', 'K12524', 'K00928', 'K00872', 'K01733', 'K00133'}                                                                                           | M00018 | host bacteria |
| GCA_000283035.1_AspICM58v1.0 | {'K00831', 'K00058', 'K01079'}                                                                                                                         | M00020 | host bacteria |
| GCA_000283035.1_AspICM58v1.0 | {'K01626', 'K00014', 'K00800', 'K01736', 'K03785', 'K00891', 'K13829', 'K01735'}                                                                       | M00022 | host bacteria |
| GCA_000283035.1_AspICM58v1.0 | {'K01657', 'K01609', 'K01696', 'K00766', 'K01817', 'K01658', 'K01695'}                                                                                 | M00023 | host bacteria |
| GCA_000283035.1_AspICM58v1.0 | {'K01588', 'K00602', 'K00764', 'K01923', 'K08289', 'K01589', 'K01952', 'K11788', 'K01756', 'K01933', 'K01945'}                                         | M00048 | host bacteria |
| GCA_000283035.1_AspICM58v1.0 | {'K01939', 'K00873', 'K00940', 'K01756', 'K00939'}                                                                                                     | M00049 | host bacteria |
| GCA_000283035.1_AspICM58v1.0 | {'K00873', 'K00940', 'K00942', 'K01951', 'K00088'}                                                                                                     | M00050 | host bacteria |
| GCA_000283035.1_AspICM58v1.0 | {'K01465', 'K01955', 'K00226', 'K01956', 'K00254', 'K01591', 'K00762', 'K00609'}                                                                       | M00051 | host bacteria |
| GCA_000283035.1_AspICM58v1.0 | {'K11263', 'K11533'}                                                                                                                                   | M00082 | host bacteria |
| GCA_000283035.1_AspICM58v1.0 | {'K11533'}                                                                                                                                             | M00083 | host bacteria |
| GCA_000283035.1_AspICM58v1.0 | {'K01897'}                                                                                                                                             | M00086 | host bacteria |
| GCA_000283035.1_AspICM58v1.0 | {'K01918'}                                                                                                                                             | M00119 | host bacteria |
| GCA_000283035.1_AspICM58v1.0 | {'K00954', 'K00859', 'K13038', 'K00867'}                                                                                                               | M00120 | host bacteria |
| GCA_000283035.1_AspICM58v1.0 | {'K00330', 'K00333', 'K00342', 'K00340', 'K00335', 'K00341', 'K00336', 'K00338', 'K00331', 'K00332', 'K00339', 'K00334', 'K00343', 'K00337'}           | M00144 | host bacteria |
| GCA_000283035.1_AspICM58v1.0 | {'K05576'}                                                                                                                                             | M00145 | host bacteria |
| GCA_000283035.1_AspICM58v1.0 | {'K00241', 'K00240', 'K00239'}                                                                                                                         | M00149 | host bacteria |
| GCA_000283035.1_AspICM58v1.0 | {'K00425', 'K00426'}                                                                                                                                   | M00153 | host bacteria |
| GCA_000283035.1_AspICM58v1.0 | {'K02113', 'K02109', 'K02114', 'K02111', 'K02112', 'K02110', 'K02108', 'K02115'}                                                                       | M00157 | host bacteria |
| GCA_000283035.1_AspICM58v1.0 | {'K00382', 'K00163'}                                                                                                                                   | M00307 | host bacteria |
| GCA_000283035.1_AspICM58v1.0 | {'K00052', 'K01649', 'K01703', 'K01704'}                                                                                                               | M00432 | host bacteria |
| GCA_000283035.1_AspICM58v1.0 | {'K00925', 'K13788'}                                                                                                                                   | M00579 | host bacteria |
| GCA_025268675.1_ASM2526867v1 | {'K01803', 'K00845', 'K00134', 'K01834', 'K16370', 'K00927', 'K15916', 'K11645', 'K01689', 'K01810', 'K00873', 'K01624', 'K00886'}                     | M00001 | host bacteria |
| GCA_025268675.1_ASM2526867v1 | {'K01803', 'K00873', 'K00134', 'K01834', 'K00927', 'K01689'}                                                                                           | M00002 | host bacteria |
| GCA_025268675.1_ASM2526867v1 | {'K00948'}                                                                                                                                             | M00005 | host bacteria |
| GCA_025268675.1_ASM2526867v1 | {'K00036', 'K01057', 'K00033'}                                                                                                                         | M00006 | host bacteria |
| GCA_025268675.1_ASM2526867v1 | {'K01679', 'K01676', 'K00116', 'K01903', 'K00239', 'K00242', 'K00382', 'K01678', 'K01902', 'K00240', 'K00241', 'K00024', 'K18118', 'K00164', 'K00658'} | M00011 | host bacteria |
| GCA_025268675.1_ASM2526867v1 | {'K00286', 'K00931', 'K00147'}                                                                                                                         | M00015 | host bacteria |
| GCA_025268675.1_ASM2526867v1 | {'K00003', 'K12524', 'K00928', 'K00872', 'K01733', 'K00133'}                                                                                           | M00018 | host bacteria |

|                              |                                                                                                                                                        |        |               |
|------------------------------|--------------------------------------------------------------------------------------------------------------------------------------------------------|--------|---------------|
| GCA_025268675.1_ASM2526867v1 | {'K00831', 'K00058', 'K01079'}                                                                                                                         | M00020 | host bacteria |
| GCA_025268675.1_ASM2526867v1 | {'K01626', 'K00800', 'K03786', 'K01736', 'K00014', 'K00891', 'K13829', 'K01735'}                                                                       | M00022 | host bacteria |
| GCA_025268675.1_ASM2526867v1 | {'K01657', 'K01609', 'K06001', 'K01696', 'K00766', 'K01817', 'K01658', 'K01695'}                                                                       | M00023 | host bacteria |
| GCA_025268675.1_ASM2526867v1 | {'K01588', 'K00602', 'K00764', 'K01923', 'K08289', 'K01589', 'K01952', 'K11788', 'K01756', 'K01933', 'K01945', 'K11175'}                               | M00048 | host bacteria |
| GCA_025268675.1_ASM2526867v1 | {'K01939', 'K00873', 'K00940', 'K01756', 'K00939'}                                                                                                     | M00049 | host bacteria |
| GCA_025268675.1_ASM2526867v1 | {'K00873', 'K00940', 'K00942', 'K01951', 'K00088'}                                                                                                     | M00050 | host bacteria |
| GCA_025268675.1_ASM2526867v1 | {'K01465', 'K01955', 'K00226', 'K01956', 'K00254', 'K01591', 'K00762', 'K00609'}                                                                       | M00051 | host bacteria |
| GCA_025268675.1_ASM2526867v1 | {'K11263', 'K00645', 'K18472', 'K11533', 'K00648', 'K02160'}                                                                                           | M00082 | host bacteria |
| GCA_025268675.1_ASM2526867v1 | {'K11533', 'K09458', 'K00059', 'K00208', 'K02371'}                                                                                                     | M00083 | host bacteria |
| GCA_025268675.1_ASM2526867v1 | {'K01897'}                                                                                                                                             | M00086 | host bacteria |
| GCA_025268675.1_ASM2526867v1 | {'K01918'}                                                                                                                                             | M00119 | host bacteria |
| GCA_025268675.1_ASM2526867v1 | {'K13038', 'K00954', 'K03525', 'K00859', 'K00867'}                                                                                                     | M00120 | host bacteria |
| GCA_025268675.1_ASM2526867v1 | {'K00330', 'K00333', 'K00342', 'K00340', 'K00335', 'K00341', 'K00336', 'K00338', 'K00331', 'K00332', 'K00339', 'K00334', 'K00343', 'K00337'}           | M00144 | host bacteria |
| GCA_025268675.1_ASM2526867v1 | {'K05576'}                                                                                                                                             | M00145 | host bacteria |
| GCA_025268675.1_ASM2526867v1 | {'K00241', 'K00242', 'K00240', 'K00239'}                                                                                                               | M00149 | host bacteria |
| GCA_025268675.1_ASM2526867v1 | {'K00425', 'K00426'}                                                                                                                                   | M00153 | host bacteria |
| GCA_025268675.1_ASM2526867v1 | {'K02113', 'K02109', 'K02114', 'K02111', 'K02112', 'K02110', 'K02108', 'K02115'}                                                                       | M00157 | host bacteria |
| GCA_025268675.1_ASM2526867v1 | {'K00161', 'K00627', 'K00162', 'K00382', 'K00163'}                                                                                                     | M00307 | host bacteria |
| GCA_025268675.1_ASM2526867v1 | {'K00052', 'K01649', 'K01703', 'K01704'}                                                                                                               | M00432 | host bacteria |
| GCA_025268675.1_ASM2526867v1 | {'K00925', 'K13788'}                                                                                                                                   | M00579 | host bacteria |
| GCA_009914515.1_ASM991451v1  | {'K01803', 'K00845', 'K00134', 'K01834', 'K16370', 'K00927', 'K15916', 'K11645', 'K01689', 'K01810', 'K00873', 'K01624', 'K00886'}                     | M00001 | host bacteria |
| GCA_009914515.1_ASM991451v1  | {'K01803', 'K00873', 'K00134', 'K01834', 'K00927', 'K01689'}                                                                                           | M00002 | host bacteria |
| GCA_009914515.1_ASM991451v1  | {'K00948'}                                                                                                                                             | M00005 | host bacteria |
| GCA_009914515.1_ASM991451v1  | {'K00036', 'K01057', 'K00033'}                                                                                                                         | M00006 | host bacteria |
| GCA_009914515.1_ASM991451v1  | {'K01679', 'K01676', 'K00116', 'K01903', 'K00239', 'K00242', 'K00382', 'K01678', 'K01902', 'K00240', 'K00241', 'K00024', 'K18118', 'K00164', 'K00658'} | M00011 | host bacteria |
| GCA_009914515.1_ASM991451v1  | {'K00286', 'K00931', 'K00147'}                                                                                                                         | M00015 | host bacteria |
| GCA_009914515.1_ASM991451v1  | {'K00003', 'K12524', 'K00928', 'K00872', 'K01733', 'K00133'}                                                                                           | M00018 | host bacteria |
| GCA_009914515.1_ASM991451v1  | {'K00831', 'K00058', 'K01079'}                                                                                                                         | M00020 | host bacteria |
| GCA_009914515.1_ASM991451v1  | {'K01626', 'K00800', 'K03786', 'K01736', 'K00014', 'K00891', 'K13829', 'K01735'}                                                                       | M00022 | host bacteria |
| GCA_009914515.1_ASM991451v1  | {'K01657', 'K01609', 'K06001', 'K01696', 'K00766', 'K01817', 'K01658', 'K01695'}                                                                       | M00023 | host bacteria |
| GCA_009914515.1_ASM991451v1  | {'K01588', 'K00602', 'K00764', 'K01923', 'K08289', 'K01589', 'K01952', 'K11788', 'K01756', 'K01933', 'K01945', 'K11175'}                               | M00048 | host bacteria |
| GCA_009914515.1_ASM991451v1  | {'K01939', 'K00873', 'K00940', 'K01756', 'K00939'}                                                                                                     | M00049 | host bacteria |
| GCA_009914515.1_ASM991451v1  | {'K00873', 'K00940', 'K00942', 'K01951', 'K00088'}                                                                                                     | M00050 | host bacteria |
| GCA_009914515.1_ASM991451v1  | {'K01465', 'K01955', 'K00226', 'K01956', 'K00254', 'K01591', 'K00762', 'K00609'}                                                                       | M00051 | host bacteria |
| GCA_009914515.1_ASM991451v1  | {'K11263', 'K00645', 'K18472', 'K11533', 'K00648', 'K02160'}                                                                                           | M00082 | host bacteria |
| GCA_009914515.1_ASM991451v1  | {'K11533', 'K09458', 'K00059', 'K00208', 'K02371'}                                                                                                     | M00083 | host bacteria |
| GCA_009914515.1_ASM991451v1  | {'K01897'}                                                                                                                                             | M00086 | host bacteria |
| GCA_009914515.1_ASM991451v1  | {'K01918'}                                                                                                                                             | M00119 | host bacteria |
| GCA_009914515.1_ASM991451v1  | {'K13038', 'K00954', 'K03525', 'K00859', 'K00867'}                                                                                                     | M00120 | host bacteria |
| GCA_009914515.1_ASM991451v1  | {'K00330', 'K00333', 'K00342', 'K00340', 'K00335', 'K00341', 'K00336', 'K00338', 'K00331', 'K00332', 'K00339', 'K00334', 'K00343', 'K00337'}           | M00144 | host bacteria |
| GCA_009914515.1_ASM991451v1  | {'K05576'}                                                                                                                                             | M00145 | host bacteria |
| GCA_009914515.1_ASM991451v1  | {'K00241', 'K00242', 'K00240', 'K00239'}                                                                                                               | M00149 | host bacteria |
| GCA_009914515.1_ASM991451v1  | {'K00425', 'K00426'}                                                                                                                                   | M00153 | host bacteria |
| GCA_009914515.1_ASM991451v1  | {'K02113', 'K02109', 'K02114', 'K02111', 'K02112', 'K02110', 'K02108', 'K02115'}                                                                       | M00157 | host bacteria |
| GCA_009914515.1_ASM991451v1  | {'K00161', 'K00627', 'K00162', 'K00382', 'K00163'}                                                                                                     | M00307 | host bacteria |
| GCA_009914515.1_ASM991451v1  | {'K00052', 'K01649', 'K01703', 'K01704'}                                                                                                               | M00432 | host bacteria |
| GCA_009914515.1_ASM991451v1  | {'K00925', 'K13788'}                                                                                                                                   | M00579 | host bacteria |
| GCA_009914495.1_ASM991449v1  | {'K01803', 'K00845', 'K00134', 'K01834', 'K16370', 'K00927', 'K15916', 'K11645', 'K01689', 'K01810', 'K00873', 'K01624', 'K00886'}                     | M00001 | host bacteria |
| GCA_009914495.1_ASM991449v1  | {'K01803', 'K00873', 'K00134', 'K01834', 'K00927', 'K01689'}                                                                                           | M00002 | host bacteria |
| GCA_009914495.1_ASM991449v1  | {'K00948'}                                                                                                                                             | M00005 | host bacteria |
| GCA_009914495.1_ASM991449v1  | {'K00036', 'K01057', 'K00033'}                                                                                                                         | M00006 | host bacteria |
| GCA_009914495.1_ASM991449v1  | {'K01679', 'K01676', 'K00116', 'K01903', 'K00239', 'K00242', 'K00382', 'K01678', 'K01902', 'K00240', 'K00241', 'K00024', 'K18118', 'K00164', 'K00658'} | M00011 | host bacteria |
| GCA_009914495.1_ASM991449v1  | {'K00286', 'K00931', 'K00147'}                                                                                                                         | M00015 | host bacteria |
| GCA_009914495.1_ASM991449v1  | {'K00003', 'K12524', 'K00928', 'K00872', 'K01733', 'K00133'}                                                                                           | M00018 | host bacteria |
| GCA_009914495.1_ASM991449v1  | {'K00831', 'K00058', 'K01079'}                                                                                                                         | M00020 | host bacteria |
| GCA_009914495.1_ASM991449v1  | {'K01626', 'K00800', 'K03786', 'K01736', 'K00014', 'K00891', 'K13829', 'K01735'}                                                                       | M00022 | host bacteria |
| GCA_009914495.1_ASM991449v1  | {'K01657', 'K01609', 'K06001', 'K01696', 'K00766', 'K01817', 'K01658', 'K01695'}                                                                       | M00023 | host bacteria |
| GCA_009914495.1_ASM991449v1  | {'K01588', 'K00602', 'K00764', 'K01923', 'K08289', 'K01589', 'K01952', 'K11788', 'K01756', 'K01933', 'K01945', 'K11175'}                               | M00048 | host bacteria |
| GCA_009914495.1_ASM991449v1  | {'K01939', 'K00873', 'K00940', 'K01756', 'K00939'}                                                                                                     | M00049 | host bacteria |
| GCA_009914495.1_ASM991449v1  | {'K00873', 'K00940', 'K00942', 'K01951', 'K00088'}                                                                                                     | M00050 | host bacteria |
| GCA_009914495.1_ASM991449v1  | {'K01465', 'K01955', 'K00226', 'K01956', 'K00254', 'K01591', 'K00762', 'K00609'}                                                                       | M00051 | host bacteria |
| GCA_009914495.1_ASM991449v1  | {'K11263', 'K00645', 'K18472', 'K11533', 'K00648', 'K02160'}                                                                                           | M00082 | host bacteria |

|                             |                                                                                                                                                        |        |               |
|-----------------------------|--------------------------------------------------------------------------------------------------------------------------------------------------------|--------|---------------|
| GCA_009914495.1_ASM991449v1 | {'K11533', 'K09458', 'K00059', 'K00208', 'K02371'}                                                                                                     | M00083 | host bacteria |
| GCA_009914495.1_ASM991449v1 | {'K01897'}                                                                                                                                             | M00086 | host bacteria |
| GCA_009914495.1_ASM991449v1 | {'K01918'}                                                                                                                                             | M00119 | host bacteria |
| GCA_009914495.1_ASM991449v1 | {'K13038', 'K00954', 'K03525', 'K00859', 'K00867'}                                                                                                     | M00120 | host bacteria |
| GCA_009914495.1_ASM991449v1 | {'K00330', 'K00333', 'K00342', 'K00340', 'K00335', 'K00341', 'K00336', 'K00338', 'K00331', 'K00332', 'K00339', 'K00334', 'K00343', 'K00337'}           | M00144 | host bacteria |
| GCA_009914495.1_ASM991449v1 | {'K05576'}                                                                                                                                             | M00145 | host bacteria |
| GCA_009914495.1_ASM991449v1 | {'K00241', 'K00242', 'K00240', 'K00239'}                                                                                                               | M00149 | host bacteria |
| GCA_009914495.1_ASM991449v1 | {'K00425', 'K00426'}                                                                                                                                   | M00153 | host bacteria |
| GCA_009914495.1_ASM991449v1 | {'K02113', 'K02109', 'K02114', 'K02111', 'K02112', 'K02110', 'K02108', 'K02115'}                                                                       | M00157 | host bacteria |
| GCA_009914495.1_ASM991449v1 | {'K00161', 'K00627', 'K00162', 'K00382', 'K00163'}                                                                                                     | M00307 | host bacteria |
| GCA_009914495.1_ASM991449v1 | {'K00052', 'K01649', 'K01703', 'K01704'}                                                                                                               | M00432 | host bacteria |
| GCA_009914495.1_ASM991449v1 | {'K00925', 'K13788'}                                                                                                                                   | M00579 | host bacteria |
| CP045810.1                  | {'K01803', 'K00845', 'K00134', 'K01834', 'K16370', 'K00927', 'K15916', 'K11645', 'K01689', 'K01810', 'K00873', 'K01624', 'K00886'}                     | M00001 | host bacteria |
| CP045810.1                  | {'K01803', 'K00873', 'K00134', 'K01834', 'K00927', 'K01689'}                                                                                           | M00002 | host bacteria |
| CP045810.1                  | {'K00948'}                                                                                                                                             | M00005 | host bacteria |
| CP045810.1                  | {'K00036', 'K01057', 'K00033'}                                                                                                                         | M00006 | host bacteria |
| CP045810.1                  | {'K01679', 'K01676', 'K00116', 'K01903', 'K00239', 'K00242', 'K00382', 'K01678', 'K01902', 'K00240', 'K00241', 'K00024', 'K18118', 'K00164', 'K00658'} | M00011 | host bacteria |
| CP045810.1                  | {'K00286', 'K00931', 'K00147'}                                                                                                                         | M00015 | host bacteria |
| CP045810.1                  | {'K00003', 'K12524', 'K00928', 'K00872', 'K01733', 'K00133'}                                                                                           | M00018 | host bacteria |
| CP045810.1                  | {'K00831', 'K00058', 'K01079'}                                                                                                                         | M00020 | host bacteria |
| CP045810.1                  | {'K01626', 'K00800', 'K03786', 'K01736', 'K00014', 'K00891', 'K13829', 'K01735'}                                                                       | M00022 | host bacteria |
| CP045810.1                  | {'K01657', 'K01609', 'K06001', 'K01696', 'K00766', 'K01817', 'K01658', 'K01695'}                                                                       | M00023 | host bacteria |
| CP045810.1                  | {'K01588', 'K00602', 'K00764', 'K01923', 'K08289', 'K01589', 'K01952', 'K11788', 'K01756', 'K01933', 'K01945', 'K11175'}                               | M00048 | host bacteria |
| CP045810.1                  | {'K01939', 'K00873', 'K00940', 'K01756', 'K00939'}                                                                                                     | M00049 | host bacteria |
| CP045810.1                  | {'K00873', 'K00940', 'K00942', 'K01951', 'K00088'}                                                                                                     | M00050 | host bacteria |
| CP045810.1                  | {'K01465', 'K01955', 'K00226', 'K01956', 'K00254', 'K01591', 'K00762', 'K00609'}                                                                       | M00051 | host bacteria |
| CP045810.1                  | {'K11263', 'K00645', 'K18472', 'K11533', 'K00648', 'K02160'}                                                                                           | M00082 | host bacteria |
| CP045810.1                  | {'K11533', 'K09458', 'K00059', 'K00208', 'K02371'}                                                                                                     | M00083 | host bacteria |
| CP045810.1                  | {'K01897'}                                                                                                                                             | M00086 | host bacteria |
| CP045810.1                  | {'K01918'}                                                                                                                                             | M00119 | host bacteria |
| CP045810.1                  | {'K13038', 'K00954', 'K03525', 'K00859', 'K00867'}                                                                                                     | M00120 | host bacteria |
| CP045810.1                  | {'K00330', 'K00333', 'K00342', 'K00340', 'K00335', 'K00341', 'K00336', 'K00338', 'K00331', 'K00332', 'K00339', 'K00334', 'K00343', 'K00337'}           | M00144 | host bacteria |
| CP045810.1                  | {'K05576'}                                                                                                                                             | M00145 | host bacteria |
| CP045810.1                  | {'K00241', 'K00242', 'K00240', 'K00239'}                                                                                                               | M00149 | host bacteria |
| CP045810.1                  | {'K00425', 'K00426'}                                                                                                                                   | M00153 | host bacteria |
| CP045810.1                  | {'K02113', 'K02109', 'K02114', 'K02111', 'K02112', 'K02110', 'K02108', 'K02115'}                                                                       | M00157 | host bacteria |
| CP045810.1                  | {'K00161', 'K00627', 'K00162', 'K00382', 'K00163'}                                                                                                     | M00307 | host bacteria |
| CP045810.1                  | {'K00052', 'K01649', 'K01703', 'K01704'}                                                                                                               | M00432 | host bacteria |
| CP045810.1                  | {'K00925', 'K13788'}                                                                                                                                   | M00579 | host bacteria |
| GCA_009914535.1_ASM991453v1 | {'K01803', 'K00845', 'K00134', 'K01834', 'K16370', 'K00927', 'K15916', 'K11645', 'K01689', 'K01810', 'K00873', 'K01624', 'K00886'}                     | M00001 | host bacteria |
| GCA_009914535.1_ASM991453v1 | {'K01803', 'K00873', 'K00134', 'K01834', 'K00927', 'K01689'}                                                                                           | M00002 | host bacteria |
| GCA_009914535.1_ASM991453v1 | {'K00948'}                                                                                                                                             | M00005 | host bacteria |
| GCA_009914535.1_ASM991453v1 | {'K00036', 'K01057', 'K00033'}                                                                                                                         | M00006 | host bacteria |
| GCA_009914535.1_ASM991453v1 | {'K01679', 'K01676', 'K00116', 'K01903', 'K00239', 'K00242', 'K00382', 'K01678', 'K01902', 'K00240', 'K00241', 'K00024', 'K18118', 'K00164', 'K00658'} | M00011 | host bacteria |
| GCA_009914535.1_ASM991453v1 | {'K00286', 'K00931', 'K00147'}                                                                                                                         | M00015 | host bacteria |
| GCA_009914535.1_ASM991453v1 | {'K00003', 'K12524', 'K00928', 'K00872', 'K01733', 'K00133'}                                                                                           | M00018 | host bacteria |
| GCA_009914535.1_ASM991453v1 | {'K00831', 'K00058', 'K01079'}                                                                                                                         | M00020 | host bacteria |
| GCA_009914535.1_ASM991453v1 | {'K01626', 'K00800', 'K03786', 'K01736', 'K00014', 'K00891', 'K13829', 'K01735'}                                                                       | M00022 | host bacteria |
| GCA_009914535.1_ASM991453v1 | {'K01657', 'K01609', 'K06001', 'K01696', 'K00766', 'K01817', 'K01658', 'K01695'}                                                                       | M00023 | host bacteria |
| GCA_009914535.1_ASM991453v1 | {'K01588', 'K00602', 'K00764', 'K01923', 'K01589', 'K01952', 'K11788', 'K01756', 'K01933', 'K01945', 'K11175'}                                         | M00048 | host bacteria |
| GCA_009914535.1_ASM991453v1 | {'K01939', 'K00873', 'K00940', 'K01756', 'K00939'}                                                                                                     | M00049 | host bacteria |
| GCA_009914535.1_ASM991453v1 | {'K00873', 'K00940', 'K00942', 'K01951', 'K00088'}                                                                                                     | M00050 | host bacteria |
| GCA_009914535.1_ASM991453v1 | {'K01465', 'K01955', 'K00226', 'K01956', 'K00254', 'K01591', 'K00762', 'K00609'}                                                                       | M00051 | host bacteria |
| GCA_009914535.1_ASM991453v1 | {'K11263', 'K00645', 'K18472', 'K11533', 'K00648', 'K02160'}                                                                                           | M00082 | host bacteria |
| GCA_009914535.1_ASM991453v1 | {'K11533', 'K09458', 'K00059', 'K00208', 'K02371'}                                                                                                     | M00083 | host bacteria |
| GCA_009914535.1_ASM991453v1 | {'K01897'}                                                                                                                                             | M00086 | host bacteria |
| GCA_009914535.1_ASM991453v1 | {'K01918'}                                                                                                                                             | M00119 | host bacteria |
| GCA_009914535.1_ASM991453v1 | {'K13038', 'K00954', 'K03525', 'K00859', 'K00867'}                                                                                                     | M00120 | host bacteria |
| GCA_009914535.1_ASM991453v1 | {'K00330', 'K00333', 'K00342', 'K00340', 'K00335', 'K00341', 'K00336', 'K00338', 'K00331', 'K00332', 'K00339', 'K00334', 'K00343', 'K00337'}           | M00144 | host bacteria |
| GCA_009914535.1_ASM991453v1 | {'K05576'}                                                                                                                                             | M00145 | host bacteria |
| GCA_009914535.1_ASM991453v1 | {'K00241', 'K00242', 'K00240', 'K00239'}                                                                                                               | M00149 | host bacteria |
| GCA_009914535.1_ASM991453v1 | {'K00425', 'K00426'}                                                                                                                                   | M00153 | host bacteria |



|                              |                                                                                                                                                        |        |               |
|------------------------------|--------------------------------------------------------------------------------------------------------------------------------------------------------|--------|---------------|
| GCA_009914535.1_ASM991453v1  | {'K02113', 'K02109', 'K02114', 'K02111', 'K02112', 'K02110', 'K02108', 'K02115'}                                                                       | M00157 | host bacteria |
| GCA_009914535.1_ASM991453v1  | {'K00161', 'K00382', 'K00627', 'K00163'}                                                                                                               | M00307 | host bacteria |
| GCA_009914535.1_ASM991453v1  | {'K00052', 'K01649', 'K01703', 'K01704'}                                                                                                               | M00432 | host bacteria |
| GCA_009914535.1_ASM991453v1  | {'K00925', 'K13788'}                                                                                                                                   | M00579 | host bacteria |
| GCA_025273675.1_ASM2527367v1 | {'K01803', 'K00845', 'K00134', 'K01834', 'K16370', 'K00927', 'K15916', 'K11645', 'K01689', 'K01810', 'K00873', 'K01624', 'K00886'}                     | M00001 | host bacteria |
| GCA_025273675.1_ASM2527367v1 | {'K01803', 'K00873', 'K00134', 'K01834', 'K00927', 'K01689'}                                                                                           | M00002 | host bacteria |
| GCA_025273675.1_ASM2527367v1 | {'K00948'}                                                                                                                                             | M00005 | host bacteria |
| GCA_025273675.1_ASM2527367v1 | {'K00036', 'K01057', 'K00033'}                                                                                                                         | M00006 | host bacteria |
| GCA_025273675.1_ASM2527367v1 | {'K01679', 'K01676', 'K00116', 'K01903', 'K00239', 'K00242', 'K00382', 'K01678', 'K01902', 'K00240', 'K00241', 'K00024', 'K18118', 'K00164', 'K00658'} | M00011 | host bacteria |
| GCA_025273675.1_ASM2527367v1 | {'K00286', 'K00931', 'K00147'}                                                                                                                         | M00015 | host bacteria |
| GCA_025273675.1_ASM2527367v1 | {'K00003', 'K12524', 'K00928', 'K00872', 'K01733', 'K00133'}                                                                                           | M00018 | host bacteria |
| GCA_025273675.1_ASM2527367v1 | {'K00831', 'K00058', 'K01079'}                                                                                                                         | M00020 | host bacteria |
| GCA_025273675.1_ASM2527367v1 | {'K01626', 'K00800', 'K03786', 'K01736', 'K00014', 'K00891', 'K13829', 'K01735'}                                                                       | M00022 | host bacteria |
| GCA_025273675.1_ASM2527367v1 | {'K01657', 'K01609', 'K06001', 'K01696', 'K00766', 'K01817', 'K01658', 'K01695'}                                                                       | M00023 | host bacteria |
| GCA_025273675.1_ASM2527367v1 | {'K01588', 'K00602', 'K00764', 'K01923', 'K01589', 'K01952', 'K11788', 'K01756', 'K01933', 'K01945', 'K11175'}                                         | M00048 | host bacteria |
| GCA_025273675.1_ASM2527367v1 | {'K01939', 'K00873', 'K00940', 'K01756', 'K00939'}                                                                                                     | M00049 | host bacteria |
| GCA_025273675.1_ASM2527367v1 | {'K00873', 'K00940', 'K00942', 'K01951', 'K00088'}                                                                                                     | M00050 | host bacteria |
| GCA_025273675.1_ASM2527367v1 | {'K01465', 'K01955', 'K00226', 'K01956', 'K00254', 'K01591', 'K00762', 'K00609'}                                                                       | M00051 | host bacteria |
| GCA_025273675.1_ASM2527367v1 | {'K11263', 'K00645', 'K18472', 'K11533', 'K00648', 'K02160'}                                                                                           | M00082 | host bacteria |
| GCA_025273675.1_ASM2527367v1 | {'K11533', 'K09458', 'K00059', 'K00208', 'K02371'}                                                                                                     | M00083 | host bacteria |
| GCA_025273675.1_ASM2527367v1 | {'K01897'}                                                                                                                                             | M00086 | host bacteria |
| GCA_025273675.1_ASM2527367v1 | {'K01918'}                                                                                                                                             | M00119 | host bacteria |
| GCA_025273675.1_ASM2527367v1 | {'K13038', 'K00954', 'K03525', 'K00859', 'K00867'}                                                                                                     | M00120 | host bacteria |
| GCA_025273675.1_ASM2527367v1 | {'K00330', 'K00333', 'K00342', 'K00340', 'K00335', 'K00341', 'K00336', 'K00338', 'K00331', 'K00332', 'K00339', 'K00334', 'K00343', 'K00337'}           | M00144 | host bacteria |
| GCA_025273675.1_ASM2527367v1 | {'K05576'}                                                                                                                                             | M00145 | host bacteria |
| GCA_025273675.1_ASM2527367v1 | {'K00241', 'K00242', 'K00240', 'K00239'}                                                                                                               | M00149 | host bacteria |
| GCA_025273675.1_ASM2527367v1 | {'K00425', 'K00426'}                                                                                                                                   | M00153 | host bacteria |
| GCA_025273675.1_ASM2527367v1 | {'K02113', 'K02109', 'K02114', 'K02111', 'K02112', 'K02110', 'K02108', 'K02115'}                                                                       | M00157 | host bacteria |
| GCA_025273675.1_ASM2527367v1 | {'K00161', 'K00382', 'K00627', 'K00163'}                                                                                                               | M00307 | host bacteria |
| GCA_025273675.1_ASM2527367v1 | {'K00052', 'K01649', 'K01703', 'K01704'}                                                                                                               | M00432 | host bacteria |
| GCA_025273675.1_ASM2527367v1 | {'K00925', 'K13788'}                                                                                                                                   | M00579 | host bacteria |
| GCA_024399335.1_ASM2439933v1 | {'K01803', 'K00845', 'K00134', 'K01834', 'K00927', 'K11645', 'K01689', 'K01810', 'K00873', 'K01624'}                                                   | M00001 | host bacteria |
| GCA_024399335.1_ASM2439933v1 | {'K01803', 'K00873', 'K00134', 'K01834', 'K00927', 'K01689'}                                                                                           | M00002 | host bacteria |
| GCA_024399335.1_ASM2439933v1 | {'K00948'}                                                                                                                                             | M00005 | host bacteria |
| GCA_024399335.1_ASM2439933v1 | {'K01679', 'K00116', 'K01903', 'K00239', 'K00242', 'K00382', 'K01902', 'K00240', 'K00241', 'K00024', 'K00164', 'K00658'}                               | M00011 | host bacteria |
| GCA_024399335.1_ASM2439933v1 | {'K00286', 'K00931', 'K00147'}                                                                                                                         | M00015 | host bacteria |
| GCA_024399335.1_ASM2439933v1 | {'K00003', 'K12524', 'K00928', 'K00872', 'K01733', 'K00133'}                                                                                           | M00018 | host bacteria |
| GCA_024399335.1_ASM2439933v1 | {'K00831', 'K00058', 'K01079'}                                                                                                                         | M00020 | host bacteria |
| GCA_024399335.1_ASM2439933v1 | {'K01626', 'K00800', 'K03786', 'K01736', 'K00014', 'K00891', 'K13829', 'K01735'}                                                                       | M00022 | host bacteria |
| GCA_024399335.1_ASM2439933v1 | {'K01657', 'K01609', 'K06001', 'K01696', 'K00766', 'K01817', 'K01658', 'K01695'}                                                                       | M00023 | host bacteria |
| GCA_024399335.1_ASM2439933v1 | {'K01588', 'K00602', 'K00764', 'K01923', 'K01589', 'K01952', 'K11788', 'K01756', 'K01933', 'K01945', 'K11175'}                                         | M00048 | host bacteria |
| GCA_024399335.1_ASM2439933v1 | {'K01939', 'K00873', 'K00940', 'K01756', 'K00939'}                                                                                                     | M00049 | host bacteria |
| GCA_024399335.1_ASM2439933v1 | {'K00873', 'K00940', 'K00942', 'K01951', 'K00088'}                                                                                                     | M00050 | host bacteria |
| GCA_024399335.1_ASM2439933v1 | {'K01465', 'K01955', 'K00226', 'K01956', 'K00254', 'K01591', 'K00762', 'K00609'}                                                                       | M00051 | host bacteria |
| GCA_024399335.1_ASM2439933v1 | {'K11263', 'K00645', 'K00648'}                                                                                                                         | M00082 | host bacteria |
| GCA_024399335.1_ASM2439933v1 | {'K00059', 'K09458'}                                                                                                                                   | M00083 | host bacteria |
| GCA_024399335.1_ASM2439933v1 | {'K01897'}                                                                                                                                             | M00086 | host bacteria |
| GCA_024399335.1_ASM2439933v1 | {'K00954', 'K00859', 'K13038', 'K00867'}                                                                                                               | M00120 | host bacteria |
| GCA_024399335.1_ASM2439933v1 | {'K00241', 'K00242', 'K00240', 'K00239'}                                                                                                               | M00149 | host bacteria |
| GCA_024399335.1_ASM2439933v1 | {'K00425', 'K00426'}                                                                                                                                   | M00153 | host bacteria |
| GCA_024399335.1_ASM2439933v1 | {'K02113', 'K02109', 'K02114', 'K02111', 'K02112', 'K02110', 'K02108', 'K02115'}                                                                       | M00157 | host bacteria |
| GCA_024399335.1_ASM2439933v1 | {'K00161', 'K00627', 'K00162', 'K00382', 'K00163'}                                                                                                     | M00307 | host bacteria |
| GCA_024399335.1_ASM2439933v1 | {'K00052', 'K01649', 'K01703', 'K01704'}                                                                                                               | M00432 | host bacteria |
| GCA_024399335.1_ASM2439933v1 | {'K00925', 'K13788'}                                                                                                                                   | M00579 | host bacteria |
| GCA_005696855.1_ASM569685v1  | {'K01803', 'K00845', 'K00134', 'K01834', 'K16370', 'K00927', 'K15916', 'K00850', 'K01623', 'K01689', 'K00873', 'K01624', 'K00886'}                     | M00001 | host bacteria |
| GCA_005696855.1_ASM569685v1  | {'K01803', 'K00873', 'K00134', 'K01834', 'K00927', 'K01689'}                                                                                           | M00002 | host bacteria |
| GCA_005696855.1_ASM569685v1  | {'K00948'}                                                                                                                                             | M00005 | host bacteria |
| GCA_005696855.1_ASM569685v1  | {'K00036', 'K01057', 'K00033'}                                                                                                                         | M00006 | host bacteria |
| GCA_005696855.1_ASM569685v1  | {'K01679', 'K00239', 'K00175', 'K00382', 'K00240', 'K00241', 'K00174', 'K00024', 'K18118', 'K00164', 'K00658'}                                         | M00011 | host bacteria |
| GCA_005696855.1_ASM569685v1  | {'K00286', 'K00931', 'K00147'}                                                                                                                         | M00015 | host bacteria |
| GCA_005696855.1_ASM569685v1  | {'K00003', 'K12524', 'K00928', 'K00872', 'K01733', 'K00133'}                                                                                           | M00018 | host bacteria |
| GCA_005696855.1_ASM569685v1  | {'K00831', 'K00058', 'K01079'}                                                                                                                         | M00020 | host bacteria |

|                              |                                                                                                                                              |        |                  |
|------------------------------|----------------------------------------------------------------------------------------------------------------------------------------------|--------|------------------|
| GCA_005696855.1_ASM569685v1  | {'K01626', 'K00014', 'K00800', 'K01736', 'K03785', 'K00891', 'K13829', 'K01735'}                                                             | M00022 | host bacteria    |
| GCA_005696855.1_ASM569685v1  | {'K01657', 'K01609', 'K06001', 'K01696', 'K00766', 'K01817', 'K01658', 'K01695'}                                                             | M00023 | host bacteria    |
| GCA_005696855.1_ASM569685v1  | {'K01588', 'K00602', 'K00764', 'K01923', 'K01589', 'K01952', 'K11788', 'K01756', 'K01933', 'K01945', 'K11175'}                               | M00048 | host bacteria    |
| GCA_005696855.1_ASM569685v1  | {'K01939', 'K00873', 'K00939', 'K01756'}                                                                                                     | M00049 | host bacteria    |
| GCA_005696855.1_ASM569685v1  | {'K01951', 'K00088', 'K00873', 'K00942'}                                                                                                     | M00050 | host bacteria    |
| GCA_005696855.1_ASM569685v1  | {'K01465', 'K01955', 'K00226', 'K01956', 'K00254', 'K01591', 'K00762', 'K00609'}                                                             | M00051 | host bacteria    |
| GCA_005696855.1_ASM569685v1  | {'K11263', 'K00645', 'K00648'}                                                                                                               | M00082 | host bacteria    |
| GCA_005696855.1_ASM569685v1  | {'K00059', 'K09458', 'K00208'}                                                                                                               | M00083 | host bacteria    |
| GCA_005696855.1_ASM569685v1  | {'K01897'}                                                                                                                                   | M00086 | host bacteria    |
| GCA_005696855.1_ASM569685v1  | {'K00954', 'K00859', 'K13038', 'K00867'}                                                                                                     | M00120 | host bacteria    |
| GCA_005696855.1_ASM569685v1  | {'K00330', 'K00333', 'K00342', 'K00340', 'K00335', 'K00341', 'K00336', 'K00338', 'K00331', 'K00332', 'K00339', 'K00334', 'K00343', 'K00337'} | M00144 | host bacteria    |
| GCA_005696855.1_ASM569685v1  | {'K05576'}                                                                                                                                   | M00145 | host bacteria    |
| GCA_005696855.1_ASM569685v1  | {'K00241', 'K00240', 'K00239'}                                                                                                               | M00149 | host bacteria    |
| GCA_005696855.1_ASM569685v1  | {'K00425', 'K00426'}                                                                                                                         | M00153 | host bacteria    |
| GCA_005696855.1_ASM569685v1  | {'K02113', 'K02109', 'K02114', 'K02111', 'K02112', 'K02110', 'K02108', 'K02115'}                                                             | M00157 | host bacteria    |
| GCA_005696855.1_ASM569685v1  | {'K03737', 'K00161', 'K00169', 'K00627', 'K00162', 'K00382', 'K00163'}                                                                       | M00307 | host bacteria    |
| GCA_005696855.1_ASM569685v1  | {'K00052', 'K01649', 'K01703', 'K01704'}                                                                                                     | M00432 | host bacteria    |
| GCA_005696855.1_ASM569685v1  | {'K00925', 'K13788'}                                                                                                                         | M00579 | host bacteria    |
| GCA_010202265.1_ASM1020226v1 | {'K15916', 'K01624', 'K01834', 'K00927', 'K01689', 'K01803', 'K00134', 'K00873'}                                                             | M00001 | Saccharibacteria |
| GCA_010202265.1_ASM1020226v1 | {'K01834', 'K00927', 'K01689', 'K01803', 'K00134', 'K00873'}                                                                                 | M00002 | Saccharibacteria |
| GCA_010202265.1_ASM1020226v1 | {'K00873', 'K00939', 'K01939', 'K00940'}                                                                                                     | M00049 | Saccharibacteria |
| GCA_010202265.1_ASM1020226v1 | {'K02108', 'K02115', 'K02110', 'K02113', 'K02109', 'K02112', 'K02111', 'K02114'}                                                             | M00157 | Saccharibacteria |
| GCA_010202265.1_ASM1020226v1 | {'K00627'}                                                                                                                                   | M00307 | Saccharibacteria |
| GCA_005697055.1_ASM569705v1  | {'K01834', 'K01689', 'K01803', 'K00134', 'K15916', 'K01624', 'K00927', 'K00845', 'K00873'}                                                   | M00001 | Saccharibacteria |
| GCA_005697055.1_ASM569705v1  | {'K01834', 'K00927', 'K01689', 'K01803', 'K00134', 'K00873'}                                                                                 | M00002 | Saccharibacteria |
| GCA_005697055.1_ASM569705v1  | {'K00873', 'K00939', 'K01939', 'K00940'}                                                                                                     | M00049 | Saccharibacteria |
| GCA_005697055.1_ASM569705v1  | {'K02108', 'K02115', 'K02110', 'K02113', 'K02109', 'K02112', 'K02111', 'K02114'}                                                             | M00157 | Saccharibacteria |
| GCA_005697055.1_ASM569705v1  | {'K00627', 'K00382'}                                                                                                                         | M00307 | Saccharibacteria |
| GCA_013394755.1_ASM1339475v1 | {'K01834', 'K01689', 'K01803', 'K00134', 'K15916', 'K01624', 'K00927', 'K00845', 'K00873'}                                                   | M00001 | Saccharibacteria |
| GCA_013394755.1_ASM1339475v1 | {'K01834', 'K00927', 'K01689', 'K01803', 'K00134', 'K00873'}                                                                                 | M00002 | Saccharibacteria |
| GCA_013394755.1_ASM1339475v1 | {'K02108', 'K02115', 'K02110', 'K02113', 'K02109', 'K02112', 'K02111', 'K02114'}                                                             | M00157 | Saccharibacteria |
| GCA_010202465.1_ASM1020246v1 | {'K01834', 'K01689', 'K01803', 'K00134', 'K15916', 'K01624', 'K00927', 'K00845', 'K00873'}                                                   | M00001 | Saccharibacteria |
| GCA_010202465.1_ASM1020246v1 | {'K01834', 'K00927', 'K01689', 'K01803', 'K00134', 'K00873'}                                                                                 | M00002 | Saccharibacteria |
| GCA_010202465.1_ASM1020246v1 | {'K02108', 'K02109', 'K02112', 'K02111', 'K02115', 'K02110', 'K02114'}                                                                       | M00157 | Saccharibacteria |
| GCA_013100845.1_ASM1310084v1 | {'K01834', 'K01689', 'K01803', 'K00134', 'K15916', 'K01624', 'K00927', 'K00845', 'K00873'}                                                   | M00001 | Saccharibacteria |
| GCA_013100845.1_ASM1310084v1 | {'K01834', 'K00927', 'K01689', 'K01803', 'K00134', 'K00873'}                                                                                 | M00002 | Saccharibacteria |
| GCA_013100845.1_ASM1310084v1 | {'K02108', 'K02115', 'K02110', 'K02113', 'K02109', 'K02112', 'K02111', 'K02114'}                                                             | M00157 | Saccharibacteria |
| GCA_010202845.1_ASM1020284v1 | {'K01834', 'K01689', 'K01803', 'K00134', 'K15916', 'K01624', 'K00927', 'K00845', 'K00873'}                                                   | M00001 | Saccharibacteria |
| GCA_010202845.1_ASM1020284v1 | {'K01834', 'K00927', 'K01689', 'K01803', 'K00134', 'K00873'}                                                                                 | M00002 | Saccharibacteria |
| GCA_010202845.1_ASM1020284v1 | {'K02108', 'K02109', 'K02112', 'K02111', 'K02115', 'K02110', 'K02114'}                                                                       | M00157 | Saccharibacteria |
| GCA_005697565.1_ASM569756v1  | {'K15916', 'K01624', 'K01834', 'K00927', 'K01689', 'K01803', 'K00134', 'K00873'}                                                             | M00001 | Saccharibacteria |
| GCA_005697565.1_ASM569756v1  | {'K01834', 'K00927', 'K01689', 'K01803', 'K00134', 'K00873'}                                                                                 | M00002 | Saccharibacteria |
| GCA_005697565.1_ASM569756v1  | {'K01951', 'K00873', 'K00942', 'K00940'}                                                                                                     | M00050 | Saccharibacteria |
| GCA_005697565.1_ASM569756v1  | {'K02108', 'K02115', 'K02110', 'K02113', 'K02109', 'K02112', 'K02111', 'K02114'}                                                             | M00157 | Saccharibacteria |
| GCA_005697565.1_ASM569756v1  | {'K00382'}                                                                                                                                   | M00307 | Saccharibacteria |
| GCA_010202645.1_ASM1020264v1 | {'K01834', 'K01689', 'K01803', 'K00134', 'K15916', 'K01624', 'K00927', 'K00845', 'K00873'}                                                   | M00001 | Saccharibacteria |
| GCA_010202645.1_ASM1020264v1 | {'K01834', 'K00927', 'K01689', 'K01803', 'K00134', 'K00873'}                                                                                 | M00002 | Saccharibacteria |
| GCA_010202645.1_ASM1020264v1 | {'K02108', 'K02109', 'K02112', 'K02111', 'K02115', 'K02110', 'K02114'}                                                                       | M00157 | Saccharibacteria |
| GCA_005697395.1_ASM569739v1  | {'K01834', 'K01689', 'K01803', 'K00134', 'K15916', 'K01624', 'K00927', 'K00845', 'K00873'}                                                   | M00001 | Saccharibacteria |
| GCA_005697395.1_ASM569739v1  | {'K01834', 'K00927', 'K01689', 'K01803', 'K00134', 'K00873'}                                                                                 | M00002 | Saccharibacteria |
| GCA_005697395.1_ASM569739v1  | {'K02108', 'K02115', 'K02110', 'K02113', 'K02109', 'K02112', 'K02111', 'K02114'}                                                             | M00157 | Saccharibacteria |
| GCA_013098855.1_ASM1309885v1 | {'K15916', 'K01624', 'K01834', 'K00927', 'K01689', 'K01803', 'K00134', 'K00873'}                                                             | M00001 | Saccharibacteria |
| GCA_013098855.1_ASM1309885v1 | {'K01834', 'K00927', 'K01689', 'K01803', 'K00134', 'K00873'}                                                                                 | M00002 | Saccharibacteria |
| GCA_013098855.1_ASM1309885v1 | {'K00873', 'K00939', 'K01939', 'K00940'}                                                                                                     | M00049 | Saccharibacteria |
| GCA_013098855.1_ASM1309885v1 | {'K02108', 'K02115', 'K02110', 'K02113', 'K02109', 'K02112', 'K02111', 'K02114'}                                                             | M00157 | Saccharibacteria |
| GCA_013098855.1_ASM1309885v1 | {'K00627'}                                                                                                                                   | M00307 | Saccharibacteria |
| GCA_013099015.1_ASM1309901v1 | {'K01834', 'K01689', 'K01803', 'K00134', 'K15916', 'K01624', 'K00927', 'K00845', 'K00873'}                                                   | M00001 | Saccharibacteria |
| GCA_013099015.1_ASM1309901v1 | {'K01834', 'K00927', 'K01689', 'K01803', 'K00134', 'K00873'}                                                                                 | M00002 | Saccharibacteria |
| GCA_013099015.1_ASM1309901v1 | {'K02108', 'K02109', 'K02112', 'K02111', 'K02115', 'K02110', 'K02114'}                                                                       | M00157 | Saccharibacteria |
| GCA_025349965.1_ASM2534996v1 | {'K01624', 'K00134', 'K00845', 'K00927', 'K01803', 'K15916', 'K00873'}                                                                       | M00001 | Saccharibacteria |
| GCA_025349965.1_ASM2534996v1 | {'K00927', 'K01803', 'K00134', 'K00873'}                                                                                                     | M00002 | Saccharibacteria |
| GCA_025349965.1_ASM2534996v1 | {'K02108', 'K02115', 'K02110', 'K02113', 'K02109', 'K02112', 'K02111', 'K02114'}                                                             | M00157 | Saccharibacteria |

|                              |                                                                                            |        |                  |
|------------------------------|--------------------------------------------------------------------------------------------|--------|------------------|
| GCA_025349965.1_ASM2534996v1 | {'K00627', 'K00382'}                                                                       | M00307 | Saccharibacteria |
| GCA_013099195.1_ASM1309919v1 | {'K01834', 'K01689', 'K01803', 'K00134', 'K15916', 'K01624', 'K00927', 'K00845', 'K00873'} | M00001 | Saccharibacteria |
| GCA_013099195.1_ASM1309919v1 | {'K01834', 'K00927', 'K01689', 'K01803', 'K00134', 'K00873'}                               | M00002 | Saccharibacteria |
| GCA_013099195.1_ASM1309919v1 | {'K02108', 'K02109', 'K02112', 'K02111', 'K02115', 'K02110', 'K02114'}                     | M00157 | Saccharibacteria |
| GCA_013098515.1_ASM1309851v1 | {'K01834', 'K01689', 'K01803', 'K00134', 'K15916', 'K01624', 'K00927', 'K00845', 'K00873'} | M00001 | Saccharibacteria |
| GCA_013098515.1_ASM1309851v1 | {'K01834', 'K00927', 'K01689', 'K01803', 'K00134', 'K00873'}                               | M00002 | Saccharibacteria |
| GCA_013098515.1_ASM1309851v1 | {'K02108', 'K02109', 'K02112', 'K02111', 'K02115', 'K02110', 'K02114'}                     | M00157 | Saccharibacteria |
| GCA_018127705.1_ASM1812770v1 | {'K15916', 'K01624', 'K01834', 'K01689', 'K01803', 'K00134', 'K00873'}                     | M00001 | Saccharibacteria |
| GCA_018127705.1_ASM1812770v1 | {'K01834', 'K01689', 'K01803', 'K00134', 'K00873'}                                         | M00002 | Saccharibacteria |
| GCA_018127705.1_ASM1812770v1 | {'K01951', 'K00873', 'K00942', 'K00940'}                                                   | M00050 | Saccharibacteria |
| GCA_018127705.1_ASM1812770v1 | {'K02108', 'K02115', 'K02110', 'K02113', 'K02109', 'K02112', 'K02111', 'K02114'}           | M00157 | Saccharibacteria |
| GCA_010201925.1_ASM1020192v1 | {'K01834', 'K01689', 'K01803', 'K00134', 'K15916', 'K01624', 'K00927', 'K00845', 'K00873'} | M00001 | Saccharibacteria |
| GCA_010201925.1_ASM1020192v1 | {'K01834', 'K00927', 'K01689', 'K01803', 'K00134', 'K00873'}                               | M00002 | Saccharibacteria |
| GCA_010201925.1_ASM1020192v1 | {'K00873', 'K00939', 'K01939', 'K00940'}                                                   | M00049 | Saccharibacteria |
| GCA_010201925.1_ASM1020192v1 | {'K02108', 'K02115', 'K02110', 'K02113', 'K02109', 'K02112', 'K02111', 'K02114'}           | M00157 | Saccharibacteria |
| GCA_010201925.1_ASM1020192v1 | {'K00627'}                                                                                 | M00307 | Saccharibacteria |
| GCA_010202115.1_ASM1020211v1 | {'K01834', 'K01689', 'K01803', 'K00134', 'K15916', 'K01624', 'K00927', 'K00845', 'K00873'} | M00001 | Saccharibacteria |
| GCA_010202115.1_ASM1020211v1 | {'K01834', 'K00927', 'K01689', 'K01803', 'K00134', 'K00873'}                               | M00002 | Saccharibacteria |
| GCA_010202115.1_ASM1020211v1 | {'K02108', 'K02109', 'K02112', 'K02111', 'K02115', 'K02110', 'K02114'}                     | M00157 | Saccharibacteria |
| GCA_013100805.1_ASM1310080v1 | {'K01834', 'K01689', 'K01803', 'K00134', 'K15916', 'K01624', 'K00927', 'K00845', 'K00873'} | M00001 | Saccharibacteria |
| GCA_013100805.1_ASM1310080v1 | {'K01834', 'K00927', 'K01689', 'K01803', 'K00134', 'K00873'}                               | M00002 | Saccharibacteria |
| GCA_013100805.1_ASM1310080v1 | {'K02108', 'K02109', 'K02112', 'K02111', 'K02115', 'K02110', 'K02114'}                     | M00157 | Saccharibacteria |
| GCA_005697215.1_ASM569721v1  | {'K01834', 'K01689', 'K01803', 'K00134', 'K15916', 'K01624', 'K00927', 'K00845', 'K00873'} | M00001 | Saccharibacteria |
| GCA_005697215.1_ASM569721v1  | {'K01834', 'K00927', 'K01689', 'K01803', 'K00134', 'K00873'}                               | M00002 | Saccharibacteria |
| GCA_005697215.1_ASM569721v1  | {'K02108', 'K02115', 'K02110', 'K02113', 'K02109', 'K02112', 'K02111', 'K02114'}           | M00157 | Saccharibacteria |
| GCA_013100825.1_ASM1310082v1 | {'K01834', 'K01689', 'K01803', 'K00134', 'K15916', 'K01624', 'K00927', 'K00845', 'K00873'} | M00001 | Saccharibacteria |
| GCA_013100825.1_ASM1310082v1 | {'K01834', 'K00927', 'K01689', 'K01803', 'K00134', 'K00873'}                               | M00002 | Saccharibacteria |
| GCA_013100825.1_ASM1310082v1 | {'K02108', 'K02109', 'K02112', 'K02111', 'K02115', 'K02110', 'K02114'}                     | M00157 | Saccharibacteria |
| GCA_013098655.1_ASM1309865v1 | {'K01834', 'K01689', 'K01803', 'K00134', 'K15916', 'K01624', 'K00927', 'K00845', 'K00873'} | M00001 | Saccharibacteria |
| GCA_013098655.1_ASM1309865v1 | {'K01834', 'K00927', 'K01689', 'K01803', 'K00134', 'K00873'}                               | M00002 | Saccharibacteria |
| GCA_013098655.1_ASM1309865v1 | {'K00873', 'K00939', 'K01939', 'K00940'}                                                   | M00049 | Saccharibacteria |
| GCA_013098655.1_ASM1309865v1 | {'K02108', 'K02115', 'K02110', 'K02113', 'K02109', 'K02112', 'K02111', 'K02114'}           | M00157 | Saccharibacteria |
| GCA_013098655.1_ASM1309865v1 | {'K00627', 'K00382'}                                                                       | M00307 | Saccharibacteria |
| GCA_025273655.1_ASM2527365v1 | {'K01624', 'K00134', 'K00845', 'K00927', 'K01623', 'K01803', 'K15916', 'K00873'}           | M00001 | Saccharibacteria |
| GCA_025273655.1_ASM2527365v1 | {'K00927', 'K01803', 'K00134', 'K00873'}                                                   | M00002 | Saccharibacteria |
| GCA_025273655.1_ASM2527365v1 | {'K00033', 'K01057', 'K00036'}                                                             | M00006 | Saccharibacteria |
| GCA_025273655.1_ASM2527365v1 | {'K02108', 'K02112', 'K02111', 'K02115', 'K02110', 'K02113', 'K02114'}                     | M00157 | Saccharibacteria |
| GCA_025273655.1_ASM2527365v1 | {'K00382'}                                                                                 | M00307 | Saccharibacteria |



# Supplementary Table 3c. Metabolic module completeness of Saccharibacteria.

| Genome                                                | M00002 | M00086 | M00157 | M00417 | M00579 |
|-------------------------------------------------------|--------|--------|--------|--------|--------|
| GCA_003133385.1_20120500_P26                          | 0.8    | 0      | 1      | 1      | 0.5    |
| GCA_017991755.1_ASM1799175v1                          | 0.8    | 0      | 1      | 0      | 0.5    |
| GCA_025451045.1_ASM2545104v1                          | 0.6    | 0      | 1      | 1      | 0.5    |
| GCA_016699935.1_ASM1669993v1                          | 1      | 1      | 1      | 1      | 0      |
| GCA_946478995.1_SRR15094062_bin.6_metawrap_v1.3.0_MAG | 1      | 0      | 1      | 1      | 0      |
| GCA_016789655.1_ASM1678965v1                          | 1      | 0      | 1      | 1      | 0      |
| GCA_013289705.1_ASM1328970v1                          | 0.8    | 0      | 1      | 1      | 0      |
| GCA_016219345.1_ASM1621934v1                          | 0.6    | 0      | 1      | 1      | 0      |
| GCA_027356525.1_ASM2735652v1                          | 0.8    | 0      | 1      | 1      | 0      |
| GCA_002952755.1_ASM295275v1                           | 1      | 0      | 1      | 1      | 0.5    |
| GCA_016700375.1_ASM1670037v1                          | 0.8    | 0      | 1      | 1      | 0      |
| GCA_002792275.1_ASM279227v1                           | 0.4    | 0      | 1      | 1      | 0.5    |
| GCA_027315225.1_ASM2731522v1                          | 0.8    | 0      | 1      | 1      | 0      |
| GCA_016187125.1_ASM1618712v1                          | 0.6    | 0      | 1      | 0      | 0      |
| GCA_025928155.1_ASM2592815v1                          | 0.8    | 0      | 1      | 1      | 0.5    |
| GCA_016699955.1_ASM1669995v1                          | 0.8    | 0      | 1      | 1      | 0      |
| GCA_022841445.1_ASM2284144v1                          | 0.6    | 0      | 1      | 0      | 0      |
| GCA_002746885.1_ASM274688v1                           | 0.8    | 0      | 1      | 0      | 0      |
| GCA_001790525.1_ASM179052v1                           | 0.8    | 0      | 1      | 0      | 0      |
| GCA_020428005.1_ASM2042800v1                          | 0.6    | 0      | 1      | 1      | 0      |
| GCA_003962975.1_ASM396297v1                           | 0.8    | 0      | 1      | 0      | 0      |
| GCA_003153395.1_20120700_P3D                          | 0.6    | 0      | 1      | 1      | 0.5    |
| GCA_001003725.1_ASM100372v1                           | 0.6    | 0      | 1      | 1      | 0      |
| GCA_016700315.1_ASM1670031v1                          | 1      | 0      | 1      | 1      | 0      |
| GCA_002427805.1_ASM242780v1                           | 0.8    | 0      | 1      | 1      | 0      |
| GCA_016700395.1_ASM1670039v1                          | 0.6    | 0      | 1      | 0      | 0.5    |
| GCA_018001155.1_ASM1800115v1                          | 0.8    | 0      | 1      | 0      | 0.5    |
| GCA_027366415.1_ASM2736641v1                          | 0.6    | 1      | 1      | 1      | 0      |
| GCA_018060465.1_ASM1806046v1                          | 0.8    | 0      | 1      | 0      | 0      |
| GCA_027314885.1_ASM2731488v1                          | 0.6    | 0      | 1      | 1      | 0      |
| GCA_004294965.1_ASM429496v1                           | 0.8    | 0      | 1      | 1      | 0.5    |
| GCA_001790515.1_ASM179051v1                           | 0.6    | 0      | 1      | 1      | 0.5    |
| GCA_002404255.1_ASM240425v1                           | 1      | 0      | 1      | 1      | 0      |
| GCA_016699065.1_ASM1669906v1                          | 0.6    | 0      | 1      | 0      | 0.5    |
| GCA_003523165.1_ASM352316v1                           | 0.6    | 0      | 1      | 1      | 0      |
| GCA_000392435.1_ASM39243v1                            | 0.6    | 0      | 1      | 0      | 0.5    |
| GCA_016432585.1_ASM1643258v1                          | 1      | 0      | 1      | 1      | 0.5    |
| GCA_025450135.1_ASM2545013v1                          | 0.4    | 0      | 1      | 1      | 0      |
| GCA_002421785.1_ASM242178v1                           | 1      | 0      | 1      | 0      | 0.5    |
| GCA_015999875.1_ASM1599987v1                          | 0.8    | 0      | 1      | 1      | 0      |
| GCA_020428315.1_ASM2042831v1                          | 0.5    | 0      | 1      | 1      | 0      |
| GCA_003246575.1_ASM324657v1                           | 1      | 0      | 1      | 0      | 0.5    |
| GCA_002337155.1_ASM233715v1                           | 0.6    | 0      | 1      | 0      | 0.5    |
| GCA_002404125.1_ASM240412v1                           | 0.8    | 0      | 1      | 1      | 0.5    |
| GCA_002413795.1_ASM241379v1                           | 0.3    | 0      | 1      | 1      | 0      |
| GCA_024635495.1_ASM2463549v1                          | 1      | 0      | 1      | 1      | 0.5    |
| GCA_016187175.1_ASM1618717v1                          | 0.4    | 0      | 1      | 0      | 0      |
| GCA_016700355.1_ASM1670035v1                          | 0.6    | 0      | 1      | 0      | 0.5    |
| GCA_016789455.1_ASM1678945v1                          | 1      | 0      | 1      | 1      | 0      |
| GCA_002331045.1_ASM233104v1                           | 0.6    | 0      | 1      | 1      | 0      |
| GCA_002413865.1_ASM241386v1                           | 0.8    | 0      | 1      | 1      | 0.5    |
| GCA_025924835.1_ASM2592483v1                          | 0.6    | 0      | 1      | 1      | 0      |
| GCA_016700015.1_ASM1670001v1                          | 0.6    | 0      | 1      | 0      | 0.5    |
| GCA_027492635.1_ASM2749263v1                          | 0.8    | 0      | 1      | 1      | 0      |
| GCA_027427295.1_ASM2742729v1                          | 0.6    | 0      | 1      | 1      | 0      |
| GCA_001790445.1_ASM179044v1                           | 0.6    | 0      | 1      | 0      | 0.5    |
| GCA_001790365.1_ASM179036v1                           | 0.6    | 0      | 1      | 1      | 0.5    |
| GCA_002322785.1_ASM232278v1                           | 0.6    | 0      | 1      | 0      | 0.5    |
| GCA_001790435.1_ASM179043v1                           | 0.6    | 0      | 1      | 1      | 0.5    |
| GCA_002336935.1_ASM233693v1                           | 0.6    | 0      | 1      | 0      | 0.5    |
| GCA_002413755.1_ASM241375v1                           | 1      | 0      | 1      | 1      | 0      |
| GCA_017307155.1_ASM1730715v1                          | 1      | 0      | 1      | 1      | 0      |
| GCA_019352195.1_ASM1935219v1                          | 1      | 0      | 1      | 1      | 0      |
| GCA_027447005.1_ASM2744700v1                          | 0.6    | 0      | 1      | 1      | 0      |
| GCA_002429245.1_ASM242924v1                           | 0.6    | 0      | 1      | 1      | 0      |
| GCA_027450065.1_ASM2745006v1                          | 0.8    | 0      | 1      | 0      | 0.5    |
| GCA_015999865.1_ASM1599986v1                          | 0.6    | 0      | 1      | 0      | 0      |
| GCA_015999845.1_ASM1599984v1                          | 0.6    | 0      | 1      | 0      | 0      |

|                                                            |     |   |   |   |     |
|------------------------------------------------------------|-----|---|---|---|-----|
| GCA_016000075.1_ASM1600007v1                               | 0.6 | 0 | 1 | 0 | 0   |
| GCA_027426875.1_ASM2742687v1                               | 0.8 | 0 | 1 | 1 | 0.5 |
| GCA_009787015.1_ASM978701v1                                | 1   | 1 | 0 | 0 | 1   |
| GCA_002405335.1_ASM240533v1                                | 0.6 | 0 | 1 | 1 | 0.5 |
| GCA_022842995.1_ASM2284299v1                               | 0.6 | 0 | 1 | 1 | 0   |
| GCA_016176605.1_ASM1617660v1                               | 0.6 | 0 | 1 | 0 | 0   |
| GCA_002316545.1_ASM231654v1                                | 1   | 0 | 1 | 1 | 0   |
| GCA_002413835.1_ASM241383v1                                | 0.6 | 0 | 1 | 1 | 0.5 |
| GCA_003516025.1_ASM351602v1                                | 1   | 0 | 1 | 1 | 0   |
| GCA_009785095.1_ASM978509v1                                | 1   | 1 | 1 | 0 | 1   |
| GCA_022828285.1_ASM2282828v1                               | 1   | 0 | 1 | 0 | 0   |
| GCA_022819345.1_ASM2281934v1                               | 1   | 0 | 1 | 0 | 0   |
| GCA_001897305.1_ASM189730v1                                | 1   | 0 | 1 | 1 | 0   |
| GCA_903883035.1_freshwater_MAG_---_Umea_bin-05361          | 0.8 | 0 | 1 | 1 | 0   |
| GCA_015655045.1_ASM1565504v1                               | 1   | 0 | 1 | 1 | 0.5 |
| GCA_027427475.1_ASM2742747v1                               | 0.6 | 0 | 1 | 1 | 0   |
| GCA_016000245.1_ASM1600024v1                               | 0.8 | 0 | 1 | 1 | 0   |
| GCA_027427915.1_ASM2742791v1                               | 0.6 | 0 | 1 | 1 | 0   |
| GCA_001790385.1_ASM179038v1                                | 0.6 | 0 | 1 | 0 | 0   |
| GCA_025273655.1_ASM2527365v1                               | 0.6 | 0 | 1 | 1 | 0   |
| GCA_000503915.1_ASM50391v1                                 | 0.6 | 0 | 1 | 1 | 0   |
| GCA_002348615.1_ASM234861v1                                | 0.6 | 0 | 1 | 1 | 0.5 |
| GCA_002343645.1_ASM234364v1                                | 0.6 | 0 | 1 | 1 | 0.5 |
| GCA_002434055.1_ASM243405v1                                | 0.6 | 0 | 1 | 1 | 0.5 |
| GCA_027492975.1_ASM2749297v1                               | 1   | 0 | 1 | 0 | 0   |
| GCA_027327265.1_ASM2732726v1                               | 0.6 | 0 | 1 | 1 | 0   |
| GCA_009787245.1_ASM978724v1                                | 1   | 1 | 0 | 0 | 0.5 |
| GCA_027427135.1_ASM2742713v1                               | 0.4 | 0 | 1 | 1 | 0   |
| GCA_027446985.1_ASM2744698v1                               | 0.4 | 0 | 1 | 1 | 0   |
| GCA_027492255.1_ASM2749225v1                               | 0.6 | 0 | 1 | 0 | 0.5 |
| GCA_010014515.1_ASM1001451v1                               | 1   | 0 | 1 | 0 | 0   |
| GCA_002404195.1_ASM240419v1                                | 1   | 0 | 1 | 1 | 0   |
| GCA_027493025.1_ASM2749302v1                               | 1   | 0 | 1 | 0 | 0   |
| GCA_003537595.1_ASM353759v1                                | 0.6 | 0 | 1 | 1 | 0   |
| GCA_001029695.1_ASM102969v1                                | 0.6 | 0 | 1 | 0 | 0   |
| GCA_003508055.1_ASM350805v1                                | 0.6 | 0 | 1 | 0 | 0   |
| GCA_027427215.1_ASM2742721v1                               | 0.4 | 0 | 1 | 1 | 0   |
| GCA_003231925.1_ASM323192v1                                | 0.6 | 0 | 1 | 0 | 0.5 |
| GCA_017983575.1_ASM1798357v1                               | 0.6 | 0 | 1 | 0 | 0.5 |
| RDPYD18300075_A_saliva.metaspades.bin.22                   | 1   | 0 | 1 | 0 | 0   |
| GCA_020428475.1_ASM2042847v1                               | 0.8 | 0 | 1 | 0 | 0.5 |
| GCA_027331915.1_ASM2733191v1                               | 0.6 | 0 | 1 | 1 | 0   |
| GCA_001790535.1_ASM179053v1                                | 0.6 | 0 | 1 | 0 | 0   |
| GCA_943354985.1_Jr-19feb18-57                              | 0.5 | 0 | 1 | 0 | 0.5 |
| GCA_027312225.1_ASM2731222v1                               | 0.6 | 0 | 1 | 0 | 0   |
| GCA_027332225.1_ASM2733222v1                               | 0.1 | 0 | 1 | 1 | 0   |
| GCA_903856615.1_freshwater_MAG_---_AM-lipid-01-D3_bin-1021 | 0.6 | 0 | 1 | 1 | 0   |
| GCA_903829335.1_freshwater_MAG_---_AM-lipid-02-D1_bin-0304 | 0.6 | 0 | 1 | 1 | 0   |
| GCA_903840315.1_freshwater_MAG_---_AM-lipid-02-D2_bin-0413 | 0.6 | 0 | 1 | 1 | 0   |
| GCA_027426975.1_ASM2742697v1                               | 0.6 | 0 | 1 | 1 | 0   |
| GCA_005697565.1_ASM569756v1                                | 1   | 0 | 1 | 0 | 0   |
| GCA_016191105.1_ASM1619110v1                               | 0.8 | 0 | 1 | 0 | 0   |
| YS000029_saliva.spades.bin.8                               | 1   | 0 | 1 | 0 | 0   |
| GCA_001897295.1_ASM189729v1                                | 0.6 | 0 | 1 | 1 | 0.5 |
| GCA_903894915.1_freshwater_MAG_---_AlinenLipids_bin-5330   | 0.6 | 0 | 1 | 1 | 0   |
| GCA_027426955.1_ASM2742695v1                               | 0.6 | 0 | 1 | 1 | 0   |
| GCA_027449065.1_ASM2744906v1                               | 0.8 | 0 | 1 | 1 | 0.5 |
| SZAXPI018316-18_RA_dental.metaspades.bin.5                 | 0.6 | 0 | 1 | 0 | 0.5 |
| SRR8114033.metaspades.bin.42                               | 0.8 | 0 | 1 | 0 | 0   |
| GCA_002335175.1_ASM233517v1                                | 0.6 | 0 | 1 | 1 | 0.5 |
| GCA_002433925.1_ASM243392v1                                | 0.6 | 0 | 1 | 1 | 0.5 |
| GCA_002425115.1_ASM242511v1                                | 0.6 | 0 | 1 | 1 | 0.5 |
| YS000143_saliva.spades.bin.5                               | 1   | 0 | 1 | 0 | 0   |
| RDPYD18189833_A_saliva.metaspades.bin.38                   | 1   | 0 | 1 | 0 | 0   |
| GCA_002343385.1_ASM234338v1                                | 0.6 | 0 | 1 | 1 | 0.5 |
| GCA_903925195.1_freshwater_MAG_---_YR_bin-4708             | 0.6 | 0 | 1 | 1 | 0   |
| GCA_002344735.1_ASM234473v1                                | 0.6 | 0 | 1 | 1 | 0.5 |
| GCA_027366295.1_ASM2736629v1                               | 0.6 | 0 | 1 | 1 | 0.5 |
| GCA_027427775.1_ASM2742777v1                               | 0.6 | 0 | 1 | 1 | 0   |
| GCA_946893605.1_PRJEB56001                                 | 1   | 0 | 1 | 0 | 0   |
| YS000609_saliva.spades.bin.19                              | 1   | 0 | 1 | 0 | 0   |
| GCA_903877025.1_freshwater_MAG_---_AlinenLipids_bin-2261   | 0.8 | 1 | 1 | 1 | 0   |
| GCA_002455275.1_ASM245527v1                                | 1   | 0 | 1 | 1 | 0   |
| GCA_026395405.1_ASM2639540v1                               | 0.2 | 0 | 1 | 0 | 0.5 |
| GCA_015257705.1_ASM1525770v1                               | 1   | 0 | 1 | 0 | 0   |
| GCA_027426995.1_ASM2742699v1                               | 0.6 | 0 | 1 | 1 | 0   |
| RSZYD18078809_A_saliva.metaspades.bin.65                   | 1   | 0 | 1 | 0 | 0   |
| GCA_026395375.1_ASM2639537v1                               | 1   | 0 | 1 | 1 | 0   |

|                                                            |     |   |   |   |     |
|------------------------------------------------------------|-----|---|---|---|-----|
| GCA_013100825.1_ASM1310082v1                               | 1   | 0 | 1 | 0 | 0.5 |
| GCA_005697055.1_ASM569705v1                                | 1   | 0 | 1 | 0 | 0.5 |
| GCA_013098655.1_ASM1309865v1                               | 1   | 0 | 1 | 0 | 0.5 |
| GCA_016699895.1_ASM1669989v1                               | 1   | 0 | 1 | 0 | 0   |
| GCA_003164595.1_20120700_S1D                               | 0.4 | 1 | 1 | 1 | 0.5 |
| GCA_021222645.1_ASM2122264v1                               | 1   | 0 | 1 | 0 | 0   |
| GCA_010201925.1_ASM1020192v1                               | 1   | 0 | 1 | 0 | 0.5 |
| GCA_020912025.1_ASM2091202v1                               | 1   | 0 | 1 | 0 | 0   |
| GCA_027426775.1_ASM2742677v1                               | 0.6 | 0 | 1 | 1 | 0.5 |
| RSZYD18187656_A_saliva.metaspades.bin.41                   | 1   | 0 | 1 | 0 | 0   |
| GCA_027427415.1_ASM2742741v1                               | 0.6 | 0 | 1 | 1 | 0   |
| GCA_946482575.1_SRR14536435_bin.26_metawrap_v1.3.0_MAG     | 1   | 0 | 1 | 1 | 0   |
| RSZYD18187237_A_saliva.metaspades.bin.71                   | 1   | 0 | 1 | 0 | 0   |
| R0170300282_tooth_RAH.megahit.bin.3                        | 0.6 | 0 | 1 | 0 | 0.5 |
| R0170300325_tooth_RA.megahit.bin.68                        | 0.6 | 0 | 1 | 0 | 0.5 |
| SZAXPI011699-166_RA_dental.metaspades.bin.36               | 1   | 0 | 1 | 0 | 0   |
| GCA_013334475.1_ASM1333447v1                               | 0.8 | 0 | 1 | 0 | 0.5 |
| RSZYD18078790_A_saliva.metaspades.bin.58                   | 1   | 0 | 1 | 0 | 0   |
| GCA_027427235.1_ASM2742723v1                               | 0.6 | 0 | 1 | 0 | 0   |
| GCA_027427255.1_ASM2742725v1                               | 0.6 | 0 | 1 | 0 | 0   |
| GCA_027427195.1_ASM2742719v1                               | 0.6 | 0 | 1 | 0 | 0   |
| GCA_027325955.1_ASM2732595v1                               | 0.4 | 0 | 1 | 1 | 0.5 |
| GCA_020428275.1_ASM2042827v1                               | 0.6 | 0 | 1 | 1 | 0.5 |
| GCA_027331975.1_ASM2733197v1                               | 0.6 | 0 | 1 | 1 | 0   |
| GCA_903859325.1_freshwater_MAG_---_AM-lipid-02-D3_bin-0230 | 0.6 | 0 | 1 | 1 | 0   |
| RSZAXPI002674-21_RA_dental.metaspades.bin.42               | 1   | 0 | 1 | 0 | 0.5 |
| GCA_001790625.1_ASM179062v1                                | 0.4 | 0 | 1 | 1 | 0.5 |
| GCA_927911635.1_ERR3827207_bin.3_metaWRAP_v1.1_MAG         | 0.2 | 0 | 1 | 0 | 0.5 |
| R0170300200_tooth_RA.megahit.bin.64                        | 0.9 | 0 | 1 | 0 | 0   |
| R0170300196_tooth_RA.megahit.bin.11                        | 0.6 | 0 | 1 | 0 | 0.5 |
| R0170300062_tooth_RA.megahit.bin.52                        | 0.8 | 0 | 1 | 0 | 0   |
| YS001048_saliva.spades.bin.21                              | 1   | 0 | 1 | 0 | 0   |
| GCA_018062785.1_ASM1806278v1                               | 0.8 | 0 | 1 | 1 | 0.5 |
| GCA_027427515.1_ASM2742751v1                               | 0.6 | 0 | 1 | 0 | 0.5 |
| GCA_905372385.1_SRR9217408-mag-bin.1                       | 0.9 | 0 | 1 | 0 | 0   |
| R0170300129_tooth_RA.megahit.bin.17                        | 0.8 | 0 | 1 | 0 | 0   |
| GCA_001788565.1_ASM178856v1                                | 0.4 | 0 | 1 | 1 | 0.5 |
| SRR8114063.metaspades.bin.48                               | 1   | 0 | 1 | 0 | 0   |
| GCA_027427595.1_ASM2742759v1                               | 0.6 | 0 | 1 | 0 | 0.5 |
| R0170300319_tooth_RAH.megahit.bin.124                      | 0.6 | 0 | 1 | 0 | 0.5 |
| RSZYD18187790_A_saliva.metaspades.bin.35                   | 1   | 0 | 1 | 0 | 0   |
| RSZYD18187484_A_saliva.metaspades.bin.51                   | 1   | 0 | 1 | 0 | 0   |
| RSZYD18187690_A_saliva.metaspades.bin.20                   | 1   | 0 | 1 | 0 | 0   |
| SZAXPI018488-20_RA_saliva.metaspades.bin.49                | 0.9 | 0 | 1 | 0 | 0.5 |
| SZAXPI018317-19_RA_dental.metaspades.bin.46                | 0.9 | 0 | 1 | 0 | 0.5 |
| RSZYD18187118_A_saliva.metaspades.bin.24                   | 1   | 0 | 1 | 0 | 0   |
| YS000373_saliva.spades.bin.23                              | 1   | 0 | 1 | 0 | 0   |
| RSZYD18187057_A_saliva.metaspades.bin.25                   | 1   | 0 | 1 | 0 | 0   |
| YS000282_saliva.spades.bin.24                              | 0.9 | 0 | 1 | 0 | 0   |
| RSZYD18187244_A_saliva.metaspades.bin.38                   | 1   | 0 | 1 | 0 | 0   |
| RDPYD18189988_A_saliva.metaspades.bin.51                   | 1   | 0 | 1 | 0 | 0   |
| GCA_002452155.1_ASM245215v1                                | 0.4 | 0 | 1 | 0 | 0   |
| GCA_027328705.1_ASM2732870v1                               | 0.8 | 0 | 1 | 1 | 0.5 |
| GCA_027427715.1_ASM2742771v1                               | 0.6 | 0 | 1 | 0 | 0.5 |
| GCA_013098855.1_ASM1309885v1                               | 1   | 0 | 1 | 0 | 0.5 |
| R0170300229_tooth_RA.megahit.bin.48                        | 1   | 0 | 1 | 0 | 0.5 |
| GCA_905372835.1_SRR9217428-mag-bin.30                      | 1   | 0 | 1 | 0 | 0   |
| R0170300272_tooth_RAH.megahit.bin.87                       | 0.9 | 0 | 1 | 0 | 0   |
| GCA_013099195.1_ASM1309919v1                               | 1   | 0 | 1 | 0 | 0.5 |
| RSZYD18078444_A_saliva.metaspades.bin.56                   | 1   | 0 | 1 | 0 | 0   |
| GCA_015663315.1_ASM1566331v1                               | 0.8 | 0 | 1 | 0 | 0   |
| GCA_012965045.1_ASM1296504v1                               | 0.8 | 0 | 1 | 0 | 0   |
| GCA_005697215.1_ASM569721v1                                | 1   | 0 | 1 | 0 | 0.5 |
| GCA_018062805.1_ASM1806280v1                               | 0.8 | 0 | 1 | 0 | 0.5 |
| GCA_027427155.1_ASM2742715v1                               | 0.4 | 0 | 1 | 1 | 0   |
| R0170300198_tooth_RA.megahit.bin.28                        | 1   | 0 | 1 | 0 | 0   |
| GCA_002343565.1_ASM234356v1                                | 0.6 | 0 | 1 | 1 | 0.5 |
| GCA_027427495.1_ASM2742749v1                               | 0.6 | 0 | 1 | 0 | 0.5 |
| GCA_016866755.1_JGI_2017-08-21                             | 0.8 | 0 | 1 | 0 | 0   |
| RSZYD18078148_A_saliva.metaspades.bin.88                   | 1   | 0 | 1 | 0 | 0   |
| RSZAXPI002318-27_RAH_dental.metaspades.bin.13              | 0.6 | 0 | 1 | 0 | 0.5 |
| RDPYD18088981_A_saliva.metaspades.bin.41                   | 1   | 0 | 1 | 0 | 0   |
| RDPYD18189828_A_saliva.metaspades.bin.6                    | 1   | 0 | 1 | 0 | 0   |
| RSZAXPI002619-34_RA_dental.metaspades.bin.39               | 0.9 | 0 | 1 | 0 | 0.5 |
| R0170300306_tooth_RAH.megahit.bin.30                       | 0.9 | 0 | 1 | 0 | 0.5 |
| R0170300183_tooth_RA.megahit.bin.5                         | 1   | 0 | 1 | 0 | 0.5 |
| GCA_027427655.1_ASM2742765v1                               | 0.6 | 0 | 1 | 0 | 0.5 |
| GCA_027426835.1_ASM2742683v1                               | 0.8 | 0 | 1 | 1 | 0.5 |



|                                                        |     |   |   |   |     |
|--------------------------------------------------------|-----|---|---|---|-----|
| GCA_004100325.1_ASM410032v1                            | 0.6 | 0 | 1 | 1 | 0   |
| RSZYD18187511_A_saliva.metaspades.bin.2                | 1   | 0 | 1 | 0 | 0   |
| RSZYD18187556_A_saliva.metaspades.bin.16               | 1   | 0 | 1 | 0 | 0   |
| SRR8114009.metaspades.bin.3                            | 1   | 0 | 1 | 0 | 0   |
| GCA_946482285.1_SRR14536431_bin.16_metawrap_v1.3.0_MAG | 1   | 0 | 1 | 0 | 0.5 |
| YS001129_saliva.spades.bin.13                          | 1   | 0 | 1 | 0 | 0   |
| YS000928_saliva.spades.bin.8                           | 1   | 0 | 1 | 0 | 0   |
| R0170300274_tooth_RAH.megahit.bin.32                   | 0.9 | 0 | 1 | 0 | 0.5 |
| R0170300267_tooth_RAH.megahit.bin.64                   | 0.9 | 0 | 1 | 0 | 0   |
| GCA_027338765.1_ASM2733876v1                           | 0.8 | 0 | 1 | 0 | 0.5 |
| SZAXPI018318-20_RA_dental.metaspades.bin.38            | 0.8 | 0 | 1 | 0 | 0   |
| YS000208_saliva.spades.bin.26                          | 1   | 0 | 1 | 0 | 0   |
| SZAXPI018357-22_RA_saliva.metaspades.bin.71            | 0.8 | 0 | 1 | 0 | 0   |
| GCA_023257815.1_ASM2325781v1                           | 0.4 | 0 | 1 | 1 | 0   |
| GCA_002441585.1_ASM244158v1                            | 0.6 | 0 | 1 | 1 | 0.5 |
| GCA_905372725.1_SRR9217423-mag-bin.8                   | 0.8 | 0 | 1 | 0 | 0   |
| GCA_022828295.1_ASM2282829v1                           | 1   | 0 | 1 | 0 | 0   |
| GCA_027427675.1_ASM2742767v1                           | 0.6 | 0 | 1 | 0 | 0.5 |
| GCA_027427695.1_ASM2742769v1                           | 0.6 | 0 | 1 | 0 | 0.5 |
| GCA_027323755.1_ASM2732375v1                           | 0.6 | 0 | 1 | 0 | 0.5 |
| GCA_027351585.1_ASM2735158v1                           | 0.8 | 0 | 1 | 1 | 0   |
| R0170300246_tooth_RAH.megahit.bin.19                   | 1   | 0 | 1 | 0 | 0.5 |
| RSZAXPI002625-57_RA_dental.metaspades.bin.44           | 1   | 0 | 1 | 0 | 0.5 |
| R0170300260_tooth_RAH.megahit.bin.16                   | 0.9 | 0 | 1 | 0 | 0.5 |
| RSZYD18187200_A_saliva.metaspades.bin.37               | 1   | 0 | 1 | 0 | 0   |
| RSZYD18187002_A_saliva.metaspades.bin.59               | 1   | 0 | 1 | 0 | 0   |
| R0170300060_tooth_RA.megahit.bin.92                    | 1   | 0 | 1 | 0 | 0.5 |
| GCA_026395435.1_ASM2639543v1                           | 0.8 | 0 | 1 | 0 | 0.5 |
| GCA_002304695.1_ASM230469v1                            | 0.1 | 0 | 1 | 1 | 0.5 |
| R0170300221_tooth_RA.megahit.bin.80                    | 1   | 0 | 1 | 0 | 0.5 |
| GCA_027427015.1_ASM2742701v1                           | 0.6 | 0 | 1 | 0 | 0.5 |
| GCA_013098515.1_ASM1309851v1                           | 1   | 0 | 1 | 0 | 0.5 |
| R0170300055_tooth_RA.megahit.bin.5                     | 0.6 | 0 | 1 | 0 | 0.5 |
| GCA_027427835.1_ASM2742783v1                           | 0.6 | 0 | 1 | 1 | 0   |
| R0170300127_tooth_RA.megahit.bin.30                    | 1   | 0 | 1 | 0 | 0   |
| R0170300295_tooth_RAH.megahit.bin.55                   | 0.6 | 0 | 1 | 0 | 0.5 |
| GCA_027427575.1_ASM2742757v1                           | 0.6 | 0 | 1 | 0 | 0.5 |
| YS000726_saliva.spades.bin.20                          | 1   | 0 | 1 | 0 | 0   |
| GCA_027427535.1_ASM2742753v1                           | 0.6 | 0 | 1 | 0 | 0.5 |
| GCA_002434045.1_ASM243404v1                            | 0.6 | 0 | 1 | 1 | 0   |
| RDPYD18088968_A_saliva.metaspades.bin.21               | 1   | 0 | 1 | 0 | 0   |
| RDPYD18098961_A_saliva.metaspades.bin.6                | 1   | 0 | 1 | 0 | 0   |
| RSZAXPI002613-24_RA_dental.metaspades.bin.48           | 0.8 | 0 | 1 | 0 | 0   |
| SZAXPI018486-18_RA_saliva.metaspades.bin.17            | 0.8 | 0 | 1 | 0 | 0   |
| GCA_002413425.1_ASM241342v1                            | 0.6 | 0 | 1 | 0 | 0.5 |
| R0170300251_tooth_RAH.megahit.bin.14                   | 0.9 | 0 | 1 | 0 | 0   |
| RSZAXPI002321-33_RAH_dental.metaspades.bin.23          | 0.6 | 0 | 1 | 0 | 0.5 |
| GCA_905365145.1_ERZ1644999-mag-bin.1                   | 0.9 | 0 | 1 | 0 | 0.5 |
| RDPYD18099005_A_saliva.metaspades.bin.66               | 1   | 0 | 1 | 0 | 0   |
| R0170300202_tooth_RA.megahit.bin.78                    | 0.9 | 0 | 1 | 0 | 0   |
| YS001023_saliva.spades.bin.13                          | 1   | 0 | 1 | 0 | 0   |
| RSZYD18187874_A_saliva.metaspades.bin.29               | 1   | 0 | 1 | 0 | 0   |
| SZAXPI018285-113_RA_dental.metaspades.bin.57           | 0.6 | 0 | 1 | 0 | 0.5 |
| RSZYD18078531_A_saliva.metaspades.bin.36               | 1   | 0 | 1 | 0 | 0   |
| GCA_946478715.1_SRR10754055_bin.5_metawrap_v1.3.0_MAG  | 0.4 | 0 | 1 | 1 | 0   |
| GCA_022828255.1_ASM2282825v1                           | 1   | 0 | 1 | 0 | 0   |
| GCA_947302355.1_SRR10912539_bin.48_metaWRAP_v1.3_MAG   | 1   | 1 | 0 | 0 | 1   |
| SZAXPI018315-17_RA_dental.metaspades.bin.12            | 0.6 | 0 | 1 | 0 | 0.5 |
| GCA_010202645.1_ASM1020264v1                           | 1   | 0 | 1 | 0 | 0.5 |
| RSZYD18187442_A_saliva.metaspades.bin.35               | 1   | 0 | 1 | 0 | 0   |
| GCA_017513905.1_ASM1751390v1                           | 1   | 1 | 0 | 0 | 0.5 |
| SZAXPI018320-22_RA_dental.metaspades.bin.16            | 0.9 | 0 | 1 | 0 | 0.5 |
| GCA_905371785.1_SRR9217391-mag-bin.4                   | 0.9 | 0 | 1 | 0 | 0.5 |
| SZAXPI018323-25_RA_dental.metaspades.bin.7             | 1   | 0 | 1 | 0 | 0.5 |
| R0170300285_tooth_RAH.megahit.bin.44                   | 0.9 | 0 | 1 | 0 | 0   |
| GCA_027427615.1_ASM2742761v1                           | 0.6 | 0 | 1 | 0 | 0.5 |
| GCA_027427555.1_ASM2742755v1                           | 0.6 | 0 | 1 | 0 | 0.5 |
| RSZAXPI002673-20_RA_dental.metaspades.bin.25           | 1   | 0 | 1 | 0 | 0.5 |
| YS000581_saliva.spades.bin.8                           | 1   | 0 | 1 | 0 | 0   |
| RSZYD18078438_A_saliva.metaspades.bin.6                | 1   | 0 | 1 | 0 | 0   |
| RSZYD18187694_A_saliva.metaspades.bin.6                | 1   | 0 | 1 | 0 | 0   |
| GCA_013333675.2_ASM1333367v2                           | 0.9 | 0 | 1 | 0 | 0   |
| R0170300299_tooth_RAH.megahit.bin.100                  | 0.6 | 0 | 1 | 0 | 0.5 |
| GCA_027459425.1_ASM2745942v1                           | 0.5 | 0 | 1 | 1 | 0   |
| RSZAXPI002627-75_RA_dental.metaspades.bin.12           | 0.8 | 0 | 1 | 0 | 0   |
| RDPYD18098912_A_saliva.metaspades.bin.17               | 1   | 0 | 1 | 0 | 0   |
| GCA_010202265.1_ASM1020226v1                           | 1   | 0 | 1 | 0 | 0.5 |
| R0170300150_tooth_RA.megahit.bin.66                    | 0.6 | 0 | 1 | 0 | 0.5 |

|                                                        |     |   |   |   |     |
|--------------------------------------------------------|-----|---|---|---|-----|
| YS000754_saliva.spades.bin.30                          | 1   | 0 | 1 | 0 | 0   |
| RDPYD18098959_A_saliva.metaspades.bin.38               | 1   | 0 | 1 | 0 | 0   |
| RDPYD18201694_A_saliva.metaspades.bin.10               | 1   | 0 | 1 | 0 | 0   |
| RSZYD18187554_A_saliva.metaspades.bin.21               | 1   | 0 | 1 | 0 | 0   |
| R0170300258_tooth_RAH.megahit.bin.41                   | 0.6 | 0 | 1 | 0 | 0.5 |
| R0170300298_tooth_RAH.megahit.bin.133                  | 0.9 | 0 | 1 | 0 | 0.5 |
| GCA_017514145.1_ASM1751414v1                           | 1   | 1 | 0 | 0 | 1   |
| R0170300304_tooth_RAH.megahit.bin.45                   | 1   | 0 | 1 | 0 | 0   |
| RSZAXPI002604-26_RA_dental.metaspades.bin.30           | 1   | 0 | 1 | 0 | 0   |
| GCA_022819365.1_ASM2281936v1                           | 1   | 0 | 1 | 0 | 0   |
| GCA_020427985.1_ASM2042798v1                           | 0.8 | 0 | 1 | 1 | 0.5 |
| GCA_002441145.1_ASM244114v1                            | 0.6 | 0 | 1 | 0 | 0.5 |
| R0170300253_tooth_RAH.megahit.bin.35                   | 0.9 | 0 | 1 | 0 | 0   |
| RDPYD18097666_A_saliva.metaspades.bin.15               | 1   | 0 | 1 | 0 | 0   |
| GCA_013100805.1_ASM1310080v1                           | 1   | 0 | 1 | 0 | 0.5 |
| GCA_013333485.2_ASM1333348v2                           | 1   | 0 | 1 | 0 | 0.5 |
| R0170300199_tooth_RA.megahit.bin.62                    | 0.6 | 0 | 1 | 0 | 0.5 |
| R0170300133_tooth_RA.megahit.bin.23                    | 1   | 0 | 1 | 0 | 0.5 |
| GCA_023253175.1_ASM2325317v1                           | 0.8 | 0 | 1 | 1 | 0   |
| R0170300139_tooth_RA.megahit.bin.75                    | 1   | 0 | 1 | 0 | 0   |
| RSZAXPI002304-13_RAH_dental.metaspades.bin.45          | 0.8 | 0 | 1 | 0 | 0   |
| GCA_900556885.1_UMGS1986                               | 0.8 | 0 | 1 | 0 | 0   |
| GCA_002404315.1_ASM240431v1                            | 0.6 | 0 | 1 | 0 | 0.5 |
| RDPYD18088989_A_saliva.metaspades.bin.19               | 1   | 0 | 1 | 0 | 0   |
| GCA_022828365.1_ASM2282836v1                           | 1   | 0 | 1 | 0 | 0   |
| RSZAXPI002318-27_RAH_dental.metaspades.bin.2           | 0.8 | 0 | 1 | 0 | 0   |
| GCA_026395395.1_ASM2639539v1                           | 0.4 | 0 | 1 | 0 | 0   |
| RSZYD18187792_A_saliva.metaspades.bin.31               | 1   | 0 | 1 | 0 | 0   |
| GCA_905373795.1_SRR9217490-mag-bin.5                   | 1   | 0 | 1 | 0 | 0   |
| YS000246_saliva.spades.bin.34                          | 1   | 0 | 1 | 0 | 0   |
| GCA_024635455.1_ASM2463545v1                           | 1   | 0 | 1 | 0 | 0   |
| RDPYD18189930_A_saliva.metaspades.bin.8                | 1   | 0 | 1 | 0 | 0   |
| R0170300252_tooth_RAH.megahit.bin.91                   | 0.6 | 0 | 1 | 0 | 0.5 |
| R0170300193_tooth_RA.megahit.bin.72                    | 0.9 | 0 | 1 | 0 | 0.5 |
| R0170300125_tooth_RA.megahit.bin.2                     | 0.8 | 0 | 1 | 0 | 0   |
| YS001157_saliva.spades.bin.8                           | 1   | 0 | 1 | 0 | 0   |
| RDPYD18300300_A_saliva.metaspades.bin.61               | 1   | 0 | 1 | 0 | 0   |
| RSZYD18187508_A_saliva.metaspades.bin.8                | 1   | 0 | 1 | 0 | 0   |
| GCA_002381545.1_ASM238154v1                            | 0.6 | 0 | 1 | 0 | 0.5 |
| GCA_009776375.1_ASM977637v1                            | 1   | 1 | 1 | 0 | 1   |
| SZAXPI018284-111_RA_dental.metaspades.bin.60           | 0.9 | 0 | 1 | 0 | 0.5 |
| GCA_027492735.1_ASM2749273v1                           | 1   | 0 | 1 | 0 | 0   |
| R0170300161_tooth_RA.megahit.bin.8                     | 0.9 | 0 | 1 | 0 | 0   |
| GCA_002425145.1_ASM242514v1                            | 0.6 | 0 | 1 | 1 | 0   |
| GCA_002344715.1_ASM234471v1                            | 0.6 | 0 | 1 | 1 | 0   |
| RDPYD18300395_A_saliva.metaspades.bin.59               | 1   | 0 | 1 | 0 | 0   |
| R0170300120_tooth_RA.megahit.bin.47                    | 1   | 0 | 1 | 0 | 0.5 |
| GCA_946480535.1_SRR14536364_bin.32_metawrap_v1.3.0_MAG | 0.6 | 0 | 1 | 1 | 0   |
| GCA_903839435.1_freshwater_MAG_---_Kiruna_bin-08663    | 0.6 | 0 | 1 | 1 | 0   |
| R0170300189_tooth_RA.megahit.bin.69                    | 1   | 0 | 1 | 0 | 0   |
| R0170300235_tooth_RAH.megahit.bin.34                   | 0.8 | 0 | 1 | 0 | 0   |
| SZAXPI018286-123_RA_dental.metaspades.bin.62           | 0.9 | 0 | 1 | 0 | 0.5 |
| R0170300285_tooth_RAH.megahit.bin.82                   | 0.6 | 0 | 1 | 0 | 0.5 |
| SZAXPI018287-129_RA_dental.metaspades.bin.34           | 0.9 | 0 | 1 | 0 | 0   |
| RSZYD18187171_A_saliva.metaspades.bin.47               | 1   | 0 | 1 | 0 | 0   |
| SZAXPI018190-56_RA_dental.metaspades.bin.33            | 0.8 | 0 | 1 | 0 | 0   |
| GCA_015257555.2_ASM1525755v2                           | 0.8 | 0 | 1 | 0 | 0   |
| GCA_027427795.1_ASM2742779v1                           | 0.4 | 0 | 1 | 1 | 0   |
| SRR6748220.metaspades.bin.9                            | 1   | 0 | 1 | 0 | 0   |
| RSZYD18187626_A_saliva.metaspades.bin.21               | 1   | 0 | 1 | 0 | 0   |
| RSZYD18187722_A_saliva.metaspades.bin.7                | 0.8 | 0 | 1 | 0 | 0   |
| SZAXPI018400-40_RA_saliva.metaspades.bin.35            | 1   | 0 | 1 | 0 | 0   |
| GCA_947097435.1_SRR8786267_bin.5_metaWRAP_v1.3_MAG     | 1   | 0 | 1 | 0 | 0.5 |
| SZAXPI018097-18_RA_dental.metaspades.bin.33            | 0.8 | 0 | 1 | 0 | 0   |
| R0170300141_tooth_RA.megahit.bin.64                    | 0.8 | 0 | 1 | 0 | 0   |
| SRR6748116.metaspades.bin.2                            | 1   | 0 | 1 | 0 | 0   |
| GCA_022828375.1_ASM2282837v1                           | 1   | 0 | 1 | 0 | 0   |
| R0170300257_tooth_RAH.megahit.bin.108                  | 0.6 | 0 | 1 | 0 | 0.5 |
| R0170300161_tooth_RA.megahit.bin.38                    | 0.8 | 0 | 1 | 0 | 0   |
| R0170300271_tooth_RAH.megahit.bin.97                   | 0.6 | 0 | 1 | 0 | 0.5 |
| RSZYD18187400_A_saliva.metaspades.bin.14               | 0.8 | 0 | 1 | 0 | 0   |
| R0170300051_tooth_RA.megahit.bin.53                    | 0.6 | 0 | 1 | 0 | 0.5 |
| R0170300052_tooth_RA.megahit.bin.177                   | 0.9 | 0 | 1 | 0 | 0   |
| GCA_027340605.1_ASM2734060v1                           | 0.6 | 0 | 1 | 1 | 0   |
| GCA_905372305.1_SRR9217408-mag-bin.12                  | 1   | 0 | 1 | 0 | 0   |
| SZAXPI018323-25_RA_dental.metaspades.bin.51            | 0.8 | 0 | 1 | 0 | 0.5 |
| GCA_017510425.1_ASM1751042v1                           | 1   | 1 | 0 | 0 | 1   |
| GCA_916720665.1_SRR15235659_bin.7_metaWRAP_v1.1_MAG    | 1   | 0 | 1 | 0 | 0   |

|                                                    |     |   |   |   |     |
|----------------------------------------------------|-----|---|---|---|-----|
| R0170300253_tooth_RAH.megahit.bin.13               | 0.6 | 0 | 1 | 0 | 0.5 |
| RSZYD18187184_A_saliva.metaspades.bin.10           | 1   | 0 | 1 | 0 | 0   |
| SZAXPI018096-17_RA_dental.metaspades.bin.7         | 0.9 | 0 | 1 | 0 | 0   |
| GCA_014377695.1_ASM1437769v1                       | 0.4 | 0 | 1 | 1 | 0   |
| GCA_027427395.1_ASM2742739v1                       | 0.6 | 0 | 1 | 0 | 0   |
| RDPYD18098804_A_saliva.metaspades.bin.34           | 1   | 0 | 1 | 0 | 0   |
| R0170300307_tooth_RAH.megahit.bin.81               | 0.9 | 0 | 1 | 0 | 0   |
| R0170300157_tooth_RA.megahit.bin.74                | 0.9 | 0 | 1 | 0 | 0   |
| SZAXPI018188-46_RA_dental.metaspades.bin.49        | 0.6 | 0 | 1 | 0 | 0.5 |
| SZAXPI018280-95_RA_dental.metaspades.bin.20        | 0.6 | 0 | 1 | 0 | 0.5 |
| R0170300053_tooth_RA.megahit.bin.84                | 0.9 | 0 | 1 | 0 | 0   |
| R0170300231_tooth_RA.megahit.bin.10                | 0.8 | 0 | 1 | 0 | 0   |
| GCA_013815785.1_ASM1381578v1                       | 0.6 | 0 | 1 | 1 | 0   |
| YS001064_saliva.spades.bin.3                       | 1   | 0 | 1 | 0 | 0   |
| GCA_943358135.1_MsH-01oct19-288                    | 0.6 | 0 | 1 | 0 | 0   |
| RSZAXPI002633-90_RA_dental.metaspades.bin.41       | 0.8 | 0 | 1 | 0 | 0   |
| GCA_002792255.1_ASM279225v1                        | 0.3 | 0 | 1 | 0 | 0.5 |
| RSZYD18187273_A_saliva.metaspades.bin.58           | 1   | 0 | 1 | 0 | 0   |
| R0170300117_tooth_RA.megahit.bin.12                | 0.9 | 0 | 1 | 0 | 0   |
| YS000592_saliva.spades.bin.16                      | 1   | 0 | 1 | 0 | 0   |
| SZAXPI018288-133_RA_dental.metaspades.bin.4        | 0.4 | 0 | 1 | 0 | 0.5 |
| R0170300261_tooth_RAH.megahit.bin.18               | 0.8 | 0 | 1 | 0 | 0   |
| GCA_027450165.1_ASM2745016v1                       | 0.6 | 0 | 1 | 1 | 0.5 |
| SZAXPI018181-37_RA_dental.metaspades.bin.31        | 1   | 0 | 1 | 0 | 0   |
| RDPYD18300006_A_saliva.metaspades.bin.7            | 1   | 0 | 1 | 0 | 0   |
| YS000376_saliva.spades.bin.26                      | 1   | 0 | 1 | 0 | 0   |
| RDPYD18088987_A_saliva.metaspades.bin.6            | 1   | 0 | 1 | 0 | 0   |
| RSZYD18187123_A_saliva.metaspades.bin.13           | 1   | 0 | 1 | 0 | 0   |
| GCA_947098845.1_SRR8786267_bin.6_metaWRAP_v1.3_MAG | 0.9 | 0 | 1 | 0 | 0   |
| SZAXPI018276-89_RA_dental.metaspades.bin.7         | 0.8 | 0 | 1 | 0 | 0   |
| GCA_946618085.1_SRR873610_bin.1_metaWRAP_v1.3_MAG  | 1   | 1 | 0 | 0 | 1   |
| GCA_002363125.1_ASM236312v1                        | 1   | 1 | 0 | 0 | 1   |
| RSZYD18187903_A_saliva.metaspades.bin.45           | 1   | 0 | 1 | 0 | 0   |
| SZAXPI018282-108_RA_dental.metaspades.bin.30       | 0.8 | 0 | 1 | 0 | 0   |
| RSZYD18078399_A_saliva.metaspades.bin.40           | 1   | 0 | 1 | 0 | 0   |
| SZAXPI018102-23_RA_dental.metaspades.bin.20        | 0.6 | 0 | 1 | 0 | 0.5 |
| RSZYD18078489_A_saliva.metaspades.bin.18           | 1   | 0 | 1 | 0 | 0   |
| RSZYD18078172_A_saliva.metaspades.bin.34           | 1   | 0 | 1 | 0 | 0   |
| RDPYD18300152_A_saliva.metaspades.bin.25           | 1   | 0 | 1 | 0 | 0   |
| R0170300226_tooth_RA.megahit.bin.18                | 0.8 | 0 | 1 | 0 | 0   |
| R0170300222_tooth_RA.megahit.bin.139               | 1   | 0 | 1 | 0 | 0.5 |
| GCA_017510665.1_ASM1751066v1                       | 1   | 1 | 0 | 0 | 1   |
| GCA_013333595.2_ASM1333359v2                       | 0.3 | 0 | 1 | 0 | 0   |
| GCA_010202845.1_ASM1020284v1                       | 1   | 0 | 1 | 0 | 0.5 |
| GCA_010202115.1_ASM1020211v1                       | 1   | 0 | 1 | 0 | 0.5 |
| R0170300309_tooth_RAH.megahit.bin.70               | 1   | 0 | 1 | 0 | 0   |
| GCA_018127705.1_ASM1812770v1                       | 0.9 | 0 | 1 | 0 | 0   |
| R0170300279_tooth_RAH.megahit.bin.111              | 1   | 0 | 1 | 0 | 0.5 |
| GCA_017514045.1_ASM1751404v1                       | 1   | 1 | 0 | 0 | 0.5 |
| SZAXPI018174-30_RA_dental.metaspades.bin.36        | 1   | 0 | 1 | 0 | 0.5 |
| YS001160_saliva.spades.bin.8                       | 1   | 0 | 1 | 0 | 0   |
| RSZAXPI002326-41_RAH_dental.metaspades.bin.35      | 0.9 | 0 | 1 | 0 | 0   |
| RSZAXPI002673-20_RA_dental.metaspades.bin.43       | 0.9 | 0 | 1 | 0 | 0   |
| R0170300147_tooth_RA.megahit.bin.17                | 0.9 | 0 | 1 | 0 | 0.5 |
| R0170300056_tooth_RA.megahit.bin.17                | 0.8 | 0 | 1 | 0 | 0   |
| SZAXPI018278-93_RA_dental.metaspades.bin.41        | 1   | 0 | 1 | 0 | 0   |
| GCA_027356125.1_ASM2735612v1                       | 0.4 | 0 | 1 | 0 | 0   |
| GCA_015257665.1_ASM1525766v1                       | 0.6 | 0 | 1 | 0 | 0.5 |
| RSZAXPI002315-24_RAH_dental.metaspades.bin.39      | 0.9 | 0 | 1 | 0 | 0   |
| R0170300228_tooth_RA.megahit.bin.112               | 0.8 | 0 | 1 | 0 | 0   |
| RSZAXPI002330-47_RAH_dental.metaspades.bin.66      | 0.4 | 0 | 1 | 0 | 0.5 |
| R0170300128_tooth_RA.megahit.bin.9                 | 1   | 0 | 1 | 0 | 0   |
| RSZAXPI002604-26_RA_dental.metaspades.bin.36       | 0.8 | 0 | 1 | 0 | 0   |
| GCA_943354005.1_MsH-30jul19-11                     | 0.6 | 0 | 1 | 0 | 0   |
| SRR6748164.metaspades.bin.5                        | 1   | 0 | 1 | 0 | 0   |
| YS000126_saliva.spades.bin.17                      | 1   | 0 | 1 | 0 | 0   |
| SRR6748160.metaspades.bin.6                        | 1   | 0 | 1 | 0 | 0   |
| SRR6748159.metaspades.bin.19                       | 1   | 0 | 1 | 0 | 0   |
| SRR6748163.metaspades.bin.10                       | 1   | 0 | 1 | 0 | 0   |
| RDPYD18300362_A_saliva.metaspades.bin.83           | 1   | 0 | 1 | 0 | 0   |
| RSZYD18187595_A_saliva.metaspades.bin.7            | 1   | 0 | 1 | 0 | 0   |
| GCA_027428095.1_ASM2742809v1                       | 0.9 | 0 | 1 | 0 | 0.5 |
| GCA_002793725.1_ASM279372v1                        | 0.3 | 0 | 1 | 0 | 0.5 |
| GCA_001873625.1_ASM187362v1                        | 0.3 | 0 | 1 | 0 | 0.5 |
| GCA_002795915.1_ASM279591v1                        | 0.3 | 0 | 1 | 0 | 0.5 |
| GCA_002323055.1_ASM232305v1                        | 0.3 | 0 | 1 | 0 | 0.5 |
| RSZAXPI002312-21_RAH_dental.metaspades.bin.60      | 0.8 | 0 | 1 | 0 | 0   |
| GCA_027426655.1_ASM2742665v1                       | 0.6 | 0 | 1 | 0 | 0   |



|                                               |     |   |   |   |     |
|-----------------------------------------------|-----|---|---|---|-----|
| R0170300097_tooth_RA.megahit.bin.6            | 0.8 | 0 | 1 | 0 | 0   |
| YS000462_saliva.spades.bin.8                  | 1   | 0 | 1 | 0 | 0   |
| R0170300284_tooth_RAH.megahit.bin.10          | 0.8 | 0 | 1 | 0 | 0   |
| R0170300288_tooth_RAH.megahit.bin.34          | 0.8 | 0 | 1 | 0 | 0   |
| SZAXPI018180-36_RA_dental.metaspades.bin.18   | 0.8 | 0 | 1 | 0 | 0   |
| R0170300194_tooth_RA.megahit.bin.111          | 0.9 | 0 | 1 | 0 | 0.5 |
| R0170300097_tooth_RA.megahit.bin.57           | 1   | 0 | 1 | 0 | 0.5 |
| GCA_013815775.1_ASM1381577v1                  | 0.4 | 0 | 1 | 1 | 0   |
| SZAXPI018302-84_RA_dental.metaspades.bin.17   | 0.9 | 0 | 1 | 0 | 0.5 |
| GCA_027426695.1_ASM2742669v1                  | 0.6 | 0 | 1 | 0 | 0   |
| RSZAXPI002325-39_RAH_dental.metaspades.bin.45 | 0.8 | 0 | 1 | 0 | 0   |
| R0170300321_tooth_RAH.megahit.bin.21          | 0.8 | 0 | 1 | 0 | 0   |
| R0170300219_tooth_RA.megahit.bin.79           | 0.9 | 0 | 1 | 0 | 0.5 |
| SRR6748161.metaspades.bin.16                  | 1   | 0 | 1 | 0 | 0   |
| R0170300268_tooth_RAH.megahit.bin.13          | 0.9 | 0 | 1 | 0 | 0   |
| GCA_027427755.1_ASM2742775v1                  | 0.4 | 0 | 1 | 1 | 0   |
| SZAXPI018092-13_RA_dental.metaspades.bin.42   | 0.9 | 0 | 1 | 0 | 0.5 |
| RSZAXPI002633-90_RA_dental.metaspades.bin.49  | 0.9 | 0 | 1 | 0 | 0.5 |
| RSZAXPI002636-95_RA_dental.metaspades.bin.12  | 0.9 | 0 | 1 | 0 | 0.5 |
| R0170300203_tooth_RA.megahit.bin.96           | 0.8 | 0 | 1 | 0 | 0   |
| RSZAXPI002326-41_RAH_dental.metaspades.bin.6  | 0.8 | 0 | 1 | 0 | 0   |
| GCA_002482925.1_ASM248292v1                   | 0.6 | 0 | 1 | 0 | 0   |
| RSZYD18078214_A_saliva.metaspades.bin.42      | 1   | 0 | 1 | 0 | 0   |
| GCA_013333625.2_ASM1333362v2                  | 0.9 | 0 | 1 | 0 | 0.5 |
| GCA_027365795.1_ASM2736579v1                  | 0.6 | 0 | 1 | 1 | 0   |
| GCA_007135955.1_ASM713595v1                   | 0.6 | 0 | 1 | 0 | 0   |
| GCA_013333055.2_ASM1333305v2                  | 0.8 | 0 | 1 | 0 | 0   |
| GCA_007845485.1_ASM784548v1                   | 0.8 | 0 | 1 | 0 | 0   |
| SZAXPI018279-94_RA_dental.metaspades.bin.46   | 0.8 | 0 | 1 | 0 | 0   |
| R0170300285_tooth_RAH.megahit.bin.89          | 0.8 | 0 | 1 | 0 | 0   |
| SZAXPI018171-25_1_RA_dental.metaspades.bin.23 | 0.8 | 0 | 1 | 0 | 0   |
| YS001069_saliva.spades.bin.6                  | 1   | 0 | 1 | 0 | 0   |
| GCA_010202465.1_ASM1020246v1                  | 1   | 0 | 1 | 0 | 0.5 |
| RDPYD18300164_A_saliva.metaspades.bin.23      | 1   | 0 | 1 | 0 | 0   |
| RSZAXPI002460-93_RAH_saliva.metaspades.bin.2  | 1   | 0 | 1 | 0 | 0   |
| GCA_017404845.1_ASM1740484v1                  | 1   | 0 | 0 | 0 | 0.5 |
| SZAXPI018292-158_RA_dental.metaspades.bin.62  | 0.9 | 0 | 1 | 0 | 0.5 |
| SZAXPI018315-17_RA_dental.metaspades.bin.58   | 0.8 | 0 | 1 | 0 | 0   |
| R0170300219_tooth_RA.megahit.bin.19           | 0.9 | 0 | 1 | 0 | 0   |
| R0170300269_tooth_RAH.megahit.bin.68          | 0.9 | 0 | 1 | 0 | 0   |
| R0170300127_tooth_RA.megahit.bin.43           | 0.8 | 0 | 1 | 0 | 0   |
| RSZYD18078660_A_saliva.metaspades.bin.67      | 1   | 0 | 1 | 0 | 0   |
| RDPYD18300059_A_saliva.metaspades.bin.13      | 0.4 | 0 | 1 | 0 | 0.5 |
| RSZYD18078615_A_saliva.metaspades.bin.45      | 1   | 0 | 1 | 0 | 0   |
| RSZYD18187612_A_saliva.metaspades.bin.12      | 1   | 0 | 1 | 0 | 0   |
| SZAXPI018288-133_RA_dental.metaspades.bin.36  | 0.8 | 0 | 1 | 0 | 0   |
| RSZAXPI002316-25_RAH_dental.metaspades.bin.44 | 0.8 | 0 | 1 | 0 | 0   |
| R0170300287_tooth_RAH.megahit.bin.130         | 0.8 | 0 | 1 | 0 | 0.5 |
| RSZYD18187034_A_saliva.metaspades.bin.52      | 1   | 0 | 1 | 0 | 0   |
| GCA_005697395.1_ASM569739v1                   | 1   | 0 | 1 | 0 | 0   |
| GCA_000803625.1_ASM80362v1                    | 1   | 0 | 1 | 0 | 0   |
| GCA_019662065.1_ASM1966206v1                  | 0.4 | 0 | 1 | 1 | 0   |
| GCA_905372195.1_SRR9217401-mag-bin.1          | 0.9 | 0 | 1 | 0 | 0.5 |
| R0170300308_tooth_RAH.megahit.bin.44          | 0.9 | 0 | 1 | 0 | 0.5 |
| YS000206_saliva.spades.bin.3                  | 1   | 0 | 1 | 0 | 0   |
| SZAXPI018173-27_RA_dental.metaspades.bin.20   | 0.8 | 0 | 1 | 0 | 0   |
| YS000207_saliva.spades.bin.17                 | 0.8 | 0 | 1 | 0 | 0   |
| RSZYD18187596_A_saliva.metaspades.bin.23      | 0.8 | 0 | 1 | 0 | 0   |
| R0170300114_tooth_RA.megahit.bin.70           | 0.8 | 0 | 1 | 0 | 0   |
| R0170300194_tooth_RA.megahit.bin.127          | 0.9 | 0 | 1 | 0 | 0   |
| GCA_943914775.1_Tcv98XDF6C_bin.50.MAG         | 0.9 | 0 | 1 | 0 | 0.5 |
| R0170300267_tooth_RAH.megahit.bin.37          | 0.9 | 0 | 1 | 0 | 0.5 |
| RSZAXPI002326-41_RAH_dental.metaspades.bin.24 | 0.9 | 0 | 1 | 0 | 0.5 |
| RSZYD18078228_A_saliva.metaspades.bin.31      | 1   | 0 | 1 | 0 | 0   |
| RSZYD18187676_A_saliva.metaspades.bin.32      | 1   | 0 | 1 | 0 | 0   |
| GCA_017480095.1_ASM1748009v1                  | 1   | 1 | 0 | 0 | 1   |
| RDPYD18098853_A_saliva.metaspades.bin.65      | 1   | 0 | 1 | 0 | 0   |
| YS000202_saliva.spades.bin.16                 | 1   | 0 | 1 | 0 | 0   |
| SZAXPI018287-129_RA_dental.metaspades.bin.24  | 0.6 | 0 | 1 | 0 | 0.5 |
| RSZAXPI002603-21_RA_dental.metaspades.bin.27  | 1   | 0 | 1 | 0 | 0   |
| R0170300051_tooth_RA.megahit.bin.71           | 0.8 | 0 | 1 | 0 | 0   |
| R0170300120_tooth_RA.megahit.bin.106          | 0.8 | 0 | 1 | 0 | 0   |
| GCA_900555265.1_UMGS1805                      | 1   | 0 | 1 | 0 | 0   |
| GCA_017514865.1_ASM1751486v1                  | 1   | 1 | 0 | 0 | 0.5 |
| SZAXPI018101-22_RA_dental.metaspades.bin.26   | 0.9 | 0 | 1 | 0 | 0.5 |
| RSZAXPI002617-32_RA_dental.metaspades.bin.17  | 1   | 0 | 1 | 0 | 0   |
| YS001090_saliva.spades.bin.11                 | 1   | 0 | 1 | 0 | 0   |
| R0170300119_tooth_RA.megahit.bin.84           | 1   | 0 | 1 | 0 | 0.5 |

|                                                         |     |   |   |   |     |
|---------------------------------------------------------|-----|---|---|---|-----|
| RSZYD18187707_A_saliva.metaspades.bin.26                | 1   | 0 | 1 | 0 | 0   |
| RDPYD18300305_A_saliva.metaspades.bin.9                 | 1   | 0 | 1 | 0 | 0   |
| RSZYD18078769_A_saliva.metaspades.bin.23                | 1   | 0 | 1 | 0 | 0   |
| SZAXPI018275-88_RA_dental.metaspades.bin.38             | 0.9 | 0 | 1 | 0 | 0   |
| R0170300269_tooth_RAH.megahit.bin.4                     | 0.8 | 0 | 1 | 0 | 0   |
| RSZAXPI002324-37_RA_dental.metaspades.bin.42            | 1   | 0 | 1 | 0 | 0   |
| SRR8114096.metaspades.bin.1                             | 1   | 0 | 1 | 0 | 0   |
| YS000066_saliva.spades.bin.24                           | 1   | 0 | 1 | 0 | 0   |
| R0170300066_tooth_RA.megahit.bin.70                     | 0.8 | 0 | 1 | 0 | 0   |
| GCA_025349965.1_ASM2534996v1                            | 0.6 | 0 | 1 | 0 | 0   |
| R0170300247_tooth_RAH.megahit.bin.77                    | 0.8 | 0 | 1 | 0 | 0   |
| GCA_017457925.1_ASM1745792v1                            | 1   | 1 | 0 | 0 | 1   |
| R0170300320_tooth_RAH.megahit.bin.4                     | 0.8 | 0 | 1 | 0 | 0   |
| R0170300165_tooth_RA.megahit.bin.12                     | 0.8 | 0 | 1 | 0 | 0   |
| R0170300218_tooth_RA.megahit.bin.65                     | 0.8 | 0 | 1 | 0 | 0   |
| GCA_027334585.1_ASM2733458v1                            | 0.6 | 0 | 1 | 1 | 0   |
| RSZAXPI002609-25_RA_dental.metaspades.bin.20            | 0.6 | 0 | 1 | 0 | 0.5 |
| R0170300062_tooth_RA.megahit.bin.66                     | 1   | 0 | 1 | 0 | 0   |
| YS000236_saliva.spades.bin.20                           | 1   | 0 | 1 | 0 | 0   |
| RSZYD18078359_A_saliva.metaspades.bin.14                | 1   | 0 | 1 | 0 | 0   |
| RSZAXPI002471-106_2_RA_dental.metaspades.bin.25         | 1   | 0 | 1 | 0 | 0   |
| YS001052_saliva.spades.bin.13                           | 1   | 0 | 1 | 0 | 0   |
| YS001127_saliva.spades.bin.3                            | 1   | 0 | 1 | 0 | 0   |
| RDPYD18099034_A_saliva.metaspades.bin.21                | 1   | 0 | 1 | 0 | 0   |
| GCA_905372095.1_SRR9217394-mag-bin.2                    | 0.9 | 0 | 1 | 0 | 0.5 |
| RDPYD18201791_A_saliva.metaspades.bin.40                | 0.8 | 0 | 1 | 0 | 0   |
| RSZYD18187631_A_saliva.metaspades.bin.12                | 0.8 | 0 | 1 | 0 | 0   |
| RDPYD18098469_A_saliva.metaspades.bin.33                | 1   | 0 | 1 | 0 | 0   |
| GCA_013333815.2_ASM1333381v2                            | 0.8 | 0 | 1 | 0 | 0   |
| GCA_013394755.1_ASM1339475v1                            | 1   | 0 | 1 | 0 | 0.5 |
| GCA_013100845.1_ASM1310084v1                            | 1   | 0 | 1 | 0 | 0.5 |
| GCA_903946795.1_freshwater_MAG_---_Loc090907-4m_bin-620 | 0.6 | 0 | 1 | 0 | 0   |
| R0170300136_tooth_RA.megahit.bin.13                     | 0.9 | 0 | 1 | 0 | 0   |
| YS000926_saliva.spades.bin.2                            | 1   | 0 | 1 | 0 | 0   |
| R0170300106_tooth_RA.megahit.bin.47                     | 0.9 | 0 | 1 | 0 | 0.5 |
| YS000915_saliva.spades.bin.1                            | 1   | 0 | 1 | 0 | 0   |
| YS000367_saliva.spades.bin.21                           | 1   | 0 | 1 | 0 | 0   |
| SRR8114041.metaspades.bin.6                             | 1   | 0 | 1 | 0 | 0   |
| RDPYD18098889_A_saliva.metaspades.bin.45                | 0.8 | 0 | 1 | 0 | 0   |
| SRR6748184.metaspades.bin.16                            | 1   | 0 | 1 | 0 | 0   |
| SRR6748185.metaspades.bin.21                            | 1   | 0 | 1 | 0 | 0   |
| RSZYD18078639_A_saliva.metaspades.bin.14                | 1   | 0 | 1 | 0 | 0   |
| RSZYD18078454_A_saliva.metaspades.bin.52                | 1   | 0 | 1 | 0 | 0   |
| R0170300311_tooth_RAH.megahit.bin.11                    | 0.9 | 0 | 1 | 0 | 0   |
| RSZAXPI002657-17_RA_dental.metaspades.bin.27            | 0.9 | 0 | 1 | 0 | 0   |
| RSZYD18078262_A_saliva.metaspades.bin.27                | 1   | 0 | 1 | 0 | 0   |
| GCA_900757685.1_ERS537356_50                            | 1   | 0 | 1 | 0 | 0   |
| RSZAXPI002477-142_2_RA_dental.metaspades.bin.82         | 1   | 0 | 1 | 0 | 0   |
| RSZAXPI002325-39_RA_dental.metaspades.bin.11            | 0.9 | 0 | 1 | 0 | 0.5 |
| YS000361_saliva.spades.bin.9                            | 1   | 0 | 1 | 0 | 0   |
| YS000411_saliva.spades.bin.13                           | 1   | 0 | 1 | 0 | 0   |
| GCA_918593335.1_timonensis                              | 1   | 0 | 1 | 0 | 0   |
| GCA_904425485.1_PRJEB35131-2                            | 1   | 0 | 1 | 0 | 0   |
| RDPYD18189830_A_saliva.metaspades.bin.63                | 1   | 0 | 1 | 0 | 0   |
| RDPYD18099004_A_saliva.metaspades.bin.53                | 1   | 0 | 1 | 0 | 0   |
| R0170300098_tooth_RA.megahit.bin.129                    | 0.9 | 0 | 1 | 0 | 0   |
| GCA_009994745.1_ASM999474v1                             | 0.3 | 0 | 1 | 0 | 0.5 |
| R0170300302_tooth_RAH.megahit.bin.78                    | 0.6 | 0 | 1 | 0 | 0.5 |
| GCA_002381485.1_ASM238148v1                             | 0.6 | 0 | 1 | 0 | 0.5 |
| SZAXPI018098-19_RA_dental.metaspades.bin.53             | 1   | 0 | 1 | 0 | 0   |
| SZAXPI018093-14_RA_dental.metaspades.bin.39             | 0.8 | 0 | 1 | 0 | 0   |
| RSZYD18078241_A_saliva.metaspades.bin.8                 | 1   | 0 | 1 | 0 | 0   |
| GCA_947097585.1_SRR8786264_bin.12_metaWRAP_v1.3_MAG     | 0.9 | 0 | 1 | 0 | 0.5 |
| GCA_022828245.1_ASM2282824v1                            | 1   | 0 | 1 | 0 | 0   |
| RDPYD18088985_A_saliva.metaspades.bin.11                | 1   | 0 | 1 | 0 | 0   |
| R0170300302_tooth_RAH.megahit.bin.125                   | 1   | 0 | 1 | 0 | 0.5 |
| RSZAXPI002332-57_RA_dental.metaspades.bin.16            | 0.9 | 0 | 1 | 0 | 0   |
| RSZYD18187801_A_saliva.metaspades.bin.75                | 0.9 | 0 | 1 | 0 | 0.5 |
| RDPYD18075172_A_saliva.metaspades.bin.27                | 1   | 0 | 1 | 0 | 0   |
| R0170300289_tooth_RAH.megahit.bin.75                    | 1   | 0 | 1 | 0 | 0   |
| RSZAXPI002482-15_2_RA_dental.metaspades.bin.8           | 1   | 0 | 1 | 0 | 0   |
| RSZAXPI002454-50_RA_dental.metaspades.bin.3             | 0.8 | 0 | 1 | 0 | 0   |
| YS000205_saliva.spades.bin.1                            | 1   | 0 | 1 | 0 | 0   |
| RSZYD18187907_A_saliva.metaspades.bin.32                | 1   | 0 | 1 | 0 | 0   |
| RSZYD18187586_A_saliva.metaspades.bin.38                | 1   | 0 | 1 | 0 | 0   |
| R0170300221_tooth_RA.megahit.bin.19                     | 0.9 | 0 | 1 | 0 | 0   |
| YS000259_saliva.spades.bin.23                           | 1   | 0 | 1 | 0 | 0   |
| YS000216_saliva.spades.bin.15                           | 1   | 0 | 1 | 0 | 0   |

|                                                            |     |   |   |   |     |
|------------------------------------------------------------|-----|---|---|---|-----|
| RSZAXPI002470-105_RAH_saliva.metaspades.bin.14             | 1   | 0 | 1 | 0 | 0   |
| RSZYD18078609_A_saliva.metaspades.bin.12                   | 1   | 0 | 1 | 0 | 0   |
| RSZYD18078217_A_saliva.metaspades.bin.41                   | 1   | 0 | 1 | 0 | 0   |
| R0170300253_tooth_RAH.megahit.bin.118                      | 0.8 | 0 | 1 | 0 | 0   |
| R0170300229_tooth_RA.megahit.bin.46                        | 0.8 | 0 | 1 | 0 | 0   |
| R0170300303_tooth_RAH.megahit.bin.144                      | 0.8 | 0 | 1 | 0 | 0   |
| SZAXPI018190-56_RA_dental.metaspades.bin.44                | 0.5 | 0 | 1 | 0 | 0   |
| R0170300100_tooth_RA.megahit.bin.115                       | 1   | 0 | 1 | 0 | 0   |
| SZAXPI018277-90_RA_dental.metaspades.bin.26                | 0.8 | 0 | 1 | 0 | 0   |
| RSZAXPI002316-25_RAH_dental.metaspades.bin.41              | 0.5 | 0 | 1 | 0 | 0   |
| RSZAXPI002613-24_RA_dental.metaspades.bin.37               | 1   | 0 | 1 | 0 | 0.5 |
| YS000587_saliva.spades.bin.10                              | 1   | 0 | 1 | 0 | 0   |
| RDPYD18300227_A_saliva.metaspades.bin.33                   | 0.8 | 0 | 1 | 0 | 0   |
| R0170300052_tooth_RA.megahit.bin.29                        | 0.8 | 0 | 1 | 0 | 0   |
| RSZAXPI002459-90_RAH_dental.metaspades.bin.59              | 0.8 | 0 | 1 | 0 | 0   |
| R0170300251_tooth_RAH.megahit.bin.7                        | 1   | 0 | 1 | 0 | 0.5 |
| SZAXPI018291-142_RA_dental.metaspades.bin.25               | 0.8 | 0 | 1 | 0 | 0   |
| RDPYD18097648_A_saliva.metaspades.bin.17                   | 1   | 0 | 1 | 0 | 0   |
| GCA_017460305.1_ASM1746030v1                               | 0.8 | 1 | 0 | 0 | 1   |
| RSZAXPI002636-95_RA_dental.metaspades.bin.22               | 1   | 0 | 1 | 0 | 0.5 |
| R0170300102_tooth_RA.megahit.bin.26                        | 1   | 0 | 1 | 0 | 0.5 |
| RSZYD18078076_A_saliva.metaspades.bin.41                   | 1   | 0 | 1 | 0 | 0   |
| RSZYD18187852_A_saliva.metaspades.bin.38                   | 1   | 0 | 1 | 0 | 0   |
| R0170300187_tooth_RA.megahit.bin.57                        | 0.8 | 0 | 1 | 0 | 0   |
| YS000209_saliva.spades.bin.15                              | 1   | 0 | 1 | 0 | 0   |
| SZAXPI018322-24_RA_dental.metaspades.bin.44                | 0.9 | 0 | 1 | 0 | 0   |
| RSZAXPI002455-75_RAH_dental.metaspades.bin.33              | 0.8 | 0 | 1 | 0 | 0   |
| RSZYD18078703_A_saliva.metaspades.bin.8                    | 1   | 0 | 1 | 0 | 0   |
| RSZYD18078202_A_saliva.metaspades.bin.4                    | 1   | 0 | 1 | 0 | 0   |
| SZAXPI018283-109_RA_dental.metaspades.bin.24               | 1   | 0 | 1 | 0 | 0   |
| R0170300242_tooth_RAH.megahit.bin.82                       | 0.8 | 0 | 1 | 0 | 0   |
| RSZAXPI002308-17_RAH_dental.metaspades.bin.47              | 0.8 | 0 | 1 | 0 | 0   |
| RSZAXPI002322-34_RAH_dental.metaspades.bin.14              | 0.8 | 0 | 1 | 0 | 0   |
| RSZAXPI002460-93_2_RAH_saliva.metaspades.bin.17            | 1   | 0 | 1 | 0 | 0   |
| RDPYD18189957_A_saliva.metaspades.bin.89                   | 1   | 0 | 1 | 0 | 0   |
| SZAXPI018177-33_RA_dental.metaspades.bin.61                | 1   | 0 | 1 | 0 | 0.5 |
| RSZYD18078741_A_saliva.metaspades.bin.48                   | 1   | 0 | 1 | 0 | 0   |
| GCA_017437945.1_ASM1743794v1                               | 1   | 1 | 0 | 0 | 1   |
| GCA_024682595.1_ASM2468259v1                               | 1   | 1 | 0 | 0 | 1   |
| R0170300196_tooth_RA.megahit.bin.46                        | 0.5 | 0 | 1 | 0 | 0.5 |
| GCA_009992235.1_ASM999223v1                                | 0.4 | 0 | 1 | 0 | 0.5 |
| SZAXPI018092-13_RA_dental.metaspades.bin.61                | 1   | 0 | 1 | 0 | 0   |
| YS000438_saliva.spades.bin.9                               | 1   | 0 | 1 | 0 | 0   |
| RDPYD18088830_A_saliva.metaspades.bin.38                   | 1   | 0 | 1 | 0 | 0   |
| RSZYD18078400_A_saliva.metaspades.bin.68                   | 1   | 0 | 1 | 0 | 0   |
| RSZYD18078343_A_saliva.metaspades.bin.21                   | 1   | 0 | 1 | 0 | 0   |
| R0170300120_tooth_RA.megahit.bin.28                        | 0.6 | 0 | 1 | 0 | 0.5 |
| RSZYD18187344_A_saliva.metaspades.bin.34                   | 1   | 0 | 1 | 0 | 0   |
| YS000034_saliva.spades.bin.2                               | 1   | 0 | 1 | 0 | 0   |
| RSZYD18078125_A_saliva.metaspades.bin.19                   | 1   | 0 | 1 | 0 | 0   |
| RSZYD18187514_A_saliva.metaspades.bin.23                   | 1   | 0 | 1 | 0 | 0   |
| RSZYD18187110_A_saliva.metaspades.bin.14                   | 1   | 0 | 1 | 0 | 0   |
| YS000360_saliva.spades.bin.8                               | 1   | 0 | 1 | 0 | 0   |
| RDPYD18097660_A_saliva.metaspades.bin.29                   | 1   | 0 | 1 | 0 | 0   |
| RSZYD18187762_A_saliva.metaspades.bin.45                   | 1   | 0 | 1 | 0 | 0   |
| RSZYD18187760_A_saliva.metaspades.bin.26                   | 1   | 0 | 1 | 0 | 0   |
| GCA_017552385.1_ASM1755238v1                               | 0.8 | 1 | 0 | 0 | 0.5 |
| GCA_020428435.1_ASM2042843v1                               | 0.7 | 0 | 1 | 0 | 0   |
| R0170300145_tooth_RA.megahit.bin.44                        | 0.8 | 0 | 1 | 0 | 0   |
| R0170300092_tooth_RA.megahit.bin.69                        | 1   | 0 | 1 | 0 | 0.5 |
| GCA_903832815.1_freshwater_MAG_---_AM-lipid-01-D1_bin-110  | 0.6 | 0 | 1 | 1 | 0   |
| GCA_903821315.1_freshwater_MAG_---_AM-lipid-01-D2_bin-004  | 0.6 | 0 | 1 | 1 | 0   |
| GCA_903831735.1_freshwater_MAG_---_AlinenLipids_bin-2074   | 0.6 | 0 | 1 | 1 | 0   |
| GCA_903859365.1_freshwater_MAG_---_AM-lipid-02-D3_bin-0353 | 0.6 | 0 | 1 | 1 | 0   |
| GCA_021404905.1_ASM2140490v1                               | 0.8 | 0 | 1 | 0 | 0   |
| RDPYD18201644_A_saliva.metaspades.bin.16                   | 1   | 0 | 1 | 0 | 0   |
| RSZYD18187591_A_saliva.metaspades.bin.33                   | 1   | 0 | 1 | 0 | 0   |
| RSZYD18078695_A_saliva.metaspades.bin.45                   | 1   | 0 | 1 | 0 | 0   |
| GCA_905370345.1_DRR046104-mag-bin.8                        | 1   | 0 | 1 | 0 | 0   |
| YS000324_saliva.spades.bin.7                               | 1   | 0 | 1 | 0 | 0   |
| RSZYD18078691_A_saliva.metaspades.bin.32                   | 1   | 0 | 1 | 0 | 0   |
| R0170300146_tooth_RA.megahit.bin.4                         | 0.8 | 0 | 1 | 0 | 0   |
| R0170300144_tooth_RA.megahit.bin.121                       | 0.8 | 0 | 1 | 0 | 0   |
| RSZAXPI002620-35_RA_dental.metaspades.bin.12               | 0.8 | 0 | 1 | 0 | 0.5 |
| RSZYD18078134_A_saliva.metaspades.bin.52                   | 1   | 0 | 1 | 0 | 0   |
| RSZYD18078181_A_saliva.metaspades.bin.10                   | 1   | 0 | 1 | 0 | 0   |
| GCA_002788895.1_ASM278889v1                                | 0.3 | 0 | 1 | 0 | 0.5 |
| GCA_013099015.1_ASM1309901v1                               | 1   | 0 | 1 | 0 | 0.5 |



|                                                      |     |   |   |   |     |
|------------------------------------------------------|-----|---|---|---|-----|
| SZAXPI018309-166_RA_dental.metaspades.bin.21         | 0.9 | 0 | 1 | 0 | 0   |
| R0170300271_tooth_RAH.megahit.bin.21                 | 0.8 | 0 | 1 | 0 | 0   |
| RDPYD18099019_A_saliva.metaspades.bin.28             | 1   | 0 | 1 | 0 | 0   |
| RSZAXPI002637-96_RA_dental.metaspades.bin.23         | 0.8 | 0 | 1 | 0 | 0   |
| R0170300291_tooth_RAH.megahit.bin.75                 | 0.8 | 0 | 1 | 0 | 0   |
| SZAXPI018392-31_RA_saliva.metaspades.bin.11          | 1   | 0 | 1 | 0 | 0   |
| GCA_002421965.1_ASM242196v1                          | 1   | 0 | 1 | 0 | 0   |
| RSZAXPI002469-104_2_RAH_saliva.metaspades.bin.11     | 1   | 0 | 1 | 0 | 0   |
| RSZYD18187234_A_saliva.metaspades.bin.73             | 1   | 0 | 1 | 0 | 0   |
| R0170300252_tooth_RAH.megahit.bin.31                 | 0.8 | 0 | 1 | 0 | 0   |
| GCA_017536895.1_ASM1753689v1                         | 1   | 1 | 0 | 0 | 1   |
| R0170300151_tooth_RA.megahit.bin.58                  | 0.9 | 0 | 1 | 0 | 0.5 |
| RSZAXPI002617-32_RA_dental.metaspades.bin.20         | 0.8 | 0 | 1 | 0 | 0   |
| R0170300156_tooth_RA.megahit.bin.76                  | 0.8 | 0 | 1 | 0 | 0   |
| RSZYD18078725_A_saliva.metaspades.bin.23             | 1   | 0 | 1 | 0 | 0   |
| RDPYD18300150_A_saliva.metaspades.bin.6              | 1   | 0 | 1 | 0 | 0   |
| SZAXPI018191-57_RA_dental.metaspades.bin.69          | 0.8 | 0 | 1 | 0 | 0   |
| RSZYD18078673_A_saliva.metaspades.bin.3              | 1   | 0 | 1 | 0 | 0   |
| RSZYD18187520_A_saliva.metaspades.bin.22             | 1   | 0 | 1 | 0 | 0   |
| GCA_017941835.1_ASM1794183v1                         | 0.8 | 1 | 0 | 0 | 1   |
| R0170300301_tooth_RAH.megahit.bin.99                 | 0.9 | 0 | 1 | 0 | 0   |
| YS000456_saliva.spades.bin.18                        | 1   | 0 | 1 | 0 | 0   |
| YS000546_saliva.spades.bin.3                         | 1   | 0 | 1 | 0 | 0   |
| RDPYD18201832_A_saliva.metaspades.bin.52             | 1   | 0 | 1 | 0 | 0   |
| RSZYD18187400_A_saliva.metaspades.bin.89             | 0.9 | 0 | 1 | 0 | 0.5 |
| R0170300151_tooth_RA.megahit.bin.21                  | 0.8 | 0 | 1 | 0 | 0   |
| R0170300147_tooth_RA.megahit.bin.4                   | 0.6 | 0 | 1 | 0 | 0.5 |
| R0170300077_tooth_RA.megahit.bin.6                   | 0.8 | 0 | 1 | 0 | 0   |
| GCA_017406405.1_ASM1740640v1                         | 0.8 | 1 | 0 | 0 | 0.5 |
| RSZYD18187120_A_saliva.metaspades.bin.19             | 1   | 0 | 0 | 0 | 1   |
| R0170300189_tooth_RA.megahit.bin.1                   | 0.6 | 0 | 1 | 0 | 0.5 |
| R0170300219_tooth_RA.megahit.bin.2                   | 0.8 | 0 | 1 | 0 | 0   |
| GCA_027326965.1_ASM2732696v1                         | 0.6 | 0 | 1 | 1 | 0   |
| RSZYD18187216_A_saliva.metaspades.bin.102            | 1   | 0 | 1 | 0 | 0   |
| GCA_020428105.1_ASM2042810v1                         | 0.6 | 0 | 1 | 1 | 0   |
| R0170300110_tooth_RA.megahit.bin.64                  | 0.8 | 0 | 1 | 0 | 0   |
| YS000073_saliva.spades.bin.20                        | 1   | 0 | 0 | 0 | 0   |
| GCA_004138385.1_ASM413838v1                          | 0.9 | 0 | 1 | 0 | 0.5 |
| RSZYD18078161_A_saliva.metaspades.bin.1              | 0.8 | 0 | 1 | 0 | 0   |
| R0170300137_tooth_RA.megahit.bin.10                  | 0.8 | 0 | 1 | 0 | 0   |
| GCA_017515105.1_ASM1751510v1                         | 1   | 1 | 0 | 0 | 1   |
| RDPYD18189867_A_saliva.metaspades.bin.12             | 1   | 0 | 1 | 0 | 0   |
| GCA_027492535.1_ASM2749253v1                         | 0.7 | 0 | 1 | 0 | 0   |
| R0170300104_tooth_RA.megahit.bin.11                  | 0.4 | 0 | 1 | 0 | 0.5 |
| RDPYD18189925_A_saliva.metaspades.bin.14             | 1   | 0 | 1 | 0 | 0   |
| GCA_022819385.1_ASM2281938v1                         | 1   | 0 | 1 | 0 | 0   |
| RDPYD18300017_A_saliva.metaspades.bin.20             | 1   | 0 | 1 | 0 | 0   |
| GCA_022828325.1_ASM2282832v1                         | 1   | 0 | 1 | 0 | 0   |
| GCA_004138395.1_ASM413839v1                          | 1   | 1 | 0 | 0 | 1   |
| YS000918_saliva.spades.bin.33                        | 1   | 0 | 1 | 0 | 0   |
| RSZYD18078490_A_saliva.metaspades.bin.38             | 1   | 0 | 1 | 0 | 0   |
| RDPYD18189874_A_saliva.metaspades.bin.36             | 1   | 0 | 1 | 0 | 0   |
| YS000305_saliva.spades.bin.4                         | 1   | 0 | 1 | 0 | 0   |
| RDPYD18300036_A_saliva.metaspades.bin.65             | 1   | 0 | 1 | 0 | 0   |
| RSZYD18187166_A_saliva.metaspades.bin.15             | 1   | 0 | 1 | 0 | 0   |
| YS000651_saliva.spades.bin.17                        | 1   | 0 | 1 | 0 | 0   |
| SZAXPI018280-95_RA_dental.metaspades.bin.36          | 0.9 | 0 | 1 | 0 | 0.5 |
| R0170300213_tooth_RA.megahit.bin.30                  | 0.9 | 0 | 1 | 0 | 0.5 |
| RSZAXPI002311-20_RAH_dental.metaspades.bin.69        | 0.8 | 0 | 1 | 0 | 0   |
| RSZAXPI002620-35_RA_dental.metaspades.bin.1          | 1   | 0 | 1 | 0 | 0   |
| R0170300321_tooth_RAH.megahit.bin.33                 | 0.9 | 0 | 1 | 0 | 0.5 |
| R0170300257_tooth_RAH.megahit.bin.65                 | 0.9 | 0 | 1 | 0 | 0   |
| R0170300197_tooth_RA.megahit.bin.71                  | 1   | 0 | 1 | 0 | 0   |
| RSZYD18078593_A_saliva.metaspades.bin.35             | 1   | 0 | 1 | 0 | 0   |
| R0170300240_tooth_RAH.megahit.bin.61                 | 0.8 | 0 | 1 | 0 | 0   |
| R0170300107_tooth_RA.megahit.bin.2                   | 0.8 | 0 | 1 | 0 | 0.5 |
| RSZAXPI002636-95_RA_dental.metaspades.bin.30         | 0.6 | 0 | 1 | 0 | 0   |
| YS000275_saliva.spades.bin.17                        | 0.9 | 0 | 1 | 0 | 0   |
| R0170300178_tooth_RA.megahit.bin.65                  | 0.9 | 0 | 1 | 0 | 0   |
| RSZYD18187773_A_saliva.metaspades.bin.68             | 1   | 0 | 1 | 0 | 0   |
| RSZYD18078212_A_saliva.metaspades.bin.24             | 0.7 | 0 | 1 | 0 | 0   |
| GCA_946406315.1_SRR12081301_bin.45_metaWRAP_v1.3_MAG | 1   | 0 | 0 | 0 | 1   |
| RSZYD18078466_A_saliva.metaspades.bin.3              | 1   | 0 | 1 | 0 | 0   |
| R0170300297_tooth_RAH.megahit.bin.78                 | 0.8 | 0 | 1 | 0 | 0   |
| SZAXPI018189-47_RA_dental.metaspades.bin.68          | 0.8 | 0 | 1 | 0 | 0   |
| RDPYD18098770_A_saliva.metaspades.bin.53             | 1   | 0 | 1 | 0 | 0   |
| YS000142_saliva.spades.bin.13                        | 1   | 0 | 1 | 0 | 0   |
| RSZYD18187920_A_saliva.metaspades.bin.29             | 1   | 0 | 1 | 0 | 0   |

|                                                         |     |   |   |   |     |
|---------------------------------------------------------|-----|---|---|---|-----|
| RSZYD18078307_A_saliva.metaspades.bin.33                | 1   | 0 | 1 | 0 | 0   |
| SZAXPI018101-22_RA_dental.metaspades.bin.22             | 0.8 | 0 | 1 | 0 | 0   |
| RSZAXPI002653-13_RA_saliva.metaspades.bin.41            | 0.6 | 0 | 1 | 0 | 0.5 |
| GCA_947303945.1_SRR10912540_bin.27_metaWRAP_v1.3_MAG    | 1   | 0 | 0 | 0 | 1   |
| RSZYD18187715_A_saliva.metaspades.bin.33                | 1   | 0 | 1 | 0 | 0   |
| YS000678_saliva.spades.bin.12                           | 1   | 0 | 1 | 0 | 0   |
| GCA_022736555.1_ASM2273655v1                            | 0.4 | 0 | 1 | 0 | 0.5 |
| GCA_027426675.1_ASM2742667v1                            | 0.6 | 0 | 1 | 0 | 0   |
| GCA_027426815.1_ASM2742681v1                            | 0.5 | 0 | 1 | 1 | 0.5 |
| ERR2764806.metaspades.bin.18                            | 1   | 0 | 1 | 0 | 0   |
| R0170300221_tooth_RA.megahit.bin.10                     | 0.8 | 0 | 1 | 0 | 0   |
| RDPYD18300101_A_saliva.metaspades.bin.29                | 1   | 0 | 1 | 0 | 0   |
| GCA_946408595.1_SRR12081297_bin.13_metaWRAP_v1.3_MAG    | 1   | 1 | 0 | 0 | 1   |
| RDPYD18189932_A_saliva.metaspades.bin.10                | 1   | 0 | 1 | 0 | 0   |
| RSZYD18078015_A_saliva.metaspades.bin.19                | 1   | 0 | 1 | 0 | 0   |
| R0170300293_tooth_RAH.megahit.bin.118                   | 0.8 | 0 | 1 | 0 | 0   |
| RDPYD18189914_A_saliva.metaspades.bin.11                | 1   | 0 | 1 | 0 | 0   |
| RSZAXPI002650-142_RA_saliva.metaspades.bin.28           | 0.6 | 0 | 1 | 0 | 0.5 |
| RSZAXPI002458-89_RAH_dental.metaspades.bin.11           | 0.8 | 0 | 1 | 0 | 0   |
| GCA_946409605.1_SRR12081300_bin.39_metaWRAP_v1.3_MAG    | 1   | 1 | 0 | 0 | 1   |
| RSZYD18187466_A_saliva.metaspades.bin.39                | 0.8 | 0 | 1 | 0 | 0   |
| GCA_007120515.1_ASM712051v1                             | 1   | 0 | 1 | 0 | 0   |
| R0170300115_tooth_RA.megahit.bin.16                     | 0.8 | 0 | 1 | 0 | 0   |
| RDPYD18097619_A_saliva.metaspades.bin.8                 | 1   | 0 | 1 | 0 | 0   |
| RDPYD18300066_A_saliva.metaspades.bin.10                | 1   | 0 | 1 | 0 | 0   |
| RSZYD18078104_A_saliva.metaspades.bin.107               | 1   | 0 | 1 | 0 | 0   |
| RDPYD18300192_A_saliva.metaspades.bin.52                | 0.6 | 0 | 1 | 0 | 0.5 |
| R0170300323_tooth_RAH.megahit.bin.84                    | 0.8 | 0 | 1 | 0 | 0   |
| GCA_947303265.1_SRR10912539_bin.36_metaWRAP_v1.3_MAG    | 1   | 1 | 0 | 0 | 1   |
| R0170300327_tooth_RA.megahit.bin.68                     | 0.8 | 0 | 1 | 0 | 0   |
| GCA_946619905.1_SRR873600_bin.141_metaWRAP_v1.3_MAG     | 0.8 | 1 | 0 | 0 | 1   |
| GCA_007127855.1_ASM712785v1                             | 1   | 0 | 1 | 0 | 0   |
| R0170300137_tooth_RA.megahit.bin.43                     | 0.2 | 0 | 1 | 0 | 0.5 |
| R0170300073_tooth_RA.megahit.bin.46                     | 0.8 | 0 | 1 | 0 | 0   |
| GCA_905371595.1_SRR9217384-mag-bin.1                    | 0.8 | 0 | 1 | 0 | 0.5 |
| R0170300306_tooth_RAH.megahit.bin.34                    | 1   | 0 | 1 | 0 | 0.5 |
| GCA_903937695.1_freshwater_MAG_---_Loc090907-1m_bin-354 | 0.5 | 0 | 1 | 0 | 0   |
| R0170300156_tooth_RA.megahit.bin.91                     | 0.8 | 0 | 1 | 0 | 0   |
| GCA_947366925.1_SRR15322611_bin.1_metawrap_v1.3_MAG     | 1   | 0 | 0 | 0 | 1   |
| GCA_947089645.1_SRR14038237_bin.40_metawrap_v1.3_MAG    | 1   | 0 | 0 | 0 | 1   |
| GCA_947059195.1_ERR9465699_bin.49_metawrap_v1.3_MAG     | 1   | 0 | 0 | 0 | 1   |
| RSZYD18078361_A_saliva.metaspades.bin.38                | 1   | 0 | 1 | 0 | 0   |
| RDPYD18189869_A_saliva.metaspades.bin.73                | 1   | 0 | 1 | 0 | 0   |
| RSZAXPI002309-18_RAH_dental.metaspades.bin.28           | 0.8 | 0 | 1 | 0 | 0   |
| GCA_017460225.1_ASM1746022v1                            | 1   | 1 | 0 | 0 | 0.5 |
| SZAXPI018286-123_RA_dental.metaspades.bin.12            | 0.9 | 0 | 1 | 0 | 0.5 |
| RSZAXPI002637-96_RA_dental.metaspades.bin.5             | 1   | 0 | 1 | 0 | 0.5 |
| RSZYD18078020_A_saliva.metaspades.bin.9                 | 1   | 0 | 1 | 0 | 0   |
| R0170300105_tooth_RA.megahit.bin.119                    | 0.8 | 0 | 1 | 0 | 0   |
| SZAXPI018171-25_1_RA_dental.metaspades.bin.52           | 1   | 0 | 1 | 0 | 0   |
| RSZYD18078354_A_saliva.metaspades.bin.16                | 1   | 0 | 1 | 0 | 0   |
| RSZYD18078697_A_saliva.metaspades.bin.17                | 1   | 0 | 1 | 0 | 0   |
| YS000231_saliva.spades.bin.18                           | 1   | 0 | 1 | 0 | 0   |
| RSZYD18078087_A_saliva.metaspades.bin.33                | 1   | 0 | 1 | 0 | 0   |
| RSZYD18187345_A_saliva.metaspades.bin.42                | 1   | 0 | 1 | 0 | 0   |
| RSZYD18187862_A_saliva.metaspades.bin.43                | 1   | 0 | 1 | 0 | 0   |
| RDPYD18300312_A_saliva.metaspades.bin.31                | 1   | 0 | 1 | 0 | 0   |
| YS000416_saliva.spades.bin.11                           | 1   | 0 | 1 | 0 | 0   |
| RDPYD18098875_A_saliva.metaspades.bin.44                | 1   | 0 | 1 | 0 | 0   |
| GCA_016283505.1_ASM1628350v1                            | 0.8 | 1 | 0 | 0 | 1   |
| GCA_017541245.1_ASM1754124v1                            | 0.8 | 1 | 0 | 0 | 1   |
| GCA_947429035.1_SRR19981115_bin.12_metawrap_v1.3_MAG    | 1   | 0 | 0 | 0 | 0.5 |
| GCA_947384105.1_ERR6760075_bin.53_metawrap_v1.3_MAG     | 1   | 0 | 0 | 0 | 0.5 |
| SZAXPI018096-17_RA_dental.metaspades.bin.34             | 0.8 | 0 | 1 | 0 | 0   |
| RSZYD18078473_A_saliva.metaspades.bin.18                | 1   | 0 | 1 | 0 | 0   |
| RSZYD18078648_A_saliva.metaspades.bin.16                | 1   | 0 | 1 | 0 | 0   |
| RSZYD18078140_A_saliva.metaspades.bin.44                | 1   | 0 | 0 | 0 | 1   |
| RSZAXPI002316-25_RAH_dental.metaspades.bin.26           | 0.9 | 0 | 1 | 0 | 0.5 |
| RSZYD18187281_A_saliva.metaspades.bin.17                | 1   | 0 | 1 | 0 | 0   |
| SZAXPI018312-14_RA_dental.metaspades.bin.87             | 0.8 | 0 | 1 | 0 | 0   |
| GCA_014377345.1_ASM1437734v1                            | 0.6 | 0 | 1 | 1 | 0   |
| GCA_017403895.1_ASM1740389v1                            | 1   | 1 | 0 | 0 | 0.5 |
| SZAXPI018176-32_RA_dental.metaspades.bin.12             | 0.9 | 0 | 1 | 0 | 0.5 |
| RSZYD18078152_A_saliva.metaspades.bin.41                | 1   | 0 | 1 | 0 | 0   |
| R0170300153_tooth_RA.megahit.bin.106                    | 0.8 | 0 | 1 | 0 | 0   |
| GCA_017511925.1_ASM1751192v1                            | 1   | 1 | 0 | 0 | 1   |
| R0170300124_tooth_RA.megahit.bin.51                     | 0.6 | 0 | 1 | 0 | 0.5 |
| GCA_947165465.1_SRR8387716_bin.80_metaWRAP_v1.3_MAG     | 0.8 | 1 | 0 | 0 | 1   |

|                                                      |     |   |   |   |     |
|------------------------------------------------------|-----|---|---|---|-----|
| RSZYD18187064_A_saliva.metaspades.bin.52             | 1   | 0 | 1 | 0 | 0   |
| YS000135_saliva.spades.bin.9                         | 1   | 0 | 1 | 0 | 0   |
| RSZYD18187425_A_saliva.metaspades.bin.18             | 1   | 0 | 1 | 0 | 0   |
| GCA_015257575.1_ASM1525757v1                         | 0.8 | 0 | 1 | 0 | 0   |
| GCA_017404935.1_ASM1740493v1                         | 1   | 1 | 0 | 0 | 1   |
| SZAXPI018286-123_RA_dental.metaspades.bin.63         | 0.8 | 0 | 1 | 0 | 0   |
| SZAXPI018184-41_RA_dental.metaspades.bin.37          | 0.6 | 0 | 1 | 0 | 0.5 |
| GCA_947165975.1_SRR8387714_bin.97_metaWRAP_v1.3_MAG  | 1   | 1 | 0 | 0 | 1   |
| GCA_017406565.1_ASM1740656v1                         | 1   | 1 | 0 | 0 | 1   |
| RSZAXPI002325-39_RAH_dental.metaspades.bin.28        | 1   | 0 | 1 | 0 | 0.5 |
| SRR6748158.metaspades.bin.2                          | 1   | 0 | 1 | 0 | 0   |
| R0170300181_tooth_RA.megahit.bin.88                  | 0.8 | 0 | 1 | 0 | 0   |
| SRR6748223.metaspades.bin.14                         | 1   | 0 | 1 | 0 | 0   |
| YS000166_saliva.spades.bin.9                         | 1   | 0 | 1 | 0 | 0   |
| GCA_947095985.1_SRR8786266_bin.1_metaWRAP_v1.3_MAG   | 1   | 0 | 1 | 0 | 0   |
| SZAXPI018484-16_RA_saliva.metaspades.bin.48          | 1   | 0 | 1 | 0 | 0   |
| R0170300195_tooth_RA.megahit.bin.89                  | 0.8 | 0 | 1 | 0 | 0   |
| R0170300268_tooth_RAH.megahit.bin.104                | 0.8 | 0 | 1 | 0 | 0   |
| GCA_905373835.1_SRR9217492-mag-bin.7                 | 0.6 | 0 | 1 | 0 | 0.5 |
| R0170300274_tooth_RAH.megahit.bin.17                 | 0.8 | 0 | 1 | 0 | 0   |
| YS000374_saliva.spades.bin.11                        | 1   | 0 | 1 | 0 | 0   |
| R0170300102_tooth_RA.megahit.bin.20                  | 0.9 | 0 | 1 | 0 | 0.5 |
| R0170300050_tooth_RA.megahit.bin.47                  | 0.8 | 0 | 1 | 0 | 0   |
| RSZYD18187065_A_saliva.metaspades.bin.38             | 1   | 0 | 1 | 0 | 0   |
| R0170300381_saliva_RAH.megahit.bin.27                | 1   | 0 | 1 | 0 | 0   |
| RSZYD18078315_A_saliva.metaspades.bin.18             | 0.8 | 0 | 1 | 0 | 0   |
| RDPYD18201650_A_saliva.metaspades.bin.5              | 1   | 0 | 1 | 0 | 0   |
| GCA_017459705.1_ASM1745970v1                         | 1   | 1 | 0 | 0 | 1   |
| SZAXPI011699-166_RA_dental.metaspades.bin.38         | 0.8 | 0 | 1 | 0 | 0   |
| R0170300222_tooth_RA.megahit.bin.94                  | 0.6 | 0 | 1 | 0 | 0.5 |
| R0170300256_tooth_RAH.megahit.bin.10                 | 0.9 | 0 | 1 | 0 | 0.5 |
| GCA_017510845.1_ASM1751084v1                         | 1   | 0 | 0 | 0 | 0.5 |
| SZAXPI018103-24_RA_dental.metaspades.bin.52          | 0.8 | 0 | 1 | 0 | 0   |
| GCA_946222005.1_ZZEVbxAAOO_bin.25.MAG                | 0.6 | 0 | 1 | 0 | 0.5 |
| R0170300390_saliva_RAH.megahit.bin.85                | 1   | 0 | 1 | 0 | 0   |
| SZAXPI018189-47_RA_dental.metaspades.bin.40          | 0.9 | 0 | 1 | 0 | 0.5 |
| RSZYD18187853_A_saliva.metaspades.bin.37             | 1   | 0 | 1 | 0 | 0   |
| GCA_946530965.1_SRR873598_bin.145_metaWRAP_v1.3_MAG  | 1   | 0 | 0 | 0 | 1   |
| R0170300298_tooth_RAH.megahit.bin.8                  | 0.8 | 0 | 1 | 0 | 0   |
| R0170300251_tooth_RAH.megahit.bin.31                 | 0.8 | 0 | 1 | 0 | 0   |
| SZAXPI018180-36_RA_dental.metaspades.bin.4           | 0.9 | 0 | 1 | 0 | 0.5 |
| YS000227_saliva.spades.bin.28                        | 1   | 0 | 1 | 0 | 0   |
| SRR6748162.metaspades.bin.9                          | 1   | 0 | 1 | 0 | 0   |
| RSZYD18187015_A_saliva.metaspades.bin.20             | 1   | 0 | 1 | 0 | 0   |
| RDPYD18088800_A_saliva.metaspades.bin.38             | 1   | 0 | 1 | 0 | 0   |
| RSZYD18187389_A_saliva.metaspades.bin.6              | 1   | 0 | 1 | 0 | 0   |
| RDPYD18189848_A_saliva.metaspades.bin.20             | 1   | 0 | 1 | 0 | 0   |
| GCA_946548715.1_SRR1222429_bin.13_metaWRAP_v1.3_MAG  | 1   | 1 | 0 | 0 | 1   |
| R0170300114_tooth_RA.megahit.bin.56                  | 0.4 | 0 | 1 | 0 | 0.5 |
| R0170300272_tooth_RAH.megahit.bin.12                 | 0.8 | 0 | 1 | 0 | 0   |
| R0170300092_tooth_RA.megahit.bin.66                  | 0.8 | 0 | 1 | 0 | 0   |
| GCA_946561855.1_SRR19792994_bin.70_metawrap_v1.3_MAG | 1   | 0 | 0 | 0 | 0.5 |
| GCA_947569885.1_SRR15604579_bin.36_metawrap_v1.3_MAG | 1   | 0 | 0 | 0 | 1   |
| R0170300170_tooth_RA.megahit.bin.155                 | 0.6 | 0 | 1 | 0 | 0.5 |
| RSZYD18187669_A_saliva.metaspades.bin.34             | 1   | 0 | 1 | 0 | 0   |
| GCA_017404515.1_ASM1740451v1                         | 1   | 0 | 0 | 0 | 1   |
| R0170300296_tooth_RAH.megahit.bin.125                | 0.8 | 0 | 1 | 0 | 0   |
| R0170300213_tooth_RA.megahit.bin.95                  | 0.8 | 0 | 1 | 0 | 0   |
| R0170300289_tooth_RAH.megahit.bin.36                 | 0.8 | 0 | 1 | 0 | 0   |
| GCA_947389435.1_SRR15214583_bin.47_metawrap_v1.3_MAG | 1   | 0 | 0 | 0 | 1   |
| GCA_947427335.1_SRR18439536_bin.19_metawrap_v1.3_MAG | 1   | 0 | 0 | 0 | 1   |
| RSZYD18078147_A_saliva.metaspades.bin.23             | 1   | 0 | 1 | 0 | 0   |
| GCA_017459845.1_ASM1745984v1                         | 1   | 1 | 0 | 0 | 0.5 |
| RSZYD18078550_A_saliva.metaspades.bin.59             | 1   | 0 | 1 | 0 | 0   |
| SZAXPI018272-74_RA_dental.metaspades.bin.18          | 0.8 | 0 | 1 | 0 | 0   |
| R0170300118_tooth_RA.megahit.bin.3                   | 0.8 | 0 | 1 | 0 | 0   |
| YS000625_saliva.spades.bin.29                        | 1   | 0 | 1 | 0 | 0   |
| SRR8114077.metaspades.bin.2                          | 1   | 0 | 1 | 0 | 0   |
| SRR8114076.metaspades.bin.27                         | 1   | 0 | 1 | 0 | 0   |
| RDPYD18097621_A_saliva.metaspades.bin.14             | 1   | 0 | 1 | 0 | 0   |
| YS000214_saliva.spades.bin.5                         | 1   | 0 | 1 | 0 | 0   |
| R0170300175_tooth_RA.megahit.bin.20                  | 0.8 | 0 | 1 | 0 | 0   |
| SZAXPI018317-19_RA_dental.metaspades.bin.4           | 0.8 | 0 | 1 | 0 | 0   |
| GCA_947171955.1_SRR14862904_bin.27_metawrap_v1.3_MAG | 1   | 0 | 0 | 0 | 0.5 |
| YS000535_saliva.spades.bin.35                        | 0.9 | 0 | 1 | 0 | 0   |
| RDPYD18098768_A_saliva.metaspades.bin.59             | 1   | 0 | 0 | 0 | 0   |
| GCA_024330325.1_ASM2433032v1                         | 1   | 0 | 1 | 0 | 0   |
| GCA_017531585.1_ASM1753158v1                         | 1   | 0 | 0 | 0 | 1   |



|                                                      |     |   |   |   |     |
|------------------------------------------------------|-----|---|---|---|-----|
| RSZAXPI002675-22_RA_dental.metaspades.bin.61         | 0.6 | 0 | 1 | 0 | 0.5 |
| R0170300157_tooth_RA.megahit.bin.55                  | 1   | 0 | 1 | 0 | 0.5 |
| RSZAXPI002331-56_RAH_dental.metaspades.bin.3         | 0.9 | 0 | 1 | 0 | 0.5 |
| RSZYD18078773_A_saliva.metaspades.bin.71             | 1   | 0 | 1 | 0 | 0   |
| YS000122_saliva.spades.bin.4                         | 1   | 0 | 1 | 0 | 0   |
| RDPYD18189916_A_saliva.metaspades.bin.45             | 1   | 0 | 1 | 0 | 0   |
| GCA_017431955.1_ASM1743195v1                         | 1   | 0 | 0 | 0 | 0.5 |
| YS001151_saliva.spades.bin.14                        | 1   | 0 | 1 | 0 | 0   |
| GCA_016196105.1_ASM1619610v1                         | 0.6 | 0 | 1 | 1 | 0   |
| GCA_016178135.1_ASM1617813v1                         | 0.6 | 0 | 1 | 1 | 0   |
| R0170300065_tooth_RA.megahit.bin.81                  | 0.9 | 0 | 1 | 0 | 0.5 |
| GCA_905372785.1_SRR9217428-mag-bin.23                | 0.8 | 0 | 1 | 0 | 0   |
| R0170300298_tooth_RAH.megahit.bin.126                | 0.8 | 0 | 1 | 0 | 0   |
| YS000545_saliva.spades.bin.26                        | 1   | 0 | 1 | 0 | 0   |
| SZAXPI018318-20_RA_dental.metaspades.bin.6           | 0.6 | 0 | 1 | 0 | 0.5 |
| R0170300270_tooth_RAH.megahit.bin.24                 | 0.8 | 0 | 1 | 0 | 0   |
| RDPYD18189868_A_saliva.metaspades.bin.61             | 1   | 0 | 1 | 0 | 0   |
| GCA_014191035.1_ASM1419103v1                         | 0.8 | 0 | 0 | 0 | 0   |
| YS000473_saliva.spades.bin.3                         | 1   | 0 | 1 | 0 | 0   |
| RSZYD18187911_A_saliva.metaspades.bin.37             | 1   | 0 | 1 | 0 | 0   |
| GCA_017514025.1_ASM1751402v1                         | 1   | 1 | 0 | 0 | 1   |
| SZAXPI018277-90_RA_dental.metaspades.bin.45          | 0.9 | 0 | 1 | 0 | 0.5 |
| RDPYD18099149_A_tongue.metaspades.bin.20             | 1   | 0 | 1 | 0 | 0   |
| GCA_023259925.1_ASM2325992v1                         | 0.4 | 0 | 1 | 1 | 0   |
| YS000410_saliva.spades.bin.12                        | 0.8 | 0 | 1 | 0 | 0   |
| GCA_024699125.1_ASM2469912v1                         | 1   | 1 | 0 | 0 | 0.5 |
| GCA_947168545.1_SRR8387715_bin.82_metaWRAP_v1.3_MAG  | 1   | 1 | 0 | 0 | 0.5 |
| RSZYD18078042_A_saliva.metaspades.bin.39             | 0.6 | 0 | 1 | 0 | 0.5 |
| GCA_027345405.1_ASM2734540v1                         | 0.8 | 0 | 1 | 1 | 0.5 |
| R0170300334_saliva_RA.megahit.bin.69                 | 1   | 0 | 1 | 0 | 0   |
| RSZYD18187916_A_saliva.metaspades.bin.50             | 1   | 0 | 1 | 0 | 0   |
| GCA_017432025.1_ASM1743202v1                         | 0.8 | 1 | 0 | 0 | 1   |
| RDPYD18300275_A_saliva.metaspades.bin.16             | 1   | 0 | 1 | 0 | 0   |
| YS000273_saliva.spades.bin.9                         | 1   | 0 | 1 | 0 | 0   |
| RSZYD18078153_A_saliva.metaspades.bin.25             | 1   | 0 | 1 | 0 | 0   |
| RDPYD18201598_A_saliva.metaspades.bin.37             | 1   | 0 | 1 | 0 | 0   |
| GCA_017545505.1_ASM1754550v1                         | 1   | 1 | 0 | 0 | 1   |
| GCA_017619315.1_ASM1761931v1                         | 1   | 1 | 0 | 0 | 1   |
| R0170300250_tooth_RAH.megahit.bin.53                 | 0.8 | 0 | 1 | 0 | 0   |
| R0170300244_tooth_RAH.megahit.bin.80                 | 0.8 | 0 | 1 | 0 | 0   |
| R0170300158_tooth_RA.megahit.bin.24                  | 0.8 | 0 | 1 | 0 | 0   |
| YS000391_saliva.spades.bin.1                         | 0.8 | 0 | 1 | 0 | 0   |
| SZAXPI018493-25_RA_saliva.metaspades.bin.44          | 1   | 0 | 0 | 0 | 1   |
| GCA_016286785.1_ASM1628678v1                         | 1   | 1 | 0 | 0 | 1   |
| RDPYD18098839_A_saliva.metaspades.bin.19             | 1   | 0 | 1 | 0 | 0   |
| RDPYD18098859_A_saliva.metaspades.bin.8              | 1   | 0 | 1 | 0 | 0   |
| RSZYD18187004_A_saliva.metaspades.bin.5              | 0.9 | 0 | 1 | 0 | 0   |
| SZAXPI018275-88_RA_dental.metaspades.bin.49          | 0.8 | 0 | 1 | 0 | 0   |
| RDPYD18189836_A_saliva.metaspades.bin.24             | 1   | 0 | 1 | 0 | 0   |
| GCA_017432105.1_ASM1743210v1                         | 1   | 1 | 0 | 0 | 1   |
| GCA_017512045.1_ASM1751204v1                         | 1   | 0 | 0 | 0 | 0.5 |
| GCA_014377525.1_ASM1437752v1                         | 0.8 | 0 | 1 | 1 | 0   |
| SZAXPI018291-142_RA_dental.metaspades.bin.37         | 0.4 | 0 | 1 | 0 | 0.5 |
| YS001132_saliva.spades.bin.25                        | 0.9 | 0 | 1 | 0 | 0   |
| GCA_027427055.1_ASM2742705v1                         | 0.6 | 0 | 1 | 1 | 0   |
| GCA_017482785.1_ASM1748278v1                         | 1   | 1 | 0 | 0 | 0.5 |
| RSZAXPI002609-25_RA_dental.metaspades.bin.46         | 0.8 | 0 | 1 | 0 | 0   |
| RSZYD18078796_A_saliva.metaspades.bin.47             | 1   | 0 | 1 | 0 | 0   |
| RSZYD18187306_A_saliva.metaspades.bin.13             | 1   | 0 | 1 | 0 | 0   |
| GCA_947388865.1_SRR15214599_bin.4_metawrap_v1.3_MAG  | 1   | 0 | 0 | 0 | 1   |
| GCA_947304395.1_SRR10912535_bin.78_metaWRAP_v1.3_MAG | 0.8 | 1 | 0 | 0 | 1   |
| RDPYD18189853_A_saliva.metaspades.bin.43             | 1   | 0 | 1 | 0 | 0   |
| YS000463_saliva.spades.bin.2                         | 1   | 0 | 1 | 0 | 0   |
| GCA_013694995.1_ASM1369499v1                         | 0.6 | 0 | 1 | 1 | 0   |
| SZAXPI018271-62_RA_dental.metaspades.bin.3           | 1   | 0 | 1 | 0 | 0   |
| RSZYD18187640_A_saliva.metaspades.bin.22             | 1   | 0 | 1 | 0 | 0   |
| GCA_017406595.1_ASM1740659v1                         | 1   | 1 | 0 | 0 | 1   |
| GCA_017432225.1_ASM1743222v1                         | 1   | 1 | 0 | 0 | 1   |
| R0170300160_tooth_RA.megahit.bin.83                  | 0.4 | 0 | 1 | 0 | 0.5 |
| GCA_947246665.1_SRR14920969_bin.19_metawrap_v1.3_MAG | 1   | 0 | 0 | 0 | 1   |
| GCA_002337095.1_ASM233709v1                          | 0.5 | 0 | 1 | 0 | 0.5 |
| GCA_017652765.1_ASM1765276v1                         | 1   | 1 | 0 | 0 | 1   |
| RSZYD18078630_A_saliva.metaspades.bin.13             | 1   | 0 | 1 | 0 | 0   |
| GCA_017515285.1_ASM1751528v1                         | 1   | 0 | 0 | 0 | 0.5 |
| YS000348_saliva.spades.bin.15                        | 1   | 0 | 1 | 0 | 0   |
| R0170300159_tooth_RA.megahit.bin.123                 | 0.8 | 0 | 1 | 0 | 0   |
| GCA_947428935.1_SRR19981124_bin.14_metawrap_v1.3_MAG | 1   | 0 | 0 | 0 | 1   |
| RSZYD18187841_A_saliva.metaspades.bin.58             | 1   | 0 | 1 | 0 | 0   |

|                                                      |     |   |   |   |     |
|------------------------------------------------------|-----|---|---|---|-----|
| RSZYD18078301_A_saliva.metaspades.bin.16             | 1   | 0 | 1 | 0 | 0   |
| GCA_015257495.1_ASM1525749v1                         | 1   | 0 | 1 | 0 | 0   |
| RDPYD18088983_A_saliva.metaspades.bin.11             | 1   | 0 | 1 | 0 | 0   |
| RDPYD18189889_A_saliva.metaspades.bin.54             | 1   | 0 | 1 | 0 | 0   |
| R0170300071_tooth_RA.megahit.bin.81                  | 0.5 | 0 | 1 | 0 | 0   |
| R0170300135_tooth_RA.megahit.bin.82                  | 0.6 | 0 | 1 | 0 | 0.5 |
| YS000025_saliva.spades.bin.20                        | 1   | 0 | 1 | 0 | 0   |
| RSZYD18187301_A_saliva.metaspades.bin.29             | 1   | 0 | 1 | 0 | 0   |
| RSZAXPI002657-17_RA_dental.metaspades.bin.42         | 0.9 | 0 | 1 | 0 | 0.5 |
| YS000883_saliva.spades.bin.12                        | 1   | 0 | 1 | 0 | 0   |
| YS000394_saliva.spades.bin.25                        | 1   | 0 | 1 | 0 | 0   |
| RSZAXPI002641-101_RA_dental.metaspades.bin.62        | 0.9 | 0 | 1 | 0 | 0   |
| GCA_025449905.1_ASM2544990v1                         | 0.6 | 0 | 1 | 0 | 0   |
| R0170300210_tooth_RA.megahit.bin.1                   | 0.8 | 0 | 1 | 0 | 0   |
| YS000906_saliva.spades.bin.34                        | 0.8 | 0 | 1 | 0 | 0   |
| GCA_013816445.1_ASM1381644v1                         | 0.6 | 0 | 1 | 0 | 0   |
| R0170300279_tooth_RAH.megahit.bin.27                 | 0.8 | 0 | 1 | 0 | 0   |
| R0170300203_tooth_RA.megahit.bin.94                  | 0.4 | 0 | 1 | 0 | 0.5 |
| GCA_017613135.1_ASM1761313v1                         | 1   | 1 | 0 | 0 | 1   |
| GCA_017510385.1_ASM1751038v1                         | 1   | 0 | 0 | 0 | 1   |
| SZAXPI018187-45_RA_dental.metaspades.bin.28          | 0.6 | 0 | 1 | 0 | 0.5 |
| SZAXPI018317-19_RA_dental.metaspades.bin.69          | 1   | 0 | 0 | 0 | 0   |
| R0170300277_tooth_RAH.megahit.bin.101                | 0.8 | 0 | 1 | 0 | 0   |
| RSZAXPI002682-32_RA_saliva.metaspades.bin.12         | 1   | 0 | 1 | 0 | 0   |
| RSZYD18187427_A_saliva.metaspades.bin.75             | 1   | 0 | 1 | 0 | 0   |
| YS000165_saliva.spades.bin.32                        | 1   | 0 | 1 | 0 | 0   |
| R0170300255_tooth_RAH.megahit.bin.83                 | 0.8 | 0 | 1 | 0 | 0   |
| R0170300148_tooth_RA.megahit.bin.4                   | 0.8 | 0 | 1 | 0 | 0   |
| YS000371_saliva.spades.bin.7                         | 1   | 0 | 1 | 0 | 0   |
| RSZYD18078102_A_saliva.metaspades.bin.17             | 1   | 0 | 1 | 0 | 0   |
| RDPYD18189913_A_saliva.metaspades.bin.17             | 1   | 0 | 1 | 0 | 0   |
| GCA_024697865.1_ASM2469786v1                         | 1   | 1 | 1 | 0 | 0.5 |
| R0170300202_tooth_RA.megahit.bin.65                  | 1   | 0 | 1 | 0 | 1   |
| RSZYD18078483_A_saliva.metaspades.bin.4              | 1   | 0 | 1 | 0 | 0   |
| GCA_017506895.1_ASM1750689v1                         | 1   | 1 | 0 | 0 | 1   |
| RDPYD18300291_A_saliva.metaspades.bin.51             | 1   | 0 | 1 | 0 | 0   |
| RDPYD18189907_A_saliva.metaspades.bin.26             | 1   | 0 | 1 | 0 | 0   |
| YS000553_saliva.spades.bin.6                         | 1   | 0 | 1 | 0 | 0   |
| R0170300136_tooth_RA.megahit.bin.7                   | 0.8 | 0 | 1 | 0 | 0   |
| GCA_946408075.1_SRR12081296_bin.6_metaWRAP_v1.3_MAG  | 1   | 1 | 0 | 0 | 0.5 |
| GCA_947367795.1_SRR15431173_bin.17_metawrap_v1.3_MAG | 1   | 0 | 0 | 0 | 1   |
| GCA_025934715.1_ASM2593471v1                         | 0.4 | 0 | 1 | 1 | 0   |
| GCA_017431945.1_ASM1743194v1                         | 1   | 1 | 0 | 0 | 1   |
| RSZYD18187457_A_saliva.metaspades.bin.42             | 1   | 0 | 1 | 0 | 0   |
| GCA_947066265.1_ERR899284_bin.41_metawrap_v1.3_MAG   | 1   | 0 | 0 | 0 | 1   |
| YS000007_saliva.spades.bin.7                         | 0.9 | 0 | 1 | 0 | 0   |
| GCA_905372495.1_SRR9217423-mag-bin.7                 | 1   | 0 | 0 | 0 | 1   |
| SRR8114034.metaspades.bin.21                         | 1   | 0 | 1 | 0 | 0   |
| R0170300139_tooth_RA.megahit.bin.99                  | 0.8 | 0 | 1 | 0 | 0   |
| R0170300204_tooth_RA.megahit.bin.65                  | 0.9 | 0 | 1 | 0 | 0   |
| R0170300272_tooth_RAH.megahit.bin.25                 | 0.8 | 0 | 1 | 0 | 0   |
| GCA_027311865.1_ASM2731186v1                         | 0.6 | 0 | 1 | 0 | 0.5 |
| RDPYD18075171_A_saliva.metaspades.bin.8              | 1   | 0 | 1 | 0 | 0   |
| GCA_013333645.2_ASM1333364v2                         | 0.6 | 0 | 1 | 0 | 0.5 |
| GCA_947362105.1_SRR15194760_bin.16_metawrap_v1.3_MAG | 1   | 0 | 0 | 0 | 1   |
| RSZYD18187169_A_saliva.metaspades.bin.33             | 1   | 0 | 1 | 0 | 0   |
| RSZYD18187500_A_saliva.metaspades.bin.18             | 1   | 0 | 1 | 0 | 0   |
| GCA_016280905.1_ASM1628090v1                         | 1   | 1 | 0 | 0 | 1   |
| R0170300273_tooth_RAH.megahit.bin.122                | 0.8 | 0 | 1 | 0 | 0   |
| R0170300265_tooth_RAH.megahit.bin.69                 | 0.8 | 0 | 1 | 0 | 0   |
| GCA_017515785.1_ASM1751578v1                         | 1   | 1 | 0 | 0 | 0.5 |
| GCA_007845265.1_ASM784526v1                          | 1   | 0 | 1 | 0 | 0   |
| RDPYD18101881_A_saliva.metaspades.bin.12             | 0.8 | 0 | 1 | 0 | 0   |
| R0170300208_tooth_RA.megahit.bin.73                  | 0.8 | 0 | 1 | 0 | 0   |
| RSZAXPI002653-13_RA_saliva.metaspades.bin.70         | 1   | 0 | 1 | 0 | 0   |
| GCA_947648615.1_SRR15633991_bin.36_metawrap_v1.3_MAG | 1   | 0 | 0 | 0 | 1   |
| YS000057_saliva.spades.bin.9                         | 0.8 | 0 | 1 | 0 | 0   |
| GCA_002839415.1_ASM283941v1                          | 0.9 | 0 | 1 | 0 | 0.5 |
| RSZYD18187358_A_saliva.metaspades.bin.22             | 1   | 0 | 1 | 0 | 0   |
| GCA_903837875.1_freshwater_MAG_---_Umea_bin-00478    | 0.6 | 0 | 1 | 0 | 0   |
| GCA_946411665.1_SRR12081298_bin.32_metaWRAP_v1.3_MAG | 0.8 | 0 | 0 | 0 | 1   |
| RSZAXPI002326-41_RAH_dental.metaspades.bin.8         | 1   | 0 | 0 | 0 | 1   |
| GCA_947087275.1_SRR14038240_bin.4_metawrap_v1.3_MAG  | 1   | 0 | 0 | 0 | 1   |
| YS000364_saliva.spades.bin.27                        | 1   | 0 | 1 | 0 | 0   |
| RSZYD18187540_A_saliva.metaspades.bin.35             | 0.8 | 0 | 1 | 0 | 0   |
| RSZYD18078542_A_saliva.metaspades.bin.5              | 1   | 0 | 1 | 0 | 0   |
| R0170300210_tooth_RA.megahit.bin.95                  | 0.9 | 0 | 1 | 0 | 0   |
| GCA_017511845.1_ASM1751184v1                         | 1   | 1 | 0 | 0 | 1   |

|                                                           |     |   |   |   |     |
|-----------------------------------------------------------|-----|---|---|---|-----|
| RSZYD18078746_A_saliva.metaspades.bin.2                   | 0.8 | 0 | 1 | 0 | 0   |
| R0170300100_tooth_RA.megahit.bin.107                      | 0.8 | 0 | 1 | 0 | 0   |
| R0170300294_tooth_RAH.megahit.bin.65                      | 0.8 | 0 | 1 | 0 | 0   |
| YS000948_saliva.spades.bin.2                              | 0.9 | 0 | 1 | 0 | 0   |
| GCA_017431465.1_ASM1743146v1                              | 1   | 0 | 0 | 0 | 0.5 |
| R0170300179_tooth_RA.megahit.bin.15                       | 0.6 | 0 | 1 | 0 | 0.5 |
| RDPYD18300328_A_saliva.metaspades.bin.32                  | 1   | 0 | 1 | 0 | 0   |
| GCA_001788555.1_ASM178855v1                               | 0.4 | 0 | 1 | 0 | 0   |
| R0170300299_tooth_RAH.megahit.bin.97                      | 0.8 | 0 | 1 | 0 | 0   |
| SZAXPI018099-20_RA_dental.metaspades.bin.40               | 0.8 | 0 | 1 | 0 | 0   |
| R0170300194_tooth_RA.megahit.bin.76                       | 0.8 | 0 | 1 | 0 | 0   |
| R0170300176_tooth_RA.megahit.bin.97                       | 0.8 | 0 | 1 | 0 | 0   |
| R0170300193_tooth_RA.megahit.bin.57                       | 0.8 | 0 | 1 | 0 | 0   |
| R0170300259_tooth_RAH.megahit.bin.10                      | 0.8 | 0 | 1 | 0 | 0   |
| GCA_013333495.2_ASM1333349v2                              | 0.8 | 0 | 1 | 0 | 0   |
| GCA_017430785.1_ASM1743078v1                              | 1   | 1 | 0 | 0 | 0.5 |
| GCA_017460065.1_ASM1746006v1                              | 1   | 1 | 0 | 0 | 1   |
| RSZYD18078355_A_saliva.metaspades.bin.74                  | 1   | 0 | 1 | 0 | 0   |
| RSZYD18187914_A_saliva.metaspades.bin.1                   | 1   | 0 | 1 | 0 | 0   |
| R0170300300_tooth_RAH.megahit.bin.146                     | 0.8 | 0 | 1 | 0 | 0   |
| YS000455_saliva.spades.bin.37                             | 1   | 0 | 1 | 0 | 0   |
| GCA_903918245.1_freshwater_MAG_---_AM-lipid-01-D1_bin-099 | 0.5 | 0 | 1 | 1 | 0   |
| RSZAXPI002318-27_RAH_dental.metaspades.bin.48             | 0.9 | 0 | 1 | 0 | 0.5 |
| RSZAXPI002612-20_RA_dental.metaspades.bin.34              | 0.9 | 0 | 1 | 0 | 0.5 |
| YS000871_saliva.spades.bin.22                             | 1   | 0 | 1 | 0 | 0   |
| R0170300265_tooth_RAH.megahit.bin.100                     | 0.9 | 0 | 1 | 0 | 0   |
| GCA_017557865.1_ASM1755786v1                              | 1   | 1 | 0 | 0 | 0.5 |
| YS000127_saliva.spades.bin.16                             | 0.8 | 0 | 1 | 0 | 0   |
| R0170300079_tooth_RA.megahit.bin.64                       | 0.8 | 0 | 1 | 0 | 0   |
| SZAXPI018288-133_RA_dental.metaspades.bin.72              | 0.9 | 0 | 1 | 0 | 0   |
| R0170300136_tooth_RA.megahit.bin.76                       | 1   | 0 | 1 | 0 | 0.5 |
| GCA_013316435.1_ASM1331643v1                              | 1   | 0 | 0 | 0 | 0.5 |
| R0170300266_tooth_RAH.megahit.bin.30                      | 0.9 | 0 | 0 | 0 | 0   |
| YS000449_saliva.spades.bin.9                              | 1   | 0 | 1 | 0 | 0   |
| GCA_002371895.1_ASM237189v1                               | 0.8 | 1 | 0 | 0 | 1   |
| YS000740_saliva.spades.bin.23                             | 0.8 | 0 | 1 | 0 | 0   |
| GCA_947425245.1_SRR19981124_bin.25_metawrap_v1.3_MAG      | 1   | 0 | 0 | 0 | 1   |
| R0170300323_tooth_RAH.megahit.bin.52                      | 1   | 0 | 1 | 0 | 0.5 |
| YS000402_saliva.spades.bin.13                             | 0.8 | 0 | 1 | 0 | 0   |
| RDPYD18098964_A_saliva.metaspades.bin.45                  | 1   | 0 | 1 | 0 | 0   |
| RSZYD18078604_A_saliva.metaspades.bin.57                  | 1   | 0 | 1 | 0 | 0   |
| GCA_017537745.1_ASM1753774v1                              | 1   | 1 | 0 | 0 | 1   |
| GCA_027459325.1_ASM2745932v1                              | 0.5 | 0 | 1 | 1 | 0   |
| YS000759_saliva.spades.bin.28                             | 1   | 0 | 1 | 0 | 0   |
| GCA_947304955.1_SRR10912542_bin.53_metaWRAP_v1.3_MAG      | 1   | 0 | 0 | 0 | 0.5 |
| GCA_007845355.1_ASM784535v1                               | 1   | 0 | 1 | 0 | 0   |
| GCA_017510445.1_ASM1751044v1                              | 1   | 1 | 0 | 0 | 1   |
| GCA_027427115.1_ASM2742711v1                              | 0.1 | 0 | 1 | 1 | 0   |
| GCA_017432425.1_ASM1743242v1                              | 1   | 0 | 0 | 0 | 0.5 |
| RDPYD18300408_A_saliva.metaspades.bin.21                  | 1   | 0 | 1 | 0 | 0   |
| GCA_017404325.1_ASM1740432v1                              | 1   | 1 | 0 | 0 | 1   |
| RSZYD18078346_A_saliva.metaspades.bin.17                  | 1   | 0 | 1 | 0 | 0   |
| RDPYD18098882_A_saliva.metaspades.bin.1                   | 1   | 0 | 1 | 0 | 0   |
| SZAXPI018271-62_RA_dental.metaspades.bin.80               | 0.8 | 0 | 1 | 0 | 0   |
| R0170300293_tooth_RAH.megahit.bin.36                      | 0.9 | 0 | 1 | 0 | 0.5 |
| YS000722_saliva.spades.bin.22                             | 0.9 | 0 | 1 | 0 | 0   |
| RSZAXPI002620-35_RA_dental.metaspades.bin.36              | 0.8 | 0 | 1 | 0 | 0   |
| GCA_017515205.1_ASM1751520v1                              | 1   | 1 | 0 | 0 | 1   |
| GCA_947367495.1_SRR15429271_bin.12_metawrap_v1.3_MAG      | 1   | 0 | 0 | 0 | 0.5 |
| R0170300283_tooth_RAH.megahit.bin.67                      | 0.9 | 0 | 1 | 0 | 0   |
| R0170300222_tooth_RA.megahit.bin.35                       | 0.9 | 0 | 1 | 0 | 0   |
| GCA_946414465.1_SRR12081303_bin.63_metaWRAP_v1.3_MAG      | 1   | 1 | 0 | 0 | 1   |
| R0170300181_tooth_RA.megahit.bin.83                       | 0.8 | 0 | 1 | 0 | 0   |
| YS000685_saliva.spades.bin.9                              | 0.9 | 0 | 1 | 0 | 0   |
| RSZYD18078747_A_saliva.metaspades.bin.1                   | 0.8 | 0 | 1 | 0 | 0   |
| SZAXPI018320-22_RA_dental.metaspades.bin.15               | 0.8 | 0 | 1 | 0 | 0   |
| RSZYD18187210_A_saliva.metaspades.bin.21                  | 1   | 0 | 1 | 0 | 0   |
| R0170300281_tooth_RAH.megahit.bin.128                     | 0.8 | 0 | 0 | 0 | 0   |
| GCA_017404335.1_ASM1740433v1                              | 1   | 1 | 0 | 0 | 1   |
| YS000296_saliva.spades.bin.5                              | 1   | 0 | 1 | 0 | 0   |
| YS000487_saliva.spades.bin.36                             | 1   | 0 | 1 | 0 | 0   |
| R0170300298_tooth_RAH.megahit.bin.124                     | 1   | 0 | 0 | 0 | 1   |
| R0170300204_tooth_RA.megahit.bin.78                       | 1   | 0 | 0 | 0 | 1   |
| R0170300269_tooth_RAH.megahit.bin.127                     | 1   | 0 | 0 | 0 | 1   |
| RDPYD18098900_A_saliva.metaspades.bin.51                  | 1   | 0 | 1 | 0 | 0   |
| RSZAXPI002311-20_RAH_dental.metaspades.bin.31             | 0.6 | 0 | 0 | 0 | 0   |
| R0170300149_tooth_RA.megahit.bin.32                       | 0.6 | 0 | 1 | 0 | 0.5 |
| RSZAXPI002311-20_RAH_dental.metaspades.bin.6              | 0.5 | 0 | 1 | 0 | 0   |



|                                                      |     |   |   |   |     |
|------------------------------------------------------|-----|---|---|---|-----|
| SZAXPI018281-102_RA_dental.metaspades.bin.20         | 0.6 | 0 | 1 | 0 | 0.5 |
| R0170300137_tooth_RA.megahit.bin.75                  | 0.9 | 0 | 1 | 0 | 0   |
| RSZAXPI002673-20_RA_dental.metaspades.bin.3          | 0.3 | 0 | 1 | 0 | 0   |
| RDPYD18300371_A_saliva.metaspades.bin.29             | 1   | 0 | 1 | 0 | 0   |
| R0170300280_tooth_RAH.megahit.bin.16                 | 1   | 0 | 0 | 0 | 1   |
| GCA_018058565.1_ASM1805856v1                         | 1   | 0 | 0 | 0 | 0.5 |
| RDPYD18189858_A_saliva.metaspades.bin.8              | 1   | 0 | 1 | 0 | 0   |
| GCA_017545525.1_ASM1754552v1                         | 1   | 1 | 0 | 0 | 0.5 |
| YS001002_saliva.spades.bin.13                        | 0.9 | 0 | 1 | 0 | 0   |
| RDPYD18189960_A_saliva.metaspades.bin.59             | 0.8 | 0 | 1 | 0 | 0   |
| R0170300283_tooth_RAH.megahit.bin.89                 | 0.8 | 0 | 1 | 0 | 0   |
| R0170300267_tooth_RAH.megahit.bin.31                 | 0.8 | 0 | 1 | 0 | 0   |
| GCA_943353165.1_RH-20apr16-349                       | 0.6 | 0 | 1 | 0 | 0   |
| RSZAXPI002629-81_RA_dental.metaspades.bin.76         | 0.4 | 0 | 1 | 0 | 0.5 |
| GCA_947429355.1_SRR19981115_bin.23_metawrap_v1.3_MAG | 1   | 0 | 0 | 0 | 1   |
| RSZYD18187280_A_saliva.metaspades.bin.37             | 1   | 0 | 1 | 0 | 0   |
| GCA_947296925.1_SRR19390379_bin.6_metawrap_v1.3_MAG  | 1   | 0 | 0 | 0 | 1   |
| RSZYD18187361_A_saliva.metaspades.bin.8              | 0.8 | 0 | 1 | 0 | 0   |
| YS000234_saliva.spades.bin.16                        | 1   | 0 | 1 | 0 | 0   |
| RDPYD18088792_A_saliva.metaspades.bin.66             | 1   | 0 | 1 | 0 | 0   |
| RSZYD18187299_A_saliva.metaspades.bin.6              | 1   | 0 | 1 | 0 | 0   |
| GCA_017404955.1_ASM1740495v1                         | 1   | 0 | 0 | 0 | 1   |
| RSZYD18187069_A_saliva.metaspades.bin.26             | 1   | 0 | 1 | 0 | 0   |
| R0170300164_tooth_RA.megahit.bin.80                  | 1   | 0 | 0 | 0 | 1   |
| YS000547_saliva.spades.bin.14                        | 1   | 0 | 1 | 0 | 0   |
| R0170300062_tooth_RA.megahit.bin.61                  | 0.6 | 0 | 1 | 0 | 0.5 |
| SZAXPI018172-26_RA_dental.metaspades.bin.32          | 0.6 | 0 | 1 | 0 | 0.5 |
| GCA_947057165.1_ERR9465706_bin.42_metawrap_v1.3_MAG  | 1   | 0 | 0 | 0 | 0.5 |
| RSZAXPI002321-33_RAH_dental.metaspades.bin.17        | 0.8 | 0 | 1 | 0 | 0   |
| R0170300241_tooth_RAH.megahit.bin.63                 | 0.8 | 0 | 1 | 0 | 0   |
| GCA_017557805.1_ASM1755780v1                         | 1   | 0 | 0 | 0 | 1   |
| RSZYD18078781_A_saliva.metaspades.bin.11             | 0.8 | 0 | 1 | 0 | 0   |
| GCA_017434485.1_ASM1743448v1                         | 1   | 0 | 0 | 0 | 0.5 |
| GCA_017421325.1_ASM1742132v1                         | 0.8 | 1 | 0 | 0 | 1   |
| SZAXPI018277-90_RA_dental.metaspades.bin.77          | 1   | 0 | 0 | 0 | 1   |
| RSZYD18187324_A_saliva.metaspades.bin.25             | 1   | 0 | 1 | 0 | 0   |
| GCA_927910745.1_ERR3827327_bin.3_metaWRAP_v1.1_MAG   | 0.6 | 0 | 1 | 0 | 0.5 |
| RDPYD18189898_A_saliva.metaspades.bin.76             | 1   | 0 | 1 | 0 | 0   |
| SZAXPI018273-75_RA_dental.metaspades.bin.22          | 0.8 | 0 | 1 | 0 | 0   |
| GCA_009783305.1_ASM978330v1                          | 1   | 0 | 0 | 0 | 1   |
| GCA_903828465.1_freshwater_MAG_---_Umea3_bin-2596    | 0.6 | 0 | 1 | 0 | 0   |
| YS000433_saliva.spades.bin.7                         | 1   | 0 | 1 | 0 | 0   |
| R0170300133_tooth_RA.megahit.bin.51                  | 0.8 | 0 | 1 | 0 | 0   |
| R0170300309_tooth_RAH.megahit.bin.66                 | 0.8 | 0 | 1 | 0 | 0   |
| R0170300092_tooth_RA.megahit.bin.51                  | 0.9 | 0 | 1 | 0 | 0.5 |
| GCA_947068245.1_SRR12358625_bin.21_metawrap_v1.3_MAG | 1   | 0 | 0 | 0 | 1   |
| RSZYD18187203_A_saliva.metaspades.bin.7              | 1   | 0 | 1 | 0 | 0   |
| SZAXPI018098-19_RA_dental.metaspades.bin.54          | 0.8 | 0 | 1 | 0 | 0   |
| RDPYD18300324_A_saliva.metaspades.bin.14             | 1   | 0 | 1 | 0 | 0   |
| GCA_947346675.1_SRR14629574_bin.28_metawrap_v1.3_MAG | 1   | 0 | 0 | 0 | 1   |
| GCA_947565505.1_SRR19759417_bin.86_metawrap_v1.3_MAG | 0.8 | 0 | 0 | 0 | 1   |
| YS001130_saliva.spades.bin.26                        | 0.8 | 0 | 1 | 0 | 0   |
| GCA_947388495.1_SRR15214593_bin.20_metawrap_v1.3_MAG | 1   | 0 | 0 | 0 | 1   |
| RDPYD18123880_A_tongue.metaspades.bin.23             | 1   | 0 | 0 | 0 | 1   |
| R0170300229_tooth_RA.megahit.bin.108                 | 1   | 0 | 0 | 0 | 1   |
| R0170300170_tooth_RA.megahit.bin.6                   | 1   | 0 | 0 | 0 | 1   |
| SZAXPI018312-14_RA_dental.metaspades.bin.62          | 1   | 0 | 0 | 0 | 1   |
| R0170300165_tooth_RA.megahit.bin.3                   | 1   | 0 | 0 | 0 | 1   |
| RDPYD18123870_A_saliva.metaspades.bin.24             | 1   | 0 | 0 | 0 | 1   |
| R0170300070_tooth_RA.megahit.bin.58                  | 1   | 0 | 0 | 0 | 1   |
| R0170300203_tooth_RA.megahit.bin.90                  | 1   | 0 | 0 | 0 | 1   |
| RSZYD18078738_A_saliva.metaspades.bin.63             | 1   | 0 | 1 | 0 | 0   |
| RSZYD18187460_A_saliva.metaspades.bin.2              | 1   | 0 | 1 | 0 | 0   |
| GCA_947388885.1_SRR15214585_bin.22_metawrap_v1.3_MAG | 1   | 0 | 0 | 0 | 0.5 |
| GCA_016183515.1_ASM1618351v1                         | 0.1 | 0 | 1 | 1 | 0   |
| GCA_016234585.1_ASM1623458v1                         | 0.4 | 0 | 1 | 0 | 0.5 |
| GCA_002350545.1_ASM235054v1                          | 1   | 1 | 0 | 0 | 0.5 |
| R0170300152_tooth_RA.megahit.bin.80                  | 0.8 | 0 | 1 | 0 | 0   |
| RSZYD18078615_A_saliva.metaspades.bin.32             | 1   | 0 | 0 | 0 | 1   |
| RDPYD18300405_A_saliva.metaspades.bin.82             | 0.6 | 0 | 1 | 0 | 0.5 |
| R0170300111_tooth_RA.megahit.bin.62                  | 0.8 | 0 | 1 | 0 | 0   |
| R0170300110_tooth_RA.megahit.bin.88                  | 1   | 0 | 0 | 0 | 1   |
| R0170300235_tooth_RAH.megahit.bin.27                 | 1   | 0 | 0 | 0 | 1   |
| GCA_017510705.1_ASM1751070v1                         | 1   | 1 | 0 | 0 | 1   |
| RSZAXPI002681-31_RA_saliva.metaspades.bin.57         | 1   | 0 | 1 | 0 | 0   |
| RSZAXPI002331-56_RAH_dental.metaspades.bin.43        | 0.8 | 0 | 1 | 0 | 0   |
| GCA_017406775.1_ASM1740677v1                         | 1   | 1 | 0 | 0 | 1   |
| RSZYD18078311_A_saliva.metaspades.bin.7              | 1   | 0 | 1 | 0 | 0   |

|                                                     |     |   |   |   |     |
|-----------------------------------------------------|-----|---|---|---|-----|
| SZAXPI018322-24_RA_dental.metaspades.bin.62         | 0.8 | 0 | 1 | 0 | 0   |
| YS000604_saliva.spades.bin.11                       | 1   | 0 | 1 | 0 | 0   |
| RSZYD18187142_A_saliva.metaspades.bin.22            | 0.9 | 0 | 1 | 0 | 0   |
| R0170300212_tooth_RA.megahit.bin.57                 | 1   | 0 | 1 | 0 | 0   |
| YS000385_saliva.spades.bin.1                        | 1   | 0 | 1 | 0 | 0   |
| GCA_017406905.1_ASM1740690v1                        | 1   | 1 | 0 | 0 | 0.5 |
| RSZAXPI002323-35_RAH_dental.metaspades.bin.28       | 0.6 | 0 | 1 | 0 | 0.5 |
| RSZAXPI002655-15_RA_dental.metaspades.bin.44        | 1   | 0 | 0 | 0 | 1   |
| RSZYD18187273_A_saliva.metaspades.bin.99            | 1   | 0 | 0 | 0 | 1   |
| GCA_946414345.1_SRR12081302_bin.4_metaWRAP_v1.3_MAG | 1   | 1 | 0 | 0 | 1   |
| YS000063_saliva.spades.bin.11                       | 1   | 0 | 1 | 0 | 0   |
| YS000758_saliva.spades.bin.5                        | 1   | 0 | 1 | 0 | 0   |
| GCA_027427035.1_ASM2742703v1                        | 0.6 | 0 | 1 | 1 | 0   |
| RSZAXPI002655-15_RA_dental.metaspades.bin.1         | 0.8 | 0 | 1 | 0 | 0   |
| RSZAXPI002626-66_RA_dental.metaspades.bin.71        | 0.8 | 0 | 1 | 0 | 0   |
| R0170300242_tooth_RAH.megahit.bin.95                | 0.9 | 0 | 1 | 0 | 0   |
| R0170300254_tooth_RAH.megahit.bin.128               | 0.4 | 0 | 1 | 0 | 0.5 |
| GCA_017405225.1_ASM1740522v1                        | 1   | 0 | 0 | 0 | 0.5 |
| GCA_017431745.1_ASM1743174v1                        | 1   | 1 | 0 | 0 | 0.5 |
| RDPYD18300175_A_saliva.metaspades.bin.54            | 1   | 0 | 0 | 0 | 1   |
| GCA_017652105.1_ASM1765210v1                        | 1   | 1 | 0 | 0 | 0.5 |
| GCA_017418275.1_ASM1741827v1                        | 1   | 0 | 0 | 0 | 1   |
| GCA_027426915.1_ASM2742691v1                        | 0.6 | 0 | 1 | 1 | 0   |
| RDPYD18088984_A_saliva.metaspades.bin.13            | 1   | 0 | 1 | 0 | 0   |
| SZAXPI018439-102_RA_saliva.metaspades.bin.34        | 1   | 0 | 0 | 0 | 1   |
| R0170300145_tooth_RA.megahit.bin.1                  | 1   | 0 | 1 | 0 | 0   |
| GCA_900555675.1_UMGS1848                            | 1   | 0 | 1 | 0 | 0   |
| RSZYD18078582_A_saliva.metaspades.bin.27            | 0.9 | 0 | 1 | 0 | 0   |
| R0170300257_tooth_RAH.megahit.bin.54                | 0.8 | 0 | 1 | 0 | 0   |
| SZAXPI018292-158_RA_dental.metaspades.bin.12        | 0.8 | 0 | 1 | 0 | 0   |
| GCA_017433855.1_ASM1743385v1                        | 1   | 1 | 0 | 0 | 1   |
| R0170300120_tooth_RA.megahit.bin.80                 | 1   | 0 | 0 | 0 | 1   |
| R0170300114_tooth_RA.megahit.bin.10                 | 1   | 0 | 0 | 0 | 1   |
| RSZAXPI002313-22_RAH_dental.metaspades.bin.34       | 1   | 0 | 0 | 0 | 1   |
| GCA_947425995.1_SRR19981123_bin.1_metawrap_v1.3_MAG | 1   | 0 | 0 | 0 | 0.5 |
| R0170300222_tooth_RA.megahit.bin.120                | 0.8 | 0 | 1 | 0 | 0   |
| RDPYD18300390_A_saliva.metaspades.bin.50            | 0.9 | 0 | 1 | 0 | 0   |
| R0170300068_tooth_RA.megahit.bin.89                 | 0.8 | 0 | 1 | 0 | 0   |
| RDPYD18093589_A_saliva.metaspades.bin.27            | 1   | 0 | 1 | 0 | 0   |
| RDPYD18088953_A_saliva.metaspades.bin.4             | 1   | 0 | 1 | 0 | 0   |
| R0170300067_tooth_RA.megahit.bin.54                 | 0.6 | 0 | 1 | 0 | 0.5 |
| SZAXPI018172-26_RA_dental.metaspades.bin.42         | 0.8 | 0 | 1 | 0 | 0   |
| RSZAXPI002479-169_2_RAH_saliva.metaspades.bin.78    | 1   | 0 | 0 | 0 | 1   |
| R0170300262_tooth_RAH.megahit.bin.134               | 0.8 | 0 | 1 | 0 | 0   |
| RSZAXPI002628-79_RA_dental.metaspades.bin.30        | 0.9 | 0 | 1 | 0 | 0   |
| R0170300230_tooth_RA.megahit.bin.36                 | 1   | 0 | 0 | 0 | 1   |
| R0170300121_tooth_RA.megahit.bin.4                  | 1   | 0 | 0 | 0 | 1   |
| RSZAXPI002606-27_RA_dental.metaspades.bin.28        | 1   | 0 | 0 | 0 | 1   |
| R0170300105_tooth_RA.megahit.bin.2                  | 1   | 0 | 0 | 0 | 1   |
| R0170300136_tooth_RA.megahit.bin.71                 | 1   | 0 | 0 | 0 | 1   |
| R0170300152_tooth_RA.megahit.bin.61                 | 1   | 0 | 0 | 0 | 1   |
| RSZYD18187707_A_saliva.metaspades.bin.80            | 1   | 0 | 0 | 0 | 1   |
| RSZYD18078217_A_saliva.metaspades.bin.95            | 1   | 0 | 0 | 0 | 1   |
| SZAXPI018317-19_RA_dental.metaspades.bin.31         | 1   | 0 | 1 | 0 | 0   |
| R0170300150_tooth_RA.megahit.bin.56                 | 0.8 | 0 | 1 | 0 | 0   |
| RSZAXPI002313-22_RAH_dental.metaspades.bin.87       | 1   | 0 | 0 | 0 | 1   |
| RSZYD18078749_A_saliva.metaspades.bin.36            | 1   | 0 | 1 | 0 | 0   |
| RSZYD18078768_A_saliva.metaspades.bin.28            | 0.7 | 0 | 1 | 0 | 0   |
| SZAXPI018278-93_RA_dental.metaspades.bin.39         | 1   | 0 | 0 | 0 | 1   |
| RDPYD18189960_A_saliva.metaspades.bin.21            | 1   | 0 | 0 | 0 | 1   |
| RSZYD18187023_A_saliva.metaspades.bin.32            | 1   | 0 | 0 | 0 | 0   |
| RSZYD18187823_A_saliva.metaspades.bin.19            | 1   | 0 | 1 | 0 | 0   |
| RDPYD18189879_A_saliva.metaspades.bin.66            | 1   | 0 | 1 | 0 | 0   |
| GCA_013316035.1_ASM1331603v1                        | 1   | 0 | 0 | 0 | 0.5 |
| GCA_003979185.1_ASM397918v1                         | 1   | 0 | 0 | 0 | 0.5 |
| GCA_017992295.1_ASM1799229v1                        | 0.7 | 1 | 1 | 0 | 0.5 |
| RSZAXPI002641-101_RA_dental.metaspades.bin.55       | 0.8 | 0 | 1 | 0 | 0   |
| R0170300223_tooth_RA.megahit.bin.44                 | 1   | 0 | 1 | 0 | 0   |
| SZAXPI018096-17_RA_dental.metaspades.bin.23         | 0.6 | 0 | 1 | 0 | 0.5 |
| RSZAXPI002308-17_RAH_dental.metaspades.bin.14       | 1   | 0 | 0 | 0 | 1   |
| R0170300285_tooth_RAH.megahit.bin.48                | 1   | 0 | 0 | 0 | 1   |
| RSZYD18078011_A_saliva.metaspades.bin.17            | 1   | 0 | 0 | 0 | 1   |
| R0170300313_tooth_RAH.megahit.bin.102               | 1   | 0 | 0 | 0 | 1   |
| RDPYD18300081_A_saliva.metaspades.bin.39            | 1   | 0 | 1 | 0 | 0   |
| GCA_947166125.1_SRR8387714_bin.9_metaWRAP_v1.3_MAG  | 1   | 1 | 0 | 0 | 1   |
| RSZYD18078620_A_saliva.metaspades.bin.29            | 1   | 0 | 1 | 0 | 0   |
| GCA_017432505.1_ASM1743250v1                        | 1   | 1 | 0 | 0 | 1   |
| R0170300106_tooth_RA.megahit.bin.44                 | 0.8 | 0 | 1 | 0 | 0   |

|                                                      |     |   |   |   |     |
|------------------------------------------------------|-----|---|---|---|-----|
| YS000226_saliva.spades.bin.6                         | 1   | 0 | 1 | 0 | 0   |
| R0170300323_tooth_RAH.megahit.bin.22                 | 1   | 0 | 0 | 0 | 1   |
| GCA_017447485.1_ASM1744748v1                         | 1   | 1 | 0 | 0 | 1   |
| SZAXPI018171-25_1_RA_dental.metaspades.bin.5         | 1   | 0 | 0 | 0 | 1   |
| RSZAXPI002632-89_RA_dental.metaspades.bin.17         | 1   | 0 | 0 | 0 | 1   |
| R0170300306_tooth_RAH.megahit.bin.130                | 0.8 | 0 | 1 | 0 | 0   |
| GCA_947304135.1_SRR10912535_bin.47_metaWRAP_v1.3_MAG | 1   | 1 | 0 | 0 | 1   |
| GCA_009777315.1_ASM977731v1                          | 0.8 | 0 | 0 | 0 | 1   |
| GCA_017406985.1_ASM1740698v1                         | 1   | 0 | 0 | 0 | 1   |
| GCA_947306055.1_SRR10912535_bin.62_metaWRAP_v1.3_MAG | 1   | 0 | 0 | 0 | 1   |
| R0170300200_tooth_RA.megahit.bin.49                  | 0.8 | 0 | 1 | 0 | 0   |
| GCA_017983775.1_ASM1798377v1                         | 0.6 | 0 | 1 | 0 | 0   |
| GCA_017432305.1_ASM1743230v1                         | 1   | 0 | 0 | 0 | 1   |
| RSZYD18187002_A_saliva.metaspades.bin.29             | 1   | 0 | 0 | 0 | 1   |
| RSZYD18187899_A_saliva.metaspades.bin.64             | 0.7 | 0 | 1 | 0 | 0   |
| GCA_017651125.1_ASM1765112v1                         | 0.8 | 1 | 0 | 0 | 1   |
| R0170300060_tooth_RA.megahit.bin.57                  | 0.3 | 0 | 1 | 0 | 0   |
| GCA_017431085.1_ASM1743108v1                         | 1   | 1 | 0 | 0 | 1   |
| GCA_017509895.1_ASM1750989v1                         | 1   | 1 | 0 | 0 | 1   |
| RSZAXPI002324-37_RAH_dental.metaspades.bin.77        | 0.8 | 0 | 1 | 0 | 0   |
| R0170300192_tooth_RA.megahit.bin.84                  | 0.8 | 0 | 1 | 0 | 0   |
| R0170300179_tooth_RA.megahit.bin.1                   | 0.8 | 0 | 0 | 0 | 0   |
| R0170300223_tooth_RA.megahit.bin.112                 | 0.8 | 0 | 1 | 0 | 0   |
| GCA_017404285.1_ASM1740428v1                         | 1   | 1 | 0 | 0 | 1   |
| GCA_017561575.1_ASM1756157v1                         | 0.8 | 1 | 0 | 0 | 1   |
| YS000532_saliva.spades.bin.18                        | 1   | 0 | 1 | 0 | 0   |
| R0170300249_tooth_RAH.megahit.bin.3                  | 0.8 | 0 | 1 | 0 | 0   |
| SZAXPI018322-24_RA_dental.metaspades.bin.11          | 1   | 0 | 0 | 0 | 1   |
| RSZYD18187312_A_saliva.metaspades.bin.49             | 1   | 0 | 1 | 0 | 0   |
| RDPYD18300388_A_saliva.metaspades.bin.27             | 1   | 0 | 1 | 0 | 0   |
| YS000927_saliva.spades.bin.50                        | 1   | 0 | 1 | 0 | 0   |
| R0170300162_tooth_RA.megahit.bin.20                  | 0.8 | 0 | 1 | 0 | 0   |
| GCA_017533605.1_ASM1753360v1                         | 1   | 1 | 0 | 0 | 1   |
| GCA_017480035.1_ASM1748003v1                         | 1   | 0 | 0 | 0 | 1   |
| R0170300239_tooth_RAH.megahit.bin.85                 | 1   | 0 | 0 | 0 | 1   |
| R0170300139_tooth_RA.megahit.bin.20                  | 1   | 0 | 0 | 0 | 1   |
| RSZAXPI002479-169_RAH_saliva.metaspades.bin.73       | 1   | 0 | 0 | 0 | 1   |
| GCA_017433185.1_ASM1743318v1                         | 1   | 1 | 0 | 0 | 1   |
| GCA_947385605.1_ERR6760111_bin.57_metawrap_v1.3_MAG  | 0.8 | 0 | 0 | 0 | 1   |
| R0170300098_tooth_RA.megahit.bin.34                  | 1   | 0 | 1 | 0 | 0   |
| R0170300061_tooth_RA.megahit.bin.113                 | 1   | 0 | 1 | 0 | 0   |
| R0170300219_tooth_RA.megahit.bin.1                   | 1   | 0 | 1 | 0 | 0   |
| SZAXPI018191-57_RA_dental.metaspades.bin.32          | 1   | 0 | 1 | 0 | 0   |
| GCA_017404795.1_ASM1740479v1                         | 0.7 | 1 | 0 | 0 | 0.5 |
| R0170300079_tooth_RA.megahit.bin.18                  | 0.8 | 0 | 0 | 0 | 1   |
| GCA_905373345.1_SRR9217464-mag-bin.7                 | 0.5 | 0 | 1 | 0 | 0   |
| R0170300202_tooth_RA.megahit.bin.34                  | 0.8 | 0 | 1 | 0 | 0   |
| RSZYD18078253_A_saliva.metaspades.bin.36             | 1   | 0 | 1 | 0 | 0   |
| SZAXPI018274-87_RA_dental.metaspades.bin.42          | 0.8 | 0 | 1 | 0 | 0   |
| R0170300235_tooth_RAH.megahit.bin.85                 | 1   | 0 | 1 | 0 | 0   |
| SZAXPI018320-22_RA_dental.metaspades.bin.29          | 1   | 0 | 1 | 0 | 0   |
| R0170300208_tooth_RA.megahit.bin.81                  | 1   | 0 | 1 | 0 | 0   |
| R0170300151_tooth_RA.megahit.bin.9                   | 1   | 0 | 1 | 0 | 0   |
| R0170300119_tooth_RA.megahit.bin.2                   | 1   | 0 | 1 | 0 | 0   |
| SZAXPI018101-22_RA_dental.metaspades.bin.8           | 1   | 0 | 1 | 0 | 0   |
| SZAXPI018317-19_RA_dental.metaspades.bin.70          | 1   | 0 | 1 | 0 | 0   |
| R0170300269_tooth_RAH.megahit.bin.29                 | 1   | 0 | 1 | 0 | 0   |
| R0170300278_tooth_RAH.megahit.bin.14                 | 1   | 0 | 1 | 0 | 0   |
| RSZAXPI002458-89_RAH_dental.metaspades.bin.78        | 1   | 0 | 1 | 0 | 0   |
| R0170300291_tooth_RAH.megahit.bin.82                 | 1   | 0 | 1 | 0 | 0   |
| RSZAXPI002324-37_RAH_dental.metaspades.bin.18        | 1   | 0 | 1 | 0 | 0   |
| GCA_017510925.1_ASM1751092v1                         | 1   | 1 | 0 | 0 | 0.5 |
| RSZYD18187650_A_saliva.metaspades.bin.9              | 1   | 0 | 1 | 0 | 0   |
| RSZAXPI002318-27_RAH_dental.metaspades.bin.53        | 1   | 0 | 0 | 0 | 1   |
| R0170300279_tooth_RAH.megahit.bin.3                  | 1   | 0 | 0 | 0 | 1   |
| RDPYD18300101_A_saliva.metaspades.bin.91             | 1   | 0 | 0 | 0 | 1   |
| SZAXPI018097-18_RA_dental.metaspades.bin.14          | 1   | 0 | 0 | 0 | 1   |
| R0170300136_tooth_RA.megahit.bin.73                  | 1   | 0 | 0 | 0 | 1   |
| R0170300206_tooth_RA.megahit.bin.2                   | 1   | 0 | 0 | 0 | 1   |
| R0170300277_tooth_RAH.megahit.bin.4                  | 1   | 0 | 0 | 0 | 1   |
| RSZAXPI002456-79_RAH_dental.metaspades.bin.7         | 1   | 0 | 0 | 0 | 1   |
| R0170300178_tooth_RA.megahit.bin.102                 | 1   | 0 | 0 | 0 | 1   |
| RSZYD18187144_A_saliva.metaspades.bin.68             | 1   | 0 | 0 | 0 | 1   |
| R0170300303_tooth_RAH.megahit.bin.49                 | 1   | 0 | 0 | 0 | 1   |
| R0170300327_tooth_RA.megahit.bin.5                   | 1   | 0 | 0 | 0 | 1   |
| R0170300254_tooth_RAH.megahit.bin.48                 | 1   | 0 | 0 | 0 | 1   |
| R0170300288_tooth_RAH.megahit.bin.22                 | 1   | 0 | 0 | 0 | 1   |
| RSZYD18078769_A_saliva.metaspades.bin.60             | 1   | 0 | 0 | 0 | 1   |



|                                                      |     |   |   |   |     |
|------------------------------------------------------|-----|---|---|---|-----|
| RSZYD18078148_A_saliva.metaspades.bin.14             | 1   | 0 | 0 | 0 | 1   |
| RSZAXPI002619-34_RA_dental.metaspades.bin.5          | 1   | 0 | 0 | 0 | 1   |
| RSZYD18078562_A_saliva.metaspades.bin.64             | 1   | 0 | 0 | 0 | 1   |
| R0170300252_tooth_RAH.megahit.bin.79                 | 1   | 0 | 0 | 0 | 1   |
| R0170300100_tooth_RA.megahit.bin.14                  | 1   | 0 | 0 | 0 | 1   |
| SZAXPI018282-108_RA_dental.metaspades.bin.67         | 1   | 0 | 0 | 0 | 1   |
| R0170300318_tooth_RAH.megahit.bin.131                | 0.8 | 0 | 1 | 0 | 0   |
| GCA_017511205.1_ASM1751120v1                         | 1   | 1 | 0 | 0 | 1   |
| YS000725_saliva.spades.bin.43                        | 1   | 0 | 1 | 0 | 0   |
| SRR8114048.metaspades.bin.17                         | 1   | 0 | 0 | 0 | 1   |
| R0170300193_tooth_RA.megahit.bin.67                  | 1   | 0 | 1 | 0 | 0   |
| R0170300224_tooth_RA.megahit.bin.94                  | 1   | 0 | 0 | 0 | 1   |
| R0170300231_tooth_RA.megahit.bin.16                  | 0.8 | 0 | 0 | 0 | 0.5 |
| GCA_009781895.1_ASM978189v1                          | 1   | 0 | 0 | 0 | 1   |
| RSZYD18187537_A_saliva.metaspades.bin.50             | 1   | 0 | 0 | 0 | 1   |
| RSZYD18078322_A_saliva.metaspades.bin.73             | 1   | 0 | 0 | 0 | 1   |
| R0170300311_tooth_RAH.megahit.bin.87                 | 0.8 | 0 | 1 | 0 | 0   |
| SZAXPI018312-14_RA_dental.metaspades.bin.43          | 1   | 0 | 1 | 0 | 0   |
| RDPYD18300127_A_saliva.metaspades.bin.55             | 1   | 0 | 0 | 0 | 0   |
| R0170300148_tooth_RA.megahit.bin.111                 | 1   | 0 | 0 | 0 | 1   |
| GCA_017514665.1_ASM1751466v1                         | 1   | 1 | 0 | 0 | 1   |
| RSZAXPI002315-24_RAH_dental.metaspades.bin.62        | 0.8 | 0 | 1 | 0 | 0   |
| GCA_947306835.1_SRR10912542_bin.23_metaWRAP_v1.3_MAG | 1   | 1 | 0 | 0 | 0.5 |
| SZAXPI018190-56_RA_dental.metaspades.bin.64          | 1   | 0 | 1 | 0 | 0   |
| SZAXPI018103-24_RA_dental.metaspades.bin.45          | 1   | 0 | 0 | 0 | 1   |
| R0170300274_tooth_RAH.megahit.bin.88                 | 1   | 0 | 0 | 0 | 1   |
| RDPYD18300091_A_saliva.metaspades.bin.39             | 1   | 0 | 0 | 0 | 0   |
| YS000607_saliva.spades.bin.9                         | 1   | 0 | 1 | 0 | 0   |
| SZAXPI018441-109_RA_saliva.metaspades.bin.47         | 0.8 | 0 | 1 | 0 | 0.5 |
| GCA_916439725.1_DRR214962_bin.20_metaWRAP_v1.1_MAG   | 0.8 | 0 | 0 | 0 | 0   |
| RDPYD18088975_A_saliva.metaspades.bin.3              | 1   | 0 | 0 | 0 | 0   |
| GCA_943350085.1_RH-15aug16-19                        | 0.6 | 0 | 1 | 0 | 0   |
| GCA_017460625.1_ASM1746062v1                         | 1   | 1 | 0 | 0 | 0.5 |
| RDPYD18201698_A_saliva.metaspades.bin.50             | 1   | 0 | 0 | 0 | 0   |
| GCA_017404725.1_ASM1740472v1                         | 0.8 | 0 | 0 | 0 | 0.5 |
| RDPYD18300271_A_saliva.metaspades.bin.13             | 0.8 | 0 | 1 | 0 | 0   |
| R0170300260_tooth_RAH.megahit.bin.14                 | 1   | 0 | 1 | 0 | 0   |
| RSZAXPI002619-34_RA_dental.metaspades.bin.16         | 1   | 0 | 1 | 0 | 0   |
| R0170300305_tooth_RAH.megahit.bin.21                 | 0.8 | 0 | 1 | 0 | 0   |
| R0170300205_tooth_RA.megahit.bin.8                   | 1   | 0 | 0 | 0 | 1   |
| GCA_027446965.1_ASM2744696v1                         | 0.4 | 0 | 1 | 1 | 0   |
| R0170300272_tooth_RAH.megahit.bin.68                 | 1   | 0 | 0 | 0 | 1   |
| SZAXPI018178-34_RA_dental.metaspades.bin.62          | 1   | 0 | 1 | 0 | 0   |
| R0170300271_tooth_RAH.megahit.bin.109                | 1   | 0 | 1 | 0 | 0   |
| R0170300194_tooth_RA.megahit.bin.108                 | 1   | 0 | 1 | 0 | 0   |
| RSZAXPI002319-31_RAH_dental.metaspades.bin.72        | 1   | 0 | 1 | 0 | 0   |
| RSZAXPI002326-41_RAH_dental.metaspades.bin.62        | 1   | 0 | 1 | 0 | 0   |
| SZAXPI018287-129_RA_dental.metaspades.bin.14         | 1   | 0 | 1 | 0 | 0   |
| SZAXPI018095-16_RA_dental.metaspades.bin.15          | 1   | 0 | 1 | 0 | 0   |
| R0170300217_tooth_RA.megahit.bin.134                 | 1   | 0 | 1 | 0 | 0   |
| R0170300161_tooth_RA.megahit.bin.41                  | 1   | 0 | 1 | 0 | 0   |
| SZAXPI018313-15_RA_dental.metaspades.bin.16          | 1   | 0 | 1 | 0 | 0   |
| SZAXPI018103-24_RA_dental.metaspades.bin.59          | 1   | 0 | 1 | 0 | 0   |
| R0170300207_tooth_RA.megahit.bin.21                  | 1   | 0 | 1 | 0 | 0   |
| SZAXPI018096-17_RA_dental.metaspades.bin.59          | 1   | 0 | 1 | 0 | 0   |
| R0170300169_tooth_RA.megahit.bin.51                  | 1   | 0 | 1 | 0 | 0   |
| R0170300170_tooth_RA.megahit.bin.97                  | 1   | 0 | 1 | 0 | 0   |
| RSZAXPI002606-27_RA_dental.metaspades.bin.59         | 1   | 0 | 1 | 0 | 0   |
| R0170300266_tooth_RAH.megahit.bin.13                 | 1   | 0 | 1 | 0 | 0   |
| R0170300211_tooth_RA.megahit.bin.23                  | 1   | 0 | 1 | 0 | 0   |
| SZAXPI018178-34_RA_dental.metaspades.bin.15          | 1   | 0 | 0 | 0 | 1   |
| RSZYD18078695_A_saliva.metaspades.bin.25             | 1   | 0 | 0 | 0 | 1   |
| R0170300055_tooth_RA.megahit.bin.35                  | 1   | 0 | 0 | 0 | 1   |
| R0170300162_tooth_RA.megahit.bin.89                  | 1   | 0 | 0 | 0 | 1   |
| R0170300281_tooth_RAH.megahit.bin.27                 | 1   | 0 | 0 | 0 | 1   |
| SZAXPI018286-123_RA_dental.metaspades.bin.16         | 1   | 0 | 0 | 0 | 1   |
| R0170300264_tooth_RAH.megahit.bin.17                 | 1   | 0 | 0 | 0 | 1   |
| R0170300223_tooth_RA.megahit.bin.25                  | 1   | 0 | 0 | 0 | 1   |
| R0170300135_tooth_RA.megahit.bin.70                  | 1   | 0 | 0 | 0 | 1   |
| YS000527_saliva.spades.bin.34                        | 1   | 0 | 1 | 0 | 0   |
| SZAXPI018287-129_RA_dental.metaspades.bin.69         | 0.8 | 0 | 1 | 0 | 0   |
| GCA_946407955.1_SRR12081294_bin.80_metaWRAP_v1.3_MAG | 1   | 0 | 0 | 0 | 1   |
| YS000299_saliva.spades.bin.16                        | 0.9 | 0 | 1 | 0 | 0   |
| GCA_017545595.1_ASM1754559v1                         | 1   | 0 | 0 | 0 | 0.5 |
| R0170300258_tooth_RAH.megahit.bin.9                  | 1   | 0 | 0 | 0 | 1   |
| RSZAXPI002657-17_RA_dental.metaspades.bin.13         | 1   | 0 | 1 | 0 | 0   |
| YS000331_saliva.spades.bin.6                         | 0.8 | 0 | 1 | 0 | 0   |
| RSZAXPI002636-95_RA_dental.metaspades.bin.34         | 0.6 | 0 | 1 | 0 | 0.5 |

|                                                      |     |   |   |   |     |
|------------------------------------------------------|-----|---|---|---|-----|
| R0170300313_tooth_RAH.megahit.bin.7                  | 1   | 0 | 0 | 0 | 1   |
| R0170300110_tooth_RA.megahit.bin.53                  | 0.6 | 0 | 0 | 0 | 0.5 |
| RDPYD18201791_A_saliva.metaspades.bin.75             | 1   | 0 | 0 | 0 | 0   |
| RDPYD18097572_A_saliva.metaspades.bin.15             | 1   | 0 | 0 | 0 | 0   |
| R0170300129_tooth_RA.megahit.bin.41                  | 1   | 0 | 0 | 0 | 1   |
| R0170300208_tooth_RA.megahit.bin.25                  | 0.9 | 0 | 0 | 0 | 0   |
| GCA_002371235.1_ASM237123v1                          | 1   | 1 | 0 | 0 | 0.5 |
| GCA_900555425.1_UMGS1831                             | 0.5 | 0 | 1 | 0 | 0   |
| R0170300170_tooth_RA.megahit.bin.1                   | 0.3 | 0 | 1 | 0 | 0   |
| GCA_017432365.1_ASM1743236v1                         | 1   | 0 | 0 | 0 | 0   |
| GCA_017524405.1_ASM1752440v1                         | 0.8 | 0 | 0 | 0 | 1   |
| RDPYD18300407_A_saliva.metaspades.bin.4              | 0.9 | 0 | 1 | 0 | 0   |
| RSZYD18078461_A_saliva.metaspades.bin.53             | 0.5 | 0 | 1 | 0 | 0   |
| SRR8114056.metaspades.bin.5                          | 1   | 0 | 0 | 0 | 1   |
| RSZYD18078571_A_saliva.metaspades.bin.52             | 0.4 | 0 | 1 | 0 | 0   |
| RSZYD18078736_A_saliva.metaspades.bin.17             | 1   | 0 | 0 | 0 | 1   |
| R0170300223_tooth_RA.megahit.bin.10                  | 1   | 0 | 0 | 0 | 1   |
| GCA_947364605.1_SRR16350204_bin.1_metawrap_v1.3_MAG  | 0.8 | 0 | 0 | 0 | 0.5 |
| GCA_946479115.1_ERR5385026_bin.7_metawrap_v1.3.0_MAG | 0.6 | 0 | 1 | 1 | 0   |
| RSZYD18078595_A_saliva.metaspades.bin.65             | 1   | 0 | 1 | 0 | 0   |
| R0170300056_tooth_RA.megahit.bin.105                 | 0.8 | 0 | 0 | 0 | 1   |
| GCA_017407085.1_ASM1740708v1                         | 1   | 1 | 0 | 0 | 1   |
| SZAXPI018406-56_RA_saliva.metaspades.bin.71          | 1   | 1 | 0 | 0 | 0.5 |
| R0170300300_tooth_RAH.megahit.bin.1                  | 1   | 0 | 1 | 0 | 0   |
| R0170300270_tooth_RAH.megahit.bin.51                 | 1   | 0 | 1 | 0 | 0   |
| R0170300118_tooth_RA.megahit.bin.74                  | 1   | 0 | 1 | 0 | 0   |
| R0170300303_tooth_RAH.megahit.bin.161                | 1   | 0 | 1 | 0 | 0   |
| RDPYD18088805_A_saliva.metaspades.bin.25             | 1   | 0 | 0 | 0 | 0   |
| R0170300141_tooth_RA.megahit.bin.72                  | 1   | 0 | 0 | 0 | 0   |
| GCA_017510905.1_ASM1751090v1                         | 1   | 1 | 0 | 0 | 0.5 |
| RSZYD18187848_A_saliva.metaspades.bin.3              | 1   | 0 | 1 | 0 | 0   |
| RSZYD18078756_A_saliva.metaspades.bin.24             | 1   | 0 | 0 | 0 | 1   |
| R0170300249_tooth_RAH.megahit.bin.103                | 1   | 0 | 0 | 0 | 1   |
| R0170300252_tooth_RAH.megahit.bin.46                 | 1   | 0 | 1 | 0 | 0   |
| RSZYD18187735_A_saliva.metaspades.bin.54             | 0.7 | 0 | 1 | 0 | 0   |
| GCA_946404095.1_SRR12081303_bin.66_metaWRAP_v1.3_MAG | 1   | 1 | 0 | 0 | 1   |
| RSZYD18187438_A_saliva.metaspades.bin.51             | 0.8 | 0 | 0 | 0 | 0   |
| RSZYD18078482_A_saliva.metaspades.bin.17             | 1   | 0 | 0 | 0 | 0   |
| R0170300154_tooth_RA.megahit.bin.116                 | 0.8 | 0 | 1 | 0 | 0   |
| R0170300061_tooth_RA.megahit.bin.12                  | 0.6 | 0 | 1 | 0 | 0.5 |
| RDPYD18098896_A_saliva.metaspades.bin.29             | 1   | 0 | 0 | 0 | 1   |
| RSZYD18187790_A_saliva.metaspades.bin.2              | 1   | 0 | 0 | 0 | 1   |
| GCA_017430725.1_ASM1743072v1                         | 1   | 1 | 0 | 0 | 1   |
| RDPYD18300091_A_saliva.metaspades.bin.68             | 1   | 0 | 0 | 0 | 1   |
| GCA_017514805.1_ASM1751480v1                         | 1   | 0 | 0 | 0 | 1   |
| RSZAXPI002603-21_RA_dental.metaspades.bin.63         | 1   | 0 | 0 | 0 | 1   |
| R0170300119_tooth_RA.megahit.bin.12                  | 0.8 | 0 | 0 | 0 | 0   |
| GCA_946890795.1_SRR12830924_bin.6_metaWRAP_v1.3_MAG  | 1   | 1 | 0 | 0 | 0.5 |
| RSZAXPI002635-94_RA_dental.metaspades.bin.41         | 0.8 | 0 | 0 | 0 | 0   |
| R0170300302_tooth_RAH.megahit.bin.114                | 1   | 0 | 0 | 0 | 1   |
| RDPYD18189966_A_saliva.metaspades.bin.40             | 1   | 0 | 0 | 0 | 1   |
| YS000381_saliva.spades.bin.25                        | 0.9 | 0 | 1 | 0 | 0   |
| R0170300301_tooth_RAH.megahit.bin.77                 | 0.8 | 0 | 1 | 0 | 0   |
| RSZYD18187613_A_saliva.metaspades.bin.34             | 1   | 0 | 1 | 0 | 0   |
| R0170300292_tooth_RAH.megahit.bin.27                 | 1   | 0 | 1 | 0 | 0   |
| SZAXPI018391-27_RA_saliva.metaspades.bin.47          | 1   | 0 | 0 | 0 | 1   |
| YS000608_saliva.spades.bin.2                         | 1   | 0 | 1 | 0 | 0   |
| RSZYD18078259_A_saliva.metaspades.bin.16             | 1   | 0 | 1 | 0 | 0   |
| RDPYD18098341_A_saliva.metaspades.bin.33             | 0.9 | 0 | 1 | 0 | 0   |
| R0170300287_tooth_RAH.megahit.bin.57                 | 1   | 0 | 1 | 0 | 0   |
| RDPYD18097649_A_saliva.metaspades.bin.16             | 1   | 0 | 0 | 0 | 1   |
| RDPYD18088979_A_saliva.metaspades.bin.8              | 1   | 0 | 0 | 0 | 1   |
| R0170300290_tooth_RAH.megahit.bin.111                | 0.8 | 0 | 1 | 0 | 0   |
| R0170300181_tooth_RA.megahit.bin.96                  | 1   | 0 | 0 | 0 | 1   |
| R0170300079_tooth_RA.megahit.bin.12                  | 1   | 0 | 1 | 0 | 0   |
| SZAXPI018273-75_RA_dental.metaspades.bin.34          | 1   | 0 | 0 | 0 | 1   |
| YS000541_saliva.spades.bin.2                         | 0.8 | 0 | 1 | 0 | 0   |
| R0170300105_tooth_RA.megahit.bin.100                 | 1   | 0 | 1 | 0 | 0   |
| R0170300239_tooth_RAH.megahit.bin.64                 | 1   | 0 | 1 | 0 | 0   |
| R0170300120_tooth_RA.megahit.bin.14                  | 1   | 0 | 1 | 0 | 0   |
| GCA_947253565.1_SRR17635649_bin.4_metaWRAP_v1.3_MAG  | 1   | 1 | 0 | 0 | 0.5 |
| GCA_946997535.1_SRR16916865_bin.12_metaWRAP_v1.3_MAG | 1   | 1 | 0 | 0 | 0.5 |
| GCA_017516075.1_ASM1751607v1                         | 0.7 | 1 | 0 | 0 | 1   |
| RDPYD18098858_A_saliva.metaspades.bin.23             | 0.7 | 0 | 1 | 0 | 0   |
| RDPYD18189844_A_saliva.metaspades.bin.3              | 1   | 0 | 1 | 0 | 0   |
| GCA_017512085.1_ASM1751208v1                         | 1   | 1 | 0 | 0 | 0.5 |
| GCA_946626365.1_SRR873609_bin.132_metaWRAP_v1.3_MAG  | 0.8 | 1 | 0 | 0 | 0.5 |
| RDPYD18300089_A_saliva.metaspades.bin.34             | 0.7 | 0 | 1 | 0 | 0   |

|                                                       |     |   |   |   |     |
|-------------------------------------------------------|-----|---|---|---|-----|
| R0170300184_tooth_RA.megahit.bin.85                   | 1   | 0 | 0 | 0 | 1   |
| GCA_017511965.1_ASM1751196v1                          | 1   | 1 | 0 | 0 | 1   |
| GCA_017459765.1_ASM1745976v1                          | 1   | 1 | 0 | 0 | 1   |
| GCA_017460105.1_ASM1746010v1                          | 0.6 | 1 | 0 | 0 | 0.5 |
| R0170300323_tooth_RAH.megahit.bin.16                  | 1   | 0 | 1 | 0 | 0   |
| R0170300148_tooth_RA.megahit.bin.83                   | 1   | 0 | 1 | 0 | 0   |
| GCA_947253235.1_SRR17635697_bin.12_metaWRAP_v1.3_MAG  | 1   | 1 | 0 | 0 | 0.5 |
| GCA_947253955.1_SRR17635595_bin.5_metaWRAP_v1.3_MAG   | 1   | 1 | 0 | 0 | 0.5 |
| GCA_947253945.1_SRR17635701_bin.9_metaWRAP_v1.3_MAG   | 1   | 1 | 0 | 0 | 0.5 |
| RSZYD18078100_A_saliva.metaspades.bin.89              | 1   | 0 | 0 | 0 | 1   |
| GCA_009691435.1_ASM969143v1                           | 0.6 | 0 | 1 | 0 | 0   |
| YS000131_saliva.spades.bin.17                         | 1   | 0 | 1 | 0 | 0   |
| GCA_013333575.2_ASM1333357v2                          | 0.3 | 0 | 1 | 0 | 0   |
| SZAXPI018182-39_RA_dental.metaspades.bin.37           | 0.8 | 0 | 0 | 0 | 0   |
| GCA_017962365.1_ASM1796236v1                          | 1   | 1 | 0 | 0 | 1   |
| R0170300192_tooth_RA.megahit.bin.38                   | 1   | 0 | 0 | 0 | 1   |
| GCA_903836325.1_freshwater_MAG_---_KR2_bin-0178       | 0.6 | 0 | 1 | 0 | 0   |
| R0170300294_tooth_RAH.megahit.bin.42                  | 1   | 0 | 1 | 0 | 0   |
| GCA_013333205.2_ASM1333320v2                          | 1   | 0 | 0 | 0 | 1   |
| YS000290_saliva.spades.bin.16                         | 0.6 | 0 | 1 | 0 | 0   |
| R0170300078_tooth_RA.megahit.bin.29                   | 1   | 0 | 0 | 0 | 1   |
| GCA_027340655.1_ASM2734065v1                          | 0.6 | 0 | 1 | 1 | 0.5 |
| GCA_017420225.1_ASM1742022v1                          | 1   | 1 | 0 | 0 | 1   |
| RDPYD18201627_A_saliva.metaspades.bin.4               | 0.6 | 0 | 1 | 0 | 0   |
| GCA_903847695.1_freshwater_MAG_---_YR_bin-4361        | 0.6 | 0 | 1 | 0 | 0   |
| GCA_945873065.1_SRR15732359_bin.18_metaWRAP_v1.3_MAG  | 0.6 | 1 | 1 | 0 | 0.5 |
| R0170300294_tooth_RAH.megahit.bin.112                 | 1   | 0 | 0 | 0 | 1   |
| R0170300318_tooth_RAH.megahit.bin.108                 | 1   | 0 | 0 | 0 | 1   |
| YS000922_saliva.spades.bin.6                          | 1   | 0 | 1 | 0 | 0   |
| R0170300055_tooth_RA.megahit.bin.26                   | 1   | 0 | 1 | 0 | 0   |
| R0170300271_tooth_RAH.megahit.bin.16                  | 1   | 0 | 0 | 0 | 1   |
| SZAXPI011699-166_RA_dental.metaspades.bin.58          | 1   | 0 | 0 | 0 | 1   |
| SZAXPI018286-123_RA_dental.metaspades.bin.45          | 0.8 | 0 | 0 | 0 | 0   |
| GCA_946479835.1_SRR15094062_bin.4_metawrap_v1.3.0_MAG | 0.4 | 0 | 1 | 1 | 0   |
| RSZYD18187119_A_saliva.metaspades.bin.9               | 1   | 0 | 0 | 0 | 0   |
| GCA_947307355.1_SRR10912536_bin.13_metaWRAP_v1.3_MAG  | 1   | 1 | 0 | 0 | 0.5 |
| SZAXPI018394-33_RA_saliva.metaspades.bin.17           | 1   | 0 | 0 | 0 | 1   |
| R0170300161_tooth_RA.megahit.bin.150                  | 1   | 0 | 0 | 0 | 1   |
| RSZYD18078245_A_saliva.metaspades.bin.14              | 1   | 0 | 1 | 0 | 0   |
| R0170300075_tooth_RA.megahit.bin.36                   | 0.8 | 0 | 0 | 0 | 0   |
| R0170300284_tooth_RAH.megahit.bin.22                  | 0.9 | 0 | 1 | 0 | 0   |
| R0170300146_tooth_RA.megahit.bin.30                   | 1   | 0 | 0 | 0 | 1   |
| RSZYD18078325_A_saliva.metaspades.bin.95              | 1   | 0 | 0 | 0 | 1   |
| GCA_013333415.2_ASM1333341v2                          | 1   | 0 | 0 | 0 | 1   |
| GCA_017510025.1_ASM1751002v1                          | 1   | 1 | 0 | 0 | 1   |
| GCA_946998385.1_SRR16916860_bin.6_metaWRAP_v1.3_MAG   | 1   | 1 | 0 | 0 | 0.5 |
| RSZAXPI002314-23_RAH_dental.metaspades.bin.51         | 0.8 | 0 | 1 | 0 | 0   |
| RSZYD18187261_A_saliva.metaspades.bin.68              | 1   | 0 | 0 | 0 | 0.5 |
| SZAXPI018323-25_RA_dental.metaspades.bin.25           | 1   | 0 | 0 | 0 | 1   |
| R0170300161_tooth_RA.megahit.bin.158                  | 1   | 0 | 0 | 0 | 1   |
| RSZYD18187503_A_saliva.metaspades.bin.53              | 1   | 0 | 0 | 0 | 1   |
| RDPYD18300081_A_saliva.metaspades.bin.28              | 1   | 0 | 0 | 0 | 1   |
| RSZAXPI002331-56_RAH_dental.metaspades.bin.80         | 0.8 | 0 | 0 | 0 | 0   |
| R0170300338_saliva_RA.megahit.bin.56                  | 0.8 | 0 | 1 | 0 | 0   |
| R0170300211_tooth_RA.megahit.bin.13                   | 1   | 0 | 0 | 0 | 1   |
| GCA_004136275.1_ASM413627v1                           | 1   | 1 | 0 | 0 | 0.5 |
| GCA_946890675.1_ERR9530663_bin.14_metaWRAP_v1.3_MAG   | 1   | 1 | 0 | 0 | 0.5 |
| RSZYD18078760_A_saliva.metaspades.bin.11              | 1   | 0 | 0 | 0 | 0   |
| RDPYD18097506_A_saliva.metaspades.bin.46              | 1   | 0 | 0 | 0 | 0   |
| RSZYD18078582_A_saliva.metaspades.bin.58              | 1   | 0 | 0 | 0 | 1   |
| RSZYD18078188_A_saliva.metaspades.bin.16              | 0.9 | 0 | 1 | 0 | 0   |
| SZAXPI018310-169_RA_dental.metaspades.bin.1           | 0.8 | 0 | 0 | 0 | 0   |
| RSZYD18078579_A_saliva.metaspades.bin.26              | 1   | 0 | 0 | 0 | 0   |
| R0170300146_tooth_RA.megahit.bin.21                   | 1   | 0 | 1 | 0 | 0   |
| GCA_013333155.2_ASM1333315v2                          | 1   | 0 | 0 | 0 | 1   |
| RSZYD18187115_A_saliva.metaspades.bin.47              | 1   | 0 | 0 | 0 | 1   |
| GCA_946890805.1_SRR12830918_bin.6_metaWRAP_v1.3_MAG   | 1   | 1 | 0 | 0 | 0.5 |
| GCA_947366635.1_SRR15322614_bin.1_metawrap_v1.3_MAG   | 0.8 | 0 | 0 | 0 | 0.5 |
| RSZYD18078115_A_saliva.metaspades.bin.40              | 1   | 0 | 0 | 0 | 1   |
| GCA_017515265.1_ASM1751526v1                          | 1   | 1 | 0 | 0 | 0.5 |
| RSZAXPI002314-23_RAH_dental.metaspades.bin.46         | 0.8 | 0 | 0 | 0 | 0   |
| RSZYD18187234_A_saliva.metaspades.bin.82              | 0.9 | 0 | 0 | 0 | 1   |
| GCA_947090635.1_SRR11749285_bin.3_metaWRAP_v1.3_MAG   | 1   | 1 | 0 | 0 | 0   |
| YS000632_saliva.spades.bin.35                         | 1   | 0 | 1 | 0 | 0   |
| RSZYD18078167_A_saliva.metaspades.bin.4               | 1   | 0 | 1 | 0 | 0   |
| GCA_946405975.1_SRR12081303_bin.106_metaWRAP_v1.3_MAG | 1   | 1 | 0 | 0 | 1   |
| RSZYD18187350_A_saliva.metaspades.bin.64              | 0.8 | 0 | 0 | 0 | 1   |
| R0170300233_tooth_RA.megahit.bin.80                   | 1   | 0 | 0 | 0 | 1   |



|                                                      |     |   |   |   |     |
|------------------------------------------------------|-----|---|---|---|-----|
| GCA_946404545.1_SRR12081298_bin.7_metaWRAP_v1.3_MAG  | 1   | 0 | 0 | 0 | 1   |
| GCA_947304155.1_SRR10912535_bin.54_metaWRAP_v1.3_MAG | 0.9 | 0 | 0 | 0 | 1   |
| R0170300135_tooth_RA.megahit.bin.76                  | 0.3 | 0 | 1 | 0 | 0   |
| GCA_017514675.1_ASM1751467v1                         | 0.8 | 1 | 0 | 0 | 0.5 |
| R0170300213_tooth_RA.megahit.bin.4                   | 1   | 0 | 1 | 0 | 0   |
| YS000027_saliva.spades.bin.12                        | 0.8 | 0 | 1 | 0 | 0   |
| R0170300136_tooth_RA.megahit.bin.20                  | 1   | 0 | 1 | 0 | 0   |
| R0170300176_tooth_RA.megahit.bin.28                  | 1   | 0 | 0 | 0 | 1   |
| RSZYD18078115_A_saliva.metaspades.bin.19             | 1   | 0 | 0 | 0 | 1   |
| GCA_004151455.1_ASM415145v1                          | 1   | 0 | 0 | 0 | 0   |
| RSZYD18187216_A_saliva.metaspades.bin.13             | 1   | 0 | 0 | 0 | 0   |
| R0170300292_tooth_RAH.megahit.bin.19                 | 1   | 0 | 0 | 0 | 0.5 |
| R0170300111_tooth_RA.megahit.bin.32                  | 0.5 | 0 | 0 | 0 | 1   |
| RDPYD18097607_A_saliva.metaspades.bin.40             | 1   | 0 | 0 | 0 | 0   |
| RDPYD18098844_A_saliva.metaspades.bin.18             | 1   | 0 | 0 | 0 | 0   |
| RSZAXPI002470-105_RAH_saliva.metaspades.bin.10       | 1   | 0 | 0 | 0 | 0   |
| RSZAXPI002470-105_2_RAH_saliva.metaspades.bin.33     | 1   | 0 | 0 | 0 | 0   |
| RSZYD18078749_A_saliva.metaspades.bin.35             | 1   | 0 | 0 | 0 | 0   |
| R0170300378_saliva_RAH.megahit.bin.43                | 1   | 0 | 0 | 0 | 0   |
| GCA_947302975.1_SRR10912535_bin.55_metaWRAP_v1.3_MAG | 1   | 1 | 0 | 0 | 0.5 |
| R0170300190_tooth_RA.megahit.bin.12                  | 0.8 | 0 | 1 | 0 | 0   |
| RDPYD18300323_A_saliva.metaspades.bin.46             | 1   | 0 | 0 | 0 | 0   |
| R0170300152_tooth_RA.megahit.bin.50                  | 1   | 0 | 1 | 0 | 0   |
| YS000921_saliva.spades.bin.23                        | 0.7 | 0 | 1 | 0 | 0   |
| R0170300236_tooth_RAH.megahit.bin.77                 | 1   | 0 | 1 | 0 | 0   |
| SZAXPI018275-88_RA_dental.metaspades.bin.50          | 1   | 0 | 1 | 0 | 0   |
| R0170300287_tooth_RAH.megahit.bin.150                | 1   | 0 | 0 | 0 | 1   |
| R0170300257_tooth_RAH.megahit.bin.13                 | 1   | 0 | 1 | 0 | 0   |
| RDPYD18201709_A_saliva.metaspades.bin.24             | 0.6 | 0 | 1 | 0 | 0   |
| R0170300065_tooth_RA.megahit.bin.79                  | 0.8 | 0 | 0 | 0 | 0   |
| GCA_003022365.1_ASM302236v1                          | 0.6 | 0 | 1 | 0 | 0   |
| RDPYD18098980_A_saliva.metaspades.bin.28             | 1   | 0 | 0 | 0 | 0   |
| RSZAXPI002305-14_RAH_dental.metaspades.bin.61        | 0.8 | 0 | 0 | 0 | 0   |
| GCA_017404685.1_ASM1740468v1                         | 1   | 1 | 0 | 0 | 1   |
| RSZYD18187652_A_saliva.metaspades.bin.2              | 0.8 | 0 | 0 | 0 | 1   |
| R0170300067_tooth_RA.megahit.bin.1                   | 0.8 | 0 | 1 | 0 | 0   |
| RDPYD18098585_A_saliva.metaspades.bin.25             | 1   | 0 | 0 | 0 | 1   |
| RDPYD18300134_A_saliva.metaspades.bin.113            | 1   | 0 | 0 | 0 | 0   |
| R0170300241_tooth_RAH.megahit.bin.28                 | 0.4 | 0 | 1 | 0 | 0.5 |
| GCA_017404485.1_ASM1740448v1                         | 1   | 1 | 0 | 0 | 1   |
| RDPYD18300101_A_saliva.metaspades.bin.92             | 1   | 0 | 0 | 0 | 1   |
| RSZYD18187503_A_saliva.metaspades.bin.19             | 1   | 0 | 0 | 0 | 1   |
| GCA_017432705.1_ASM1743270v1                         | 1   | 0 | 0 | 0 | 1   |
| GCA_010014525.1_ASM1001452v1                         | 1   | 0 | 0 | 0 | 0   |
| GCA_017511645.1_ASM1751164v1                         | 0.5 | 1 | 0 | 0 | 1   |
| RSZYD18187379_A_saliva.metaspades.bin.62             | 0.9 | 0 | 1 | 0 | 0   |
| GCA_002309075.1_ASM230907v1                          | 1   | 1 | 0 | 0 | 1   |
| RDPYD18098888_A_saliva.metaspades.bin.8              | 1   | 0 | 0 | 0 | 0   |
| RDPYD18300323_A_saliva.metaspades.bin.59             | 1   | 0 | 0 | 0 | 0   |
| RSZYD18187311_A_saliva.metaspades.bin.30             | 1   | 0 | 0 | 0 | 0   |
| RDPYD18098496_A_saliva.metaspades.bin.7              | 1   | 0 | 0 | 0 | 0   |
| RDPYD18201957_A_saliva.metaspades.bin.16             | 1   | 0 | 0 | 0 | 0   |
| RSZYD18187756_A_saliva.metaspades.bin.35             | 1   | 0 | 0 | 0 | 0   |
| GCA_017512925.1_ASM1751292v1                         | 1   | 0 | 0 | 0 | 1   |
| RDPYD18201938_A_saliva.metaspades.bin.59             | 1   | 0 | 0 | 0 | 0   |
| RSZYD18187458_A_saliva.metaspades.bin.36             | 1   | 0 | 0 | 0 | 0   |
| RSZYD18078234_A_saliva.metaspades.bin.10             | 1   | 0 | 0 | 0 | 0   |
| RDPYD18098326_A_saliva.metaspades.bin.7              | 1   | 0 | 0 | 0 | 0   |
| RSZYD18078088_A_saliva.metaspades.bin.16             | 1   | 0 | 0 | 0 | 0   |
| GCA_947426085.1_SRR18439536_bin.4_metawrap_v1.3_MAG  | 1   | 0 | 0 | 0 | 0.5 |
| GCA_027427875.1_ASM2742787v1                         | 0.2 | 0 | 1 | 1 | 0   |
| RSZYD18187739_A_saliva.metaspades.bin.22             | 1   | 0 | 0 | 0 | 0.5 |
| R0170300208_tooth_RA.megahit.bin.27                  | 1   | 0 | 0 | 0 | 0.5 |
| YS000298_saliva.spades.bin.49                        | 0.3 | 0 | 1 | 0 | 0   |
| SZAXPI018312-14_RA_dental.metaspades.bin.67          | 1   | 0 | 0 | 0 | 1   |
| RDPYD18088951_A_saliva.metaspades.bin.87             | 0.8 | 0 | 0 | 0 | 1   |
| RDPYD18300183_A_saliva.metaspades.bin.81             | 0.8 | 0 | 0 | 0 | 1   |
| RSZAXPI002330-47_RAH_dental.metaspades.bin.26        | 0.8 | 0 | 1 | 0 | 0.5 |
| R0170300051_tooth_RA.megahit.bin.6                   | 1   | 0 | 0 | 0 | 1   |
| R0170300294_tooth_RAH.megahit.bin.12                 | 1   | 0 | 0 | 0 | 1   |
| RSZYD18187492_A_saliva.metaspades.bin.15             | 1   | 0 | 0 | 0 | 1   |
| R0170300223_tooth_RA.megahit.bin.80                  | 0.9 | 0 | 0 | 0 | 1   |
| GCA_017433845.1_ASM1743384v1                         | 1   | 0 | 0 | 0 | 1   |
| RDPYD18101880_A_saliva.metaspades.bin.11             | 0.8 | 0 | 0 | 0 | 1   |
| RSZYD18078798_A_saliva.metaspades.bin.24             | 1   | 0 | 0 | 0 | 1   |
| GCA_017510075.1_ASM1751007v1                         | 1   | 1 | 0 | 0 | 0.5 |
| RSZYD18078590_A_saliva.metaspades.bin.50             | 1   | 0 | 0 | 0 | 0   |
| GCA_002699225.1_ASM269922v1                          | 0.5 | 0 | 1 | 0 | 0   |

|                                                      |     |   |   |   |     |
|------------------------------------------------------|-----|---|---|---|-----|
| GCA_017510205.1_ASM1751020v1                         | 1   | 1 | 0 | 0 | 1   |
| GCA_017460165.1_ASM1746016v1                         | 1   | 0 | 0 | 0 | 0.5 |
| GCA_017512095.1_ASM1751209v1                         | 0.8 | 1 | 0 | 0 | 0   |
| RDPYD18201616_A_saliva.metaspades.bin.6              | 1   | 0 | 0 | 0 | 0   |
| SZAXPI018359-24_RA_saliva.metaspades.bin.78          | 1   | 0 | 0 | 0 | 0   |
| RDPYD18098470_A_saliva.metaspades.bin.42             | 1   | 0 | 0 | 0 | 0   |
| RSZYD18078622_A_saliva.metaspades.bin.17             | 1   | 0 | 0 | 0 | 0   |
| RDPYD18189905_A_saliva.metaspades.bin.29             | 1   | 0 | 0 | 0 | 0   |
| RDPYD18098299_A_saliva.metaspades.bin.46             | 1   | 0 | 0 | 0 | 0   |
| RSZYD18078674_A_saliva.metaspades.bin.36             | 1   | 0 | 0 | 0 | 0   |
| RSZYD18078463_A_saliva.metaspades.bin.4              | 1   | 0 | 0 | 0 | 0   |
| RDPYD18201683_A_saliva.metaspades.bin.7              | 1   | 0 | 0 | 0 | 0   |
| SZAXPI018484-16_RA_saliva.metaspades.bin.36          | 0.8 | 0 | 0 | 0 | 0   |
| RSZYD18187340_A_saliva.metaspades.bin.39             | 1   | 0 | 1 | 0 | 0   |
| RDPYD18300261_A_saliva.metaspades.bin.29             | 0.5 | 0 | 1 | 0 | 0   |
| R0170300392_saliva_RAH.megahit.bin.14                | 1   | 0 | 0 | 0 | 1   |
| GCA_002313515.1_ASM231351v1                          | 1   | 1 | 0 | 0 | 0.5 |
| RSZYD18078713_A_saliva.metaspades.bin.36             | 1   | 0 | 0 | 0 | 0   |
| GCA_015257445.1_ASM1525744v1                         | 1   | 0 | 0 | 0 | 1   |
| R0170300378_saliva_RAH.megahit.bin.36                | 1   | 0 | 0 | 0 | 1   |
| RDPYD18300377_A_saliva.metaspades.bin.20             | 1   | 0 | 0 | 0 | 1   |
| RDPYD18300381_A_saliva.metaspades.bin.93             | 1   | 0 | 0 | 0 | 0   |
| YS000257_saliva.spades.bin.31                        | 1   | 0 | 0 | 0 | 0   |
| GCA_015257785.3_ASM1525778v3                         | 1   | 0 | 0 | 0 | 0   |
| GCA_015257795.3_ASM1525779v3                         | 1   | 0 | 0 | 0 | 0   |
| RDPYD18189852_A_saliva.metaspades.bin.58             | 1   | 0 | 0 | 0 | 0   |
| R0170300249_tooth_RAH.megahit.bin.28                 | 1   | 0 | 0 | 0 | 1   |
| GCA_934725355.1_ERR7738173_bin.40                    | 1   | 0 | 0 | 0 | 0.5 |
| GCA_017556795.1_ASM1755679v1                         | 1   | 1 | 0 | 0 | 1   |
| RDPYD18098996_A_saliva.metaspades.bin.18             | 1   | 0 | 0 | 0 | 0   |
| RDPYD18098912_A_saliva.metaspades.bin.38             | 1   | 0 | 0 | 0 | 0   |
| RDPYD18088813_A_saliva.metaspades.bin.37             | 1   | 0 | 0 | 0 | 0   |
| SZAXPI018453-13_RA_saliva.metaspades.bin.65          | 1   | 0 | 0 | 0 | 0   |
| GCA_017421685.1_ASM1742168v1                         | 1   | 1 | 0 | 0 | 1   |
| GCA_007845325.1_ASM784532v1                          | 0.5 | 0 | 1 | 0 | 0   |
| R0170300266_tooth_RAH.megahit.bin.12                 | 0.5 | 0 | 1 | 0 | 0   |
| R0170300213_tooth_RA.megahit.bin.11                  | 1   | 0 | 0 | 0 | 1   |
| SZAXPI018354-19_RA_saliva.metaspades.bin.46          | 1   | 0 | 0 | 0 | 0   |
| RDPYD18201945_A_saliva.metaspades.bin.17             | 1   | 0 | 0 | 0 | 0   |
| R0170300336_saliva_RA.megahit.bin.72                 | 1   | 0 | 0 | 0 | 0   |
| RDPYD18300202_A_saliva.metaspades.bin.45             | 1   | 0 | 0 | 0 | 0   |
| R0170300320_tooth_RAH.megahit.bin.52                 | 0.8 | 0 | 1 | 0 | 0   |
| GCA_015257815.1_ASM1525781v1                         | 1   | 0 | 0 | 0 | 0   |
| R0170300276_tooth_RAH.megahit.bin.19                 | 0.9 | 0 | 1 | 0 | 0   |
| GCA_947368805.1_SRR15431190_bin.13_metawrap_v1.3_MAG | 0.8 | 0 | 0 | 0 | 0.5 |
| RSZYD18078181_A_saliva.metaspades.bin.24             | 1   | 0 | 0 | 0 | 1   |
| GCA_013332955.2_ASM1333295v2                         | 1   | 0 | 0 | 0 | 1   |
| RSZYD18078467_A_saliva.metaspades.bin.16             | 1   | 0 | 0 | 0 | 0   |
| RSZYD18078807_A_saliva.metaspades.bin.46             | 1   | 0 | 1 | 0 | 0   |
| R0170300061_tooth_RA.megahit.bin.44                  | 1   | 0 | 0 | 0 | 0.5 |
| R0170300271_tooth_RAH.megahit.bin.84                 | 1   | 0 | 0 | 0 | 1   |
| R0170300254_tooth_RAH.megahit.bin.23                 | 0.1 | 0 | 1 | 0 | 0.5 |
| YS000274_saliva.spades.bin.38                        | 1   | 0 | 1 | 0 | 0   |
| RSZYD18187666_A_saliva.metaspades.bin.39             | 1   | 0 | 0 | 0 | 0.5 |
| GCA_016196195.1_ASM1619619v1                         | 0.4 | 0 | 1 | 1 | 0   |
| RSZYD18187344_A_saliva.metaspades.bin.71             | 1   | 0 | 0 | 0 | 1   |
| RSZYD18187336_A_saliva.metaspades.bin.56             | 0.8 | 0 | 0 | 0 | 1   |
| GCA_009783235.1_ASM978323v1                          | 1   | 1 | 0 | 0 | 0.5 |
| GCA_013333135.2_ASM1333313v2                         | 1   | 0 | 0 | 0 | 1   |
| GCA_007131065.1_ASM713106v1                          | 1   | 0 | 1 | 0 | 0   |
| YS000932_saliva.spades.bin.7                         | 1   | 0 | 0 | 0 | 0   |
| GCA_015257505.1_ASM1525750v1                         | 1   | 0 | 0 | 0 | 1   |
| RDPYD18098936_A_saliva.metaspades.bin.10             | 1   | 0 | 0 | 0 | 0   |
| RSZYD18078748_A_saliva.metaspades.bin.42             | 1   | 0 | 0 | 0 | 0   |
| SRR6748223.metaspades.bin.6                          | 1   | 0 | 0 | 0 | 0   |
| SZAXPI018280-95_RA_dental.metaspades.bin.19          | 1   | 0 | 0 | 0 | 0   |
| SZAXPI018318-20_RA_dental.metaspades.bin.22          | 1   | 0 | 0 | 0 | 0   |
| RSZYD18078075_A_saliva.metaspades.bin.101            | 1   | 0 | 0 | 0 | 0   |
| SZAXPI018436-90_RA_saliva.metaspades.bin.9           | 1   | 0 | 0 | 0 | 0   |
| RSZYD18187316_A_saliva.metaspades.bin.18             | 1   | 0 | 0 | 0 | 0   |
| RDPYD18097490_A_saliva.metaspades.bin.7              | 1   | 0 | 0 | 0 | 0   |
| SRR8114071.metaspades.bin.18                         | 1   | 0 | 0 | 0 | 0   |
| RDPYD18201735_A_saliva.metaspades.bin.32             | 1   | 0 | 0 | 0 | 0   |
| RSZYD18187663_A_saliva.metaspades.bin.60             | 1   | 0 | 0 | 0 | 0   |
| SZAXPI018397-37_RA_saliva.metaspades.bin.28          | 1   | 0 | 0 | 0 | 0   |
| RSZYD18078481_A_saliva.metaspades.bin.7              | 1   | 0 | 0 | 0 | 0   |
| RSZYD18187447_A_saliva.metaspades.bin.38             | 1   | 0 | 0 | 0 | 0   |
| R0170300232_tooth_RA.megahit.bin.71                  | 1   | 0 | 0 | 0 | 0   |

|                                                      |     |   |   |   |     |
|------------------------------------------------------|-----|---|---|---|-----|
| SZAXPI018406-56_RA_saliva.metaspades.bin.70          | 1   | 0 | 0 | 0 | 1   |
| RSZAXPI002641-101_RA_dental.metaspades.bin.19        | 0.4 | 0 | 1 | 0 | 0   |
| GCA_946406645.1_SRR12081302_bin.54_metaWRAP_v1.3_MAG | 0.5 | 0 | 0 | 0 | 1   |
| SRR8114052.metaspades.bin.61                         | 1   | 0 | 0 | 0 | 0   |
| SZAXPI018357-22_RA_saliva.metaspades.bin.38          | 1   | 0 | 0 | 0 | 0.5 |
| GCA_947364965.1_SRR16350202_bin.8_metawrap_v1.3_MAG  | 1   | 0 | 0 | 0 | 0.5 |
| R0170300110_tooth_RA.megahit.bin.38                  | 0.8 | 0 | 0 | 0 | 0   |
| RDPYD18300014_A_saliva.metaspades.bin.15             | 0.8 | 0 | 1 | 0 | 0   |
| SZAXPI018492-24_RA_saliva.metaspades.bin.47          | 1   | 0 | 0 | 0 | 1   |
| SZAXPI018358-23_RA_saliva.metaspades.bin.53          | 1   | 0 | 0 | 0 | 1   |
| GCA_002437225.1_ASM243722v1                          | 1   | 1 | 0 | 0 | 0.5 |
| R0170300100_tooth_RA.megahit.bin.38                  | 1   | 0 | 0 | 0 | 0.5 |
| RDPYD18098889_A_saliva.metaspades.bin.64             | 1   | 0 | 0 | 0 | 0   |
| GCA_004100265.1_ASM410026v1                          | 0.4 | 0 | 1 | 1 | 0   |
| SZAXPI018103-24_RA_dental.metaspades.bin.40          | 0.5 | 0 | 0 | 0 | 1   |
| GCA_947364625.1_SRR16350215_bin.9_metawrap_v1.3_MAG  | 0.8 | 0 | 0 | 0 | 0.5 |
| R0170300060_tooth_RA.megahit.bin.77                  | 0.1 | 0 | 1 | 0 | 0   |
| RDPYD18098861_A_saliva.metaspades.bin.17             | 1   | 0 | 0 | 0 | 0   |
| RSZYD18078181_A_saliva.metaspades.bin.55             | 1   | 0 | 0 | 0 | 0   |
| RSZYD18078555_A_saliva.metaspades.bin.67             | 0.8 | 0 | 0 | 0 | 0   |
| RSZYD18187059_A_saliva.metaspades.bin.27             | 1   | 0 | 0 | 0 | 1   |
| RSZYD18078446_A_saliva.metaspades.bin.25             | 1   | 0 | 0 | 0 | 0   |
| RDPYD18098560_A_saliva.metaspades.bin.42             | 1   | 0 | 0 | 0 | 0   |
| RDPYD18201938_A_saliva.metaspades.bin.16             | 1   | 0 | 0 | 0 | 0   |
| RDPYD18098916_A_saliva.metaspades.bin.11             | 1   | 0 | 0 | 0 | 0   |
| RDPYD18098308_A_saliva.metaspades.bin.70             | 1   | 0 | 0 | 0 | 0   |
| R0170300118_tooth_RA.megahit.bin.46                  | 1   | 0 | 0 | 0 | 0   |
| RSZYD18187344_A_saliva.metaspades.bin.53             | 1   | 0 | 0 | 0 | 0   |
| RDPYD18098966_A_saliva.metaspades.bin.10             | 1   | 0 | 0 | 0 | 0   |
| RDPYD18098935_A_saliva.metaspades.bin.23             | 1   | 0 | 0 | 0 | 0   |
| RSZYD18078705_A_saliva.metaspades.bin.21             | 1   | 0 | 0 | 0 | 0   |
| YS000444_saliva.spades.bin.11                        | 1   | 0 | 0 | 0 | 0   |
| R0170300104_tooth_RA.megahit.bin.12                  | 1   | 0 | 0 | 0 | 0   |
| RSZYD18078225_A_saliva.metaspades.bin.17             | 1   | 0 | 0 | 0 | 0   |
| RSZYD18078623_A_saliva.metaspades.bin.44             | 1   | 0 | 0 | 0 | 0   |
| RDPYD18300076_A_saliva.metaspades.bin.3              | 1   | 0 | 0 | 0 | 0   |
| SZAXPI018452-169_1_RA_saliva.metaspades.bin.16       | 1   | 0 | 0 | 0 | 0   |
| RDPYD18097580_A_saliva.metaspades.bin.29             | 1   | 0 | 0 | 0 | 0   |
| R0170300217_tooth_RA.megahit.bin.11                  | 1   | 0 | 0 | 0 | 0   |
| R0170300305_tooth_RAH.megahit.bin.5                  | 1   | 0 | 0 | 0 | 0   |
| RSZYD18187045_A_saliva.metaspades.bin.39             | 1   | 0 | 0 | 0 | 0   |
| R0170300350_saliva_RA.megahit.bin.87                 | 1   | 0 | 0 | 0 | 0   |
| RDPYD18189965_A_saliva.metaspades.bin.61             | 1   | 0 | 0 | 0 | 0   |
| RDPYD18201685_A_saliva.metaspades.bin.24             | 1   | 0 | 0 | 0 | 0   |
| RSZYD18187124_A_saliva.metaspades.bin.16             | 1   | 0 | 0 | 0 | 0   |
| RSZYD18078262_A_saliva.metaspades.bin.69             | 1   | 0 | 0 | 0 | 0   |
| RSZYD18187112_A_saliva.metaspades.bin.35             | 1   | 0 | 0 | 0 | 0   |
| R0170300296_tooth_RAH.megahit.bin.95                 | 1   | 0 | 0 | 0 | 0   |
| RSZAXPI002633-90_RA_dental.metaspades.bin.24         | 1   | 0 | 0 | 0 | 0   |
| RDPYD18098794_A_saliva.metaspades.bin.6              | 1   | 0 | 0 | 0 | 0   |
| RSZYD18187758_A_saliva.metaspades.bin.70             | 1   | 0 | 0 | 0 | 0   |
| R0170300254_tooth_RAH.megahit.bin.73                 | 0.7 | 0 | 1 | 0 | 0   |
| RSZYD18187184_A_saliva.metaspades.bin.14             | 1   | 0 | 0 | 0 | 1   |
| RSZYD18187330_A_saliva.metaspades.bin.30             | 0.9 | 0 | 0 | 0 | 1   |
| R0170300214_tooth_RA.megahit.bin.54                  | 0.8 | 0 | 1 | 0 | 0   |
| GCA_934717805.1_ERR7745621_bin.22                    | 1   | 0 | 0 | 0 | 0   |
| RSZYD18078343_A_saliva.metaspades.bin.34             | 0.8 | 0 | 0 | 0 | 1   |
| SZAXPI018286-123_RA_dental.metaspades.bin.94         | 1   | 0 | 0 | 0 | 1   |
| RDPYD18201913_A_saliva.metaspades.bin.10             | 1   | 0 | 0 | 0 | 0   |
| RSZYD18187002_A_saliva.metaspades.bin.39             | 1   | 0 | 0 | 0 | 1   |
| GCA_020428425.1_ASM2042842v1                         | 0.5 | 0 | 1 | 0 | 0   |
| YS000721_saliva.spades.bin.7                         | 1   | 0 | 0 | 0 | 0   |
| R0170300224_tooth_RA.megahit.bin.6                   | 0.5 | 0 | 1 | 0 | 0   |
| R0170300251_tooth_RAH.megahit.bin.83                 | 1   | 0 | 1 | 0 | 0   |
| RDPYD18098785_A_saliva.metaspades.bin.37             | 0.8 | 0 | 0 | 0 | 0   |
| GCA_020428525.1_ASM2042852v1                         | 0.3 | 0 | 1 | 0 | 0.5 |
| SZAXPI018315-17_RA_dental.metaspades.bin.21          | 0.8 | 0 | 0 | 0 | 0   |
| RSZAXPI002614-22_RA_dental.metaspades.bin.18         | 1   | 0 | 0 | 0 | 0.5 |
| RDPYD18189812_A_saliva.metaspades.bin.9              | 1   | 0 | 0 | 0 | 0   |
| RDPYD18098375_A_saliva.metaspades.bin.22             | 1   | 0 | 0 | 0 | 0   |
| SZAXPI018181-37_RA_dental.metaspades.bin.33          | 1   | 0 | 0 | 0 | 0.5 |
| R0170300309_tooth_RAH.megahit.bin.15                 | 1   | 0 | 0 | 0 | 0.5 |
| RSZYD18187690_A_saliva.metaspades.bin.43             | 1   | 0 | 0 | 0 | 1   |
| GCA_017540725.1_ASM1754072v1                         | 0.5 | 0 | 0 | 0 | 1   |
| RDPYD18088975_A_saliva.metaspades.bin.20             | 1   | 0 | 0 | 0 | 0   |
| GCA_947253405.1_SRR17635715_bin.15_metaWRAP_v1.3_MAG | 1   | 1 | 0 | 0 | 0.5 |
| RDPYD18300020_A_saliva.metaspades.bin.20             | 1   | 0 | 0 | 0 | 0   |
| R0170300061_tooth_RA.megahit.bin.55                  | 1   | 0 | 0 | 0 | 0   |



|                                                      |     |   |   |   |     |
|------------------------------------------------------|-----|---|---|---|-----|
| GCA_009778675.1_ASM977867v1                          | 0.9 | 0 | 0 | 0 | 0.5 |
| RDPYD18201655_A_saliva.metaspades.bin.21             | 1   | 0 | 0 | 0 | 1   |
| GCA_013333375.2_ASM1333337v2                         | 1   | 0 | 0 | 0 | 1   |
| R0170300248_tooth_RAH.megahit.bin.109                | 1   | 0 | 0 | 0 | 1   |
| RDPYD18088954_A_saliva.metaspades.bin.47             | 0.8 | 0 | 0 | 0 | 0   |
| RDPYD18088838_A_saliva.metaspades.bin.60             | 0.8 | 0 | 0 | 0 | 0   |
| RDPYD18189907_A_saliva.metaspades.bin.2              | 1   | 0 | 0 | 0 | 0   |
| RDPYD18098998_A_saliva.metaspades.bin.11             | 1   | 0 | 0 | 0 | 0   |
| SZAXPI018433-84_RA_saliva.metaspades.bin.87          | 1   | 0 | 0 | 0 | 0   |
| SZAXPI018490-22_RA_saliva.metaspades.bin.30          | 1   | 0 | 0 | 0 | 0   |
| GCA_945872155.1_SRR15732359_bin.8_metaWRAP_v1.3_MAG  | 1   | 0 | 0 | 0 | 1   |
| R0170300258_tooth_RAH.megahit.bin.73                 | 1   | 0 | 1 | 0 | 0   |
| RSZAXPI002310-19_RAH_dental.metaspades.bin.24        | 1   | 0 | 0 | 0 | 0.5 |
| RDPYD18201891_A_saliva.metaspades.bin.24             | 0.8 | 0 | 0 | 0 | 0   |
| RSZAXPI002313-22_RAH_dental.metaspades.bin.48        | 1   | 0 | 0 | 0 | 1   |
| RDPYD18088781_A_saliva.metaspades.bin.15             | 0.3 | 0 | 1 | 0 | 0   |
| GCA_943354725.1_RH-27jun17-331                       | 0.1 | 0 | 1 | 0 | 0   |
| R0170300057_tooth_RA.megahit.bin.6                   | 0.8 | 0 | 1 | 0 | 0.5 |
| R0170300251_tooth_RAH.megahit.bin.36                 | 1   | 0 | 0 | 0 | 0.5 |
| R0170300222_tooth_RA.megahit.bin.89                  | 1   | 0 | 0 | 0 | 0.5 |
| RSZAXPI002321-33_RAH_dental.metaspades.bin.29        | 1   | 0 | 0 | 0 | 0.5 |
| GCA_915070725.1_SRR1045092_bin.5_metaWRAP_v1.1_MAG   | 1   | 0 | 0 | 0 | 0.5 |
| GCA_947307445.1_SRR10912535_bin.43_metaWRAP_v1.3_MAG | 0.6 | 0 | 0 | 0 | 1   |
| R0170300106_tooth_RA.megahit.bin.39                  | 1   | 0 | 0 | 0 | 0.5 |
| R0170300276_tooth_RAH.megahit.bin.88                 | 1   | 0 | 0 | 0 | 0.5 |
| RSZYD18078259_A_saliva.metaspades.bin.22             | 1   | 0 | 0 | 0 | 1   |
| R0170300213_tooth_RA.megahit.bin.121                 | 0.8 | 0 | 0 | 0 | 0   |
| GCA_946624835.1_SRR873600_bin.13_metaWRAP_v1.3_MAG   | 0.7 | 0 | 0 | 0 | 1   |
| R0170300303_tooth_RAH.megahit.bin.44                 | 1   | 0 | 0 | 0 | 1   |
| SZAXPI018435-88_RA_saliva.metaspades.bin.58          | 1   | 0 | 0 | 0 | 0.5 |
| GCA_905372225.1_SRR9217401-mag-bin.8                 | 1   | 0 | 0 | 0 | 0.5 |
| RSZAXPI002656-16_RA_dental.metaspades.bin.48         | 1   | 0 | 0 | 0 | 0.5 |
| GCA_905365345.1_ERZ1645002-mag-bin.1                 | 1   | 0 | 0 | 0 | 0.5 |
| GCA_013333515.2_ASM1333351v2                         | 1   | 0 | 0 | 0 | 0.5 |
| RSZAXPI002330-47_RAH_dental.metaspades.bin.70        | 1   | 0 | 0 | 0 | 0.5 |
| R0170300326_tooth_RA.megahit.bin.12                  | 1   | 0 | 0 | 0 | 0.5 |
| RSZYD18187275_A_saliva.metaspades.bin.59             | 1   | 0 | 0 | 0 | 0.5 |
| SZAXPI018171-25_1_RA_dental.metaspades.bin.83        | 1   | 0 | 0 | 0 | 0.5 |
| SZAXPI018284-111_RA_dental.metaspades.bin.3          | 1   | 0 | 0 | 0 | 0.5 |
| R0170300178_tooth_RA.megahit.bin.23                  | 1   | 0 | 0 | 0 | 0.5 |
| R0170300133_tooth_RA.megahit.bin.60                  | 1   | 0 | 0 | 0 | 0.5 |
| RDPYD18300015_A_saliva.metaspades.bin.29             | 1   | 0 | 0 | 0 | 1   |
| SZAXPI018453-13_RA_saliva.metaspades.bin.39          | 1   | 0 | 0 | 0 | 0   |
| SZAXPI018097-18_RA_dental.metaspades.bin.87          | 1   | 0 | 0 | 0 | 0.5 |
| R0170300205_tooth_RA.megahit.bin.38                  | 1   | 0 | 0 | 0 | 0.5 |
| R0170300255_tooth_RAH.megahit.bin.7                  | 1   | 0 | 0 | 0 | 0.5 |
| GCA_905373385.1_SRR9217464-mag-bin.2                 | 1   | 0 | 0 | 0 | 0.5 |
| R0170300282_tooth_RAH.megahit.bin.15                 | 1   | 0 | 0 | 0 | 0.5 |
| RSZAXPI002675-22_RA_dental.metaspades.bin.45         | 1   | 0 | 0 | 0 | 0.5 |
| R0170300214_tooth_RA.megahit.bin.92                  | 0.8 | 0 | 0 | 0 | 0.5 |
| GCA_015257485.1_ASM1525748v1                         | 0.8 | 0 | 0 | 0 | 1   |
| RSZAXPI002305-14_RAH_dental.metaspades.bin.64        | 1   | 0 | 0 | 0 | 0.5 |
| R0170300065_tooth_RA.megahit.bin.77                  | 1   | 0 | 0 | 0 | 0.5 |
| SZAXPI018354-19_RA_saliva.metaspades.bin.2           | 1   | 0 | 0 | 0 | 0.5 |
| R0170300127_tooth_RA.megahit.bin.7                   | 1   | 0 | 0 | 0 | 0.5 |
| R0170300176_tooth_RA.megahit.bin.83                  | 1   | 0 | 0 | 0 | 0.5 |
| SZAXPI018397-37_RA_saliva.metaspades.bin.18          | 0.8 | 0 | 0 | 0 | 1   |
| RSZAXPI002633-90_RA_dental.metaspades.bin.54         | 1   | 0 | 0 | 0 | 0.5 |
| RSZYD18187116_A_saliva.metaspades.bin.9              | 1   | 0 | 0 | 0 | 0   |
| RSZYD18187537_A_saliva.metaspades.bin.34             | 1   | 0 | 0 | 0 | 0   |
| RSZAXPI002639-98_RA_dental.metaspades.bin.8          | 1   | 0 | 0 | 0 | 0   |
| R0170300312_tooth_RAH.megahit.bin.31                 | 1   | 0 | 0 | 0 | 0   |
| R0170300267_tooth_RAH.megahit.bin.18                 | 0.8 | 0 | 0 | 0 | 0.5 |
| SZAXPI018178-34_RA_dental.metaspades.bin.52          | 1   | 0 | 0 | 0 | 0.5 |
| YS000161_saliva.spades.bin.8                         | 0.8 | 0 | 0 | 0 | 0   |
| R0170300303_tooth_RAH.megahit.bin.143                | 1   | 0 | 0 | 0 | 0.5 |
| R0170300121_tooth_RA.megahit.bin.23                  | 1   | 0 | 0 | 0 | 0.5 |
| R0170300120_tooth_RA.megahit.bin.52                  | 1   | 0 | 0 | 0 | 0.5 |
| RSZAXPI002306-15_2_RAH_saliva.metaspades.bin.36      | 1   | 0 | 0 | 0 | 0   |
| RSZYD18187382_A_saliva.metaspades.bin.10             | 1   | 0 | 0 | 0 | 0   |
| GCA_947425855.1_SRR19981115_bin.7_metawrap_v1.3_MAG  | 0.7 | 0 | 0 | 0 | 0.5 |
| R0170300092_tooth_RA.megahit.bin.31                  | 1   | 0 | 0 | 0 | 0.5 |
| R0170300185_tooth_RA.megahit.bin.44                  | 1   | 0 | 0 | 0 | 0.5 |
| R0170300187_tooth_RA.megahit.bin.41                  | 1   | 0 | 0 | 0 | 0.5 |
| GCA_001790455.1_ASM179045v1                          | 0.2 | 0 | 1 | 0 | 0.5 |
| RSZAXPI002604-26_RA_dental.metaspades.bin.6          | 1   | 0 | 0 | 0 | 0.5 |
| R0170300110_tooth_RA.megahit.bin.49                  | 1   | 0 | 0 | 0 | 0.5 |
| RDPYD18189858_A_saliva.metaspades.bin.62             | 0.8 | 0 | 0 | 0 | 0.5 |

|                                                      |     |   |   |   |     |
|------------------------------------------------------|-----|---|---|---|-----|
| YS000259_saliva.spades.bin.14                        | 0.8 | 0 | 0 | 0 | 0   |
| R0170300207_tooth_RA.megahit.bin.65                  | 1   | 0 | 0 | 0 | 0.5 |
| GCA_016112465.1_ASM1611246v1                         | 0.8 | 0 | 0 | 0 | 1   |
| SZAXPI018094-15_RA_dental.metaspades.bin.29          | 1   | 0 | 0 | 0 | 0.5 |
| RSZAXPI002331-56_RAH_dental.metaspades.bin.18        | 1   | 0 | 0 | 0 | 0.5 |
| R0170300136_tooth_RA.megahit.bin.26                  | 1   | 0 | 0 | 0 | 0.5 |
| RSZAXPI002456-79_RAH_dental.metaspades.bin.34        | 1   | 0 | 0 | 0 | 0.5 |
| YS000254_saliva.spades.bin.23                        | 1   | 0 | 0 | 0 | 0.5 |
| R0170300182_tooth_RA.megahit.bin.100                 | 1   | 0 | 0 | 0 | 0.5 |
| RSZYD18187330_A_saliva.metaspades.bin.47             | 1   | 0 | 0 | 0 | 0.5 |
| SZAXPI018096-17_RA_dental.metaspades.bin.67          | 1   | 0 | 0 | 0 | 0.5 |
| R0170300170_tooth_RA.megahit.bin.136                 | 1   | 0 | 0 | 0 | 0.5 |
| SZAXPI018282-108_RA_dental.metaspades.bin.70         | 1   | 0 | 0 | 0 | 0.5 |
| R0170300321_tooth_RAH.megahit.bin.95                 | 1   | 0 | 0 | 0 | 0   |
| R0170300172_tooth_RA.megahit.bin.52                  | 1   | 0 | 0 | 0 | 0.5 |
| R0170300162_tooth_RA.megahit.bin.4                   | 1   | 0 | 0 | 0 | 0   |
| R0170300325_tooth_RA.megahit.bin.8                   | 1   | 0 | 0 | 0 | 0.5 |
| RSZYD18078111_A_saliva.metaspades.bin.26             | 1   | 0 | 0 | 0 | 0.5 |
| RDPYD18300036_A_saliva.metaspades.bin.53             | 0.8 | 0 | 0 | 0 | 1   |
| R0170300355_saliva_RA.megahit.bin.8                  | 1   | 0 | 0 | 0 | 0.5 |
| GCA_004138455.1_ASM413845v1                          | 1   | 0 | 0 | 0 | 0.5 |
| R0170300287_tooth_RAH.megahit.bin.151                | 1   | 0 | 0 | 0 | 0.5 |
| RSZAXPI002455-75_RAH_dental.metaspades.bin.27        | 1   | 0 | 0 | 0 | 0.5 |
| R0170300310_tooth_RAH.megahit.bin.34                 | 1   | 0 | 0 | 0 | 0.5 |
| R0170300302_tooth_RAH.megahit.bin.56                 | 1   | 0 | 0 | 0 | 0.5 |
| RDPYD18189835_A_saliva.metaspades.bin.31             | 0.9 | 0 | 0 | 0 | 1   |
| R0170300232_tooth_RA.megahit.bin.10                  | 1   | 0 | 0 | 0 | 0.5 |
| RSZAXPI002622-39_RA_saliva.metaspades.bin.19         | 0.7 | 0 | 0 | 0 | 1   |
| RDPYD18088981_A_saliva.metaspades.bin.1              | 0.8 | 0 | 0 | 0 | 1   |
| R0170300083_tooth_RA.megahit.bin.110                 | 1   | 0 | 0 | 0 | 0.5 |
| R0170300277_tooth_RAH.megahit.bin.80                 | 1   | 0 | 0 | 0 | 0.5 |
| SZAXPI018320-22_RA_dental.metaspades.bin.9           | 1   | 0 | 0 | 0 | 0.5 |
| RSZYD18187542_A_saliva.metaspades.bin.26             | 0.6 | 0 | 1 | 0 | 0   |
| SZAXPI018313-15_RA_dental.metaspades.bin.43          | 0.9 | 0 | 0 | 0 | 0.5 |
| R0170300272_tooth_RAH.megahit.bin.14                 | 1   | 0 | 0 | 0 | 0.5 |
| R0170300203_tooth_RA.megahit.bin.29                  | 1   | 0 | 0 | 0 | 0.5 |
| SZAXPI018274-87_RA_dental.metaspades.bin.66          | 1   | 0 | 0 | 0 | 0.5 |
| R0170300263_tooth_RAH.megahit.bin.26                 | 1   | 0 | 0 | 0 | 0.5 |
| RSZAXPI002627-75_RA_dental.metaspades.bin.25         | 1   | 0 | 0 | 0 | 0.5 |
| R0170300206_tooth_RA.megahit.bin.6                   | 1   | 0 | 0 | 0 | 0.5 |
| R0170300149_tooth_RA.megahit.bin.28                  | 1   | 0 | 0 | 0 | 0.5 |
| R0170300252_tooth_RAH.megahit.bin.32                 | 1   | 0 | 0 | 0 | 0.5 |
| GCA_027365555.1_ASM2736555v1                         | 0.3 | 0 | 1 | 1 | 0   |
| R0170300356_saliva_RA.megahit.bin.101                | 0.9 | 0 | 0 | 0 | 0   |
| R0170300279_tooth_RAH.megahit.bin.93                 | 1   | 0 | 0 | 0 | 0.5 |
| RSZAXPI002620-35_RA_dental.metaspades.bin.60         | 1   | 0 | 0 | 0 | 0.5 |
| GCA_947304825.1_SRR10912542_bin.28_metaWRAP_v1.3_MAG | 0.8 | 1 | 0 | 0 | 0.5 |
| R0170300139_tooth_RA.megahit.bin.95                  | 1   | 0 | 0 | 0 | 0.5 |
| RDPYD18189959_A_saliva.metaspades.bin.31             | 1   | 0 | 0 | 0 | 1   |
| RSZAXPI002465-98_2_RAH_saliva.metaspades.bin.9       | 0.7 | 0 | 0 | 0 | 1   |
| RDPYD18099036_A_saliva.metaspades.bin.59             | 1   | 0 | 0 | 0 | 0   |
| RSZAXPI002312-21_RAH_dental.metaspades.bin.14        | 1   | 0 | 0 | 0 | 0.5 |
| R0170300306_tooth_RAH.megahit.bin.102                | 1   | 0 | 0 | 0 | 0.5 |
| ERR2764804.metaspades.bin.10                         | 0.9 | 0 | 0 | 0 | 0   |
| GCA_902461855.1_UHGG-TPA_MGYG-HGUT-00376             | 0.8 | 0 | 0 | 0 | 0.5 |
| SZAXPI018355-20_RA_saliva.metaspades.bin.45          | 1   | 0 | 0 | 0 | 0.5 |
| R0170300285_tooth_RAH.megahit.bin.21                 | 1   | 0 | 0 | 0 | 0.5 |
| R0170300311_tooth_RAH.megahit.bin.92                 | 0.8 | 0 | 0 | 0 | 0.5 |
| R0170300279_tooth_RAH.megahit.bin.30                 | 1   | 0 | 0 | 0 | 0.5 |
| RSZYD18078398_A_saliva.metaspades.bin.15             | 1   | 0 | 0 | 0 | 0.5 |
| RSZYD18078570_A_saliva.metaspades.bin.17             | 1   | 0 | 0 | 0 | 0.5 |
| GCA_947097085.1_SRR8786267_bin.10_metaWRAP_v1.3_MAG  | 1   | 0 | 0 | 0 | 0.5 |
| GCA_905373275.1_SRR9217462-mag-bin.7                 | 1   | 0 | 0 | 0 | 0.5 |
| R0170300200_tooth_RA.megahit.bin.29                  | 1   | 0 | 0 | 0 | 0.5 |
| R0170300078_tooth_RA.megahit.bin.66                  | 1   | 0 | 0 | 0 | 0.5 |
| RSZYD18187614_A_saliva.metaspades.bin.13             | 0.9 | 0 | 0 | 0 | 0   |
| R0170300308_tooth_RAH.megahit.bin.62                 | 1   | 0 | 0 | 0 | 0.5 |
| RDPYD18189875_A_saliva.metaspades.bin.4              | 1   | 0 | 1 | 0 | 0   |
| R0170300115_tooth_RA.megahit.bin.91                  | 1   | 0 | 0 | 0 | 0.5 |
| R0170300145_tooth_RA.megahit.bin.69                  | 1   | 0 | 0 | 0 | 0.5 |
| RSZAXPI002603-21_RA_dental.metaspades.bin.30         | 1   | 0 | 0 | 0 | 0.5 |
| RSZAXPI002460-93_2_RAH_saliva.metaspades.bin.39      | 0.9 | 0 | 0 | 0 | 0   |
| RSZYD18187409_A_saliva.metaspades.bin.8              | 0.9 | 0 | 1 | 0 | 0   |
| RSZYD18187801_A_saliva.metaspades.bin.74             | 0.9 | 0 | 0 | 0 | 0   |
| R0170300183_tooth_RA.megahit.bin.33                  | 1   | 0 | 0 | 0 | 0.5 |
| R0170300155_tooth_RA.megahit.bin.58                  | 1   | 0 | 0 | 0 | 0.5 |
| RSZYD18187711_A_saliva.metaspades.bin.3              | 0.5 | 0 | 0 | 0 | 0   |
| R0170300266_tooth_RAH.megahit.bin.24                 | 1   | 0 | 0 | 0 | 0.5 |

|                                              |     |   |   |   |     |
|----------------------------------------------|-----|---|---|---|-----|
| R0170300217_tooth_RA.megahit.bin.23          | 1   | 0 | 0 | 0 | 0.5 |
| SZAXPI018396-36_RA_saliva.metaspades.bin.56  | 0.8 | 0 | 0 | 0 | 0.5 |
| R0170300290_tooth_RAH.megahit.bin.12         | 0.8 | 0 | 0 | 0 | 0.5 |
| RSZYD18187349_A_saliva.metaspades.bin.40     | 0.8 | 0 | 0 | 0 | 0   |
| R0170300288_tooth_RAH.megahit.bin.40         | 0.9 | 0 | 0 | 0 | 0.5 |
| RSZYD18187174_A_saliva.metaspades.bin.29     | 0.8 | 0 | 0 | 0 | 1   |
| RDPYD18123882_A_tongue.metaspades.bin.29     | 0.6 | 0 | 0 | 0 | 0   |
| RSZYD18187327_A_saliva.metaspades.bin.15     | 0.5 | 0 | 0 | 0 | 1   |
| RDPYD18098591_A_saliva.metaspades.bin.49     | 0.9 | 0 | 0 | 0 | 0   |
| SZAXPI018279-94_RA_dental.metaspades.bin.16  | 0.9 | 0 | 0 | 0 | 0.5 |
| R0170300270_tooth_RAH.megahit.bin.32         | 0.8 | 0 | 0 | 0 | 0   |
| RDPYD18201775_A_saliva.metaspades.bin.17     | 0.7 | 0 | 0 | 0 | 0   |
| RSZAXPI002629-81_RA_dental.metaspades.bin.82 | 0.9 | 0 | 0 | 0 | 0.5 |
| R0170300051_tooth_RA.megahit.bin.56          | 1   | 0 | 0 | 0 | 0.5 |
| GCA_017512225.1_ASM1751222v1                 | 0.5 | 1 | 0 | 0 | 0.5 |
| R0170300219_tooth_RA.megahit.bin.90          | 0.9 | 0 | 0 | 0 | 0   |
| RSZYD18078542_A_saliva.metaspades.bin.52     | 0.7 | 0 | 0 | 0 | 0.5 |
| GCA_004138445.1_ASM413844v1                  | 0.5 | 0 | 0 | 0 | 0.5 |
| R0170300228_tooth_RA.megahit.bin.36          | 0.5 | 0 | 0 | 0 | 0.5 |
| RSZAXPI002619-34_RA_dental.metaspades.bin.45 | 0.3 | 0 | 0 | 0 | 0   |
| GCA_026708245.1_ASM2670824v1                 | 0   | 0 | 0 | 0 | 0   |
| GCA_026707815.1_ASM2670781v1                 | 0   | 0 | 0 | 0 | 0   |
| GCA_026706615.1_ASM2670661v1                 | 0   | 0 | 0 | 0 | 0   |

---



# Supplementary Table 3d. KO in different modules of Saccharibacteria

| Genome                                                            | KO                                                                               | Module |
|-------------------------------------------------------------------|----------------------------------------------------------------------------------|--------|
| RSZYD18078446_A_saliva.metaspades.bin.25                          | {'K01834', 'K00927', 'K01689', 'K01803', 'K00134', 'K00873'}                     | M00002 |
| SZAXPI018396-36_RA_saliva.metaspades.bin.56                       | {'K01834', 'K00927', 'K01803', 'K00134', 'K00873'}                               | M00002 |
| GCA_027492535.1_ASM2749253v1_genomic                              | {'K01834', 'K01689', 'K00927', 'K01803'}                                         | M00002 |
| GCA_027492535.1_ASM2749253v1_genomic                              | {'K02109', 'K02112', 'K02111', 'K02115', 'K02110', 'K02113', 'K02114'}           | M00157 |
| RSZYD18187511_A_saliva.metaspades.bin.2                           | {'K01834', 'K00927', 'K01689', 'K01803', 'K00134', 'K00873'}                     | M00002 |
| RSZYD18187511_A_saliva.metaspades.bin.2                           | {'K02108', 'K02115', 'K02110', 'K02113', 'K02109', 'K02112', 'K02111', 'K02114'} | M00157 |
| SZAXPI018312-14_RA_dental.metaspades.bin.43                       | {'K15633', 'K00927', 'K01689', 'K01803', 'K00134', 'K00873'}                     | M00002 |
| SZAXPI018312-14_RA_dental.metaspades.bin.43                       | {'K02108', 'K02115', 'K02110', 'K02113', 'K02109', 'K02112', 'K02111', 'K02114'} | M00157 |
| RSZYD18187613_A_saliva.metaspades.bin.34                          | {'K01834', 'K00927', 'K01689', 'K01803', 'K00134', 'K00873'}                     | M00002 |
| RSZYD18187613_A_saliva.metaspades.bin.34                          | {'K02108', 'K02115', 'K02110', 'K02113', 'K02109', 'K02112', 'K02111', 'K02114'} | M00157 |
| SZAXPI018318-20_RA_dental.metaspades.bin.38                       | {'K00927', 'K01689', 'K01803', 'K00134', 'K00873'}                               | M00002 |
| SZAXPI018318-20_RA_dental.metaspades.bin.38                       | {'K02108', 'K02115', 'K02110', 'K02113', 'K02109', 'K02112', 'K02111', 'K02114'} | M00157 |
| GCA_027426675.1_ASM2742667v1_genomic                              | {'K15633', 'K00927', 'K01803', 'K00134'}                                         | M00002 |
| GCA_027426675.1_ASM2742667v1_genomic                              | {'K02108', 'K02115', 'K02110', 'K02113', 'K02109', 'K02112', 'K02111', 'K02114'} | M00157 |
| GCA_020428475.1_ASM2042847v1_genomic                              | {'K00927', 'K01689', 'K01803', 'K00134', 'K00873'}                               | M00002 |
| GCA_020428475.1_ASM2042847v1_genomic                              | {'K02108', 'K02115', 'K02110', 'K02113', 'K02109', 'K02112', 'K02111', 'K02114'} | M00157 |
| R0170300242_tooth_RAH.megahit.bin.95                              | {'K01834', 'K01689', 'K01803', 'K00134', 'K00873'}                               | M00002 |
| R0170300242_tooth_RAH.megahit.bin.95                              | {'K02108', 'K02115', 'K02110', 'K02113', 'K02109', 'K02112', 'K02111', 'K02114'} | M00157 |
| R0170300272_tooth_RAH.megahit.bin.25                              | {'K00927', 'K01689', 'K01803', 'K00134', 'K00873'}                               | M00002 |
| R0170300272_tooth_RAH.megahit.bin.25                              | {'K02108', 'K02109', 'K02112', 'K02111', 'K02110', 'K02113', 'K02114'}           | M00157 |
| RSZYD18078015_A_saliva.metaspades.bin.19                          | {'K01834', 'K00927', 'K01689', 'K01803', 'K00134', 'K00873'}                     | M00002 |
| RSZYD18078015_A_saliva.metaspades.bin.19                          | {'K02108', 'K02115', 'K02110', 'K02113', 'K02109', 'K02112', 'K02111', 'K02114'} | M00157 |
| SRR6748184.metaspades.bin.16                                      | {'K01834', 'K00927', 'K01689', 'K01803', 'K00134', 'K00873'}                     | M00002 |
| SRR6748184.metaspades.bin.16                                      | {'K02108', 'K02115', 'K02110', 'K02113', 'K02109', 'K02112', 'K02111', 'K02114'} | M00157 |
| RSZAXPI002323-35_RAH_dental.metaspades.bin.28                     | {'K01834', 'K01689', 'K00873'}                                                   | M00002 |
| RSZAXPI002323-35_RAH_dental.metaspades.bin.28                     | {'K02108', 'K02115', 'K02110', 'K02113', 'K02109', 'K02112', 'K02111', 'K02114'} | M00157 |
| RSZYD18187853_A_saliva.metaspades.bin.37                          | {'K01834', 'K00927', 'K01689', 'K01803', 'K00134', 'K00873'}                     | M00002 |
| RSZYD18187853_A_saliva.metaspades.bin.37                          | {'K02108', 'K02115', 'K02110', 'K02113', 'K02109', 'K02112', 'K02111', 'K02114'} | M00157 |
| R0170300290_tooth_RAH.megahit.bin.111                             | {'K00927', 'K01689', 'K01803', 'K00134', 'K00873'}                               | M00002 |
| R0170300290_tooth_RAH.megahit.bin.111                             | {'K02108', 'K02115', 'K02110', 'K02113', 'K02109', 'K02112', 'K02111', 'K02114'} | M00157 |
| RSZYD18187120_A_saliva.metaspades.bin.19                          | {'K15633', 'K00927', 'K01689', 'K01803', 'K00134', 'K00873'}                     | M00002 |
| RSZYD18187120_A_saliva.metaspades.bin.19                          | {'K00625', 'K00925'}                                                             | M00579 |
| SZAXPI018315-17_RA_dental.metaspades.bin.12                       | {'K01834', 'K01689', 'K00873'}                                                   | M00002 |
| SZAXPI018315-17_RA_dental.metaspades.bin.12                       | {'K02108', 'K02115', 'K02110', 'K02113', 'K02109', 'K02112', 'K02111', 'K02114'} | M00157 |
| GCA_905372225.1_SRR9217401-mag-bin.8_genomic                      | {'K01834', 'K00927', 'K01689', 'K01803', 'K00134', 'K00873'}                     | M00002 |
| R0170300145_tooth_RA.megahit.bin.1                                | {'K15633', 'K00927', 'K01689', 'K01803', 'K00134', 'K00873'}                     | M00002 |
| R0170300145_tooth_RA.megahit.bin.1                                | {'K02108', 'K02115', 'K02110', 'K02113', 'K02109', 'K02112', 'K02111', 'K02114'} | M00157 |
| RDPYD18097607_A_saliva.metaspades.bin.40                          | {'K01834', 'K00927', 'K01689', 'K01803', 'K00134', 'K00873'}                     | M00002 |
| SRR8114009.metaspades.bin.3                                       | {'K01834', 'K00927', 'K01689', 'K01803', 'K00134', 'K00873'}                     | M00002 |
| SRR8114009.metaspades.bin.3                                       | {'K02108', 'K02115', 'K02110', 'K02113', 'K02109', 'K02112', 'K02111', 'K02114'} | M00157 |
| GCA_903832815.1_freshwater_MAG_---_AM-lipid-01-D1_bin-110_genomic | {'K00927', 'K01803', 'K00134', 'K00873'}                                         | M00002 |
| GCA_903832815.1_freshwater_MAG_---_AM-lipid-01-D1_bin-110_genomic | {'K02108', 'K02115', 'K02110', 'K02113', 'K02109', 'K02112', 'K02111', 'K02114'} | M00157 |
| GCA_903832815.1_freshwater_MAG_---_AM-lipid-01-D1_bin-110_genomic | {'K02298', 'K02300', 'K02297', 'K02299'}                                         | M00417 |
| RDPYD18098839_A_saliva.metaspades.bin.19                          | {'K01834', 'K00927', 'K01689', 'K01803', 'K00134', 'K00873'}                     | M00002 |
| RDPYD18098839_A_saliva.metaspades.bin.19                          | {'K02109', 'K02112', 'K02111', 'K02115', 'K02110', 'K02113', 'K02114'}           | M00157 |
| R0170300311_tooth_RAH.megahit.bin.11                              | {'K01834', 'K01689', 'K01803', 'K00134', 'K00873'}                               | M00002 |
| R0170300311_tooth_RAH.megahit.bin.11                              | {'K02108', 'K02115', 'K02110', 'K02113', 'K02109', 'K02112', 'K02111', 'K02114'} | M00157 |
| GCA_010202265.1_ASM1020226v1_genomic                              | {'K01834', 'K00927', 'K01689', 'K01803', 'K00134', 'K00873'}                     | M00002 |
| GCA_010202265.1_ASM1020226v1_genomic                              | {'K02108', 'K02115', 'K02110', 'K02113', 'K02109', 'K02112', 'K02111', 'K02114'} | M00157 |
| RDPYD18300271_A_saliva.metaspades.bin.13                          | {'K01834', 'K00927', 'K01689', 'K01803', 'K00134'}                               | M00002 |
| RDPYD18300271_A_saliva.metaspades.bin.13                          | {'K02112', 'K02111', 'K02115', 'K02114'}                                         | M00157 |
| RDPYD18189868_A_saliva.metaspades.bin.61                          | {'K01834', 'K00927', 'K01689', 'K01803', 'K00134', 'K00873'}                     | M00002 |
| RDPYD18189868_A_saliva.metaspades.bin.61                          | {'K02108', 'K02115', 'K02110', 'K02113', 'K02109', 'K02112', 'K02111', 'K02114'} | M00157 |
| RDPYD18189925_A_saliva.metaspades.bin.14                          | {'K01834', 'K00927', 'K01689', 'K01803', 'K00134', 'K00873'}                     | M00002 |
| RDPYD18189925_A_saliva.metaspades.bin.14                          | {'K02108', 'K02115', 'K02110', 'K02113', 'K02109', 'K02112', 'K02111', 'K02114'} | M00157 |
| YS000462_saliva.spades.bin.8                                      | {'K01834', 'K00927', 'K01689', 'K01803', 'K00134', 'K00873'}                     | M00002 |
| YS000462_saliva.spades.bin.8                                      | {'K02108', 'K02115', 'K02110', 'K02113', 'K02109', 'K02112', 'K02111', 'K02114'} | M00157 |
| GCA_002405335.1_ASM240533v1_genomic                               | {'K00927', 'K01803', 'K00134', 'K00873'}                                         | M00002 |
| GCA_002405335.1_ASM240533v1_genomic                               | {'K02108', 'K02115', 'K02110', 'K02113', 'K02109', 'K02112', 'K02111', 'K02114'} | M00157 |
| GCA_002405335.1_ASM240533v1_genomic                               | {'K02298', 'K02300', 'K02297', 'K02299'}                                         | M00417 |
| GCA_002425145.1_ASM242514v1_genomic                               | {'K00927', 'K01803', 'K00134', 'K00873'}                                         | M00002 |
| GCA_002425145.1_ASM242514v1_genomic                               | {'K02108', 'K02112', 'K02111', 'K02115', 'K02110', 'K02113', 'K02114'}           | M00157 |
| GCA_002425145.1_ASM242514v1_genomic                               | {'K02298', 'K02300', 'K02297', 'K02299'}                                         | M00417 |
| GCA_017652765.1_ASM1765276v1_genomic                              | {'K15633', 'K00927', 'K01689', 'K01803', 'K00134', 'K00873'}                     | M00002 |
| GCA_017652765.1_ASM1765276v1_genomic                              | {'K01897'}                                                                       | M00086 |
| GCA_017652765.1_ASM1765276v1_genomic                              | {'K00625', 'K00925'}                                                             | M00579 |
| YS000754_saliva.spades.bin.30                                     | {'K01834', 'K00927', 'K01689', 'K01803', 'K00134', 'K00873'}                     | M00002 |
| YS000754_saliva.spades.bin.30                                     | {'K02108', 'K02115', 'K02110', 'K02113', 'K02109', 'K02112', 'K02111', 'K02114'} | M00157 |
| R0170300221_tooth_RA.megahit.bin.19                               | {'K01834', 'K01689', 'K01803', 'K00134', 'K00873'}                               | M00002 |
| R0170300221_tooth_RA.megahit.bin.19                               | {'K02108', 'K02115', 'K02110', 'K02113', 'K02109', 'K02112', 'K02111', 'K02114'} | M00157 |
| R0170300065_tooth_RA.megahit.bin.81                               | {'K01834', 'K01689', 'K01803', 'K00134', 'K00873'}                               | M00002 |
| R0170300065_tooth_RA.megahit.bin.81                               | {'K02108', 'K02115', 'K02110', 'K02113', 'K02109', 'K02112', 'K02111', 'K02114'} | M00157 |
| R0170300303_tooth_RAH.megahit.bin.143                             | {'K01834', 'K00927', 'K01689', 'K01803', 'K00134', 'K00873'}                     | M00002 |
| GCA_017515285.1_ASM1751528v1_genomic                              | {'K15633', 'K00927', 'K01689', 'K01803', 'K00134', 'K00873'}                     | M00002 |
| RSZAXPI002318-27_RAH_dental.metaspades.bin.53                     | {'K15633', 'K00927', 'K01689', 'K01803', 'K00134', 'K00873'}                     | M00002 |
| RSZAXPI002318-27_RAH_dental.metaspades.bin.53                     | {'K00625', 'K00925'}                                                             | M00579 |
| R0170300217_tooth_RA.megahit.bin.23                               | {'K01834', 'K00927', 'K01689', 'K01803', 'K00134', 'K00873'}                     | M00002 |
| RDPYD18098844_A_saliva.metaspades.bin.18                          | {'K01834', 'K00927', 'K01689', 'K01803', 'K00134', 'K00873'}                     | M00002 |
| SZAXPI018180-36_RA_dental.metaspades.bin.4                        | {'K01834', 'K01689', 'K01803', 'K00134', 'K00873'}                               | M00002 |
| SZAXPI018180-36_RA_dental.metaspades.bin.4                        | {'K02108', 'K02109', 'K02111', 'K02115', 'K02110', 'K02113'}                     | M00157 |
| RSZYD18187848_A_saliva.metaspades.bin.3                           | {'K01834', 'K00927', 'K01689', 'K01803', 'K00134', 'K00873'}                     | M00002 |
| RSZYD18187848_A_saliva.metaspades.bin.3                           | {'K02108', 'K02109', 'K02111', 'K02115', 'K02110', 'K02113'}                     | M00157 |
| RDPYD18098560_A_saliva.metaspades.bin.42                          | {'K01834', 'K00927', 'K01689', 'K01803', 'K00134', 'K00873'}                     | M00002 |
| GCA_017556795.1_ASM1755679v1_genomic                              | {'K15633', 'K00927', 'K01689', 'K01803', 'K00134', 'K00873'}                     | M00002 |
| GCA_017556795.1_ASM1755679v1_genomic                              | {'K01897'}                                                                       | M00086 |
| GCA_017556795.1_ASM1755679v1_genomic                              | {'K00625', 'K00925'}                                                             | M00579 |
| SZAXPI018320-22_RA_dental.metaspades.bin.29                       | {'K15633', 'K00927', 'K01689', 'K01803', 'K00134', 'K00873'}                     | M00002 |
| SZAXPI018320-22_RA_dental.metaspades.bin.29                       | {'K02108', 'K02115', 'K02110', 'K02113', 'K02109', 'K02112', 'K02111', 'K02114'} | M00157 |
| R0170300156_tooth_RA.megahit.bin.76                               | {'K00927', 'K01689', 'K01803', 'K00134', 'K00873'}                               | M00002 |
| R0170300156_tooth_RA.megahit.bin.76                               | {'K02108', 'K02115', 'K02110', 'K02113', 'K02109', 'K02112', 'K02111', 'K02114'} | M00157 |
| RDPYD18189960_A_saliva.metaspades.bin.59                          | {'K00927', 'K01689', 'K01803', 'K00134', 'K00873'}                               | M00002 |
| RDPYD18189960_A_saliva.metaspades.bin.59                          | {'K02108', 'K02115', 'K02110', 'K02113', 'K02109', 'K02112', 'K02111', 'K02114'} | M00157 |
| R0170300306_tooth_RAH.megahit.bin.102                             | {'K01834', 'K00927', 'K01689', 'K01803', 'K00134', 'K00873'}                     | M00002 |
| GCA_027315225.1_ASM2731522v1_genomic                              | {'K01834', 'K00927', 'K15633', 'K01803', 'K00134', 'K00873'}                     | M00002 |
| GCA_027315225.1_ASM2731522v1_genomic                              | {'K02108', 'K02109', 'K02112', 'K02111', 'K02115', 'K02110', 'K02114'}           | M00157 |
| GCA_027315225.1_ASM2731522v1_genomic                              | {'K02298', 'K02300', 'K02297', 'K02299'}                                         | M00417 |
| RDPYD18300127_A_saliva.metaspades.bin.55                          | {'K01834', 'K00927', 'K01689', 'K01803', 'K00134', 'K00873'}                     | M00002 |
| R0170300149_tooth_RA.megahit.bin.32                               | {'K01834', 'K01689', 'K00873'}                                                   | M00002 |

|                                                                  |                                                                                  |        |
|------------------------------------------------------------------|----------------------------------------------------------------------------------|--------|
| R0170300149 tooth RA.megahit.bin.32                              | {'K02108', 'K02115', 'K02110', 'K02113', 'K02109', 'K02112', 'K02111', 'K02114'} | M00157 |
| R0170300246 tooth RAH.megahit.bin.19                             | {'K01834', 'K00927', 'K01689', 'K01803', 'K00134', 'K00873'}                     | M00002 |
| R0170300246 tooth RAH.megahit.bin.19                             | {'K02108', 'K02115', 'K02110', 'K02113', 'K02109', 'K02112', 'K02111', 'K02114'} | M00157 |
| GCA_947366925.1_SRR15322611_bin.1_metawrap_v1.3_MAG_genomic      | {'K15633', 'K00927', 'K01689', 'K01803', 'K00134', 'K00873'}                     | M00002 |
| GCA_947366925.1_SRR15322611_bin.1_metawrap_v1.3_MAG_genomic      | {'K00625', 'K00925'}                                                             | M00579 |
| GCA_903877025.1_freshwater_MAG_---_AlinenLipids_bin-2261_genomic | {'K00927', 'K15634', 'K01803', 'K00134', 'K00873'}                               | M00002 |
| GCA_903877025.1_freshwater_MAG_---_AlinenLipids_bin-2261_genomic | {'K01897'}                                                                       | M00086 |
| GCA_903877025.1_freshwater_MAG_---_AlinenLipids_bin-2261_genomic | {'K02108', 'K02115', 'K02110', 'K02113', 'K02109', 'K02112', 'K02111', 'K02114'} | M00157 |
| GCA_903877025.1_freshwater_MAG_---_AlinenLipids_bin-2261_genomic | {'K02298', 'K02300', 'K02297', 'K02299'}                                         | M00417 |
| R0170300244 tooth RAH.megahit.bin.80                             | {'K00927', 'K01689', 'K01803', 'K00134', 'K00873'}                               | M00002 |
| R0170300244 tooth RAH.megahit.bin.80                             | {'K02108', 'K02115', 'K02110', 'K02113', 'K02109', 'K02112', 'K02111', 'K02114'} | M00157 |
| RDPYD18097619_A_saliva.metaspades.bin.8                          | {'K01834', 'K00927', 'K01689', 'K01803', 'K00134', 'K00873'}                     | M00002 |
| RDPYD18097619_A_saliva.metaspades.bin.8                          | {'K02108', 'K02115', 'K02110', 'K02113', 'K02109', 'K02112', 'K02111', 'K02114'} | M00157 |
| GCA_027427615.1_ASM2742761v1_genomic                             | {'K00927', 'K01803', 'K00134', 'K00873'}                                         | M00002 |
| GCA_027427615.1_ASM2742761v1_genomic                             | {'K02108', 'K02115', 'K02110', 'K02113', 'K02109', 'K02112', 'K02111', 'K02114'} | M00157 |
| GCA_027427495.1_ASM2742749v1_genomic                             | {'K00927', 'K01803', 'K00134', 'K00873'}                                         | M00002 |
| GCA_027427495.1_ASM2742749v1_genomic                             | {'K02108', 'K02115', 'K02110', 'K02113', 'K02109', 'K02112', 'K02111', 'K02114'} | M00157 |
| RSZAXPI002622-39_RA_saliva.metaspades.bin.19                     | {'K01689', 'K00927', 'K01803', 'K00873'}                                         | M00002 |
| RSZAXPI002622-39_RA_saliva.metaspades.bin.19                     | {'K00625', 'K00925'}                                                             | M00579 |
| YS000376_saliva.spades.bin.26                                    | {'K01834', 'K00927', 'K01689', 'K01803', 'K00134', 'K00873'}                     | M00002 |
| YS000376_saliva.spades.bin.26                                    | {'K02108', 'K02115', 'K02110', 'K02113', 'K02109', 'K02112', 'K02111', 'K02114'} | M00157 |
| RSZYD18078181_A_saliva.metaspades.bin.24                         | {'K15633', 'K00927', 'K01689', 'K01803', 'K00134', 'K00873'}                     | M00002 |
| RSZYD18078181_A_saliva.metaspades.bin.24                         | {'K00625', 'K00925'}                                                             | M00579 |
| GCA_001790625.1_ASM179062v1_genomic                              | {'K02108', 'K02115', 'K02110', 'K02113', 'K02109', 'K02112', 'K02111', 'K02114'} | M00157 |
| GCA_001790625.1_ASM179062v1_genomic                              | {'K02297'}                                                                       | M00417 |
| SRR6748162.metaspades.bin.9                                      | {'K01834', 'K00927', 'K01689', 'K01803', 'K00134', 'K00873'}                     | M00002 |
| SRR6748162.metaspades.bin.9                                      | {'K02108', 'K02115', 'K02110', 'K02113', 'K02109', 'K02112', 'K02111', 'K02114'} | M00157 |
| YS000364_saliva.spades.bin.27                                    | {'K01834', 'K00927', 'K01689', 'K01803', 'K00134', 'K00873'}                     | M00002 |
| YS000364_saliva.spades.bin.27                                    | {'K02108', 'K02115', 'K02110', 'K02113', 'K02109', 'K02112', 'K02111', 'K02114'} | M00157 |
| GCA_002348615.1_ASM234861v1_genomic                              | {'K00927', 'K01803', 'K00134', 'K00873'}                                         | M00002 |
| GCA_002348615.1_ASM234861v1_genomic                              | {'K02108', 'K02109', 'K02112', 'K02111', 'K02115', 'K02110', 'K02114'}           | M00157 |
| GCA_002348615.1_ASM234861v1_genomic                              | {'K02298', 'K02300', 'K02297', 'K02299'}                                         | M00417 |
| GCA_943914775.1_Tcv98XDF6C_bin.50.MAG_genomic                    | {'K01834', 'K01689', 'K01803', 'K00134', 'K00873'}                               | M00002 |
| GCA_943914775.1_Tcv98XDF6C_bin.50.MAG_genomic                    | {'K02108', 'K02115', 'K02110', 'K02113', 'K02109', 'K02112', 'K02111', 'K02114'} | M00157 |
| RDPYD18201616_A_saliva.metaspades.bin.6                          | {'K01834', 'K00927', 'K01689', 'K01803', 'K00134', 'K00873'}                     | M00002 |
| R0170300266 tooth RAH.megahit.bin.12                             | {'K02108', 'K02115', 'K02110', 'K02113', 'K02109', 'K02112', 'K02111', 'K02114'} | M00157 |
| GCA_020428105.1_ASM2042810v1_genomic                             | {'K00927', 'K01803', 'K00134', 'K00873'}                                         | M00002 |
| GCA_020428105.1_ASM2042810v1_genomic                             | {'K02108', 'K02115', 'K02110', 'K02113', 'K02109', 'K02112', 'K02111', 'K02114'} | M00157 |
| GCA_020428105.1_ASM2042810v1_genomic                             | {'K02298', 'K02300', 'K02297', 'K02299'}                                         | M00417 |
| RSZYD18187330_A_saliva.metaspades.bin.30                         | {'K15633', 'K00927', 'K01689', 'K01803', 'K00873'}                               | M00002 |
| RSZYD18187330_A_saliva.metaspades.bin.30                         | {'K00625', 'K00925'}                                                             | M00579 |
| RSZAXPI002619-34_RA_dental.metaspades.bin.39                     | {'K01834', 'K01689', 'K01803', 'K00134', 'K00873'}                               | M00002 |
| RSZAXPI002619-34_RA_dental.metaspades.bin.39                     | {'K02108', 'K02115', 'K02110', 'K02113', 'K02109', 'K02112', 'K02111', 'K02114'} | M00157 |
| SZAXPI018096-17_RA_dental.metaspades.bin.67                      | {'K01834', 'K00927', 'K01689', 'K01803', 'K00134', 'K00873'}                     | M00002 |
| GCA_020428525.1_ASM2042852v1_genomic                             | {'K02112', 'K02111', 'K02115', 'K02114'}                                         | M00157 |
| GCA_005697055.1_ASM569705v1_genomic                              | {'K01834', 'K00927', 'K01689', 'K01803', 'K00134', 'K00873'}                     | M00002 |
| GCA_005697055.1_ASM569705v1_genomic                              | {'K02108', 'K02115', 'K02110', 'K02113', 'K02109', 'K02112', 'K02111', 'K02114'} | M00157 |
| RDPYD18300066_A_saliva.metaspades.bin.10                         | {'K01834', 'K00927', 'K01689', 'K01803', 'K00134', 'K00873'}                     | M00002 |
| RDPYD18300066_A_saliva.metaspades.bin.10                         | {'K02108', 'K02115', 'K02110', 'K02113', 'K02109', 'K02112', 'K02111', 'K02114'} | M00157 |
| GCA_017983575.1_ASM1798357v1_genomic                             | {'K00927', 'K01803', 'K00134', 'K00873'}                                         | M00002 |
| GCA_017983575.1_ASM1798357v1_genomic                             | {'K02108', 'K02115', 'K02110', 'K02113', 'K02109', 'K02112', 'K02111', 'K02114'} | M00157 |
| R0170300308 tooth RAH.megahit.bin.62                             | {'K01834', 'K00927', 'K01689', 'K01803', 'K00134', 'K00873'}                     | M00002 |
| R0170300297 tooth RAH.megahit.bin.78                             | {'K00927', 'K01689', 'K01803', 'K00134', 'K00873'}                               | M00002 |
| R0170300297 tooth RAH.megahit.bin.78                             | {'K02108', 'K02115', 'K02110', 'K02113', 'K02109', 'K02112', 'K02111', 'K02114'} | M00157 |
| YS000205_saliva.spades.bin.1                                     | {'K01834', 'K00927', 'K01689', 'K01803', 'K00134', 'K00873'}                     | M00002 |
| YS000205_saliva.spades.bin.1                                     | {'K02108', 'K02115', 'K02110', 'K02113', 'K02109', 'K02112', 'K02111', 'K02114'} | M00157 |
| YS000921_saliva.spades.bin.23                                    | {'K01834', 'K00927', 'K01803', 'K00873'}                                         | M00002 |
| YS000921_saliva.spades.bin.23                                    | {'K02108', 'K02109', 'K02112', 'K02115', 'K02110', 'K02113', 'K02114'}           | M00157 |
| RSZYD18078111_A_saliva.metaspades.bin.26                         | {'K01834', 'K00927', 'K01689', 'K01803', 'K00134', 'K00873'}                     | M00002 |
| RSZYD18187903_A_saliva.metaspades.bin.45                         | {'K01834', 'K00927', 'K01689', 'K01803', 'K00134', 'K00873'}                     | M00002 |
| RSZYD18187903_A_saliva.metaspades.bin.45                         | {'K02108', 'K02115', 'K02110', 'K02113', 'K02109', 'K02112', 'K02111', 'K02114'} | M00157 |
| R0170300232 tooth RA.megahit.bin.10                              | {'K01834', 'K00927', 'K01689', 'K01803', 'K00134', 'K00873'}                     | M00002 |
| GCA_017404285.1                                                  | {'K15633', 'K00927', 'K01689', 'K01803', 'K00134', 'K00873'}                     | M00002 |
| GCA_017404285.1                                                  | {'K01897'}                                                                       | M00086 |
| GCA_017404285.1                                                  | {'K00925', 'K00625', 'K13788'}                                                   | M00579 |
| RSZAXPI002308-17_RA_dental.metaspades.bin.14                     | {'K15633', 'K00927', 'K01689', 'K01803', 'K00134', 'K00873'}                     | M00002 |
| RSZAXPI002308-17_RA_dental.metaspades.bin.14                     | {'K00625', 'K00925'}                                                             | M00579 |
| YS000236_saliva.spades.bin.20                                    | {'K01834', 'K00927', 'K01689', 'K01803', 'K00134', 'K00873'}                     | M00002 |
| YS000236_saliva.spades.bin.20                                    | {'K02108', 'K02115', 'K02110', 'K02113', 'K02109', 'K02112', 'K02111', 'K02114'} | M00157 |
| GCA_001790525.1_ASM179052v1_genomic                              | {'K00927', 'K15634', 'K01689', 'K01803', 'K00134'}                               | M00002 |
| GCA_001790525.1_ASM179052v1_genomic                              | {'K02108', 'K02115', 'K02110', 'K02113', 'K02109', 'K02112', 'K02111', 'K02114'} | M00157 |
| RSZYD18187841_A_saliva.metaspades.bin.58                         | {'K01834', 'K00927', 'K01689', 'K01803', 'K00134', 'K00873'}                     | M00002 |
| RSZYD18187841_A_saliva.metaspades.bin.58                         | {'K02108', 'K02115', 'K02110', 'K02113', 'K02109', 'K02112', 'K02111', 'K02114'} | M00157 |
| RSZAXPI002470-105_RA_saliva.metaspades.bin.10                    | {'K01834', 'K00927', 'K01689', 'K01803', 'K00134', 'K00873'}                     | M00002 |
| GCA_017613135.1_ASM1761313v1_genomic                             | {'K15633', 'K00927', 'K01689', 'K01803', 'K00134', 'K00873'}                     | M00002 |
| GCA_017613135.1_ASM1761313v1_genomic                             | {'K01897'}                                                                       | M00086 |
| GCA_017613135.1_ASM1761313v1_genomic                             | {'K00625', 'K00925'}                                                             | M00579 |
| GCA_017432505.1                                                  | {'K15633', 'K00927', 'K01689', 'K01803', 'K00134', 'K00873'}                     | M00002 |
| GCA_017432505.1                                                  | {'K01897'}                                                                       | M00086 |
| GCA_017432505.1                                                  | {'K00625', 'K00925'}                                                             | M00579 |
| SZAXPI018291-142_RA_dental.metaspades.bin.37                     | {'K02108', 'K02115', 'K02110', 'K02113', 'K02109', 'K02112', 'K02111', 'K02114'} | M00157 |
| RDPYD18189930_A_saliva.metaspades.bin.8                          | {'K01834', 'K00927', 'K01689', 'K01803', 'K00134', 'K00873'}                     | M00002 |
| RDPYD18189930_A_saliva.metaspades.bin.8                          | {'K02108', 'K02115', 'K02110', 'K02113', 'K02109', 'K02112', 'K02111', 'K02114'} | M00157 |
| GCA_027332225.1_ASM2733222v1_genomic                             | {'K02108', 'K02115', 'K02110', 'K02113', 'K02109', 'K02112', 'K02111', 'K02114'} | M00157 |
| GCA_027332225.1_ASM2733222v1_genomic                             | {'K02298', 'K02300', 'K02297', 'K02299'}                                         | M00417 |
| GCA_905372785.1_SRR9217428-mag-bin.23_genomic                    | {'K00927', 'K01689', 'K01803', 'K00134', 'K00873'}                               | M00002 |
| GCA_905372785.1_SRR9217428-mag-bin.23_genomic                    | {'K02108', 'K02115', 'K02110', 'K02113', 'K02109', 'K02112', 'K02111', 'K02114'} | M00157 |
| GCA_946548715.1_SRR1222429_bin.13_metaWRAP_v1.3_MAG_genomic      | {'K15633', 'K00927', 'K01689', 'K01803', 'K00134', 'K00873'}                     | M00002 |
| GCA_946548715.1_SRR1222429_bin.13_metaWRAP_v1.3_MAG_genomic      | {'K01897'}                                                                       | M00086 |
| GCA_946548715.1_SRR1222429_bin.13_metaWRAP_v1.3_MAG_genomic      | {'K00925', 'K13788'}                                                             | M00579 |
| R0170300252 tooth RAH.megahit.bin.91                             | {'K01834', 'K01689', 'K00873'}                                                   | M00002 |
| R0170300252 tooth RAH.megahit.bin.91                             | {'K02108', 'K02109', 'K02111', 'K02110', 'K02113', 'K02114'}                     | M00157 |
| RDPYD18123880_A_tongue.metaspades.bin.23                         | {'K15633', 'K00927', 'K01689', 'K01803', 'K00134', 'K00873'}                     | M00002 |
| RDPYD18123880_A_tongue.metaspades.bin.23                         | {'K00625', 'K00925'}                                                             | M00579 |
| RDPYD18189833_A_saliva.metaspades.bin.38                         | {'K01834', 'K00927', 'K01689', 'K01803', 'K00134', 'K00873'}                     | M00002 |
| RDPYD18189833_A_saliva.metaspades.bin.38                         | {'K02108', 'K02115', 'K02110', 'K02113', 'K02109', 'K02112', 'K02111', 'K02114'} | M00157 |
| GCA_916439725.1_DRR214962_bin.20_metaWRAP_v1.1_MAG_genomic       | {'K01834', 'K00927', 'K01803', 'K00134', 'K00873'}                               | M00002 |
| GCA_001790435.1_ASM179043v1_genomic                              | {'K00927', 'K01803', 'K00134', 'K00873'}                                         | M00002 |
| GCA_001790435.1_ASM179043v1_genomic                              | {'K02108', 'K02112', 'K02111', 'K02115', 'K02110', 'K02113', 'K02114'}           | M00157 |
| GCA_001790435.1_ASM179043v1_genomic                              | {'K02298', 'K02300', 'K02297', 'K02299'}                                         | M00417 |
| R0170300214 tooth RA.megahit.bin.92                              | {'K00927', 'K01689', 'K01803', 'K00134', 'K00873'}                               | M00002 |
| RDPYD18098900_A_saliva.metaspades.bin.51                         | {'K01834', 'K00927', 'K01689', 'K01803', 'K00134', 'K00873'}                     | M00002 |
| RDPYD18098900_A_saliva.metaspades.bin.51                         | {'K02108', 'K02109', 'K02115', 'K02111', 'K02110', 'K02113', 'K02114'}           | M00157 |
| GCA_017510025.1                                                  | {'K15633', 'K00927', 'K01689', 'K01803', 'K00134', 'K00873'}                     | M00002 |
| GCA_017510025.1                                                  | {'K01897'}                                                                       | M00086 |



|                                                            |                                                                                  |        |
|------------------------------------------------------------|----------------------------------------------------------------------------------|--------|
| GCA_017510025.1                                            | {'K00925', 'K00625', 'K13788'}                                                   | M00579 |
| GCA_015257705.1_ASM1525770v1_genomic                       | {'K01834', 'K00927', 'K01689', 'K01803', 'K00134', 'K00873'}                     | M00002 |
| GCA_015257705.1_ASM1525770v1_genomic                       | {'K02108', 'K02115', 'K02110', 'K02113', 'K02109', 'K02112', 'K02111', 'K02114'} | M00157 |
| GCA_017545525.1_ASM1754552v1_genomic                       | {'K15633', 'K00927', 'K01689', 'K01803', 'K00134', 'K00873'}                     | M00002 |
| GCA_017545525.1_ASM1754552v1_genomic                       | {'K01897'}                                                                       | M00086 |
| R0170300272_tooth_RAH.megahit.bin.87                       | {'K01834', 'K01689', 'K01803', 'K00134', 'K00873'}                               | M00002 |
| R0170300272_tooth_RAH.megahit.bin.87                       | {'K02108', 'K02115', 'K02110', 'K02113', 'K02109', 'K02112', 'K02111', 'K02114'} | M00157 |
| RDPYD18201938_A_saliva.metaspades.bin.16                   | {'K01834', 'K00927', 'K01689', 'K01803', 'K00134', 'K00873'}                     | M00002 |
| R0170300194_tooth_RA.megahit.bin.108                       | {'K15633', 'K00927', 'K01689', 'K01803', 'K00134', 'K00873'}                     | M00002 |
| R0170300194_tooth_RA.megahit.bin.108                       | {'K02108', 'K02115', 'K02110', 'K02113', 'K02109', 'K02112', 'K02111', 'K02114'} | M00157 |
| RDPYD18075171_A_saliva.metaspades.bin.8                    | {'K01834', 'K00927', 'K01689', 'K01803', 'K00134', 'K00873'}                     | M00002 |
| RDPYD18075171_A_saliva.metaspades.bin.8                    | {'K02108', 'K02115', 'K02110', 'K02113', 'K02109', 'K02112', 'K02111', 'K02114'} | M00157 |
| GCA_025450135.1_ASM2545013v1_genomic                       | {'K02108', 'K02109', 'K02112', 'K02111', 'K02115', 'K02110', 'K02114'}           | M00157 |
| GCA_025450135.1_ASM2545013v1_genomic                       | {'K02298', 'K02297'}                                                             | M00417 |
| RDPYD18098916_A_saliva.metaspades.bin.11                   | {'K01834', 'K00927', 'K01689', 'K01803', 'K00134', 'K00873'}                     | M00002 |
| RSZYD18078571_A_saliva.metaspades.bin.52                   | {'K02108', 'K02109', 'K02112', 'K02115', 'K02110', 'K02114'}                     | M00157 |
| GCA_017404685.1                                            | {'K15633', 'K00927', 'K01689', 'K01803', 'K00134', 'K00873'}                     | M00002 |
| GCA_017404685.1                                            | {'K01897'}                                                                       | M00086 |
| GCA_017404685.1                                            | {'K00625', 'K00925'}                                                             | M00579 |
| SZAXPI018282-108_RA_dental.metaspades.bin.30               | {'K00927', 'K01689', 'K01803', 'K00134', 'K00873'}                               | M00002 |
| SZAXPI018282-108_RA_dental.metaspades.bin.30               | {'K02108', 'K02115', 'K02110', 'K02113', 'K02109', 'K02112', 'K02111', 'K02114'} | M00157 |
| SZAXPI018359-24_RA_saliva.metaspades.bin.78                | {'K01834', 'K00927', 'K01689', 'K01803', 'K00134', 'K00873'}                     | M00002 |
| RDPYD18088987_A_saliva.metaspades.bin.6                    | {'K01834', 'K00927', 'K01689', 'K01803', 'K00134', 'K00873'}                     | M00002 |
| RDPYD18088987_A_saliva.metaspades.bin.6                    | {'K02108', 'K02115', 'K02110', 'K02113', 'K02109', 'K02112', 'K02111', 'K02114'} | M00157 |
| SZAXPI018178-34_RA_dental.metaspades.bin.62                | {'K01834', 'K15633', 'K00927', 'K01689', 'K01803', 'K00134', 'K00873'}           | M00002 |
| SZAXPI018178-34_RA_dental.metaspades.bin.62                | {'K02108', 'K02115', 'K02110', 'K02113', 'K02109', 'K02112', 'K02111', 'K02114'} | M00157 |
| R0170300223_tooth_RA.megahit.bin.10                        | {'K15633', 'K00927', 'K01689', 'K01803', 'K00134', 'K00873'}                     | M00002 |
| R0170300223_tooth_RA.megahit.bin.10                        | {'K00625', 'K00925'}                                                             | M00579 |
| R0170300137_tooth_RA.megahit.bin.75                        | {'K01834', 'K01689', 'K01803', 'K00134', 'K00873'}                               | M00002 |
| R0170300137_tooth_RA.megahit.bin.75                        | {'K02108', 'K02115', 'K02110', 'K02113', 'K02109', 'K02112', 'K02111', 'K02114'} | M00157 |
| GCA_027427655.1_ASM2742765v1_genomic                       | {'K00927', 'K01803', 'K00134', 'K00873'}                                         | M00002 |
| GCA_027427655.1_ASM2742765v1_genomic                       | {'K02108', 'K02115', 'K02110', 'K02113', 'K02109', 'K02112', 'K02111', 'K02114'} | M00157 |
| GCA_024697865.1_ASM2469786v1_genomic                       | {'K15633', 'K00927', 'K01689', 'K01803', 'K00134', 'K00873'}                     | M00002 |
| GCA_024697865.1_ASM2469786v1_genomic                       | {'K01897'}                                                                       | M00086 |
| GCA_024697865.1_ASM2469786v1_genomic                       | {'K02108', 'K02115', 'K02110', 'K02113', 'K02109', 'K02112', 'K02111', 'K02114'} | M00157 |
| GCA_905370345.1_DRR046104-mag-bin.8_genomic                | {'K01834', 'K00927', 'K01689', 'K01803', 'K00134', 'K00873'}                     | M00002 |
| GCA_905370345.1_DRR046104-mag-bin.8_genomic                | {'K02108', 'K02115', 'K02110', 'K02113', 'K02109', 'K02112', 'K02111', 'K02114'} | M00157 |
| GCA_002343565.1_ASM234356v1_genomic                        | {'K00927', 'K01803', 'K00134', 'K00873'}                                         | M00002 |
| GCA_002343565.1_ASM234356v1_genomic                        | {'K02108', 'K02115', 'K02110', 'K02113', 'K02109', 'K02112', 'K02111', 'K02114'} | M00157 |
| GCA_002343565.1_ASM234356v1_genomic                        | {'K02298', 'K02300', 'K02297', 'K02299'}                                         | M00417 |
| GCA_017515785.1_ASM1751578v1_genomic                       | {'K15633', 'K00927', 'K01689', 'K01803', 'K00134', 'K00873'}                     | M00002 |
| GCA_017515785.1_ASM1751578v1_genomic                       | {'K01897'}                                                                       | M00086 |
| R0170300279_tooth_RAH.megahit.bin.3                        | {'K15633', 'K00927', 'K01689', 'K01803', 'K00134', 'K00873'}                     | M00002 |
| R0170300279_tooth_RAH.megahit.bin.3                        | {'K00625', 'K00925'}                                                             | M00579 |
| SZAXPI018492-24_RA_saliva.metaspades.bin.47                | {'K15633', 'K00927', 'K01689', 'K01803', 'K00134', 'K00873'}                     | M00002 |
| SZAXPI018492-24_RA_saliva.metaspades.bin.47                | {'K00625', 'K00925'}                                                             | M00579 |
| R0170300197_tooth_RA.megahit.bin.71                        | {'K01834', 'K00927', 'K01689', 'K01803', 'K00134', 'K00873'}                     | M00002 |
| R0170300197_tooth_RA.megahit.bin.71                        | {'K02108', 'K02115', 'K02110', 'K02113', 'K02109', 'K02112', 'K02111', 'K02114'} | M00157 |
| YS000607_saliva.spades.bin.9                               | {'K01834', 'K00927', 'K01689', 'K01803', 'K00134', 'K00873'}                     | M00002 |
| YS000607_saliva.spades.bin.9                               | {'K02108', 'K02109', 'K02110', 'K02113'}                                         | M00157 |
| R0170300260_tooth_RAH.megahit.bin.14                       | {'K15633', 'K00927', 'K01689', 'K01803', 'K00134', 'K00873'}                     | M00002 |
| R0170300260_tooth_RAH.megahit.bin.14                       | {'K02108', 'K02115', 'K02110', 'K02113', 'K02109', 'K02112', 'K02111', 'K02114'} | M00157 |
| GCA_022828375.1_ASM2282837v1_genomic                       | {'K01834', 'K00927', 'K01689', 'K01803', 'K00134', 'K00873'}                     | M00002 |
| GCA_022828375.1_ASM2282837v1_genomic                       | {'K02108', 'K02115', 'K02110', 'K02113', 'K02109', 'K02112', 'K02111', 'K02114'} | M00157 |
| GCA_927910745.1_ERR3827327_bin.3_metaWRAP_v1.1_MAG_genomic | {'K01834', 'K01689', 'K01803', 'K00873'}                                         | M00002 |
| GCA_927910745.1_ERR3827327_bin.3_metaWRAP_v1.1_MAG_genomic | {'K02108', 'K02115', 'K02110', 'K02113', 'K02109', 'K02112', 'K02111', 'K02114'} | M00157 |
| SZAXPI018279-94_RA_dental.metaspades.bin.16                | {'K01834', 'K00927', 'K01689', 'K01803', 'K00873'}                               | M00002 |
| GCA_017510905.1                                            | {'K15633', 'K00927', 'K01689', 'K01803', 'K00134', 'K00873'}                     | M00002 |
| GCA_017510905.1                                            | {'K01897'}                                                                       | M00086 |
| R0170300153_tooth_RA.megahit.bin.106                       | {'K00927', 'K01689', 'K01803', 'K00134', 'K00873'}                               | M00002 |
| R0170300153_tooth_RA.megahit.bin.106                       | {'K02108', 'K02115', 'K02110', 'K02113', 'K02109', 'K02112', 'K02111', 'K02114'} | M00157 |
| GCA_027427575.1_ASM2742757v1_genomic                       | {'K00927', 'K01803', 'K00134', 'K00873'}                                         | M00002 |
| GCA_027427575.1_ASM2742757v1_genomic                       | {'K02108', 'K02115', 'K02110', 'K02113', 'K02109', 'K02112', 'K02111', 'K02114'} | M00157 |
| RSZYD18187064_A_saliva.metaspades.bin.52                   | {'K01834', 'K00927', 'K01689', 'K01803', 'K00134', 'K00873'}                     | M00002 |
| RSZYD18187064_A_saliva.metaspades.bin.52                   | {'K02108', 'K02109', 'K02112', 'K02115', 'K02110', 'K02113', 'K02114'}           | M00157 |
| RSZAXPI002331-56_RAH_dental.metaspades.bin.43              | {'K00927', 'K01689', 'K01803', 'K00134', 'K00873'}                               | M00002 |
| RSZAXPI002331-56_RAH_dental.metaspades.bin.43              | {'K02108', 'K02115', 'K02110', 'K02113', 'K02109', 'K02112', 'K02111', 'K02114'} | M00157 |
| RSZYD18078152_A_saliva.metaspades.bin.41                   | {'K01834', 'K00927', 'K01689', 'K01803', 'K00134', 'K00873'}                     | M00002 |
| RSZYD18078152_A_saliva.metaspades.bin.41                   | {'K02108', 'K02115', 'K02110', 'K02113', 'K02109', 'K02112', 'K02111', 'K02114'} | M00157 |
| R0170300356_saliva_RA.megahit.bin.101                      | {'K01834', 'K00927', 'K01689', 'K01803', 'K00873'}                               | M00002 |
| RSZYD18078325_A_saliva.metaspades.bin.95                   | {'K15633', 'K00927', 'K01689', 'K01803', 'K00134', 'K00873'}                     | M00002 |
| RSZYD18078325_A_saliva.metaspades.bin.95                   | {'K00625', 'K00925'}                                                             | M00579 |
| RSZYD18078438_A_saliva.metaspades.bin.6                    | {'K01834', 'K00927', 'K01689', 'K01803', 'K00134', 'K00873'}                     | M00002 |
| RSZYD18078438_A_saliva.metaspades.bin.6                    | {'K02108', 'K02109', 'K02112', 'K02111', 'K02110', 'K02113', 'K02114'}           | M00157 |
| RDPYD18098308_A_saliva.metaspades.bin.70                   | {'K01834', 'K00927', 'K01689', 'K01803', 'K00134', 'K00873'}                     | M00002 |
| R0170300149_tooth_RA.megahit.bin.28                        | {'K01834', 'K00927', 'K01689', 'K01803', 'K00134', 'K00873'}                     | M00002 |
| GCA_001029695.1_ASM102969v1_genomic                        | {'K00927', 'K01803', 'K00134', 'K00873'}                                         | M00002 |
| GCA_001029695.1_ASM102969v1_genomic                        | {'K02108', 'K02115', 'K02110', 'K02113', 'K02109', 'K02112', 'K02111', 'K02114'} | M00157 |
| RSZYD18187382_A_saliva.metaspades.bin.10                   | {'K01834', 'K00927', 'K01689', 'K01803', 'K00134', 'K00873'}                     | M00002 |
| RDPYD18098341_A_saliva.metaspades.bin.33                   | {'K01834', 'K00927', 'K01689', 'K01803', 'K00873'}                               | M00002 |
| RDPYD18098341_A_saliva.metaspades.bin.33                   | {'K02108', 'K02115', 'K02110', 'K02113', 'K02109', 'K02112', 'K02111', 'K02114'} | M00157 |
| RSZYD18187023_A_saliva.metaspades.bin.32                   | {'K01834', 'K00927', 'K01689', 'K01803', 'K00134', 'K00873'}                     | M00002 |
| RSZYD18078747_A_saliva.metaspades.bin.1                    | {'K00927', 'K01689', 'K01803', 'K00134', 'K00873'}                               | M00002 |
| RSZYD18078747_A_saliva.metaspades.bin.1                    | {'K02108', 'K02115', 'K02110', 'K02113', 'K02109', 'K02112', 'K02111', 'K02114'} | M00157 |
| GCA_027427215.1_ASM2742721v1_genomic                       | {'K02108', 'K02115', 'K02110', 'K02113', 'K02109', 'K02112', 'K02111', 'K02114'} | M00157 |
| GCA_027427215.1_ASM2742721v1_genomic                       | {'K02298', 'K02300', 'K02297', 'K02299'}                                         | M00417 |
| RDPYD18300036_A_saliva.metaspades.bin.53                   | {'K00927', 'K01689', 'K01803', 'K00134', 'K00873'}                               | M00002 |
| RDPYD18300036_A_saliva.metaspades.bin.53                   | {'K00625', 'K00925'}                                                             | M00579 |
| GCA_013394755.1_ASM1339475v1_genomic                       | {'K01834', 'K00927', 'K01689', 'K01803', 'K00134', 'K00873'}                     | M00002 |
| GCA_013394755.1_ASM1339475v1_genomic                       | {'K02108', 'K02115', 'K02110', 'K02113', 'K02109', 'K02112', 'K02111', 'K02114'} | M00157 |
| YS000581_saliva.spades.bin.8                               | {'K01834', 'K00927', 'K01689', 'K01803', 'K00134', 'K00873'}                     | M00002 |
| YS000581_saliva.spades.bin.8                               | {'K02108', 'K02115', 'K02110', 'K02113', 'K02109', 'K02112', 'K02111', 'K02114'} | M00157 |
| RDPYD18098470_A_saliva.metaspades.bin.42                   | {'K01834', 'K00927', 'K01689', 'K01803', 'K00134', 'K00873'}                     | M00002 |
| R0170300189_tooth_RA.megahit.bin.1                         | {'K01834', 'K01689', 'K01803', 'K00873'}                                         | M00002 |
| R0170300189_tooth_RA.megahit.bin.1                         | {'K02108', 'K02115', 'K02110', 'K02113', 'K02109', 'K02112', 'K02111', 'K02114'} | M00157 |
| R0170300117_tooth_RA.megahit.bin.12                        | {'K01834', 'K01689', 'K01803', 'K00134', 'K00873'}                               | M00002 |
| R0170300117_tooth_RA.megahit.bin.12                        | {'K02108', 'K02115', 'K02110', 'K02113', 'K02109', 'K02112', 'K02111', 'K02114'} | M00157 |
| GCA_918593335.1_timonensis_genomic                         | {'K01834', 'K00927', 'K01689', 'K01803', 'K00134', 'K00873'}                     | M00002 |
| GCA_918593335.1_timonensis_genomic                         | {'K02108', 'K02115', 'K02110', 'K02113', 'K02109', 'K02112', 'K02111', 'K02114'} | M00157 |
| GCA_002371895.1_ASM237189v1_genomic                        | {'K00927', 'K01689', 'K01803', 'K00134', 'K00873'}                               | M00002 |
| GCA_002371895.1_ASM237189v1_genomic                        | {'K01897'}                                                                       | M00086 |
| GCA_002371895.1_ASM237189v1_genomic                        | {'K00625', 'K00925'}                                                             | M00579 |
| R0170300213_tooth_RA.megahit.bin.121                       | {'K00927', 'K01689', 'K01803', 'K00134', 'K00873'}                               | M00002 |
| RSZAXPI002682-32_RA_saliva.metaspades.bin.12               | {'K01834', 'K00927', 'K01689', 'K01803', 'K00134', 'K00873'}                     | M00002 |
| RSZAXPI002682-32_RA_saliva.metaspades.bin.12               | {'K02108', 'K02115', 'K02110', 'K02113', 'K02109', 'K02112', 'K02111', 'K02114'} | M00157 |



|                                                                 |                                                                                  |        |
|-----------------------------------------------------------------|----------------------------------------------------------------------------------|--------|
| RSZYD18078590 A_saliva.metaspades.bin.50                        | {'K01834', 'K00927', 'K01689', 'K01803', 'K00134', 'K00873'}                     | M00002 |
| RSZYD18187739 A_saliva.metaspades.bin.22                        | {'K15633', 'K00927', 'K01689', 'K01803', 'K00134', 'K00873'}                     | M00002 |
| GCA_009691435.1_ASM969143v1_genomic                             | {'K01689', 'K00927', 'K01803', 'K00134'}                                         | M00002 |
| GCA_009691435.1_ASM969143v1_genomic                             | {'K02112', 'K02111', 'K02115', 'K02113', 'K02114'}                               | M00157 |
| GCA_017511645.1                                                 | {'K01897'}                                                                       | M00086 |
| GCA_017511645.1                                                 | {'K00625', 'K00925'}                                                             | M00579 |
| RSZYD18078212 A_saliva.metaspades.bin.24                        | {'K01834', 'K01689', 'K00134', 'K00873'}                                         | M00002 |
| RSZYD18078212 A_saliva.metaspades.bin.24                        | {'K02108', 'K02115', 'K02110', 'K02113', 'K02109', 'K02112', 'K02111', 'K02114'} | M00157 |
| RSZYD18187244 A_saliva.metaspades.bin.38                        | {'K01834', 'K00927', 'K01689', 'K01803', 'K00134', 'K00873'}                     | M00002 |
| RSZYD18187244 A_saliva.metaspades.bin.38                        | {'K02108', 'K02115', 'K02110', 'K02113', 'K02109', 'K02112', 'K02111', 'K02114'} | M00157 |
| RSZYD18187344 A_saliva.metaspades.bin.34                        | {'K01834', 'K00927', 'K01689', 'K01803', 'K00134', 'K00873'}                     | M00002 |
| RSZYD18187344 A_saliva.metaspades.bin.34                        | {'K02108', 'K02115', 'K02110', 'K02113', 'K02109', 'K02112', 'K02111', 'K02114'} | M00157 |
| RSZAXPI002319-31_RAH_dental.metaspades.bin.72                   | {'K15633', 'K00927', 'K01689', 'K01803', 'K00134', 'K00873'}                     | M00002 |
| RSZAXPI002319-31_RAH_dental.metaspades.bin.72                   | {'K02108', 'K02115', 'K02110', 'K02113', 'K02109', 'K02112', 'K02111', 'K02114'} | M00157 |
| GCA_946890805.1_SRR12830918_bin.6_metaWRAP_v1.3_MAG_genomic     | {'K01834', 'K00927', 'K01689', 'K01803', 'K00134', 'K00873'}                     | M00002 |
| GCA_946890805.1_SRR12830918_bin.6_metaWRAP_v1.3_MAG_genomic     | {'K01897'}                                                                       | M00086 |
| GCA_017511845.1                                                 | {'K15633', 'K00927', 'K01689', 'K01803', 'K00134', 'K00873'}                     | M00002 |
| GCA_017511845.1                                                 | {'K01897'}                                                                       | M00086 |
| GCA_017511845.1                                                 | {'K00625', 'K00925'}                                                             | M00579 |
| GCA_017545595.1_ASM1754559v1_genomic                            | {'K15633', 'K00927', 'K01689', 'K01803', 'K00134', 'K00873'}                     | M00002 |
| YS000625_saliva.spades.bin.29                                   | {'K01834', 'K00927', 'K01689', 'K01803', 'K00134', 'K00873'}                     | M00002 |
| YS000625_saliva.spades.bin.29                                   | {'K02108', 'K02115', 'K02110', 'K02113', 'K02109', 'K02112', 'K02111', 'K02114'} | M00157 |
| GCA_947296925.1_SRR19390379_bin.6_metawrap_v1.3_MAG_genomic     | {'K15633', 'K00927', 'K01689', 'K01803', 'K00134', 'K00873'}                     | M00002 |
| GCA_947296925.1_SRR19390379_bin.6_metawrap_v1.3_MAG_genomic     | {'K00925', 'K00625', 'K13788'}                                                   | M00579 |
| GCA_027340605.1_ASM2734060v1_genomic                            | {'K15634', 'K00927', 'K01803', 'K00134'}                                         | M00002 |
| GCA_027340605.1_ASM2734060v1_genomic                            | {'K02108', 'K02115', 'K02110', 'K02113', 'K02109', 'K02112', 'K02111', 'K02114'} | M00157 |
| GCA_027340605.1_ASM2734060v1_genomic                            | {'K02298', 'K02300', 'K02297', 'K02299'}                                         | M00417 |
| R0170300175_tooth_RA.megahit.bin.20                             | {'K00927', 'K01689', 'K01803', 'K00134', 'K00873'}                               | M00002 |
| R0170300175_tooth_RA.megahit.bin.20                             | {'K02108', 'K02115', 'K02110', 'K02113', 'K02109', 'K02112', 'K02111', 'K02114'} | M00157 |
| GCA_013815785.1_ASM1381578v1_genomic                            | {'K00927', 'K01803', 'K00134', 'K00873'}                                         | M00002 |
| GCA_013815785.1_ASM1381578v1_genomic                            | {'K02108', 'K02109', 'K02112', 'K02111', 'K02115', 'K02110', 'K02114'}           | M00157 |
| GCA_013815785.1_ASM1381578v1_genomic                            | {'K02298', 'K02300', 'K02297', 'K02299'}                                         | M00417 |
| RSZYD18078167 A_saliva.metaspades.bin.4                         | {'K01834', 'K00927', 'K01689', 'K01803', 'K00134', 'K00873'}                     | M00002 |
| RSZYD18078167 A_saliva.metaspades.bin.4                         | {'K02108', 'K02115', 'K02110', 'K02113', 'K02109', 'K02112', 'K02111', 'K02114'} | M00157 |
| R0170300214_tooth_RA.megahit.bin.54                             | {'K00927', 'K01689', 'K01803', 'K00134', 'K00873'}                               | M00002 |
| R0170300214_tooth_RA.megahit.bin.54                             | {'K02108', 'K02115', 'K02110', 'K02113', 'K02109', 'K02112', 'K02111', 'K02114'} | M00157 |
| GCA_017510925.1                                                 | {'K15633', 'K00927', 'K01689', 'K01803', 'K00134', 'K00873'}                     | M00002 |
| GCA_017510925.1                                                 | {'K01897'}                                                                       | M00086 |
| RSZAXPI002681-31_RA_saliva.metaspades.bin.57                    | {'K01834', 'K00927', 'K01689', 'K01803', 'K00134', 'K00873'}                     | M00002 |
| RSZAXPI002681-31_RA_saliva.metaspades.bin.57                    | {'K02108', 'K02115', 'K02110', 'K02113', 'K02109', 'K02112', 'K02111', 'K02114'} | M00157 |
| RSZYD18078648 A_saliva.metaspades.bin.16                        | {'K01834', 'K00927', 'K01689', 'K01803', 'K00134', 'K00873'}                     | M00002 |
| RSZYD18078648 A_saliva.metaspades.bin.16                        | {'K02108', 'K02115', 'K02110', 'K02113', 'K02109', 'K02112', 'K02111', 'K02114'} | M00157 |
| GCA_027427675.1_ASM2742767v1_genomic                            | {'K00927', 'K01803', 'K00134', 'K00873'}                                         | M00002 |
| GCA_027427675.1_ASM2742767v1_genomic                            | {'K02108', 'K02115', 'K02110', 'K02113', 'K02109', 'K02112', 'K02111', 'K02114'} | M00157 |
| R0170300202_tooth_RA.megahit.bin.34                             | {'K00927', 'K01689', 'K01803', 'K00134', 'K00873'}                               | M00002 |
| R0170300202_tooth_RA.megahit.bin.34                             | {'K02108', 'K02115', 'K02110', 'K02113', 'K02109', 'K02112', 'K02111', 'K02114'} | M00157 |
| RSZYD18187460 A_saliva.metaspades.bin.2                         | {'K01834', 'K00927', 'K01689', 'K01803', 'K00134', 'K00873'}                     | M00002 |
| RSZYD18187460 A_saliva.metaspades.bin.2                         | {'K02108', 'K02115', 'K02110', 'K02113', 'K02109', 'K02112', 'K02111', 'K02114'} | M00157 |
| GCA_903946795.1_freshwater_MAG_---_Loc090907-4m_bin-620_genomic | {'K00927', 'K01803', 'K00134', 'K00873'}                                         | M00002 |
| GCA_903946795.1_freshwater_MAG_---_Loc090907-4m_bin-620_genomic | {'K02108', 'K02109', 'K02111', 'K02110', 'K02113'}                               | M00157 |
| YS000161_saliva.spades.bin.8                                    | {'K01834', 'K00927', 'K01803', 'K00134', 'K00873'}                               | M00002 |
| R0170300181_tooth_RA.megahit.bin.83                             | {'K00927', 'K01689', 'K01803', 'K00134', 'K00873'}                               | M00002 |
| R0170300181_tooth_RA.megahit.bin.83                             | {'K02108', 'K02115', 'K02110', 'K02113', 'K02109', 'K02112', 'K02111', 'K02114'} | M00157 |
| GCA_017404725.1                                                 | {'K00927', 'K01689', 'K01803', 'K00134', 'K00873'}                               | M00002 |
| RSZYD18187065 A_saliva.metaspades.bin.38                        | {'K01834', 'K00927', 'K01689', 'K01803', 'K00134', 'K00873'}                     | M00002 |
| RSZYD18187065 A_saliva.metaspades.bin.38                        | {'K02108', 'K02115', 'K02110', 'K02113', 'K02109', 'K02112', 'K02111', 'K02114'} | M00157 |
| RSZYD18078172 A_saliva.metaspades.bin.34                        | {'K01834', 'K00927', 'K01689', 'K01803', 'K00134', 'K00873'}                     | M00002 |
| RSZYD18078172 A_saliva.metaspades.bin.34                        | {'K02108', 'K02115', 'K02110', 'K02113', 'K02109', 'K02112', 'K02111', 'K02114'} | M00157 |
| R0170300287_tooth_RAH.megahit.bin.57                            | {'K15633', 'K00927', 'K01689', 'K01803', 'K00134', 'K00873'}                     | M00002 |
| R0170300287_tooth_RAH.megahit.bin.57                            | {'K02108', 'K02115', 'K02110', 'K02113', 'K02109', 'K02112', 'K02111', 'K02114'} | M00157 |
| GCA_900757685.1_ERS537356_50_genomic                            | {'K01834', 'K00927', 'K01689', 'K01803', 'K00134', 'K00873'}                     | M00002 |
| GCA_900757685.1_ERS537356_50_genomic                            | {'K02108', 'K02115', 'K02110', 'K02113', 'K02109', 'K02112', 'K02111', 'K02114'} | M00157 |
| GCA_943358135.1_MsH-01oct19-288_genomic                         | {'K00927', 'K01803', 'K00134', 'K00873'}                                         | M00002 |
| GCA_943358135.1_MsH-01oct19-288_genomic                         | {'K02108', 'K02115', 'K02110', 'K02113', 'K02109', 'K02112', 'K02111', 'K02114'} | M00157 |
| GCA_016187175.1_ASM1618717v1_genomic                            | {'K02108', 'K02115', 'K02110', 'K02113', 'K02109', 'K02112', 'K02111', 'K02114'} | M00157 |
| RSZYD18078570 A_saliva.metaspades.bin.17                        | {'K01834', 'K00927', 'K01689', 'K01803', 'K00134', 'K00873'}                     | M00002 |
| YS000234_saliva.spades.bin.16                                   | {'K01834', 'K00927', 'K01689', 'K01803', 'K00134', 'K00873'}                     | M00002 |
| YS000234_saliva.spades.bin.16                                   | {'K02108', 'K02115', 'K02110', 'K02113', 'K02109', 'K02112', 'K02111', 'K02114'} | M00157 |
| RSZAXPI002609-25_RA_dental.metaspades.bin.20                    | {'K01834', 'K01689', 'K00873'}                                                   | M00002 |
| RSZAXPI002609-25_RA_dental.metaspades.bin.20                    | {'K02108', 'K02115', 'K02110', 'K02113', 'K02109', 'K02112', 'K02111', 'K02114'} | M00157 |
| GCA_019352195.1_ASM1935219v1_genomic                            | {'K01834', 'K00927', 'K01689', 'K01803', 'K00134', 'K00873'}                     | M00002 |
| GCA_019352195.1_ASM1935219v1_genomic                            | {'K02108', 'K02112', 'K02111', 'K02115', 'K02110', 'K02113', 'K02114'}           | M00157 |
| GCA_019352195.1_ASM1935219v1_genomic                            | {'K02298', 'K02300', 'K02297', 'K02299'}                                         | M00417 |
| GCA_003022365.1_ASM302236v1_genomic                             | {'K00927', 'K01803', 'K00134', 'K00873'}                                         | M00002 |
| GCA_003022365.1_ASM302236v1_genomic                             | {'K02112', 'K02111', 'K02115', 'K02114'}                                         | M00157 |
| SZAXPI018191-57_RA_dental.metaspades.bin.69                     | {'K00927', 'K01689', 'K01803', 'K00134', 'K00873'}                               | M00002 |
| SZAXPI018191-57_RA_dental.metaspades.bin.69                     | {'K02108', 'K02115', 'K02110', 'K02113', 'K02109', 'K02112', 'K02111', 'K02114'} | M00157 |
| GCA_946411665.1_SRR12081298_bin.32_metaWRAP_v1.3_MAG_genomic    | {'K15633', 'K00927', 'K01689', 'K00134', 'K00873'}                               | M00002 |
| GCA_946411665.1_SRR12081298_bin.32_metaWRAP_v1.3_MAG_genomic    | {'K00925', 'K00625', 'K13788'}                                                   | M00579 |
| R0170300208_tooth_RA.megahit.bin.81                             | {'K15633', 'K00927', 'K01689', 'K01803', 'K00134', 'K00873'}                     | M00002 |
| R0170300208_tooth_RA.megahit.bin.81                             | {'K02108', 'K02115', 'K02110', 'K02113', 'K02109', 'K02112', 'K02111', 'K02114'} | M00157 |
| GCA_017460305.1                                                 | {'K15633', 'K00927', 'K01689', 'K01803', 'K00134'}                               | M00002 |
| GCA_017460305.1                                                 | {'K01897'}                                                                       | M00086 |
| GCA_017460305.1                                                 | {'K00625', 'K00925'}                                                             | M00579 |
| R0170300338_saliva_RA.megahit.bin.56                            | {'K00927', 'K01689', 'K01803', 'K00134', 'K00873'}                               | M00002 |
| R0170300338_saliva_RA.megahit.bin.56                            | {'K02108', 'K02109', 'K02112', 'K02111', 'K02110', 'K02113', 'K02114'}           | M00157 |
| GCA_014377525.1_ASM1437752v1_genomic                            | {'K00927', 'K15634', 'K01803', 'K00134', 'K00873'}                               | M00002 |
| GCA_014377525.1_ASM1437752v1_genomic                            | {'K02108', 'K02115', 'K02110', 'K02113', 'K02109', 'K02112', 'K02111', 'K02114'} | M00157 |
| GCA_014377525.1_ASM1437752v1_genomic                            | {'K02298', 'K02300', 'K02297', 'K02299'}                                         | M00417 |
| RSZYD18187123 A_saliva.metaspades.bin.13                        | {'K01834', 'K00927', 'K01689', 'K01803', 'K00134', 'K00873'}                     | M00002 |
| RSZYD18187123 A_saliva.metaspades.bin.13                        | {'K02108', 'K02115', 'K02110', 'K02113', 'K02109', 'K02112', 'K02111', 'K02114'} | M00157 |
| SZAXPI018320-22_RA_dental.metaspades.bin.15                     | {'K00927', 'K01689', 'K01803', 'K00134', 'K00873'}                               | M00002 |
| SZAXPI018320-22_RA_dental.metaspades.bin.15                     | {'K02108', 'K02115', 'K02110', 'K02113', 'K02109', 'K02112', 'K02111', 'K02114'} | M00157 |
| R0170300056_tooth_RA.megahit.bin.105                            | {'K00927', 'K01689', 'K01803', 'K00134', 'K00873'}                               | M00002 |
| R0170300056_tooth_RA.megahit.bin.105                            | {'K00925', 'K00625', 'K13788'}                                                   | M00579 |
| YS000906_saliva.spades.bin.34                                   | {'K01834', 'K00927', 'K01689', 'K01803', 'K00134'}                               | M00002 |
| YS000906_saliva.spades.bin.34                                   | {'K02108', 'K02115', 'K02110', 'K02113', 'K02109', 'K02112', 'K02111', 'K02114'} | M00157 |
| GCA_010202465.1_ASM1020246v1_genomic                            | {'K01834', 'K00927', 'K01689', 'K01803', 'K00134', 'K00873'}                     | M00002 |
| GCA_010202465.1_ASM1020246v1_genomic                            | {'K02108', 'K02109', 'K02112', 'K02111', 'K02115', 'K02110', 'K02114'}           | M00157 |
| R0170300053_tooth_RA.megahit.bin.84                             | {'K01834', 'K01689', 'K01803', 'K00134', 'K00873'}                               | M00002 |
| R0170300053_tooth_RA.megahit.bin.84                             | {'K02108', 'K02115', 'K02110', 'K02113', 'K02109', 'K02112', 'K02111', 'K02114'} | M00157 |
| GCA_002304695.1_ASM230469v1_genomic                             | {'K02108', 'K02109', 'K02112', 'K02115', 'K02110', 'K02113', 'K02114'}           | M00157 |
| GCA_002304695.1_ASM230469v1_genomic                             | {'K02298', 'K02300', 'K02297', 'K02299'}                                         | M00417 |
| R0170300133_tooth_RA.megahit.bin.51                             | {'K00927', 'K01689', 'K01803', 'K00134', 'K00873'}                               | M00002 |
| R0170300133_tooth_RA.megahit.bin.51                             | {'K02108', 'K02115', 'K02110', 'K02113', 'K02109', 'K02112', 'K02111', 'K02114'} | M00157 |

|                                                                    |                                                                           |        |
|--------------------------------------------------------------------|---------------------------------------------------------------------------|--------|
| RSZYD18187327 A saliva.metaspades.bin.15                           | {'K00625','K00925'}                                                       | M00579 |
| RSZYD18078228 A saliva.metaspades.bin.31                           | {'K01834','K00927','K01689','K01803','K00134','K00873'}                   | M00002 |
| RSZYD18078228 A saliva.metaspades.bin.31                           | {'K02108','K02115','K02110','K02113','K02109','K02112','K02111','K02114'} | M00157 |
| RDPYD18098964 A saliva.metaspades.bin.45                           | {'K01834','K00927','K01689','K01803','K00134','K00873'}                   | M00002 |
| RDPYD18098964 A saliva.metaspades.bin.45                           | {'K02108','K02115','K02110','K02113','K02109','K02112','K02111','K02114'} | M00157 |
| GCA_017404335.1                                                    | {'K15633','K00927','K01689','K01803','K00134','K00873'}                   | M00002 |
| GCA_017404335.1                                                    | {'K01897'}                                                                | M00086 |
| GCA_017404335.1                                                    | {'K00925','K13788'}                                                       | M00579 |
| GCA_947425995.1_SRR19981123_bin.1_metawrap_v1.3_MAG_genomic        | {'K15633','K00927','K01689','K01803','K00134','K00873'}                   | M00002 |
| R0170300267 tooth RAH.megahit.bin.18                               | {'K00927','K01689','K01803','K00134','K00873'}                            | M00002 |
| R0170300304 tooth RAH.megahit.bin.45                               | {'K01834','K00927','K01689','K01803','K00134','K00873'}                   | M00002 |
| R0170300304 tooth RAH.megahit.bin.45                               | {'K02108','K02109','K02112','K02111','K02115','K02110','K02114'}          | M00157 |
| RSZAXPI002326-41_RAH_dental.metaspades.bin.62                      | {'K15633','K00927','K01689','K01803','K00134','K00873'}                   | M00002 |
| RSZAXPI002326-41_RAH_dental.metaspades.bin.62                      | {'K02108','K02115','K02110','K02113','K02109','K02112','K02111','K02114'} | M00157 |
| YS000135 saliva.spades.bin.9                                       | {'K01834','K00927','K01689','K01803','K00134','K00873'}                   | M00002 |
| YS000135 saliva.spades.bin.9                                       | {'K02108','K02115','K02110','K02113','K02109','K02112','K02111','K02114'} | M00157 |
| RSZYD18187656 A saliva.metaspades.bin.41                           | {'K01834','K00927','K01689','K01803','K00134','K00873'}                   | M00002 |
| RSZYD18187656 A saliva.metaspades.bin.41                           | {'K02108','K02115','K02110','K02113','K02109','K02112','K02111','K02114'} | M00157 |
| R0170300161 tooth RA.megahit.bin.150                               | {'K15633','K00927','K01689','K01803','K00134','K00873'}                   | M00002 |
| R0170300161 tooth RA.megahit.bin.150                               | {'K00625','K00925'}                                                       | M00579 |
| RDPYD18300227 A saliva.metaspades.bin.33                           | {'K00927','K01689','K01803','K00134','K00873'}                            | M00002 |
| RDPYD18300227 A saliva.metaspades.bin.33                           | {'K02108','K02115','K02110','K02113','K02109','K02112','K02111','K02114'} | M00157 |
| YS000057 saliva.spades.bin.9                                       | {'K01834','K00927','K01803','K00134','K00873'}                            | M00002 |
| YS000057 saliva.spades.bin.9                                       | {'K02108','K02115','K02110','K02113','K02109','K02112','K02111','K02114'} | M00157 |
| GCA_007845485.1_ASM784548v1_genomic                                | {'K00927','K01689','K01803','K00134','K00873'}                            | M00002 |
| GCA_007845485.1_ASM784548v1_genomic                                | {'K02108','K02115','K02110','K02113','K02109','K02112','K02111','K02114'} | M00157 |
| RSZAXPI002470-105_2_RAH_saliva.metaspades.bin.33                   | {'K01834','K00927','K01689','K01803','K00134','K00873'}                   | M00002 |
| RSZYD18078489 A saliva.metaspades.bin.18                           | {'K01834','K00927','K01689','K01803','K00134','K00873'}                   | M00002 |
| RSZYD18078489 A saliva.metaspades.bin.18                           | {'K02108','K02115','K02110','K02113','K02109','K02112','K02111','K02114'} | M00157 |
| R0170300196 tooth RA.megahit.bin.11                                | {'K01834','K01689','K00873'}                                              | M00002 |
| R0170300196 tooth RA.megahit.bin.11                                | {'K02108','K02115','K02110','K02113','K02109','K02112','K02111','K02114'} | M00157 |
| R0170300061 tooth RA.megahit.bin.12                                | {'K01834','K01689','K00873'}                                              | M00002 |
| R0170300061 tooth RA.megahit.bin.12                                | {'K02108','K02115','K02110','K02113','K02109','K02112','K02111','K02114'} | M00157 |
| R0170300392 saliva RAH.megahit.bin.14                              | {'K15633','K00927','K01689','K01803','K00134','K00873'}                   | M00002 |
| R0170300392 saliva RAH.megahit.bin.14                              | {'K00625','K00925'}                                                       | M00579 |
| SZAXPI018280-95_RA_dental.metaspades.bin.19                        | {'K01834','K00927','K01689','K01803','K00134','K00873'}                   | M00002 |
| GCA_903859325.1_freshwater_MAG_---_AM-lipid-02-D3_bin-0230_genomic | {'K00927','K01803','K00134','K00873'}                                     | M00002 |
| GCA_903859325.1_freshwater_MAG_---_AM-lipid-02-D3_bin-0230_genomic | {'K02108','K02109','K02112','K02111','K02115','K02110','K02114'}          | M00157 |
| GCA_903859325.1_freshwater_MAG_---_AM-lipid-02-D3_bin-0230_genomic | {'K02298','K02300','K02297','K02299'}                                     | M00417 |
| YS000216 saliva.spades.bin.15                                      | {'K01834','K00927','K01689','K01803','K00134','K00873'}                   | M00002 |
| YS000216 saliva.spades.bin.15                                      | {'K02108','K02109','K02112','K02111','K02115','K02110','K02114'}          | M00157 |
| RSZYD18187540 A saliva.metaspades.bin.35                           | {'K01834','K00927','K01689','K01803','K00134'}                            | M00002 |
| RSZYD18187540 A saliva.metaspades.bin.35                           | {'K02108','K02115','K02110','K02113','K02109','K02112','K02111','K02114'} | M00157 |
| SZAXPI018394-33_RA_saliva.metaspades.bin.17                        | {'K15633','K00927','K01689','K01803','K00134','K00873'}                   | M00002 |
| SZAXPI018394-33_RA_saliva.metaspades.bin.17                        | {'K00625','K00925'}                                                       | M00579 |
| RSZAXPI002314-23_RAH_dental.metaspades.bin.51                      | {'K15633','K00927','K01689','K00134','K00873'}                            | M00002 |
| RSZAXPI002314-23_RAH_dental.metaspades.bin.51                      | {'K02108','K02115','K02110','K02113','K02109','K02112','K02111','K02114'} | M00157 |
| R0170300118 tooth RA.megahit.bin.46                                | {'K01834','K00927','K01689','K01803','K00134','K00873'}                   | M00002 |
| R0170300056 tooth RA.megahit.bin.17                                | {'K00927','K01689','K01803','K00134','K00873'}                            | M00002 |
| R0170300056 tooth RA.megahit.bin.17                                | {'K02108','K02115','K02110','K02113','K02109','K02112','K02111','K02114'} | M00157 |
| RDPYD18300091 A saliva.metaspades.bin.39                           | {'K01834','K00927','K01689','K01803','K00134','K00873'}                   | M00002 |
| SZAXPI018318-20_RA_dental.metaspades.bin.22                        | {'K01834','K00927','K01689','K01803','K00134','K00873'}                   | M00002 |
| R0170300300 tooth RAH.megahit.bin.1                                | {'K15633','K00927','K01689','K01803','K00134','K00873'}                   | M00002 |
| R0170300300 tooth RAH.megahit.bin.1                                | {'K02108','K02115','K02110','K02113','K02109','K02112','K02111','K02114'} | M00157 |
| GCA_017991755.1_ASM1799175v1_genomic                               | {'K00927','K01689','K01803','K00134','K00873'}                            | M00002 |
| GCA_017991755.1_ASM1799175v1_genomic                               | {'K02108','K02115','K02110','K02113','K02109','K02112','K02111','K02114'} | M00157 |
| R0170300158 tooth RA.megahit.bin.24                                | {'K00927','K01689','K01803','K00134','K00873'}                            | M00002 |
| R0170300158 tooth RA.megahit.bin.24                                | {'K02108','K02115','K02110','K02113','K02109','K02112','K02111','K02114'} | M00157 |
| R0170300230 tooth RA.megahit.bin.36                                | {'K15633','K00927','K01689','K01803','K00134','K00873'}                   | M00002 |
| R0170300230 tooth RA.megahit.bin.36                                | {'K00625','K00925'}                                                       | M00579 |
| R0170300305 tooth RAH.megahit.bin.21                               | {'K00927','K01689','K01803','K00134','K00873'}                            | M00002 |
| R0170300305 tooth RAH.megahit.bin.21                               | {'K02108','K02109','K02112','K02111','K02115','K02110','K02113'}          | M00157 |
| R0170300129 tooth RA.megahit.bin.41                                | {'K15633','K00927','K01689','K01803','K00134','K00873'}                   | M00002 |
| R0170300129 tooth RA.megahit.bin.41                                | {'K00925','K00625','K13788'}                                              | M00579 |
| GCA_947087275.1_SRR14038240_bin.4_metawrap_v1.3_MAG_genomic        | {'K15633','K00927','K01689','K01803','K00134','K00873'}                   | M00002 |
| GCA_947087275.1_SRR14038240_bin.4_metawrap_v1.3_MAG_genomic        | {'K00625','K00925'}                                                       | M00579 |
| GCA_016699895.1_ASM1669989v1_genomic                               | {'K01834','K00927','K15634','K01689','K01803','K00134','K00873'}          | M00002 |
| GCA_016699895.1_ASM1669989v1_genomic                               | {'K02108','K02115','K02110','K02113','K02109','K02112','K02111','K02114'} | M00157 |
| GCA_013100845.1_ASM1310084v1_genomic                               | {'K01834','K00927','K01689','K01803','K00134','K00873'}                   | M00002 |
| GCA_013100845.1_ASM1310084v1_genomic                               | {'K02108','K02115','K02110','K02113','K02109','K02112','K02111','K02114'} | M00157 |
| SZAXPI018190-56_RA_dental.metaspades.bin.64                        | {'K15633','K00927','K01689','K01803','K00134','K00873'}                   | M00002 |
| SZAXPI018190-56_RA_dental.metaspades.bin.64                        | {'K02108','K02115','K02110','K02113','K02109','K02112','K02111','K02114'} | M00157 |
| YS000438 saliva.spades.bin.9                                       | {'K01834','K00927','K01689','K01803','K00134','K00873'}                   | M00002 |
| YS000438 saliva.spades.bin.9                                       | {'K02108','K02109','K02111','K02115','K02110','K02113','K02114'}          | M00157 |
| R0170300127 tooth RA.megahit.bin.43                                | {'K00927','K01689','K01803','K00134','K00873'}                            | M00002 |
| R0170300127 tooth RA.megahit.bin.43                                | {'K02108','K02115','K02110','K02113','K02109','K02112','K02111','K02114'} | M00157 |
| SZAXPI018358-23_RA_saliva.metaspades.bin.53                        | {'K15633','K00927','K01689','K01803','K00134','K00873'}                   | M00002 |
| SZAXPI018358-23_RA_saliva.metaspades.bin.53                        | {'K00625','K00925'}                                                       | M00579 |
| RSZYD18078354 A saliva.metaspades.bin.16                           | {'K01834','K00927','K01689','K01803','K00134','K00873'}                   | M00002 |
| RSZYD18078354 A saliva.metaspades.bin.16                           | {'K02108','K02115','K02110','K02113','K02109','K02112','K02111','K02114'} | M00157 |
| R0170300121 tooth RA.megahit.bin.4                                 | {'K15633','K00927','K01689','K01803','K00134','K00873'}                   | M00002 |
| R0170300121 tooth RA.megahit.bin.4                                 | {'K00625','K00925'}                                                       | M00579 |
| RDPYD18300381 A saliva.metaspades.bin.93                           | {'K01834','K00927','K01689','K01803','K00134','K00873'}                   | M00002 |
| R0170300285 tooth RAH.megahit.bin.48                               | {'K15633','K00927','K01689','K01803','K00134','K00873'}                   | M00002 |
| R0170300285 tooth RAH.megahit.bin.48                               | {'K00625','K00925'}                                                       | M00579 |
| RSZYD18187676 A saliva.metaspades.bin.32                           | {'K01834','K00927','K01689','K01803','K00134','K00873'}                   | M00002 |
| RSZYD18187676 A saliva.metaspades.bin.32                           | {'K02108','K02115','K02110','K02113','K02109','K02112','K02111','K02114'} | M00157 |
| GCA_027427535.1_ASM2742753v1_genomic                               | {'K00927','K01803','K00134','K00873'}                                     | M00002 |
| GCA_027427535.1_ASM2742753v1_genomic                               | {'K02108','K02115','K02110','K02113','K02109','K02112','K02111','K02114'} | M00157 |
| RSZYD18078042 A saliva.metaspades.bin.39                           | {'K01834','K01689','K00873'}                                              | M00002 |
| RSZYD18078042 A saliva.metaspades.bin.39                           | {'K02108','K02115','K02110','K02113','K02109','K02112','K02111','K02114'} | M00157 |
| GCA_015257505.1_ASM1525750v1_genomic                               | {'K15633','K00927','K01689','K01803','K00134','K00873'}                   | M00002 |
| GCA_015257505.1_ASM1525750v1_genomic                               | {'K00625','K00925'}                                                       | M00579 |
| RSZYD18078697 A saliva.metaspades.bin.17                           | {'K01834','K00927','K01689','K01803','K00134','K00873'}                   | M00002 |
| RSZYD18078697 A saliva.metaspades.bin.17                           | {'K02108','K02115','K02110','K02113','K02109','K02112','K02111','K02114'} | M00157 |
| RDPYD18300101 A saliva.metaspades.bin.91                           | {'K15633','K00927','K01689','K01803','K00134','K00873'}                   | M00002 |
| RDPYD18300101 A saliva.metaspades.bin.91                           | {'K00625','K00925'}                                                       | M00579 |
| YS000348 saliva.spades.bin.15                                      | {'K01834','K00927','K01689','K01803','K00134','K00873'}                   | M00002 |
| YS000348 saliva.spades.bin.15                                      | {'K02108','K02115','K02110','K02113','K02109','K02112','K02111','K02114'} | M00157 |
| YS001130 saliva.spades.bin.26                                      | {'K00927','K01689','K01803','K00134','K00873'}                            | M00002 |
| YS001130 saliva.spades.bin.26                                      | {'K02108','K02109','K02112','K02111','K02115','K02110','K02113'}          | M00157 |
| GCA_020912025.1_ASM2091202v1_genomic                               | {'K01834','K00927','K01689','K01803','K00134','K00873'}                   | M00002 |
| GCA_020912025.1_ASM2091202v1_genomic                               | {'K02108','K02115','K02110','K02113','K02109','K02112','K02111','K02114'} | M00157 |
| GCA_022736555.1_ASM2273655v1_genomic                               | {'K02112','K02111','K02115','K02114'}                                     | M00157 |
| RDPYD18201938 A saliva.metaspades.bin.59                           | {'K01834','K00927','K01689','K01803','K00134','K00873'}                   | M00002 |



|                                                              |                                                                           |        |
|--------------------------------------------------------------|---------------------------------------------------------------------------|--------|
| RSZYD18187184_A_saliva.metaspades.bin.14                     | {'K15633','K00927','K01689','K01803','K00134','K00873'}                   | M00002 |
| RSZYD18187184_A_saliva.metaspades.bin.14                     | {'K00625','K00925'}                                                       | M00579 |
| RDPYD18099005_A_saliva.metaspades.bin.66                     | {'K01834','K00927','K01689','K01803','K00134','K00873'}                   | M00002 |
| RDPYD18099005_A_saliva.metaspades.bin.66                     | {'K02108','K02115','K02110','K02113','K02109','K02112','K02111','K02114'} | M00157 |
| R0170300100_tooth_RA.megahit.bin.107                         | {'K00927','K01689','K01803','K00134','K00873'}                            | M00002 |
| R0170300100_tooth_RA.megahit.bin.107                         | {'K02108','K02115','K02110','K02113','K02109','K02112','K02111','K02114'} | M00157 |
| SZAXPI018103-24_RA_dental.metaspades.bin.40                  | {'K00625','K00925'}                                                       | M00579 |
| RSZYD18187537_A_saliva.metaspades.bin.50                     | {'K15633','K00927','K01689','K01803','K00134','K00873'}                   | M00002 |
| RSZYD18187537_A_saliva.metaspades.bin.50                     | {'K00625','K00925'}                                                       | M00579 |
| GCA_946890795.1_SRR12830924_bin.6_metaWRAP_v1.3_MAG_genomic  | {'K01834','K00927','K01689','K01803','K00134','K00873'}                   | M00002 |
| GCA_946890795.1_SRR12830924_bin.6_metaWRAP_v1.3_MAG_genomic  | {'K01897'}                                                                | M00086 |
| R0170300105_tooth_RA.megahit.bin.119                         | {'K00927','K01689','K01803','K00134','K00873'}                            | M00002 |
| R0170300105_tooth_RA.megahit.bin.119                         | {'K02108','K02115','K02110','K02113','K02109','K02112','K02111','K02114'} | M00157 |
| SZAXPI018441-109_RA_saliva.metaspades.bin.47                 | {'K01834','K01689','K01803','K00873'}                                     | M00002 |
| SZAXPI018441-109_RA_saliva.metaspades.bin.47                 | {'K02108','K02115','K02110','K02113','K02109','K02112','K02111','K02114'} | M00157 |
| RSZYD18078217_A_saliva.metaspades.bin.41                     | {'K01834','K00927','K01689','K01803','K00134','K00873'}                   | M00002 |
| RSZYD18078217_A_saliva.metaspades.bin.41                     | {'K02108','K02115','K02110','K02113','K02109','K02112','K02111','K02114'} | M00157 |
| R0170300251_tooth_RAH.megahit.bin.36                         | {'K01834','K00927','K01689','K01803','K00134','K00873'}                   | M00002 |
| RDPYD18300275_A_saliva.metaspades.bin.16                     | {'K01834','K00927','K01689','K01803','K00134','K00873'}                   | M00002 |
| RDPYD18300275_A_saliva.metaspades.bin.16                     | {'K02108','K02115','K02110','K02113','K02109','K02112','K02111','K02114'} | M00157 |
| RSZAXPI002305-14_RAH_dental.metaspades.bin.64                | {'K01834','K00927','K01689','K01803','K00134','K00873'}                   | M00002 |
| R0170300106_tooth_RA.megahit.bin.39                          | {'K01834','K00927','K01689','K01803','K00134','K00873'}                   | M00002 |
| RSZYD18187425_A_saliva.metaspades.bin.18                     | {'K01834','K00927','K01689','K01803','K00134','K00873'}                   | M00002 |
| RSZYD18187425_A_saliva.metaspades.bin.18                     | {'K02108','K02115','K02110','K02113','K02109','K02112','K02111','K02114'} | M00157 |
| GCA_017512095.1                                              | {'K15633','K00927','K01803','K00134','K00873'}                            | M00002 |
| GCA_017512095.1                                              | {'K01897'}                                                                | M00086 |
| SZAXPI018292-158_RA_dental.metaspades.bin.62                 | {'K01834','K01689','K01803','K00134','K00873'}                            | M00002 |
| SZAXPI018292-158_RA_dental.metaspades.bin.62                 | {'K02108','K02115','K02110','K02113','K02109','K02112','K02111','K02114'} | M00157 |
| R0170300228_tooth_RA.megahit.bin.112                         | {'K00927','K01689','K01803','K00134','K00873'}                            | M00002 |
| R0170300228_tooth_RA.megahit.bin.112                         | {'K02108','K02115','K02110','K02113','K02109','K02112','K02111','K02114'} | M00157 |
| GCA_002404125.1_ASM240412v1_genomic                          | {'K00927','K15634','K01803','K00134','K00873'}                            | M00002 |
| GCA_002404125.1_ASM240412v1_genomic                          | {'K02108','K02115','K02110','K02113','K02109','K02112','K02111','K02114'} | M00157 |
| GCA_002404125.1_ASM240412v1_genomic                          | {'K02298','K02300','K02297'}                                              | M00417 |
| RSZYD18078746_A_saliva.metaspades.bin.2                      | {'K01834','K00927','K01689','K01803','K00134'}                            | M00002 |
| RSZYD18078746_A_saliva.metaspades.bin.2                      | {'K02108','K02109','K02110','K02113'}                                     | M00157 |
| RSZYD18187542_A_saliva.metaspades.bin.26                     | {'K01834','K01689','K00873'}                                              | M00002 |
| RSZYD18187542_A_saliva.metaspades.bin.26                     | {'K02108','K02109','K02110','K02113'}                                     | M00157 |
| SZAXPI018171-25_1_RA_dental.metaspades.bin.5                 | {'K15633','K00927','K15634','K01689','K01803','K00134','K00873'}          | M00002 |
| SZAXPI018171-25_1_RA_dental.metaspades.bin.5                 | {'K00625','K00925'}                                                       | M00579 |
| RSZYD18187801_A_saliva.metaspades.bin.74                     | {'K01834','K00927','K15634','K01689','K01803','K00873'}                   | M00002 |
| R0170300272_tooth_RAH.megahit.bin.14                         | {'K01834','K00927','K01689','K01803','K00134','K00873'}                   | M00002 |
| R0170300110_tooth_RA.megahit.bin.88                          | {'K15633','K00927','K01689','K01803','K00134','K00873'}                   | M00002 |
| R0170300110_tooth_RA.megahit.bin.88                          | {'K00625','K00925'}                                                       | M00579 |
| GCA_947388495.1_SRR15214593_bin.20_metawrap_v1.3_MAG_genomic | {'K15633','K00927','K01689','K01803','K00134','K00873'}                   | M00002 |
| GCA_947388495.1_SRR15214593_bin.20_metawrap_v1.3_MAG_genomic | {'K00625','K00925'}                                                       | M00579 |
| R0170300269_tooth_RAH.megahit.bin.4                          | {'K00927','K01689','K01803','K00134','K00873'}                            | M00002 |
| R0170300269_tooth_RAH.megahit.bin.4                          | {'K02108','K02115','K02110','K02113','K02109','K02112','K02111','K02114'} | M00157 |
| RSZAXPI002629-81_RA_dental.metaspades.bin.76                 | {'K02109','K02112','K02111','K02115','K02110','K02113','K02114'}          | M00157 |
| GCA_010202845.1_ASM1020284v1_genomic                         | {'K01834','K00927','K01689','K01803','K00134','K00873'}                   | M00002 |
| GCA_010202845.1_ASM1020284v1_genomic                         | {'K02108','K02109','K02112','K02111','K02115','K02110','K02114'}          | M00157 |
| GCA_013333495.2_ASM1333349v2_genomic                         | {'K00927','K01689','K01803','K00134','K00873'}                            | M00002 |
| GCA_013333495.2_ASM1333349v2_genomic                         | {'K02108','K02115','K02110','K02113','K02109','K02112','K02111','K02114'} | M00157 |
| YS000725_saliva.spades.bin.43                                | {'K01834','K00927','K01689','K01803','K00134','K00873'}                   | M00002 |
| YS000725_saliva.spades.bin.43                                | {'K02108','K02115','K02110','K02113','K02109','K02112','K02111','K02114'} | M00157 |
| SZAXPI018097-18_RA_dental.metaspades.bin.14                  | {'K15633','K00927','K01689','K01803','K00134','K00873'}                   | M00002 |
| SZAXPI018097-18_RA_dental.metaspades.bin.14                  | {'K00625','K00925'}                                                       | M00579 |
| GCA_005697565.1_ASM569756v1_genomic                          | {'K01834','K00927','K01689','K01803','K00134','K00873'}                   | M00002 |
| GCA_005697565.1_ASM569756v1_genomic                          | {'K02108','K02115','K02110','K02113','K02109','K02112','K02111','K02114'} | M00157 |
| RDPYD18098785_A_saliva.metaspades.bin.37                     | {'K01834','K00927','K01803','K00134','K00873'}                            | M00002 |
| RSZYD18187361_A_saliva.metaspades.bin.8                      | {'K00927','K01689','K01803','K00134','K00873'}                            | M00002 |
| RSZYD18187361_A_saliva.metaspades.bin.8                      | {'K02108','K02115','K02110','K02113','K02109','K02112','K02111','K02114'} | M00157 |
| GCA_013694995.1_ASM1369499v1_genomic                         | {'K00927','K01803','K00134','K00873'}                                     | M00002 |
| GCA_013694995.1_ASM1369499v1_genomic                         | {'K02108','K02109','K02112','K02111','K02115','K02110','K02114'}          | M00157 |
| GCA_013694995.1_ASM1369499v1_genomic                         | {'K02298','K02300','K02297'}                                              | M00417 |
| R0170300078_tooth_RA.megahit.bin.29                          | {'K15633','K00927','K01689','K01803','K00134','K00873'}                   | M00002 |
| R0170300078_tooth_RA.megahit.bin.29                          | {'K00625','K00925'}                                                       | M00579 |
| R0170300252_tooth_RAH.megahit.bin.46                         | {'K15633','K00927','K01689','K01803','K00134','K00873'}                   | M00002 |
| R0170300252_tooth_RAH.megahit.bin.46                         | {'K02108','K02115','K02110','K02113','K02109','K02112','K02111','K02114'} | M00157 |
| GCA_002482925.1_ASM248292v1_genomic                          | {'K00927','K01803','K00134','K00873'}                                     | M00002 |
| GCA_002482925.1_ASM248292v1_genomic                          | {'K02108','K02109','K02111','K02115','K02113'}                            | M00157 |
| R0170300062_tooth_RA.megahit.bin.52                          | {'K00927','K01689','K01803','K00134','K00873'}                            | M00002 |
| R0170300062_tooth_RA.megahit.bin.52                          | {'K02108','K02115','K02110','K02113','K02109','K02112','K02111','K02114'} | M00157 |
| GCA_017480035.1                                              | {'K15633','K00927','K01689','K01803','K00134','K00873'}                   | M00002 |
| GCA_017480035.1                                              | {'K00625','K00925'}                                                       | M00579 |
| R0170300260_tooth_RAH.megahit.bin.16                         | {'K01834','K01689','K01803','K00134','K00873'}                            | M00002 |
| R0170300260_tooth_RAH.megahit.bin.16                         | {'K02108','K02115','K02110','K02113','K02109','K02112','K02111','K02114'} | M00157 |
| RSZAXPI002308-17_RAH_dental.metaspades.bin.47                | {'K00927','K01689','K01803','K00134','K00873'}                            | M00002 |
| RSZAXPI002308-17_RAH_dental.metaspades.bin.47                | {'K02108','K02115','K02110','K02113','K02109','K02112','K02111','K02114'} | M00157 |
| RSZAXPI002324-37_RAH_dental.metaspades.bin.77                | {'K00927','K01689','K01803','K00134','K00873'}                            | M00002 |
| RSZAXPI002324-37_RAH_dental.metaspades.bin.77                | {'K02108','K02115','K02110','K02113','K02109','K02112','K02111','K02114'} | M00157 |
| GCA_017432025.1                                              | {'K01834','K15633','K00927','K01689','K00134','K00873'}                   | M00002 |
| GCA_017432025.1                                              | {'K01897'}                                                                | M00086 |
| GCA_017432025.1                                              | {'K00625','K00925'}                                                       | M00579 |
| GCA_017540725.1_ASM1754072v1_genomic                         | {'K00625','K00925'}                                                       | M00579 |
| GCA_946530965.1_SRR873598_bin.145_metaWRAP_v1.3_MAG_genomic  | {'K15633','K00927','K01689','K01803','K00134','K00873'}                   | M00002 |
| GCA_946530965.1_SRR873598_bin.145_metaWRAP_v1.3_MAG_genomic  | {'K00925','K00625','K13788'}                                              | M00579 |
| R0170300229_tooth_RA.megahit.bin.108                         | {'K15633','K00927','K01689','K01803','K00134','K00873'}                   | M00002 |
| R0170300229_tooth_RA.megahit.bin.108                         | {'K00925','K00625','K13788'}                                              | M00579 |
| GCA_017510205.1                                              | {'K15633','K00927','K01689','K01803','K00134','K00873'}                   | M00002 |
| GCA_017510205.1                                              | {'K01897'}                                                                | M00086 |
| GCA_017510205.1                                              | {'K00925','K13788'}                                                       | M00579 |
| RDPYD18300291_A_saliva.metaspades.bin.51                     | {'K01834','K00927','K01689','K01803','K00134','K00873'}                   | M00002 |
| RDPYD18300291_A_saliva.metaspades.bin.51                     | {'K02108','K02115','K02110','K02113','K02109','K02112','K02111','K02114'} | M00157 |
| GCA_947246665.1_SRR14920969_bin.19_metawrap_v1.3_MAG_genomic | {'K15633','K00927','K01689','K01803','K00134','K00873'}                   | M00002 |
| GCA_947246665.1_SRR14920969_bin.19_metawrap_v1.3_MAG_genomic | {'K00625','K00925'}                                                       | M00579 |
| RSZAXPI002316-25_RAH_dental.metaspades.bin.41                | {'K02108','K02115','K02110','K02113','K02109','K02112','K02111','K02114'} | M00157 |
| RSZYD18187057_A_saliva.metaspades.bin.25                     | {'K01834','K00927','K01689','K01803','K00134','K00873'}                   | M00002 |
| RSZYD18187057_A_saliva.metaspades.bin.25                     | {'K02108','K02115','K02110','K02113','K02109','K02112','K02111','K02114'} | M00157 |
| GCA_947565505.1_SRR19759417_bin.86_metawrap_v1.3_MAG_genomic | {'K15633','K00927','K01803','K00134','K00873'}                            | M00002 |
| GCA_947565505.1_SRR19759417_bin.86_metawrap_v1.3_MAG_genomic | {'K00625','K00925'}                                                       | M00579 |
| RSZAXPI002458-89_RAH_dental.metaspades.bin.11                | {'K00927','K01689','K01803','K00134','K00873'}                            | M00002 |
| RSZAXPI002458-89_RAH_dental.metaspades.bin.11                | {'K02108','K02115','K02110','K02113','K02109','K02112','K02111','K02114'} | M00157 |
| R0170300052_tooth_RA.megahit.bin.177                         | {'K01834','K01689','K01803','K00134','K00873'}                            | M00002 |
| R0170300052_tooth_RA.megahit.bin.177                         | {'K02108','K02115','K02110','K02113','K02109','K02112','K02111','K02114'} | M00157 |
| RSZYD18187344_A_saliva.metaspades.bin.53                     | {'K01834','K00927','K01689','K01803','K00134','K00873'}                   | M00002 |



|                                                              |                                                                                  |        |
|--------------------------------------------------------------|----------------------------------------------------------------------------------|--------|
| R0170300151 tooth RA.megahit.bin.9                           | {'K15633', 'K00927', 'K01689', 'K01803', 'K00134', 'K00873'}                     | M00002 |
| R0170300151 tooth RA.megahit.bin.9                           | {'K02108', 'K02115', 'K02110', 'K02113', 'K02109', 'K02112', 'K02111', 'K02114'} | M00157 |
| R0170300257 tooth RAH.megahit.bin.108                        | {'K01834', 'K01689', 'K00873'}                                                   | M00002 |
| R0170300257 tooth RAH.megahit.bin.108                        | {'K02108', 'K02115', 'K02110', 'K02113', 'K02109', 'K02112', 'K02111', 'K02114'} | M00157 |
| SZAXPI018322-24 RA_dental.metaspades.bin.11                  | {'K15633', 'K00927', 'K01689', 'K01803', 'K00134', 'K00873'}                     | M00002 |
| SZAXPI018322-24 RA_dental.metaspades.bin.11                  | {'K00625', 'K00925'}                                                             | M00579 |
| RSZYD18078076 A_saliva.metaspades.bin.41                     | {'K01834', 'K00927', 'K01689', 'K01803', 'K00134', 'K00873'}                     | M00002 |
| RSZYD18078076 A_saliva.metaspades.bin.41                     | {'K02108', 'K02115', 'K02110', 'K02113', 'K02109', 'K02112', 'K02111', 'K02114'} | M00157 |
| R0170300051 tooth RA.megahit.bin.53                          | {'K01834', 'K01689', 'K00873'}                                                   | M00002 |
| R0170300051 tooth RA.megahit.bin.53                          | {'K02108', 'K02115', 'K02110', 'K02113', 'K02109', 'K02112', 'K02111', 'K02114'} | M00157 |
| GCA_016432585.1 ASM1643258v1_genomic                         | {'K01834', 'K00927', 'K15634', 'K01689', 'K01803', 'K00134', 'K00873'}           | M00002 |
| GCA_016432585.1 ASM1643258v1_genomic                         | {'K02108', 'K02115', 'K02110', 'K02113', 'K02109', 'K02112', 'K02111', 'K02114'} | M00157 |
| GCA_016432585.1 ASM1643258v1_genomic                         | {'K02298', 'K02300', 'K02297', 'K02299'}                                         | M00417 |
| R0170300258 tooth RAH.megahit.bin.9                          | {'K15633', 'K00927', 'K01689', 'K01803', 'K00134', 'K00873'}                     | M00002 |
| R0170300258 tooth RAH.megahit.bin.9                          | {'K00625', 'K00925'}                                                             | M00579 |
| R0170300202 tooth RA.megahit.bin.65                          | {'K15633', 'K00927', 'K01689', 'K01803', 'K00134', 'K00873'}                     | M00002 |
| R0170300202 tooth RA.megahit.bin.65                          | {'K02108', 'K02110'}                                                             | M00157 |
| R0170300202 tooth RA.megahit.bin.65                          | {'K00625', 'K00925'}                                                             | M00579 |
| R0170300114 tooth RA.megahit.bin.56                          | {'K02108', 'K02115', 'K02110', 'K02113', 'K02109', 'K02112', 'K02111', 'K02114'} | M00157 |
| SRR6748164.metaspades.bin.5                                  | {'K01834', 'K00927', 'K01689', 'K01803', 'K00134', 'K00873'}                     | M00002 |
| SRR6748164.metaspades.bin.5                                  | {'K02108', 'K02115', 'K02110', 'K02113', 'K02109', 'K02112', 'K02111', 'K02114'} | M00157 |
| RSZYD18078188 A_saliva.metaspades.bin.16                     | {'K01834', 'K00927', 'K01689', 'K01803', 'K00873'}                               | M00002 |
| RSZYD18078188 A_saliva.metaspades.bin.16                     | {'K02108', 'K02109', 'K02111', 'K02115', 'K02110', 'K02113'}                     | M00157 |
| GCA_010202645.1 ASM1020264v1_genomic                         | {'K01834', 'K00927', 'K01689', 'K01803', 'K00134', 'K00873'}                     | M00002 |
| GCA_010202645.1 ASM1020264v1_genomic                         | {'K02108', 'K02109', 'K02112', 'K02111', 'K02115', 'K02110', 'K02114'}           | M00157 |
| RSZYD18187427 A_saliva.metaspades.bin.75                     | {'K01834', 'K00927', 'K01689', 'K01803', 'K00134', 'K00873'}                     | M00002 |
| RSZYD18187427 A_saliva.metaspades.bin.75                     | {'K02108', 'K02115', 'K02110', 'K02113', 'K02109', 'K02112', 'K02111', 'K02114'} | M00157 |
| R0170300321 tooth RAH.megahit.bin.21                         | {'K00927', 'K01689', 'K01803', 'K00134', 'K00873'}                               | M00002 |
| R0170300321 tooth RAH.megahit.bin.21                         | {'K02108', 'K02115', 'K02110', 'K02113', 'K02109', 'K02112', 'K02111', 'K02114'} | M00157 |
| GCA_946619905.1 SRR873600 bin.141 metaWRAP v1.3 MAG_genomic  | {'K00927', 'K01689', 'K01803', 'K00134', 'K00873'}                               | M00002 |
| GCA_946619905.1 SRR873600 bin.141 metaWRAP v1.3 MAG_genomic  | {'K01897'}                                                                       | M00086 |
| GCA_946619905.1 SRR873600 bin.141 metaWRAP v1.3 MAG_genomic  | {'K00625', 'K00925'}                                                             | M00579 |
| R0170300203 tooth RA.megahit.bin.29                          | {'K01834', 'K00927', 'K01689', 'K01803', 'K00134', 'K00873'}                     | M00002 |
| GCA_900556885.1 UMGS1986_genomic                             | {'K00927', 'K01689', 'K01803', 'K00134', 'K00873'}                               | M00002 |
| GCA_900556885.1 UMGS1986_genomic                             | {'K02108', 'K02115', 'K02110', 'K02113', 'K02109', 'K02112', 'K02111', 'K02114'} | M00157 |
| RSZYD18187458 A_saliva.metaspades.bin.36                     | {'K01834', 'K00927', 'K01689', 'K01803', 'K00134', 'K00873'}                     | M00002 |
| R0170300193 tooth RA.megahit.bin.72                          | {'K01834', 'K01689', 'K01803', 'K00134', 'K00873'}                               | M00002 |
| R0170300193 tooth RA.megahit.bin.72                          | {'K02108', 'K02115', 'K02110', 'K02113', 'K02109', 'K02112', 'K02111', 'K02114'} | M00157 |
| R0170300311 tooth RAH.megahit.bin.87                         | {'K00927', 'K01689', 'K01803', 'K00134', 'K00873'}                               | M00002 |
| R0170300311 tooth RAH.megahit.bin.87                         | {'K02108', 'K02115', 'K02110', 'K02113', 'K02109', 'K02112', 'K02111', 'K02114'} | M00157 |
| GCA_947302355.1 SRR10912539 bin.48 metaWRAP v1.3 MAG_genomic | {'K15633', 'K00927', 'K01689', 'K01803', 'K00134', 'K00873'}                     | M00002 |
| GCA_947302355.1 SRR10912539 bin.48 metaWRAP v1.3 MAG_genomic | {'K01897'}                                                                       | M00086 |
| GCA_947302355.1 SRR10912539 bin.48 metaWRAP v1.3 MAG_genomic | {'K00625', 'K00925'}                                                             | M00579 |
| GCA_943354005.1 MsH-30jul19-11_genomic                       | {'K00927', 'K01803', 'K00134', 'K00873'}                                         | M00002 |
| GCA_943354005.1 MsH-30jul19-11_genomic                       | {'K02108', 'K02115', 'K02110', 'K02113', 'K02109', 'K02112', 'K02111', 'K02114'} | M00157 |
| GCA_015257575.1 ASM1525757v1_genomic                         | {'K00927', 'K01689', 'K01803', 'K00134', 'K00873'}                               | M00002 |
| GCA_015257575.1 ASM1525757v1_genomic                         | {'K02108', 'K02115', 'K02110', 'K02113', 'K02109', 'K02112', 'K02111', 'K02114'} | M00157 |
| R0170300323 tooth RAH.megahit.bin.16                         | {'K15633', 'K00927', 'K01689', 'K01803', 'K00134', 'K00873'}                     | M00002 |
| R0170300323 tooth RAH.megahit.bin.16                         | {'K02108', 'K02115', 'K02110', 'K02113', 'K02109', 'K02112', 'K02111', 'K02114'} | M00157 |
| GCA_002404255.1 ASM240425v1_genomic                          | {'K01834', 'K00927', 'K01689', 'K01803', 'K00134', 'K00873'}                     | M00002 |
| GCA_002404255.1 ASM240425v1_genomic                          | {'K02108', 'K02115', 'K02110', 'K02113', 'K02109', 'K02112', 'K02111', 'K02114'} | M00157 |
| GCA_002404255.1 ASM240425v1_genomic                          | {'K02298', 'K02300', 'K02297', 'K02299'}                                         | M00417 |
| GCA_947253235.1 SRR17635697 bin.12 metaWRAP v1.3 MAG_genomic | {'K01834', 'K00927', 'K01689', 'K01803', 'K00134', 'K00873'}                     | M00002 |
| GCA_947253235.1 SRR17635697 bin.12 metaWRAP v1.3 MAG_genomic | {'K01897'}                                                                       | M00086 |
| R0170300270 tooth RAH.megahit.bin.51                         | {'K15633', 'K00927', 'K01689', 'K01803', 'K00134', 'K00873'}                     | M00002 |
| R0170300270 tooth RAH.megahit.bin.51                         | {'K02108', 'K02115', 'K02110', 'K02113', 'K02109', 'K02112', 'K02111', 'K02114'} | M00157 |
| GCA_017460165.1                                              | {'K15633', 'K00927', 'K01689', 'K01803', 'K00134', 'K00873'}                     | M00002 |
| GCA_027427555.1 ASM2742755v1_genomic                         | {'K00927', 'K01803', 'K00134', 'K00873'}                                         | M00002 |
| GCA_027427555.1 ASM2742755v1_genomic                         | {'K02108', 'K02115', 'K02110', 'K02113', 'K02109', 'K02112', 'K02111', 'K02114'} | M00157 |
| YS000721 saliva.spades.bin.7                                 | {'K01834', 'K00927', 'K01689', 'K01803', 'K00134', 'K00873'}                     | M00002 |
| SZAXPI018102-23 RA_dental.metaspades.bin.20                  | {'K01834', 'K01689', 'K00873'}                                                   | M00002 |
| SZAXPI018102-23 RA_dental.metaspades.bin.20                  | {'K02108', 'K02115', 'K02110', 'K02113', 'K02109', 'K02112', 'K02111', 'K02114'} | M00157 |
| R0170300051 tooth RA.megahit.bin.56                          | {'K01834', 'K00927', 'K01689', 'K01803', 'K00134', 'K00873'}                     | M00002 |
| RSZAXPI002455-75 RAH_dental.metaspades.bin.33                | {'K00927', 'K01689', 'K01803', 'K00134', 'K00873'}                               | M00002 |
| RSZAXPI002455-75 RAH_dental.metaspades.bin.33                | {'K02108', 'K02115', 'K02110', 'K02113', 'K02109', 'K02112', 'K02111', 'K02114'} | M00157 |
| R0170300355 saliva RA.megahit.bin.8                          | {'K01834', 'K00927', 'K01689', 'K01803', 'K00134', 'K00873'}                     | M00002 |
| RDPYD18097649 A_saliva.metaspades.bin.16                     | {'K15633', 'K00927', 'K01689', 'K01803', 'K00134', 'K00873'}                     | M00002 |
| RDPYD18097649 A_saliva.metaspades.bin.16                     | {'K00625', 'K00925'}                                                             | M00579 |
| R0170300284 tooth RAH.megahit.bin.22                         | {'K01834', 'K01689', 'K01803', 'K00134', 'K00873'}                               | M00002 |
| R0170300284 tooth RAH.megahit.bin.22                         | {'K02108', 'K02115', 'K02110', 'K02113', 'K02109', 'K02112', 'K02111', 'K02114'} | M00157 |
| RSZYD18187520 A_saliva.metaspades.bin.22                     | {'K01834', 'K00927', 'K01689', 'K01803', 'K00134', 'K00873'}                     | M00002 |
| RSZYD18187520 A_saliva.metaspades.bin.22                     | {'K02108', 'K02115', 'K02110', 'K02113', 'K02109', 'K02112', 'K02111', 'K02114'} | M00157 |
| R0170300203 tooth RA.megahit.bin.96                          | {'K00927', 'K01689', 'K01803', 'K00134', 'K00873'}                               | M00002 |
| R0170300203 tooth RA.megahit.bin.96                          | {'K02108', 'K02115', 'K02110', 'K02113', 'K02109', 'K02112', 'K02111', 'K02114'} | M00157 |
| SZAXPI018280-95 RA_dental.metaspades.bin.20                  | {'K01834', 'K01689', 'K00873'}                                                   | M00002 |
| SZAXPI018280-95 RA_dental.metaspades.bin.20                  | {'K02108', 'K02115', 'K02110', 'K02113', 'K02109', 'K02112', 'K02111', 'K02114'} | M00157 |
| SZAXPI018317-19 RA_dental.metaspades.bin.4                   | {'K00927', 'K01689', 'K01803', 'K00134', 'K00873'}                               | M00002 |
| SZAXPI018317-19 RA_dental.metaspades.bin.4                   | {'K02108', 'K02115', 'K02110', 'K02113', 'K02109', 'K02112', 'K02111', 'K02114'} | M00157 |
| GCA_016699065.1 ASM1669906v1_genomic                         | {'K00927', 'K01803', 'K00134', 'K00873'}                                         | M00002 |
| GCA_016699065.1 ASM1669906v1_genomic                         | {'K02108', 'K02115', 'K02110', 'K02113', 'K02109', 'K02112', 'K02111', 'K02114'} | M00157 |
| RDPYD18098966 A_saliva.metaspades.bin.10                     | {'K01834', 'K00927', 'K01689', 'K01803', 'K00134', 'K00873'}                     | M00002 |
| GCA_017432225.1                                              | {'K15633', 'K00927', 'K01689', 'K01803', 'K00134', 'K00873'}                     | M00002 |
| GCA_017432225.1                                              | {'K01897'}                                                                       | M00086 |
| GCA_017432225.1                                              | {'K00625', 'K00925'}                                                             | M00579 |
| RDPYD18201791 A_saliva.metaspades.bin.40                     | {'K01834', 'K00927', 'K01803', 'K00134', 'K00873'}                               | M00002 |
| RDPYD18201791 A_saliva.metaspades.bin.40                     | {'K02108', 'K02115', 'K02110', 'K02113', 'K02109', 'K02112', 'K02111', 'K02114'} | M00157 |
| RSZAXPI002656-16 RA_dental.metaspades.bin.48                 | {'K01834', 'K00927', 'K01689', 'K01803', 'K00134', 'K00873'}                     | M00002 |
| RSZYD18187500 A_saliva.metaspades.bin.18                     | {'K01834', 'K00927', 'K01689', 'K01803', 'K00134', 'K00873'}                     | M00002 |
| RSZYD18187500 A_saliva.metaspades.bin.18                     | {'K02108', 'K02115', 'K02110', 'K02113', 'K02109', 'K02112', 'K02111', 'K02114'} | M00157 |
| GCA_947253955.1 SRR17635595 bin.5 metaWRAP v1.3 MAG_genomic  | {'K01834', 'K00927', 'K01689', 'K01803', 'K00134', 'K00873'}                     | M00002 |
| GCA_947253955.1 SRR17635595 bin.5 metaWRAP v1.3 MAG_genomic  | {'K01897'}                                                                       | M00086 |
| R0170300194 tooth RA.megahit.bin.111                         | {'K01834', 'K01689', 'K01803', 'K00134', 'K00873'}                               | M00002 |
| R0170300194 tooth RA.megahit.bin.111                         | {'K02108', 'K02115', 'K02110', 'K02113', 'K02109', 'K02112', 'K02111', 'K02114'} | M00157 |
| R0170300255 tooth RAH.megahit.bin.83                         | {'K00927', 'K01689', 'K01803', 'K00134', 'K00873'}                               | M00002 |
| R0170300255 tooth RAH.megahit.bin.83                         | {'K02108', 'K02115', 'K02110', 'K02113', 'K02109', 'K02112', 'K02111', 'K02114'} | M00157 |
| YS000299 saliva.spades.bin.16                                | {'K01834', 'K00927', 'K01689', 'K01803', 'K00873'}                               | M00002 |
| YS000299 saliva.spades.bin.16                                | {'K02108', 'K02109', 'K02112', 'K02110', 'K02113', 'K02114'}                     | M00157 |
| R0170300229 tooth RA.megahit.bin.48                          | {'K01834', 'K00927', 'K01689', 'K01803', 'K00134', 'K00873'}                     | M00002 |
| R0170300229 tooth RA.megahit.bin.48                          | {'K02108', 'K02115', 'K02110', 'K02113', 'K02109', 'K02112', 'K02111', 'K02114'} | M00157 |
| RSZYD18187650 A_saliva.metaspades.bin.9                      | {'K01834', 'K00927', 'K01689', 'K01803', 'K00134', 'K00873'}                     | M00002 |
| RSZYD18187650 A_saliva.metaspades.bin.9                      | {'K02108', 'K02115', 'K02110', 'K02113', 'K02109', 'K02112', 'K02111', 'K02114'} | M00157 |
| R0170300321 tooth RAH.megahit.bin.95                         | {'K01834', 'K00927', 'K01689', 'K01803', 'K00134', 'K00873'}                     | M00002 |
| RSZYD18078075 A_saliva.metaspades.bin.101                    | {'K01834', 'K00927', 'K01689', 'K01803', 'K00134', 'K00873'}                     | M00002 |
| RDPYD18098935 A_saliva.metaspades.bin.23                     | {'K01834', 'K00927', 'K01689', 'K01803', 'K00134', 'K00873'}                     | M00002 |
| GCA_021404905.1 ASM2140490v1_genomic                         | {'K00927', 'K01689', 'K01803', 'K00134', 'K00873'}                               | M00002 |

|                                                           |                                                                           |        |
|-----------------------------------------------------------|---------------------------------------------------------------------------|--------|
| GCA_021404905.1_ASM2140490v1_genomic                      | {'K02108','K02115','K02110','K02113','K02109','K02112','K02111','K02114'} | M00157 |
| RSZYD18187715_A_saliva.metaspades.bin.33                  | {'K01834','K00927','K01689','K01803','K00134','K00873'}                   | M00002 |
| RSZYD18187715_A_saliva.metaspades.bin.33                  | {'K02108','K02115','K02110','K02113','K02109','K02112','K02111','K02114'} | M00157 |
| RSZAXPI002477-142_2_RAH_saliva.metaspades.bin.82          | {'K01834','K00927','K01689','K01803','K00134','K00873'}                   | M00002 |
| RSZAXPI002477-142_2_RAH_saliva.metaspades.bin.82          | {'K02108','K02115','K02110','K02113','K02109','K02112','K02111','K02114'} | M00157 |
| GCA_903828465.1_freshwater_MAG_---_Umea3_bin-2596_genomic | {'K00927','K01803','K00134','K00873'}                                     | M00002 |
| GCA_903828465.1_freshwater_MAG_---_Umea3_bin-2596_genomic | {'K02108','K02109','K02112','K02111','K02115','K02110','K02113'}          | M00157 |
| YS000456_saliva.spades.bin.18                             | {'K01834','K00927','K01689','K01803','K00134','K00873'}                   | M00002 |
| YS000456_saliva.spades.bin.18                             | {'K02108','K02115','K02110','K02113','K02109','K02112','K02111','K02114'} | M00157 |
| R0170300298_tooth_RAH.megahit.bin.124                     | {'K15633','K00927','K01689','K01803','K00134','K00873'}                   | M00002 |
| R0170300298_tooth_RAH.megahit.bin.124                     | {'K00625','K00925'}                                                       | M00579 |
| R0170300154_tooth_RA.megahit.bin.116                      | {'K01834','K15633','K00927','K01803','K00134','K00873'}                   | M00002 |
| R0170300154_tooth_RA.megahit.bin.116                      | {'K02108','K02115','K02110','K02113','K02109','K02112','K02111','K02114'} | M00157 |
| R0170300179_tooth_RA.megahit.bin.1                        | {'K00927','K01689','K01803','K00134','K00873'}                            | M00002 |
| GCA_027427115.1_ASM2742711v1_genomic                      | {'K02112','K02111','K02115','K02114'}                                     | M00157 |
| GCA_027427115.1_ASM2742711v1_genomic                      | {'K02298','K02300','K02297','K02299'}                                     | M00417 |
| RDPYD18088981_A_saliva.metaspades.bin.1                   | {'K15633','K00927','K01689','K01803','K00134'}                            | M00002 |
| RDPYD18088981_A_saliva.metaspades.bin.1                   | {'K00625','K00925'}                                                       | M00579 |
| SZAXPI018287-129_RA_dental.metaspades.bin.14              | {'K15633','K00927','K01689','K01803','K00134','K00873'}                   | M00002 |
| SZAXPI018287-129_RA_dental.metaspades.bin.14              | {'K02108','K02115','K02110','K02113','K02109','K02112','K02111','K02114'} | M00157 |
| R0170300235_tooth_RAH.megahit.bin.27                      | {'K15633','K00927','K01689','K01803','K00134','K00873'}                   | M00002 |
| R0170300235_tooth_RAH.megahit.bin.27                      | {'K00625','K00925'}                                                       | M00579 |
| R0170300148_tooth_RA.megahit.bin.83                       | {'K15633','K00927','K01689','K01803','K00134','K00873'}                   | M00002 |
| R0170300148_tooth_RA.megahit.bin.83                       | {'K02108','K02115','K02110','K02113','K02109','K02112','K02111','K02114'} | M00157 |
| RSZYD18078705_A_saliva.metaspades.bin.21                  | {'K01834','K00927','K01689','K01803','K00134','K00873'}                   | M00002 |
| R0170300223_tooth_RA.megahit.bin.44                       | {'K15633','K00927','K01689','K01803','K00134','K00873'}                   | M00002 |
| R0170300223_tooth_RA.megahit.bin.44                       | {'K02108','K02115','K02110','K02113','K02109','K02112','K02111','K02114'} | M00157 |
| GCA_020428425.1_ASM2042842v1_genomic                      | {'K02108','K02109','K02111','K02115','K02113'}                            | M00157 |
| SZAXPI018101-22_RA_dental.metaspades.bin.22               | {'K00927','K01689','K01803','K00134','K00873'}                            | M00002 |
| SZAXPI018101-22_RA_dental.metaspades.bin.22               | {'K02108','K02115','K02110','K02113','K02109','K02112','K02111','K02114'} | M00157 |
| RSZAXPI002627-75_RA_dental.metaspades.bin.12              | {'K00927','K01689','K01803','K00134','K00873'}                            | M00002 |
| RSZAXPI002627-75_RA_dental.metaspades.bin.12              | {'K02108','K02115','K02110','K02113','K02109','K02112','K02111','K02114'} | M00157 |
| R0170300287_tooth_RAH.megahit.bin.151                     | {'K01834','K00927','K01689','K01803','K00134','K00873'}                   | M00002 |
| RSZAXPI002330-47_RAH_dental.metaspades.bin.26             | {'K01834','K01689','K01803','K00134','K00873'}                            | M00002 |
| RSZAXPI002330-47_RAH_dental.metaspades.bin.26             | {'K02108','K02115','K02110','K02113','K02109','K02112','K02111','K02114'} | M00157 |
| SZAXPI018283-109_RA_dental.metaspades.bin.24              | {'K01834','K00927','K15633','K01689','K01803','K00134','K00873'}          | M00002 |
| SZAXPI018283-109_RA_dental.metaspades.bin.24              | {'K02108','K02109','K02112','K02111','K02115','K02110','K02114'}          | M00157 |
| R0170300159_tooth_RA.megahit.bin.123                      | {'K00927','K01689','K01803','K00134','K00873'}                            | M00002 |
| R0170300159_tooth_RA.megahit.bin.123                      | {'K02108','K02115','K02110','K02113','K02109','K02112','K02111','K02114'} | M00157 |
| RSZYD18078703_A_saliva.metaspades.bin.8                   | {'K01834','K00927','K01689','K01803','K00134','K00873'}                   | M00002 |
| RSZYD18078703_A_saliva.metaspades.bin.8                   | {'K02108','K02115','K02110','K02113','K02109','K02112','K02111','K02114'} | M00157 |
| RSZAXPI002633-90_RA_dental.metaspades.bin.49              | {'K01834','K01689','K01803','K00134','K00873'}                            | M00002 |
| RSZAXPI002633-90_RA_dental.metaspades.bin.49              | {'K02108','K02115','K02110','K02113','K02109','K02112','K02111','K02114'} | M00157 |
| RSZAXPI002454-50_RAH_dental.metaspades.bin.3              | {'K00927','K01689','K01803','K00134','K00873'}                            | M00002 |
| RSZAXPI002454-50_RAH_dental.metaspades.bin.3              | {'K02108','K02115','K02110','K02113','K02109','K02112','K02111','K02114'} | M00157 |
| RSZYD18078769_A_saliva.metaspades.bin.23                  | {'K01834','K00927','K01689','K01803','K00134','K00873'}                   | M00002 |
| RSZYD18078769_A_saliva.metaspades.bin.23                  | {'K02108','K02115','K02110','K02113','K02109','K02112','K02111','K02114'} | M00157 |
| RSZYD18187234_A_saliva.metaspades.bin.73                  | {'K01834','K00927','K01689','K01803','K00134','K00873'}                   | M00002 |
| RSZYD18187234_A_saliva.metaspades.bin.73                  | {'K02108','K02115','K02110','K02113','K02109','K02112','K02111','K02114'} | M00157 |
| GCA_024330325.1_ASM2433032v1_genomic                      | {'K01834','K00927','K01689','K01803','K00134','K00873'}                   | M00002 |
| GCA_024330325.1_ASM2433032v1_genomic                      | {'K02109','K02112','K02111','K02115','K02110','K02113','K02114'}          | M00157 |
| RDPYD18098591_A_saliva.metaspades.bin.49                  | {'K01834','K00927','K01689','K01803','K00873'}                            | M00002 |
| YS000231_saliva.spades.bin.18                             | {'K01834','K00927','K01689','K01803','K00134','K00873'}                   | M00002 |
| YS000231_saliva.spades.bin.18                             | {'K02108','K02115','K02110','K02113','K02109','K02112','K02111','K02114'} | M00157 |
| RSZYD18187142_A_saliva.metaspades.bin.22                  | {'K01834','K00927','K01689','K01803','K00873'}                            | M00002 |
| RSZYD18187142_A_saliva.metaspades.bin.22                  | {'K02108','K02109','K02110','K02113'}                                     | M00157 |
| GCA_002455275.1_ASM245527v1_genomic                       | {'K00927','K15633','K01689','K01803','K00134','K00873'}                   | M00002 |
| GCA_002455275.1_ASM245527v1_genomic                       | {'K02108','K02115','K02110','K02113','K02109','K02112','K02111','K02114'} | M00157 |
| GCA_002455275.1_ASM245527v1_genomic                       | {'K02298','K02300','K02297','K02299'}                                     | M00417 |
| RSZAXPI002614-22_RA_dental.metaspades.bin.18              | {'K01834','K00927','K01689','K01803','K00134','K00873'}                   | M00002 |
| R0170300277_tooth_RAH.megahit.bin.80                      | {'K01834','K00927','K01689','K01803','K00134','K00873'}                   | M00002 |
| R0170300148_tooth_RA.megahit.bin.4                        | {'K00927','K01689','K01803','K00134','K00873'}                            | M00002 |
| R0170300148_tooth_RA.megahit.bin.4                        | {'K02108','K02115','K02110','K02113','K02109','K02112','K02111','K02114'} | M00157 |
| RSZYD18078444_A_saliva.metaspades.bin.56                  | {'K01834','K00927','K01689','K01803','K00134','K00873'}                   | M00002 |
| RSZYD18078444_A_saliva.metaspades.bin.56                  | {'K02108','K02115','K02110','K02113','K02109','K02112','K02111','K02114'} | M00157 |
| YS000455_saliva.spades.bin.37                             | {'K01834','K00927','K01689','K01803','K00134','K00873'}                   | M00002 |
| YS000455_saliva.spades.bin.37                             | {'K02108','K02109','K02110','K02113'}                                     | M00157 |
| SZAXPI018315-17_RA_dental.metaspades.bin.58               | {'K00927','K01689','K01803','K00134','K00873'}                            | M00002 |
| SZAXPI018315-17_RA_dental.metaspades.bin.58               | {'K02108','K02115','K02110','K02113','K02109','K02112','K02111','K02114'} | M00157 |
| YS000444_saliva.spades.bin.11                             | {'K01834','K00927','K01689','K01803','K00134','K00873'}                   | M00002 |
| R0170300279_tooth_RAH.megahit.bin.27                      | {'K00927','K01689','K01803','K00134','K00873'}                            | M00002 |
| R0170300279_tooth_RAH.megahit.bin.27                      | {'K02108','K02115','K02110','K02113','K02109','K02112','K02111','K02114'} | M00157 |
| SZAXPI018355-20_RA_saliva.metaspades.bin.45               | {'K01834','K00927','K01689','K01803','K00134','K00873'}                   | M00002 |
| R0170300202_tooth_RA.megahit.bin.78                       | {'K01834','K01689','K01803','K00134','K00873'}                            | M00002 |
| R0170300202_tooth_RA.megahit.bin.78                       | {'K02108','K02115','K02110','K02113','K02109','K02112','K02111','K02114'} | M00157 |
| R0170300104_tooth_RA.megahit.bin.12                       | {'K01834','K00927','K01689','K01803','K00134','K00873'}                   | M00002 |
| RSZAXPI002625-57_RA_dental.metaspades.bin.44              | {'K01834','K00927','K01689','K01803','K00134','K00873'}                   | M00002 |
| RSZAXPI002625-57_RA_dental.metaspades.bin.44              | {'K02108','K02115','K02110','K02113','K02109','K02112','K02111','K02114'} | M00157 |
| GCA_003962975.1_ASM396297v1_genomic                       | {'K01834','K00927','K15633','K01803','K00134','K00873'}                   | M00002 |
| GCA_003962975.1_ASM396297v1_genomic                       | {'K02108','K02112','K02111','K02115','K02113','K02114'}                   | M00157 |
| RDPYD18300006_A_saliva.metaspades.bin.7                   | {'K01834','K00927','K01689','K01803','K00134','K00873'}                   | M00002 |
| RDPYD18300006_A_saliva.metaspades.bin.7                   | {'K02108','K02115','K02110','K02113','K02109','K02112','K02111','K02114'} | M00157 |
| YS000740_saliva.spades.bin.23                             | {'K01834','K00927','K01803','K00134','K00873'}                            | M00002 |
| YS000740_saliva.spades.bin.23                             | {'K02108','K02115','K02110','K02113','K02109','K02112','K02111','K02114'} | M00157 |
| RSZYD18078088_A_saliva.metaspades.bin.16                  | {'K01834','K00927','K01689','K01803','K00134','K00873'}                   | M00002 |
| R0170300136_tooth_RA.megahit.bin.73                       | {'K15633','K00927','K01689','K01803','K00134','K00873'}                   | M00002 |
| R0170300136_tooth_RA.megahit.bin.73                       | {'K00625','K00925'}                                                       | M00579 |
| GCA_013334475.1_ASM1333447v1_genomic                      | {'K15633','K01689','K01803','K00873'}                                     | M00002 |
| GCA_013334475.1_ASM1333447v1_genomic                      | {'K02108','K02115','K02110','K02113','K02109','K02112','K02111','K02114'} | M00157 |
| SZAXPI018392-31_RA_saliva.metaspades.bin.11               | {'K01834','K00927','K01689','K01803','K00134','K00873'}                   | M00002 |
| SZAXPI018392-31_RA_saliva.metaspades.bin.11               | {'K02108','K02115','K02110','K02113','K02109','K02112','K02111','K02114'} | M00157 |
| RSZYD18078798_A_saliva.metaspades.bin.24                  | {'K15633','K00927','K01689','K01803','K00134','K00873'}                   | M00002 |
| RSZYD18078798_A_saliva.metaspades.bin.24                  | {'K00625','K00925'}                                                       | M00579 |
| GCA_020428005.1_ASM2042800v1_genomic                      | {'K00927','K01803','K00134','K00873'}                                     | M00002 |
| GCA_020428005.1_ASM2042800v1_genomic                      | {'K02108','K02109','K02112','K02111','K02115','K02110','K02114'}          | M00157 |
| GCA_020428005.1_ASM2042800v1_genomic                      | {'K02298','K02300','K02297','K02299'}                                     | M00417 |
| RDPYD18300175_A_saliva.metaspades.bin.54                  | {'K15633','K00927','K01689','K01803','K00134','K00873'}                   | M00002 |
| RDPYD18300175_A_saliva.metaspades.bin.54                  | {'K00625','K00925'}                                                       | M00579 |
| GCA_027426775.1_ASM2742677v1_genomic                      | {'K00927','K01803','K00134','K00873'}                                     | M00002 |
| GCA_027426775.1_ASM2742677v1_genomic                      | {'K02108','K02115','K02110','K02113','K02109','K02112','K02111','K02114'} | M00157 |
| GCA_027426775.1_ASM2742677v1_genomic                      | {'K02298','K02300','K02297','K02299'}                                     | M00417 |
| YS000226_saliva.spades.bin.6                              | {'K01834','K00927','K01689','K01803','K00134','K00873'}                   | M00002 |
| YS000226_saliva.spades.bin.6                              | {'K02108','K02112','K02111','K02115','K02110','K02114'}                   | M00157 |
| R0170300298_tooth_RAH.megahit.bin.133                     | {'K01834','K01689','K01803','K00134','K00873'}                            | M00002 |
| R0170300298_tooth_RAH.megahit.bin.133                     | {'K02108','K02115','K02110','K02113','K02109','K02112','K02111','K02114'} | M00157 |



|                                                              |                                                                                  |        |
|--------------------------------------------------------------|----------------------------------------------------------------------------------|--------|
| RSZAXPI002620-35 RA_dental.metaspades.bin.60                 | {'K01834', 'K00927', 'K01689', 'K01803', 'K00134', 'K00873'}                     | M00002 |
| GCA_947303265.1_SRR10912539_bin.36_metaWRAP_v1.3_MAG_genomic | {'K15633', 'K00927', 'K01689', 'K01803', 'K00134', 'K00873'}                     | M00002 |
| GCA_947303265.1_SRR10912539_bin.36_metaWRAP_v1.3_MAG_genomic | {'K01897'}                                                                       | M00086 |
| GCA_947303265.1_SRR10912539_bin.36_metaWRAP_v1.3_MAG_genomic | {'K00625', 'K00925'}                                                             | M00579 |
| GCA_022828285.1_ASM2282828v1_genomic                         | {'K01834', 'K00927', 'K01689', 'K01803', 'K00134', 'K00873'}                     | M00002 |
| GCA_022828285.1_ASM2282828v1_genomic                         | {'K02108', 'K02115', 'K02110', 'K02113', 'K02109', 'K02112', 'K02111', 'K02114'} | M00157 |
| SZAXPI018178-34_RA_dental.metaspades.bin.15                  | {'K15633', 'K00927', 'K01689', 'K01803', 'K00134', 'K00873'}                     | M00002 |
| SZAXPI018178-34_RA_dental.metaspades.bin.15                  | {'K00625', 'K00925'}                                                             | M00579 |
| GCA_018058565.1_ASM1805856v1_genomic                         | {'K01834', 'K00927', 'K01689', 'K01803', 'K00134', 'K00873'}                     | M00002 |
| R0170300292_tooth_RAH.megahit.bin.19                         | {'K15633', 'K00927', 'K01689', 'K01803', 'K00134', 'K00873'}                     | M00002 |
| R0170300055_tooth_RA.megahit.bin.26                          | {'K15633', 'K00927', 'K01689', 'K01803', 'K00134', 'K00873'}                     | M00002 |
| R0170300055_tooth_RA.megahit.bin.26                          | {'K02108', 'K02115', 'K02110', 'K02113', 'K02109', 'K02112', 'K02111', 'K02114'} | M00157 |
| YS000331_saliva.spades.bin.6                                 | {'K01834', 'K00927', 'K01803', 'K00134', 'K00873'}                               | M00002 |
| YS000331_saliva.spades.bin.6                                 | {'K02112', 'K02111', 'K02115', 'K02114'}                                         | M00157 |
| YS000371_saliva.spades.bin.7                                 | {'K01834', 'K00927', 'K01689', 'K01803', 'K00134', 'K00873'}                     | M00002 |
| YS000371_saliva.spades.bin.7                                 | {'K02108', 'K02115', 'K02110', 'K02113', 'K02109', 'K02112', 'K02111', 'K02114'} | M00157 |
| SZAXPI018310-169_RA_dental.metaspades.bin.1                  | {'K00927', 'K01689', 'K01803', 'K00134', 'K00873'}                               | M00002 |
| RSZYD18078087_A_saliva.metaspades.bin.33                     | {'K01834', 'K00927', 'K01689', 'K01803', 'K00134', 'K00873'}                     | M00002 |
| RSZYD18078087_A_saliva.metaspades.bin.33                     | {'K02108', 'K02115', 'K02110', 'K02113', 'K02109', 'K02112', 'K02111', 'K02114'} | M00157 |
| GCA_017431465.1                                              | {'K15633', 'K00927', 'K01689', 'K01803', 'K00134', 'K00873'}                     | M00002 |
| R0170300249_tooth_RAH.megahit.bin.3                          | {'K00927', 'K01689', 'K01803', 'K00134', 'K00873'}                               | M00002 |
| R0170300249_tooth_RAH.megahit.bin.3                          | {'K02108', 'K02115', 'K02110', 'K02113', 'K02109', 'K02112', 'K02111', 'K02114'} | M00157 |
| SZAXPI018189-47_RA_dental.metaspades.bin.40                  | {'K01834', 'K01689', 'K01803', 'K00134', 'K00873'}                               | M00002 |
| SZAXPI018189-47_RA_dental.metaspades.bin.40                  | {'K02108', 'K02115', 'K02110', 'K02113', 'K02109', 'K02112', 'K02111', 'K02114'} | M00157 |
| RDPYD18098770_A_saliva.metaspades.bin.53                     | {'K01834', 'K00927', 'K01689', 'K01803', 'K00134', 'K00873'}                     | M00002 |
| RDPYD18098770_A_saliva.metaspades.bin.53                     | {'K02108', 'K02115', 'K02110', 'K02113', 'K02109', 'K02112', 'K02111', 'K02114'} | M00157 |
| GCA_017514665.1_ASM1751466v1_genomic                         | {'K15633', 'K00927', 'K01689', 'K01803', 'K00134', 'K00873'}                     | M00002 |
| GCA_017514665.1_ASM1751466v1_genomic                         | {'K01897'}                                                                       | M00086 |
| GCA_017514665.1_ASM1751466v1_genomic                         | {'K00625', 'K00925'}                                                             | M00579 |
| RSZAXPI002482-15_2_RAH_saliva.metaspades.bin.8               | {'K01834', 'K00927', 'K01689', 'K01803', 'K00134', 'K00873'}                     | M00002 |
| RSZAXPI002482-15_2_RAH_saliva.metaspades.bin.8               | {'K02108', 'K02115', 'K02110', 'K02113', 'K02109', 'K02112', 'K02111', 'K02114'} | M00157 |
| R0170300283_tooth_RAH.megahit.bin.67                         | {'K01834', 'K01689', 'K01803', 'K00134', 'K00873'}                               | M00002 |
| R0170300283_tooth_RAH.megahit.bin.67                         | {'K02108', 'K02115', 'K02110', 'K02113', 'K02109', 'K02112', 'K02111', 'K02114'} | M00157 |
| R0170300249_tooth_RAH.megahit.bin.103                        | {'K15633', 'K00927', 'K01689', 'K01803', 'K00134', 'K00873'}                     | M00002 |
| R0170300249_tooth_RAH.megahit.bin.103                        | {'K00625', 'K00925'}                                                             | M00579 |
| SZAXPI018279-94_RA_dental.metaspades.bin.46                  | {'K00927', 'K01689', 'K01803', 'K00134', 'K00873'}                               | M00002 |
| SZAXPI018279-94_RA_dental.metaspades.bin.46                  | {'K02108', 'K02115', 'K02110', 'K02113', 'K02109', 'K02112', 'K02111', 'K02114'} | M00157 |
| RSZAXPI002459-90_RAH_dental.metaspades.bin.59                | {'K00927', 'K01689', 'K01803', 'K00134', 'K00873'}                               | M00002 |
| RSZAXPI002459-90_RAH_dental.metaspades.bin.59                | {'K02108', 'K02115', 'K02110', 'K02113', 'K02109', 'K02112', 'K02111', 'K02114'} | M00157 |
| R0170300107_tooth_RA.megahit.bin.2                           | {'K01834', 'K00927', 'K01689', 'K01803', 'K00134'}                               | M00002 |
| R0170300107_tooth_RA.megahit.bin.2                           | {'K02108', 'K02115', 'K02110', 'K02113', 'K02109', 'K02112', 'K02111', 'K02114'} | M00157 |
| R0170300271_tooth_RAH.megahit.bin.21                         | {'K00927', 'K01689', 'K01803', 'K00134', 'K00873'}                               | M00002 |
| R0170300271_tooth_RAH.megahit.bin.21                         | {'K02108', 'K02115', 'K02110', 'K02113', 'K02109', 'K02112', 'K02111', 'K02114'} | M00157 |
| GCA_002343385.1_ASM234338v1_genomic                          | {'K00927', 'K01803', 'K00134', 'K00873'}                                         | M00002 |
| GCA_002343385.1_ASM234338v1_genomic                          | {'K02108', 'K02109', 'K02112', 'K02111', 'K02115', 'K02110', 'K02114'}           | M00157 |
| GCA_002343385.1_ASM234338v1_genomic                          | {'K02298', 'K02300', 'K02297', 'K02299'}                                         | M00417 |
| R0170300257_tooth_RAH.megahit.bin.65                         | {'K01834', 'K01689', 'K01803', 'K00134', 'K00873'}                               | M00002 |
| R0170300257_tooth_RAH.megahit.bin.65                         | {'K02108', 'K02115', 'K02110', 'K02113', 'K02109', 'K02112', 'K02111', 'K02114'} | M00157 |
| R0170300295_tooth_RAH.megahit.bin.55                         | {'K01834', 'K01689', 'K00873'}                                                   | M00002 |
| R0170300295_tooth_RAH.megahit.bin.55                         | {'K02108', 'K02115', 'K02110', 'K02113', 'K02109', 'K02112', 'K02111', 'K02114'} | M00157 |
| GCA_900555425.1_UMGS1831_genomic                             | {'K02108', 'K02115', 'K02110', 'K02113', 'K02109', 'K02112', 'K02111', 'K02114'} | M00157 |
| RDPYD18189913_A_saliva.metaspades.bin.17                     | {'K01834', 'K00927', 'K01689', 'K01803', 'K00134', 'K00873'}                     | M00002 |
| RDPYD18189913_A_saliva.metaspades.bin.17                     | {'K02108', 'K02115', 'K02110', 'K02113', 'K02109', 'K02112', 'K02111', 'K02114'} | M00157 |
| RSZYD18078217_A_saliva.metaspades.bin.95                     | {'K15633', 'K00927', 'K01689', 'K01803', 'K00134', 'K00873'}                     | M00002 |
| RSZYD18078217_A_saliva.metaspades.bin.95                     | {'K00625', 'K00925'}                                                             | M00579 |
| R0170300119_tooth_RA.megahit.bin.84                          | {'K01834', 'K00927', 'K01689', 'K01803', 'K00134', 'K00873'}                     | M00002 |
| R0170300119_tooth_RA.megahit.bin.84                          | {'K02108', 'K02115', 'K02110', 'K02113', 'K02109', 'K02112', 'K02111', 'K02114'} | M00157 |
| RSZYD18078593_A_saliva.metaspades.bin.35                     | {'K01834', 'K00927', 'K01689', 'K01803', 'K00134', 'K00873'}                     | M00002 |
| RSZYD18078593_A_saliva.metaspades.bin.35                     | {'K02108', 'K02109', 'K02112', 'K02111', 'K02115', 'K02113', 'K02114'}           | M00157 |
| SZAXPI018286-123_RA_dental.metaspades.bin.62                 | {'K01834', 'K01689', 'K01803', 'K00134', 'K00873'}                               | M00002 |
| SZAXPI018286-123_RA_dental.metaspades.bin.62                 | {'K02108', 'K02115', 'K02110', 'K02113', 'K02109', 'K02112', 'K02111', 'K02114'} | M00157 |
| GCA_946414345.1_SRR12081302_bin.4_metaWRAP_v1.3_MAG_genomic  | {'K15633', 'K00927', 'K01689', 'K01803', 'K00134', 'K00873'}                     | M00002 |
| GCA_946414345.1_SRR12081302_bin.4_metaWRAP_v1.3_MAG_genomic  | {'K01897'}                                                                       | M00086 |
| GCA_946414345.1_SRR12081302_bin.4_metaWRAP_v1.3_MAG_genomic  | {'K00625', 'K00925'}                                                             | M00579 |
| RSZAXPI002313-22_RAH_dental.metaspades.bin.87                | {'K15633', 'K00927', 'K01689', 'K01803', 'K00134', 'K00873'}                     | M00002 |
| RSZAXPI002313-22_RAH_dental.metaspades.bin.87                | {'K00625', 'K00925'}                                                             | M00579 |
| GCA_947097585.1_SRR8786264_bin.12_metaWRAP_v1.3_MAG_genomic  | {'K01834', 'K01689', 'K01803', 'K00134', 'K00873'}                               | M00002 |
| GCA_947097585.1_SRR8786264_bin.12_metaWRAP_v1.3_MAG_genomic  | {'K02108', 'K02115', 'K02110', 'K02113', 'K02109', 'K02112', 'K02111', 'K02114'} | M00157 |
| GCA_009992235.1_ASM999223v1_genomic                          | {'K02108', 'K02115', 'K02110', 'K02113', 'K02109', 'K02112', 'K02111', 'K02114'} | M00157 |
| GCA_007127855.1_ASM712785v1_genomic                          | {'K01834', 'K00927', 'K01689', 'K01803', 'K00134', 'K00873'}                     | M00002 |
| GCA_007127855.1_ASM712785v1_genomic                          | {'K02108', 'K02109', 'K02112', 'K02111', 'K02115', 'K02113', 'K02114'}           | M00157 |
| GCA_013333645.2_ASM1333364v2_genomic                         | {'K01834', 'K01689', 'K00873'}                                                   | M00002 |
| GCA_013333645.2_ASM1333364v2_genomic                         | {'K02108', 'K02115', 'K02110', 'K02113', 'K02109', 'K02112', 'K02111', 'K02114'} | M00157 |
| GCA_015999865.1_ASM1599986v1_genomic                         | {'K00927', 'K01803', 'K00134', 'K00873'}                                         | M00002 |
| GCA_015999865.1_ASM1599986v1_genomic                         | {'K02108', 'K02115', 'K02110', 'K02113', 'K02109', 'K02112', 'K02111', 'K02114'} | M00157 |
| GCA_022828255.1_ASM2282825v1_genomic                         | {'K01834', 'K00927', 'K01689', 'K01803', 'K00134', 'K00873'}                     | M00002 |
| GCA_022828255.1_ASM2282825v1_genomic                         | {'K02108', 'K02115', 'K02110', 'K02113', 'K02109', 'K02112', 'K02111', 'K02114'} | M00157 |
| R0170300270_tooth_RAH.megahit.bin.24                         | {'K00927', 'K01689', 'K01803', 'K00134', 'K00873'}                               | M00002 |
| R0170300270_tooth_RAH.megahit.bin.24                         | {'K02108', 'K02115', 'K02110', 'K02113', 'K02109', 'K02112', 'K02111', 'K02114'} | M00157 |
| GCA_016700355.1_ASM1670035v1_genomic                         | {'K00927', 'K01803', 'K00134', 'K00873'}                                         | M00002 |
| GCA_016700355.1_ASM1670035v1_genomic                         | {'K02108', 'K02109', 'K02112', 'K02111', 'K02115', 'K02113', 'K02114'}           | M00157 |
| R0170300200_tooth_RA.megahit.bin.49                          | {'K00927', 'K01689', 'K01803', 'K00134', 'K00873'}                               | M00002 |
| R0170300200_tooth_RA.megahit.bin.49                          | {'K02108', 'K02115', 'K02110', 'K02113', 'K02109', 'K02112', 'K02111', 'K02114'} | M00157 |
| YS000410_saliva.spades.bin.12                                | {'K00927', 'K01689', 'K01803', 'K00134', 'K00873'}                               | M00002 |
| YS000410_saliva.spades.bin.12                                | {'K02108', 'K02115', 'K02110', 'K02113', 'K02109', 'K02112', 'K02111', 'K02114'} | M00157 |
| R0170300106_tooth_RA.megahit.bin.44                          | {'K00927', 'K01689', 'K01803', 'K00134', 'K00873'}                               | M00002 |
| R0170300106_tooth_RA.megahit.bin.44                          | {'K02108', 'K02115', 'K02110', 'K02113', 'K02109', 'K02112', 'K02111', 'K02114'} | M00157 |
| RSZYD18078225_A_saliva.metaspades.bin.17                     | {'K01834', 'K00927', 'K01689', 'K01803', 'K00134', 'K00873'}                     | M00002 |
| GCA_002421785.1_ASM242178v1_genomic                          | {'K01834', 'K00927', 'K01689', 'K01803', 'K00134', 'K00873'}                     | M00002 |
| GCA_002421785.1_ASM242178v1_genomic                          | {'K02108', 'K02115', 'K02110', 'K02113', 'K02109', 'K02112', 'K02111', 'K02114'} | M00157 |
| GCA_946414465.1_SRR12081303_bin.63_metaWRAP_v1.3_MAG_genomic | {'K15633', 'K00927', 'K01689', 'K01803', 'K00134', 'K00873'}                     | M00002 |
| GCA_946414465.1_SRR12081303_bin.63_metaWRAP_v1.3_MAG_genomic | {'K01897'}                                                                       | M00086 |
| GCA_946414465.1_SRR12081303_bin.63_metaWRAP_v1.3_MAG_genomic | {'K00925', 'K13788'}                                                             | M00579 |
| RSZYD18187914_A_saliva.metaspades.bin.1                      | {'K01834', 'K00927', 'K01689', 'K01803', 'K00134', 'K00873'}                     | M00002 |
| RSZYD18187914_A_saliva.metaspades.bin.1                      | {'K02108', 'K02109', 'K02110', 'K02113', 'K02114'}                               | M00157 |
| GCA_947165975.1_SRR8387714_bin.97_metaWRAP_v1.3_MAG_genomic  | {'K15633', 'K00927', 'K01689', 'K01803', 'K00134', 'K00873'}                     | M00002 |
| GCA_947165975.1_SRR8387714_bin.97_metaWRAP_v1.3_MAG_genomic  | {'K01897'}                                                                       | M00086 |
| GCA_947165975.1_SRR8387714_bin.97_metaWRAP_v1.3_MAG_genomic  | {'K00925', 'K13788'}                                                             | M00579 |
| GCA_027446965.1_ASM2744696v1_genomic                         | {'K02108', 'K02115', 'K02110', 'K02113', 'K02109', 'K02112', 'K02111', 'K02114'} | M00157 |
| GCA_027446965.1_ASM2744696v1_genomic                         | {'K02298', 'K02300', 'K02297', 'K02299'}                                         | M00417 |
| R0170300200_tooth_RA.megahit.bin.29                          | {'K01834', 'K00927', 'K01689', 'K01803', 'K00134', 'K00873'}                     | M00002 |
| YS000259_saliva.spades.bin.14                                | {'K00927', 'K01689', 'K01803', 'K00134', 'K00873'}                               | M00002 |
| GCA_945873065.1_SRR15732359_bin.18_metaWRAP_v1.3_MAG_genomic | {'K01834', 'K01689', 'K00873'}                                                   | M00002 |
| GCA_945873065.1_SRR15732359_bin.18_metaWRAP_v1.3_MAG_genomic | {'K01897'}                                                                       | M00086 |
| GCA_945873065.1_SRR15732359_bin.18_metaWRAP_v1.3_MAG_genomic | {'K02108', 'K02115', 'K02110', 'K02113', 'K02109', 'K02112', 'K02111', 'K02114'} | M00157 |



|                                                              |                                                                                  |        |
|--------------------------------------------------------------|----------------------------------------------------------------------------------|--------|
| GCA_001790515.1_ASM179051v1_genomic                          | {'K00927', 'K01803', 'K00134', 'K00873'}                                         | M00002 |
| GCA_001790515.1_ASM179051v1_genomic                          | {'K02108', 'K02112', 'K02111', 'K02115', 'K02110', 'K02113', 'K02114'}           | M00157 |
| GCA_001790515.1_ASM179051v1_genomic                          | {'K02298', 'K02300', 'K02297', 'K02299'}                                         | M00417 |
| GCA_934725355.1_ERR7738173_bin.40_genomic                    | {'K01834', 'K00927', 'K01689', 'K01803', 'K00134', 'K00873'}                     | M00002 |
| GCA_016789655.1_ASM1678965v1_genomic                         | {'K01834', 'K00927', 'K15634', 'K01689', 'K01803', 'K00134', 'K00873'}           | M00002 |
| GCA_016789655.1_ASM1678965v1_genomic                         | {'K02108', 'K02115', 'K02110', 'K02113', 'K02109', 'K02112', 'K02111', 'K02114'} | M00157 |
| GCA_016789655.1_ASM1678965v1_genomic                         | {'K02298', 'K02300', 'K02297', 'K02299'}                                         | M00417 |
| RSZYD18078259_A_saliva.metaspades.bin.22                     | {'K15633', 'K00927', 'K01689', 'K01803', 'K00134', 'K00873'}                     | M00002 |
| RSZYD18078259_A_saliva.metaspades.bin.22                     | {'K00625', 'K00925'}                                                             | M00579 |
| GCA_017431085.1                                              | {'K15633', 'K00927', 'K01689', 'K01803', 'K00134', 'K00873'}                     | M00002 |
| GCA_017431085.1                                              | {'K01897'}                                                                       | M00086 |
| GCA_017431085.1                                              | {'K00625', 'K00925'}                                                             | M00579 |
| GCA_017514805.1_ASM1751480v1_genomic                         | {'K15633', 'K00927', 'K01689', 'K01803', 'K00134', 'K00873'}                     | M00002 |
| GCA_017514805.1_ASM1751480v1_genomic                         | {'K00625', 'K00925'}                                                             | M00579 |
| RSZYD18078262_A_saliva.metaspades.bin.27                     | {'K01834', 'K00927', 'K01689', 'K01803', 'K00134', 'K00873'}                     | M00002 |
| RSZYD18078262_A_saliva.metaspades.bin.27                     | {'K02108', 'K02115', 'K02110', 'K02113', 'K02109', 'K02112', 'K02111', 'K02114'} | M00157 |
| RSZYD18078115_A_saliva.metaspades.bin.19                     | {'K15633', 'K00927', 'K01689', 'K01803', 'K00134', 'K00873'}                     | M00002 |
| RSZYD18078115_A_saliva.metaspades.bin.19                     | {'K00625', 'K00925'}                                                             | M00579 |
| SZAXPI018406-56_RA_saliva.metaspades.bin.71                  | {'K15633', 'K00927', 'K01689', 'K01803', 'K00134', 'K00873'}                     | M00002 |
| SZAXPI018406-56_RA_saliva.metaspades.bin.71                  | {'K01897'}                                                                       | M00086 |
| RSZYD18078623_A_saliva.metaspades.bin.44                     | {'K01834', 'K00927', 'K01689', 'K01803', 'K00134', 'K00873'}                     | M00002 |
| RSZAXPI002603-21_RA_dental.metaspades.bin.30                 | {'K01834', 'K00927', 'K01689', 'K01803', 'K00134', 'K00873'}                     | M00002 |
| GCA_017512045.1                                              | {'K15633', 'K00927', 'K01689', 'K01803', 'K00134', 'K00873'}                     | M00002 |
| YS000273_saliva.spades.bin.9                                 | {'K01834', 'K00927', 'K01689', 'K01803', 'K00134', 'K00873'}                     | M00002 |
| YS000273_saliva.spades.bin.9                                 | {'K02108', 'K02109', 'K02112', 'K02111', 'K02115', 'K02110', 'K02113'}           | M00157 |
| ERR2764806.metaspades.bin.18                                 | {'K01834', 'K00927', 'K01689', 'K01803', 'K00134', 'K00873'}                     | M00002 |
| ERR2764806.metaspades.bin.18                                 | {'K02108', 'K02115', 'K02110', 'K02113', 'K02109', 'K02112', 'K02111', 'K02114'} | M00157 |
| R0170300262_tooth_RAH.megahit.bin.134                        | {'K00927', 'K01689', 'K01803', 'K00134', 'K00873'}                               | M00002 |
| R0170300262_tooth_RAH.megahit.bin.134                        | {'K02108', 'K02115', 'K02110', 'K02113', 'K02109', 'K02112', 'K02111', 'K02114'} | M00157 |
| R0170300256_tooth_RAH.megahit.bin.10                         | {'K01834', 'K01689', 'K01803', 'K00134', 'K00873'}                               | M00002 |
| R0170300256_tooth_RAH.megahit.bin.10                         | {'K02108', 'K02115', 'K02110', 'K02113', 'K02109', 'K02112', 'K02111', 'K02114'} | M00157 |
| RDPYD18300405_A_saliva.metaspades.bin.82                     | {'K01834', 'K01689', 'K00873'}                                                   | M00002 |
| RDPYD18300405_A_saliva.metaspades.bin.82                     | {'K02108', 'K02115', 'K02110', 'K02113', 'K02109', 'K02112', 'K02111', 'K02114'} | M00157 |
| GCA_001897295.1_ASM189729v1_genomic                          | {'K00927', 'K01803', 'K00134', 'K00873'}                                         | M00002 |
| GCA_001897295.1_ASM189729v1_genomic                          | {'K02108', 'K02115', 'K02110', 'K02113', 'K02109', 'K02112', 'K02111', 'K02114'} | M00157 |
| GCA_001897295.1_ASM189729v1_genomic                          | {'K02298', 'K02300', 'K02297', 'K02299'}                                         | M00417 |
| GCA_013333625.2_ASM1333362v2_genomic                         | {'K01834', 'K01689', 'K01803', 'K00134', 'K00873'}                               | M00002 |
| GCA_013333625.2_ASM1333362v2_genomic                         | {'K02108', 'K02115', 'K02110', 'K02113', 'K02109', 'K02112', 'K02111', 'K02114'} | M00157 |
| R0170300284_tooth_RAH.megahit.bin.10                         | {'K00927', 'K01689', 'K01803', 'K00134', 'K00873'}                               | M00002 |
| R0170300284_tooth_RAH.megahit.bin.10                         | {'K02108', 'K02115', 'K02110', 'K02113', 'K02109', 'K02112', 'K02111', 'K02114'} | M00157 |
| R0170300051_tooth_RA.megahit.bin.6                           | {'K15633', 'K00927', 'K01689', 'K01803', 'K00134', 'K00873'}                     | M00002 |
| R0170300051_tooth_RA.megahit.bin.6                           | {'K00625', 'K00925'}                                                             | M00579 |
| GCA_025934715.1_ASM2593471v1_genomic                         | {'K02108', 'K02115', 'K02110', 'K02113', 'K02109', 'K02112', 'K02111', 'K02114'} | M00157 |
| GCA_025934715.1_ASM2593471v1_genomic                         | {'K02298', 'K02300', 'K02297', 'K02299'}                                         | M00417 |
| R0170300381_saliva_RAH.megahit.bin.27                        | {'K01834', 'K00927', 'K01689', 'K01803', 'K00134', 'K00873'}                     | M00002 |
| R0170300381_saliva_RAH.megahit.bin.27                        | {'K02108', 'K02112', 'K02114'}                                                   | M00157 |
| R0170300121_tooth_RA.megahit.bin.23                          | {'K01834', 'K00927', 'K01689', 'K01803', 'K00134', 'K00873'}                     | M00002 |
| R0170300301_tooth_RAH.megahit.bin.99                         | {'K01834', 'K01689', 'K01803', 'K00134', 'K00873'}                               | M00002 |
| R0170300301_tooth_RAH.megahit.bin.99                         | {'K02108', 'K02115', 'K02110', 'K02113', 'K02109', 'K02112', 'K02111', 'K02114'} | M00157 |
| R0170300115_tooth_RA.megahit.bin.91                          | {'K01834', 'K00927', 'K01689', 'K01803', 'K00134', 'K00873'}                     | M00002 |
| YS000066_saliva.spades.bin.24                                | {'K01834', 'K00927', 'K01689', 'K01803', 'K00134', 'K00873'}                     | M00002 |
| YS000066_saliva.spades.bin.24                                | {'K02108', 'K02109', 'K02112', 'K02111', 'K02115', 'K02110', 'K02113'}           | M00157 |
| R0170300118_tooth_RA.megahit.bin.74                          | {'K15633', 'K00927', 'K01689', 'K01803', 'K00134', 'K00873'}                     | M00002 |
| R0170300118_tooth_RA.megahit.bin.74                          | {'K02108', 'K02115', 'K02110', 'K02113', 'K02109', 'K02112', 'K02111', 'K02114'} | M00157 |
| GCA_017404485.1                                              | {'K15633', 'K00927', 'K01689', 'K01803', 'K00134', 'K00873'}                     | M00002 |
| GCA_017404485.1                                              | {'K01897'}                                                                       | M00086 |
| GCA_017404485.1                                              | {'K00625', 'K00925'}                                                             | M00579 |
| RSZAXPI002636-95_RA_dental.metaspades.bin.22                 | {'K01834', 'K00927', 'K01689', 'K01803', 'K00134', 'K00873'}                     | M00002 |
| RSZAXPI002636-95_RA_dental.metaspades.bin.22                 | {'K02108', 'K02109', 'K02112', 'K02111', 'K02115', 'K02110', 'K02114'}           | M00157 |
| YS000553_saliva.spades.bin.6                                 | {'K01834', 'K00927', 'K01689', 'K01803', 'K00134', 'K00873'}                     | M00002 |
| YS000553_saliva.spades.bin.6                                 | {'K02108', 'K02115', 'K02110', 'K02113', 'K02109', 'K02112', 'K02111', 'K02114'} | M00157 |
| GCA_005697395.1_ASM569739v1_genomic                          | {'K01834', 'K00927', 'K01689', 'K01803', 'K00134', 'K00873'}                     | M00002 |
| GCA_005697395.1_ASM569739v1_genomic                          | {'K02108', 'K02115', 'K02110', 'K02113', 'K02109', 'K02112', 'K02111', 'K02114'} | M00157 |
| RSZYD18187059_A_saliva.metaspades.bin.27                     | {'K01834', 'K00927', 'K01689', 'K01803', 'K00134', 'K00873'}                     | M00002 |
| RSZYD18187059_A_saliva.metaspades.bin.27                     | {'K00625', 'K00925'}                                                             | M00579 |
| GCA_002437225.1_ASM243722v1_genomic                          | {'K01834', 'K00927', 'K15634', 'K01689', 'K01803', 'K00134', 'K00873'}           | M00002 |
| GCA_002437225.1_ASM243722v1_genomic                          | {'K01897'}                                                                       | M00086 |
| GCA_016700395.1_ASM1670039v1_genomic                         | {'K00927', 'K01803', 'K00134', 'K00873'}                                         | M00002 |
| GCA_016700395.1_ASM1670039v1_genomic                         | {'K02108', 'K02115', 'K02110', 'K02113', 'K02109', 'K02112', 'K02111', 'K02114'} | M00157 |
| R0170300307_tooth_RAH.megahit.bin.81                         | {'K01834', 'K01689', 'K01803', 'K00134', 'K00873'}                               | M00002 |
| R0170300307_tooth_RAH.megahit.bin.81                         | {'K02108', 'K02115', 'K02110', 'K02113', 'K02109', 'K02112', 'K02111', 'K02114'} | M00157 |
| GCA_017511925.1                                              | {'K15633', 'K00927', 'K01689', 'K01803', 'K00134', 'K00873'}                     | M00002 |
| GCA_017511925.1                                              | {'K01897'}                                                                       | M00086 |
| GCA_017511925.1                                              | {'K00625', 'K00925'}                                                             | M00579 |
| SZAXPI018095-16_RA_dental.metaspades.bin.15                  | {'K15633', 'K00927', 'K01689', 'K01803', 'K00134', 'K00873'}                     | M00002 |
| SZAXPI018095-16_RA_dental.metaspades.bin.15                  | {'K02108', 'K02115', 'K02110', 'K02113', 'K02109', 'K02112', 'K02111', 'K02114'} | M00157 |
| GCA_027338765.1_ASM2733876v1_genomic                         | {'K01834', 'K00927', 'K01803', 'K00134', 'K00873'}                               | M00002 |
| GCA_027338765.1_ASM2733876v1_genomic                         | {'K02108', 'K02115', 'K02110', 'K02113', 'K02109', 'K02112', 'K02111', 'K02114'} | M00157 |
| SZAXPI018274-87_RA_dental.metaspades.bin.42                  | {'K00927', 'K01689', 'K01803', 'K00134', 'K00873'}                               | M00002 |
| SZAXPI018274-87_RA_dental.metaspades.bin.42                  | {'K02108', 'K02115', 'K02110', 'K02113', 'K02109', 'K02112', 'K02111', 'K02114'} | M00157 |
| YS000126_saliva.spades.bin.17                                | {'K01834', 'K00927', 'K01689', 'K01803', 'K00134', 'K00873'}                     | M00002 |
| YS000126_saliva.spades.bin.17                                | {'K02108', 'K02109', 'K02111', 'K02115', 'K02110', 'K02113'}                     | M00157 |
| R0170300194_tooth_RA.megahit.bin.127                         | {'K01834', 'K01689', 'K01803', 'K00134', 'K00873'}                               | M00002 |
| R0170300194_tooth_RA.megahit.bin.127                         | {'K02108', 'K02115', 'K02110', 'K02113', 'K02109', 'K02112', 'K02111', 'K02114'} | M00157 |
| GCA_947367495.1_SRR15429271_bin.12_metawrap_v1.3_MAG_genomic | {'K15633', 'K00927', 'K01689', 'K01803', 'K00134', 'K00873'}                     | M00002 |
| R0170300079_tooth_RA.megahit.bin.64                          | {'K00927', 'K01803', 'K00134', 'K00873'}                                         | M00002 |
| R0170300079_tooth_RA.megahit.bin.64                          | {'K02108', 'K02115', 'K02110', 'K02113', 'K02109', 'K02112', 'K02111', 'K02114'} | M00157 |
| RDPYD18098996_A_saliva.metaspades.bin.18                     | {'K01834', 'K00927', 'K01689', 'K01803', 'K00134', 'K00873'}                     | M00002 |
| GCA_903836325.1_freshwater_MAG_---KR2_bin-0178_genomic       | {'K00927', 'K01803', 'K00134', 'K00873'}                                         | M00002 |
| GCA_903836325.1_freshwater_MAG_---KR2_bin-0178_genomic       | {'K02108', 'K02115', 'K02110', 'K02113', 'K02109', 'K02112', 'K02111', 'K02114'} | M00157 |
| RSZYD18078253_A_saliva.metaspades.bin.36                     | {'K01834', 'K00927', 'K01689', 'K01803', 'K00134', 'K00873'}                     | M00002 |
| RSZYD18078253_A_saliva.metaspades.bin.36                     | {'K02108', 'K02115', 'K02110', 'K02113', 'K02109', 'K02112', 'K02111', 'K02114'} | M00157 |
| GCA_027427155.1_ASM2742715v1_genomic                         | {'K02108', 'K02115', 'K02110', 'K02113', 'K02109', 'K02112', 'K02111', 'K02114'} | M00157 |
| GCA_027427155.1_ASM2742715v1_genomic                         | {'K02298', 'K02297', 'K02299'}                                                   | M00417 |
| R0170300206_tooth_RA.megahit.bin.2                           | {'K15633', 'K00927', 'K01689', 'K01803', 'K00134', 'K00873'}                     | M00002 |
| R0170300206_tooth_RA.megahit.bin.2                           | {'K00625', 'K00925'}                                                             | M00579 |
| RDPYD18088792_A_saliva.metaspades.bin.66                     | {'K01834', 'K00927', 'K01689', 'K01803', 'K00134', 'K00873'}                     | M00002 |
| RDPYD18088792_A_saliva.metaspades.bin.66                     | {'K02108', 'K02115', 'K02110', 'K02113', 'K02109', 'K02112', 'K02111', 'K02114'} | M00157 |
| R0170300302_tooth_RAH.megahit.bin.125                        | {'K01834', 'K00927', 'K01689', 'K01803', 'K00134', 'K00873'}                     | M00002 |
| R0170300302_tooth_RAH.megahit.bin.125                        | {'K02108', 'K02115', 'K02110', 'K02113', 'K02109', 'K02112', 'K02111', 'K02114'} | M00157 |
| RSZYD18078490_A_saliva.metaspades.bin.38                     | {'K01834', 'K00927', 'K01689', 'K01803', 'K00134', 'K00873'}                     | M00002 |
| RSZYD18078490_A_saliva.metaspades.bin.38                     | {'K02108', 'K02115', 'K02110', 'K02113', 'K02109', 'K02112', 'K02111', 'K02114'} | M00157 |
| R0170300181_tooth_RA.megahit.bin.96                          | {'K15633', 'K00927', 'K01689', 'K01803', 'K00134', 'K00873'}                     | M00002 |
| R0170300181_tooth_RA.megahit.bin.96                          | {'K00625', 'K00925'}                                                             | M00579 |
| R0170300251_tooth_RAH.megahit.bin.14                         | {'K01834', 'K01689', 'K01803', 'K00134', 'K00873'}                               | M00002 |

|                                                              |                                                                                  |        |
|--------------------------------------------------------------|----------------------------------------------------------------------------------|--------|
| R0170300251 tooth RAH.megahit.bin.14                         | {'K02108', 'K02115', 'K02110', 'K02113', 'K02109', 'K02112', 'K02111', 'K02114'} | M00157 |
| RDPYD18201644 A saliva.metaspades.bin.16                     | {'K01834', 'K00927', 'K01689', 'K01803', 'K00134', 'K00873'}                     | M00002 |
| RDPYD18201644 A saliva.metaspades.bin.16                     | {'K02108', 'K02115', 'K02110', 'K02113', 'K02109', 'K02112', 'K02111', 'K02114'} | M00157 |
| SZAXPI018436-90 RA saliva.metaspades.bin.9                   | {'K01834', 'K00927', 'K01689', 'K01803', 'K00134', 'K00873'}                     | M00002 |
| GCA_017406775.1                                              | {'K15633', 'K00927', 'K01689', 'K01803', 'K00134', 'K00873'}                     | M00002 |
| GCA_017406775.1                                              | {'K01897'}                                                                       | M00086 |
| GCA_017406775.1                                              | {'K00925', 'K00625', 'K13788'}                                                   | M00579 |
| GCA_004138395.1 ASM413839v1_genomic                          | {'K15633', 'K00927', 'K01689', 'K01803', 'K00134', 'K00873'}                     | M00002 |
| GCA_004138395.1 ASM413839v1_genomic                          | {'K01897'}                                                                       | M00086 |
| GCA_004138395.1 ASM413839v1_genomic                          | {'K00625', 'K00925'}                                                             | M00579 |
| R0170300240 tooth RAH.megahit.bin.61                         | {'K00927', 'K01689', 'K01803', 'K00134', 'K00873'}                               | M00002 |
| R0170300240 tooth RAH.megahit.bin.61                         | {'K02108', 'K02115', 'K02110', 'K02113', 'K02109', 'K02112', 'K02111', 'K02114'} | M00157 |
| GCA_947429035.1_SRR19981115_bin.12_metawrap_v1.3_MAG_genomic | {'K15633', 'K00927', 'K01689', 'K01803', 'K00134', 'K00873'}                     | M00002 |
| GCA_017511965.1                                              | {'K15633', 'K00927', 'K01689', 'K01803', 'K00134', 'K00873'}                     | M00002 |
| GCA_017511965.1                                              | {'K01897'}                                                                       | M00086 |
| GCA_017511965.1                                              | {'K00925', 'K13788'}                                                             | M00579 |
| RSZYD18078542 A saliva.metaspades.bin.52                     | {'K15633', 'K01689', 'K00927', 'K00873'}                                         | M00002 |
| RSZYD18078695 A saliva.metaspades.bin.25                     | {'K15633', 'K00927', 'K01689', 'K01803', 'K00134', 'K00873'}                     | M00002 |
| RSZYD18078695 A saliva.metaspades.bin.25                     | {'K00625', 'K00925'}                                                             | M00579 |
| YS000758 saliva.spades.bin.5                                 | {'K01834', 'K00927', 'K01689', 'K01803', 'K00134', 'K00873'}                     | M00002 |
| YS000758 saliva.spades.bin.5                                 | {'K02108', 'K02109', 'K02110', 'K02113'}                                         | M00157 |
| GCA_002331045.1_ASM233104v1_genomic                          | {'K00927', 'K01803', 'K00134', 'K00873'}                                         | M00002 |
| GCA_002331045.1_ASM233104v1_genomic                          | {'K02108', 'K02115', 'K02110', 'K02113', 'K02109', 'K02112', 'K02111', 'K02114'} | M00157 |
| GCA_002331045.1_ASM233104v1_genomic                          | {'K02298', 'K02300', 'K02297', 'K02299'}                                         | M00417 |
| GCA_027427015.1_ASM2742701v1_genomic                         | {'K00927', 'K01803', 'K00134', 'K00873'}                                         | M00002 |
| GCA_027427015.1_ASM2742701v1_genomic                         | {'K02108', 'K02115', 'K02110', 'K02113', 'K02109', 'K02112', 'K02111', 'K02114'} | M00157 |
| GCA_027426875.1_ASM2742687v1_genomic                         | {'K00927', 'K15634', 'K01803', 'K00134', 'K00873'}                               | M00002 |
| GCA_027426875.1_ASM2742687v1_genomic                         | {'K02108', 'K02115', 'K02110', 'K02113', 'K02109', 'K02112', 'K02111', 'K02114'} | M00157 |
| GCA_027426875.1_ASM2742687v1_genomic                         | {'K02298', 'K02300', 'K02297', 'K02299'}                                         | M00417 |
| RSZYD18187690 A saliva.metaspades.bin.43                     | {'K15633', 'K00927', 'K01689', 'K01803', 'K00134', 'K00873'}                     | M00002 |
| RSZYD18187690 A saliva.metaspades.bin.43                     | {'K00625', 'K00925'}                                                             | M00579 |
| R0170300129 tooth RA.megahit.bin.17                          | {'K00927', 'K01689', 'K01803', 'K00134', 'K00873'}                               | M00002 |
| R0170300129 tooth RA.megahit.bin.17                          | {'K02108', 'K02115', 'K02110', 'K02113', 'K02109', 'K02112', 'K02111', 'K02114'} | M00157 |
| ERR2764804.metaspades.bin.10                                 | {'K01834', 'K00927', 'K15634', 'K01689', 'K01803', 'K00134', 'K00873'}           | M00002 |
| R0170300051 tooth RA.megahit.bin.71                          | {'K00927', 'K01689', 'K01803', 'K00134', 'K00873'}                               | M00002 |
| R0170300051 tooth RA.megahit.bin.71                          | {'K02108', 'K02115', 'K02110', 'K02113', 'K02109', 'K02112', 'K02111', 'K02114'} | M00157 |
| GCA_017432425.1                                              | {'K15633', 'K00927', 'K01689', 'K01803', 'K00134', 'K00873'}                     | M00002 |
| SZAXPI018354-19 RA saliva.metaspades.bin.46                  | {'K01834', 'K00927', 'K01689', 'K01803', 'K00134', 'K00873'}                     | M00002 |
| R0170300219 tooth RA.megahit.bin.90                          | {'K01834', 'K00927', 'K01689', 'K01803', 'K00873'}                               | M00002 |
| RDPYD18300395 A saliva.metaspades.bin.59                     | {'K01834', 'K00927', 'K01689', 'K01803', 'K00134', 'K00873'}                     | M00002 |
| RDPYD18300395 A saliva.metaspades.bin.59                     | {'K02108', 'K02115', 'K02110', 'K02113', 'K02109', 'K02112', 'K02111', 'K02114'} | M00157 |
| RSZYD18187556 A saliva.metaspades.bin.16                     | {'K01834', 'K00927', 'K01689', 'K01803', 'K00134', 'K00873'}                     | M00002 |
| RSZYD18187556 A saliva.metaspades.bin.16                     | {'K02108', 'K02115', 'K02110', 'K02113', 'K02109', 'K02112', 'K02111', 'K02114'} | M00157 |
| R0170300266 tooth RAH.megahit.bin.24                         | {'K01834', 'K00927', 'K01689', 'K01803', 'K00134', 'K00873'}                     | M00002 |
| SZAXPI018171-25_1 RA dental.metaspades.bin.52                | {'K01834', 'K00927', 'K01689', 'K01803', 'K00134', 'K00873'}                     | M00002 |
| SZAXPI018171-25_1 RA dental.metaspades.bin.52                | {'K02108', 'K02115', 'K02110', 'K02113', 'K02109', 'K02112', 'K02111', 'K02114'} | M00157 |
| R0170300249 tooth RAH.megahit.bin.28                         | {'K01834', 'K00927', 'K01689', 'K01803', 'K00134', 'K00873'}                     | M00002 |
| R0170300249 tooth RAH.megahit.bin.28                         | {'K00625', 'K00925'}                                                             | M00579 |
| GCA_027427135.1_ASM2742713v1_genomic                         | {'K02108', 'K02115', 'K02110', 'K02113', 'K02109', 'K02112', 'K02111', 'K02114'} | M00157 |
| GCA_027427135.1_ASM2742713v1_genomic                         | {'K02298', 'K02300', 'K02297', 'K02299'}                                         | M00417 |
| R0170300285 tooth RAH.megahit.bin.21                         | {'K01834', 'K00927', 'K01689', 'K01803', 'K00134', 'K00873'}                     | M00002 |
| RSZYD18187281 A saliva.metaspades.bin.17                     | {'K01834', 'K00927', 'K01689', 'K01803', 'K00134', 'K00873'}                     | M00002 |
| RSZYD18187281 A saliva.metaspades.bin.17                     | {'K02108', 'K02115', 'K02110', 'K02113', 'K02109', 'K02112', 'K02111', 'K02114'} | M00157 |
| GCA_027328705.1_ASM2732870v1_genomic                         | {'K00927', 'K15634', 'K01803', 'K00134', 'K00873'}                               | M00002 |
| GCA_027328705.1_ASM2732870v1_genomic                         | {'K02108', 'K02115', 'K02110', 'K02113', 'K02109', 'K02112', 'K02111', 'K02114'} | M00157 |
| GCA_027328705.1_ASM2732870v1_genomic                         | {'K02298', 'K02300', 'K02297', 'K02299'}                                         | M00417 |
| GCA_013316435.1_ASM1331643v1_genomic                         | {'K15633', 'K00927', 'K01689', 'K01803', 'K00134', 'K00873'}                     | M00002 |
| GCA_020427985.1_ASM2042798v1_genomic                         | {'K00927', 'K15634', 'K01803', 'K00134', 'K00873'}                               | M00002 |
| GCA_020427985.1_ASM2042798v1_genomic                         | {'K02108', 'K02115', 'K02110', 'K02113', 'K02109', 'K02112', 'K02111', 'K02114'} | M00157 |
| GCA_020427985.1_ASM2042798v1_genomic                         | {'K02298', 'K02300', 'K02297', 'K02299'}                                         | M00417 |
| GCA_017514865.1_ASM1751486v1_genomic                         | {'K15633', 'K00927', 'K01689', 'K01803', 'K00134', 'K00873'}                     | M00002 |
| GCA_017514865.1_ASM1751486v1_genomic                         | {'K01897'}                                                                       | M00086 |
| R0170300139 tooth RA.megahit.bin.99                          | {'K00927', 'K01689', 'K01803', 'K00134', 'K00873'}                               | M00002 |
| R0170300139 tooth RA.megahit.bin.99                          | {'K02108', 'K02109', 'K02112', 'K02111', 'K02110', 'K02113', 'K02114'}           | M00157 |
| R0170300055 tooth RA.megahit.bin.35                          | {'K15633', 'K00927', 'K01689', 'K01803', 'K00134', 'K00873'}                     | M00002 |
| R0170300055 tooth RA.megahit.bin.35                          | {'K00625', 'K00925'}                                                             | M00579 |
| R0170300272 tooth RAH.megahit.bin.12                         | {'K00927', 'K01689', 'K01803', 'K00134', 'K00873'}                               | M00002 |
| R0170300272 tooth RAH.megahit.bin.12                         | {'K02108', 'K02115', 'K02110', 'K02113', 'K02109', 'K02112', 'K02111', 'K02114'} | M00157 |
| YS000922 saliva.spades.bin.6                                 | {'K01834', 'K00927', 'K01689', 'K01803', 'K00134', 'K00873'}                     | M00002 |
| YS000922 saliva.spades.bin.6                                 | {'K02108', 'K02109', 'K02111', 'K02115', 'K02110', 'K02113', 'K02114'}           | M00157 |
| GCA_027327265.1_ASM2732726v1_genomic                         | {'K00927', 'K01803', 'K00134', 'K00873'}                                         | M00002 |
| GCA_027327265.1_ASM2732726v1_genomic                         | {'K02108', 'K02109', 'K02112', 'K02111', 'K02115', 'K02110', 'K02114'}           | M00157 |
| GCA_027327265.1_ASM2732726v1_genomic                         | {'K02298', 'K02300', 'K02297', 'K02299'}                                         | M00417 |
| R0170300120 tooth RA.megahit.bin.28                          | {'K01834', 'K01689', 'K00873'}                                                   | M00002 |
| R0170300120 tooth RA.megahit.bin.28                          | {'K02108', 'K02115', 'K02110', 'K02113', 'K02109', 'K02112', 'K02111', 'K02114'} | M00157 |
| RDPYD18300192 A saliva.metaspades.bin.52                     | {'K01834', 'K01689', 'K00873'}                                                   | M00002 |
| RDPYD18300192 A saliva.metaspades.bin.52                     | {'K02108', 'K02115', 'K02110', 'K02113', 'K02109', 'K02112', 'K02111', 'K02114'} | M00157 |
| SZAXPI018271-62 RA dental.metaspades.bin.80                  | {'K00927', 'K01689', 'K01803', 'K00134', 'K00873'}                               | M00002 |
| SZAXPI018271-62 RA dental.metaspades.bin.80                  | {'K02108', 'K02115', 'K02110', 'K02113', 'K02109', 'K02112', 'K02111', 'K02114'} | M00157 |
| R0170300325 tooth RA.megahit.bin.8                           | {'K01834', 'K00927', 'K01689', 'K01803', 'K00134', 'K00873'}                     | M00002 |
| RSZAXPI002316-25 RAH dental.metaspades.bin.44                | {'K00927', 'K01689', 'K01803', 'K00134', 'K00873'}                               | M00002 |
| RSZAXPI002316-25 RAH dental.metaspades.bin.44                | {'K02108', 'K02115', 'K02110', 'K02113', 'K02109', 'K02112', 'K02111', 'K02114'} | M00157 |
| RSZYD18187316 A saliva.metaspades.bin.18                     | {'K01834', 'K00927', 'K01689', 'K01803', 'K00134', 'K00873'}                     | M00002 |
| YS000915 saliva.spades.bin.1                                 | {'K01834', 'K00927', 'K01689', 'K01803', 'K00134', 'K00873'}                     | M00002 |
| YS000915 saliva.spades.bin.1                                 | {'K02108', 'K02109', 'K02112', 'K02111', 'K02115', 'K02110', 'K02113'}           | M00157 |
| R0170300050 tooth RA.megahit.bin.47                          | {'K00927', 'K01689', 'K01803', 'K00134', 'K00873'}                               | M00002 |
| R0170300050 tooth RA.megahit.bin.47                          | {'K02108', 'K02115', 'K02110', 'K02113', 'K02109', 'K02112', 'K02111', 'K02114'} | M00157 |
| GCA_903925195.1_freshwater_MAG_---_YR_bin-4708_genomic       | {'K00927', 'K01803', 'K00134', 'K00873'}                                         | M00002 |
| GCA_903925195.1_freshwater_MAG_---_YR_bin-4708_genomic       | {'K02108', 'K02109', 'K02112', 'K02111', 'K02115', 'K02110', 'K02114'}           | M00157 |
| GCA_903925195.1_freshwater_MAG_---_YR_bin-4708_genomic       | {'K02298', 'K02300', 'K02297', 'K02299'}                                         | M00417 |
| RDPYD18300261 A saliva.metaspades.bin.29                     | {'K02112', 'K02115', 'K02114'}                                                   | M00157 |
| GCA_013289705.1_ASM1328970v1_genomic                         | {'K00927', 'K15634', 'K01803', 'K00134', 'K00873'}                               | M00002 |
| GCA_013289705.1_ASM1328970v1_genomic                         | {'K02108', 'K02109', 'K02112', 'K02111', 'K02115', 'K02110', 'K02114'}           | M00157 |
| GCA_013289705.1_ASM1328970v1_genomic                         | {'K02298', 'K02300', 'K02297', 'K02299'}                                         | M00417 |
| R0170300052 tooth RA.megahit.bin.29                          | {'K00927', 'K01689', 'K01803', 'K00134', 'K00873'}                               | M00002 |
| R0170300052 tooth RA.megahit.bin.29                          | {'K02108', 'K02115', 'K02110', 'K02113', 'K02109', 'K02112', 'K02111', 'K02114'} | M00157 |
| RSZYD18078147 A saliva.metaspades.bin.23                     | {'K01834', 'K00927', 'K01689', 'K01803', 'K00134', 'K00873'}                     | M00002 |
| RSZYD18078147 A saliva.metaspades.bin.23                     | {'K02108', 'K02115', 'K02110', 'K02113', 'K02109', 'K02112', 'K02111', 'K02114'} | M00157 |
| RSZYD18078011 A saliva.metaspades.bin.17                     | {'K15633', 'K00927', 'K01689', 'K01803', 'K00134', 'K00873'}                     | M00002 |
| RSZYD18078011 A saliva.metaspades.bin.17                     | {'K00625', 'K00925'}                                                             | M00579 |
| RSZYD18187484 A saliva.metaspades.bin.51                     | {'K01834', 'K00927', 'K01689', 'K01803', 'K00134', 'K00873'}                     | M00002 |
| RSZYD18187484 A saliva.metaspades.bin.51                     | {'K02108', 'K02115', 'K02110', 'K02113', 'K02109', 'K02112', 'K02111', 'K02114'} | M00157 |
| GCA_009785095.1_ASM978509v1_genomic                          | {'K15633', 'K00927', 'K01689', 'K01803', 'K00134', 'K00873'}                     | M00002 |
| GCA_009785095.1_ASM978509v1_genomic                          | {'K01897'}                                                                       | M00086 |
| GCA_009785095.1_ASM978509v1_genomic                          | {'K02108', 'K02115', 'K02110', 'K02113', 'K02109', 'K02112', 'K02111', 'K02114'} | M00157 |



|                                                              |                                                                                  |        |
|--------------------------------------------------------------|----------------------------------------------------------------------------------|--------|
| GCA_009785095.1_ASM978509v1_genomic                          | {'K00925', 'K00625', 'K13788'}                                                   | M00579 |
| R0170300213_tooth_RA.megahit.bin.95                          | {'K00927', 'K01689', 'K01803', 'K00134', 'K00873'}                               | M00002 |
| R0170300213_tooth_RA.megahit.bin.95                          | {'K02108', 'K02115', 'K02110', 'K02113', 'K02109', 'K02112', 'K02111', 'K02114'} | M00157 |
| RSZAXPI002603-21_RA_dental.metaspades.bin.63                 | {'K15633', 'K00927', 'K01689', 'K01803', 'K00134', 'K00873'}                     | M00002 |
| RSZAXPI002603-21_RA_dental.metaspades.bin.63                 | {'K00625', 'K00925'}                                                             | M00579 |
| RSZYD18187237_A_saliva.metaspades.bin.71                     | {'K01834', 'K00927', 'K01689', 'K01803', 'K00134', 'K00873'}                     | M00002 |
| RSZYD18187237_A_saliva.metaspades.bin.71                     | {'K02108', 'K02115', 'K02110', 'K02113', 'K02109', 'K02112', 'K02111', 'K02114'} | M00157 |
| RSZYD18187234_A_saliva.metaspades.bin.82                     | {'K15633', 'K00927', 'K01689', 'K01803', 'K00873'}                               | M00002 |
| RSZYD18187234_A_saliva.metaspades.bin.82                     | {'K00625', 'K00925'}                                                             | M00579 |
| RSZYD18187340_A_saliva.metaspades.bin.39                     | {'K01834', 'K00927', 'K01689', 'K01803', 'K00134', 'K00873'}                     | M00002 |
| RSZYD18187340_A_saliva.metaspades.bin.39                     | {'K02108', 'K02112', 'K02115', 'K02110', 'K02114'}                               | M00157 |
| SZAXPI018439-102_RA_saliva.metaspades.bin.34                 | {'K15633', 'K00927', 'K01689', 'K01803', 'K00134', 'K00873'}                     | M00002 |
| SZAXPI018439-102_RA_saliva.metaspades.bin.34                 | {'K00625', 'K00925'}                                                             | M00579 |
| RDPYD18098889_A_saliva.metaspades.bin.64                     | {'K01834', 'K00927', 'K01689', 'K01803', 'K00134', 'K00873'}                     | M00002 |
| RSZAXPI002460-93_2_RAH_saliva.metaspades.bin.17              | {'K01834', 'K00927', 'K01689', 'K01803', 'K00134', 'K00873'}                     | M00002 |
| RSZAXPI002460-93_2_RAH_saliva.metaspades.bin.17              | {'K02108', 'K02115', 'K02110', 'K02113', 'K02109', 'K02112', 'K02111', 'K02114'} | M00157 |
| RDPYD18300408_A_saliva.metaspades.bin.21                     | {'K01834', 'K00927', 'K01689', 'K01803', 'K00134', 'K00873'}                     | M00002 |
| RDPYD18300408_A_saliva.metaspades.bin.21                     | {'K02108', 'K02115', 'K02110', 'K02113', 'K02109', 'K02112', 'K02111', 'K02114'} | M00157 |
| GCA_947168545.1_SRR8387715_bin.82_metaWRAP_v1.3_MAG_genomic  | {'K15633', 'K00927', 'K01689', 'K01803', 'K00134', 'K00873'}                     | M00002 |
| GCA_947168545.1_SRR8387715_bin.82_metaWRAP_v1.3_MAG_genomic  | {'K01897'}                                                                       | M00086 |
| R0170300133_tooth_RA.megahit.bin.60                          | {'K01834', 'K00927', 'K01689', 'K01803', 'K00134', 'K00873'}                     | M00002 |
| GCA_947304395.1_SRR10912535_bin.78_metaWRAP_v1.3_MAG_genomic | {'K15633', 'K00927', 'K15634', 'K01803', 'K00134', 'K00873'}                     | M00002 |
| GCA_947304395.1_SRR10912535_bin.78_metaWRAP_v1.3_MAG_genomic | {'K01897'}                                                                       | M00086 |
| GCA_947304395.1_SRR10912535_bin.78_metaWRAP_v1.3_MAG_genomic | {'K00925', 'K00625', 'K13788'}                                                   | M00579 |
| R0170300105_tooth_RA.megahit.bin.100                         | {'K15633', 'K00927', 'K01689', 'K01803', 'K00134', 'K00873'}                     | M00002 |
| R0170300105_tooth_RA.megahit.bin.100                         | {'K02108', 'K02115', 'K02110', 'K02113', 'K02109', 'K02112', 'K02111', 'K02114'} | M00157 |
| GCA_023259925.1_ASM2325992v1_genomic                         | {'K02108', 'K02115', 'K02110', 'K02113', 'K02109', 'K02112', 'K02111', 'K02114'} | M00157 |
| GCA_023259925.1_ASM2325992v1_genomic                         | {'K02298', 'K02300', 'K02297', 'K02299'}                                         | M00417 |
| RSZAXPI002635-94_RA_dental.metaspades.bin.41                 | {'K01834', 'K00927', 'K01803', 'K00134', 'K00873'}                               | M00002 |
| YS000206_saliva.spades.bin.3                                 | {'K01834', 'K00927', 'K01689', 'K01803', 'K00134', 'K00873'}                     | M00002 |
| YS000206_saliva.spades.bin.3                                 | {'K02108', 'K02115', 'K02110', 'K02113', 'K02109', 'K02112', 'K02111', 'K02114'} | M00157 |
| R0170300224_tooth_RA.megahit.bin.6                           | {'K02108', 'K02115', 'K02110', 'K02113', 'K02109', 'K02112', 'K02111', 'K02114'} | M00157 |
| R0170300139_tooth_RA.megahit.bin.95                          | {'K01834', 'K00927', 'K01689', 'K01803', 'K00134', 'K00873'}                     | M00002 |
| GCA_017510445.1                                              | {'K15633', 'K00927', 'K01689', 'K01803', 'K00134', 'K00873'}                     | M00002 |
| GCA_017510445.1                                              | {'K01897'}                                                                       | M00086 |
| GCA_017510445.1                                              | {'K00625', 'K00925'}                                                             | M00579 |
| R0170300217_tooth_RA.megahit.bin.134                         | {'K15633', 'K00927', 'K01689', 'K01803', 'K00134', 'K00873'}                     | M00002 |
| R0170300217_tooth_RA.megahit.bin.134                         | {'K02108', 'K02115', 'K02110', 'K02113', 'K02109', 'K02112', 'K02111', 'K02114'} | M00157 |
| R0170300252_tooth_RAH.megahit.bin.31                         | {'K00927', 'K01689', 'K01803', 'K00134', 'K00873'}                               | M00002 |
| R0170300252_tooth_RAH.megahit.bin.31                         | {'K02108', 'K02115', 'K02110', 'K02113', 'K02109', 'K02112', 'K02111', 'K02114'} | M00157 |
| GCA_017404955.1                                              | {'K15633', 'K00927', 'K01689', 'K01803', 'K00134', 'K00873'}                     | M00002 |
| GCA_017404955.1                                              | {'K00625', 'K00925'}                                                             | M00579 |
| RDPYD18300076_A_saliva.metaspades.bin.3                      | {'K01834', 'K00927', 'K01689', 'K01803', 'K00134', 'K00873'}                     | M00002 |
| R0170300206_tooth_RA.megahit.bin.6                           | {'K01834', 'K00927', 'K01689', 'K01803', 'K00134', 'K00873'}                     | M00002 |
| RSZYD18078639_A_saliva.metaspades.bin.14                     | {'K01834', 'K00927', 'K01689', 'K01803', 'K00134', 'K00873'}                     | M00002 |
| RSZYD18078639_A_saliva.metaspades.bin.14                     | {'K02108', 'K02115', 'K02110', 'K02113', 'K02109', 'K02112', 'K02111', 'K02114'} | M00157 |
| RDPYD18098912_A_saliva.metaspades.bin.17                     | {'K01834', 'K00927', 'K01689', 'K01803', 'K00134', 'K00873'}                     | M00002 |
| RDPYD18098912_A_saliva.metaspades.bin.17                     | {'K02108', 'K02115', 'K02110', 'K02113', 'K02109', 'K02112', 'K02111', 'K02114'} | M00157 |
| SZAXPI018098-19_RA_dental.metaspades.bin.54                  | {'K00927', 'K01689', 'K01803', 'K00134', 'K00873'}                               | M00002 |
| SZAXPI018098-19_RA_dental.metaspades.bin.54                  | {'K02108', 'K02115', 'K02110', 'K02113', 'K02109', 'K02112', 'K02111', 'K02114'} | M00157 |
| R0170300141_tooth_RA.megahit.bin.64                          | {'K00927', 'K01689', 'K01803', 'K00134', 'K00873'}                               | M00002 |
| R0170300141_tooth_RA.megahit.bin.64                          | {'K02108', 'K02115', 'K02110', 'K02113', 'K02109', 'K02112', 'K02111', 'K02114'} | M00157 |
| R0170300294_tooth_RAH.megahit.bin.65                         | {'K00927', 'K01689', 'K01803', 'K00134', 'K00873'}                               | M00002 |
| R0170300294_tooth_RAH.megahit.bin.65                         | {'K02108', 'K02115', 'K02110', 'K02113', 'K02109', 'K02112', 'K02111', 'K02114'} | M00157 |
| RSZYD18187762_A_saliva.metaspades.bin.45                     | {'K01834', 'K00927', 'K01689', 'K01803', 'K00134', 'K00873'}                     | M00002 |
| RSZYD18187762_A_saliva.metaspades.bin.45                     | {'K02108', 'K02115', 'K02110', 'K02113', 'K02109', 'K02112', 'K02111', 'K02114'} | M00157 |
| GCA_002337155.1_ASM233715v1_genomic                          | {'K00927', 'K01803', 'K00134', 'K00873'}                                         | M00002 |
| GCA_002337155.1_ASM233715v1_genomic                          | {'K02108', 'K02115', 'K02110', 'K02113', 'K02109', 'K02112', 'K02111', 'K02114'} | M00157 |
| GCA_000503915.1_ASM50391v1_genomic                           | {'K00927', 'K01803', 'K00134', 'K00873'}                                         | M00002 |
| GCA_000503915.1_ASM50391v1_genomic                           | {'K02108', 'K02109', 'K02112', 'K02111', 'K02115', 'K02110', 'K02114'}           | M00157 |
| GCA_000503915.1_ASM50391v1_genomic                           | {'K02298', 'K02300', 'K02297', 'K02299'}                                         | M00417 |
| RSZYD18187345_A_saliva.metaspades.bin.42                     | {'K01834', 'K00927', 'K01689', 'K01803', 'K00134', 'K00873'}                     | M00002 |
| RSZYD18187345_A_saliva.metaspades.bin.42                     | {'K02108', 'K02115', 'K02110', 'K02113', 'K02109', 'K02112', 'K02111', 'K02114'} | M00157 |
| RSZAXPI002332-57_RAH_dental.metaspades.bin.16                | {'K01834', 'K01689', 'K01803', 'K00134', 'K00873'}                               | M00002 |
| RSZAXPI002332-57_RAH_dental.metaspades.bin.16                | {'K02108', 'K02115', 'K02110', 'K02113', 'K02109', 'K02112', 'K02111', 'K02114'} | M00157 |
| R0170300291_tooth_RAH.megahit.bin.75                         | {'K00927', 'K01689', 'K01803', 'K00134', 'K00873'}                               | M00002 |
| R0170300291_tooth_RAH.megahit.bin.75                         | {'K02108', 'K02115', 'K02110', 'K02113', 'K02109', 'K02112', 'K02111', 'K02114'} | M00157 |
| GCA_027447005.1_ASM2744700v1_genomic                         | {'K15634', 'K00927', 'K01803', 'K00134'}                                         | M00002 |
| GCA_027447005.1_ASM2744700v1_genomic                         | {'K02108', 'K02115', 'K02110', 'K02113', 'K02109', 'K02112', 'K02111', 'K02114'} | M00157 |
| GCA_027447005.1_ASM2744700v1_genomic                         | {'K02298', 'K02300', 'K02297', 'K02299'}                                         | M00417 |
| SZAXPI018452-169_1_RA_saliva.metaspades.bin.16               | {'K01834', 'K00927', 'K01689', 'K01803', 'K00134', 'K00873'}                     | M00002 |
| R0170300199_tooth_RA.megahit.bin.62                          | {'K01834', 'K01689', 'K00873'}                                                   | M00002 |
| R0170300199_tooth_RA.megahit.bin.62                          | {'K02108', 'K02115', 'K02110', 'K02113', 'K02109', 'K02112', 'K02111', 'K02114'} | M00157 |
| R0170300204_tooth_RA.megahit.bin.78                          | {'K15633', 'K00927', 'K01689', 'K01803', 'K00134', 'K00873'}                     | M00002 |
| R0170300204_tooth_RA.megahit.bin.78                          | {'K00625', 'K00925'}                                                             | M00579 |
| GCA_017514145.1_ASM1751414v1_genomic                         | {'K15633', 'K00927', 'K01689', 'K01803', 'K00134', 'K00873'}                     | M00002 |
| GCA_017514145.1_ASM1751414v1_genomic                         | {'K01897'}                                                                       | M00086 |
| GCA_017514145.1_ASM1751414v1_genomic                         | {'K00625', 'K00925'}                                                             | M00579 |
| R0170300161_tooth_RA.megahit.bin.38                          | {'K00927', 'K01689', 'K01803', 'K00134', 'K00873'}                               | M00002 |
| R0170300161_tooth_RA.megahit.bin.38                          | {'K02108', 'K02115', 'K02110', 'K02113', 'K02109', 'K02112', 'K02111', 'K02114'} | M00157 |
| GCA_027459425.1_ASM2745942v1_genomic                         | {'K02108', 'K02115', 'K02110', 'K02113', 'K02109', 'K02112', 'K02111', 'K02114'} | M00157 |
| GCA_027459425.1_ASM2745942v1_genomic                         | {'K02298', 'K02297', 'K02299'}                                                   | M00417 |
| GCA_002335175.1_ASM233517v1_genomic                          | {'K00927', 'K01803', 'K00134', 'K00873'}                                         | M00002 |
| GCA_002335175.1_ASM233517v1_genomic                          | {'K02108', 'K02115', 'K02110', 'K02113', 'K02109', 'K02112', 'K02111', 'K02114'} | M00157 |
| GCA_002335175.1_ASM233517v1_genomic                          | {'K02298', 'K02300', 'K02297', 'K02299'}                                         | M00417 |
| RSZYD18078749_A_saliva.metaspades.bin.35                     | {'K01834', 'K00927', 'K01689', 'K01803', 'K00134', 'K00873'}                     | M00002 |
| SZAXPI018096-17_RA_dental.metaspades.bin.7                   | {'K01834', 'K01689', 'K01803', 'K00134', 'K00873'}                               | M00002 |
| SZAXPI018096-17_RA_dental.metaspades.bin.7                   | {'K02108', 'K02115', 'K02110', 'K02113', 'K02109', 'K02112', 'K02111', 'K02114'} | M00157 |
| SZAXPI018277-90_RA_dental.metaspades.bin.45                  | {'K01834', 'K01689', 'K01803', 'K00134', 'K00873'}                               | M00002 |
| SZAXPI018277-90_RA_dental.metaspades.bin.45                  | {'K02108', 'K02109', 'K02112', 'K02111', 'K02113', 'K02114'}                     | M00157 |
| R0170300276_tooth_RAH.megahit.bin.88                         | {'K01834', 'K00927', 'K01689', 'K01803', 'K00134', 'K00873'}                     | M00002 |
| RSZYD18187722_A_saliva.metaspades.bin.7                      | {'K01834', 'K00927', 'K01689', 'K01803', 'K00134'}                               | M00002 |
| RSZYD18187722_A_saliva.metaspades.bin.7                      | {'K02108', 'K02115', 'K02110', 'K02113', 'K02109', 'K02112', 'K02111', 'K02114'} | M00157 |
| RSZYD18187694_A_saliva.metaspades.bin.6                      | {'K01834', 'K00927', 'K01689', 'K01803', 'K00134', 'K00873'}                     | M00002 |
| RSZYD18187694_A_saliva.metaspades.bin.6                      | {'K02109', 'K02112', 'K02111', 'K02115', 'K02113', 'K02114'}                     | M00157 |
| R0170300079_tooth_RA.megahit.bin.12                          | {'K15633', 'K00927', 'K01689', 'K01803', 'K00134', 'K00873'}                     | M00002 |
| R0170300079_tooth_RA.megahit.bin.12                          | {'K02108', 'K02115', 'K02110', 'K02113', 'K02109', 'K02112', 'K02111', 'K02114'} | M00157 |
| GCA_027427795.1_ASM2742779v1_genomic                         | {'K02108', 'K02115', 'K02110', 'K02113', 'K02109', 'K02112', 'K02111', 'K02114'} | M00157 |
| GCA_027427795.1_ASM2742779v1_genomic                         | {'K02298', 'K02300', 'K02297', 'K02299'}                                         | M00417 |
| R0170300057_tooth_RA.megahit.bin.6                           | {'K01834', 'K01689', 'K01803', 'K00873'}                                         | M00002 |
| R0170300057_tooth_RA.megahit.bin.6                           | {'K02108', 'K02115', 'K02110', 'K02113', 'K02109', 'K02112', 'K02111', 'K02114'} | M00157 |
| GCA_905365345.1_ERZ1645002-mag-bin.1_genomic                 | {'K01834', 'K00927', 'K01689', 'K01803', 'K00134', 'K00873'}                     | M00002 |
| RSZYD18078134_A_saliva.metaspades.bin.52                     | {'K01834', 'K00927', 'K01689', 'K01803', 'K00134', 'K00873'}                     | M00002 |
| RSZYD18078134_A_saliva.metaspades.bin.52                     | {'K02108', 'K02115', 'K02110', 'K02113', 'K02109', 'K02112', 'K02111', 'K02114'} | M00157 |
| RSZYD18187790_A_saliva.metaspades.bin.35                     | {'K01834', 'K00927', 'K01689', 'K01803', 'K00134', 'K00873'}                     | M00002 |



|                                                                |                                                                           |        |
|----------------------------------------------------------------|---------------------------------------------------------------------------|--------|
| RSZYD18187790_A_saliva.metaspades.bin.35                       | {'K02108','K02109','K02112','K02115','K02110','K02113','K02114'}          | M00157 |
| R0170300299_tooth_RAH.megahit.bin.97                           | {'K00927','K01689','K01803','K00134','K00873'}                            | M00002 |
| R0170300299_tooth_RAH.megahit.bin.97                           | {'K02108','K02115','K02110','K02113','K02109','K02112','K02111','K02114'} | M00157 |
| R0170300306_tooth_RAH.megahit.bin.130                          | {'K00927','K01689','K01803','K00134','K00873'}                            | M00002 |
| R0170300306_tooth_RAH.megahit.bin.130                          | {'K02108','K02115','K02110','K02113','K02109','K02112','K02111','K02114'} | M00157 |
| R0170300280_tooth_RAH.megahit.bin.16                           | {'K15633','K00927','K01689','K01803','K00134','K00873'}                   | M00002 |
| R0170300280_tooth_RAH.megahit.bin.16                           | {'K00625','K00925'}                                                       | M00579 |
| SZAXPI018484-16_RA_saliva.metaspades.bin.48                    | {'K01834','K00927','K01689','K01803','K00134','K00873'}                   | M00002 |
| SZAXPI018484-16_RA_saliva.metaspades.bin.48                    | {'K02108','K02109','K02110','K02113'}                                     | M00157 |
| RSZYD18187801_A_saliva.metaspades.bin.75                       | {'K01834','K01689','K01803','K00134','K00873'}                            | M00002 |
| RSZYD18187801_A_saliva.metaspades.bin.75                       | {'K02108','K02109','K02112','K02111','K02115','K02110','K02113'}          | M00157 |
| SZAXPI018101-22_RA_dental.metaspades.bin.26                    | {'K01834','K01689','K01803','K00134','K00873'}                            | M00002 |
| SZAXPI018101-22_RA_dental.metaspades.bin.26                    | {'K02108','K02115','K02110','K02113','K02109','K02112','K02111','K02114'} | M00157 |
| R0170300151_tooth_RA.megahit.bin.21                            | {'K00927','K01689','K01803','K00134','K00873'}                            | M00002 |
| R0170300151_tooth_RA.megahit.bin.21                            | {'K02108','K02115','K02110','K02113','K02109','K02112','K02111','K02114'} | M00157 |
| GCA_017512925.1                                                | {'K15633','K00927','K01689','K01803','K00134','K00873'}                   | M00002 |
| GCA_017512925.1                                                | {'K00625','K00925'}                                                       | M00579 |
| GCA_027366295.1_ASM2736629v1_genomic                           | {'K00927','K01803','K00134','K00873'}                                     | M00002 |
| GCA_027366295.1_ASM2736629v1_genomic                           | {'K02108','K02115','K02110','K02113','K02109','K02112','K02111','K02114'} | M00157 |
| GCA_027366295.1_ASM2736629v1_genomic                           | {'K02298','K02300','K02297','K02299'}                                     | M00417 |
| YS000391_saliva.spades.bin.1                                   | {'K01834','K00927','K01689','K01803','K00134'}                            | M00002 |
| YS000391_saliva.spades.bin.1                                   | {'K02108','K02115','K02110','K02113','K02109','K02112','K02111','K02114'} | M00157 |
| R0170300283_tooth_RAH.megahit.bin.89                           | {'K00927','K01689','K01803','K00134','K00873'}                            | M00002 |
| R0170300283_tooth_RAH.megahit.bin.89                           | {'K02108','K02115','K02110','K02113','K02109','K02112','K02111','K02114'} | M00157 |
| RDPYD18300164_A_saliva.metaspades.bin.23                       | {'K01834','K00927','K01689','K01803','K00134','K00873'}                   | M00002 |
| RDPYD18300164_A_saliva.metaspades.bin.23                       | {'K02108','K02115','K02110','K02113','K02109','K02112','K02111','K02114'} | M00157 |
| GCA_017406595.1                                                | {'K15633','K00927','K01689','K01803','K00134','K00873'}                   | M00002 |
| GCA_017406595.1                                                | {'K01897'}                                                                | M00086 |
| GCA_017406595.1                                                | {'K00625','K00925'}                                                       | M00579 |
| R0170300242_tooth_RAH.megahit.bin.82                           | {'K00927','K01689','K01803','K00134','K00873'}                            | M00002 |
| R0170300242_tooth_RAH.megahit.bin.82                           | {'K02108','K02115','K02110','K02113','K02109','K02112','K02111','K02114'} | M00157 |
| R0170300247_tooth_RAH.megahit.bin.77                           | {'K00927','K01689','K01803','K00134','K00873'}                            | M00002 |
| R0170300247_tooth_RAH.megahit.bin.77                           | {'K02108','K02115','K02110','K02113','K02109','K02112','K02111','K02114'} | M00157 |
| GCA_003516025.1_ASM351602v1_genomic                            | {'K01834','K00927','K01689','K01803','K00134','K00873'}                   | M00002 |
| GCA_003516025.1_ASM351602v1_genomic                            | {'K02108','K02115','K02110','K02113','K02109','K02112','K02111','K02114'} | M00157 |
| GCA_003516025.1_ASM351602v1_genomic                            | {'K02298','K02300','K02297','K02299'}                                     | M00417 |
| GCA_001790455.1_ASM179045v1_genomic                            | {'K02108','K02109','K02112','K02111','K02115','K02113','K02114'}          | M00157 |
| SZAXPI018288-133_RA_dental.metaspades.bin.36                   | {'K00927','K01689','K01803','K00134','K00873'}                            | M00002 |
| SZAXPI018288-133_RA_dental.metaspades.bin.36                   | {'K02108','K02115','K02110','K02113','K02109','K02112','K02111','K02114'} | M00157 |
| GCA_001790445.1_ASM179044v1_genomic                            | {'K00927','K01803','K00134','K00873'}                                     | M00002 |
| GCA_001790445.1_ASM179044v1_genomic                            | {'K02108','K02109','K02112','K02111','K02115','K02113','K02114'}          | M00157 |
| R0170300061_tooth_RA.megahit.bin.44                            | {'K15633','K00927','K01689','K01803','K00134','K00873'}                   | M00002 |
| RSZAXPI002604-26_RA_dental.metaspades.bin.6                    | {'K01834','K00927','K01689','K01803','K00134','K00873'}                   | M00002 |
| YS000025_saliva.spades.bin.20                                  | {'K01834','K00927','K01689','K01803','K00134','K00873'}                   | M00002 |
| YS000025_saliva.spades.bin.20                                  | {'K02108','K02109','K02111','K02115','K02110','K02113'}                   | M00157 |
| RDPYD18088781_A_saliva.metaspades.bin.15                       | {'K02108','K02109','K02110'}                                              | M00157 |
| GCA_027427235.1_ASM2742723v1_genomic                           | {'K00927','K01803','K00134','K00873'}                                     | M00002 |
| GCA_027427235.1_ASM2742723v1_genomic                           | {'K02108','K02115','K02110','K02113','K02109','K02112','K02111','K02114'} | M00157 |
| RSZAXPI002628-79_RA_dental.metaspades.bin.30                   | {'K01834','K01689','K01803','K00134','K00873'}                            | M00002 |
| RSZAXPI002628-79_RA_dental.metaspades.bin.30                   | {'K02108','K02115','K02110','K02113','K02109','K02112','K02111','K02114'} | M00157 |
| R0170300161_tooth_RA.megahit.bin.41                            | {'K15633','K00927','K01689','K01803','K00134','K00873'}                   | M00002 |
| R0170300161_tooth_RA.megahit.bin.41                            | {'K02108','K02115','K02110','K02113','K02109','K02112','K02111','K02114'} | M00157 |
| RSZAXPI002325-39_RAH_dental.metaspades.bin.28                  | {'K01834','K00927','K01689','K01803','K00134','K00873'}                   | M00002 |
| RSZAXPI002325-39_RAH_dental.metaspades.bin.28                  | {'K02108','K02109','K02112','K02111','K02115','K02110','K02114'}          | M00157 |
| GCA_002434045.1_ASM243404v1_genomic                            | {'K00927','K01803','K00134','K00873'}                                     | M00002 |
| GCA_002434045.1_ASM243404v1_genomic                            | {'K02108','K02112','K02111','K02115','K02110','K02113','K02114'}          | M00157 |
| GCA_002434045.1_ASM243404v1_genomic                            | {'K02298','K02300','K02297','K02299'}                                     | M00417 |
| GCA_946482575.1_SRR14536435_bin.26_metawrap_v1.3.0_MAG_genomic | {'K01834','K00927','K15634','K01689','K01803','K00134','K00873'}          | M00002 |
| GCA_946482575.1_SRR14536435_bin.26_metawrap_v1.3.0_MAG_genomic | {'K02108','K02115','K02110','K02113','K02109','K02112','K02111','K02114'} | M00157 |
| GCA_946482575.1_SRR14536435_bin.26_metawrap_v1.3.0_MAG_genomic | {'K02298','K02300','K02297','K02299'}                                     | M00417 |
| GCA_007845325.1_ASM784532v1_genomic                            | {'K02108','K02115','K02110','K02113','K02109','K02112','K02111','K02114'} | M00157 |
| GCA_023253175.1_ASM2325317v1_genomic                           | {'K00927','K15634','K01803','K00134','K00873'}                            | M00002 |
| GCA_023253175.1_ASM2325317v1_genomic                           | {'K02108','K02112','K02111','K02115','K02110','K02114'}                   | M00157 |
| GCA_023253175.1_ASM2325317v1_genomic                           | {'K02298','K02300','K02297','K02299'}                                     | M00417 |
| RDPYD18099034_A_saliva.metaspades.bin.21                       | {'K01834','K00927','K01689','K01803','K00134','K00873'}                   | M00002 |
| RDPYD18099034_A_saliva.metaspades.bin.21                       | {'K02108','K02115','K02110','K02113','K02109','K02112','K02111','K02114'} | M00157 |
| R0170300073_tooth_RA.megahit.bin.46                            | {'K00927','K01689','K01803','K00134','K00873'}                            | M00002 |
| R0170300073_tooth_RA.megahit.bin.46                            | {'K02108','K02115','K02110','K02113','K02109','K02112','K02111','K02114'} | M00157 |
| RSZYD18078790_A_saliva.metaspades.bin.58                       | {'K01834','K00927','K01689','K01803','K00134','K00873'}                   | M00002 |
| RSZYD18078790_A_saliva.metaspades.bin.58                       | {'K02108','K02115','K02110','K02113','K02109','K02112','K02111','K02114'} | M00157 |
| R0170300146_tooth_RA.megahit.bin.30                            | {'K15633','K00927','K01689','K01803','K00134','K00873'}                   | M00002 |
| R0170300146_tooth_RA.megahit.bin.30                            | {'K00625','K00925'}                                                       | M00579 |
| RSZAXPI002655-15_RA_dental.metaspades.bin.1                    | {'K00927','K01689','K01803','K00134','K00873'}                            | M00002 |
| RSZAXPI002655-15_RA_dental.metaspades.bin.1                    | {'K02108','K02115','K02110','K02113','K02109','K02112','K02111','K02114'} | M00157 |
| R0170300060_tooth_RA.megahit.bin.77                            | {'K02108','K02115','K02110','K02113','K02109','K02112','K02111','K02114'} | M00157 |
| R0170300210_tooth_RA.megahit.bin.1                             | {'K00927','K01689','K01803','K00134','K00873'}                            | M00002 |
| R0170300210_tooth_RA.megahit.bin.1                             | {'K02108','K02115','K02110','K02113','K02109','K02112','K02111','K02114'} | M00157 |
| R0170300212_tooth_RA.megahit.bin.57                            | {'K15633','K00927','K01689','K01803','K00134','K00873'}                   | M00002 |
| R0170300212_tooth_RA.megahit.bin.57                            | {'K02108','K02115','K02110','K02113','K02109','K02112','K02111','K02114'} | M00157 |
| RSZYD18078301_A_saliva.metaspades.bin.16                       | {'K01834','K00927','K01689','K01803','K00134','K00873'}                   | M00002 |
| RSZYD18078301_A_saliva.metaspades.bin.16                       | {'K02108','K02115','K02110','K02113','K02109','K02112','K02111','K02114'} | M00157 |
| R0170300298_tooth_RAH.megahit.bin.126                          | {'K00927','K01689','K01803','K00134','K00873'}                            | M00002 |
| R0170300298_tooth_RAH.megahit.bin.126                          | {'K02108','K02115','K02110','K02113','K02109','K02112','K02111','K02114'} | M00157 |
| RSZAXPI002606-27_RA_dental.metaspades.bin.28                   | {'K15633','K00927','K01689','K01803','K00134','K00873'}                   | M00002 |
| RSZAXPI002606-27_RA_dental.metaspades.bin.28                   | {'K00625','K00925'}                                                       | M00579 |
| R0170300100_tooth_RA.megahit.bin.115                           | {'K01834','K00927','K01689','K01803','K00134','K00873'}                   | M00002 |
| R0170300100_tooth_RA.megahit.bin.115                           | {'K02108','K02112','K02111','K02115','K02110','K02114'}                   | M00157 |
| SZAXPI018288-133_RA_dental.metaspades.bin.4                    | {'K02108','K02115','K02110','K02113','K02109','K02112','K02111','K02114'} | M00157 |
| GCA_027427415.1_ASM2742741v1_genomic                           | {'K15634','K00927','K01803','K00134'}                                     | M00002 |
| GCA_027427415.1_ASM2742741v1_genomic                           | {'K02108','K02115','K02110','K02113','K02109','K02112','K02111','K02114'} | M00157 |
| GCA_027427415.1_ASM2742741v1_genomic                           | {'K02298','K02300','K02297','K02299'}                                     | M00417 |
| GCA_943354985.1_Jr-19feb18-57_genomic                          | {'K02112','K02111','K02115','K02113','K02114'}                            | M00157 |
| YS000367_saliva.spades.bin.21                                  | {'K01834','K00927','K01689','K01803','K00134','K00873'}                   | M00002 |
| YS000367_saliva.spades.bin.21                                  | {'K02108','K02115','K02110','K02113','K02109','K02112','K02111','K02114'} | M00157 |
| R0170300178_tooth_RA.megahit.bin.23                            | {'K01834','K00927','K01689','K01803','K00134','K00873'}                   | M00002 |
| GCA_017512085.1                                                | {'K15633','K00927','K01689','K01803','K00134','K00873'}                   | M00002 |
| GCA_017512085.1                                                | {'K01897'}                                                                | M00086 |
| RSZYD18078622_A_saliva.metaspades.bin.17                       | {'K01834','K00927','K01689','K01803','K00134','K00873'}                   | M00002 |
| SZAXPI018171-25_1_RA_dental.metaspades.bin.23                  | {'K00927','K01689','K01803','K00134','K00873'}                            | M00002 |
| SZAXPI018171-25_1_RA_dental.metaspades.bin.23                  | {'K02108','K02115','K02110','K02113','K02109','K02112','K02111','K02114'} | M00157 |
| GCA_002441585.1_ASM244158v1_genomic                            | {'K00927','K01803','K00134','K00873'}                                     | M00002 |
| GCA_002441585.1_ASM244158v1_genomic                            | {'K02108','K02115','K02110','K02113','K02109','K02112','K02111','K02114'} | M00157 |
| GCA_002441585.1_ASM244158v1_genomic                            | {'K02298','K02300','K02297','K02299'}                                     | M00417 |
| RSZYD18187735_A_saliva.metaspades.bin.54                       | {'K01834','K01689','K01803','K00134'}                                     | M00002 |
| RSZYD18187735_A_saliva.metaspades.bin.54                       | {'K02108','K02115','K02110','K02113','K02109','K02112','K02111','K02114'} | M00157 |

|                                                             |                                                                                  |        |
|-------------------------------------------------------------|----------------------------------------------------------------------------------|--------|
| GCA_017480095.1                                             | {'K15633', 'K00927', 'K01689', 'K01803', 'K00134', 'K00873'}                     | M00002 |
| GCA_017480095.1                                             | {'K01897'}                                                                       | M00086 |
| GCA_017480095.1                                             | {'K00625', 'K00925'}                                                             | M00579 |
| RSZAXPI002604-26_RA_dental.metaspades.bin.36                | {'K00927', 'K01689', 'K01803', 'K00134', 'K00873'}                               | M00002 |
| RSZAXPI002604-26_RA_dental.metaspades.bin.36                | {'K02108', 'K02115', 'K02110', 'K02113', 'K02109', 'K02112', 'K02111', 'K02114'} | M00157 |
| YS000259_saliva.spades.bin.23                               | {'K01834', 'K00927', 'K01689', 'K01803', 'K00134', 'K00873'}                     | M00002 |
| YS000259_saliva.spades.bin.23                               | {'K02108', 'K02115', 'K02110', 'K02113', 'K02109', 'K02112', 'K02111', 'K02114'} | M00157 |
| GCA_027450065.1_ASM2745006v1_genomic                        | {'K01834', 'K00927', 'K01803', 'K00134', 'K00873'}                               | M00002 |
| GCA_027450065.1_ASM2745006v1_genomic                        | {'K02108', 'K02115', 'K02110', 'K02113', 'K02109', 'K02112', 'K02111', 'K02114'} | M00157 |
| RDPYD18189916_A_saliva.metaspades.bin.45                    | {'K01834', 'K00927', 'K01689', 'K01803', 'K00134', 'K00873'}                     | M00002 |
| RDPYD18189916_A_saliva.metaspades.bin.45                    | {'K02108', 'K02115', 'K02110', 'K02113', 'K02109', 'K02112', 'K02111', 'K02114'} | M00157 |
| RDPYD18300390_A_saliva.metaspades.bin.50                    | {'K01834', 'K00927', 'K01689', 'K01803', 'K00134', 'K00873'}                     | M00002 |
| RDPYD18300390_A_saliva.metaspades.bin.50                    | {'K02108', 'K02115', 'K02110', 'K02113', 'K02109', 'K02112', 'K02111', 'K02114'} | M00157 |
| RDPYD18097580_A_saliva.metaspades.bin.29                    | {'K01834', 'K00927', 'K01689', 'K01803', 'K00134', 'K00873'}                     | M00002 |
| SZAXPI018277-90_RA_dental.metaspades.bin.77                 | {'K15633', 'K00927', 'K01689', 'K01803', 'K00134', 'K00873'}                     | M00002 |
| SZAXPI018277-90_RA_dental.metaspades.bin.77                 | {'K00625', 'K00925'}                                                             | M00579 |
| GCA_002413755.1_ASM241375v1_genomic                         | {'K01834', 'K00927', 'K01689', 'K01803', 'K00134', 'K00873'}                     | M00002 |
| GCA_002413755.1_ASM241375v1_genomic                         | {'K02108', 'K02115', 'K02110', 'K02113', 'K02109', 'K02112', 'K02111', 'K02114'} | M00157 |
| GCA_002413755.1_ASM241375v1_genomic                         | {'K02298', 'K02300', 'K02299'}                                                   | M00417 |
| SRR6748223.metaspades.bin.14                                | {'K01834', 'K00927', 'K01689', 'K01803', 'K00134', 'K00873'}                     | M00002 |
| SRR6748223.metaspades.bin.14                                | {'K02108', 'K02115', 'K02110', 'K02113', 'K02109', 'K02112', 'K02111', 'K02114'} | M00157 |
| RDPYD18097490_A_saliva.metaspades.bin.7                     | {'K01834', 'K00927', 'K01689', 'K01803', 'K00134', 'K00873'}                     | M00002 |
| R0170300205_tooth_RA.megahit.bin.8                          | {'K15633', 'K00927', 'K01689', 'K01803', 'K00134', 'K00873'}                     | M00002 |
| R0170300205_tooth_RA.megahit.bin.8                          | {'K00625', 'K00925'}                                                             | M00579 |
| R0170300251_tooth_RAH.megahit.bin.83                        | {'K15633', 'K00927', 'K01689', 'K01803', 'K00134', 'K00873'}                     | M00002 |
| R0170300251_tooth_RAH.megahit.bin.83                        | {'K02108', 'K02115', 'K02110', 'K02113', 'K02109', 'K02112', 'K02111', 'K02114'} | M00157 |
| GCA_027365795.1_ASM2736579v1_genomic                        | {'K00927', 'K01803', 'K00134', 'K00873'}                                         | M00002 |
| GCA_027365795.1_ASM2736579v1_genomic                        | {'K02108', 'K02109', 'K02112', 'K02111', 'K02115', 'K02110', 'K02114'}           | M00157 |
| GCA_027365795.1_ASM2736579v1_genomic                        | {'K02298', 'K02300', 'K02297', 'K02299'}                                         | M00417 |
| RSZYD18187216_A_saliva.metaspades.bin.102                   | {'K01834', 'K00927', 'K01689', 'K01803', 'K00134', 'K00873'}                     | M00002 |
| RSZYD18187216_A_saliva.metaspades.bin.102                   | {'K02108', 'K02115', 'K02110', 'K02113', 'K02109', 'K02112', 'K02111', 'K02114'} | M00157 |
| GCA_015257485.1_ASM1525748v1_genomic                        | {'K15633', 'K00927', 'K01689', 'K01803', 'K00134'}                               | M00002 |
| GCA_015257485.1_ASM1525748v1_genomic                        | {'K00625', 'K00925'}                                                             | M00579 |
| GCA_002381545.1_ASM238154v1_genomic                         | {'K00927', 'K01803', 'K00134', 'K00873'}                                         | M00002 |
| GCA_002381545.1_ASM238154v1_genomic                         | {'K02108', 'K02111', 'K02115', 'K02110', 'K02113', 'K02114'}                     | M00157 |
| GCA_947095985.1_SRR8786266_bin.1_metaWRAP_v1.3_MAG_genomic  | {'K01834', 'K00927', 'K01689', 'K01803', 'K00134', 'K00873'}                     | M00002 |
| GCA_947095985.1_SRR8786266_bin.1_metaWRAP_v1.3_MAG_genomic  | {'K02108', 'K02109', 'K02112', 'K02111', 'K02115', 'K02110', 'K02113'}           | M00157 |
| GCA_947253565.1_SRR17635649_bin.4_metaWRAP_v1.3_MAG_genomic | {'K01834', 'K00927', 'K01689', 'K01803', 'K00134', 'K00873'}                     | M00002 |
| GCA_947253565.1_SRR17635649_bin.4_metaWRAP_v1.3_MAG_genomic | {'K01897'}                                                                       | M00086 |
| R0170300321_tooth_RAH.megahit.bin.33                        | {'K01834', 'K01689', 'K01803', 'K00134', 'K00873'}                               | M00002 |
| R0170300321_tooth_RAH.megahit.bin.33                        | {'K02108', 'K02115', 'K02110', 'K02113', 'K02109', 'K02112', 'K02111', 'K02114'} | M00157 |
| RSZYD18078181_A_saliva.metaspades.bin.55                    | {'K01834', 'K00927', 'K01689', 'K01803', 'K00134', 'K00873'}                     | M00002 |
| RSZYD18078161_A_saliva.metaspades.bin.1                     | {'K00927', 'K01689', 'K01803', 'K00134', 'K00873'}                               | M00002 |
| RSZYD18078161_A_saliva.metaspades.bin.1                     | {'K02108', 'K02112', 'K02114'}                                                   | M00157 |
| RDPYD18098896_A_saliva.metaspades.bin.29                    | {'K15633', 'K00927', 'K01689', 'K01803', 'K00134', 'K00873'}                     | M00002 |
| RDPYD18098896_A_saliva.metaspades.bin.29                    | {'K00625', 'K00925'}                                                             | M00579 |
| RDPYD18189907_A_saliva.metaspades.bin.26                    | {'K01834', 'K00927', 'K01689', 'K01803', 'K00134', 'K00873'}                     | M00002 |
| RDPYD18189907_A_saliva.metaspades.bin.26                    | {'K02108', 'K02115', 'K02110', 'K02113', 'K02109', 'K02112', 'K02111', 'K02114'} | M00157 |
| RSZAXPI002318-27_RAH_dental.metaspades.bin.13               | {'K01834', 'K01689', 'K00873'}                                                   | M00002 |
| RSZAXPI002318-27_RAH_dental.metaspades.bin.13               | {'K02108', 'K02115', 'K02110', 'K02113', 'K02109', 'K02112', 'K02111', 'K02114'} | M00157 |
| GCA_002746885.1_ASM274688v1_genomic                         | {'K00927', 'K01689', 'K01803', 'K00134', 'K00873'}                               | M00002 |
| GCA_002746885.1_ASM274688v1_genomic                         | {'K02108', 'K02115', 'K02110', 'K02113', 'K02109', 'K02112', 'K02111', 'K02114'} | M00157 |
| GCA_002699225.1_ASM269922v1_genomic                         | {'K02108', 'K02115', 'K02110', 'K02113', 'K02109', 'K02112', 'K02111', 'K02114'} | M00157 |
| GCA_004100265.1_ASM410026v1_genomic                         | {'K02108', 'K02115', 'K02110', 'K02113', 'K02109', 'K02112', 'K02111', 'K02114'} | M00157 |
| GCA_004100265.1_ASM410026v1_genomic                         | {'K02298', 'K02300', 'K02297', 'K02299'}                                         | M00417 |
| YS000948_saliva.spades.bin.2                                | {'K01834', 'K01689', 'K01803', 'K00134', 'K00873'}                               | M00002 |
| YS000948_saliva.spades.bin.2                                | {'K02108', 'K02115', 'K02110', 'K02113', 'K02109', 'K02112', 'K02111', 'K02114'} | M00157 |
| R0170300148_tooth_RA.megahit.bin.111                        | {'K15633', 'K00927', 'K01689', 'K01803', 'K00134', 'K00873'}                     | M00002 |
| R0170300148_tooth_RA.megahit.bin.111                        | {'K00625', 'K00925'}                                                             | M00579 |
| RSZYD18078115_A_saliva.metaspades.bin.40                    | {'K15633', 'K00927', 'K01689', 'K01803', 'K00134', 'K00873'}                     | M00002 |
| RSZYD18078115_A_saliva.metaspades.bin.40                    | {'K00625', 'K00925'}                                                             | M00579 |
| GCA_009787245.1_ASM978724v1_genomic                         | {'K01834', 'K15633', 'K00927', 'K15634', 'K01689', 'K01803', 'K00134', 'K00873'} | M00002 |
| GCA_009787245.1_ASM978724v1_genomic                         | {'K01897'}                                                                       | M00086 |
| R0170300219_tooth_RA.megahit.bin.2                          | {'K00927', 'K01689', 'K01803', 'K00134', 'K00873'}                               | M00002 |
| R0170300219_tooth_RA.megahit.bin.2                          | {'K02108', 'K02115', 'K02110', 'K02113', 'K02109', 'K02112', 'K02111', 'K02114'} | M00157 |
| RSZAXPI002673-20_RA_dental.metaspades.bin.3                 | {'K02108', 'K02115', 'K02110', 'K02113', 'K02109', 'K02112', 'K02111', 'K02114'} | M00157 |
| GCA_013098855.1_ASM1309885v1_genomic                        | {'K01834', 'K00927', 'K01689', 'K01803', 'K00134', 'K00873'}                     | M00002 |
| GCA_013098855.1_ASM1309885v1_genomic                        | {'K02108', 'K02115', 'K02110', 'K02113', 'K02109', 'K02112', 'K02111', 'K02114'} | M00157 |
| SZAXPI018097-18_RA_dental.metaspades.bin.87                 | {'K01834', 'K00927', 'K01689', 'K01803', 'K00134', 'K00873'}                     | M00002 |
| GCA_905365145.1_ERZ1644999-mag-bin.1_genomic                | {'K01834', 'K01689', 'K01803', 'K00134', 'K00873'}                               | M00002 |
| GCA_905365145.1_ERZ1644999-mag-bin.1_genomic                | {'K02108', 'K02115', 'K02110', 'K02113', 'K02109', 'K02112', 'K02111', 'K02114'} | M00157 |
| RDPYD18189898_A_saliva.metaspades.bin.76                    | {'K01834', 'K00927', 'K01689', 'K01803', 'K00134', 'K00873'}                     | M00002 |
| RDPYD18189898_A_saliva.metaspades.bin.76                    | {'K02108', 'K02115', 'K02110', 'K02113', 'K02109', 'K02112', 'K02111', 'K02114'} | M00157 |
| RDPYD18189905_A_saliva.metaspades.bin.29                    | {'K01834', 'K00927', 'K01689', 'K01803', 'K00134', 'K00873'}                     | M00002 |
| GCA_015655045.1_ASM1565504v1_genomic                        | {'K01834', 'K00927', 'K01689', 'K01803', 'K00134', 'K00873'}                     | M00002 |
| GCA_015655045.1_ASM1565504v1_genomic                        | {'K02108', 'K02115', 'K02110', 'K02113', 'K02109', 'K02112', 'K02111', 'K02114'} | M00157 |
| GCA_015655045.1_ASM1565504v1_genomic                        | {'K02298', 'K02300', 'K02297', 'K02299'}                                         | M00417 |
| GCA_027345405.1_ASM2734540v1_genomic                        | {'K00927', 'K15634', 'K01803', 'K00134', 'K00873'}                               | M00002 |
| GCA_027345405.1_ASM2734540v1_genomic                        | {'K02108', 'K02115', 'K02110', 'K02113', 'K02109', 'K02112', 'K02111', 'K02114'} | M00157 |
| GCA_027345405.1_ASM2734540v1_genomic                        | {'K02298', 'K02300', 'K02297', 'K02299'}                                         | M00417 |
| R0170300092_tooth_RA.megahit.bin.31                         | {'K01834', 'K00927', 'K01689', 'K01803', 'K00134', 'K00873'}                     | M00002 |
| GCA_027366415.1_ASM2736641v1_genomic                        | {'K15634', 'K00927', 'K01803', 'K00134'}                                         | M00002 |
| GCA_027366415.1_ASM2736641v1_genomic                        | {'K01897'}                                                                       | M00086 |
| GCA_027366415.1_ASM2736641v1_genomic                        | {'K02108', 'K02115', 'K02110', 'K02113', 'K02109', 'K02112', 'K02111', 'K02114'} | M00157 |
| GCA_027366415.1_ASM2736641v1_genomic                        | {'K02298', 'K02300', 'K02297', 'K02299'}                                         | M00417 |
| YS000298_saliva.spades.bin.49                               | {'K02108', 'K02109', 'K02110', 'K02115', 'K02112', 'K02113', 'K02114'}           | M00157 |
| R0170300274_tooth_RAH.megahit.bin.17                        | {'K00927', 'K01689', 'K01803', 'K00134', 'K00873'}                               | M00002 |
| R0170300274_tooth_RAH.megahit.bin.17                        | {'K02108', 'K02115', 'K02110', 'K02113', 'K02109', 'K02112', 'K02111', 'K02114'} | M00157 |
| R0170300208_tooth_RA.megahit.bin.73                         | {'K00927', 'K01689', 'K01803', 'K00134', 'K00873'}                               | M00002 |
| R0170300208_tooth_RA.megahit.bin.73                         | {'K02108', 'K02115', 'K02110', 'K02113', 'K02109', 'K02112', 'K02111', 'K02114'} | M00157 |
| GCA_947097435.1_SRR8786267_bin.5_metaWRAP_v1.3_MAG_genomic  | {'K01834', 'K00927', 'K01689', 'K01803', 'K00134', 'K00873'}                     | M00002 |
| GCA_947097435.1_SRR8786267_bin.5_metaWRAP_v1.3_MAG_genomic  | {'K02108', 'K02115', 'K02110', 'K02113', 'K02109', 'K02112', 'K02111', 'K02114'} | M00157 |
| RSZAXPI002321-33_RAH_dental.metaspades.bin.17               | {'K00927', 'K01689', 'K01803', 'K00134', 'K00873'}                               | M00002 |
| RSZAXPI002321-33_RAH_dental.metaspades.bin.17               | {'K02108', 'K02115', 'K02110', 'K02113', 'K02109', 'K02112', 'K02111', 'K02114'} | M00157 |
| GCA_013333055.2_ASM1333305v2_genomic                        | {'K00927', 'K01689', 'K01803', 'K00134', 'K00873'}                               | M00002 |
| GCA_013333055.2_ASM1333305v2_genomic                        | {'K02108', 'K02115', 'K02110', 'K02113', 'K02109', 'K02112', 'K02111', 'K02114'} | M00157 |
| R0170300217_tooth_RA.megahit.bin.11                         | {'K01834', 'K00927', 'K01689', 'K01803', 'K00134', 'K00873'}                     | M00002 |
| RSZYD18187069_A_saliva.metaspades.bin.26                    | {'K01834', 'K00927', 'K01689', 'K01803', 'K00134', 'K00873'}                     | M00002 |
| RSZYD18187069_A_saliva.metaspades.bin.26                    | {'K02108', 'K02115', 'K02110', 'K02113', 'K02109', 'K02112', 'K02111', 'K02114'} | M00157 |
| R0170300305_tooth_RAH.megahit.bin.5                         | {'K01834', 'K00927', 'K01689', 'K01803', 'K00134', 'K00873'}                     | M00002 |
| RSZAXPI002315-24_RAH_dental.metaspades.bin.39               | {'K01834', 'K01689', 'K01803', 'K00134', 'K00873'}                               | M00002 |
| RSZAXPI002315-24_RAH_dental.metaspades.bin.39               | {'K02108', 'K02115', 'K02110', 'K02113', 'K02109', 'K02112', 'K02111', 'K02114'} | M00157 |
| GCA_017509895.1                                             | {'K15633', 'K00927', 'K01689', 'K01803', 'K00134', 'K00873'}                     | M00002 |
| GCA_017509895.1                                             | {'K01897'}                                                                       | M00086 |
| GCA_017509895.1                                             | {'K00925', 'K00625', 'K13788'}                                                   | M00579 |



|                                                              |                                                                                  |        |
|--------------------------------------------------------------|----------------------------------------------------------------------------------|--------|
| R0170300062 tooth RA.megahit.bin.61                          | {'K01834', 'K01689', 'K00873'}                                                   | M00002 |
| R0170300062 tooth RA.megahit.bin.61                          | {'K02108', 'K02115', 'K02110', 'K02113', 'K02109', 'K02112', 'K02111', 'K02114'} | M00157 |
| GCA_000392435.1_ASM39243v1_genomic                           | {'K00927', 'K01803', 'K00134', 'K00873'}                                         | M00002 |
| GCA_000392435.1_ASM39243v1_genomic                           | {'K02108', 'K02115', 'K02110', 'K02113', 'K02109', 'K02112', 'K02111', 'K02114'} | M00157 |
| GCA_946618085.1_SRR873610_bin.1_metaWRAP_v1.3_MAG_genomic    | {'K15633', 'K00927', 'K01689', 'K01803', 'K00134', 'K00873'}                     | M00002 |
| GCA_946618085.1_SRR873610_bin.1_metaWRAP_v1.3_MAG_genomic    | {'K01897'}                                                                       | M00086 |
| GCA_946618085.1_SRR873610_bin.1_metaWRAP_v1.3_MAG_genomic    | {'K00625', 'K00925'}                                                             | M00579 |
| YS000463 saliva.spades.bin.2                                 | {'K01834', 'K00927', 'K01689', 'K01803', 'K00134', 'K00873'}                     | M00002 |
| YS000463 saliva.spades.bin.2                                 | {'K02108', 'K02109', 'K02112', 'K02111', 'K02115', 'K02110', 'K02113'}           | M00157 |
| RDPYD18300150 A saliva.metaspades.bin.6                      | {'K01834', 'K00927', 'K01689', 'K01803', 'K00134', 'K00873'}                     | M00002 |
| RDPYD18300150 A saliva.metaspades.bin.6                      | {'K02108', 'K02115', 'K02110', 'K02113', 'K02109', 'K02112', 'K02111', 'K02114'} | M00157 |
| R0170300146 tooth RA.megahit.bin.21                          | {'K15633', 'K00927', 'K01689', 'K01803', 'K00134', 'K00873'}                     | M00002 |
| R0170300146 tooth RA.megahit.bin.21                          | {'K02108', 'K02115', 'K02110', 'K02113', 'K02109', 'K02112', 'K02111', 'K02114'} | M00157 |
| RDPYD18098768 A saliva.metaspades.bin.59                     | {'K01834', 'K00927', 'K01689', 'K01803', 'K00134', 'K00873'}                     | M00002 |
| YS000246 saliva.spades.bin.34                                | {'K01834', 'K00927', 'K01689', 'K01803', 'K00134', 'K00873'}                     | M00002 |
| YS000246 saliva.spades.bin.34                                | {'K02108', 'K02109', 'K02112', 'K02111', 'K02115', 'K02110', 'K02114'}           | M00157 |
| R0170300071 tooth RA.megahit.bin.81                          | {'K00927', 'K01689', 'K01803', 'K00134', 'K00873'}                               | M00002 |
| SZAXPI018286-123 RA_dental.metaspades.bin.45                 | {'K01834', 'K00927', 'K01689', 'K01803', 'K00134', 'K00873'}                     | M00002 |
| SZAXPI018098-19 RA_dental.metaspades.bin.53                  | {'K02108', 'K02115', 'K02110', 'K02113', 'K02109', 'K02112', 'K02111', 'K02114'} | M00157 |
| SZAXPI018098-19 RA_dental.metaspades.bin.53                  | {'K01834', 'K01689', 'K01803', 'K00134', 'K00873'}                               | M00002 |
| GCA_004138385.1_ASM413838v1_genomic                          | {'K02108', 'K02115', 'K02110', 'K02113', 'K02109', 'K02112', 'K02111', 'K02114'} | M00157 |
| GCA_004138385.1_ASM413838v1_genomic                          | {'K00927', 'K01689', 'K01803', 'K00134', 'K00873'}                               | M00002 |
| R0170300257 tooth RAH.megahit.bin.54                         | {'K02108', 'K02115', 'K02110', 'K02113', 'K02109', 'K02112', 'K02111', 'K02114'} | M00157 |
| R0170300257 tooth RAH.megahit.bin.54                         | {'K01834', 'K00927', 'K01689', 'K01803', 'K00134', 'K00873'}                     | M00002 |
| RDPYD18189907 A saliva.metaspades.bin.2                      | {'K00927', 'K01689', 'K01803', 'K00134', 'K00873'}                               | M00002 |
| R0170300146 tooth RA.megahit.bin.4                           | {'K02108', 'K02115', 'K02110', 'K02113', 'K02109', 'K02112', 'K02111', 'K02114'} | M00157 |
| R0170300146 tooth RA.megahit.bin.4                           | {'K00927', 'K01689', 'K01803', 'K00134', 'K00873'}                               | M00002 |
| R0170300229 tooth RA.megahit.bin.46                          | {'K02108', 'K02115', 'K02110', 'K02113', 'K02109', 'K02112', 'K02111', 'K02114'} | M00157 |
| R0170300229 tooth RA.megahit.bin.46                          | {'K01834', 'K01689', 'K01803', 'K00134', 'K00873'}                               | M00002 |
| R0170300106 tooth RA.megahit.bin.47                          | {'K02108', 'K02115', 'K02110', 'K02113', 'K02109', 'K02112', 'K02111', 'K02114'} | M00157 |
| R0170300106 tooth RA.megahit.bin.47                          | {'K01834', 'K15633', 'K00927', 'K01689', 'K00134', 'K00873'}                     | M00002 |
| GCA_947165465.1_SRR8387716_bin.80_metaWRAP_v1.3_MAG_genomic  | {'K01897'}                                                                       | M00086 |
| GCA_947165465.1_SRR8387716_bin.80_metaWRAP_v1.3_MAG_genomic  | {'K00625', 'K00925'}                                                             | M00579 |
| GCA_947165465.1_SRR8387716_bin.80_metaWRAP_v1.3_MAG_genomic  | {'K15633', 'K00927', 'K01689', 'K01803', 'K00134', 'K00873'}                     | M00002 |
| GCA_017406565.1                                              | {'K01897'}                                                                       | M00086 |
| GCA_017406565.1                                              | {'K00625', 'K00925'}                                                             | M00579 |
| GCA_017510705.1                                              | {'K15633', 'K00927', 'K01689', 'K01803', 'K00134', 'K00873'}                     | M00002 |
| GCA_017510705.1                                              | {'K01897'}                                                                       | M00086 |
| GCA_017510705.1                                              | {'K00925', 'K00625', 'K13788'}                                                   | M00579 |
| RSZYD18078615 A saliva.metaspades.bin.32                     | {'K15633', 'K00927', 'K01689', 'K01803', 'K00134', 'K00873'}                     | M00002 |
| RSZYD18078615 A saliva.metaspades.bin.32                     | {'K00625', 'K00925'}                                                             | M00579 |
| RSZYD18187045 A saliva.metaspades.bin.39                     | {'K01834', 'K00927', 'K01689', 'K01803', 'K00134', 'K00873'}                     | M00002 |
| RSZYD18187503 A saliva.metaspades.bin.53                     | {'K15633', 'K00927', 'K01689', 'K01803', 'K00134', 'K00873'}                     | M00002 |
| RSZYD18187503 A saliva.metaspades.bin.53                     | {'K00625', 'K00925'}                                                             | M00579 |
| GCA_017552385.1_ASM1755238v1_genomic                         | {'K00927', 'K01689', 'K01803', 'K00134', 'K00873'}                               | M00002 |
| GCA_017552385.1_ASM1755238v1_genomic                         | {'K01897'}                                                                       | M00086 |
| GCA_946408595.1_SRR12081297_bin.13_metaWRAP_v1.3_MAG_genomic | {'K15633', 'K00927', 'K01689', 'K01803', 'K00134', 'K00873'}                     | M00002 |
| GCA_946408595.1_SRR12081297_bin.13_metaWRAP_v1.3_MAG_genomic | {'K01897'}                                                                       | M00086 |
| GCA_946408595.1_SRR12081297_bin.13_metaWRAP_v1.3_MAG_genomic | {'K00625', 'K00925'}                                                             | M00579 |
| R0170300233 tooth RA.megahit.bin.80                          | {'K15633', 'K00927', 'K01689', 'K01803', 'K00134', 'K00873'}                     | M00002 |
| R0170300233 tooth RA.megahit.bin.80                          | {'K00625', 'K00925'}                                                             | M00579 |
| RSZYD18078315 A saliva.metaspades.bin.18                     | {'K01834', 'K00927', 'K01803', 'K00134', 'K00873'}                               | M00002 |
| RSZYD18078315 A saliva.metaspades.bin.18                     | {'K02108', 'K02115', 'K02110', 'K02113', 'K02109', 'K02112', 'K02111', 'K02114'} | M00157 |
| GCA_022819385.1_ASM2281938v1_genomic                         | {'K01834', 'K00927', 'K01689', 'K01803', 'K00134', 'K00873'}                     | M00002 |
| GCA_022819385.1_ASM2281938v1_genomic                         | {'K02108', 'K02115', 'K02110', 'K02113', 'K02109', 'K02112', 'K02111', 'K02114'} | M00157 |
| GCA_013099015.1_ASM1309901v1_genomic                         | {'K01834', 'K00927', 'K01689', 'K01803', 'K00134', 'K00873'}                     | M00002 |
| GCA_013099015.1_ASM1309901v1_genomic                         | {'K02108', 'K02109', 'K02112', 'K02111', 'K02115', 'K02110', 'K02114'}           | M00157 |
| RDPYD18300183 A saliva.metaspades.bin.81                     | {'K01834', 'K00927', 'K01689', 'K01803', 'K00134'}                               | M00002 |
| RDPYD18300183 A saliva.metaspades.bin.81                     | {'K00625', 'K00925'}                                                             | M00579 |
| R0170300254 tooth RAH.megahit.bin.73                         | {'K01689', 'K00927', 'K01803', 'K00873'}                                         | M00002 |
| R0170300254 tooth RAH.megahit.bin.73                         | {'K02108', 'K02115', 'K02110', 'K02113', 'K02109', 'K02112', 'K02111', 'K02114'} | M00157 |
| GCA_905372195.1_SRR9217401-mag-bin.1_genomic                 | {'K01834', 'K01689', 'K01803', 'K00134', 'K00873'}                               | M00002 |
| GCA_905372195.1_SRR9217401-mag-bin.1_genomic                 | {'K02108', 'K02115', 'K02110', 'K02113', 'K02109', 'K02112', 'K02111', 'K02114'} | M00157 |
| R0170300309 tooth RAH.megahit.bin.70                         | {'K01834', 'K00927', 'K01689', 'K01803', 'K00134', 'K00873'}                     | M00002 |
| R0170300309 tooth RAH.megahit.bin.70                         | {'K02108', 'K02109', 'K02112', 'K02111', 'K02115', 'K02110', 'K02114'}           | M00157 |
| YS000034 saliva.spades.bin.2                                 | {'K01834', 'K00927', 'K01689', 'K01803', 'K00134', 'K00873'}                     | M00002 |
| YS000034 saliva.spades.bin.2                                 | {'K02108', 'K02115', 'K02110', 'K02113', 'K02109', 'K02112', 'K02111', 'K02114'} | M00157 |
| R0170300145 tooth RA.megahit.bin.69                          | {'K01834', 'K00927', 'K01689', 'K01803', 'K00134', 'K00873'}                     | M00002 |
| R0170300155 tooth RA.megahit.bin.58                          | {'K01834', 'K00927', 'K01689', 'K01803', 'K00134', 'K00873'}                     | M00002 |
| SZAXPI018486-18 RA_saliva.metaspades.bin.17                  | {'K01834', 'K00927', 'K01803', 'K00134', 'K00873'}                               | M00002 |
| SZAXPI018486-18 RA_saliva.metaspades.bin.17                  | {'K02108', 'K02115', 'K02110', 'K02113', 'K02109', 'K02112', 'K02111', 'K02114'} | M00157 |
| RSZYD18078713 A saliva.metaspades.bin.36                     | {'K01834', 'K00927', 'K01689', 'K01803', 'K00134', 'K00873'}                     | M00002 |
| SZAXPI018096-17 RA_dental.metaspades.bin.23                  | {'K01834', 'K01689', 'K00873'}                                                   | M00002 |
| SZAXPI018096-17 RA_dental.metaspades.bin.23                  | {'K02108', 'K02115', 'K02110', 'K02113', 'K02109', 'K02112', 'K02111', 'K02114'} | M00157 |
| RSZYD18078104 A saliva.metaspades.bin.107                    | {'K01834', 'K00927', 'K01689', 'K01803', 'K00134', 'K00873'}                     | M00002 |
| RSZYD18078104 A saliva.metaspades.bin.107                    | {'K02108', 'K02115', 'K02110', 'K02113', 'K02109', 'K02112', 'K02111', 'K02114'} | M00157 |
| RSZYD18078595 A saliva.metaspades.bin.65                     | {'K01834', 'K00927', 'K01689', 'K01803', 'K00134', 'K00873'}                     | M00002 |
| RSZYD18078595 A saliva.metaspades.bin.65                     | {'K02108', 'K02115', 'K02110', 'K02113', 'K02109', 'K02112', 'K02111', 'K02114'} | M00157 |
| SZAXPI018313-15 RA_dental.metaspades.bin.16                  | {'K15633', 'K00927', 'K01689', 'K01803', 'K00134', 'K00873'}                     | M00002 |
| SZAXPI018313-15 RA_dental.metaspades.bin.16                  | {'K02108', 'K02115', 'K02110', 'K02113', 'K02109', 'K02112', 'K02111', 'K02114'} | M00157 |
| RDPYD18098959 A saliva.metaspades.bin.38                     | {'K01834', 'K00927', 'K01689', 'K01803', 'K00134', 'K00873'}                     | M00002 |
| RDPYD18098959 A saliva.metaspades.bin.38                     | {'K02108', 'K02115', 'K02110', 'K02113', 'K02109', 'K02112', 'K02111', 'K02114'} | M00157 |
| SZAXPI018280-95 RA_dental.metaspades.bin.36                  | {'K01834', 'K01689', 'K01803', 'K00134', 'K00873'}                               | M00002 |
| SZAXPI018280-95 RA_dental.metaspades.bin.36                  | {'K02108', 'K02115', 'K02110', 'K02113', 'K02109', 'K02112', 'K02111', 'K02114'} | M00157 |
| RDPYD18201913 A saliva.metaspades.bin.10                     | {'K01834', 'K00927', 'K01689', 'K01803', 'K00134', 'K00873'}                     | M00002 |
| GCA_946405975.1_SRR12081303_bin.106_metaWRAP_v1.3_MAG_genomi | {'K15633', 'K00927', 'K01689', 'K01803', 'K00134', 'K00873'}                     | M00002 |
| GCA_946405975.1_SRR12081303_bin.106_metaWRAP_v1.3_MAG_genomi | {'K01897'}                                                                       | M00086 |
| GCA_946405975.1_SRR12081303_bin.106_metaWRAP_v1.3_MAG_genomi | {'K00625', 'K00925'}                                                             | M00579 |
| RSZYD18187306 A saliva.metaspades.bin.13                     | {'K01834', 'K00927', 'K01689', 'K01803', 'K00134', 'K00873'}                     | M00002 |
| RSZYD18187306 A saliva.metaspades.bin.13                     | {'K02108', 'K02115', 'K02110', 'K02113', 'K02109', 'K02112', 'K02111', 'K02114'} | M00157 |
| RSZYD18078020 A saliva.metaspades.bin.9                      | {'K01834', 'K00927', 'K01689', 'K01803', 'K00134', 'K00873'}                     | M00002 |
| RSZYD18078020 A saliva.metaspades.bin.9                      | {'K02108', 'K02115', 'K02110', 'K02113', 'K02109', 'K02112', 'K02111', 'K02114'} | M00157 |
| RDPYD18189844 A saliva.metaspades.bin.3                      | {'K01834', 'K00927', 'K01689', 'K01803', 'K00134', 'K00873'}                     | M00002 |
| RDPYD18189844 A saliva.metaspades.bin.3                      | {'K02108', 'K02115', 'K02110', 'K02113', 'K02109', 'K02112', 'K02111', 'K02114'} | M00157 |
| GCA_905372495.1_SRR9217423-mag-bin.7_genomic                 | {'K15633', 'K00927', 'K01689', 'K01803', 'K00134', 'K00873'}                     | M00002 |
| GCA_905372495.1_SRR9217423-mag-bin.7_genomic                 | {'K00625', 'K00925'}                                                             | M00579 |
| RSZYD18078773 A saliva.metaspades.bin.71                     | {'K01834', 'K00927', 'K01689', 'K01803', 'K00134', 'K00873'}                     | M00002 |
| RSZYD18078773 A saliva.metaspades.bin.71                     | {'K02108', 'K02115', 'K02110', 'K02113', 'K02109', 'K02112', 'K02111', 'K02114'} | M00157 |
| GCA_002433925.1_ASM243392v1_genomic                          | {'K00927', 'K01803', 'K00134', 'K00873'}                                         | M00002 |
| GCA_002433925.1_ASM243392v1_genomic                          | {'K02108', 'K02115', 'K02110', 'K02113', 'K02109', 'K02112', 'K02111', 'K02114'} | M00157 |
| GCA_002433925.1_ASM243392v1_genomic                          | {'K02298', 'K02300', 'K02297', 'K02299'}                                         | M00417 |
| GCA_027312225.1_ASM2731222v1_genomic                         | {'K00927', 'K01803', 'K00134', 'K00873'}                                         | M00002 |
| GCA_027312225.1_ASM2731222v1_genomic                         | {'K02108', 'K02115', 'K02110', 'K02113', 'K02109', 'K02112', 'K02111', 'K02114'} | M00157 |
| R0170300055 tooth RA.megahit.bin.5                           | {'K01834', 'K01689', 'K00873'}                                                   | M00002 |



|                                                                    |                                                                                  |        |
|--------------------------------------------------------------------|----------------------------------------------------------------------------------|--------|
| R0170300055_tooth_RA.megahit.bin.5                                 | {'K02108', 'K02115', 'K02110', 'K02113', 'K02109', 'K02112', 'K02111', 'K02114'} | M00157 |
| R0170300303_tooth_RAH.megahit.bin.161                              | {'K15633', 'K00927', 'K01689', 'K01803', 'K00134', 'K00873'}                     | M00002 |
| R0170300303_tooth_RAH.megahit.bin.161                              | {'K02108', 'K02115', 'K02110', 'K02113', 'K02109', 'K02112', 'K02111', 'K02114'} | M00157 |
| GCA_002371235.1_ASM237123v1_genomic                                | {'K15633', 'K00927', 'K01689', 'K01803', 'K00134', 'K00873'}                     | M00002 |
| GCA_002371235.1_ASM237123v1_genomic                                | {'K01897'}                                                                       | M00086 |
| RDPYD18300305_A_saliva.metaspades.bin.9                            | {'K01834', 'K00927', 'K01689', 'K01803', 'K00134', 'K00873'}                     | M00002 |
| RDPYD18300305_A_saliva.metaspades.bin.9                            | {'K02108', 'K02115', 'K02110', 'K02113', 'K02109', 'K02112', 'K02111', 'K02114'} | M00157 |
| RDPYD18300101_A_saliva.metaspades.bin.92                           | {'K15633', 'K00927', 'K01689', 'K01803', 'K00134', 'K00873'}                     | M00002 |
| RDPYD18300101_A_saliva.metaspades.bin.92                           | {'K00625', 'K00925'}                                                             | M00579 |
| RDPYD18098912_A_saliva.metaspades.bin.38                           | {'K01834', 'K00927', 'K01689', 'K01803', 'K00134', 'K00873'}                     | M00002 |
| R0170300211_tooth_RA.megahit.bin.13                                | {'K15633', 'K00927', 'K01689', 'K01803', 'K00134', 'K00873'}                     | M00002 |
| R0170300211_tooth_RA.megahit.bin.13                                | {'K00625', 'K00925'}                                                             | M00579 |
| RSZYD18187280_A_saliva.metaspades.bin.37                           | {'K01834', 'K00927', 'K01689', 'K01803', 'K00134', 'K00873'}                     | M00002 |
| RSZYD18187280_A_saliva.metaspades.bin.37                           | {'K02108', 'K02115', 'K02110', 'K02113', 'K02109', 'K02112', 'K02111', 'K02114'} | M00157 |
| R0170300277_tooth_RAH.megahit.bin.4                                | {'K15633', 'K00927', 'K01689', 'K01803', 'K00134', 'K00873'}                     | M00002 |
| R0170300277_tooth_RAH.megahit.bin.4                                | {'K00625', 'K00925'}                                                             | M00579 |
| YS000609_saliva.spades.bin.19                                      | {'K01834', 'K00927', 'K01689', 'K01803', 'K00134', 'K00873'}                     | M00002 |
| YS000609_saliva.spades.bin.19                                      | {'K02108', 'K02109', 'K02111', 'K02115', 'K02110', 'K02113'}                     | M00157 |
| GCA_002793725.1_ASM279372v1_genomic                                | {'K02108', 'K02115', 'K02110', 'K02113', 'K02109', 'K02112', 'K02111', 'K02114'} | M00157 |
| GCA_017406905.1                                                    | {'K15633', 'K00927', 'K01689', 'K01803', 'K00134', 'K00873'}                     | M00002 |
| GCA_017406905.1                                                    | {'K01897'}                                                                       | M00086 |
| R0170300312_tooth_RAH.megahit.bin.31                               | {'K01834', 'K00927', 'K01689', 'K01803', 'K00134', 'K00873'}                     | M00002 |
| RDPYD18189889_A_saliva.metaspades.bin.54                           | {'K01834', 'K00927', 'K01689', 'K01803', 'K00134', 'K00873'}                     | M00002 |
| RDPYD18189889_A_saliva.metaspades.bin.54                           | {'K02108', 'K02109', 'K02111', 'K02115', 'K02110', 'K02113'}                     | M00157 |
| R0170300183_tooth_RA.megahit.bin.5                                 | {'K01834', 'K00927', 'K01689', 'K01803', 'K00134', 'K00873'}                     | M00002 |
| R0170300183_tooth_RA.megahit.bin.5                                 | {'K02108', 'K02115', 'K02110', 'K02113', 'K02109', 'K02112', 'K02111', 'K02114'} | M00157 |
| SZAXPI018278-93_RA_dental.metaspades.bin.39                        | {'K15633', 'K00927', 'K01689', 'K01803', 'K00134', 'K00873'}                     | M00002 |
| SZAXPI018278-93_RA_dental.metaspades.bin.39                        | {'K00625', 'K00925'}                                                             | M00579 |
| RDPYD18300017_A_saliva.metaspades.bin.20                           | {'K01834', 'K00927', 'K01689', 'K01803', 'K00134', 'K00873'}                     | M00002 |
| RDPYD18300017_A_saliva.metaspades.bin.20                           | {'K02108', 'K02115', 'K02110', 'K02113', 'K02109', 'K02112', 'K02111', 'K02114'} | M00157 |
| RSZAXPI002650-142_RA_saliva.metaspades.bin.28                      | {'K01834', 'K01689', 'K00873'}                                                   | M00002 |
| RSZAXPI002650-142_RA_saliva.metaspades.bin.28                      | {'K02108', 'K02115', 'K02110', 'K02113', 'K02109', 'K02112', 'K02111', 'K02114'} | M00157 |
| R0170300119_tooth_RA.megahit.bin.2                                 | {'K15633', 'K00927', 'K01689', 'K01803', 'K00134', 'K00873'}                     | M00002 |
| R0170300119_tooth_RA.megahit.bin.2                                 | {'K02108', 'K02115', 'K02110', 'K02113', 'K02109', 'K02112', 'K02111', 'K02114'} | M00157 |
| RSZAXPI002653-13_RA_saliva.metaspades.bin.41                       | {'K01834', 'K01689', 'K00873'}                                                   | M00002 |
| RSZAXPI002653-13_RA_saliva.metaspades.bin.41                       | {'K02108', 'K02115', 'K02110', 'K02113', 'K02109', 'K02112', 'K02111', 'K02114'} | M00157 |
| RDPYD18189812_A_saliva.metaspades.bin.9                            | {'K01834', 'K00927', 'K01689', 'K01803', 'K00134', 'K00873'}                     | M00002 |
| YS000449_saliva.spades.bin.9                                       | {'K01834', 'K00927', 'K01689', 'K01803', 'K00134', 'K00873'}                     | M00002 |
| YS000449_saliva.spades.bin.9                                       | {'K02108', 'K02115', 'K02110', 'K02113', 'K02109', 'K02112', 'K02111', 'K02114'} | M00157 |
| RDPYD18300152_A_saliva.metaspades.bin.25                           | {'K01834', 'K00927', 'K01689', 'K01803', 'K00134', 'K00873'}                     | M00002 |
| RDPYD18300152_A_saliva.metaspades.bin.25                           | {'K02108', 'K02115', 'K02110', 'K02113', 'K02109', 'K02112', 'K02111', 'K02114'} | M00157 |
| GCA_002381485.1_ASM238148v1_genomic                                | {'K00927', 'K01803', 'K00134', 'K00873'}                                         | M00002 |
| GCA_002381485.1_ASM238148v1_genomic                                | {'K02108', 'K02109', 'K02111', 'K02110', 'K02113', 'K02114'}                     | M00157 |
| GCA_947364625.1_SRR16350215_bin.9_metawrap_v1.3_MAG_genomic        | {'K00927', 'K01689', 'K01803', 'K00134', 'K00873'}                               | M00002 |
| GCA_022841445.1_ASM2284144v1_genomic                               | {'K00927', 'K01803', 'K00134', 'K00873'}                                         | M00002 |
| GCA_022841445.1_ASM2284144v1_genomic                               | {'K02108', 'K02115', 'K02110', 'K02113', 'K02109', 'K02112', 'K02111', 'K02114'} | M00157 |
| RSZYD18078125_A_saliva.metaspades.bin.19                           | {'K01834', 'K00927', 'K01689', 'K01803', 'K00134', 'K00873'}                     | M00002 |
| RSZYD18078125_A_saliva.metaspades.bin.19                           | {'K02108', 'K02115', 'K02110', 'K02113', 'K02109', 'K02112', 'K02111', 'K02114'} | M00157 |
| RDPYD18189875_A_saliva.metaspades.bin.4                            | {'K01834', 'K00927', 'K01689', 'K01803', 'K00134', 'K00873'}                     | M00002 |
| RDPYD18189875_A_saliva.metaspades.bin.4                            | {'K02108', 'K02115', 'K02110', 'K02113', 'K02109', 'K02112', 'K02111', 'K02114'} | M00157 |
| GCA_016789455.1_ASM1678945v1_genomic                               | {'K01834', 'K00927', 'K15634', 'K01689', 'K01803', 'K00134', 'K00873'}           | M00002 |
| GCA_016789455.1_ASM1678945v1_genomic                               | {'K02108', 'K02115', 'K02110', 'K02113', 'K02109', 'K02112', 'K02111', 'K02114'} | M00157 |
| GCA_016789455.1_ASM1678945v1_genomic                               | {'K02298', 'K02300', 'K02297', 'K02299'}                                         | M00417 |
| SZAXPI018488-20_RA_saliva.metaspades.bin.49                        | {'K01834', 'K01689', 'K01803', 'K00134', 'K00873'}                               | M00002 |
| SZAXPI018488-20_RA_saliva.metaspades.bin.49                        | {'K02108', 'K02115', 'K02110', 'K02113', 'K02109', 'K02112', 'K02111', 'K02114'} | M00157 |
| GCA_017431955.1                                                    | {'K15633', 'K00927', 'K01689', 'K01803', 'K00134', 'K00873'}                     | M00002 |
| YS001064_saliva.spades.bin.3                                       | {'K01834', 'K00927', 'K01689', 'K01803', 'K00134', 'K00873'}                     | M00002 |
| YS001064_saliva.spades.bin.3                                       | {'K02108', 'K02109', 'K02110', 'K02113'}                                         | M00157 |
| GCA_916720665.1_SRR15235659_bin.7_metaWRAP_v1.1_MAG_genomic        | {'K01834', 'K00927', 'K01689', 'K01803', 'K00134', 'K00873'}                     | M00002 |
| GCA_916720665.1_SRR15235659_bin.7_metaWRAP_v1.1_MAG_genomic        | {'K02108', 'K02115', 'K02110', 'K02113', 'K02109', 'K02112', 'K02111', 'K02114'} | M00157 |
| SZAXPI018101-22_RA_dental.metaspades.bin.8                         | {'K15633', 'K00927', 'K01689', 'K01803', 'K00134', 'K00873'}                     | M00002 |
| SZAXPI018101-22_RA_dental.metaspades.bin.8                         | {'K02108', 'K02115', 'K02110', 'K02113', 'K02109', 'K02112', 'K02111', 'K02114'} | M00157 |
| RDPYD18098858_A_saliva.metaspades.bin.23                           | {'K01834', 'K01689', 'K01803', 'K00134'}                                         | M00002 |
| RDPYD18098858_A_saliva.metaspades.bin.23                           | {'K02108', 'K02115', 'K02110', 'K02113', 'K02109', 'K02112', 'K02111', 'K02114'} | M00157 |
| GCA_903856615.1_freshwater_MAG_---_AM-lipid-01-D3_bin-1021_genomic | {'K00927', 'K01803', 'K00134', 'K00873'}                                         | M00002 |
| GCA_903856615.1_freshwater_MAG_---_AM-lipid-01-D3_bin-1021_genomic | {'K02108', 'K02109', 'K02112', 'K02111', 'K02115', 'K02110', 'K02114'}           | M00157 |
| GCA_903856615.1_freshwater_MAG_---_AM-lipid-01-D3_bin-1021_genomic | {'K02298', 'K02300', 'K02297', 'K02299'}                                         | M00417 |
| RDPYD18189835_A_saliva.metaspades.bin.31                           | {'K15633', 'K00927', 'K01689', 'K01803', 'K00873'}                               | M00002 |
| RDPYD18189835_A_saliva.metaspades.bin.31                           | {'K00625', 'K00925'}                                                             | M00579 |
| GCA_905372725.1_SRR9217423-mag-bin.8_genomic                       | {'K00927', 'K01689', 'K01803', 'K00134', 'K00873'}                               | M00002 |
| GCA_905372725.1_SRR9217423-mag-bin.8_genomic                       | {'K02108', 'K02115', 'K02110', 'K02113', 'K02109', 'K02112', 'K02111', 'K02114'} | M00157 |
| GCA_017431945.1                                                    | {'K15633', 'K00927', 'K01689', 'K01803', 'K00134', 'K00873'}                     | M00002 |
| GCA_017431945.1                                                    | {'K01897'}                                                                       | M00086 |
| GCA_017431945.1                                                    | {'K00625', 'K00925'}                                                             | M00579 |
| RDPYD18123882_A_tongue.metaspades.bin.29                           | {'K01834', 'K00927', 'K01803', 'K00134'}                                         | M00002 |
| R0170300302_tooth_RAH.megahit.bin.114                              | {'K15633', 'K00927', 'K01689', 'K01803', 'K00134', 'K00873'}                     | M00002 |
| R0170300302_tooth_RAH.megahit.bin.114                              | {'K00625', 'K00925'}                                                             | M00579 |
| RSZYD18187015_A_saliva.metaspades.bin.20                           | {'K01834', 'K00927', 'K01689', 'K01803', 'K00134', 'K00873'}                     | M00002 |
| RSZYD18187015_A_saliva.metaspades.bin.20                           | {'K02108', 'K02109', 'K02111', 'K02115', 'K02110', 'K02113'}                     | M00157 |
| R0170300162_tooth_RA.megahit.bin.89                                | {'K15633', 'K00927', 'K01689', 'K01803', 'K00134', 'K00873'}                     | M00002 |
| R0170300162_tooth_RA.megahit.bin.89                                | {'K00625', 'K00925'}                                                             | M00579 |
| R0170300282_tooth_RAH.megahit.bin.3                                | {'K01834', 'K01689', 'K00873'}                                                   | M00002 |
| R0170300282_tooth_RAH.megahit.bin.3                                | {'K02108', 'K02115', 'K02110', 'K02113', 'K02109', 'K02112', 'K02111', 'K02114'} | M00157 |
| GCA_013333595.2_ASM1333359v2_genomic                               | {'K02108', 'K02115', 'K02110', 'K02113', 'K02109', 'K02112', 'K02111', 'K02114'} | M00157 |
| GCA_027426815.1_ASM2742681v1_genomic                               | {'K02108', 'K02115', 'K02110', 'K02113', 'K02109', 'K02112', 'K02111', 'K02114'} | M00157 |
| GCA_027426815.1_ASM2742681v1_genomic                               | {'K02298', 'K02300', 'K02297', 'K02299'}                                         | M00417 |
| SRR8114071.metaspades.bin.18                                       | {'K01834', 'K00927', 'K01689', 'K01803', 'K00134', 'K00873'}                     | M00002 |
| R0170300105_tooth_RA.megahit.bin.2                                 | {'K15633', 'K00927', 'K01689', 'K01803', 'K00134', 'K00873'}                     | M00002 |
| R0170300105_tooth_RA.megahit.bin.2                                 | {'K00625', 'K00925'}                                                             | M00579 |
| R0170300135_tooth_RA.megahit.bin.76                                | {'K02108', 'K02115', 'K02110', 'K02113', 'K02109', 'K02112', 'K02111', 'K02114'} | M00157 |
| RDPYD18098853_A_saliva.metaspades.bin.65                           | {'K01834', 'K00927', 'K01689', 'K01803', 'K00134', 'K00873'}                     | M00002 |
| RDPYD18098853_A_saliva.metaspades.bin.65                           | {'K02108', 'K02115', 'K02110', 'K02113', 'K02109', 'K02112', 'K02111', 'K02114'} | M00157 |
| R0170300298_tooth_RAH.megahit.bin.8                                | {'K00927', 'K01689', 'K01803', 'K00134', 'K00873'}                               | M00002 |
| R0170300298_tooth_RAH.megahit.bin.8                                | {'K02108', 'K02115', 'K02110', 'K02113', 'K02109', 'K02112', 'K02111', 'K02114'} | M00157 |
| RSZAXPI002637-96_RA_dental.metaspades.bin.23                       | {'K00927', 'K01689', 'K01803', 'K00134', 'K00873'}                               | M00002 |
| RSZAXPI002637-96_RA_dental.metaspades.bin.23                       | {'K02108', 'K02115', 'K02110', 'K02113', 'K02109', 'K02112', 'K02111', 'K02114'} | M00157 |
| RDPYD18189828_A_saliva.metaspades.bin.6                            | {'K01834', 'K00927', 'K01689', 'K01803', 'K00134', 'K00873'}                     | M00002 |
| RDPYD18189828_A_saliva.metaspades.bin.6                            | {'K02108', 'K02115', 'K02110', 'K02113', 'K02109', 'K02112', 'K02111', 'K02114'} | M00157 |
| R0170300289_tooth_RAH.megahit.bin.75                               | {'K01834', 'K00927', 'K01689', 'K01803', 'K00134', 'K00873'}                     | M00002 |
| R0170300289_tooth_RAH.megahit.bin.75                               | {'K02108', 'K02112', 'K02111', 'K02115', 'K02110', 'K02114'}                     | M00157 |
| RSZYD18187596_A_saliva.metaspades.bin.23                           | {'K01834', 'K00927', 'K01689', 'K01803', 'K00134'}                               | M00002 |
| RSZYD18187596_A_saliva.metaspades.bin.23                           | {'K02108', 'K02109', 'K02112', 'K02110', 'K02113', 'K02114'}                     | M00157 |
| GCA_017430725.1                                                    | {'K15633', 'K00927', 'K01689', 'K01803', 'K00134', 'K00873'}                     | M00002 |
| GCA_017430725.1                                                    | {'K01897'}                                                                       | M00086 |
| GCA_017430725.1                                                    | {'K00925', 'K00625', 'K13788'}                                                   | M00579 |

|                                                              |                                                                                  |        |
|--------------------------------------------------------------|----------------------------------------------------------------------------------|--------|
| RDPYD18088800 A saliva.metaspades.bin.38                     | {'K01834', 'K00927', 'K01689', 'K01803', 'K00134', 'K00873'}                     | M00002 |
| RDPYD18088800 A saliva.metaspades.bin.38                     | {'K02108', 'K02115', 'K02110', 'K02113', 'K02109', 'K02112', 'K02111', 'K02114'} | M00157 |
| YS000473 saliva.spades.bin.3                                 | {'K01834', 'K00927', 'K01689', 'K01803', 'K00134', 'K00873'}                     | M00002 |
| YS000473 saliva.spades.bin.3                                 | {'K02108', 'K02109', 'K02110', 'K02113', 'K02114'}                               | M00157 |
| YS000759 saliva.spades.bin.28                                | {'K01834', 'K00927', 'K01689', 'K01803', 'K00134', 'K00873'}                     | M00002 |
| YS000759 saliva.spades.bin.28                                | {'K02108', 'K02115', 'K02110', 'K02113', 'K02109', 'K02112', 'K02111', 'K02114'} | M00157 |
| GCA_002343645.1_ASM234364v1_genomic                          | {'K00927', 'K01803', 'K00134', 'K00873'}                                         | M00002 |
| GCA_002343645.1_ASM234364v1_genomic                          | {'K02108', 'K02109', 'K02112', 'K02111', 'K02115', 'K02110', 'K02114'}           | M00157 |
| GCA_002343645.1_ASM234364v1_genomic                          | {'K02298', 'K02300', 'K02297', 'K02299'}                                         | M00417 |
| GCA_947068245.1_SRR12358625_bin.21_metawrap_v1.3_MAG_genomic | {'K15633', 'K00927', 'K01689', 'K01803', 'K00134', 'K00873'}                     | M00002 |
| GCA_947068245.1_SRR12358625_bin.21_metawrap_v1.3_MAG_genomic | {'K00625', 'K00925'}                                                             | M00579 |
| YS000592 saliva.spades.bin.16                                | {'K01834', 'K00927', 'K01689', 'K01803', 'K00134', 'K00873'}                     | M00002 |
| YS000592 saliva.spades.bin.16                                | {'K02108', 'K02115', 'K02110', 'K02113', 'K02109', 'K02112', 'K02111', 'K02114'} | M00157 |
| RSZAXPI002318-27_RAH_dental.metaspades.bin.2                 | {'K00927', 'K01689', 'K01803', 'K00134', 'K00873'}                               | M00002 |
| RSZAXPI002318-27_RAH_dental.metaspades.bin.2                 | {'K02108', 'K02115', 'K02110', 'K02113', 'K02109', 'K02112', 'K02111', 'K02114'} | M00157 |
| RSZAXPI002469-104_2_RAH_saliva.metaspades.bin.11             | {'K01834', 'K00927', 'K01689', 'K01803', 'K00134', 'K00873'}                     | M00002 |
| RSZAXPI002469-104_2_RAH_saliva.metaspades.bin.11             | {'K02108', 'K02109', 'K02112', 'K02111', 'K02115', 'K02113', 'K02114'}           | M00157 |
| GCA_009783235.1_ASM978323v1_genomic                          | {'K15633', 'K00927', 'K01689', 'K01803', 'K00134', 'K00873'}                     | M00002 |
| GCA_009783235.1_ASM978323v1_genomic                          | {'K01897'}                                                                       | M00086 |
| YS000209 saliva.spades.bin.15                                | {'K01834', 'K00927', 'K01689', 'K01803', 'K00134', 'K00873'}                     | M00002 |
| YS000209 saliva.spades.bin.15                                | {'K02108', 'K02115', 'K02110', 'K02113', 'K02109', 'K02112', 'K02111', 'K02114'} | M00157 |
| YS000527 saliva.spades.bin.34                                | {'K01834', 'K00927', 'K01689', 'K01803', 'K00134', 'K00873'}                     | M00002 |
| YS000527 saliva.spades.bin.34                                | {'K02108', 'K02115', 'K02110', 'K02113', 'K02109', 'K02112', 'K02111', 'K02114'} | M00157 |
| RDPYD18097666 A saliva.metaspades.bin.15                     | {'K01834', 'K00927', 'K01689', 'K01803', 'K00134', 'K00873'}                     | M00002 |
| RDPYD18097666 A saliva.metaspades.bin.15                     | {'K02108', 'K02109', 'K02112', 'K02111', 'K02115', 'K02110', 'K02114'}           | M00157 |
| RSZAXPI002456-79_RAH_dental.metaspades.bin.7                 | {'K15633', 'K00927', 'K01689', 'K01803', 'K00134', 'K00873'}                     | M00002 |
| RSZAXPI002456-79_RAH_dental.metaspades.bin.7                 | {'K00625', 'K00925'}                                                             | M00579 |
| RDPYD18098299 A saliva.metaspades.bin.46                     | {'K01834', 'K00927', 'K01689', 'K01803', 'K00134', 'K00873'}                     | M00002 |
| RDPYD18189957 A saliva.metaspades.bin.89                     | {'K01834', 'K00927', 'K01689', 'K01803', 'K00134', 'K00873'}                     | M00002 |
| RDPYD18189957 A saliva.metaspades.bin.89                     | {'K02108', 'K02115', 'K02110', 'K02113', 'K02109', 'K02112', 'K02111', 'K02114'} | M00157 |
| SZAXPI018313-15_RA_dental.metaspades.bin.43                  | {'K01834', 'K00927', 'K01689', 'K01803', 'K00873'}                               | M00002 |
| GCA_004151455.1_ASM415145v1_genomic                          | {'K01834', 'K00927', 'K01689', 'K01803', 'K00134', 'K00873'}                     | M00002 |
| GCA_027427595.1_ASM2742759v1_genomic                         | {'K00927', 'K01803', 'K00134', 'K00873'}                                         | M00002 |
| GCA_027427595.1_ASM2742759v1_genomic                         | {'K02108', 'K02115', 'K02110', 'K02113', 'K02109', 'K02112', 'K02111', 'K02114'} | M00157 |
| GCA_013816445.1_ASM1381644v1_genomic                         | {'K00927', 'K01803', 'K00134', 'K00873'}                                         | M00002 |
| GCA_013816445.1_ASM1381644v1_genomic                         | {'K02112', 'K02111', 'K02115', 'K02114'}                                         | M00157 |
| RSZYD18187210 A saliva.metaspades.bin.21                     | {'K01834', 'K00927', 'K01689', 'K01803', 'K00134', 'K00873'}                     | M00002 |
| RSZYD18187210 A saliva.metaspades.bin.21                     | {'K02108', 'K02109', 'K02111', 'K02115', 'K02110', 'K02113'}                     | M00157 |
| RSZYD18078461 A saliva.metaspades.bin.53                     | {'K02108', 'K02115', 'K02110', 'K02113', 'K02109', 'K02112', 'K02111', 'K02114'} | M00157 |
| GCA_003508055.1_ASM350805v1_genomic                          | {'K00927', 'K01803', 'K00134', 'K00873'}                                         | M00002 |
| GCA_003508055.1_ASM350805v1_genomic                          | {'K02108', 'K02115', 'K02110', 'K02113', 'K02109', 'K02112', 'K02111', 'K02114'} | M00157 |
| R0170300098_tooth_RA.megahit.bin.34                          | {'K15633', 'K00927', 'K01689', 'K01803', 'K00134', 'K00873'}                     | M00002 |
| R0170300098_tooth_RA.megahit.bin.34                          | {'K02108', 'K02115', 'K02110', 'K02113', 'K02109', 'K02112', 'K02111', 'K02114'} | M00157 |
| GCA_017545505.1_ASM1754550v1_genomic                         | {'K15633', 'K00927', 'K01689', 'K01803', 'K00134', 'K00873'}                     | M00002 |
| GCA_017545505.1_ASM1754550v1_genomic                         | {'K01897'}                                                                       | M00086 |
| GCA_017545505.1_ASM1754550v1_genomic                         | {'K00625', 'K00925'}                                                             | M00579 |
| R0170300258_tooth_RA.megahit.bin.73                          | {'K15633', 'K00927', 'K01689', 'K01803', 'K00134', 'K00873'}                     | M00002 |
| R0170300258_tooth_RA.megahit.bin.73                          | {'K02108', 'K02115', 'K02110', 'K02113', 'K02109', 'K02112', 'K02111', 'K02114'} | M00157 |
| RDPYD18201945 A saliva.metaspades.bin.17                     | {'K01834', 'K00927', 'K01689', 'K01803', 'K00134', 'K00873'}                     | M00002 |
| GCA_947171955.1_SRR14862904_bin.27_metawrap_v1.3_MAG_genomic | {'K15633', 'K00927', 'K01689', 'K01803', 'K00134', 'K00873'}                     | M00002 |
| RDPYD18088830 A saliva.metaspades.bin.38                     | {'K01834', 'K00927', 'K01689', 'K01803', 'K00134', 'K00873'}                     | M00002 |
| RDPYD18088830 A saliva.metaspades.bin.38                     | {'K02108', 'K02115', 'K02110', 'K02113', 'K02109', 'K02112', 'K02111', 'K02114'} | M00157 |
| R0170300127_tooth_RA.megahit.bin.30                          | {'K01834', 'K00927', 'K01689', 'K01803', 'K00134', 'K00873'}                     | M00002 |
| R0170300127_tooth_RA.megahit.bin.30                          | {'K02108', 'K02109', 'K02112', 'K02111', 'K02115', 'K02110', 'K02114'}           | M00157 |
| RSZAXPI002657-17_RA_dental.metaspades.bin.27                 | {'K01834', 'K01689', 'K01803', 'K00134', 'K00873'}                               | M00002 |
| RSZAXPI002657-17_RA_dental.metaspades.bin.27                 | {'K02108', 'K02115', 'K02110', 'K02113', 'K02109', 'K02112', 'K02111', 'K02114'} | M00157 |
| SZAXPI018323-25_RA_dental.metaspades.bin.7                   | {'K01834', 'K00927', 'K01689', 'K01803', 'K00134', 'K00873'}                     | M00002 |
| SZAXPI018323-25_RA_dental.metaspades.bin.7                   | {'K02108', 'K02115', 'K02110', 'K02113', 'K02109', 'K02112', 'K02111', 'K02114'} | M00157 |
| SZAXPI018323-25_RA_dental.metaspades.bin.51                  | {'K00927', 'K01689', 'K01803', 'K00134', 'K00873'}                               | M00002 |
| SZAXPI018323-25_RA_dental.metaspades.bin.51                  | {'K02108', 'K02115', 'K02110', 'K02113', 'K02109', 'K02112', 'K02111', 'K02114'} | M00157 |
| RSZAXPI002612-20_RA_dental.metaspades.bin.34                 | {'K01834', 'K01689', 'K01803', 'K00134', 'K00873'}                               | M00002 |
| RSZAXPI002612-20_RA_dental.metaspades.bin.34                 | {'K02108', 'K02115', 'K02110', 'K02113', 'K02109', 'K02112', 'K02111', 'K02114'} | M00157 |
| R0170300120_tooth_RA.megahit.bin.47                          | {'K01834', 'K00927', 'K01689', 'K01803', 'K00134', 'K00873'}                     | M00002 |
| R0170300120_tooth_RA.megahit.bin.47                          | {'K02108', 'K02115', 'K02110', 'K02113', 'K02109', 'K02112', 'K02111', 'K02114'} | M00157 |
| GCA_027427875.1_ASM2742787v1_genomic                         | {'K02108', 'K02115', 'K02110', 'K02113', 'K02109', 'K02112', 'K02111', 'K02114'} | M00157 |
| GCA_027427875.1_ASM2742787v1_genomic                         | {'K02298', 'K02300', 'K02297', 'K02299'}                                         | M00417 |
| RSZAXPI002456-79_RAH_dental.metaspades.bin.34                | {'K01834', 'K00927', 'K01689', 'K01803', 'K00134', 'K00873'}                     | M00002 |
| SZAXPI018320-22_RA_dental.metaspades.bin.9                   | {'K01834', 'K00927', 'K01689', 'K01803', 'K00134', 'K00873'}                     | M00002 |
| SZAXPI018092-13_RA_dental.metaspades.bin.61                  | {'K01834', 'K00927', 'K01689', 'K01803', 'K00134', 'K00873'}                     | M00002 |
| SZAXPI018092-13_RA_dental.metaspades.bin.61                  | {'K02108', 'K02112', 'K02111', 'K02115', 'K02110', 'K02114'}                     | M00157 |
| R0170300178_tooth_RA.megahit.bin.102                         | {'K15633', 'K00927', 'K01689', 'K01803', 'K00134', 'K00873'}                     | M00002 |
| R0170300178_tooth_RA.megahit.bin.102                         | {'K00625', 'K00925'}                                                             | M00579 |
| GCA_905371595.1_SRR9217384-mag-bin.1_genomic                 | {'K01834', 'K01689', 'K01803', 'K00873'}                                         | M00002 |
| GCA_905371595.1_SRR9217384-mag-bin.1_genomic                 | {'K02108', 'K02115', 'K02110', 'K02113', 'K02109', 'K02112', 'K02111', 'K02114'} | M00157 |
| RDPYD18201655 A saliva.metaspades.bin.21                     | {'K15633', 'K00927', 'K01689', 'K01803', 'K00134', 'K00873'}                     | M00002 |
| RDPYD18201655 A saliva.metaspades.bin.21                     | {'K00625', 'K00925'}                                                             | M00579 |
| GCA_002441145.1_ASM244114v1_genomic                          | {'K00927', 'K01803', 'K00134', 'K00873'}                                         | M00002 |
| GCA_002441145.1_ASM244114v1_genomic                          | {'K02108', 'K02109', 'K02112', 'K02111', 'K02115', 'K02113', 'K02114'}           | M00157 |
| RSZAXPI002479-169_2_RAH_saliva.metaspades.bin.78             | {'K15633', 'K00927', 'K01689', 'K01803', 'K00134', 'K00873'}                     | M00002 |
| RSZAXPI002479-169_2_RAH_saliva.metaspades.bin.78             | {'K00625', 'K00925'}                                                             | M00579 |
| R0170300272_tooth_RA.megahit.bin.68                          | {'K15633', 'K00927', 'K01689', 'K01803', 'K00134', 'K00873'}                     | M00002 |
| R0170300272_tooth_RA.megahit.bin.68                          | {'K00625', 'K00925'}                                                             | M00579 |
| GCA_003164595.1_20120700_S1D_genomic                         | {'K01897'}                                                                       | M00086 |
| GCA_003164595.1_20120700_S1D_genomic                         | {'K02108', 'K02109', 'K02112', 'K02111', 'K02115', 'K02110', 'K02114'}           | M00157 |
| GCA_003164595.1_20120700_S1D_genomic                         | {'K02298', 'K02300', 'K02297', 'K02299'}                                         | M00417 |
| R0170300110_tooth_RA.megahit.bin.38                          | {'K01834', 'K01689', 'K01803', 'K00873'}                                         | M00002 |
| GCA_002309075.1_ASM230907v1_genomic                          | {'K15633', 'K00927', 'K01689', 'K01803', 'K00134', 'K00873'}                     | M00002 |
| GCA_002309075.1_ASM230907v1_genomic                          | {'K01897'}                                                                       | M00086 |
| GCA_002309075.1_ASM230907v1_genomic                          | {'K00625', 'K00925'}                                                             | M00579 |
| GCA_017421685.1                                              | {'K15633', 'K00927', 'K01689', 'K01803', 'K00134', 'K00873'}                     | M00002 |
| GCA_017421685.1                                              | {'K01897'}                                                                       | M00086 |
| GCA_017421685.1                                              | {'K00925', 'K00625', 'K13788'}                                                   | M00579 |
| SZAXPI018103-24_RA_dental.metaspades.bin.52                  | {'K00927', 'K01689', 'K01803', 'K00134', 'K00873'}                               | M00002 |
| SZAXPI018103-24_RA_dental.metaspades.bin.52                  | {'K02108', 'K02115', 'K02110', 'K02113', 'K02109', 'K02112', 'K02111', 'K02114'} | M00157 |
| YS000282 saliva.spades.bin.24                                | {'K01834', 'K00927', 'K01689', 'K01803', 'K00873'}                               | M00002 |
| YS000282 saliva.spades.bin.24                                | {'K02108', 'K02115', 'K02110', 'K02113', 'K02109', 'K02112', 'K02111', 'K02114'} | M00157 |
| R0170300164_tooth_RA.megahit.bin.80                          | {'K15633', 'K00927', 'K01689', 'K01803', 'K00134', 'K00873'}                     | M00002 |
| R0170300164_tooth_RA.megahit.bin.80                          | {'K00625', 'K00925'}                                                             | M00579 |
| YS000883 saliva.spades.bin.12                                | {'K01834', 'K00927', 'K01689', 'K01803', 'K00134', 'K00873'}                     | M00002 |
| YS000883 saliva.spades.bin.12                                | {'K02108', 'K02115', 'K02110', 'K02113', 'K02109', 'K02112', 'K02111', 'K02114'} | M00157 |
| SZAXPI018357-22_RA_saliva.metaspades.bin.38                  | {'K01834', 'K00927', 'K01689', 'K01803', 'K00134', 'K00873'}                     | M00002 |
| GCA_947306055.1_SRR10912535_bin.62_metaWRAP_v1.3_MAG_genomic | {'K15633', 'K00927', 'K01689', 'K01803', 'K00134', 'K00873'}                     | M00002 |
| GCA_947306055.1_SRR10912535_bin.62_metaWRAP_v1.3_MAG_genomic | {'K00625', 'K00925'}                                                             | M00579 |
| RDPYD18201735 A saliva.metaspades.bin.32                     | {'K01834', 'K00927', 'K01689', 'K01803', 'K00134', 'K00873'}                     | M00002 |
| RSZYD18078234 A saliva.metaspades.bin.10                     | {'K01834', 'K00927', 'K01689', 'K01803', 'K00134', 'K00873'}                     | M00002 |



|                                                               |                                                                                  |        |
|---------------------------------------------------------------|----------------------------------------------------------------------------------|--------|
| GCA_020428435.1_ASM2042843v1_genomic                          | {'K15634', 'K00927', 'K01803', 'K00873'}                                         | M00002 |
| GCA_020428435.1_ASM2042843v1_genomic                          | {'K02108', 'K02112', 'K02111', 'K02115', 'K02113', 'K02114'}                     | M00157 |
| R0170300205_tooth_RA.megahit.bin.38                           | {'K01834', 'K00927', 'K01689', 'K01803', 'K00134', 'K00873'}                     | M00002 |
| GCA_017651125.1_ASM1765112v1_genomic                          | {'K15633', 'K00927', 'K01689', 'K00134', 'K00873'}                               | M00002 |
| GCA_017651125.1_ASM1765112v1_genomic                          | {'K01897'}                                                                       | M00086 |
| GCA_017651125.1_ASM1765112v1_genomic                          | {'K00625', 'K00925'}                                                             | M00579 |
| GCA_001788565.1_ASM178856v1_genomic                           | {'K02108', 'K02115', 'K02110', 'K02113', 'K02109', 'K02112', 'K02111', 'K02114'} | M00157 |
| GCA_001788565.1_ASM178856v1_genomic                           | {'K02297'}                                                                       | M00417 |
| SRR8114056.metaspades.bin.5                                   | {'K15633', 'K00927', 'K01689', 'K01803', 'K00134', 'K00873'}                     | M00002 |
| SRR8114056.metaspades.bin.5                                   | {'K00625', 'K00925'}                                                             | M00579 |
| GCA_017404845.1                                               | {'K15633', 'K00927', 'K01689', 'K01803', 'K00134', 'K00873'}                     | M00002 |
| YS000541_saliva.spades.bin.2                                  | {'K00927', 'K01689', 'K01803', 'K00134', 'K00873'}                               | M00002 |
| YS000541_saliva.spades.bin.2                                  | {'K02108', 'K02115', 'K02110', 'K02113', 'K02109', 'K02112', 'K02111', 'K02114'} | M00157 |
| RSZAXPI002310-19_RAH_dental.metaspades.bin.24                 | {'K01834', 'K00927', 'K01689', 'K01803', 'K00134', 'K00873'}                     | M00002 |
| R0170300083_tooth_RA.megahit.bin.110                          | {'K01834', 'K00927', 'K01689', 'K01803', 'K00134', 'K00873'}                     | M00002 |
| RDPYD18300020_A_saliva.metaspades.bin.20                      | {'K01834', 'K00927', 'K01689', 'K01803', 'K00134', 'K00873'}                     | M00002 |
| GCA_027427695.1_ASM2742769v1_genomic                          | {'K00927', 'K01803', 'K00134', 'K00873'}                                         | M00002 |
| GCA_027427695.1_ASM2742769v1_genomic                          | {'K02108', 'K02115', 'K02110', 'K02113', 'K02109', 'K02112', 'K02111', 'K02114'} | M00157 |
| SZAXPI018103-24_RA_dental.metaspades.bin.59                   | {'K15633', 'K00927', 'K01689', 'K01803', 'K00134', 'K00873'}                     | M00002 |
| SZAXPI018103-24_RA_dental.metaspades.bin.59                   | {'K02108', 'K02115', 'K02110', 'K02113', 'K02109', 'K02112', 'K02111', 'K02114'} | M00157 |
| GCA_013332955.2_ASM1333295v2_genomic                          | {'K15633', 'K00927', 'K01689', 'K01803', 'K00134', 'K00873'}                     | M00002 |
| GCA_013332955.2_ASM1333295v2_genomic                          | {'K00625', 'K00925'}                                                             | M00579 |
| R0170300292_tooth_RAH.megahit.bin.27                          | {'K01834', 'K15633', 'K00927', 'K01689', 'K01803', 'K00134', 'K00873'}           | M00002 |
| R0170300292_tooth_RAH.megahit.bin.27                          | {'K02108', 'K02115', 'K02110', 'K02113', 'K02109', 'K02112', 'K02111', 'K02114'} | M00157 |
| GCA_027426655.1_ASM2742665v1_genomic                          | {'K15634', 'K00927', 'K01803', 'K00134'}                                         | M00002 |
| GCA_027426655.1_ASM2742665v1_genomic                          | {'K02108', 'K02115', 'K02110', 'K02113', 'K02109', 'K02112', 'K02111', 'K02114'} | M00157 |
| R0170300102_tooth_RA.megahit.bin.20                           | {'K01834', 'K01689', 'K01803', 'K00134', 'K00873'}                               | M00002 |
| R0170300102_tooth_RA.megahit.bin.20                           | {'K02108', 'K02115', 'K02110', 'K02113', 'K02109', 'K02112', 'K02111', 'K02114'} | M00157 |
| GCA_027427295.1_ASM2742729v1_genomic                          | {'K15634', 'K00927', 'K01803', 'K00134'}                                         | M00002 |
| GCA_027427295.1_ASM2742729v1_genomic                          | {'K02108', 'K02115', 'K02110', 'K02113', 'K02109', 'K02112', 'K02111', 'K02114'} | M00157 |
| GCA_027427295.1_ASM2742729v1_genomic                          | {'K02298', 'K02300', 'K02297', 'K02299'}                                         | M00417 |
| SZAXPI018400-40_RA_saliva.metaspades.bin.35                   | {'K01834', 'K00927', 'K01689', 'K01803', 'K00134', 'K00873'}                     | M00002 |
| SZAXPI018400-40_RA_saliva.metaspades.bin.35                   | {'K02108', 'K02115', 'K02110', 'K02113', 'K02109', 'K02112', 'K02111', 'K02114'} | M00157 |
| GCA_947367795.1_SRR15431173_bin.17_metawrap_v1.3_MAG_genomic  | {'K15633', 'K00927', 'K01689', 'K01803', 'K00134', 'K00873'}                     | M00002 |
| GCA_947367795.1_SRR15431173_bin.17_metawrap_v1.3_MAG_genomic  | {'K00625', 'K00925'}                                                             | M00579 |
| RSZYD18078604_A_saliva.metaspades.bin.57                      | {'K01834', 'K00927', 'K01689', 'K01803', 'K00134', 'K00873'}                     | M00002 |
| RSZYD18078604_A_saliva.metaspades.bin.57                      | {'K02108', 'K02115', 'K02110', 'K02113', 'K02109', 'K02112', 'K02111', 'K02114'} | M00157 |
| GCA_026395435.1_ASM2639543v1_genomic                          | {'K00927', 'K15634', 'K01803', 'K00134', 'K00873'}                               | M00002 |
| GCA_026395435.1_ASM2639543v1_genomic                          | {'K02108', 'K02109', 'K02112', 'K02111', 'K02115', 'K02110', 'K02114'}           | M00157 |
| RSZAXPI002657-17_RA_dental.metaspades.bin.13                  | {'K15633', 'K00927', 'K01689', 'K01803', 'K00134', 'K00873'}                     | M00002 |
| RSZAXPI002657-17_RA_dental.metaspades.bin.13                  | {'K02108', 'K02115', 'K02110', 'K02113', 'K02109', 'K02112', 'K02111', 'K02114'} | M00157 |
| SZAXPI018317-19_RA_dental.metaspades.bin.70                   | {'K15633', 'K00927', 'K01689', 'K01803', 'K00134', 'K00873'}                     | M00002 |
| SZAXPI018317-19_RA_dental.metaspades.bin.70                   | {'K02108', 'K02115', 'K02110', 'K02113', 'K02109', 'K02112', 'K02111', 'K02114'} | M00157 |
| R0170300350_saliva_RA.megahit.bin.87                          | {'K01834', 'K00927', 'K01689', 'K01803', 'K00134', 'K00873'}                     | M00002 |
| RDPYD18189965_A_saliva.metaspades.bin.61                      | {'K01834', 'K00927', 'K01689', 'K01803', 'K00134', 'K00873'}                     | M00002 |
| GCA_002363125.1_ASM236312v1_genomic                           | {'K15633', 'K00927', 'K01689', 'K01803', 'K00134', 'K00873'}                     | M00002 |
| GCA_002363125.1_ASM236312v1_genomic                           | {'K01897'}                                                                       | M00086 |
| GCA_002363125.1_ASM236312v1_genomic                           | {'K00625', 'K00925'}                                                             | M00579 |
| RDPYD18088981_A_saliva.metaspades.bin.41                      | {'K01834', 'K00927', 'K01689', 'K01803', 'K00134', 'K00873'}                     | M00002 |
| RDPYD18088981_A_saliva.metaspades.bin.41                      | {'K02108', 'K02115', 'K02110', 'K02113', 'K02109', 'K02112', 'K02111', 'K02114'} | M00157 |
| YS001127_saliva.spades.bin.3                                  | {'K01834', 'K00927', 'K01689', 'K01803', 'K00134', 'K00873'}                     | M00002 |
| YS001127_saliva.spades.bin.3                                  | {'K02108', 'K02115', 'K02110', 'K02113', 'K02109', 'K02112', 'K02111', 'K02114'} | M00157 |
| GCA_007845265.1_ASM784526v1_genomic                           | {'K01834', 'K00927', 'K01689', 'K01803', 'K00134', 'K00873'}                     | M00002 |
| GCA_007845265.1_ASM784526v1_genomic                           | {'K02108', 'K02115', 'K02110', 'K02113', 'K02109', 'K02112', 'K02111', 'K02114'} | M00157 |
| GCA_027365555.1_ASM2736555v1_genomic                          | {'K02108', 'K02115', 'K02110', 'K02113', 'K02109', 'K02112', 'K02111', 'K02114'} | M00157 |
| GCA_027365555.1_ASM2736555v1_genomic                          | {'K02298', 'K02300', 'K02297', 'K02299'}                                         | M00417 |
| R0170300251_tooth_RAH.megahit.bin.31                          | {'K00927', 'K01689', 'K01803', 'K00134', 'K00873'}                               | M00002 |
| R0170300251_tooth_RAH.megahit.bin.31                          | {'K02108', 'K02115', 'K02110', 'K02113', 'K02109', 'K02112', 'K02111', 'K02114'} | M00157 |
| R0170300303_tooth_RAH.megahit.bin.144                         | {'K00927', 'K01689', 'K01803', 'K00134', 'K00873'}                               | M00002 |
| R0170300303_tooth_RAH.megahit.bin.144                         | {'K02108', 'K02115', 'K02110', 'K02113', 'K02109', 'K02112', 'K02111', 'K02114'} | M00157 |
| RSZAXPI002312-21_RAH_dental.metaspades.bin.60                 | {'K00927', 'K01689', 'K01803', 'K00134', 'K00873'}                               | M00002 |
| RSZAXPI002312-21_RAH_dental.metaspades.bin.60                 | {'K02108', 'K02115', 'K02110', 'K02113', 'K02109', 'K02112', 'K02111', 'K02114'} | M00157 |
| YS000402_saliva.spades.bin.13                                 | {'K01834', 'K00927', 'K01803', 'K00134', 'K00873'}                               | M00002 |
| YS000402_saliva.spades.bin.13                                 | {'K02108', 'K02115', 'K02110', 'K02113', 'K02109', 'K02112', 'K02111', 'K02114'} | M00157 |
| GCA_009781895.1_ASM978189v1_genomic                           | {'K15633', 'K00927', 'K01689', 'K01803', 'K00134', 'K00873'}                     | M00002 |
| GCA_009781895.1_ASM978189v1_genomic                           | {'K00625', 'K00925'}                                                             | M00579 |
| RSZYD18078738_A_saliva.metaspades.bin.63                      | {'K01834', 'K00927', 'K01689', 'K01803', 'K00134', 'K00873'}                     | M00002 |
| RSZYD18078738_A_saliva.metaspades.bin.63                      | {'K02108', 'K02115', 'K02110', 'K02113', 'K02109', 'K02112', 'K02111', 'K02114'} | M00157 |
| GCA_947425245.1_SRR19981124_bin.25_metawrap_v1.3_MAG_genomic  | {'K15633', 'K00927', 'K01689', 'K01803', 'K00134', 'K00873'}                     | M00002 |
| GCA_947425245.1_SRR19981124_bin.25_metawrap_v1.3_MAG_genomic  | {'K00625', 'K00925'}                                                             | M00579 |
| R0170300208_tooth_RA.megahit.bin.25                           | {'K01834', 'K01689', 'K01803', 'K00134', 'K00873'}                               | M00002 |
| RDPYD18189988_A_saliva.metaspades.bin.51                      | {'K01834', 'K00927', 'K01689', 'K01803', 'K00134', 'K00873'}                     | M00002 |
| RDPYD18189988_A_saliva.metaspades.bin.51                      | {'K02108', 'K02115', 'K02110', 'K02113', 'K02109', 'K02112', 'K02111', 'K02114'} | M00157 |
| YS000433_saliva.spades.bin.7                                  | {'K01834', 'K00927', 'K01689', 'K01803', 'K00134', 'K00873'}                     | M00002 |
| YS000433_saliva.spades.bin.7                                  | {'K02108', 'K02115', 'K02110', 'K02113', 'K02109', 'K02112', 'K02111', 'K02114'} | M00157 |
| GCA_013333485.2_ASM1333348v2_genomic                          | {'K01834', 'K00927', 'K01689', 'K01803', 'K00134', 'K00873'}                     | M00002 |
| GCA_013333485.2_ASM1333348v2_genomic                          | {'K02108', 'K02115', 'K02110', 'K02113', 'K02109', 'K02112', 'K02111', 'K02114'} | M00157 |
| RSZYD18187312_A_saliva.metaspades.bin.49                      | {'K01834', 'K00927', 'K01689', 'K01803', 'K00134', 'K00873'}                     | M00002 |
| RSZYD18187312_A_saliva.metaspades.bin.49                      | {'K02108', 'K02115', 'K02110', 'K02113', 'K02109', 'K02112', 'K02111', 'K02114'} | M00157 |
| GCA_010014525.1_ASM1001452v1_genomic                          | {'K01834', 'K00927', 'K01689', 'K01803', 'K00134', 'K00873'}                     | M00002 |
| RSZYD18187690_A_saliva.metaspades.bin.20                      | {'K01834', 'K00927', 'K01689', 'K01803', 'K00134', 'K00873'}                     | M00002 |
| RSZYD18187690_A_saliva.metaspades.bin.20                      | {'K02108', 'K02115', 'K02110', 'K02113', 'K02109', 'K02112', 'K02111', 'K02114'} | M00157 |
| GCA_946478715.1_SRR10754055_bin.5_metawrap_v1.3.0_MAG_genomic | {'K02108', 'K02109', 'K02112', 'K02111', 'K02115', 'K02110', 'K02114'}           | M00157 |
| GCA_946478715.1_SRR10754055_bin.5_metawrap_v1.3.0_MAG_genomic | {'K02298', 'K02300', 'K02297', 'K02299'}                                         | M00417 |
| RSZYD18187118_A_saliva.metaspades.bin.24                      | {'K01834', 'K00927', 'K01689', 'K01803', 'K00134', 'K00873'}                     | M00002 |
| RSZYD18187118_A_saliva.metaspades.bin.24                      | {'K02108', 'K02115', 'K02110', 'K02113', 'K02109', 'K02112', 'K02111', 'K02114'} | M00157 |
| GCA_025349965.1_ASM2534996v1_genomic                          | {'K00927', 'K01803', 'K00134', 'K00873'}                                         | M00002 |
| GCA_025349965.1_ASM2534996v1_genomic                          | {'K02108', 'K02115', 'K02110', 'K02113', 'K02109', 'K02112', 'K02111', 'K02114'} | M00157 |
| RSZYD18187911_A_saliva.metaspades.bin.37                      | {'K01834', 'K00927', 'K01689', 'K01803', 'K00134', 'K00873'}                     | M00002 |
| RSZYD18187911_A_saliva.metaspades.bin.37                      | {'K02108', 'K02115', 'K02110', 'K02113', 'K02109', 'K02112', 'K02111', 'K02114'} | M00157 |
| YS001002_saliva.spades.bin.13                                 | {'K01834', 'K00927', 'K01689', 'K01803', 'K00873'}                               | M00002 |
| YS001002_saliva.spades.bin.13                                 | {'K02108', 'K02115', 'K02110', 'K02113', 'K02109', 'K02112', 'K02111', 'K02114'} | M00157 |
| YS000165_saliva.spades.bin.32                                 | {'K01834', 'K00927', 'K01689', 'K01803', 'K00134', 'K00873'}                     | M00002 |
| YS000165_saliva.spades.bin.32                                 | {'K02108', 'K02115', 'K02110', 'K02113', 'K02109', 'K02112', 'K02111', 'K02114'} | M00157 |
| RSZYD18187273_A_saliva.metaspades.bin.99                      | {'K15633', 'K00927', 'K01689', 'K01803', 'K00134', 'K00873'}                     | M00002 |
| RSZYD18187273_A_saliva.metaspades.bin.99                      | {'K00625', 'K00925'}                                                             | M00579 |
| RDPYD18300328_A_saliva.metaspades.bin.32                      | {'K01834', 'K00927', 'K01689', 'K01803', 'K00134', 'K00873'}                     | M00002 |
| RDPYD18300328_A_saliva.metaspades.bin.32                      | {'K02108', 'K02115', 'K02110', 'K02113', 'K02109', 'K02112', 'K02111', 'K02114'} | M00157 |
| RSZYD18187874_A_saliva.metaspades.bin.29                      | {'K01834', 'K00927', 'K01689', 'K01803', 'K00134', 'K00873'}                     | M00002 |
| RSZYD18187874_A_saliva.metaspades.bin.29                      | {'K02108', 'K02115', 'K02110', 'K02113', 'K02109', 'K02112', 'K02111', 'K02114'} | M00157 |
| GCA_016700315.1_ASM1670031v1_genomic                          | {'K00927', 'K15634', 'K01689', 'K01803', 'K00134', 'K00873'}                     | M00002 |
| GCA_016700315.1_ASM1670031v1_genomic                          | {'K02108', 'K02115', 'K02110', 'K02113', 'K02109', 'K02112', 'K02111', 'K02114'} | M00157 |
| GCA_016700315.1_ASM1670031v1_genomic                          | {'K02298', 'K02300', 'K02297', 'K02299'}                                         | M00417 |
| GCA_002316545.1_ASM231654v1_genomic                           | {'K00927', 'K15634', 'K01689', 'K01803', 'K00134', 'K00873'}                     | M00002 |
| GCA_002316545.1_ASM231654v1_genomic                           | {'K02108', 'K02112', 'K02111', 'K02115', 'K02110', 'K02113', 'K02114'}           | M00157 |



|                                                             |                                                                                  |        |
|-------------------------------------------------------------|----------------------------------------------------------------------------------|--------|
| GCA_002316545.1_ASM231654v1_genomic                         | {'K02298', 'K02300', 'K02297', 'K02299'}                                         | M00417 |
| SZAXPI018323-25_RA_dental.metaspades.bin.25                 | {'K15633', 'K00927', 'K01689', 'K01803', 'K00134', 'K00873'}                     | M00002 |
| SZAXPI018323-25_RA_dental.metaspades.bin.25                 | {'K00625', 'K00925'}                                                             | M00579 |
| R0170300320_tooth_RAH.megahit.bin.52                        | {'K01834', 'K01689', 'K01803', 'K00873'}                                         | M00002 |
| R0170300320_tooth_RAH.megahit.bin.52                        | {'K02108', 'K02115', 'K02110', 'K02113', 'K02109', 'K02112', 'K02111', 'K02114'} | M00157 |
| RDYD18099149_A_tongue.metaspades.bin.20                     | {'K01834', 'K00927', 'K01689', 'K01803', 'K00134', 'K00873'}                     | M00002 |
| RDYD18099149_A_tongue.metaspades.bin.20                     | {'K02108', 'K02115', 'K02110', 'K02113', 'K02109', 'K02112', 'K02111', 'K02114'} | M00157 |
| SRR8114034.metaspades.bin.21                                | {'K01834', 'K00927', 'K01689', 'K01803', 'K00134', 'K00873'}                     | M00002 |
| SRR8114034.metaspades.bin.21                                | {'K02108', 'K02115', 'K02110', 'K02113', 'K02109', 'K02112', 'K02111', 'K02114'} | M00157 |
| GCA_002429245.1_ASM242924v1_genomic                         | {'K00927', 'K01803', 'K00134', 'K00873'}                                         | M00002 |
| GCA_002429245.1_ASM242924v1_genomic                         | {'K02108', 'K02115', 'K02110', 'K02113', 'K02109', 'K02112', 'K02111', 'K02114'} | M00157 |
| GCA_002429245.1_ASM242924v1_genomic                         | {'K02298', 'K02300', 'K02297', 'K02299'}                                         | M00417 |
| YS001048_saliva.spades.bin.21                               | {'K01834', 'K00927', 'K01689', 'K01803', 'K00134', 'K00873'}                     | M00002 |
| YS001048_saliva.spades.bin.21                               | {'K02108', 'K02115', 'K02110', 'K02113', 'K02109', 'K02112', 'K02111', 'K02114'} | M00157 |
| RDYD18189867_A_saliva.metaspades.bin.12                     | {'K01834', 'K00927', 'K01689', 'K01803', 'K00134', 'K00873'}                     | M00002 |
| RDYD18189867_A_saliva.metaspades.bin.12                     | {'K02108', 'K02115', 'K02110', 'K02113', 'K02109', 'K02112', 'K02111', 'K02114'} | M00157 |
| GCA_947166125.1_SRR8387714_bin.9_metaWRAP_v1.3_MAG_genomic  | {'K15633', 'K00927', 'K01689', 'K01803', 'K00134', 'K00873'}                     | M00002 |
| GCA_947166125.1_SRR8387714_bin.9_metaWRAP_v1.3_MAG_genomic  | {'K01897'}                                                                       | M00086 |
| GCA_947166125.1_SRR8387714_bin.9_metaWRAP_v1.3_MAG_genomic  | {'K00925', 'K00625', 'K13788'}                                                   | M00579 |
| RSZYD18078550_A_saliva.metaspades.bin.59                    | {'K01834', 'K00927', 'K01689', 'K01803', 'K00134', 'K00873'}                     | M00002 |
| RSZYD18078550_A_saliva.metaspades.bin.59                    | {'K02108', 'K02115', 'K02110', 'K02113', 'K02109', 'K02112', 'K02111', 'K02114'} | M00157 |
| GCA_027325955.1_ASM2732595v1_genomic                        | {'K02108', 'K02109', 'K02112', 'K02111', 'K02115', 'K02113', 'K02114'}           | M00157 |
| GCA_027325955.1_ASM2732595v1_genomic                        | {'K02298', 'K02300', 'K02297', 'K02299'}                                         | M00417 |
| RSZYD18078674_A_saliva.metaspades.bin.36                    | {'K01834', 'K00927', 'K01689', 'K01803', 'K00134', 'K00873'}                     | M00002 |
| RDYD18201791_A_saliva.metaspades.bin.75                     | {'K01834', 'K00927', 'K01689', 'K01803', 'K00134', 'K00873'}                     | M00002 |
| R0170300221_tooth_RA.megahit.bin.10                         | {'K00927', 'K01689', 'K01803', 'K00134', 'K00873'}                               | M00002 |
| R0170300221_tooth_RA.megahit.bin.10                         | {'K02108', 'K02115', 'K02110', 'K02113', 'K02109', 'K02112', 'K02111', 'K02114'} | M00157 |
| GCA_027334585.1_ASM2733458v1_genomic                        | {'K00927', 'K01803', 'K00134', 'K00873'}                                         | M00002 |
| GCA_027334585.1_ASM2733458v1_genomic                        | {'K02108', 'K02115', 'K02110', 'K02113', 'K02109', 'K02112', 'K02111', 'K02114'} | M00157 |
| GCA_027334585.1_ASM2733458v1_genomic                        | {'K02298', 'K02300', 'K02297', 'K02299'}                                         | M00417 |
| RSZYD18187116_A_saliva.metaspades.bin.9                     | {'K01834', 'K00927', 'K01689', 'K01803', 'K00134', 'K00873'}                     | M00002 |
| R0170300184_tooth_RA.megahit.bin.85                         | {'K15633', 'K00927', 'K01689', 'K01803', 'K00134', 'K00873'}                     | M00002 |
| R0170300184_tooth_RA.megahit.bin.85                         | {'K00625', 'K00925'}                                                             | M00579 |
| YS000142_saliva.spades.bin.13                               | {'K01834', 'K00927', 'K01689', 'K01803', 'K00134', 'K00873'}                     | M00002 |
| YS000142_saliva.spades.bin.13                               | {'K02108', 'K02115', 'K02110', 'K02113', 'K02109', 'K02112', 'K02111', 'K02114'} | M00157 |
| GCA_013099195.1_ASM1309919v1_genomic                        | {'K01834', 'K00927', 'K01689', 'K01803', 'K00134', 'K00873'}                     | M00002 |
| GCA_013099195.1_ASM1309919v1_genomic                        | {'K02108', 'K02109', 'K02112', 'K02111', 'K02115', 'K02110', 'K02114'}           | M00157 |
| R0170300190_tooth_RA.megahit.bin.12                         | {'K00927', 'K01689', 'K01803', 'K00134', 'K00873'}                               | M00002 |
| R0170300190_tooth_RA.megahit.bin.12                         | {'K02108', 'K02115', 'K02110', 'K02113', 'K02109', 'K02112', 'K02111', 'K02114'} | M00157 |
| RSZYD18078760_A_saliva.metaspades.bin.11                    | {'K01834', 'K00927', 'K01689', 'K01803', 'K00134', 'K00873'}                     | M00002 |
| R0170300207_tooth_RA.megahit.bin.21                         | {'K15633', 'K00927', 'K01689', 'K01803', 'K00134', 'K00873'}                     | M00002 |
| R0170300207_tooth_RA.megahit.bin.21                         | {'K02108', 'K02115', 'K02110', 'K02113', 'K02109', 'K02112', 'K02111', 'K02114'} | M00157 |
| GCA_001790535.1_ASM179053v1_genomic                         | {'K00927', 'K01803', 'K00134', 'K00873'}                                         | M00002 |
| GCA_001790535.1_ASM179053v1_genomic                         | {'K02108', 'K02115', 'K02110', 'K02113', 'K02109', 'K02112', 'K02111', 'K02114'} | M00157 |
| GCA_027459325.1_ASM2745932v1_genomic                        | {'K02108', 'K02109', 'K02112', 'K02111', 'K02115', 'K02110', 'K02114'}           | M00157 |
| GCA_027459325.1_ASM2745932v1_genomic                        | {'K02298', 'K02300', 'K02297', 'K02299'}                                         | M00417 |
| GCA_020428275.1_ASM2042827v1_genomic                        | {'K00927', 'K01803', 'K00134', 'K00873'}                                         | M00002 |
| GCA_020428275.1_ASM2042827v1_genomic                        | {'K02108', 'K02115', 'K02110', 'K02113', 'K02109', 'K02112', 'K02111', 'K02114'} | M00157 |
| GCA_020428275.1_ASM2042827v1_genomic                        | {'K02298', 'K02300', 'K02297', 'K02299'}                                         | M00417 |
| SZAXPI018484-16_RA_saliva.metaspades.bin.36                 | {'K00927', 'K01689', 'K01803', 'K00134', 'K00873'}                               | M00002 |
| RSZYD18187400_A_saliva.metaspades.bin.14                    | {'K00927', 'K01689', 'K01803', 'K00134', 'K00873'}                               | M00002 |
| RSZYD18187400_A_saliva.metaspades.bin.14                    | {'K02108', 'K02115', 'K02110', 'K02113', 'K02109', 'K02112', 'K02111', 'K02114'} | M00157 |
| GCA_001790365.1_ASM179036v1_genomic                         | {'K00927', 'K01803', 'K00134', 'K00873'}                                         | M00002 |
| GCA_001790365.1_ASM179036v1_genomic                         | {'K02108', 'K02112', 'K02111', 'K02115', 'K02110', 'K02113', 'K02114'}           | M00157 |
| GCA_001790365.1_ASM179036v1_genomic                         | {'K02298', 'K02300', 'K02297', 'K02299'}                                         | M00417 |
| R0170300299_tooth_RAH.megahit.bin.100                       | {'K01834', 'K01689', 'K00873'}                                                   | M00002 |
| R0170300299_tooth_RAH.megahit.bin.100                       | {'K02108', 'K02115', 'K02110', 'K02113', 'K02109', 'K02112', 'K02111', 'K02114'} | M00157 |
| SZAXPI018099-20_RA_dental.metaspades.bin.40                 | {'K00927', 'K01689', 'K01803', 'K00134', 'K00873'}                               | M00002 |
| SZAXPI018099-20_RA_dental.metaspades.bin.40                 | {'K02108', 'K02115', 'K02110', 'K02113', 'K02109', 'K02112', 'K02111', 'K02114'} | M00157 |
| RSZYD18187002_A_saliva.metaspades.bin.29                    | {'K15633', 'K00927', 'K01689', 'K01803', 'K00134', 'K00873'}                     | M00002 |
| RSZYD18187002_A_saliva.metaspades.bin.29                    | {'K00625', 'K00925'}                                                             | M00579 |
| SZAXPI018317-19_RA_dental.metaspades.bin.31                 | {'K01834', 'K00927', 'K01689', 'K01803', 'K00134', 'K00873'}                     | M00002 |
| SZAXPI018317-19_RA_dental.metaspades.bin.31                 | {'K02108', 'K02112', 'K02111', 'K02115', 'K02110', 'K02113', 'K02114'}           | M00157 |
| R0170300222_tooth_RA.megahit.bin.89                         | {'K01834', 'K00927', 'K01689', 'K01803', 'K00134', 'K00873'}                     | M00002 |
| GCA_017460065.1                                             | {'K15633', 'K00927', 'K01689', 'K01803', 'K00134', 'K00873'}                     | M00002 |
| GCA_017460065.1                                             | {'K01897'}                                                                       | M00086 |
| GCA_017460065.1                                             | {'K00625', 'K00925'}                                                             | M00579 |
| RSZAXPI002604-26_RA_dental.metaspades.bin.30                | {'K01834', 'K00927', 'K01689', 'K01803', 'K00134', 'K00873'}                     | M00002 |
| RSZAXPI002604-26_RA_dental.metaspades.bin.30                | {'K02108', 'K02109', 'K02112', 'K02111', 'K02115', 'K02110', 'K02114'}           | M00157 |
| GCA_009783305.1_ASM978330v1_genomic                         | {'K15633', 'K00927', 'K01689', 'K01803', 'K00134', 'K00873'}                     | M00002 |
| GCA_009783305.1_ASM978330v1_genomic                         | {'K00625', 'K00925'}                                                             | M00579 |
| GCA_027426955.1_ASM2742695v1_genomic                        | {'K00927', 'K01803', 'K00134', 'K00873'}                                         | M00002 |
| GCA_027426955.1_ASM2742695v1_genomic                        | {'K02108', 'K02109', 'K02112', 'K02111', 'K02115', 'K02110', 'K02114'}           | M00157 |
| GCA_027426955.1_ASM2742695v1_genomic                        | {'K02298', 'K02300', 'K02297', 'K02299'}                                         | M00417 |
| RSZYD18078322_A_saliva.metaspades.bin.73                    | {'K15633', 'K00927', 'K01689', 'K01803', 'K00134', 'K00873'}                     | M00002 |
| RSZYD18078322_A_saliva.metaspades.bin.73                    | {'K00625', 'K00925'}                                                             | M00579 |
| SRR8114052.metaspades.bin.61                                | {'K01834', 'K00927', 'K01689', 'K01803', 'K00134', 'K00873'}                     | M00002 |
| GCA_002413835.1_ASM241383v1_genomic                         | {'K00927', 'K01803', 'K00134', 'K00873'}                                         | M00002 |
| GCA_002413835.1_ASM241383v1_genomic                         | {'K02108', 'K02115', 'K02110', 'K02113', 'K02109', 'K02112', 'K02111', 'K02114'} | M00157 |
| GCA_002413835.1_ASM241383v1_genomic                         | {'K02298', 'K02300', 'K02297', 'K02299'}                                         | M00417 |
| RSZYD18187144_A_saliva.metaspades.bin.68                    | {'K15633', 'K00927', 'K01689', 'K01803', 'K00134', 'K00873'}                     | M00002 |
| RSZYD18187144_A_saliva.metaspades.bin.68                    | {'K00625', 'K00925'}                                                             | M00579 |
| R0170300176_tooth_RA.megahit.bin.28                         | {'K15633', 'K00927', 'K01689', 'K01803', 'K00134', 'K00873'}                     | M00002 |
| R0170300176_tooth_RA.megahit.bin.28                         | {'K00925', 'K00625', 'K13788'}                                                   | M00579 |
| GCA_027492635.1_ASM2749263v1_genomic                        | {'K01834', 'K00927', 'K01803', 'K00134', 'K00873'}                               | M00002 |
| GCA_027492635.1_ASM2749263v1_genomic                        | {'K02108', 'K02115', 'K02110', 'K02113', 'K02109', 'K02112', 'K02111', 'K02114'} | M00157 |
| GCA_027492635.1_ASM2749263v1_genomic                        | {'K02298', 'K02300', 'K02297', 'K02299'}                                         | M00417 |
| RSZYD18187862_A_saliva.metaspades.bin.43                    | {'K01834', 'K00927', 'K01689', 'K01803', 'K00134', 'K00873'}                     | M00002 |
| RSZYD18187862_A_saliva.metaspades.bin.43                    | {'K02108', 'K02115', 'K02110', 'K02113', 'K02109', 'K02112', 'K02111', 'K02114'} | M00157 |
| YS001160_saliva.spades.bin.8                                | {'K01834', 'K00927', 'K01689', 'K01803', 'K00134', 'K00873'}                     | M00002 |
| YS001160_saliva.spades.bin.8                                | {'K02108', 'K02115', 'K02110', 'K02113', 'K02109', 'K02112', 'K02111', 'K02114'} | M00157 |
| GCA_947364605.1_SRR16350204_bin.1_metawrap_v1.3_MAG_genomic | {'K15633', 'K00927', 'K01803', 'K00134', 'K00873'}                               | M00002 |
| R0170300303_tooth_RAH.megahit.bin.44                        | {'K01834', 'K00927', 'K01689', 'K01803', 'K00134', 'K00873'}                     | M00002 |
| R0170300303_tooth_RAH.megahit.bin.44                        | {'K00625', 'K00925'}                                                             | M00579 |
| YS000296_saliva.spades.bin.5                                | {'K01834', 'K00927', 'K01689', 'K01803', 'K00134', 'K00873'}                     | M00002 |
| YS000296_saliva.spades.bin.5                                | {'K02108', 'K02115', 'K02110', 'K02113', 'K02109', 'K02112', 'K02111', 'K02114'} | M00157 |
| R0170300145_tooth_RA.megahit.bin.44                         | {'K00927', 'K01689', 'K01803', 'K00134', 'K00873'}                               | M00002 |
| R0170300145_tooth_RA.megahit.bin.44                         | {'K02108', 'K02115', 'K02110', 'K02113', 'K02109', 'K02112', 'K02111', 'K02114'} | M00157 |
| GCA_905373835.1_SRR9217492-mag-bin.7_genomic                | {'K01834', 'K01689', 'K00873'}                                                   | M00002 |
| GCA_905373835.1_SRR9217492-mag-bin.7_genomic                | {'K02108', 'K02115', 'K02110', 'K02113', 'K02109', 'K02112', 'K02111', 'K02114'} | M00157 |
| GCA_002404315.1_ASM240431v1_genomic                         | {'K00927', 'K01803', 'K00134', 'K00873'}                                         | M00002 |
| GCA_002404315.1_ASM240431v1_genomic                         | {'K02108', 'K02115', 'K02110', 'K02113', 'K02109', 'K02112', 'K02111', 'K02114'} | M00157 |
| GCA_017404515.1                                             | {'K15633', 'K00927', 'K01689', 'K01803', 'K00134', 'K00873'}                     | M00002 |
| GCA_017404515.1                                             | {'K00625', 'K00925'}                                                             | M00579 |
| RSZAXPI002636-95_RA_dental.metaspades.bin.34                | {'K01834', 'K01689', 'K00873'}                                                   | M00002 |

|                                                                    |                                                                                  |        |
|--------------------------------------------------------------------|----------------------------------------------------------------------------------|--------|
| RSZAXPI002636-95_RA_dental.metaspades.bin.34                       | {'K02108', 'K02109', 'K02112', 'K02111', 'K02115', 'K02110', 'K02113'}           | M00157 |
| RSZYD18187631_A_saliva.metaspades.bin.12                           | {'K00927', 'K01689', 'K01803', 'K00134', 'K00873'}                               | M00002 |
| RSZYD18187631_A_saliva.metaspades.bin.12                           | {'K02108', 'K02115', 'K02110', 'K02113', 'K02109', 'K02112', 'K02111', 'K02114'} | M00157 |
| SRR6748220.metaspades.bin.9                                        | {'K01834', 'K00927', 'K01689', 'K01803', 'K00134', 'K00873'}                     | M00002 |
| SRR6748220.metaspades.bin.9                                        | {'K02108', 'K02115', 'K02110', 'K02113', 'K02109', 'K02112', 'K02111', 'K02114'} | M00157 |
| YS000918_saliva.spades.bin.33                                      | {'K01834', 'K00927', 'K01689', 'K01803', 'K00134', 'K00873'}                     | M00002 |
| YS000918_saliva.spades.bin.33                                      | {'K02108', 'K02115', 'K02110', 'K02113', 'K02109', 'K02112', 'K02111', 'K02114'} | M00157 |
| R0170300062_tooth_RA.megahit.bin.66                                | {'K01834', 'K00927', 'K01689', 'K01803', 'K00134', 'K00873'}                     | M00002 |
| R0170300062_tooth_RA.megahit.bin.66                                | {'K02108', 'K02115', 'K02110', 'K02113', 'K02109', 'K02112', 'K02111', 'K02114'} | M00157 |
| R0170300182_tooth_RA.megahit.bin.100                               | {'K01834', 'K00927', 'K01689', 'K01803', 'K00134', 'K00873'}                     | M00002 |
| YS001090_saliva.spades.bin.11                                      | {'K01834', 'K00927', 'K01689', 'K01803', 'K00134', 'K00873'}                     | M00002 |
| YS001090_saliva.spades.bin.11                                      | {'K02108', 'K02115', 'K02110', 'K02113', 'K02109', 'K02112', 'K02111', 'K02114'} | M00157 |
| GCA_004294965.1_ASM429496v1_genomic                                | {'K01834', 'K00927', 'K15634', 'K01803', 'K00134', 'K00873'}                     | M00002 |
| GCA_004294965.1_ASM429496v1_genomic                                | {'K02108', 'K02115', 'K02110', 'K02113', 'K02109', 'K02112', 'K02111', 'K02114'} | M00157 |
| GCA_004294965.1_ASM429496v1_genomic                                | {'K02298', 'K02300', 'K02297', 'K02299'}                                         | M00417 |
| GCA_017962365.1_ASM1796236v1_genomic                               | {'K15633', 'K00927', 'K01689', 'K01803', 'K00134', 'K00873'}                     | M00002 |
| GCA_017962365.1_ASM1796236v1_genomic                               | {'K01897'}                                                                       | M00086 |
| GCA_017962365.1_ASM1796236v1_genomic                               | {'K00625', 'K00925'}                                                             | M00579 |
| R0170300110_tooth_RA.megahit.bin.64                                | {'K00927', 'K01689', 'K01803', 'K00134', 'K00873'}                               | M00002 |
| R0170300110_tooth_RA.megahit.bin.64                                | {'K02108', 'K02115', 'K02110', 'K02113', 'K02109', 'K02112', 'K02111', 'K02114'} | M00157 |
| RSZYD18078361_A_saliva.metaspades.bin.38                           | {'K01834', 'K00927', 'K01689', 'K01803', 'K00134', 'K00873'}                     | M00002 |
| RSZYD18078361_A_saliva.metaspades.bin.38                           | {'K02108', 'K02115', 'K02110', 'K02113', 'K02109', 'K02112', 'K02111', 'K02114'} | M00157 |
| GCA_016699955.1_ASM1669995v1_genomic                               | {'K00927', 'K01689', 'K01803', 'K00134', 'K00873'}                               | M00002 |
| GCA_016699955.1_ASM1669995v1_genomic                               | {'K02108', 'K02115', 'K02110', 'K02113', 'K02109', 'K02112', 'K02111', 'K02114'} | M00157 |
| GCA_016699955.1_ASM1669995v1_genomic                               | {'K02298', 'K02300', 'K02297', 'K02299'}                                         | M00417 |
| SZAXPI018312-14_RA_dental.metaspades.bin.67                        | {'K01834', 'K00927', 'K01689', 'K01803', 'K00134', 'K00873'}                     | M00002 |
| SZAXPI018312-14_RA_dental.metaspades.bin.67                        | {'K00625', 'K00925'}                                                             | M00579 |
| R0170300222_tooth_RA.megahit.bin.120                               | {'K00927', 'K01689', 'K01803', 'K00134', 'K00873'}                               | M00002 |
| R0170300222_tooth_RA.megahit.bin.120                               | {'K02108', 'K02115', 'K02110', 'K02113', 'K02109', 'K02112', 'K02111', 'K02114'} | M00157 |
| GCA_009787015.1_ASM978701v1_genomic                                | {'K01834', 'K15633', 'K00927', 'K15634', 'K01689', 'K01803', 'K00134', 'K00873'} | M00002 |
| GCA_009787015.1_ASM978701v1_genomic                                | {'K01897'}                                                                       | M00086 |
| GCA_009787015.1_ASM978701v1_genomic                                | {'K00625', 'K00925'}                                                             | M00579 |
| GCA_017433185.1                                                    | {'K15633', 'K00927', 'K15634', 'K01689', 'K01803', 'K00134', 'K00873'}           | M00002 |
| GCA_017433185.1                                                    | {'K01897'}                                                                       | M00086 |
| GCA_017433185.1                                                    | {'K00625', 'K00925'}                                                             | M00579 |
| R0170300323_tooth_RAH.megahit.bin.84                               | {'K00927', 'K01689', 'K01803', 'K00134', 'K00873'}                               | M00002 |
| R0170300323_tooth_RAH.megahit.bin.84                               | {'K02108', 'K02115', 'K02110', 'K02113', 'K02109', 'K02112', 'K02111', 'K02114'} | M00157 |
| RSZYD18187324_A_saliva.metaspades.bin.25                           | {'K01834', 'K00927', 'K01689', 'K01803', 'K00134', 'K00873'}                     | M00002 |
| RSZYD18187324_A_saliva.metaspades.bin.25                           | {'K02108', 'K02115', 'K02110', 'K02113', 'K02109', 'K02112', 'K02111', 'K02114'} | M00157 |
| R0170300325_tooth_RA.megahit.bin.68                                | {'K01834', 'K01689', 'K00873'}                                                   | M00002 |
| R0170300325_tooth_RA.megahit.bin.68                                | {'K02108', 'K02115', 'K02110', 'K02113', 'K02109', 'K02112', 'K02111', 'K02114'} | M00157 |
| RSZYD18078756_A_saliva.metaspades.bin.24                           | {'K15633', 'K00927', 'K01689', 'K01803', 'K00134', 'K00873'}                     | M00002 |
| RSZYD18078756_A_saliva.metaspades.bin.24                           | {'K00625', 'K00925'}                                                             | M00579 |
| GCA_017432365.1                                                    | {'K15633', 'K00927', 'K01689', 'K01803', 'K00134', 'K00873'}                     | M00002 |
| GCA_007120515.1_ASM712051v1_genomic                                | {'K01834', 'K00927', 'K01689', 'K01803', 'K00134', 'K00873'}                     | M00002 |
| GCA_007120515.1_ASM712051v1_genomic                                | {'K02108', 'K02115', 'K02110', 'K02113', 'K02109', 'K02112', 'K02111', 'K02114'} | M00157 |
| SZAXPI018309-166_RA_dental.metaspades.bin.21                       | {'K01834', 'K01689', 'K01803', 'K00134', 'K00873'}                               | M00002 |
| SZAXPI018309-166_RA_dental.metaspades.bin.21                       | {'K02108', 'K02115', 'K02110', 'K02113', 'K02109', 'K02112', 'K02111', 'K02114'} | M00157 |
| GCA_017307155.1                                                    | {'K01834', 'K00927', 'K01689', 'K01803', 'K00134', 'K00873'}                     | M00002 |
| GCA_017307155.1                                                    | {'K02108', 'K02115', 'K02110', 'K02113', 'K02109', 'K02112', 'K02111', 'K02114'} | M00157 |
| GCA_017307155.1                                                    | {'K02298', 'K02300', 'K02297', 'K02299'}                                         | M00417 |
| RSZAXPI002632-89_RA_dental.metaspades.bin.17                       | {'K15633', 'K00927', 'K01689', 'K01803', 'K00134', 'K00873'}                     | M00002 |
| RSZAXPI002632-89_RA_dental.metaspades.bin.17                       | {'K00625', 'K00925'}                                                             | M00579 |
| YS000547_saliva.spades.bin.14                                      | {'K01834', 'K00927', 'K01689', 'K01803', 'K00134', 'K00873'}                     | M00002 |
| YS000547_saliva.spades.bin.14                                      | {'K02108', 'K02115', 'K02110', 'K02113', 'K02109', 'K02112', 'K02111', 'K02114'} | M00157 |
| RDPYD18189874_A_saliva.metaspades.bin.36                           | {'K01834', 'K00927', 'K01689', 'K01803', 'K00134', 'K00873'}                     | M00002 |
| RDPYD18189874_A_saliva.metaspades.bin.36                           | {'K02108', 'K02115', 'K02110', 'K02113', 'K02109', 'K02112', 'K02111', 'K02114'} | M00157 |
| R0170300253_tooth_RAH.megahit.bin.13                               | {'K01834', 'K01689', 'K00873'}                                                   | M00002 |
| R0170300253_tooth_RAH.megahit.bin.13                               | {'K02108', 'K02115', 'K02110', 'K02113', 'K02109', 'K02112', 'K02111', 'K02114'} | M00157 |
| R0170300303_tooth_RAH.megahit.bin.49                               | {'K15633', 'K00927', 'K01689', 'K01803', 'K00134', 'K00873'}                     | M00002 |
| R0170300303_tooth_RAH.megahit.bin.49                               | {'K00625', 'K00925'}                                                             | M00579 |
| RDPYD18189959_A_saliva.metaspades.bin.31                           | {'K15633', 'K00927', 'K01689', 'K01803', 'K00134', 'K00873'}                     | M00002 |
| RDPYD18189959_A_saliva.metaspades.bin.31                           | {'K00625', 'K00925'}                                                             | M00579 |
| RDPYD18075172_A_saliva.metaspades.bin.27                           | {'K01834', 'K00927', 'K01689', 'K01803', 'K00134', 'K00873'}                     | M00002 |
| RDPYD18075172_A_saliva.metaspades.bin.27                           | {'K02108', 'K02115', 'K02110', 'K02113', 'K02109', 'K02112', 'K02111', 'K02114'} | M00157 |
| SZAXPI018188-46_RA_dental.metaspades.bin.49                        | {'K01834', 'K01689', 'K00873'}                                                   | M00002 |
| SZAXPI018188-46_RA_dental.metaspades.bin.49                        | {'K02108', 'K02109', 'K02111', 'K02115', 'K02110', 'K02113'}                     | M00157 |
| GCA_027323755.1_ASM2732375v1_genomic                               | {'K00927', 'K01803', 'K00134', 'K00873'}                                         | M00002 |
| GCA_027323755.1_ASM2732375v1_genomic                               | {'K02108', 'K02115', 'K02110', 'K02113', 'K02109', 'K02112', 'K02111', 'K02114'} | M00157 |
| RDPYD18189853_A_saliva.metaspades.bin.43                           | {'K01834', 'K00927', 'K01689', 'K01803', 'K00134', 'K00873'}                     | M00002 |
| RDPYD18189853_A_saliva.metaspades.bin.43                           | {'K02108', 'K02115', 'K02110', 'K02113', 'K02109', 'K02112', 'K02111', 'K02114'} | M00157 |
| GCA_015257445.1_ASM1525744v1_genomic                               | {'K15633', 'K00927', 'K01689', 'K01803', 'K00134', 'K00873'}                     | M00002 |
| GCA_015257445.1_ASM1525744v1_genomic                               | {'K00625', 'K00925'}                                                             | M00579 |
| GCA_027427755.1_ASM2742775v1_genomic                               | {'K02108', 'K02115', 'K02110', 'K02113', 'K02109', 'K02112', 'K02111', 'K02114'} | M00157 |
| GCA_027427755.1_ASM2742775v1_genomic                               | {'K02298', 'K02300', 'K02297', 'K02299'}                                         | M00417 |
| GCA_947307445.1_SRR10912535_bin.43_metaWRAP_v1.3_MAG_genomic       | {'K01689', 'K00927', 'K00134', 'K00873'}                                         | M00002 |
| GCA_947307445.1_SRR10912535_bin.43_metaWRAP_v1.3_MAG_genomic       | {'K00625', 'K00925'}                                                             | M00579 |
| RDPYD18201685_A_saliva.metaspades.bin.24                           | {'K01834', 'K00927', 'K01689', 'K01803', 'K00134', 'K00873'}                     | M00002 |
| R0170300222_tooth_RA.megahit.bin.94                                | {'K01834', 'K01689', 'K00873'}                                                   | M00002 |
| R0170300222_tooth_RA.megahit.bin.94                                | {'K02108', 'K02115', 'K02110', 'K02113', 'K02109', 'K02112', 'K02111', 'K02114'} | M00157 |
| GCA_018060465.1_ASM1806046v1_genomic                               | {'K00927', 'K01689', 'K01803', 'K00134', 'K00873'}                               | M00002 |
| GCA_018060465.1_ASM1806046v1_genomic                               | {'K02108', 'K02115', 'K02110', 'K02113', 'K02109', 'K02112', 'K02111', 'K02114'} | M00157 |
| R0170300231_tooth_RA.megahit.bin.16                                | {'K01834', 'K00927', 'K01803', 'K00134', 'K00873'}                               | M00002 |
| GCA_017514675.1_ASM1751467v1_genomic                               | {'K15633', 'K00927', 'K01689', 'K00134', 'K00873'}                               | M00002 |
| GCA_017514675.1_ASM1751467v1_genomic                               | {'K01897'}                                                                       | M00086 |
| GCA_947429355.1_SRR19981115_bin.23_metawrap_v1.3_MAG_genomic       | {'K15633', 'K00927', 'K01689', 'K01803', 'K00134', 'K00873'}                     | M00002 |
| GCA_947429355.1_SRR19981115_bin.23_metawrap_v1.3_MAG_genomic       | {'K00625', 'K00925'}                                                             | M00579 |
| GCA_947569885.1_SRR15604579_bin.36_metawrap_v1.3_MAG_genomic       | {'K15633', 'K00927', 'K01689', 'K01803', 'K00134', 'K00873'}                     | M00002 |
| GCA_947569885.1_SRR15604579_bin.36_metawrap_v1.3_MAG_genomic       | {'K00625', 'K00925'}                                                             | M00579 |
| GCA_946409605.1_SRR12081300_bin.39_metaWRAP_v1.3_MAG_genomic       | {'K01834', 'K15633', 'K00927', 'K01689', 'K01803', 'K00134', 'K00873'}           | M00002 |
| GCA_946409605.1_SRR12081300_bin.39_metaWRAP_v1.3_MAG_genomic       | {'K01897'}                                                                       | M00086 |
| GCA_946409605.1_SRR12081300_bin.39_metaWRAP_v1.3_MAG_genomic       | {'K00625', 'K00925'}                                                             | M00579 |
| GCA_027446985.1_ASM2744698v1_genomic                               | {'K02108', 'K02115', 'K02110', 'K02113', 'K02109', 'K02112', 'K02111', 'K02114'} | M00157 |
| GCA_027446985.1_ASM2744698v1_genomic                               | {'K02298', 'K02300', 'K02297', 'K02299'}                                         | M00417 |
| RSZYD18078214_A_saliva.metaspades.bin.42                           | {'K01834', 'K00927', 'K01689', 'K01803', 'K00134', 'K00873'}                     | M00002 |
| RSZYD18078214_A_saliva.metaspades.bin.42                           | {'K02108', 'K02115', 'K02110', 'K02113', 'K02109', 'K02112', 'K02111', 'K02114'} | M00157 |
| RSZYD18187508_A_saliva.metaspades.bin.8                            | {'K01834', 'K00927', 'K01689', 'K01803', 'K00134', 'K00873'}                     | M00002 |
| RSZYD18187508_A_saliva.metaspades.bin.8                            | {'K02108', 'K02115', 'K02110', 'K02113', 'K02109', 'K02112', 'K02111', 'K02114'} | M00157 |
| R0170300136_tooth_RA.megahit.bin.71                                | {'K15633', 'K00927', 'K01689', 'K01803', 'K00134', 'K00873'}                     | M00002 |
| R0170300136_tooth_RA.megahit.bin.71                                | {'K00625', 'K00925'}                                                             | M00579 |
| RSZAXPI002313-22_RAH_dental.metaspades.bin.48                      | {'K15633', 'K00927', 'K01689', 'K01803', 'K00134', 'K00873'}                     | M00002 |
| RSZAXPI002313-22_RAH_dental.metaspades.bin.48                      | {'K00625', 'K00925'}                                                             | M00579 |
| RDPYD18300081_A_saliva.metaspades.bin.39                           | {'K01834', 'K00927', 'K01689', 'K01803', 'K00134', 'K00873'}                     | M00002 |
| RDPYD18300081_A_saliva.metaspades.bin.39                           | {'K02108', 'K02112', 'K02111', 'K02115', 'K02110', 'K02114'}                     | M00157 |
| GCA_903829335.1_freshwater_MAG_---_AM-lipid-02-D1_bin-0304_genomic | {'K00927', 'K01803', 'K00134', 'K00873'}                                         | M00002 |



|                                                                    |                                                                                  |        |
|--------------------------------------------------------------------|----------------------------------------------------------------------------------|--------|
| GCA_903829335.1_freshwater_MAG_---_AM-lipid-02-D1_bin-0304_genomic | {'K02108', 'K02109', 'K02112', 'K02111', 'K02115', 'K02110', 'K02114'}           | M00157 |
| GCA_903829335.1_freshwater_MAG_---_AM-lipid-02-D1_bin-0304_genomic | {'K02298', 'K02300', 'K02297', 'K02299'}                                         | M00417 |
| GCA_946482285.1_SRR14536431_bin.16_metawrap_v1.3.0_MAG_genomic     | {'K01834', 'K00927', 'K01689', 'K01803', 'K00134', 'K00873'}                     | M00002 |
| GCA_946482285.1_SRR14536431_bin.16_metawrap_v1.3.0_MAG_genomic     | {'K02108', 'K02115', 'K02110', 'K02113', 'K02109', 'K02112', 'K02111', 'K02114'} | M00157 |
| R0170300274_tooth_RAH.megahit.bin.88                               | {'K15633', 'K00927', 'K01689', 'K01803', 'K00134', 'K00873'}                     | M00002 |
| R0170300274_tooth_RAH.megahit.bin.88                               | {'K00625', 'K00925'}                                                             | M00579 |
| GCA_934717805.1_ERR7745621_bin.22_genomic                          | {'K01834', 'K00927', 'K01689', 'K01803', 'K00134', 'K00873'}                     | M00002 |
| SRR6748161.metaspades.bin.16                                       | {'K01834', 'K00927', 'K01689', 'K01803', 'K00134', 'K00873'}                     | M00002 |
| SRR6748161.metaspades.bin.16                                       | {'K02108', 'K02115', 'K02110', 'K02113', 'K02109', 'K02112', 'K02111', 'K02114'} | M00157 |
| YS000632_saliva.spades.bin.35                                      | {'K01834', 'K00927', 'K01689', 'K01803', 'K00134', 'K00873'}                     | M00002 |
| YS000632_saliva.spades.bin.35                                      | {'K02108', 'K02115', 'K02110', 'K02113', 'K02109', 'K02112', 'K02111', 'K02114'} | M00157 |
| GCA_027492255.1_ASM2749225v1_genomic                               | {'K00927', 'K01803', 'K00134', 'K00873'}                                         | M00002 |
| GCA_027492255.1_ASM2749225v1_genomic                               | {'K02108', 'K02115', 'K02110', 'K02113', 'K02109', 'K02112', 'K02111', 'K02114'} | M00157 |
| SZAXPI018316-18_RA_dental.metaspades.bin.5                         | {'K01834', 'K01689', 'K00873'}                                                   | M00002 |
| SZAXPI018316-18_RA_dental.metaspades.bin.5                         | {'K02108', 'K02115', 'K02110', 'K02113', 'K02109', 'K02112', 'K02111', 'K02114'} | M00157 |
| GCA_002337095.1_ASM233709v1_genomic                                | {'K02108', 'K02115', 'K02110', 'K02113', 'K02109', 'K02112', 'K02111', 'K02114'} | M00157 |
| GCA_903821315.1_freshwater_MAG_---_AM-lipid-01-D2_bin-004_genomic  | {'K00927', 'K01803', 'K00134', 'K00873'}                                         | M00002 |
| GCA_903821315.1_freshwater_MAG_---_AM-lipid-01-D2_bin-004_genomic  | {'K02108', 'K02115', 'K02110', 'K02113', 'K02109', 'K02112', 'K02111', 'K02114'} | M00157 |
| GCA_903821315.1_freshwater_MAG_---_AM-lipid-01-D2_bin-004_genomic  | {'K02298', 'K02300', 'K02297', 'K02299'}                                         | M00417 |
| RDPYD18088954_A_saliva.metaspades.bin.47                           | {'K01834', 'K00927', 'K01803', 'K00134', 'K00873'}                               | M00002 |
| GCA_943350085.1_RH-15aug16-19_genomic                              | {'K00927', 'K01803', 'K00134', 'K00873'}                                         | M00002 |
| GCA_943350085.1_RH-15aug16-19_genomic                              | {'K02108', 'K02109', 'K02112', 'K02111', 'K02115', 'K02110', 'K02114'}           | M00157 |
| R0170300151_tooth_RA.megahit.bin.58                                | {'K01834', 'K01689', 'K01803', 'K00134', 'K00873'}                               | M00002 |
| R0170300151_tooth_RA.megahit.bin.58                                | {'K02108', 'K02109', 'K02112', 'K02111', 'K02115', 'K02110', 'K02114'}           | M00157 |
| GCA_946404095.1_SRR12081303_bin.66_metaWRAP_v1.3_MAG_genomic       | {'K15633', 'K00927', 'K01689', 'K01803', 'K00134', 'K00873'}                     | M00002 |
| GCA_946404095.1_SRR12081303_bin.66_metaWRAP_v1.3_MAG_genomic       | {'K01897'}                                                                       | M00086 |
| GCA_946404095.1_SRR12081303_bin.66_metaWRAP_v1.3_MAG_genomic       | {'K00625', 'K00925'}                                                             | M00579 |
| GCA_017510385.1                                                    | {'K15633', 'K00927', 'K01689', 'K01803', 'K00134', 'K00873'}                     | M00002 |
| GCA_017510385.1                                                    | {'K00625', 'K00925'}                                                             | M00579 |
| R0170300311_tooth_RAH.megahit.bin.92                               | {'K00927', 'K01689', 'K01803', 'K00134', 'K00873'}                               | M00002 |
| R0170300269_tooth_RAH.megahit.bin.29                               | {'K15633', 'K00927', 'K01689', 'K01803', 'K00134', 'K00873'}                     | M00002 |
| R0170300269_tooth_RAH.megahit.bin.29                               | {'K02108', 'K02115', 'K02110', 'K02113', 'K02109', 'K02112', 'K02111', 'K02114'} | M00157 |
| R0170300271_tooth_RAH.megahit.bin.97                               | {'K01834', 'K01689', 'K00873'}                                                   | M00002 |
| R0170300271_tooth_RAH.megahit.bin.97                               | {'K02108', 'K02109', 'K02112', 'K02111', 'K02115', 'K02110', 'K02114'}           | M00157 |
| GCA_903883035.1_freshwater_MAG_---_Umea_bin-05361_genomic          | {'K00927', 'K15634', 'K01803', 'K00134', 'K00873'}                               | M00002 |
| GCA_903883035.1_freshwater_MAG_---_Umea_bin-05361_genomic          | {'K02108', 'K02115', 'K02110', 'K02113', 'K02109', 'K02112', 'K02111', 'K02114'} | M00157 |
| GCA_903883035.1_freshwater_MAG_---_Umea_bin-05361_genomic          | {'K02298', 'K02300', 'K02297', 'K02299'}                                         | M00417 |
| RSZYD18187537_A_saliva.metaspades.bin.34                           | {'K01834', 'K00927', 'K01689', 'K01803', 'K00134', 'K00873'}                     | M00002 |
| RSZAXPI002460-93_2_RAH_saliva.metaspades.bin.39                    | {'K01834', 'K01689', 'K01803', 'K00134', 'K00873'}                               | M00002 |
| RSZAXPI002470-105_RAH_saliva.metaspades.bin.14                     | {'K01834', 'K00927', 'K01689', 'K01803', 'K00134', 'K00873'}                     | M00002 |
| RSZAXPI002470-105_RAH_saliva.metaspades.bin.14                     | {'K02108', 'K02115', 'K02110', 'K02113', 'K02109', 'K02112', 'K02111', 'K02114'} | M00157 |
| SZAXPI018178-34_RA_dental.metaspades.bin.52                        | {'K01834', 'K00927', 'K01689', 'K01803', 'K00134', 'K00873'}                     | M00002 |
| YS000685_saliva.spades.bin.9                                       | {'K01834', 'K00927', 'K01689', 'K01803', 'K00134', 'K00873'}                     | M00002 |
| YS000685_saliva.spades.bin.9                                       | {'K02108', 'K02115', 'K02110', 'K02113', 'K02109', 'K02112', 'K02111', 'K02114'} | M00157 |
| R0170300170_tooth_RA.megahit.bin.136                               | {'K01834', 'K00927', 'K01689', 'K01803', 'K00134', 'K00873'}                     | M00002 |
| GCA_025449905.1_ASM2544990v1_genomic                               | {'K00927', 'K01803', 'K00134', 'K00873'}                                         | M00002 |
| GCA_025449905.1_ASM2544990v1_genomic                               | {'K02108', 'K02109', 'K02110', 'K02113'}                                         | M00157 |
| RSZYD18078768_A_saliva.metaspades.bin.28                           | {'K01689', 'K00927', 'K01803', 'K00873'}                                         | M00002 |
| RSZYD18078768_A_saliva.metaspades.bin.28                           | {'K02108', 'K02109', 'K02111', 'K02115', 'K02110', 'K02113'}                     | M00157 |
| RDPYD18300388_A_saliva.metaspades.bin.27                           | {'K01834', 'K00927', 'K01689', 'K01803', 'K00134', 'K00873'}                     | M00002 |
| RDPYD18300388_A_saliva.metaspades.bin.27                           | {'K02108', 'K02115', 'K02110', 'K02113', 'K02109', 'K02112', 'K02111', 'K02114'} | M00157 |
| SZAXPI018435-88_RA_saliva.metaspades.bin.58                        | {'K01834', 'K00927', 'K01689', 'K01803', 'K00134', 'K00873'}                     | M00002 |
| GCA_003537595.1_ASM353759v1_genomic                                | {'K00927', 'K01803', 'K00134', 'K00873'}                                         | M00002 |
| GCA_003537595.1_ASM353759v1_genomic                                | {'K02108', 'K02109', 'K02112', 'K02111', 'K02115', 'K02110', 'K02114'}           | M00157 |
| GCA_003537595.1_ASM353759v1_genomic                                | {'K02298', 'K02300', 'K02297', 'K02299'}                                         | M00417 |
| SZAXPI018287-129_RA_dental.metaspades.bin.24                       | {'K01834', 'K01689', 'K00873'}                                                   | M00002 |
| SZAXPI018287-129_RA_dental.metaspades.bin.24                       | {'K02108', 'K02115', 'K02110', 'K02113', 'K02109', 'K02112', 'K02111', 'K02114'} | M00157 |
| SZAXPI018182-39_RA_dental.metaspades.bin.37                        | {'K00927', 'K01689', 'K01803', 'K00134', 'K00873'}                               | M00002 |
| YS000411_saliva.spades.bin.13                                      | {'K01834', 'K00927', 'K01689', 'K01803', 'K00134', 'K00873'}                     | M00002 |
| YS000411_saliva.spades.bin.13                                      | {'K02108', 'K02115', 'K02110', 'K02113', 'K02109', 'K02112', 'K02111', 'K02114'} | M00157 |
| SRR6748160.metaspades.bin.6                                        | {'K01834', 'K00927', 'K01689', 'K01803', 'K00134', 'K00873'}                     | M00002 |
| SRR6748160.metaspades.bin.6                                        | {'K02108', 'K02115', 'K02110', 'K02113', 'K02109', 'K02112', 'K02111', 'K02114'} | M00157 |
| RDPYD18189858_A_saliva.metaspades.bin.8                            | {'K01834', 'K00927', 'K01689', 'K01803', 'K00134', 'K00873'}                     | M00002 |
| RDPYD18189858_A_saliva.metaspades.bin.8                            | {'K02108', 'K02109', 'K02111', 'K02115', 'K02110', 'K02113'}                     | M00157 |
| YS000131_saliva.spades.bin.17                                      | {'K01834', 'K00927', 'K01689', 'K01803', 'K00134', 'K00873'}                     | M00002 |
| YS000131_saliva.spades.bin.17                                      | {'K02108', 'K02115', 'K02110', 'K02113', 'K02109', 'K02112', 'K02111', 'K02114'} | M00157 |
| RDPYD18189914_A_saliva.metaspades.bin.11                           | {'K01834', 'K00927', 'K01689', 'K01803', 'K00134', 'K00873'}                     | M00002 |
| RDPYD18189914_A_saliva.metaspades.bin.11                           | {'K02108', 'K02115', 'K02110', 'K02113', 'K02109', 'K02112', 'K02111', 'K02114'} | M00157 |
| RSZAXPI002657-17_RA_dental.metaspades.bin.42                       | {'K01834', 'K01689', 'K01803', 'K00134', 'K00873'}                               | M00002 |
| RSZAXPI002657-17_RA_dental.metaspades.bin.42                       | {'K02108', 'K02115', 'K02110', 'K02113', 'K02109', 'K02112', 'K02111', 'K02114'} | M00157 |
| R0170300294_tooth_RAH.megahit.bin.12                               | {'K15633', 'K00927', 'K01689', 'K01803', 'K00134', 'K00873'}                     | M00002 |
| R0170300294_tooth_RAH.megahit.bin.12                               | {'K00625', 'K00925'}                                                             | M00579 |
| YS001151_saliva.spades.bin.14                                      | {'K01834', 'K00927', 'K01689', 'K01803', 'K00134', 'K00873'}                     | M00002 |
| YS001151_saliva.spades.bin.14                                      | {'K02108', 'K02115', 'K02110', 'K02113', 'K02109', 'K02112', 'K02111', 'K02114'} | M00157 |
| R0170300293_tooth_RAH.megahit.bin.36                               | {'K01834', 'K01689', 'K01803', 'K00134', 'K00873'}                               | M00002 |
| R0170300293_tooth_RAH.megahit.bin.36                               | {'K02108', 'K02115', 'K02110', 'K02113', 'K02109', 'K02112', 'K02111', 'K02114'} | M00157 |
| GCA_017406985.1                                                    | {'K15633', 'K00927', 'K01689', 'K01803', 'K00134', 'K00873'}                     | M00002 |
| GCA_017406985.1                                                    | {'K00625', 'K00925'}                                                             | M00579 |
| R0170300327_tooth_RA.megahit.bin.5                                 | {'K15633', 'K00927', 'K01689', 'K01803', 'K00134', 'K00873'}                     | M00002 |
| R0170300327_tooth_RA.megahit.bin.5                                 | {'K00625', 'K00925'}                                                             | M00579 |
| GCA_947304135.1_SRR10912535_bin.47_metaWRAP_v1.3_MAG_genomic       | {'K15633', 'K00927', 'K01689', 'K01803', 'K00134', 'K00873'}                     | M00002 |
| GCA_947304135.1_SRR10912535_bin.47_metaWRAP_v1.3_MAG_genomic       | {'K01897'}                                                                       | M00086 |
| GCA_947304135.1_SRR10912535_bin.47_metaWRAP_v1.3_MAG_genomic       | {'K00625', 'K00925'}                                                             | M00579 |
| RSZYD18187124_A_saliva.metaspades.bin.16                           | {'K01834', 'K00927', 'K01689', 'K01803', 'K00134', 'K00873'}                     | M00002 |
| R0170300261_tooth_RAH.megahit.bin.18                               | {'K01834', 'K00927', 'K01803', 'K00134', 'K00873'}                               | M00002 |
| R0170300261_tooth_RAH.megahit.bin.18                               | {'K02108', 'K02109', 'K02112', 'K02111', 'K02115', 'K02110', 'K02114'}           | M00157 |
| R0170300120_tooth_RA.megahit.bin.14                                | {'K15633', 'K00927', 'K01689', 'K01803', 'K00134', 'K00873'}                     | M00002 |
| R0170300120_tooth_RA.megahit.bin.14                                | {'K02108', 'K02115', 'K02110', 'K02113', 'K02109', 'K02112', 'K02111', 'K02114'} | M00157 |
| RDPYD18201694_A_saliva.metaspades.bin.10                           | {'K01834', 'K00927', 'K01689', 'K01803', 'K00134', 'K00873'}                     | M00002 |
| RDPYD18201694_A_saliva.metaspades.bin.10                           | {'K02108', 'K02115', 'K02110', 'K02113', 'K02109', 'K02112', 'K02111', 'K02114'} | M00157 |
| R0170300152_tooth_RA.megahit.bin.80                                | {'K00927', 'K01689', 'K01803', 'K00134', 'K00873'}                               | M00002 |
| R0170300152_tooth_RA.megahit.bin.80                                | {'K02108', 'K02115', 'K02110', 'K02113', 'K02109', 'K02112', 'K02111', 'K02114'} | M00157 |
| GCA_024682595.1_ASM2468259v1_genomic                               | {'K15633', 'K00927', 'K01689', 'K01803', 'K00134', 'K00873'}                     | M00002 |
| GCA_024682595.1_ASM2468259v1_genomic                               | {'K01897'}                                                                       | M00086 |
| GCA_024682595.1_ASM2468259v1_genomic                               | {'K00925', 'K00625', 'K13788'}                                                   | M00579 |
| GCA_016866755.1_JGI_2017-08-21_genomic                             | {'K00927', 'K01689', 'K01803', 'K00134', 'K00873'}                               | M00002 |
| GCA_016866755.1_JGI_2017-08-21_genomic                             | {'K02108', 'K02115', 'K02110', 'K02113', 'K02109', 'K02112', 'K02111', 'K02114'} | M00157 |
| RSZAXPI002455-75_RAH_dental.metaspades.bin.27                      | {'K01834', 'K00927', 'K01689', 'K01803', 'K00134', 'K00873'}                     | M00002 |
| GCA_903831735.1_freshwater_MAG_---_AlinenLipids_bin-2074_genomic   | {'K00927', 'K01803', 'K00134', 'K00873'}                                         | M00002 |
| GCA_903831735.1_freshwater_MAG_---_AlinenLipids_bin-2074_genomic   | {'K02108', 'K02115', 'K02110', 'K02113', 'K02109', 'K02112', 'K02111', 'K02114'} | M00157 |
| GCA_903831735.1_freshwater_MAG_---_AlinenLipids_bin-2074_genomic   | {'K02298', 'K02300', 'K02297', 'K02299'}                                         | M00417 |
| RSZYD18078749_A_saliva.metaspades.bin.36                           | {'K01834', 'K00927', 'K01689', 'K01803', 'K00134', 'K00873'}                     | M00002 |
| RSZYD18078749_A_saliva.metaspades.bin.36                           | {'K02108', 'K02115', 'K02110', 'K02113', 'K02109', 'K02112', 'K02111', 'K02114'} | M00157 |
| YS000007_saliva.spades.bin.7                                       | {'K01834', 'K00927', 'K01689', 'K01803', 'K00873'}                               | M00002 |
| YS000007_saliva.spades.bin.7                                       | {'K02108', 'K02115', 'K02110', 'K02113', 'K02109', 'K02112', 'K02111', 'K02114'} | M00157 |



|                                                                   |                                                                           |        |
|-------------------------------------------------------------------|---------------------------------------------------------------------------|--------|
| GCA_025928155.1_ASM2592815v1_genomic                              | {'K01834','K00927','K15634','K01803','K00134','K00873'}                   | M00002 |
| GCA_025928155.1_ASM2592815v1_genomic                              | {'K02108','K02115','K02110','K02113','K02109','K02112','K02111','K02114'} | M00157 |
| GCA_025928155.1_ASM2592815v1_genomic                              | {'K02298','K02300','K02297','K02299'}                                     | M00417 |
| GCA_903918245.1_freshwater_MAG_---_AM-lipid-01-D1_bin-099_genomic | {'K02108','K02109','K02112','K02111','K02115','K02110','K02114'}          | M00157 |
| GCA_903918245.1_freshwater_MAG_---_AM-lipid-01-D1_bin-099_genomic | {'K02300','K02297','K02299'}                                              | M00417 |
| RDPYD18189879_A_saliva.metaspades.bin.66                          | {'K01834','K00927','K01689','K01803','K00134','K00873'}                   | M00002 |
| RDPYD18189879_A_saliva.metaspades.bin.66                          | {'K02108','K02115','K02110','K02113','K02109','K02112','K02111','K02114'} | M00157 |
| GCA_024699125.1_ASM2469912v1_genomic                              | {'K15633','K00927','K01689','K01803','K00134','K00873'}                   | M00002 |
| GCA_024699125.1_ASM2469912v1_genomic                              | {'K01897'}                                                                | M00086 |
| YS000257_saliva.spades.bin.31                                     | {'K01834','K00927','K01689','K01803','K00134','K00873'}                   | M00002 |
| GCA_017652105.1_ASM1765210v1_genomic                              | {'K15633','K00927','K01689','K01803','K00134','K00873'}                   | M00002 |
| GCA_017652105.1_ASM1765210v1_genomic                              | {'K01897'}                                                                | M00086 |
| GCA_027427835.1_ASM2742783v1_genomic                              | {'K00927','K01803','K00134','K00873'}                                     | M00002 |
| GCA_027427835.1_ASM2742783v1_genomic                              | {'K02108','K02115','K02110','K02113','K02109','K02112','K02111','K02114'} | M00157 |
| GCA_027427835.1_ASM2742783v1_genomic                              | {'K02298','K02300','K02297','K02299'}                                     | M00417 |
| RSZYD18187514_A_saliva.metaspades.bin.23                          | {'K01834','K00927','K01689','K01803','K00134','K00873'}                   | M00002 |
| RSZYD18187514_A_saliva.metaspades.bin.23                          | {'K02108','K02115','K02110','K02113','K02109','K02112','K02111','K02114'} | M00157 |
| RSZYD18187666_A_saliva.metaspades.bin.39                          | {'K01834','K00927','K01689','K01803','K00134','K00873'}                   | M00002 |
| RSZYD18187203_A_saliva.metaspades.bin.7                           | {'K01834','K00927','K01689','K01803','K00134','K00873'}                   | M00002 |
| RSZYD18187203_A_saliva.metaspades.bin.7                           | {'K02108','K02115','K02110','K02113','K02109','K02112','K02111','K02114'} | M00157 |
| RSZYD18187663_A_saliva.metaspades.bin.60                          | {'K01834','K00927','K01689','K01803','K00134','K00873'}                   | M00002 |
| SZAXPI018103-24_RA_dental.metaspades.bin.45                       | {'K15633','K00927','K01689','K01803','K00134','K00873'}                   | M00002 |
| SZAXPI018103-24_RA_dental.metaspades.bin.45                       | {'K00625','K00925'}                                                       | M00579 |
| R0170300279_tooth_RAH.megahit.bin.93                              | {'K01834','K00927','K01689','K01803','K00134','K00873'}                   | M00002 |
| RSZAXPI002331-56_RAH_dental.metaspades.bin.80                     | {'K00927','K01689','K01803','K00134','K00873'}                            | M00002 |
| R0170300278_tooth_RAH.megahit.bin.14                              | {'K15633','K00927','K01689','K01803','K00134','K00873'}                   | M00002 |
| R0170300278_tooth_RAH.megahit.bin.14                              | {'K02108','K02115','K02110','K02113','K02109','K02112','K02111','K02114'} | M00157 |
| R0170300279_tooth_RAH.megahit.bin.30                              | {'K01834','K00927','K01689','K01803','K00134','K00873'}                   | M00002 |
| GCA_017533605.1_ASM1753360v1_genomic                              | {'K15633','K00927','K01689','K01803','K00134','K00873'}                   | M00002 |
| GCA_017533605.1_ASM1753360v1_genomic                              | {'K01897'}                                                                | M00086 |
| GCA_017533605.1_ASM1753360v1_genomic                              | {'K00625','K00925'}                                                       | M00579 |
| GCA_027427475.1_ASM2742747v1_genomic                              | {'K00927','K01803','K00134','K00873'}                                     | M00002 |
| GCA_027427475.1_ASM2742747v1_genomic                              | {'K02108','K02109','K02112','K02111','K02115','K02110','K02114'}          | M00157 |
| GCA_027427475.1_ASM2742747v1_genomic                              | {'K02298','K02300','K02297','K02299'}                                     | M00417 |
| R0170300281_tooth_RAH.megahit.bin.27                              | {'K15633','K00927','K01689','K01803','K00134','K00873'}                   | M00002 |
| R0170300281_tooth_RAH.megahit.bin.27                              | {'K00625','K00925'}                                                       | M00579 |
| RSZAXPI002313-22_RAH_dental.metaspades.bin.34                     | {'K01834','K00927','K01689','K01803','K00134','K00873'}                   | M00002 |
| RSZAXPI002313-22_RAH_dental.metaspades.bin.34                     | {'K00625','K00925'}                                                       | M00579 |
| SZAXPI018096-17_RA_dental.metaspades.bin.59                       | {'K15633','K00927','K01689','K01803','K00134','K00873'}                   | M00002 |
| SZAXPI018096-17_RA_dental.metaspades.bin.59                       | {'K02108','K02115','K02110','K02113','K02109','K02112','K02111','K02114'} | M00157 |
| R0170300161_tooth_RA.megahit.bin.158                              | {'K15633','K00927','K01689','K01803','K00134','K00873'}                   | M00002 |
| R0170300161_tooth_RA.megahit.bin.158                              | {'K00625','K00925'}                                                       | M00579 |
| SZAXPI018281-102_RA_dental.metaspades.bin.20                      | {'K01834','K01689','K00873'}                                              | M00002 |
| SZAXPI018281-102_RA_dental.metaspades.bin.20                      | {'K02108','K02115','K02110','K02113','K02109','K02112','K02111','K02114'} | M00157 |
| SZAXPI018397-37_RA_saliva.metaspades.bin.28                       | {'K01834','K00927','K01689','K01803','K00134','K00873'}                   | M00002 |
| RDPYD18300134_A_saliva.metaspades.bin.113                         | {'K01834','K00927','K01689','K01803','K00134','K00873'}                   | M00002 |
| GCA_019662065.1_ASM1966206v1_genomic                              | {'K02108','K02115','K02110','K02113','K02109','K02112','K02111','K02114'} | M00157 |
| GCA_019662065.1_ASM1966206v1_genomic                              | {'K02298','K02297','K02299'}                                              | M00417 |
| R0170300169_tooth_RA.megahit.bin.51                               | {'K15633','K00927','K01689','K01803','K00134','K00873'}                   | M00002 |
| R0170300169_tooth_RA.megahit.bin.51                               | {'K02108','K02115','K02110','K02113','K02109','K02112','K02111','K02114'} | M00157 |
| R0170300157_tooth_RA.megahit.bin.74                               | {'K01834','K01689','K01803','K00134','K00873'}                            | M00002 |
| R0170300157_tooth_RA.megahit.bin.74                               | {'K02108','K02115','K02110','K02113','K02109','K02112','K02111','K02114'} | M00157 |
| GCA_027427255.1_ASM2742725v1_genomic                              | {'K00927','K01803','K00134','K00873'}                                     | M00002 |
| GCA_027427255.1_ASM2742725v1_genomic                              | {'K02108','K02115','K02110','K02113','K02109','K02112','K02111','K02114'} | M00157 |
| YS000722_saliva.spades.bin.22                                     | {'K01834','K00927','K01689','K01803','K00134','K00873'}                   | M00002 |
| YS000722_saliva.spades.bin.22                                     | {'K02108','K02115','K02110','K02113','K02109','K02112','K02111','K02114'} | M00157 |
| GCA_022819345.1_ASM2281934v1_genomic                              | {'K01834','K00927','K01689','K01803','K00134','K00873'}                   | M00002 |
| GCA_022819345.1_ASM2281934v1_genomic                              | {'K02108','K02115','K02110','K02113','K02109','K02112','K02111','K02114'} | M00157 |
| R0170300120_tooth_RA.megahit.bin.52                               | {'K01834','K00927','K01689','K01803','K00134','K00873'}                   | M00002 |
| GCA_017430785.1                                                   | {'K15633','K00927','K01689','K01803','K00134','K00873'}                   | M00002 |
| GCA_017430785.1                                                   | {'K01897'}                                                                | M00086 |
| R0170300152_tooth_RA.megahit.bin.50                               | {'K15633','K00927','K01689','K01803','K00134','K00873'}                   | M00002 |
| R0170300152_tooth_RA.megahit.bin.50                               | {'K02108','K02112','K02111','K02115','K02110','K02113','K02114'}          | M00157 |
| GCA_013333515.2_ASM1333351v2_genomic                              | {'K01834','K00927','K01689','K01803','K00134','K00873'}                   | M00002 |
| GCA_009994745.1_ASM999474v1_genomic                               | {'K02108','K02115','K02110','K02113','K02109','K02112','K02111','K02114'} | M00157 |
| R0170300271_tooth_RAH.megahit.bin.84                              | {'K15633','K00927','K01689','K01803','K00134','K00873'}                   | M00002 |
| R0170300271_tooth_RAH.megahit.bin.84                              | {'K00625','K00925'}                                                       | M00579 |
| RSZYD18187614_A_saliva.metaspades.bin.13                          | {'K01834','K01689','K01803','K00134','K00873'}                            | M00002 |
| R0170300287_tooth_RAH.megahit.bin.150                             | {'K15633','K00927','K01689','K01803','K00134','K00873'}                   | M00002 |
| R0170300287_tooth_RAH.megahit.bin.150                             | {'K00625','K00925'}                                                       | M00579 |
| RSZYD18078609_A_saliva.metaspades.bin.12                          | {'K01834','K00927','K01689','K01803','K00134','K00873'}                   | M00002 |
| RSZYD18078609_A_saliva.metaspades.bin.12                          | {'K02108','K02115','K02110','K02113','K02109','K02112','K02111','K02114'} | M00157 |
| GCA_018062785.1_ASM1806278v1_genomic                              | {'K00927','K15634','K01803','K00134','K00873'}                            | M00002 |
| GCA_018062785.1_ASM1806278v1_genomic                              | {'K02108','K02115','K02110','K02113','K02109','K02112','K02111','K02114'} | M00157 |
| GCA_018062785.1_ASM1806278v1_genomic                              | {'K02298','K02300','K02297','K02299'}                                     | M00417 |
| SRR8114041.metaspades.bin.6                                       | {'K01834','K00927','K01689','K01803','K00134','K00873'}                   | M00002 |
| SRR8114041.metaspades.bin.6                                       | {'K02108','K02115','K02110','K02113','K02109','K02112','K02111','K02114'} | M00157 |
| SRR6748185.metaspades.bin.21                                      | {'K01834','K00927','K01689','K01803','K00134','K00873'}                   | M00002 |
| SRR6748185.metaspades.bin.21                                      | {'K02108','K02115','K02110','K02113','K02109','K02112','K02111','K02114'} | M00157 |
| RDPYD18088805_A_saliva.metaspades.bin.25                          | {'K01834','K00927','K01689','K01803','K00134','K00873'}                   | M00002 |
| RSZAXPI002315-24_RAH_dental.metaspades.bin.62                     | {'K00927','K01689','K01803','K00134','K00873'}                            | M00002 |
| RSZAXPI002315-24_RAH_dental.metaspades.bin.62                     | {'K02108','K02115','K02110','K02113','K02109','K02112','K02111','K02114'} | M00157 |
| GCA_016234585.1_ASM1623458v1_genomic                              | {'K02108','K02115','K02110','K02113','K02109','K02112','K02111','K02114'} | M00157 |
| R0170300136_tooth_RA.megahit.bin.20                               | {'K15633','K00927','K01689','K01803','K00134','K00873'}                   | M00002 |
| R0170300136_tooth_RA.megahit.bin.20                               | {'K02108','K02115','K02110','K02113','K02109','K02112','K02111','K02114'} | M00157 |
| GCA_946480535.1_SRR873609_bin.132_metaWRAP_v1.3_MAG_genomic       | {'K15633','K00927','K01689','K00134','K00873'}                            | M00002 |
| GCA_946480535.1_SRR873609_bin.132_metaWRAP_v1.3_MAG_genomic       | {'K01897'}                                                                | M00086 |
| R0170300198_tooth_RA.megahit.bin.28                               | {'K01834','K00927','K01689','K01803','K00134','K00873'}                   | M00002 |
| R0170300198_tooth_RA.megahit.bin.28                               | {'K02108','K02109','K02112','K02111','K02115','K02110','K02114'}          | M00157 |
| YS000604_saliva.spades.bin.11                                     | {'K01834','K00927','K01689','K01803','K00134','K00873'}                   | M00002 |
| YS000604_saliva.spades.bin.11                                     | {'K02108','K02109','K02112','K02110','K02113','K02114'}                   | M00157 |
| R0170300189_tooth_RA.megahit.bin.69                               | {'K01834','K00927','K01689','K01803','K00134','K00873'}                   | M00002 |
| R0170300189_tooth_RA.megahit.bin.69                               | {'K02108','K02109','K02112','K02111','K02115','K02110','K02114'}          | M00157 |
| GCA_004136275.1_ASM413627v1_genomic                               | {'K01834','K00927','K01689','K01803','K00134','K00873'}                   | M00002 |
| GCA_004136275.1_ASM413627v1_genomic                               | {'K01897'}                                                                | M00086 |
| GCA_946480535.1_SRR14536364_bin.32_metawrap_v1.3.0_MAG_genomic    | {'K00927','K01803','K00134','K00873'}                                     | M00002 |
| GCA_946480535.1_SRR14536364_bin.32_metawrap_v1.3.0_MAG_genomic    | {'K02109','K02112','K02111','K02115','K02110','K02113','K02114'}          | M00157 |
| GCA_946480535.1_SRR14536364_bin.32_metawrap_v1.3.0_MAG_genomic    | {'K02298','K02300','K02297','K02299'}                                     | M00417 |
| GCA_013098515.1_ASM1309851v1_genomic                              | {'K01834','K00927','K01689','K01803','K00134','K00873'}                   | M00002 |
| GCA_013098515.1_ASM1309851v1_genomic                              | {'K02108','K02109','K02112','K02111','K02115','K02110','K02114'}          | M00157 |
| GCA_017421325.1                                                   | {'K00927','K01689','K01803','K00134','K00873'}                            | M00002 |
| GCA_017421325.1                                                   | {'K01897'}                                                                | M00086 |
| GCA_017421325.1                                                   | {'K00625','K00925'}                                                       | M00579 |
| R0170300276_tooth_RAH.megahit.bin.19                              | {'K15633','K00927','K01689','K01803','K00873'}                            | M00002 |
| R0170300276_tooth_RAH.megahit.bin.19                              | {'K02108','K02115','K02110','K02113','K02109','K02112','K02111','K02114'} | M00157 |

|                                                              |                                                                           |        |
|--------------------------------------------------------------|---------------------------------------------------------------------------|--------|
| RSZYD18187920_A_saliva.metaspades.bin.29                     | {'K01834','K00927','K01689','K01803','K00134','K00873'}                   | M00002 |
| RSZYD18187920_A_saliva.metaspades.bin.29                     | {'K02108','K02115','K02110','K02113','K02109','K02112','K02111','K02114'} | M00157 |
| YS000202_saliva.spades.bin.16                                | {'K01834','K00927','K01689','K01803','K00134','K00873'}                   | M00002 |
| YS000202_saliva.spades.bin.16                                | {'K02108','K02115','K02110','K02113','K02109','K02112','K02111','K02114'} | M00157 |
| R0170300092_tooth_RA.megahit.bin.69                          | {'K01834','K00927','K01689','K01803','K00134','K00873'}                   | M00002 |
| R0170300092_tooth_RA.megahit.bin.69                          | {'K02108','K02115','K02110','K02113','K02109','K02112','K02111','K02114'} | M00157 |
| YS000063_saliva.spades.bin.11                                | {'K01834','K00927','K01689','K01803','K00134','K00873'}                   | M00002 |
| YS000063_saliva.spades.bin.11                                | {'K02108','K02115','K02110','K02113','K02109','K02112','K02111','K02114'} | M00157 |
| RSZAXPI002471-106_2_RAH_saliva.metaspades.bin.25             | {'K01834','K00927','K01689','K01803','K00134','K00873'}                   | M00002 |
| RSZAXPI002471-106_2_RAH_saliva.metaspades.bin.25             | {'K02108','K02115','K02110','K02113','K02109','K02112','K02111','K02114'} | M00157 |
| RSZYD18078202_A_saliva.metaspades.bin.4                      | {'K01834','K00927','K01689','K01803','K00134','K00873'}                   | M00002 |
| RSZYD18078202_A_saliva.metaspades.bin.4                      | {'K02108','K02115','K02110','K02113','K02109','K02112','K02111','K02114'} | M00157 |
| R0170300270_tooth_RAH.megahit.bin.32                         | {'K00927','K01689','K01803','K00134','K00873'}                            | M00002 |
| YS000361_saliva.spades.bin.9                                 | {'K01834','K00927','K01689','K01803','K00134','K00873'}                   | M00002 |
| YS000361_saliva.spades.bin.9                                 | {'K02108','K02115','K02110','K02113','K02109','K02112','K02111','K02114'} | M00157 |
| RDPYD18088813_A_saliva.metaspades.bin.37                     | {'K01834','K00927','K01689','K01803','K00134','K00873'}                   | M00002 |
| GCA_947389435.1_SRR15214583_bin.47_metawrap_v1.3_MAG_genomic | {'K15633','K00927','K01689','K01803','K00134','K00873'}                   | M00002 |
| GCA_947389435.1_SRR15214583_bin.47_metawrap_v1.3_MAG_genomic | {'K00625','K00925'}                                                       | M00579 |
| GCA_016700375.1_ASM1670037v1_genomic                         | {'K00927','K01689','K01803','K00134','K00873'}                            | M00002 |
| GCA_016700375.1_ASM1670037v1_genomic                         | {'K02108','K02115','K02110','K02113','K02109','K02112','K02111','K02114'} | M00157 |
| GCA_016700375.1_ASM1670037v1_genomic                         | {'K02298','K02300','K02297','K02299'}                                     | M00417 |
| R0170300120_tooth_RA.megahit.bin.80                          | {'K15633','K00927','K01689','K01803','K00134','K00873'}                   | M00002 |
| R0170300120_tooth_RA.megahit.bin.80                          | {'K00625','K00925'}                                                       | M00579 |
| GCA_017447485.1                                              | {'K15633','K00927','K01689','K01803','K00134','K00873'}                   | M00002 |
| GCA_017447485.1                                              | {'K01897'}                                                                | M00086 |
| GCA_017447485.1                                              | {'K00625','K00925'}                                                       | M00579 |
| GCA_017459845.1                                              | {'K15633','K00927','K15634','K01689','K01803','K00134','K00873'}          | M00002 |
| GCA_017459845.1                                              | {'K01897'}                                                                | M00086 |
| SZAXPI018291-142_RA_dental.metaspades.bin.25                 | {'K00927','K01689','K01803','K00134','K00873'}                            | M00002 |
| SZAXPI018291-142_RA_dental.metaspades.bin.25                 | {'K02108','K02115','K02110','K02113','K02109','K02112','K02111','K02114'} | M00157 |
| R0170300254_tooth_RAH.megahit.bin.48                         | {'K15633','K00927','K01689','K01803','K00134','K00873'}                   | M00002 |
| R0170300254_tooth_RAH.megahit.bin.48                         | {'K00625','K00925'}                                                       | M00579 |
| R0170300135_tooth_RA.megahit.bin.82                          | {'K01834','K01689','K00873'}                                              | M00002 |
| R0170300135_tooth_RA.megahit.bin.82                          | {'K02108','K02109','K02111','K02115','K02110','K02113','K02114'}          | M00157 |
| GCA_017404795.1                                              | {'K15633','K01689','K01803','K00134'}                                     | M00002 |
| GCA_017404795.1                                              | {'K01897'}                                                                | M00086 |
| GCA_947057165.1_ERR9465706_bin.42_metawrap_v1.3_MAG_genomic  | {'K15633','K00927','K01689','K01803','K00134','K00873'}                   | M00002 |
| R0170300378_saliva_RAH.megahit.bin.36                        | {'K15633','K00927','K01689','K01803','K00134','K00873'}                   | M00002 |
| R0170300378_saliva_RAH.megahit.bin.36                        | {'K00625','K00925'}                                                       | M00579 |
| SZAXPI018287-129_RA_dental.metaspades.bin.69                 | {'K00927','K01689','K01803','K00134','K00873'}                            | M00002 |
| SZAXPI018287-129_RA_dental.metaspades.bin.69                 | {'K02108','K02115','K02110','K02113','K02109','K02112','K02111','K02114'} | M00157 |
| GCA_017514025.1                                              | {'K15633','K00927','K01689','K01803','K00134','K00873'}                   | M00002 |
| GCA_017514025.1                                              | {'K01897'}                                                                | M00086 |
| GCA_017514025.1                                              | {'K00925','K00625','K13788'}                                              | M00579 |
| RDPYD18300371_A_saliva.metaspades.bin.29                     | {'K01834','K00927','K01689','K01803','K00134','K00873'}                   | M00002 |
| RDPYD18300371_A_saliva.metaspades.bin.29                     | {'K02108','K02109','K02110','K02113','K02114'}                            | M00157 |
| GCA_017510425.1                                              | {'K15633','K00927','K01689','K01803','K00134','K00873'}                   | M00002 |
| GCA_017510425.1                                              | {'K01897'}                                                                | M00086 |
| GCA_017510425.1                                              | {'K00925','K13788'}                                                       | M00579 |
| GCA_002792275.1_ASM279227v1_genomic                          | {'K02108','K02109','K02112','K02111','K02115','K02110','K02114'}          | M00157 |
| GCA_002792275.1_ASM279227v1_genomic                          | {'K02298','K02300','K02297','K02299'}                                     | M00417 |
| GCA_016187125.1_ASM1618712v1_genomic                         | {'K15634','K00927','K01803','K00134'}                                     | M00002 |
| GCA_016187125.1_ASM1618712v1_genomic                         | {'K02108','K02115','K02110','K02113','K02109','K02112','K02111','K02114'} | M00157 |
| R0170300287_tooth_RAH.megahit.bin.130                        | {'K01834','K00927','K01689','K01803','K00134'}                            | M00002 |
| R0170300287_tooth_RAH.megahit.bin.130                        | {'K02108','K02115','K02110','K02113','K02109','K02112','K02111','K02114'} | M00157 |
| R0170300223_tooth_RA.megahit.bin.80                          | {'K15633','K01689','K01803','K00134','K00873'}                            | M00002 |
| R0170300223_tooth_RA.megahit.bin.80                          | {'K00625','K00925'}                                                       | M00579 |
| RSZAXPI002620-35_RA_dental.metaspades.bin.36                 | {'K00927','K01689','K01803','K00134','K00873'}                            | M00002 |
| RSZAXPI002620-35_RA_dental.metaspades.bin.36                 | {'K02108','K02115','K02110','K02113','K02109','K02112','K02111','K02114'} | M00157 |
| GCA_017941835.1_ASM1794183v1_genomic                         | {'K15633','K00927','K01689','K00134','K00873'}                            | M00002 |
| GCA_017941835.1_ASM1794183v1_genomic                         | {'K01897'}                                                                | M00086 |
| GCA_017941835.1_ASM1794183v1_genomic                         | {'K00625','K00925'}                                                       | M00579 |
| R0170300065_tooth_RA.megahit.bin.77                          | {'K01834','K00927','K01689','K01803','K00134','K00873'}                   | M00002 |
| RSZYD18187004_A_saliva.metaspades.bin.5                      | {'K01834','K01689','K01803','K00134','K00873'}                            | M00002 |
| RSZYD18187004_A_saliva.metaspades.bin.5                      | {'K02108','K02115','K02110','K02113','K02109','K02112','K02111','K02114'} | M00157 |
| GCA_947427335.1_SRR18439536_bin.19_metawrap_v1.3_MAG_genomic | {'K15633','K00927','K01689','K01803','K00134','K00873'}                   | M00002 |
| GCA_947427335.1_SRR18439536_bin.19_metawrap_v1.3_MAG_genomic | {'K00925','K00625','K13788'}                                              | M00579 |
| R0170300097_tooth_RA.megahit.bin.57                          | {'K01834','K00927','K01689','K01803','K00134','K00873'}                   | M00002 |
| R0170300097_tooth_RA.megahit.bin.57                          | {'K02108','K02109','K02112','K02111','K02115','K02110','K02114'}          | M00157 |
| GCA_013333205.2_ASM1333320v2_genomic                         | {'K15633','K00927','K01689','K01803','K00134','K00873'}                   | M00002 |
| GCA_013333205.2_ASM1333320v2_genomic                         | {'K00625','K00925'}                                                       | M00579 |
| GCA_017619315.1_ASM1761931v1_genomic                         | {'K15633','K00927','K01689','K01803','K00134','K00873'}                   | M00002 |
| GCA_017619315.1_ASM1761931v1_genomic                         | {'K01897'}                                                                | M00086 |
| GCA_017619315.1_ASM1761931v1_genomic                         | {'K00625','K00925'}                                                       | M00579 |
| YS000385_saliva.spades.bin.1                                 | {'K01834','K00927','K01689','K01803','K00134','K00873'}                   | M00002 |
| YS000385_saliva.spades.bin.1                                 | {'K02108','K02115','K02110','K02113','K02109','K02112','K02111','K02114'} | M00157 |
| GCA_002792255.1_ASM279225v1_genomic                          | {'K02108','K02115','K02110','K02113','K02109','K02112','K02111','K02114'} | M00157 |
| RSZYD18187350_A_saliva.metaspades.bin.64                     | {'K15633','K00927','K01689','K01803','K00134'}                            | M00002 |
| RSZYD18187350_A_saliva.metaspades.bin.64                     | {'K00625','K00925'}                                                       | M00579 |
| R0170300192_tooth_RA.megahit.bin.38                          | {'K15633','K00927','K01689','K01803','K00134','K00873'}                   | M00002 |
| R0170300192_tooth_RA.megahit.bin.38                          | {'K00625','K00925'}                                                       | M00579 |
| GCA_001788555.1_ASM178855v1_genomic                          | {'K02108','K02115','K02110','K02113','K02109','K02112','K02111','K02114'} | M00157 |
| R0170300098_tooth_RA.megahit.bin.129                         | {'K01834','K01689','K01803','K00134','K00873'}                            | M00002 |
| R0170300098_tooth_RA.megahit.bin.129                         | {'K02108','K02115','K02110','K02113','K02109','K02112','K02111','K02114'} | M00157 |
| R0170300319_tooth_RAH.megahit.bin.124                        | {'K01834','K01689','K00873'}                                              | M00002 |
| R0170300319_tooth_RAH.megahit.bin.124                        | {'K02108','K02115','K02110','K02113','K02109','K02112','K02111','K02114'} | M00157 |
| RSZYD18078555_A_saliva.metaspades.bin.67                     | {'K01834','K00927','K01803','K00134','K00873'}                            | M00002 |
| YS000275_saliva.spades.bin.17                                | {'K01834','K00927','K01689','K01803','K00873'}                            | M00002 |
| YS000275_saliva.spades.bin.17                                | {'K02108','K02115','K02110','K02113','K02109','K02112','K02111','K02114'} | M00157 |
| RDPYD18300407_A_saliva.metaspades.bin.4                      | {'K01834','K00927','K01689','K01803','K00873'}                            | M00002 |
| RDPYD18300407_A_saliva.metaspades.bin.4                      | {'K02108','K02115','K02110','K02113','K02109','K02112','K02111','K02114'} | M00157 |
| SZAXPI018276-89_RA_dental.metaspades.bin.7                   | {'K00927','K01689','K01803','K00134','K00873'}                            | M00002 |
| SZAXPI018276-89_RA_dental.metaspades.bin.7                   | {'K02108','K02115','K02110','K02113','K02109','K02112','K02111','K02114'} | M00157 |
| R0170300271_tooth_RAH.megahit.bin.16                         | {'K15633','K00927','K01689','K01803','K00134','K00873'}                   | M00002 |
| R0170300271_tooth_RAH.megahit.bin.16                         | {'K00625','K00925'}                                                       | M00579 |
| GCA_021222645.1_ASM2122264v1_genomic                         | {'K01834','K00927','K01689','K01803','K00134','K00873'}                   | M00002 |
| GCA_021222645.1_ASM2122264v1_genomic                         | {'K02108','K02115','K02110','K02113','K02109','K02112','K02111','K02114'} | M00157 |
| SZAXPI018272-74_RA_dental.metaspades.bin.18                  | {'K00927','K01689','K01803','K00134','K00873'}                            | M00002 |
| SZAXPI018272-74_RA_dental.metaspades.bin.18                  | {'K02108','K02115','K02110','K02113','K02109','K02112','K02111','K02114'} | M00157 |
| R0170300137_tooth_RA.megahit.bin.10                          | {'K00927','K01689','K01803','K00134','K00873'}                            | M00002 |
| R0170300137_tooth_RA.megahit.bin.10                          | {'K02108','K02115','K02110','K02113','K02109','K02112','K02111','K02114'} | M00157 |
| RSZAXPI002305-14_RAH_dental.metaspades.bin.61                | {'K00927','K01689','K01803','K00134','K00873'}                            | M00002 |
| GCA_003246575.1_ASM324657v1_genomic                          | {'K01834','K00927','K01689','K01803','K00134','K00873'}                   | M00002 |
| GCA_003246575.1_ASM324657v1_genomic                          | {'K02108','K02115','K02110','K02113','K02109','K02112','K02111','K02114'} | M00157 |
| GCA_945872155.1_SRR15732359_bin.8_metaWRAP_v1.3_MAG_genomic  | {'K15633','K00927','K01689','K01803','K00134','K00873'}                   | M00002 |



|                                                               |                                                                                  |        |
|---------------------------------------------------------------|----------------------------------------------------------------------------------|--------|
| GCA_945872155.1_SRR15732359_bin.8_metaWRAP_v1.3_MAG_genomic   | {'K00625', 'K00925'}                                                             | M00579 |
| R0170300274_tooth_RAH.megahit.bin.32                          | {'K01834', 'K01689', 'K01803', 'K00134', 'K00873'}                               | M00002 |
| R0170300274_tooth_RAH.megahit.bin.32                          | {'K02108', 'K02115', 'K02110', 'K02113', 'K02109', 'K02112', 'K02111', 'K02114'} | M00157 |
| RSZYD18078259_A_saliva.metaspades.bin.16                      | {'K01834', 'K00927', 'K01689', 'K01803', 'K00134', 'K00873'}                     | M00002 |
| RSZYD18078259_A_saliva.metaspades.bin.16                      | {'K02108', 'K02109', 'K02112', 'K02111', 'K02110', 'K02113', 'K02114'}           | M00157 |
| RSZAXPI002324-37_RAH_dental.metaspades.bin.42                 | {'K01834', 'K00927', 'K01689', 'K01803', 'K00134', 'K00873'}                     | M00002 |
| RSZAXPI002324-37_RAH_dental.metaspades.bin.42                 | {'K02108', 'K02115', 'K02110', 'K02113', 'K02109', 'K02112', 'K02111', 'K02114'} | M00157 |
| GCA_946890675.1_ERR9530663_bin.14_metaWRAP_v1.3_MAG_genomic   | {'K01834', 'K00927', 'K01689', 'K01803', 'K00134', 'K00873'}                     | M00002 |
| GCA_946890675.1_ERR9530663_bin.14_metaWRAP_v1.3_MAG_genomic   | {'K01897'}                                                                       | M00086 |
| SZAXPI018453-13_RA_saliva.metaspades.bin.39                   | {'K15633', 'K00927', 'K01689', 'K01803', 'K00134', 'K00873'}                     | M00002 |
| RDPYD18088838_A_saliva.metaspades.bin.60                      | {'K01834', 'K00927', 'K01803', 'K00134', 'K00873'}                               | M00002 |
| RSZYD18187916_A_saliva.metaspades.bin.50                      | {'K01834', 'K00927', 'K01689', 'K01803', 'K00134', 'K00873'}                     | M00002 |
| RSZYD18187916_A_saliva.metaspades.bin.50                      | {'K02108', 'K02115', 'K02110', 'K02113', 'K02109', 'K02112', 'K02111', 'K02114'} | M00157 |
| GCA_002413865.1_ASM241386v1_genomic                           | {'K00927', 'K15634', 'K01803', 'K00134', 'K00873'}                               | M00002 |
| GCA_002413865.1_ASM241386v1_genomic                           | {'K02108', 'K02115', 'K02110', 'K02113', 'K02109', 'K02112', 'K02111', 'K02114'} | M00157 |
| GCA_002413865.1_ASM241386v1_genomic                           | {'K02298', 'K02300', 'K02297', 'K02299'}                                         | M00417 |
| GCA_946997535.1_SRR16916865_bin.12_metaWRAP_v1.3_MAG_genomic  | {'K01834', 'K00927', 'K01689', 'K01803', 'K00134', 'K00873'}                     | M00002 |
| GCA_946997535.1_SRR16916865_bin.12_metaWRAP_v1.3_MAG_genomic  | {'K01897'}                                                                       | M00086 |
| R0170300178_tooth_RA.megahit.bin.65                           | {'K01834', 'K01689', 'K01803', 'K00134', 'K00873'}                               | M00002 |
| R0170300178_tooth_RA.megahit.bin.65                           | {'K02108', 'K02115', 'K02110', 'K02113', 'K02109', 'K02112', 'K02111', 'K02114'} | M00157 |
| GCA_023257815.1_ASM2325781v1_genomic                          | {'K02108', 'K02112', 'K02111', 'K02115', 'K02110', 'K02113', 'K02114'}           | M00157 |
| GCA_023257815.1_ASM2325781v1_genomic                          | {'K02298', 'K02300', 'K02297', 'K02299'}                                         | M00417 |
| RSZAXPI002641-101_RA_dental.metaspades.bin.55                 | {'K00927', 'K01689', 'K01803', 'K00134', 'K00873'}                               | M00002 |
| RSZAXPI002641-101_RA_dental.metaspades.bin.55                 | {'K02108', 'K02115', 'K02110', 'K02113', 'K02109', 'K02112', 'K02111', 'K02114'} | M00157 |
| R0170300288_tooth_RAH.megahit.bin.22                          | {'K15633', 'K00927', 'K01689', 'K01803', 'K00134', 'K00873'}                     | M00002 |
| R0170300288_tooth_RAH.megahit.bin.22                          | {'K00625', 'K00925'}                                                             | M00579 |
| RSZYD18078483_A_saliva.metaspades.bin.4                       | {'K01834', 'K00927', 'K01689', 'K01803', 'K00134', 'K00873'}                     | M00002 |
| RSZYD18078483_A_saliva.metaspades.bin.4                       | {'K02108', 'K02115', 'K02110', 'K02113', 'K02109', 'K02112', 'K02111', 'K02114'} | M00157 |
| R0170300254_tooth_RAH.megahit.bin.128                         | {'K02108', 'K02115', 'K02110', 'K02113', 'K02109', 'K02112', 'K02111', 'K02114'} | M00157 |
| YS000208_saliva.spades.bin.26                                 | {'K01834', 'K00927', 'K01689', 'K01803', 'K00134', 'K00873'}                     | M00002 |
| YS000208_saliva.spades.bin.26                                 | {'K02108', 'K02109', 'K02112', 'K02110', 'K02114'}                               | M00157 |
| YS000374_saliva.spades.bin.11                                 | {'K01834', 'K00927', 'K01689', 'K01803', 'K00134', 'K00873'}                     | M00002 |
| YS000374_saliva.spades.bin.11                                 | {'K02108', 'K02115', 'K02110', 'K02113', 'K02109', 'K02112', 'K02111', 'K02114'} | M00157 |
| R0170300221_tooth_RA.megahit.bin.80                           | {'K01834', 'K00927', 'K01689', 'K01803', 'K00134', 'K00873'}                     | M00002 |
| R0170300221_tooth_RA.megahit.bin.80                           | {'K02108', 'K02115', 'K02110', 'K02113', 'K02109', 'K02112', 'K02111', 'K02114'} | M00157 |
| GCA_007845355.1_ASM784535v1_genomic                           | {'K01834', 'K00927', 'K01689', 'K01803', 'K00134', 'K00873'}                     | M00002 |
| GCA_007845355.1_ASM784535v1_genomic                           | {'K02108', 'K02109', 'K02110', 'K02113'}                                         | M00157 |
| GCA_014377345.1_ASM1437734v1_genomic                          | {'K00927', 'K01803', 'K00134', 'K00873'}                                         | M00002 |
| GCA_014377345.1_ASM1437734v1_genomic                          | {'K02108', 'K02112', 'K02111', 'K02115', 'K02110', 'K02113', 'K02114'}           | M00157 |
| GCA_014377345.1_ASM1437734v1_genomic                          | {'K02298', 'K02300', 'K02297', 'K02299'}                                         | M00417 |
| RDPYD18300312_A_saliva.metaspades.bin.31                      | {'K01834', 'K00927', 'K01689', 'K01803', 'K00134', 'K00873'}                     | M00002 |
| RDPYD18300312_A_saliva.metaspades.bin.31                      | {'K02109', 'K02112', 'K02111', 'K02110', 'K02113', 'K02114'}                     | M00157 |
| GCA_002413795.1_ASM241379v1_genomic                           | {'K02108', 'K02115', 'K02110', 'K02113', 'K02109', 'K02112', 'K02111', 'K02114'} | M00157 |
| GCA_002413795.1_ASM241379v1_genomic                           | {'K02298', 'K02300', 'K02297', 'K02299'}                                         | M00417 |
| RSZYD18078400_A_saliva.metaspades.bin.68                      | {'K01834', 'K00927', 'K01689', 'K01803', 'K00134', 'K00873'}                     | M00002 |
| RSZYD18078400_A_saliva.metaspades.bin.68                      | {'K02108', 'K02115', 'K02110', 'K02113', 'K02109', 'K02112', 'K02111', 'K02114'} | M00157 |
| GCA_915070725.1_SRR1045092_bin.5_metaWRAP_v1.1_MAG_genomic    | {'K01834', 'K00927', 'K01689', 'K01803', 'K00134', 'K00873'}                     | M00002 |
| YS000073_saliva.spades.bin.20                                 | {'K01834', 'K00927', 'K01689', 'K01803', 'K00134', 'K00873'}                     | M00002 |
| GCA_947097085.1_SRR8786267_bin.10_metaWRAP_v1.3_MAG_genomic   | {'K01834', 'K00927', 'K01689', 'K01803', 'K00134', 'K00873'}                     | M00002 |
| RDPYD18189858_A_saliva.metaspades.bin.62                      | {'K00927', 'K01689', 'K01803', 'K00134', 'K00873'}                               | M00002 |
| RSZYD18187652_A_saliva.metaspades.bin.2                       | {'K00927', 'K01689', 'K01803', 'K00134', 'K00873'}                               | M00002 |
| RSZYD18187652_A_saliva.metaspades.bin.2                       | {'K00625', 'K00925'}                                                             | M00579 |
| GCA_017531585.1_ASM1753158v1_genomic                          | {'K15633', 'K00927', 'K01689', 'K01803', 'K00134', 'K00873'}                     | M00002 |
| GCA_017531585.1_ASM1753158v1_genomic                          | {'K00925', 'K00625', 'K13788'}                                                   | M00579 |
| GCA_015663315.1_ASM1566331v1_genomic                          | {'K00927', 'K01689', 'K01803', 'K00134', 'K00873'}                               | M00002 |
| GCA_015663315.1_ASM1566331v1_genomic                          | {'K02108', 'K02115', 'K02110', 'K02113', 'K02109', 'K02112', 'K02111', 'K02114'} | M00157 |
| RSZYD18078769_A_saliva.metaspades.bin.60                      | {'K15633', 'K00927', 'K01689', 'K01803', 'K00134', 'K00873'}                     | M00002 |
| RSZYD18078769_A_saliva.metaspades.bin.60                      | {'K00625', 'K00925'}                                                             | M00579 |
| RSZAXPI002641-101_RA_dental.metaspades.bin.19                 | {'K02108', 'K02115', 'K02110', 'K02113', 'K02109', 'K02112', 'K02111', 'K02114'} | M00157 |
| SRR8114077.metaspades.bin.2                                   | {'K01834', 'K00927', 'K01689', 'K01803', 'K00134', 'K00873'}                     | M00002 |
| SRR8114077.metaspades.bin.2                                   | {'K02108', 'K02115', 'K02110', 'K02113', 'K02109', 'K02112', 'K02111', 'K02114'} | M00157 |
| RSZYD18187330_A_saliva.metaspades.bin.47                      | {'K01834', 'K00927', 'K01689', 'K01803', 'K00134', 'K00873'}                     | M00002 |
| R0170300289_tooth_RAH.megahit.bin.36                          | {'K00927', 'K01689', 'K01803', 'K00134', 'K00873'}                               | M00002 |
| R0170300289_tooth_RAH.megahit.bin.36                          | {'K02108', 'K02115', 'K02110', 'K02113', 'K02109', 'K02112', 'K02111', 'K02114'} | M00157 |
| RDPYD18300323_A_saliva.metaspades.bin.46                      | {'K01834', 'K00927', 'K01689', 'K01803', 'K00134', 'K00873'}                     | M00002 |
| R0170300300_tooth_RAH.megahit.bin.146                         | {'K00927', 'K01689', 'K01803', 'K00134', 'K00873'}                               | M00002 |
| R0170300300_tooth_RAH.megahit.bin.146                         | {'K02108', 'K02115', 'K02110', 'K02113', 'K02109', 'K02112', 'K02111', 'K02114'} | M00157 |
| YS000416_saliva.spades.bin.11                                 | {'K01834', 'K00927', 'K01689', 'K01803', 'K00134', 'K00873'}                     | M00002 |
| YS000416_saliva.spades.bin.11                                 | {'K02108', 'K02109', 'K02112', 'K02110', 'K02113', 'K02114'}                     | M00157 |
| SZAXPI018273-75_RA_dental.metaspades.bin.22                   | {'K00927', 'K01689', 'K01803', 'K00134', 'K00873'}                               | M00002 |
| SZAXPI018273-75_RA_dental.metaspades.bin.22                   | {'K02108', 'K02115', 'K02110', 'K02113', 'K02109', 'K02112', 'K02111', 'K02114'} | M00157 |
| SZAXPI018284-111_RA_dental.metaspades.bin.60                  | {'K01834', 'K01689', 'K01803', 'K00134', 'K00873'}                               | M00002 |
| SZAXPI018284-111_RA_dental.metaspades.bin.60                  | {'K02108', 'K02115', 'K02110', 'K02113', 'K02109', 'K02112', 'K02111', 'K02114'} | M00157 |
| GCA_900555675.1_UMGS1848_genomic                              | {'K01834', 'K00927', 'K01689', 'K01803', 'K00134', 'K00873'}                     | M00002 |
| GCA_900555675.1_UMGS1848_genomic                              | {'K02108', 'K02115', 'K02110', 'K02113', 'K02109', 'K02112', 'K02111', 'K02114'} | M00157 |
| GCA_027427915.1_ASM2742791v1_genomic                          | {'K00927', 'K01803', 'K00134', 'K00873'}                                         | M00002 |
| GCA_027427915.1_ASM2742791v1_genomic                          | {'K02108', 'K02115', 'K02110', 'K02113', 'K02109', 'K02112', 'K02111', 'K02114'} | M00157 |
| GCA_027427915.1_ASM2742791v1_genomic                          | {'K02298', 'K02300', 'K02297', 'K02299'}                                         | M00417 |
| GCA_017537745.1_ASM1753774v1_genomic                          | {'K15633', 'K00927', 'K01689', 'K01803', 'K00134', 'K00873'}                     | M00002 |
| GCA_017537745.1_ASM1753774v1_genomic                          | {'K01897'}                                                                       | M00086 |
| GCA_017537745.1_ASM1753774v1_genomic                          | {'K00625', 'K00925'}                                                             | M00579 |
| GCA_013333575.2_ASM1333357v2_genomic                          | {'K02108', 'K02115', 'K02110', 'K02113', 'K02109', 'K02112', 'K02111', 'K02114'} | M00157 |
| GCA_904425485.1_PRJEB35131-2_genomic                          | {'K01834', 'K00927', 'K01689', 'K01803', 'K00134', 'K00873'}                     | M00002 |
| GCA_904425485.1_PRJEB35131-2_genomic                          | {'K02108', 'K02115', 'K02110', 'K02113', 'K02109', 'K02112', 'K02111', 'K02114'} | M00157 |
| GCA_946479835.1_SRR15094062_bin.4_metawrap_v1.3.0_MAG_genomic | {'K02108', 'K02112', 'K02110', 'K02114'}                                         | M00157 |
| GCA_946479835.1_SRR15094062_bin.4_metawrap_v1.3.0_MAG_genomic | {'K02298', 'K02300', 'K02297', 'K02299'}                                         | M00417 |
| R0170300203_tooth_RA.megahit.bin.94                           | {'K02108', 'K02115', 'K02110', 'K02113', 'K02109', 'K02112', 'K02111', 'K02114'} | M00157 |
| RSZYD18187760_A_saliva.metaspades.bin.26                      | {'K01834', 'K00927', 'K01689', 'K01803', 'K00134', 'K00873'}                     | M00002 |
| RSZYD18187760_A_saliva.metaspades.bin.26                      | {'K02108', 'K02115', 'K02110', 'K02113', 'K02109', 'K02112', 'K02111', 'K02114'} | M00157 |
| R0170300120_tooth_RAH.megahit.bin.106                         | {'K00927', 'K01689', 'K01803', 'K00134', 'K00873'}                               | M00002 |
| R0170300120_tooth_RAH.megahit.bin.106                         | {'K02108', 'K02115', 'K02110', 'K02113', 'K02109', 'K02112', 'K02111', 'K02114'} | M00157 |
| RDPYD18088983_A_saliva.metaspades.bin.11                      | {'K01834', 'K00927', 'K01689', 'K01803', 'K00134', 'K00873'}                     | M00002 |
| RDPYD18088983_A_saliva.metaspades.bin.11                      | {'K02108', 'K02115', 'K02110', 'K02113', 'K02109', 'K02112', 'K02111', 'K02114'} | M00157 |
| RSZYD18078148_A_saliva.metaspades.bin.14                      | {'K15633', 'K00927', 'K01689', 'K01803', 'K00134', 'K00873'}                     | M00002 |
| RSZYD18078148_A_saliva.metaspades.bin.14                      | {'K00625', 'K00925'}                                                             | M00579 |
| YS000290_saliva.spades.bin.16                                 | {'K01834', 'K01689', 'K01803'}                                                   | M00002 |
| YS000290_saliva.spades.bin.16                                 | {'K02108', 'K02109', 'K02111', 'K02115', 'K02110', 'K02113'}                     | M00157 |
| R0170300210_tooth_RAH.megahit.bin.95                          | {'K01834', 'K01689', 'K01803', 'K00134', 'K00873'}                               | M00002 |
| R0170300210_tooth_RAH.megahit.bin.95                          | {'K02108', 'K02115', 'K02110', 'K02113', 'K02109', 'K02112', 'K02111', 'K02114'} | M00157 |
| RSZYD18187110_A_saliva.metaspades.bin.14                      | {'K01834', 'K00927', 'K01689', 'K01803', 'K00134', 'K00873'}                     | M00002 |
| RSZYD18187110_A_saliva.metaspades.bin.14                      | {'K02108', 'K02115', 'K02110', 'K02113', 'K02109', 'K02112', 'K02111', 'K02114'} | M00157 |
| YS000122_saliva.spades.bin.4                                  | {'K01834', 'K00927', 'K01689', 'K01803', 'K00134', 'K00873'}                     | M00002 |
| YS000122_saliva.spades.bin.4                                  | {'K02108', 'K02115', 'K02110', 'K02113', 'K02109', 'K02112', 'K02111', 'K02114'} | M00157 |
| R0170300236_tooth_RAH.megahit.bin.77                          | {'K15633', 'K00927', 'K01689', 'K01803', 'K00134', 'K00873'}                     | M00002 |
| R0170300236_tooth_RAH.megahit.bin.77                          | {'K02108', 'K02115', 'K02110', 'K02113', 'K02109', 'K02112', 'K02111', 'K02114'} | M00157 |



|                                                                    |                                                                                  |        |
|--------------------------------------------------------------------|----------------------------------------------------------------------------------|--------|
| SZAXPI018278-93 RA_dental.metaspades.bin.41                        | {'K01834', 'K00927', 'K01689', 'K01803', 'K00134', 'K00873'}                     | M00002 |
| SZAXPI018278-93 RA_dental.metaspades.bin.41                        | {'K02108', 'K02115', 'K02110', 'K02113', 'K02109', 'K02112', 'K02111', 'K02114'} | M00157 |
| RDPYD18300015 A_saliva.metaspades.bin.29                           | {'K15633', 'K00927', 'K01689', 'K01803', 'K00134', 'K00873'}                     | M00002 |
| RDPYD18300015 A_saliva.metaspades.bin.29                           | {'K00625', 'K00925'}                                                             | M00579 |
| SZAXPI018354-19 RA_saliva.metaspades.bin.2                         | {'K01834', 'K00927', 'K01689', 'K01803', 'K00134', 'K00873'}                     | M00002 |
| GCA_013316035.1 ASM1331603v1_genomic                               | {'K15633', 'K00927', 'K01689', 'K01803', 'K00134', 'K00873'}                     | M00002 |
| RDPYD18101881 A_saliva.metaspades.bin.12                           | {'K00927', 'K01689', 'K01803', 'K00134', 'K00873'}                               | M00002 |
| RDPYD18101881 A_saliva.metaspades.bin.12                           | {'K02108', 'K02115', 'K02110', 'K02113', 'K02109', 'K02112', 'K02111', 'K02114'} | M00157 |
| RDPYD18099036 A_saliva.metaspades.bin.59                           | {'K01834', 'K00927', 'K01689', 'K01803', 'K00134', 'K00873'}                     | M00002 |
| SRR6748159.metaspades.bin.19                                       | {'K01834', 'K00927', 'K01689', 'K01803', 'K00134', 'K00873'}                     | M00002 |
| SRR6748159.metaspades.bin.19                                       | {'K02108', 'K02115', 'K02110', 'K02113', 'K02109', 'K02112', 'K02111', 'K02114'} | M00157 |
| GCA_018127705.1 ASM1812770v1_genomic                               | {'K01834', 'K01689', 'K01803', 'K00134', 'K00873'}                               | M00002 |
| GCA_018127705.1 ASM1812770v1_genomic                               | {'K02108', 'K02115', 'K02110', 'K02113', 'K02109', 'K02112', 'K02111', 'K02114'} | M00157 |
| RSZYD18187216 A_saliva.metaspades.bin.13                           | {'K01834', 'K00927', 'K01689', 'K01803', 'K00134', 'K00873'}                     | M00002 |
| GCA_017510075.1                                                    | {'K15633', 'K00927', 'K01689', 'K01803', 'K00134', 'K00873'}                     | M00002 |
| GCA_017510075.1                                                    | {'K01897'}                                                                       | M00086 |
| RSZYD18078307 A_saliva.metaspades.bin.33                           | {'K01834', 'K00927', 'K01689', 'K01803', 'K00134', 'K00873'}                     | M00002 |
| RSZYD18078307 A_saliva.metaspades.bin.33                           | {'K02108', 'K02115', 'K02110', 'K02113', 'K02109', 'K02112', 'K02111', 'K02114'} | M00157 |
| R0170300306 tooth_RAH.megahit.bin.30                               | {'K01834', 'K01689', 'K01803', 'K00134', 'K00873'}                               | M00002 |
| R0170300306 tooth_RAH.megahit.bin.30                               | {'K02108', 'K02115', 'K02110', 'K02113', 'K02109', 'K02112', 'K02111', 'K02114'} | M00157 |
| GCA_947098845.1_SRR8786267_bin.6_metaWRAP_v1.3_MAG_genomic         | {'K01834', 'K01689', 'K01803', 'K00134', 'K00873'}                               | M00002 |
| GCA_947098845.1_SRR8786267_bin.6_metaWRAP_v1.3_MAG_genomic         | {'K02108', 'K02115', 'K02110', 'K02113', 'K02109', 'K02112', 'K02111', 'K02114'} | M00157 |
| GCA_017514045.1                                                    | {'K15633', 'K00927', 'K01689', 'K01803', 'K00134', 'K00873'}                     | M00002 |
| GCA_017514045.1                                                    | {'K01897'}                                                                       | M00086 |
| RSZYD18187379 A_saliva.metaspades.bin.62                           | {'K01834', 'K00927', 'K01689', 'K01803', 'K00134', 'K00873'}                     | M00002 |
| RSZYD18187379 A_saliva.metaspades.bin.62                           | {'K02112', 'K02114'}                                                             | M00157 |
| SZAXPI018286-123 RA_dental.metaspades.bin.16                       | {'K15633', 'K00927', 'K01689', 'K01803', 'K00134', 'K00873'}                     | M00002 |
| SZAXPI018286-123 RA_dental.metaspades.bin.16                       | {'K00625', 'K00925'}                                                             | M00579 |
| R0170300170 tooth_RAH.megahit.bin.1                                | {'K02108', 'K02115', 'K02110', 'K02113', 'K02109', 'K02112', 'K02111', 'K02114'} | M00157 |
| RSZAXPI002325-39 RAH_dental.metaspades.bin.11                      | {'K01834', 'K01689', 'K01803', 'K00134', 'K00873'}                               | M00002 |
| RSZAXPI002325-39 RAH_dental.metaspades.bin.11                      | {'K02108', 'K02115', 'K02110', 'K02113', 'K02109', 'K02112', 'K02111', 'K02114'} | M00157 |
| RSZAXPI002330-47 RAH_dental.metaspades.bin.70                      | {'K01834', 'K00927', 'K01689', 'K01803', 'K00134', 'K00873'}                     | M00002 |
| R0170300281 tooth_RAH.megahit.bin.128                              | {'K00927', 'K01689', 'K01803', 'K00134', 'K00873'}                               | M00002 |
| GCA_027331915.1 ASM2733191v1_genomic                               | {'K00927', 'K01803', 'K00134', 'K00873'}                                         | M00002 |
| GCA_027331915.1 ASM2733191v1_genomic                               | {'K02108', 'K02115', 'K02110', 'K02113', 'K02109', 'K02112', 'K02111', 'K02114'} | M00157 |
| GCA_027331915.1 ASM2733191v1_genomic                               | {'K02298', 'K02300', 'K02297', 'K02299'}                                         | M00417 |
| R0170300239 tooth_RAH.megahit.bin.85                               | {'K15633', 'K00927', 'K01689', 'K01803', 'K00134', 'K00873'}                     | M00002 |
| R0170300239 tooth_RAH.megahit.bin.85                               | {'K00925', 'K00625', 'K13788'}                                                   | M00579 |
| SZAXPI018189-47 RA_dental.metaspades.bin.68                        | {'K00927', 'K01689', 'K01803', 'K00134', 'K00873'}                               | M00002 |
| SZAXPI018189-47 RA_dental.metaspades.bin.68                        | {'K02108', 'K02115', 'K02110', 'K02113', 'K02109', 'K02112', 'K02111', 'K02114'} | M00157 |
| R0170300161 tooth_RA.megahit.bin.8                                 | {'K01834', 'K01689', 'K01803', 'K00134', 'K00873'}                               | M00002 |
| R0170300161 tooth_RA.megahit.bin.8                                 | {'K02108', 'K02115', 'K02110', 'K02113', 'K02109', 'K02112', 'K02111', 'K02114'} | M00157 |
| SRR8114033.metaspades.bin.42                                       | {'K00927', 'K01689', 'K01803', 'K00134', 'K00873'}                               | M00002 |
| SRR8114033.metaspades.bin.42                                       | {'K02108', 'K02115', 'K02110', 'K02113', 'K02109', 'K02112', 'K02111', 'K02114'} | M00157 |
| R0170300075 tooth_RA.megahit.bin.36                                | {'K00927', 'K01689', 'K01803', 'K00134', 'K00873'}                               | M00002 |
| R0170300102 tooth_RA.megahit.bin.26                                | {'K01834', 'K00927', 'K01689', 'K01803', 'K00134', 'K00873'}                     | M00002 |
| R0170300102 tooth_RA.megahit.bin.26                                | {'K02108', 'K02109', 'K02112', 'K02111', 'K02115', 'K02110', 'K02114'}           | M00157 |
| RDPYD18098859 A_saliva.metaspades.bin.8                            | {'K01834', 'K00927', 'K01689', 'K01803', 'K00134', 'K00873'}                     | M00002 |
| RDPYD18098859 A_saliva.metaspades.bin.8                            | {'K02108', 'K02115', 'K02110', 'K02113', 'K02109', 'K02112', 'K02111', 'K02114'} | M00157 |
| GCA_903840315.1_freshwater_MAG_---_AM-lipid-02-D2_bin-0413_genomic | {'K00927', 'K01803', 'K00134', 'K00873'}                                         | M00002 |
| GCA_903840315.1_freshwater_MAG_---_AM-lipid-02-D2_bin-0413_genomic | {'K02108', 'K02109', 'K02112', 'K02111', 'K02115', 'K02110', 'K02114'}           | M00157 |
| GCA_903840315.1_freshwater_MAG_---_AM-lipid-02-D2_bin-0413_genomic | {'K02298', 'K02300', 'K02297', 'K02299'}                                         | M00417 |
| SZAXPI018286-123 RA_dental.metaspades.bin.94                       | {'K15633', 'K00927', 'K01689', 'K01803', 'K00134', 'K00873'}                     | M00002 |
| SZAXPI018286-123 RA_dental.metaspades.bin.94                       | {'K00625', 'K00925'}                                                             | M00579 |
| GCA_017434485.1                                                    | {'K15633', 'K00927', 'K01689', 'K01803', 'K00134', 'K00873'}                     | M00002 |
| GCA_026395375.1 ASM2639537v1_genomic                               | {'K01834', 'K00927', 'K01689', 'K01803', 'K00134', 'K00873'}                     | M00002 |
| GCA_026395375.1 ASM2639537v1_genomic                               | {'K02108', 'K02109', 'K02112', 'K02111', 'K02115', 'K02110', 'K02114'}           | M00157 |
| GCA_026395375.1 ASM2639537v1_genomic                               | {'K02300', 'K02297', 'K02299'}                                                   | M00417 |
| YS001129 saliva.spades.bin.13                                      | {'K01834', 'K00927', 'K01689', 'K01803', 'K00134', 'K00873'}                     | M00002 |
| YS001129 saliva.spades.bin.13                                      | {'K02108', 'K02115', 'K02110', 'K02113', 'K02109', 'K02112', 'K02111', 'K02114'} | M00157 |
| SZAXPI018453-13 RA_saliva.metaspades.bin.65                        | {'K01834', 'K00927', 'K01689', 'K01803', 'K00134', 'K00873'}                     | M00002 |
| GCA_004100325.1 ASM410032v1_genomic                                | {'K00927', 'K01803', 'K00134', 'K00873'}                                         | M00002 |
| GCA_004100325.1 ASM410032v1_genomic                                | {'K02108', 'K02115', 'K02110', 'K02113', 'K02109', 'K02112', 'K02111', 'K02114'} | M00157 |
| GCA_004100325.1 ASM410032v1_genomic                                | {'K02298', 'K02300', 'K02297', 'K02299'}                                         | M00417 |
| GCA_947307355.1_SRR10912536_bin.13_metaWRAP_v1.3_MAG_genomic       | {'K15633', 'K00927', 'K01689', 'K01803', 'K00134', 'K00873'}                     | M00002 |
| GCA_947307355.1_SRR10912536_bin.13_metaWRAP_v1.3_MAG_genomic       | {'K01897'}                                                                       | M00086 |
| RSZAXPI002314-23 RAH_dental.metaspades.bin.46                      | {'K00927', 'K01689', 'K01803', 'K00134', 'K00873'}                               | M00002 |
| GCA_017983775.1 ASM1798377v1_genomic                               | {'K00927', 'K01803', 'K00134', 'K00873'}                                         | M00002 |
| GCA_017983775.1 ASM1798377v1_genomic                               | {'K02108', 'K02115', 'K02110', 'K02113', 'K02109', 'K02112', 'K02111', 'K02114'} | M00157 |
| GCA_946479115.1_ERR5385026_bin.7_metawrap_v1.3.0_MAG_genomic       | {'K00927', 'K01803', 'K00134', 'K00873'}                                         | M00002 |
| GCA_946479115.1_ERR5385026_bin.7_metawrap_v1.3.0_MAG_genomic       | {'K02108', 'K02115', 'K02110', 'K02113', 'K02109', 'K02112', 'K02111', 'K02114'} | M00157 |
| GCA_946479115.1_ERR5385026_bin.7_metawrap_v1.3.0_MAG_genomic       | {'K02298', 'K02300', 'K02297', 'K02299'}                                         | M00417 |
| GCA_017420225.1                                                    | {'K15633', 'K00927', 'K01689', 'K01803', 'K00134', 'K00873'}                     | M00002 |
| GCA_017420225.1                                                    | {'K01897'}                                                                       | M00086 |
| GCA_017420225.1                                                    | {'K00925', 'K00625', 'K13788'}                                                   | M00579 |
| RSZYD18187336 A_saliva.metaspades.bin.56                           | {'K15633', 'K00927', 'K01689', 'K01803', 'K00134'}                               | M00002 |
| RSZYD18187336 A_saliva.metaspades.bin.56                           | {'K00625', 'K00925'}                                                             | M00579 |
| R0170300147 tooth_RA.megahit.bin.17                                | {'K01834', 'K01689', 'K01803', 'K00134', 'K00873'}                               | M00002 |
| R0170300147 tooth_RA.megahit.bin.17                                | {'K02108', 'K02115', 'K02110', 'K02113', 'K02109', 'K02112', 'K02111', 'K02114'} | M00157 |
| RSZYD18078153 A_saliva.metaspades.bin.25                           | {'K01834', 'K00927', 'K01689', 'K01803', 'K00134', 'K00873'}                     | M00002 |
| RSZYD18078153 A_saliva.metaspades.bin.25                           | {'K02108', 'K02115', 'K02110', 'K02113', 'K02109', 'K02112', 'K02111', 'K02114'} | M00157 |
| RSZYD18078463 A_saliva.metaspades.bin.4                            | {'K01834', 'K00927', 'K01689', 'K01803', 'K00134', 'K00873'}                     | M00002 |
| GCA_002425115.1 ASM242511v1_genomic                                | {'K00927', 'K01803', 'K00134', 'K00873'}                                         | M00002 |
| GCA_002425115.1 ASM242511v1_genomic                                | {'K02108', 'K02115', 'K02110', 'K02113', 'K02109', 'K02112', 'K02111', 'K02114'} | M00157 |
| GCA_002425115.1 ASM242511v1_genomic                                | {'K02298', 'K02300', 'K02297', 'K02299'}                                         | M00417 |
| RSZYD18187852 A_saliva.metaspades.bin.38                           | {'K01834', 'K00927', 'K01689', 'K01803', 'K00134', 'K00873'}                     | M00002 |
| RSZYD18187852 A_saliva.metaspades.bin.38                           | {'K02108', 'K02115', 'K02110', 'K02113', 'K02109', 'K02112', 'K02111', 'K02114'} | M00157 |
| R0170300285 tooth_RAH.megahit.bin.44                               | {'K01834', 'K01689', 'K01803', 'K00134', 'K00873'}                               | M00002 |
| R0170300285 tooth_RAH.megahit.bin.44                               | {'K02108', 'K02115', 'K02110', 'K02113', 'K02109', 'K02112', 'K02111', 'K02114'} | M00157 |
| R0170300194 tooth_RA.megahit.bin.76                                | {'K00927', 'K01689', 'K01803', 'K00134', 'K00873'}                               | M00002 |
| R0170300194 tooth_RA.megahit.bin.76                                | {'K02108', 'K02115', 'K02110', 'K02113', 'K02109', 'K02112', 'K02111', 'K02114'} | M00157 |
| GCA_017515105.1 ASM1751510v1_genomic                               | {'K15633', 'K00927', 'K01689', 'K01803', 'K00134', 'K00873'}                     | M00002 |
| GCA_017515105.1 ASM1751510v1_genomic                               | {'K01897'}                                                                       | M00086 |
| GCA_017515105.1 ASM1751510v1_genomic                               | {'K00625', 'K00925'}                                                             | M00579 |
| GCA_010201925.1 ASM1020192v1_genomic                               | {'K01834', 'K00927', 'K01689', 'K01803', 'K00134', 'K00873'}                     | M00002 |
| GCA_010201925.1 ASM1020192v1_genomic                               | {'K02108', 'K02115', 'K02110', 'K02113', 'K02109', 'K02112', 'K02111', 'K02114'} | M00157 |
| GCA_017515205.1 ASM1751520v1_genomic                               | {'K15633', 'K00927', 'K01689', 'K01803', 'K00134', 'K00873'}                     | M00002 |
| GCA_017515205.1 ASM1751520v1_genomic                               | {'K01897'}                                                                       | M00086 |
| GCA_017515205.1 ASM1751520v1_genomic                               | {'K00625', 'K00925'}                                                             | M00579 |
| SZAXPI018177-33 RA_dental.metaspades.bin.61                        | {'K01834', 'K00927', 'K01689', 'K01803', 'K00134', 'K00873'}                     | M00002 |
| SZAXPI018177-33 RA_dental.metaspades.bin.61                        | {'K02108', 'K02115', 'K02110', 'K02113', 'K02109', 'K02112', 'K02111', 'K02114'} | M00157 |
| GCA_947346675.1_SRR14629574_bin.28_metawrap_v1.3_MAG_genomic       | {'K15633', 'K00927', 'K01689', 'K01803', 'K00134', 'K00873'}                     | M00002 |
| GCA_947346675.1_SRR14629574_bin.28_metawrap_v1.3_MAG_genomic       | {'K00625', 'K00925'}                                                             | M00579 |
| GCA_014377695.1 ASM1437769v1_genomic                               | {'K02108', 'K02115', 'K02110', 'K02113', 'K02109', 'K02112', 'K02111', 'K02114'} | M00157 |
| GCA_014377695.1 ASM1437769v1_genomic                               | {'K02297'}                                                                       | M00417 |

|                                                              |                                                                                  |        |
|--------------------------------------------------------------|----------------------------------------------------------------------------------|--------|
| SZAXPI018184-41_RA_dental.metaspades.bin.37                  | {'K01834', 'K01689', 'K00873'}                                                   | M00002 |
| SZAXPI018184-41_RA_dental.metaspades.bin.37                  | {'K02108', 'K02115', 'K02110', 'K02113', 'K02109', 'K02112', 'K02111', 'K02114'} | M00157 |
| SZAXPI018397-37_RA_saliva.metaspades.bin.18                  | {'K15633', 'K00927', 'K01689', 'K01803', 'K00134'}                               | M00002 |
| SZAXPI018397-37_RA_saliva.metaspades.bin.18                  | {'K00625', 'K00925'}                                                             | M00579 |
| GCA_017418275.1                                              | {'K15633', 'K00927', 'K01689', 'K01803', 'K00134', 'K00873'}                     | M00002 |
| GCA_017418275.1                                              | {'K00925', 'K00625', 'K13788'}                                                   | M00579 |
| RSZAXPI002655-15_RA_dental.metaspades.bin.44                 | {'K15633', 'K00927', 'K01689', 'K01803', 'K00134', 'K00873'}                     | M00002 |
| RSZAXPI002655-15_RA_dental.metaspades.bin.44                 | {'K00925', 'K00625', 'K13788'}                                                   | M00579 |
| GCA_947089645.1_SRR14038237_bin.40_metawrap_v1.3_MAG_genomic | {'K15633', 'K00927', 'K01689', 'K01803', 'K00134', 'K00873'}                     | M00002 |
| GCA_947089645.1_SRR14038237_bin.40_metawrap_v1.3_MAG_genomic | {'K00625', 'K00925'}                                                             | M00579 |
| R0170300111_tooth_RA.megahit.bin.32                          | {'K00625', 'K00925'}                                                             | M00579 |
| RSZAXPI002641-101_RA_dental.metaspades.bin.62                | {'K01834', 'K01689', 'K01803', 'K00134', 'K00873'}                               | M00002 |
| RSZAXPI002641-101_RA_dental.metaspades.bin.62                | {'K02108', 'K02115', 'K02110', 'K02113', 'K02109', 'K02112', 'K02111', 'K02114'} | M00157 |
| RSZAXPI002326-41_RAH_dental.metaspades.bin.35                | {'K01834', 'K01689', 'K01803', 'K00134', 'K00873'}                               | M00002 |
| RSZAXPI002326-41_RAH_dental.metaspades.bin.35                | {'K02108', 'K02115', 'K02110', 'K02113', 'K02109', 'K02112', 'K02111', 'K02114'} | M00157 |
| SZAXPI018292-158_RA_dental.metaspades.bin.12                 | {'K00927', 'K01689', 'K01803', 'K00134', 'K00873'}                               | M00002 |
| SZAXPI018292-158_RA_dental.metaspades.bin.12                 | {'K02108', 'K02115', 'K02110', 'K02113', 'K02109', 'K02112', 'K02111', 'K02114'} | M00157 |
| GCA_016000245.1_ASM1600024v1_genomic                         | {'K00927', 'K15634', 'K01803', 'K00134', 'K00873'}                               | M00002 |
| GCA_016000245.1_ASM1600024v1_genomic                         | {'K02109', 'K02112', 'K02111', 'K02115', 'K02110', 'K02113', 'K02114'}           | M00157 |
| GCA_016000245.1_ASM1600024v1_genomic                         | {'K02298', 'K02300', 'K02297', 'K02299'}                                         | M00417 |
| RDPYD18098998_A_saliva.metaspades.bin.11                     | {'K01834', 'K00927', 'K01689', 'K01803', 'K00134', 'K00873'}                     | M00002 |
| YS000928_saliva.spades.bin.8                                 | {'K01834', 'K00927', 'K01689', 'K01803', 'K00134', 'K00873'}                     | M00002 |
| YS000928_saliva.spades.bin.8                                 | {'K02108', 'K02115', 'K02110', 'K02113', 'K02109', 'K02112', 'K02111', 'K02114'} | M00157 |
| RSZYD18078582_A_saliva.metaspades.bin.27                     | {'K01834', 'K01689', 'K01803', 'K00134', 'K00873'}                               | M00002 |
| RSZYD18078582_A_saliva.metaspades.bin.27                     | {'K02108', 'K02115', 'K02110', 'K02113', 'K02109', 'K02112', 'K02111', 'K02114'} | M00157 |
| RSZYD18078481_A_saliva.metaspades.bin.7                      | {'K01834', 'K00927', 'K01689', 'K01803', 'K00134', 'K00873'}                     | M00002 |
| R0170300200_tooth_RA.megahit.bin.64                          | {'K01834', 'K01689', 'K01803', 'K00134', 'K00873'}                               | M00002 |
| R0170300200_tooth_RA.megahit.bin.64                          | {'K02108', 'K02115', 'K02110', 'K02113', 'K02109', 'K02112', 'K02111', 'K02114'} | M00157 |
| R0170300181_tooth_RA.megahit.bin.88                          | {'K00927', 'K01689', 'K01803', 'K00134', 'K00873'}                               | M00002 |
| R0170300181_tooth_RA.megahit.bin.88                          | {'K02108', 'K02115', 'K02110', 'K02113', 'K02109', 'K02112', 'K02111', 'K02114'} | M00157 |
| GCA_017512225.1                                              | {'K01897'}                                                                       | M00086 |
| RDPYD18101880_A_saliva.metaspades.bin.11                     | {'K15633', 'K00927', 'K01689', 'K01803', 'K00134'}                               | M00002 |
| RDPYD18101880_A_saliva.metaspades.bin.11                     | {'K00625', 'K00925'}                                                             | M00579 |
| R0170300139_tooth_RA.megahit.bin.75                          | {'K01834', 'K00927', 'K01689', 'K01803', 'K00134', 'K00873'}                     | M00002 |
| R0170300139_tooth_RA.megahit.bin.75                          | {'K02108', 'K02112', 'K02111', 'K02115', 'K02110', 'K02114'}                     | M00157 |
| GCA_013815775.1_ASM1381577v1_genomic                         | {'K02108', 'K02115', 'K02110', 'K02113', 'K02109', 'K02112', 'K02111', 'K02114'} | M00157 |
| GCA_013815775.1_ASM1381577v1_genomic                         | {'K02298', 'K02300', 'K02297', 'K02299'}                                         | M00417 |
| GCA_947253405.1_SRR17635715_bin.15_metaWRAP_v1.3_MAG_genomic | {'K01834', 'K00927', 'K01689', 'K01803', 'K00134', 'K00873'}                     | M00002 |
| GCA_947253405.1_SRR17635715_bin.15_metaWRAP_v1.3_MAG_genomic | {'K01897'}                                                                       | M00086 |
| RSZYD18078781_A_saliva.metaspades.bin.11                     | {'K01834', 'K00927', 'K01803', 'K00134', 'K00873'}                               | M00002 |
| RSZYD18078781_A_saliva.metaspades.bin.11                     | {'K02108', 'K02109', 'K02112', 'K02111', 'K02115', 'K02113', 'K02114'}           | M00157 |
| SZAXPI018287-129_RA_dental.metaspades.bin.34                 | {'K01834', 'K01689', 'K01803', 'K00134', 'K00873'}                               | M00002 |
| SZAXPI018287-129_RA_dental.metaspades.bin.34                 | {'K02108', 'K02115', 'K02110', 'K02113', 'K02109', 'K02112', 'K02111', 'K02114'} | M00157 |
| SZAXPI018315-17_RA_dental.metaspades.bin.21                  | {'K00927', 'K01689', 'K01803', 'K00134', 'K00873'}                               | M00002 |
| GCA_947253945.1_SRR17635701_bin.9_metaWRAP_v1.3_MAG_genomic  | {'K01834', 'K00927', 'K01689', 'K01803', 'K00134', 'K00873'}                     | M00002 |
| GCA_947253945.1_SRR17635701_bin.9_metaWRAP_v1.3_MAG_genomic  | {'K01897'}                                                                       | M00086 |
| RSZAXPI002619-34_RA_dental.metaspades.bin.16                 | {'K15633', 'K00927', 'K01689', 'K01803', 'K00134', 'K00873'}                     | M00002 |
| RSZAXPI002619-34_RA_dental.metaspades.bin.16                 | {'K02108', 'K02115', 'K02110', 'K02113', 'K02109', 'K02112', 'K02111', 'K02114'} | M00157 |
| RSZAXPI002619-34_RA_dental.metaspades.bin.5                  | {'K15633', 'K00927', 'K01689', 'K01803', 'K00134', 'K00873'}                     | M00002 |
| RSZAXPI002619-34_RA_dental.metaspades.bin.5                  | {'K00625', 'K00925'}                                                             | M00579 |
| GCA_013333675.2_ASM1333367v2_genomic                         | {'K01834', 'K01689', 'K01803', 'K00134', 'K00873'}                               | M00002 |
| GCA_013333675.2_ASM1333367v2_genomic                         | {'K02108', 'K02115', 'K02110', 'K02113', 'K02109', 'K02112', 'K02111', 'K02114'} | M00157 |
| RSZYD18078741_A_saliva.metaspades.bin.48                     | {'K01834', 'K00927', 'K01689', 'K01803', 'K00134', 'K00873'}                     | M00002 |
| RSZYD18078741_A_saliva.metaspades.bin.48                     | {'K02108', 'K02115', 'K02110', 'K02113', 'K02109', 'K02112', 'K02111', 'K02114'} | M00157 |
| GCA_027492735.1_ASM2749273v1_genomic                         | {'K01834', 'K00927', 'K01689', 'K01803', 'K00134', 'K00873'}                     | M00002 |
| GCA_027492735.1_ASM2749273v1_genomic                         | {'K02108', 'K02115', 'K02110', 'K02113', 'K02109', 'K02112', 'K02111', 'K02114'} | M00157 |
| GCA_017437945.1                                              | {'K15633', 'K00927', 'K01689', 'K01803', 'K00134', 'K00873'}                     | M00002 |
| GCA_017437945.1                                              | {'K01897'}                                                                       | M00086 |
| GCA_017437945.1                                              | {'K00925', 'K00625', 'K13788'}                                                   | M00579 |
| RSZAXPI002316-25_RAH_dental.metaspades.bin.26                | {'K01834', 'K01689', 'K01803', 'K00134', 'K00873'}                               | M00002 |
| RSZAXPI002316-25_RAH_dental.metaspades.bin.26                | {'K02108', 'K02115', 'K02110', 'K02113', 'K02109', 'K02112', 'K02111', 'K02114'} | M00157 |
| GCA_017513905.1                                              | {'K15633', 'K00927', 'K01689', 'K01803', 'K00134', 'K00873'}                     | M00002 |
| GCA_017513905.1                                              | {'K01897'}                                                                       | M00086 |
| RSZAXPI002458-89_RAH_dental.metaspades.bin.78                | {'K15633', 'K00927', 'K01689', 'K01803', 'K00134', 'K00873'}                     | M00002 |
| RSZAXPI002458-89_RAH_dental.metaspades.bin.78                | {'K02108', 'K02115', 'K02110', 'K02113', 'K02109', 'K02112', 'K02111', 'K02114'} | M00157 |
| SZAXPI018320-22_RA_dental.metaspades.bin.16                  | {'K01834', 'K01689', 'K01803', 'K00134', 'K00873'}                               | M00002 |
| SZAXPI018320-22_RA_dental.metaspades.bin.16                  | {'K02108', 'K02115', 'K02110', 'K02113', 'K02109', 'K02112', 'K02111', 'K02114'} | M00157 |
| SZAXPI018286-123_RA_dental.metaspades.bin.63                 | {'K00927', 'K01689', 'K01803', 'K00134', 'K00873'}                               | M00002 |
| SZAXPI018286-123_RA_dental.metaspades.bin.63                 | {'K02108', 'K02115', 'K02110', 'K02113', 'K02109', 'K02112', 'K02111', 'K02114'} | M00157 |
| RDPYD18098888_A_saliva.metaspades.bin.8                      | {'K01834', 'K00927', 'K01689', 'K01803', 'K00134', 'K00873'}                     | M00002 |
| GCA_027427055.1_ASM2742705v1_genomic                         | {'K00927', 'K01803', 'K00134', 'K00873'}                                         | M00002 |
| GCA_027427055.1_ASM2742705v1_genomic                         | {'K02108', 'K02109', 'K02112', 'K02111', 'K02115', 'K02110', 'K02114'}           | M00157 |
| GCA_027427055.1_ASM2742705v1_genomic                         | {'K02297'}                                                                       | M00417 |
| R0170300208_tooth_RA.megahit.bin.27                          | {'K15633', 'K00927', 'K01689', 'K01803', 'K00134', 'K00873'}                     | M00002 |
| SZAXPI018406-56_RA_saliva.metaspades.bin.70                  | {'K15633', 'K00927', 'K01689', 'K01803', 'K00134', 'K00873'}                     | M00002 |
| SZAXPI018406-56_RA_saliva.metaspades.bin.70                  | {'K00625', 'K00925'}                                                             | M00579 |
| RSZAXPI002636-95_RA_dental.metaspades.bin.30                 | {'K01689', 'K00927', 'K01803', 'K00134'}                                         | M00002 |
| RSZAXPI002636-95_RA_dental.metaspades.bin.30                 | {'K02108', 'K02115', 'K02110', 'K02113', 'K02109', 'K02112', 'K02111', 'K02114'} | M00157 |
| GCA_017406405.1                                              | {'K15633', 'K00927', 'K01803', 'K00134', 'K00873'}                               | M00002 |
| GCA_017406405.1                                              | {'K01897'}                                                                       | M00086 |
| GCA_022842995.1_ASM2284299v1_genomic                         | {'K00927', 'K01803', 'K00134', 'K00873'}                                         | M00002 |
| GCA_022842995.1_ASM2284299v1_genomic                         | {'K02108', 'K02112', 'K02111', 'K02115', 'K02110', 'K02114'}                     | M00157 |
| GCA_022842995.1_ASM2284299v1_genomic                         | {'K02298', 'K02300', 'K02297', 'K02299'}                                         | M00417 |
| R0170300136_tooth_RA.megahit.bin.26                          | {'K01834', 'K00927', 'K01689', 'K01803', 'K00134', 'K00873'}                     | M00002 |
| GCA_013333155.2_ASM1333315v2_genomic                         | {'K15633', 'K00927', 'K01689', 'K01803', 'K00134', 'K00873'}                     | M00002 |
| GCA_013333155.2_ASM1333315v2_genomic                         | {'K00625', 'K00925'}                                                             | M00579 |
| R0170300255_tooth_RAH.megahit.bin.7                          | {'K01834', 'K00927', 'K01689', 'K01803', 'K00134', 'K00873'}                     | M00002 |
| R0170300235_tooth_RAH.megahit.bin.34                         | {'K00927', 'K01689', 'K01803', 'K00134', 'K00873'}                               | M00002 |
| R0170300235_tooth_RAH.megahit.bin.34                         | {'K02108', 'K02115', 'K02110', 'K02113', 'K02109', 'K02112', 'K02111', 'K02114'} | M00157 |
| R0170300176_tooth_RA.megahit.bin.97                          | {'K00927', 'K01689', 'K01803', 'K00134', 'K00873'}                               | M00002 |
| R0170300176_tooth_RA.megahit.bin.97                          | {'K02108', 'K02115', 'K02110', 'K02113', 'K02109', 'K02112', 'K02111', 'K02114'} | M00157 |
| RDPYD18300377_A_saliva.metaspades.bin.20                     | {'K15633', 'K00927', 'K01689', 'K01803', 'K00134', 'K00873'}                     | M00002 |
| RDPYD18300377_A_saliva.metaspades.bin.20                     | {'K00625', 'K00925'}                                                             | M00579 |
| GCA_002427805.1_ASM242780v1_genomic                          | {'K00927', 'K15634', 'K01803', 'K00134', 'K00873'}                               | M00002 |
| GCA_002427805.1_ASM242780v1_genomic                          | {'K02108', 'K02115', 'K02110', 'K02113', 'K02109', 'K02112', 'K02111', 'K02114'} | M00157 |
| GCA_002427805.1_ASM242780v1_genomic                          | {'K02298', 'K02300', 'K02297', 'K02299'}                                         | M00417 |
| GCA_002413425.1_ASM241342v1_genomic                          | {'K00927', 'K01803', 'K00134', 'K00873'}                                         | M00002 |
| GCA_002413425.1_ASM241342v1_genomic                          | {'K02108', 'K02115', 'K02110', 'K02113', 'K02109', 'K02112', 'K02111', 'K02114'} | M00157 |
| R0170300213_tooth_RA.megahit.bin.11                          | {'K01834', 'K00927', 'K01689', 'K01803', 'K00134', 'K00873'}                     | M00002 |
| R0170300213_tooth_RA.megahit.bin.11                          | {'K00625', 'K00925'}                                                             | M00579 |
| RDPYD18098875_A_saliva.metaspades.bin.44                     | {'K01834', 'K00927', 'K01689', 'K01803', 'K00134', 'K00873'}                     | M00002 |
| RDPYD18098875_A_saliva.metaspades.bin.44                     | {'K02108', 'K02115', 'K02110', 'K02113', 'K02109', 'K02112', 'K02111', 'K02114'} | M00157 |
| YS000726_saliva.spades.bin.20                                | {'K01834', 'K00927', 'K01689', 'K01803', 'K00134', 'K00873'}                     | M00002 |
| YS000726_saliva.spades.bin.20                                | {'K02108', 'K02115', 'K02110', 'K02113', 'K02109', 'K02112', 'K02111', 'K02114'} | M00157 |
| RSZYD18078562_A_saliva.metaspades.bin.64                     | {'K15633', 'K00927', 'K01689', 'K01803', 'K00134', 'K00873'}                     | M00002 |



|                                                                    |                                                                           |        |
|--------------------------------------------------------------------|---------------------------------------------------------------------------|--------|
| RSZYD18078562_A_saliva.metaspades.bin.64                           | {'K00625','K00925'}                                                       | M00579 |
| GCA_014191035.1_ASM1419103v1_genomic                               | {'K00927','K01689','K01803','K00134','K00873'}                            | M00002 |
| RDPYD18098961_A_saliva.metaspades.bin.6                            | {'K01834','K00927','K01689','K01803','K00134','K00873'}                   | M00002 |
| RDPYD18098961_A_saliva.metaspades.bin.6                            | {'K02108','K02115','K02110','K02113','K02109','K02112','K02111','K02114'} | M00157 |
| GCA_026395395.1_ASM2639539v1_genomic                               | {'K02108','K02109','K02112','K02111','K02115','K02110','K02113'}          | M00157 |
| SZAXPI018274-87_RA_dental.metaspades.bin.66                        | {'K01834','K00927','K01689','K01803','K00134','K00873'}                   | M00002 |
| GCA_010202115.1_ASM1020211v1_genomic                               | {'K01834','K00927','K01689','K01803','K00134','K00873'}                   | M00002 |
| GCA_010202115.1_ASM1020211v1_genomic                               | {'K02108','K02109','K02112','K02111','K02115','K02110','K02114'}          | M00157 |
| R0170300187_tooth_RA.megahit.bin.57                                | {'K00927','K01689','K01803','K00134','K00873'}                            | M00002 |
| R0170300187_tooth_RA.megahit.bin.57                                | {'K02108','K02115','K02110','K02113','K02109','K02112','K02111','K02114'} | M00157 |
| GCA_001873625.1_ASM187362v1_genomic                                | {'K02108','K02115','K02110','K02113','K02109','K02112','K02111','K02114'} | M00157 |
| GCA_946478995.1_SRR15094062_bin.6_metawrap_v1.3.0_MAG_genomic      | {'K01834','K00927','K01689','K01803','K00134','K00873'}                   | M00002 |
| GCA_946478995.1_SRR15094062_bin.6_metawrap_v1.3.0_MAG_genomic      | {'K02108','K02109','K02112','K02111','K02115','K02110','K02114'}          | M00157 |
| GCA_946478995.1_SRR15094062_bin.6_metawrap_v1.3.0_MAG_genomic      | {'K02298','K02300','K02297','K02299'}                                     | M00417 |
| RDPYD18098980_A_saliva.metaspades.bin.28                           | {'K01834','K00927','K01689','K01803','K00134','K00873'}                   | M00002 |
| RDPYD18201650_A_saliva.metaspades.bin.5                            | {'K01834','K00927','K01689','K01803','K00134','K00873'}                   | M00002 |
| RDPYD18201650_A_saliva.metaspades.bin.5                            | {'K02108','K02115','K02110','K02113','K02109','K02112','K02111','K02114'} | M00157 |
| RDPYD18300081_A_saliva.metaspades.bin.28                           | {'K15633','K00927','K01689','K01803','K00134','K00873'}                   | M00002 |
| RDPYD18300081_A_saliva.metaspades.bin.28                           | {'K00625','K00925'}                                                       | M00579 |
| RSZAXPI002639-98_RA_dental.metaspades.bin.8                        | {'K01834','K00927','K01689','K01803','K00134','K00873'}                   | M00002 |
| RDPYD18088975_A_saliva.metaspades.bin.20                           | {'K01834','K00927','K01689','K01803','K00134','K00873'}                   | M00002 |
| R0170300310_tooth_RAH.megahit.bin.34                               | {'K01834','K00927','K01689','K01803','K00134','K00873'}                   | M00002 |
| GCA_947304155.1_SRR10912535_bin.54_metaWRAP_v1.3_MAG_genomic       | {'K15633','K00927','K01689','K01803','K00873'}                            | M00002 |
| GCA_947304155.1_SRR10912535_bin.54_metaWRAP_v1.3_MAG_genomic       | {'K00625','K00925'}                                                       | M00579 |
| R0170300336_saliva_RA.megahit.bin.72                               | {'K01834','K00927','K01689','K01803','K00134','K00873'}                   | M00002 |
| R0170300183_tooth_RA.megahit.bin.33                                | {'K01834','K00927','K01689','K01803','K00134','K00873'}                   | M00002 |
| SRR8114076.metaspades.bin.27                                       | {'K01834','K00927','K01689','K01803','K00134','K00873'}                   | M00002 |
| SRR8114076.metaspades.bin.27                                       | {'K02108','K02115','K02110','K02113','K02109','K02112','K02111','K02114'} | M00157 |
| GCA_905373385.1_SRR9217464-mag-bin.2_genomic                       | {'K01834','K00927','K01689','K01803','K00134','K00873'}                   | M00002 |
| SZAXPI018312-14_RA_dental.metaspades.bin.87                        | {'K00927','K01689','K01803','K00134','K00873'}                            | M00002 |
| SZAXPI018312-14_RA_dental.metaspades.bin.87                        | {'K02108','K02115','K02110','K02113','K02109','K02112','K02111','K02114'} | M00157 |
| YS000305_saliva.spades.bin.4                                       | {'K01834','K00927','K01689','K01803','K00134','K00873'}                   | M00002 |
| YS000305_saliva.spades.bin.4                                       | {'K02108','K02115','K02110','K02113','K02109','K02112','K02111','K02114'} | M00157 |
| GCA_903859365.1_freshwater_MAG_---_AM-lipid-02-D3_bin-0353_genomic | {'K00927','K01803','K00134','K00873'}                                     | M00002 |
| GCA_903859365.1_freshwater_MAG_---_AM-lipid-02-D3_bin-0353_genomic | {'K02108','K02115','K02110','K02113','K02109','K02112','K02111','K02114'} | M00157 |
| GCA_903859365.1_freshwater_MAG_---_AM-lipid-02-D3_bin-0353_genomic | {'K02298','K02300','K02297','K02299'}                                     | M00417 |
| R0170300060_tooth_RA.megahit.bin.57                                | {'K02108','K02115','K02110','K02113','K02109','K02112','K02111','K02114'} | M00157 |
| R0170300193_tooth_RA.megahit.bin.57                                | {'K00927','K01689','K01803','K00134','K00873'}                            | M00002 |
| R0170300193_tooth_RA.megahit.bin.57                                | {'K02108','K02115','K02110','K02113','K02109','K02112','K02111','K02114'} | M00157 |
| YS001069_saliva.spades.bin.6                                       | {'K01834','K00927','K01689','K01803','K00134','K00873'}                   | M00002 |
| YS001069_saliva.spades.bin.6                                       | {'K02108','K02115','K02110','K02113','K02109','K02112','K02111','K02114'} | M00157 |
| GCA_027326965.1_ASM2732696v1_genomic                               | {'K00927','K01803','K00134','K00873'}                                     | M00002 |
| GCA_027326965.1_ASM2732696v1_genomic                               | {'K02108','K02115','K02110','K02113','K02109','K02112','K02111','K02114'} | M00157 |
| GCA_027326965.1_ASM2732696v1_genomic                               | {'K02298','K02300','K02297','K02299'}                                     | M00417 |
| RSZAXPI002465-98_2_RAH_saliva.metaspades.bin.9                     | {'K01834','K01689','K00134','K00873'}                                     | M00002 |
| RSZAXPI002465-98_2_RAH_saliva.metaspades.bin.9                     | {'K00625','K00925'}                                                       | M00579 |
| R0170300125_tooth_RA.megahit.bin.2                                 | {'K00927','K01689','K01803','K00134','K00873'}                            | M00002 |
| R0170300125_tooth_RA.megahit.bin.2                                 | {'K02108','K02115','K02110','K02113','K02109','K02112','K02111','K02114'} | M00157 |
| RDPYD18300036_A_saliva.metaspades.bin.65                           | {'K01834','K00927','K01689','K01803','K00134','K00873'}                   | M00002 |
| RDPYD18300036_A_saliva.metaspades.bin.65                           | {'K02108','K02115','K02110','K02113','K02109','K02112','K02111','K02114'} | M00157 |
| GCA_002795915.1_ASM279591v1_genomic                                | {'K02108','K02115','K02110','K02113','K02109','K02112','K02111','K02114'} | M00157 |
| GCA_947303945.1_SRR10912540_bin.27_metaWRAP_v1.3_MAG_genomic       | {'K15633','K00927','K01689','K01803','K00134','K00873'}                   | M00002 |
| GCA_947303945.1_SRR10912540_bin.27_metaWRAP_v1.3_MAG_genomic       | {'K00925','K00625','K13788'}                                              | M00579 |
| R0170300264_tooth_RAH.megahit.bin.17                               | {'K15633','K00927','K01689','K01803','K00134','K00873'}                   | M00002 |
| R0170300264_tooth_RAH.megahit.bin.17                               | {'K00625','K00925'}                                                       | M00579 |
| R0170300294_tooth_RAH.megahit.bin.112                              | {'K15633','K00927','K01689','K01803','K00134','K00873'}                   | M00002 |
| R0170300294_tooth_RAH.megahit.bin.112                              | {'K00625','K00925'}                                                       | M00579 |
| RDPYD18098861_A_saliva.metaspades.bin.17                           | {'K01834','K00927','K01689','K01803','K00134','K00873'}                   | M00002 |
| GCA_002788895.1_ASM278889v1_genomic                                | {'K02108','K02115','K02110','K02113','K02109','K02112','K02111','K02114'} | M00157 |
| GCA_027493025.1_ASM2749302v1_genomic                               | {'K01834','K00927','K01689','K01803','K00134','K00873'}                   | M00002 |
| GCA_027493025.1_ASM2749302v1_genomic                               | {'K02108','K02112','K02111','K02115','K02110','K02113','K02114'}          | M00157 |
| RDPYD18098889_A_saliva.metaspades.bin.45                           | {'K00927','K01689','K01803','K00134','K00873'}                            | M00002 |
| RDPYD18098889_A_saliva.metaspades.bin.45                           | {'K02108','K02115','K02110','K02113','K02109','K02112','K02111','K02114'} | M00157 |
| RSZYD18078346_A_saliva.metaspades.bin.17                           | {'K01834','K00927','K01689','K01803','K00134','K00873'}                   | M00002 |
| RSZYD18078346_A_saliva.metaspades.bin.17                           | {'K02109','K02111','K02115','K02113'}                                     | M00157 |
| R0170300285_tooth_RAH.megahit.bin.82                               | {'K01834','K01689','K00873'}                                              | M00002 |
| R0170300285_tooth_RAH.megahit.bin.82                               | {'K02108','K02115','K02110','K02113','K02109','K02112','K02111','K02114'} | M00157 |
| GCA_027427515.1_ASM2742751v1_genomic                               | {'K00927','K01803','K00134','K00873'}                                     | M00002 |
| GCA_027427515.1_ASM2742751v1_genomic                               | {'K02108','K02115','K02110','K02113','K02109','K02112','K02111','K02114'} | M00157 |
| RSZYD18187169_A_saliva.metaspades.bin.33                           | {'K01834','K00927','K01689','K01803','K00134','K00873'}                   | M00002 |
| RSZYD18187169_A_saliva.metaspades.bin.33                           | {'K02108','K02112','K02111','K02115','K02110','K02113','K02114'}          | M00157 |
| RDPYD18300323_A_saliva.metaspades.bin.59                           | {'K01834','K00927','K01689','K01803','K00134','K00873'}                   | M00002 |
| R0170300061_tooth_RA.megahit.bin.113                               | {'K15633','K00927','K01689','K01803','K00134','K00873'}                   | M00002 |
| R0170300061_tooth_RA.megahit.bin.113                               | {'K02108','K02115','K02110','K02113','K02109','K02112','K02111','K02114'} | M00157 |
| GCA_947304825.1_SRR10912542_bin.28_metaWRAP_v1.3_MAG_genomic       | {'K00927','K01689','K01803','K00134','K00873'}                            | M00002 |
| GCA_947304825.1_SRR10912542_bin.28_metaWRAP_v1.3_MAG_genomic       | {'K01897'}                                                                | M00086 |
| GCA_017557805.1_ASM1755780v1_genomic                               | {'K15633','K00927','K01689','K01803','K00134','K00873'}                   | M00002 |
| GCA_017557805.1_ASM1755780v1_genomic                               | {'K00625','K00925'}                                                       | M00579 |
| RDPYD18300089_A_saliva.metaspades.bin.34                           | {'K01834','K01689','K00927','K01803'}                                     | M00002 |
| RDPYD18300089_A_saliva.metaspades.bin.34                           | {'K02108','K02109','K02112','K02115','K02110','K02113','K02114'}          | M00157 |
| GCA_017404935.1                                                    | {'K15633','K00927','K01689','K01803','K00134','K00873'}                   | M00002 |
| GCA_017404935.1                                                    | {'K01897'}                                                                | M00086 |
| GCA_017404935.1                                                    | {'K00925','K13788'}                                                       | M00579 |
| RSZYD18187166_A_saliva.metaspades.bin.15                           | {'K01834','K00927','K01689','K01803','K00134','K00873'}                   | M00002 |
| RSZYD18187166_A_saliva.metaspades.bin.15                           | {'K02108','K02115','K02110','K02113','K02109','K02112','K02111','K02114'} | M00157 |
| R0170300223_tooth_RA.megahit.bin.112                               | {'K00927','K01689','K01803','K00134','K00873'}                            | M00002 |
| R0170300223_tooth_RA.megahit.bin.112                               | {'K02108','K02115','K02110','K02113','K02109','K02112','K02111','K02114'} | M00157 |
| GCA_905372305.1_SRR9217408-mag-bin.12_genomic                      | {'K01834','K00927','K01689','K01803','K00134','K00873'}                   | M00002 |
| GCA_905372305.1_SRR9217408-mag-bin.12_genomic                      | {'K02108','K02109','K02112','K02111','K02115','K02110','K02114'}          | M00157 |
| SZAXPI018433-84_RA_saliva.metaspades.bin.87                        | {'K01834','K00927','K01689','K01803','K00134','K00873'}                   | M00002 |
| GCA_017511205.1                                                    | {'K15633','K00927','K01689','K01803','K00134','K00873'}                   | M00002 |
| GCA_017511205.1                                                    | {'K01897'}                                                                | M00086 |
| GCA_017511205.1                                                    | {'K00925','K00625','K13788'}                                              | M00579 |
| GCA_002344735.1_ASM234473v1_genomic                                | {'K00927','K01803','K00134','K00873'}                                     | M00002 |
| GCA_002344735.1_ASM234473v1_genomic                                | {'K02108','K02115','K02110','K02113','K02109','K02112','K02111','K02114'} | M00157 |
| GCA_002344735.1_ASM234473v1_genomic                                | {'K02298','K02300','K02297','K02299'}                                     | M00417 |
| RSZAXPI002306-15_2_RAH_saliva.metaspades.bin.36                    | {'K01834','K00927','K01689','K01803','K00134','K00873'}                   | M00002 |
| R0170300268_tooth_RAH.megahit.bin.13                               | {'K01834','K01689','K01803','K00134','K00873'}                            | M00002 |
| R0170300268_tooth_RAH.megahit.bin.13                               | {'K02108','K02115','K02110','K02113','K02109','K02112','K02111','K02114'} | M00157 |
| RDPYD18088984_A_saliva.metaspades.bin.13                           | {'K01834','K00927','K01689','K01803','K00134','K00873'}                   | M00002 |
| RDPYD18088984_A_saliva.metaspades.bin.13                           | {'K02109','K02112','K02111','K02110','K02113','K02114'}                   | M00157 |
| SZAXPI018181-37_RA_dental.metaspades.bin.33                        | {'K01834','K00927','K01689','K01803','K00134','K00873'}                   | M00002 |
| YS000324_saliva.spades.bin.7                                       | {'K01834','K00927','K01689','K01803','K00134','K00873'}                   | M00002 |
| YS000324_saliva.spades.bin.7                                       | {'K02108','K02115','K02110','K02113','K02109','K02112','K02111','K02114'} | M00157 |
| GCA_015999875.1_ASM1599987v1_genomic                               | {'K00927','K15634','K01803','K00134','K00873'}                            | M00002 |



|                                                             |                                                                                  |        |
|-------------------------------------------------------------|----------------------------------------------------------------------------------|--------|
| GCA_015999875.1_ASM1599987v1_genomic                        | {'K02108', 'K02115', 'K02110', 'K02113', 'K02109', 'K02112', 'K02111', 'K02114'} | M00157 |
| GCA_015999875.1_ASM1599987v1_genomic                        | {'K02298', 'K02300', 'K02297', 'K02299'}                                         | M00417 |
| SZAXPI018285-113_RA_dental.metaspades.bin.57                | {'K01834', 'K01689', 'K00873'}                                                   | M00002 |
| SZAXPI018285-113_RA_dental.metaspades.bin.57                | {'K02108', 'K02115', 'K02110', 'K02113', 'K02109', 'K02112', 'K02111', 'K02114'} | M00157 |
| R0170300318_tooth_RAH.megahit.bin.108                       | {'K15633', 'K00927', 'K01689', 'K01803', 'K00134', 'K00873'}                     | M00002 |
| R0170300318_tooth_RAH.megahit.bin.108                       | {'K00625', 'K00925'}                                                             | M00579 |
| SZAXPI018322-24_RA_dental.metaspades.bin.44                 | {'K01834', 'K01689', 'K01803', 'K00134', 'K00873'}                               | M00002 |
| SZAXPI018322-24_RA_dental.metaspades.bin.44                 | {'K02108', 'K02115', 'K02110', 'K02113', 'K02109', 'K02112', 'K02111', 'K02114'} | M00157 |
| R0170300170_tooth_RA.megahit.bin.6                          | {'K15633', 'K00927', 'K01689', 'K01803', 'K00134', 'K00873'}                     | M00002 |
| R0170300170_tooth_RA.megahit.bin.6                          | {'K00925', 'K00625', 'K13788'}                                                   | M00579 |
| R0170300285_tooth_RAH.megahit.bin.89                        | {'K00927', 'K01689', 'K01803', 'K00134', 'K00873'}                               | M00002 |
| R0170300285_tooth_RAH.megahit.bin.89                        | {'K02108', 'K02115', 'K02110', 'K02113', 'K02109', 'K02112', 'K02111', 'K02114'} | M00157 |
| GCA_903839435.1_freshwater_MAG_---_Kiruna_bin-08663_genomic | {'K00927', 'K01803', 'K00134', 'K00873'}                                         | M00002 |
| GCA_903839435.1_freshwater_MAG_---_Kiruna_bin-08663_genomic | {'K02108', 'K02112', 'K02111', 'K02115', 'K02110', 'K02114'}                     | M00157 |
| GCA_903839435.1_freshwater_MAG_---_Kiruna_bin-08663_genomic | {'K02297'}                                                                       | M00417 |
| R0170300067_tooth_RA.megahit.bin.1                          | {'K00927', 'K01689', 'K01803', 'K00134', 'K00873'}                               | M00002 |
| R0170300067_tooth_RA.megahit.bin.1                          | {'K02108', 'K02115', 'K02110', 'K02113', 'K02109', 'K02112', 'K02111', 'K02114'} | M00157 |
| GCA_017460225.1                                             | {'K15633', 'K00927', 'K01689', 'K01803', 'K00134', 'K00873'}                     | M00002 |
| GCA_017460225.1                                             | {'K01897'}                                                                       | M00086 |
| RSZAXPI002633-90_RA_dental.metaspades.bin.54                | {'K01834', 'K00927', 'K01689', 'K01803', 'K00134', 'K00873'}                     | M00002 |
| GCA_015257665.1_ASM1525766v1_genomic                        | {'K01834', 'K01689', 'K00873'}                                                   | M00002 |
| GCA_015257665.1_ASM1525766v1_genomic                        | {'K02108', 'K02115', 'K02110', 'K02113', 'K02109', 'K02112', 'K02111', 'K02114'} | M00157 |
| R0170300061_tooth_RA.megahit.bin.55                         | {'K01834', 'K00927', 'K01689', 'K01803', 'K00134', 'K00873'}                     | M00002 |
| RSZYD18078579_A_saliva.metaspades.bin.26                    | {'K01834', 'K00927', 'K01689', 'K01803', 'K00134', 'K00873'}                     | M00002 |
| RDPYD18201775_A_saliva.metaspades.bin.17                    | {'K01834', 'K00927', 'K01803', 'K00873'}                                         | M00002 |
| RSZYD18078531_A_saliva.metaspades.bin.36                    | {'K01834', 'K00927', 'K01689', 'K01803', 'K00134', 'K00873'}                     | M00002 |
| RSZYD18078531_A_saliva.metaspades.bin.36                    | {'K02108', 'K02115', 'K02110', 'K02113', 'K02109', 'K02112', 'K02111', 'K02114'} | M00157 |
| RSZYD18187409_A_saliva.metaspades.bin.8                     | {'K01834', 'K00927', 'K01689', 'K01803', 'K00873'}                               | M00002 |
| RSZYD18187409_A_saliva.metaspades.bin.8                     | {'K02108', 'K02109', 'K02110'}                                                   | M00157 |
| GCA_000803625.1_ASM80362v1_genomic                          | {'K01834', 'K00927', 'K01689', 'K01803', 'K00134', 'K00873'}                     | M00002 |
| GCA_000803625.1_ASM80362v1_genomic                          | {'K02108', 'K02115', 'K02110', 'K02113', 'K02109', 'K02112', 'K02111', 'K02114'} | M00157 |
| RSZAXPI002479-169_RAH_saliva.metaspades.bin.73              | {'K15633', 'K00927', 'K01689', 'K01803', 'K00134', 'K00873'}                     | M00002 |
| RSZAXPI002479-169_RAH_saliva.metaspades.bin.73              | {'K00625', 'K00925'}                                                             | M00579 |
| RDPYD18098375_A_saliva.metaspades.bin.22                    | {'K01834', 'K00927', 'K01689', 'K01803', 'K00134', 'K00873'}                     | M00002 |
| YS000029_saliva.spades.bin.8                                | {'K01834', 'K00927', 'K01689', 'K01803', 'K00134', 'K00873'}                     | M00002 |
| YS000029_saliva.spades.bin.8                                | {'K02108', 'K02115', 'K02110', 'K02113', 'K02109', 'K02112', 'K02111', 'K02114'} | M00157 |
| GCA_002452155.1_ASM245215v1_genomic                         | {'K02108', 'K02115', 'K02110', 'K02113', 'K02109', 'K02112', 'K02111', 'K02114'} | M00157 |
| GCA_027427715.1_ASM2742771v1_genomic                        | {'K00927', 'K01803', 'K00134', 'K00873'}                                         | M00002 |
| GCA_027427715.1_ASM2742771v1_genomic                        | {'K02108', 'K02115', 'K02110', 'K02113', 'K02109', 'K02112', 'K02111', 'K02114'} | M00157 |
| RDPYD18098585_A_saliva.metaspades.bin.25                    | {'K15633', 'K00927', 'K01689', 'K01803', 'K00134', 'K00873'}                     | M00002 |
| RDPYD18098585_A_saliva.metaspades.bin.25                    | {'K00625', 'K00925'}                                                             | M00579 |
| YS000651_saliva.spades.bin.17                               | {'K01834', 'K00927', 'K01689', 'K01803', 'K00134', 'K00873'}                     | M00002 |
| YS000651_saliva.spades.bin.17                               | {'K02108', 'K02115', 'K02110', 'K02113', 'K02109', 'K02112', 'K02111', 'K02114'} | M00157 |
| RDPYD18093589_A_saliva.metaspades.bin.27                    | {'K01834', 'K00927', 'K01689', 'K01803', 'K00134', 'K00873'}                     | M00002 |
| RDPYD18093589_A_saliva.metaspades.bin.27                    | {'K02108', 'K02115', 'K02110', 'K02113', 'K02109', 'K02112', 'K02111', 'K02114'} | M00157 |
| R0170300279_tooth_RAH.megahit.bin.111                       | {'K01834', 'K00927', 'K01689', 'K01803', 'K00134', 'K00873'}                     | M00002 |
| R0170300279_tooth_RAH.megahit.bin.111                       | {'K02108', 'K02115', 'K02110', 'K02113', 'K02109', 'K02112', 'K02111', 'K02114'} | M00157 |
| GCA_013333375.2_ASM1333337v2_genomic                        | {'K15633', 'K00927', 'K01689', 'K01803', 'K00134', 'K00873'}                     | M00002 |
| GCA_013333375.2_ASM1333337v2_genomic                        | {'K00625', 'K00925'}                                                             | M00579 |
| GCA_927911635.1_ERR3827207_bin.3_metaWRAP_v1.1_MAG_genomic  | {'K02108', 'K02115', 'K02110', 'K02113', 'K02109', 'K02112', 'K02111', 'K02114'} | M00157 |
| R0170300104_tooth_RA.megahit.bin.11                         | {'K02108', 'K02115', 'K02110', 'K02113', 'K02109', 'K02112', 'K02111', 'K02114'} | M00157 |
| R0170300092_tooth_RA.megahit.bin.66                         | {'K00927', 'K01689', 'K01803', 'K00134', 'K00873'}                               | M00002 |
| R0170300092_tooth_RA.megahit.bin.66                         | {'K02108', 'K02115', 'K02110', 'K02113', 'K02109', 'K02112', 'K02111', 'K02114'} | M00157 |
| RDPYD18201683_A_saliva.metaspades.bin.7                     | {'K01834', 'K00927', 'K01689', 'K01803', 'K00134', 'K00873'}                     | M00002 |
| R0170300170_tooth_RA.megahit.bin.97                         | {'K15633', 'K00927', 'K01689', 'K01803', 'K00134', 'K00873'}                     | M00002 |
| R0170300170_tooth_RA.megahit.bin.97                         | {'K02108', 'K02115', 'K02110', 'K02113', 'K02109', 'K02112', 'K02111', 'K02114'} | M00157 |
| SZAXPI018273-75_RA_dental.metaspades.bin.34                 | {'K15633', 'K00927', 'K01689', 'K01803', 'K00134', 'K00873'}                     | M00002 |
| SZAXPI018273-75_RA_dental.metaspades.bin.34                 | {'K00625', 'K00925'}                                                             | M00579 |
| R0170300079_tooth_RA.megahit.bin.18                         | {'K15633', 'K00927', 'K01803', 'K00134', 'K00873'}                               | M00002 |
| R0170300079_tooth_RA.megahit.bin.18                         | {'K00625', 'K00925'}                                                             | M00579 |
| RSZAXPI002460-93_RAH_saliva.metaspades.bin.2                | {'K01834', 'K00927', 'K01689', 'K01803', 'K00134', 'K00873'}                     | M00002 |
| RSZAXPI002460-93_RAH_saliva.metaspades.bin.2                | {'K02108', 'K02115', 'K02110', 'K02113', 'K02109', 'K02112', 'K02111', 'K02114'} | M00157 |
| RSZAXPI002633-90_RA_dental.metaspades.bin.41                | {'K00927', 'K01689', 'K01803', 'K00134', 'K00873'}                               | M00002 |
| RSZAXPI002633-90_RA_dental.metaspades.bin.41                | {'K02108', 'K02115', 'K02110', 'K02113', 'K02109', 'K02112', 'K02111', 'K02114'} | M00157 |
| R0170300294_tooth_RAH.megahit.bin.42                        | {'K15633', 'K00927', 'K01689', 'K01803', 'K00134', 'K00873'}                     | M00002 |
| R0170300294_tooth_RAH.megahit.bin.42                        | {'K02108', 'K02115', 'K02110', 'K02113', 'K02109', 'K02112', 'K02111', 'K02114'} | M00157 |
| R0170300263_tooth_RAH.megahit.bin.26                        | {'K01834', 'K00927', 'K01689', 'K01803', 'K00134', 'K00873'}                     | M00002 |
| RDPYD18189869_A_saliva.metaspades.bin.73                    | {'K01834', 'K00927', 'K01689', 'K01803', 'K00134', 'K00873'}                     | M00002 |
| RDPYD18189869_A_saliva.metaspades.bin.73                    | {'K02108', 'K02115', 'K02110', 'K02113', 'K02109', 'K02112', 'K02111', 'K02114'} | M00157 |
| R0170300179_tooth_RA.megahit.bin.15                         | {'K01834', 'K01689', 'K00873'}                                                   | M00002 |
| R0170300179_tooth_RA.megahit.bin.15                         | {'K02108', 'K02115', 'K02110', 'K02113', 'K02109', 'K02112', 'K02111', 'K02114'} | M00157 |
| SZAXPI018357-22_RA_saliva.metaspades.bin.71                 | {'K00927', 'K01689', 'K01803', 'K00134', 'K00873'}                               | M00002 |
| SZAXPI018357-22_RA_saliva.metaspades.bin.71                 | {'K02108', 'K02115', 'K02110', 'K02113', 'K02109', 'K02112', 'K02111', 'K02114'} | M00157 |
| R0170300068_tooth_RA.megahit.bin.89                         | {'K00927', 'K01689', 'K01803', 'K00134', 'K00873'}                               | M00002 |
| R0170300068_tooth_RA.megahit.bin.89                         | {'K02108', 'K02115', 'K02110', 'K02113', 'K02109', 'K02112', 'K02111', 'K02114'} | M00157 |
| SZAXPI018312-14_RA_dental.metaspades.bin.62                 | {'K15633', 'K00927', 'K01689', 'K01803', 'K00134', 'K00873'}                     | M00002 |
| SZAXPI018312-14_RA_dental.metaspades.bin.62                 | {'K00625', 'K00925'}                                                             | M00579 |
| SZAXPI018284-111_RA_dental.metaspades.bin.3                 | {'K01834', 'K00927', 'K01689', 'K01803', 'K00134', 'K00873'}                     | M00002 |
| RSZAXPI002606-27_RA_dental.metaspades.bin.59                | {'K15633', 'K00927', 'K01689', 'K01803', 'K00134', 'K00873'}                     | M00002 |
| RSZAXPI002606-27_RA_dental.metaspades.bin.59                | {'K02108', 'K02115', 'K02110', 'K02113', 'K02109', 'K02112', 'K02111', 'K02114'} | M00157 |
| R0170300213_tooth_RA.megahit.bin.30                         | {'K01834', 'K01689', 'K01803', 'K00134', 'K00873'}                               | M00002 |
| R0170300213_tooth_RA.megahit.bin.30                         | {'K02108', 'K02115', 'K02110', 'K02113', 'K02109', 'K02112', 'K02111', 'K02114'} | M00157 |
| RDPYD18088975_A_saliva.metaspades.bin.3                     | {'K01834', 'K00927', 'K01689', 'K01803', 'K00134', 'K00873'}                     | M00002 |
| RDPYD18099019_A_saliva.metaspades.bin.28                    | {'K01834', 'K00927', 'K01689', 'K01803', 'K00134', 'K00873'}                     | M00002 |
| RDPYD18099019_A_saliva.metaspades.bin.28                    | {'K02108', 'K02115', 'K02110', 'K02113', 'K02109', 'K02112', 'K02111', 'K02114'} | M00157 |
| GCA_017482785.1                                             | {'K15633', 'K00927', 'K01689', 'K01803', 'K00134', 'K00873'}                     | M00002 |
| GCA_017482785.1                                             | {'K01897'}                                                                       | M00086 |
| GCA_015999845.1_ASM1599984v1_genomic                        | {'K00927', 'K01803', 'K00134', 'K00873'}                                         | M00002 |
| GCA_015999845.1_ASM1599984v1_genomic                        | {'K02108', 'K02115', 'K02110', 'K02113', 'K02109', 'K02112', 'K02111', 'K02114'} | M00157 |
| SZAXPI018181-37_RA_dental.metaspades.bin.31                 | {'K01834', 'K00927', 'K01689', 'K01803', 'K00134', 'K00873'}                     | M00002 |
| SZAXPI018181-37_RA_dental.metaspades.bin.31                 | {'K02108', 'K02109', 'K02112', 'K02111', 'K02115', 'K02110', 'K02114'}           | M00157 |
| R0170300156_tooth_RA.megahit.bin.91                         | {'K00927', 'K01689', 'K01803', 'K00134', 'K00873'}                               | M00002 |
| R0170300156_tooth_RA.megahit.bin.91                         | {'K02108', 'K02115', 'K02110', 'K02113', 'K02109', 'K02112', 'K02111', 'K02114'} | M00157 |
| R0170300313_tooth_RAH.megahit.bin.7                         | {'K15633', 'K00927', 'K01689', 'K01803', 'K00134', 'K00873'}                     | M00002 |
| R0170300313_tooth_RAH.megahit.bin.7                         | {'K00625', 'K00925'}                                                             | M00579 |
| GCA_903847695.1_freshwater_MAG_---_YR_bin-4361_genomic      | {'K00927', 'K01803', 'K00134', 'K00873'}                                         | M00002 |
| GCA_903847695.1_freshwater_MAG_---_YR_bin-4361_genomic      | {'K02108', 'K02115', 'K02110', 'K02113', 'K02109', 'K02112', 'K02111', 'K02114'} | M00157 |
| RSZAXPI002321-33_RAH_dental.metaspades.bin.23               | {'K01834', 'K01689', 'K00873'}                                                   | M00002 |
| RSZAXPI002321-33_RAH_dental.metaspades.bin.23               | {'K02108', 'K02115', 'K02110', 'K02113', 'K02109', 'K02112', 'K02111', 'K02114'} | M00157 |
| GCA_017433845.1                                             | {'K15633', 'K00927', 'K01689', 'K01803', 'K00134', 'K00873'}                     | M00002 |
| GCA_017433845.1                                             | {'K00925', 'K00625', 'K13788'}                                                   | M00579 |
| R0170300147_tooth_RA.megahit.bin.4                          | {'K01834', 'K01689', 'K00873'}                                                   | M00002 |
| R0170300147_tooth_RA.megahit.bin.4                          | {'K02108', 'K02115', 'K02110', 'K02113', 'K02109', 'K02112', 'K02111', 'K02114'} | M00157 |
| YS000127_saliva.spades.bin.16                               | {'K00927', 'K01689', 'K01803', 'K00134', 'K00873'}                               | M00002 |
| YS000127_saliva.spades.bin.16                               | {'K02108', 'K02115', 'K02110', 'K02113', 'K02109', 'K02112', 'K02111', 'K02114'} | M00157 |

|                                              |                                                                                  |        |
|----------------------------------------------|----------------------------------------------------------------------------------|--------|
| GCA_017506895.1                              | {'K15633', 'K00927', 'K01689', 'K01803', 'K00134', 'K00873'}                     | M00002 |
| GCA_017506895.1                              | {'K01897'}                                                                       | M00086 |
| GCA_017506895.1                              | {'K00625', 'K00925'}                                                             | M00579 |
| R0170300136_tooth_RA.megahit.bin.76          | {'K01834', 'K00927', 'K01689', 'K01803', 'K00134', 'K00873'}                     | M00002 |
| R0170300136_tooth_RA.megahit.bin.76          | {'K02108', 'K02115', 'K02110', 'K02113', 'K02109', 'K02112', 'K02111', 'K02114'} | M00157 |
| YS000143_saliva.spades.bin.5                 | {'K01834', 'K00927', 'K01689', 'K01803', 'K00134', 'K00873'}                     | M00002 |
| YS000143_saliva.spades.bin.5                 | {'K02108', 'K02115', 'K02110', 'K02113', 'K02109', 'K02112', 'K02111', 'K02114'} | M00157 |
| GCA_002839415.1_ASM283941v1_genomic          | {'K15633', 'K01689', 'K01803', 'K00134', 'K00873'}                               | M00002 |
| GCA_002839415.1_ASM283941v1_genomic          | {'K02108', 'K02115', 'K02110', 'K02113', 'K02109', 'K02112', 'K02111', 'K02114'} | M00157 |
| SRR6748163.metaspades.bin.10                 | {'K01834', 'K00927', 'K01689', 'K01803', 'K00134', 'K00873'}                     | M00002 |
| SRR6748163.metaspades.bin.10                 | {'K02108', 'K02115', 'K02110', 'K02113', 'K02109', 'K02112', 'K02111', 'K02114'} | M00157 |
| YS001157_saliva.spades.bin.8                 | {'K01834', 'K00927', 'K01689', 'K01803', 'K00134', 'K00873'}                     | M00002 |
| YS001157_saliva.spades.bin.8                 | {'K02108', 'K02115', 'K02110', 'K02113', 'K02109', 'K02112', 'K02111', 'K02114'} | M00157 |
| GCA_002421965.1_ASM242196v1_genomic          | {'K01834', 'K00927', 'K01689', 'K01803', 'K00134', 'K00873'}                     | M00002 |
| GCA_002421965.1_ASM242196v1_genomic          | {'K02108', 'K02115', 'K02110', 'K02113', 'K02109', 'K02112', 'K02111', 'K02114'} | M00157 |
| GCA_003133385.1_20120500_P26_genomic         | {'K00927', 'K15634', 'K01803', 'K00134', 'K00873'}                               | M00002 |
| GCA_003133385.1_20120500_P26_genomic         | {'K02108', 'K02115', 'K02110', 'K02113', 'K02109', 'K02112', 'K02111', 'K02114'} | M00157 |
| GCA_003133385.1_20120500_P26_genomic         | {'K02298', 'K02300', 'K02297', 'K02299'}                                         | M00417 |
| GCA_017457925.1                              | {'K15633', 'K00927', 'K15634', 'K01689', 'K01803', 'K00134', 'K00873'}           | M00002 |
| GCA_017457925.1                              | {'K01897'}                                                                       | M00086 |
| GCA_017457925.1                              | {'K00925', 'K00625', 'K13788'}                                                   | M00579 |
| GCA_027426695.1_ASM2742669v1_genomic         | {'K15634', 'K00927', 'K01803', 'K00134'}                                         | M00002 |
| GCA_027426695.1_ASM2742669v1_genomic         | {'K02108', 'K02115', 'K02110', 'K02113', 'K02109', 'K02112', 'K02111', 'K02114'} | M00157 |
| RDPYD18300202_A_saliva.metaspades.bin.45     | {'K01834', 'K00927', 'K01689', 'K01803', 'K00134', 'K00873'}                     | M00002 |
| GCA_016112465.1_ASM1611246v1_genomic         | {'K15633', 'K00927', 'K01803', 'K00134', 'K00873'}                               | M00002 |
| GCA_016112465.1_ASM1611246v1_genomic         | {'K00625', 'K00925'}                                                             | M00579 |
| GCA_017405225.1                              | {'K15633', 'K00927', 'K01689', 'K01803', 'K00134', 'K00873'}                     | M00002 |
| SZAXPI011699-166_RA_dental.metaspades.bin.58 | {'K15633', 'K00927', 'K01689', 'K01803', 'K00134', 'K00873'}                     | M00002 |
| SZAXPI011699-166_RA_dental.metaspades.bin.58 | {'K00625', 'K00925'}                                                             | M00579 |
| R0170300267_tooth_RAH.megahit.bin.37         | {'K01834', 'K01689', 'K01803', 'K00134', 'K00873'}                               | M00002 |
| R0170300267_tooth_RAH.megahit.bin.37         | {'K02108', 'K02115', 'K02110', 'K02113', 'K02109', 'K02112', 'K02111', 'K02114'} | M00157 |
| R0170300165_tooth_RA.megahit.bin.3           | {'K15633', 'K00927', 'K01689', 'K01803', 'K00134', 'K00873'}                     | M00002 |
| R0170300165_tooth_RA.megahit.bin.3           | {'K00625', 'K00925'}                                                             | M00579 |
| YS000926_saliva.spades.bin.2                 | {'K01834', 'K00927', 'K01689', 'K01803', 'K00134', 'K00873'}                     | M00002 |
| YS000926_saliva.spades.bin.2                 | {'K02108', 'K02109', 'K02112', 'K02111', 'K02115', 'K02110', 'K02113'}           | M00157 |
| RSZYD18187200_A_saliva.metaspades.bin.37     | {'K01834', 'K00927', 'K01689', 'K01803', 'K00134', 'K00873'}                     | M00002 |
| RSZYD18187200_A_saliva.metaspades.bin.37     | {'K02108', 'K02115', 'K02110', 'K02113', 'K02109', 'K02112', 'K02111', 'K02114'} | M00157 |
| RSZYD18187503_A_saliva.metaspades.bin.19     | {'K15633', 'K00927', 'K01689', 'K01803', 'K00134', 'K00873'}                     | M00002 |
| RSZYD18187503_A_saliva.metaspades.bin.19     | {'K00625', 'K00925'}                                                             | M00579 |
| RSZYD18078311_A_saliva.metaspades.bin.7      | {'K01834', 'K00927', 'K01689', 'K01803', 'K00134', 'K00873'}                     | M00002 |
| RSZYD18078311_A_saliva.metaspades.bin.7      | {'K02108', 'K02109', 'K02112', 'K02111', 'K02115', 'K02113', 'K02114'}           | M00157 |
| YS000587_saliva.spades.bin.10                | {'K01834', 'K00927', 'K01689', 'K01803', 'K00134', 'K00873'}                     | M00002 |
| YS000587_saliva.spades.bin.10                | {'K02108', 'K02115', 'K02110', 'K02113', 'K02109', 'K02112', 'K02111', 'K02114'} | M00157 |
| R0170300196_tooth_RA.megahit.bin.46          | {'K02108', 'K02115', 'K02110', 'K02113', 'K02109', 'K02112', 'K02111', 'K02114'} | M00157 |
| R0170300065_tooth_RA.megahit.bin.79          | {'K00927', 'K01689', 'K01803', 'K00134', 'K00873'}                               | M00002 |
| R0170300097_tooth_RA.megahit.bin.6           | {'K00927', 'K01689', 'K01803', 'K00134', 'K00873'}                               | M00002 |
| R0170300097_tooth_RA.megahit.bin.6           | {'K02108', 'K02115', 'K02110', 'K02113', 'K02109', 'K02112', 'K02111', 'K02114'} | M00157 |
| GCA_946893605.1_PRJEB56001_genomic           | {'K01834', 'K00927', 'K01689', 'K01803', 'K00134', 'K00873'}                     | M00002 |
| GCA_946893605.1_PRJEB56001_genomic           | {'K02108', 'K02115', 'K02110', 'K02113', 'K02109', 'K02112', 'K02111', 'K02114'} | M00157 |
| GCA_012965045.1_ASM1296504v1_genomic         | {'K00927', 'K01689', 'K01803', 'K00134', 'K00873'}                               | M00002 |
| GCA_012965045.1_ASM1296504v1_genomic         | {'K02108', 'K02115', 'K02110', 'K02113', 'K02109', 'K02112', 'K02111', 'K02114'} | M00157 |
| GCA_002952755.1_ASM295275v1_genomic          | {'K01834', 'K00927', 'K01689', 'K01803', 'K00134', 'K00873'}                     | M00002 |
| GCA_002952755.1_ASM295275v1_genomic          | {'K02108', 'K02115', 'K02110', 'K02113', 'K02109', 'K02112', 'K02111', 'K02114'} | M00157 |
| GCA_002952755.1_ASM295275v1_genomic          | {'K02298', 'K02300', 'K02297', 'K02299'}                                         | M00417 |
| SZAXPI018174-30_RA_dental.metaspades.bin.36  | {'K01834', 'K00927', 'K01689', 'K01803', 'K00134', 'K00873'}                     | M00002 |
| SZAXPI018174-30_RA_dental.metaspades.bin.36  | {'K02112', 'K02111', 'K02115', 'K02114'}                                         | M00157 |
| RSZYD18078482_A_saliva.metaspades.bin.17     | {'K01834', 'K00927', 'K01689', 'K01803', 'K00134', 'K00873'}                     | M00002 |
| GCA_020428315.1_ASM2042831v1_genomic         | {'K02108', 'K02115', 'K02110', 'K02113', 'K02109', 'K02112', 'K02111', 'K02114'} | M00157 |
| GCA_020428315.1_ASM2042831v1_genomic         | {'K02298', 'K02300', 'K02297', 'K02299'}                                         | M00417 |
| YS000871_saliva.spades.bin.22                | {'K01834', 'K00927', 'K01689', 'K01803', 'K00134', 'K00873'}                     | M00002 |
| YS000871_saliva.spades.bin.22                | {'K02108', 'K02115', 'K02110', 'K02113', 'K02109', 'K02112', 'K02111', 'K02114'} | M00157 |
| R0170300222_tooth_RA.megahit.bin.35          | {'K01834', 'K01689', 'K01803', 'K00134', 'K00873'}                               | M00002 |
| R0170300222_tooth_RA.megahit.bin.35          | {'K02108', 'K02115', 'K02110', 'K02113', 'K02109', 'K02112', 'K02111', 'K02114'} | M00157 |
| GCA_016196105.1_ASM1619610v1_genomic         | {'K00927', 'K01803', 'K00134', 'K00873'}                                         | M00002 |
| GCA_016196105.1_ASM1619610v1_genomic         | {'K02108', 'K02115', 'K02110', 'K02113', 'K02109', 'K02112', 'K02111', 'K02114'} | M00157 |
| GCA_016196105.1_ASM1619610v1_genomic         | {'K02298', 'K02300', 'K02297', 'K02299'}                                         | M00417 |
| SZAXPI018097-18_RA_dental.metaspades.bin.33  | {'K00927', 'K01689', 'K01803', 'K00134', 'K00873'}                               | M00002 |
| SZAXPI018097-18_RA_dental.metaspades.bin.33  | {'K02108', 'K02115', 'K02110', 'K02113', 'K02109', 'K02112', 'K02111', 'K02114'} | M00157 |
| GCA_016183515.1_ASM1618351v1_genomic         | {'K02108', 'K02115', 'K02110', 'K02113', 'K02109', 'K02112', 'K02111', 'K02114'} | M00157 |
| GCA_016183515.1_ASM1618351v1_genomic         | {'K02298', 'K02300', 'K02299'}                                                   | M00417 |
| GCA_017460105.1                              | {'K01689', 'K00927', 'K00134', 'K00873'}                                         | M00002 |
| GCA_017460105.1                              | {'K01897'}                                                                       | M00086 |
| SZAXPI018277-90_RA_dental.metaspades.bin.26  | {'K00927', 'K01689', 'K01803', 'K00134', 'K00873'}                               | M00002 |
| SZAXPI018277-90_RA_dental.metaspades.bin.26  | {'K02108', 'K02115', 'K02110', 'K02113', 'K02109', 'K02112', 'K02111', 'K02114'} | M00157 |
| RDPYD18088951_A_saliva.metaspades.bin.87     | {'K15633', 'K00927', 'K01803', 'K00134', 'K00873'}                               | M00002 |
| RDPYD18088951_A_saliva.metaspades.bin.87     | {'K00625', 'K00925'}                                                             | M00579 |
| R0170300252_tooth_RAH.megahit.bin.79         | {'K15633', 'K00927', 'K01689', 'K01803', 'K00134', 'K00873'}                     | M00002 |
| R0170300252_tooth_RAH.megahit.bin.79         | {'K00625', 'K00925'}                                                             | M00579 |
| GCA_017536895.1_ASM1753689v1_genomic         | {'K15633', 'K00927', 'K01689', 'K01803', 'K00134', 'K00873'}                     | M00002 |
| GCA_017536895.1_ASM1753689v1_genomic         | {'K01897'}                                                                       | M00086 |
| GCA_017536895.1_ASM1753689v1_genomic         | {'K00625', 'K00925'}                                                             | M00579 |
| RSZAXPI002617-32_RA_dental.metaspades.bin.20 | {'K00927', 'K01689', 'K01803', 'K00134', 'K00873'}                               | M00002 |
| RSZAXPI002617-32_RA_dental.metaspades.bin.20 | {'K02108', 'K02115', 'K02110', 'K02113', 'K02109', 'K02112', 'K02111', 'K02114'} | M00157 |
| RDPYD18123870_A_saliva.metaspades.bin.24     | {'K15633', 'K00927', 'K01689', 'K01803', 'K00134', 'K00873'}                     | M00002 |
| RDPYD18123870_A_saliva.metaspades.bin.24     | {'K00625', 'K00925'}                                                             | M00579 |
| RSZAXPI002636-95_RA_dental.metaspades.bin.12 | {'K01834', 'K01689', 'K01803', 'K00134', 'K00873'}                               | M00002 |
| RSZAXPI002636-95_RA_dental.metaspades.bin.12 | {'K02108', 'K02115', 'K02110', 'K02113', 'K02109', 'K02112', 'K02111', 'K02114'} | M00157 |
| RSZYD18187669_A_saliva.metaspades.bin.34     | {'K01834', 'K00927', 'K01689', 'K01803', 'K00134', 'K00873'}                     | M00002 |
| RSZYD18187669_A_saliva.metaspades.bin.34     | {'K02108', 'K02115', 'K02110', 'K02113', 'K02109', 'K02112', 'K02111', 'K02114'} | M00157 |
| RSZYD18187466_A_saliva.metaspades.bin.39     | {'K01834', 'K00927', 'K01689', 'K01803', 'K00134'}                               | M00002 |
| RSZYD18187466_A_saliva.metaspades.bin.39     | {'K02112', 'K02115', 'K02114'}                                                   | M00157 |
| SZAXPI018172-26_RA_dental.metaspades.bin.42  | {'K00927', 'K01689', 'K01803', 'K00134', 'K00873'}                               | M00002 |
| SZAXPI018172-26_RA_dental.metaspades.bin.42  | {'K02108', 'K02115', 'K02110', 'K02113', 'K02109', 'K02112', 'K02111', 'K02114'} | M00157 |
| YS000927_saliva.spades.bin.50                | {'K01834', 'K00927', 'K01689', 'K01803', 'K00134', 'K00873'}                     | M00002 |
| YS000927_saliva.spades.bin.50                | {'K02108', 'K02115', 'K02110', 'K02113', 'K02109', 'K02112', 'K02111', 'K02114'} | M00157 |
| GCA_027427395.1_ASM2742739v1_genomic         | {'K15634', 'K00927', 'K01803', 'K00134'}                                         | M00002 |
| GCA_027427395.1_ASM2742739v1_genomic         | {'K02108', 'K02115', 'K02110', 'K02113', 'K02109', 'K02112', 'K02111', 'K02114'} | M00157 |
| RSZAXPI002311-20_RAH_dental.metaspades.bin.6 | {'K02108', 'K02115', 'K02110', 'K02113', 'K02109', 'K02112', 'K02111', 'K02114'} | M00157 |
| YS000678_saliva.spades.bin.12                | {'K01834', 'K00927', 'K01689', 'K01803', 'K00134', 'K00873'}                     | M00002 |
| YS000678_saliva.spades.bin.12                | {'K02108', 'K02115', 'K02110', 'K02113', 'K02109', 'K02112', 'K02111', 'K02114'} | M00157 |
| R0170300320_tooth_RAH.megahit.bin.4          | {'K00927', 'K01689', 'K01803', 'K00134', 'K00873'}                               | M00002 |
| R0170300320_tooth_RAH.megahit.bin.4          | {'K02108', 'K02115', 'K02110', 'K02113', 'K02109', 'K02112', 'K02111', 'K02114'} | M00157 |
| GCA_016283505.1_ASM1628350v1_genomic         | {'K00927', 'K01689', 'K01803', 'K00134', 'K00873'}                               | M00002 |
| GCA_016283505.1_ASM1628350v1_genomic         | {'K01897'}                                                                       | M00086 |
| GCA_016283505.1_ASM1628350v1_genomic         | {'K00625', 'K00925'}                                                             | M00579 |



|                                                              |                                                                                  |        |
|--------------------------------------------------------------|----------------------------------------------------------------------------------|--------|
| GCA_946998385.1_SRR16916860_bin.6_metaWRAP_v1.3_MAG_genomic  | {'K01834', 'K00927', 'K01689', 'K01803', 'K00134', 'K00873'}                     | M00002 |
| GCA_946998385.1_SRR16916860_bin.6_metaWRAP_v1.3_MAG_genomic  | {'K01897'}                                                                       | M00086 |
| GCA_905372835.1_SRR9217428-mag-bin.30_genomic                | {'K01834', 'K00927', 'K01689', 'K01803', 'K00134', 'K00873'}                     | M00002 |
| GCA_905372835.1_SRR9217428-mag-bin.30_genomic                | {'K02108', 'K02115', 'K02110', 'K02113', 'K02109', 'K02112', 'K02111', 'K02114'} | M00157 |
| RDYPD18300059_A_saliva.metaspades.bin.13                     | {'K02108', 'K02109', 'K02112', 'K02111', 'K02115', 'K02110'}                     | M00157 |
| RSZYD18187773_A_saliva.metaspades.bin.68                     | {'K01834', 'K00927', 'K01689', 'K01803', 'K00134', 'K00873'}                     | M00002 |
| RSZYD18187773_A_saliva.metaspades.bin.68                     | {'K02108', 'K02115', 'K02110', 'K02113', 'K02109', 'K02112', 'K02111', 'K02114'} | M00157 |
| GCA_017460625.1                                              | {'K15633', 'K00927', 'K01689', 'K01803', 'K00134', 'K00873'}                     | M00002 |
| GCA_017460625.1                                              | {'K01897'}                                                                       | M00086 |
| RSZYD18078355_A_saliva.metaspades.bin.74                     | {'K01834', 'K00927', 'K01689', 'K01803', 'K00134', 'K00873'}                     | M00002 |
| RSZYD18078355_A_saliva.metaspades.bin.74                     | {'K02108', 'K02115', 'K02110', 'K02113', 'K02109', 'K02112', 'K02111', 'K02114'} | M00157 |
| RDYPD18201709_A_saliva.metaspades.bin.24                     | {'K01689', 'K00927', 'K01803', 'K00134'}                                         | M00002 |
| RDYPD18201709_A_saliva.metaspades.bin.24                     | {'K02108', 'K02115', 'K02110', 'K02113', 'K02109', 'K02112', 'K02111', 'K02114'} | M00157 |
| R0170300124_tooth_RA.megahit.bin.51                          | {'K01834', 'K01689', 'K00873'}                                                   | M00002 |
| R0170300124_tooth_RA.megahit.bin.51                          | {'K02108', 'K02115', 'K02110', 'K02113', 'K02109', 'K02112', 'K02111', 'K02114'} | M00157 |
| GCA_017432105.1                                              | {'K15633', 'K00927', 'K01689', 'K01803', 'K00134', 'K00873'}                     | M00002 |
| GCA_017432105.1                                              | {'K01897'}                                                                       | M00086 |
| GCA_017432105.1                                              | {'K00925', 'K13788'}                                                             | M00579 |
| YS000360_saliva.spades.bin.8                                 | {'K01834', 'K00927', 'K01689', 'K01803', 'K00134', 'K00873'}                     | M00002 |
| YS000360_saliva.spades.bin.8                                 | {'K02108', 'K02115', 'K02110', 'K02113', 'K02109', 'K02112', 'K02111', 'K02114'} | M00157 |
| GCA_022828245.1_ASM2282824v1_genomic                         | {'K01834', 'K00927', 'K01689', 'K01803', 'K00134', 'K00873'}                     | M00002 |
| GCA_022828245.1_ASM2282824v1_genomic                         | {'K02108', 'K02115', 'K02110', 'K02113', 'K02109', 'K02112', 'K02111', 'K02114'} | M00157 |
| GCA_943353165.1_RH-20apr16-349_genomic                       | {'K00927', 'K01803', 'K00134', 'K00873'}                                         | M00002 |
| GCA_943353165.1_RH-20apr16-349_genomic                       | {'K02108', 'K02109', 'K02112', 'K02111', 'K02115', 'K02110', 'K02114'}           | M00157 |
| RSZYD18078736_A_saliva.metaspades.bin.17                     | {'K15633', 'K00927', 'K01689', 'K01803', 'K00134', 'K00873'}                     | M00002 |
| RSZYD18078736_A_saliva.metaspades.bin.17                     | {'K00625', 'K00925'}                                                             | M00579 |
| R0170300306_tooth_RAH.megahit.bin.34                         | {'K01834', 'K00927', 'K01689', 'K01803', 'K00134', 'K00873'}                     | M00002 |
| R0170300306_tooth_RAH.megahit.bin.34                         | {'K02108', 'K02115', 'K02110', 'K02113', 'K02109', 'K02112', 'K02111', 'K02114'} | M00157 |
| GCA_905373795.1_SRR9217490-mag-bin.5_genomic                 | {'K01834', 'K00927', 'K01689', 'K01803', 'K00134', 'K00873'}                     | M00002 |
| GCA_905373795.1_SRR9217490-mag-bin.5_genomic                 | {'K02108', 'K02109', 'K02112', 'K02111', 'K02115', 'K02110', 'K02114'}           | M00157 |
| R0170300309_tooth_RAH.megahit.bin.15                         | {'K01834', 'K00927', 'K01689', 'K01803', 'K00134', 'K00873'}                     | M00002 |
| SZAXPI018288-133_RA_dental.metaspades.bin.72                 | {'K01834', 'K01689', 'K01803', 'K00134', 'K00873'}                               | M00002 |
| SZAXPI018288-133_RA_dental.metaspades.bin.72                 | {'K02108', 'K02115', 'K02110', 'K02113', 'K02109', 'K02112', 'K02111', 'K02114'} | M00157 |
| GCA_017404325.1                                              | {'K15633', 'K00927', 'K01689', 'K01803', 'K00134', 'K00873'}                     | M00002 |
| GCA_017404325.1                                              | {'K01897'}                                                                       | M00086 |
| GCA_017404325.1                                              | {'K00925', 'K13788'}                                                             | M00579 |
| R0170300282_tooth_RAH.megahit.bin.15                         | {'K01834', 'K00927', 'K01689', 'K01803', 'K00134', 'K00873'}                     | M00002 |
| RSZAXPI002673-20_RA_dental.metaspades.bin.25                 | {'K01834', 'K00927', 'K01689', 'K01803', 'K00134', 'K00873'}                     | M00002 |
| RSZAXPI002673-20_RA_dental.metaspades.bin.25                 | {'K02108', 'K02115', 'K02110', 'K02113', 'K02109', 'K02112', 'K02111', 'K02114'} | M00157 |
| RSZYD18187907_A_saliva.metaspades.bin.32                     | {'K01834', 'K00927', 'K01689', 'K01803', 'K00134', 'K00873'}                     | M00002 |
| RSZYD18187907_A_saliva.metaspades.bin.32                     | {'K02108', 'K02115', 'K02110', 'K02113', 'K02109', 'K02112', 'K02111', 'K02114'} | M00157 |
| GCA_013333415.2_ASM1333341v2_genomic                         | {'K15633', 'K00927', 'K01689', 'K01803', 'K00134', 'K00873'}                     | M00002 |
| GCA_013333415.2_ASM1333341v2_genomic                         | {'K00625', 'K00925'}                                                             | M00579 |
| R0170300193_tooth_RA.megahit.bin.67                          | {'K15633', 'K00927', 'K01689', 'K01803', 'K00134', 'K00873'}                     | M00002 |
| R0170300193_tooth_RA.megahit.bin.67                          | {'K02108', 'K02115', 'K02110', 'K02113', 'K02109', 'K02112', 'K02111', 'K02114'} | M00157 |
| SZAXPI018176-32_RA_dental.metaspades.bin.12                  | {'K01834', 'K01689', 'K01803', 'K00134', 'K00873'}                               | M00002 |
| SZAXPI018176-32_RA_dental.metaspades.bin.12                  | {'K02108', 'K02115', 'K02110', 'K02113', 'K02109', 'K02112', 'K02111', 'K02114'} | M00157 |
| GCA_022828325.1_ASM2282832v1_genomic                         | {'K01834', 'K00927', 'K01689', 'K01803', 'K00134', 'K00873'}                     | M00002 |
| GCA_022828325.1_ASM2282832v1_genomic                         | {'K02108', 'K02115', 'K02110', 'K02113', 'K02109', 'K02112', 'K02111', 'K02114'} | M00157 |
| RSZYD18078473_A_saliva.metaspades.bin.18                     | {'K01834', 'K00927', 'K01689', 'K01803', 'K00134', 'K00873'}                     | M00002 |
| RSZYD18078473_A_saliva.metaspades.bin.18                     | {'K02108', 'K02115', 'K02110', 'K02113', 'K02109', 'K02112', 'K02111', 'K02114'} | M00157 |
| GCA_017524405.1_ASM1752440v1_genomic                         | {'K00927', 'K01689', 'K01803', 'K00134', 'K00873'}                               | M00002 |
| GCA_017524405.1_ASM1752440v1_genomic                         | {'K00625', 'K00925'}                                                             | M00579 |
| RSZAXPI002312-21_RAH_dental.metaspades.bin.14                | {'K01834', 'K00927', 'K01689', 'K01803', 'K00134', 'K00873'}                     | M00002 |
| GCA_905373275.1_SRR9217462-mag-bin.7_genomic                 | {'K01834', 'K00927', 'K01689', 'K01803', 'K00134', 'K00873'}                     | M00002 |
| RDYPD18201598_A_saliva.metaspades.bin.37                     | {'K01834', 'K00927', 'K01689', 'K01803', 'K00134', 'K00873'}                     | M00002 |
| RDYPD18201598_A_saliva.metaspades.bin.37                     | {'K02108', 'K02115', 'K02110', 'K02113', 'K02109', 'K02112', 'K02111', 'K02114'} | M00157 |
| RDYPD18201698_A_saliva.metaspades.bin.50                     | {'K01834', 'K00927', 'K01689', 'K01803', 'K00134', 'K00873'}                     | M00002 |
| RSZYD18187400_A_saliva.metaspades.bin.89                     | {'K01834', 'K01689', 'K01803', 'K00134', 'K00873'}                               | M00002 |
| RSZYD18187400_A_saliva.metaspades.bin.89                     | {'K02108', 'K02115', 'K02110', 'K02113', 'K02109', 'K02112', 'K02111', 'K02114'} | M00157 |
| RSZYD18187184_A_saliva.metaspades.bin.10                     | {'K01834', 'K00927', 'K01689', 'K01803', 'K00134', 'K00873'}                     | M00002 |
| RSZYD18187184_A_saliva.metaspades.bin.10                     | {'K02108', 'K02115', 'K02110', 'K02113', 'K02109', 'K02112', 'K02111', 'K02114'} | M00157 |
| R0170300078_tooth_RA.megahit.bin.66                          | {'K01834', 'K00927', 'K01689', 'K01803', 'K00134', 'K00873'}                     | M00002 |
| GCA_016219345.1_ASM1621934v1_genomic                         | {'K00927', 'K01803', 'K00134', 'K00873'}                                         | M00002 |
| GCA_016219345.1_ASM1621934v1_genomic                         | {'K02108', 'K02109', 'K02112', 'K02111', 'K02115', 'K02110', 'K02114'}           | M00157 |
| GCA_016219345.1_ASM1621934v1_genomic                         | {'K02298', 'K02300', 'K02297', 'K02299'}                                         | M00417 |
| RSZAXPI002653-13_RA_saliva.metaspades.bin.70                 | {'K01834', 'K00927', 'K01689', 'K01803', 'K00134', 'K00873'}                     | M00002 |
| RSZAXPI002653-13_RA_saliva.metaspades.bin.70                 | {'K02108', 'K02115', 'K02110', 'K02113', 'K02109', 'K02112', 'K02111', 'K02114'} | M00157 |
| R0170300133_tooth_RA.megahit.bin.23                          | {'K01834', 'K00927', 'K01689', 'K01803', 'K00134', 'K00873'}                     | M00002 |
| R0170300133_tooth_RA.megahit.bin.23                          | {'K02108', 'K02115', 'K02110', 'K02113', 'K02109', 'K02112', 'K02111', 'K02114'} | M00157 |
| RSZYD18187612_A_saliva.metaspades.bin.12                     | {'K01834', 'K00927', 'K01689', 'K01803', 'K00134', 'K00873'}                     | M00002 |
| RSZYD18187612_A_saliva.metaspades.bin.12                     | {'K02108', 'K02115', 'K02110', 'K02113', 'K02109', 'K02112', 'K02111', 'K02114'} | M00157 |
| GCA_009776375.1_ASM977637v1_genomic                          | {'K15633', 'K00927', 'K01689', 'K01803', 'K00134', 'K00873'}                     | M00002 |
| GCA_009776375.1_ASM977637v1_genomic                          | {'K01897'}                                                                       | M00086 |
| GCA_009776375.1_ASM977637v1_genomic                          | {'K02108', 'K02109', 'K02112', 'K02111', 'K02115', 'K02110', 'K02114'}           | M00157 |
| GCA_009776375.1_ASM977637v1_genomic                          | {'K00925', 'K00625', 'K13788'}                                                   | M00579 |
| GCA_947059195.1_ERR9465699_bin.49_metawrap_v1.3_MAG_genomic  | {'K15633', 'K00927', 'K01689', 'K01803', 'K00134', 'K00873'}                     | M00002 |
| GCA_947059195.1_ERR9465699_bin.49_metawrap_v1.3_MAG_genomic  | {'K00625', 'K00925'}                                                             | M00579 |
| RSZAXPI002318-27_RAH_dental.metaspades.bin.48                | {'K01834', 'K01689', 'K01803', 'K00134', 'K00873'}                               | M00002 |
| RSZAXPI002318-27_RAH_dental.metaspades.bin.48                | {'K02108', 'K02115', 'K02110', 'K02113', 'K02109', 'K02112', 'K02111', 'K02114'} | M00157 |
| YS000932_saliva.spades.bin.7                                 | {'K01834', 'K00927', 'K01689', 'K01803', 'K00134', 'K00873'}                     | M00002 |
| RDYPD18097572_A_saliva.metaspades.bin.15                     | {'K01834', 'K00927', 'K01689', 'K01803', 'K00134', 'K00873'}                     | M00002 |
| GCA_905372385.1_SRR9217408-mag-bin.1_genomic                 | {'K01834', 'K01689', 'K01803', 'K00134', 'K00873'}                               | M00002 |
| GCA_905372385.1_SRR9217408-mag-bin.1_genomic                 | {'K02108', 'K02115', 'K02110', 'K02113', 'K02109', 'K02112', 'K02111', 'K02114'} | M00157 |
| GCA_946561855.1_SRR19792994_bin.70_metawrap_v1.3_MAG_genomic | {'K15633', 'K00927', 'K01689', 'K01803', 'K00134', 'K00873'}                     | M00002 |
| R0170300326_tooth_RA.megahit.bin.12                          | {'K01834', 'K00927', 'K01689', 'K01803', 'K00134', 'K00873'}                     | M00002 |
| RSZAXPI002326-41_RAH_dental.metaspades.bin.8                 | {'K15633', 'K00927', 'K01689', 'K01803', 'K00134', 'K00873'}                     | M00002 |
| RSZAXPI002326-41_RAH_dental.metaspades.bin.8                 | {'K00925', 'K00625', 'K13788'}                                                   | M00579 |
| GCA_002404195.1_ASM240419v1_genomic                          | {'K01834', 'K00927', 'K15634', 'K01689', 'K01803', 'K00134', 'K00873'}           | M00002 |
| GCA_002404195.1_ASM240419v1_genomic                          | {'K02108', 'K02115', 'K02110', 'K02113', 'K02109', 'K02112', 'K02111', 'K02114'} | M00157 |
| GCA_002404195.1_ASM240419v1_genomic                          | {'K02298', 'K02300', 'K02297', 'K02299'}                                         | M00417 |
| RDYPD18097660_A_saliva.metaspades.bin.29                     | {'K01834', 'K00927', 'K01689', 'K01803', 'K00134', 'K00873'}                     | M00002 |
| RDYPD18097660_A_saliva.metaspades.bin.29                     | {'K02108', 'K02115', 'K02110', 'K02113', 'K02109', 'K02112', 'K02111', 'K02114'} | M00157 |
| R0170300162_tooth_RA.megahit.bin.4                           | {'K01834', 'K00927', 'K01689', 'K01803', 'K00134', 'K00873'}                     | M00002 |
| R0170300267_tooth_RAH.megahit.bin.64                         | {'K01834', 'K01689', 'K01803', 'K00134', 'K00873'}                               | M00002 |
| R0170300267_tooth_RAH.megahit.bin.64                         | {'K02108', 'K02115', 'K02110', 'K02113', 'K02109', 'K02112', 'K02111', 'K02114'} | M00157 |
| GCA_027449065.1_ASM2744906v1_genomic                         | {'K00927', 'K15634', 'K01803', 'K00134', 'K00873'}                               | M00002 |
| GCA_027449065.1_ASM2744906v1_genomic                         | {'K02108', 'K02115', 'K02110', 'K02113', 'K02109', 'K02112', 'K02111', 'K02114'} | M00157 |
| GCA_027449065.1_ASM2744906v1_genomic                         | {'K02298', 'K02300', 'K02297', 'K02299'}                                         | M00417 |
| GCA_017459705.1                                              | {'K15633', 'K00927', 'K01689', 'K01803', 'K00134', 'K00873'}                     | M00002 |
| GCA_017459705.1                                              | {'K01897'}                                                                       | M00086 |
| GCA_017459705.1                                              | {'K00625', 'K00925'}                                                             | M00579 |
| SZAXPI018094-15_RA_dental.metaspades.bin.29                  | {'K01834', 'K00927', 'K01689', 'K01803', 'K00134', 'K00873'}                     | M00002 |
| RSZYD18187311_A_saliva.metaspades.bin.30                     | {'K01834', 'K00927', 'K01689', 'K01803', 'K00134', 'K00873'}                     | M00002 |
| YS000487_saliva.spades.bin.36                                | {'K01834', 'K00927', 'K01689', 'K01803', 'K00134', 'K00873'}                     | M00002 |



|                                                                  |                                                                                  |        |
|------------------------------------------------------------------|----------------------------------------------------------------------------------|--------|
| YS000487 saliva.spades.bin.36                                    | {'K02108', 'K02115', 'K02110', 'K02113', 'K02109', 'K02112', 'K02111', 'K02114'} | M00157 |
| RSZYD18078725 A saliva.metaspades.bin.23                         | {'K01834', 'K00927', 'K01689', 'K01803', 'K00134', 'K00873'}                     | M00002 |
| RSZYD18078725 A saliva.metaspades.bin.23                         | {'K02108', 'K02115', 'K02110', 'K02113', 'K02109', 'K02112', 'K02111', 'K02114'} | M00157 |
| RSZYD18187626 A saliva.metaspades.bin.21                         | {'K01834', 'K00927', 'K01689', 'K01803', 'K00134', 'K00873'}                     | M00002 |
| RSZYD18187626 A saliva.metaspades.bin.21                         | {'K02108', 'K02115', 'K02110', 'K02113', 'K02109', 'K02112', 'K02111', 'K02114'} | M00157 |
| GCA_015257785.3 ASM1525778v3_genomic                             | {'K01834', 'K00927', 'K01689', 'K01803', 'K00134', 'K00873'}                     | M00002 |
| SZAXPI018190-56 RA_dental.metaspades.bin.33                      | {'K00927', 'K01689', 'K01803', 'K00134', 'K00873'}                               | M00002 |
| R0170300152 tooth_RA.megahit.bin.61                              | {'K02108', 'K02115', 'K02110', 'K02113', 'K02109', 'K02112', 'K02111', 'K02114'} | M00157 |
| R0170300152 tooth_RA.megahit.bin.61                              | {'K15633', 'K00927', 'K01689', 'K01803', 'K00134', 'K00873'}                     | M00002 |
| SZAXPI018317-19 RA_dental.metaspades.bin.46                      | {'K00625', 'K00925'}                                                             | M00579 |
| SZAXPI018317-19 RA_dental.metaspades.bin.46                      | {'K01834', 'K01689', 'K01803', 'K00134', 'K00873'}                               | M00002 |
| YS000166 saliva.spades.bin.9                                     | {'K02108', 'K02115', 'K02110', 'K02113', 'K02109', 'K02112', 'K02111', 'K02114'} | M00157 |
| YS000166 saliva.spades.bin.9                                     | {'K01834', 'K00927', 'K01689', 'K01803', 'K00134', 'K00873'}                     | M00002 |
| RSZYD18078809 A saliva.metaspades.bin.65                         | {'K02108', 'K02115', 'K02110', 'K02113', 'K02109', 'K02112', 'K02111', 'K02114'} | M00157 |
| RSZYD18078809 A saliva.metaspades.bin.65                         | {'K01834', 'K00927', 'K01689', 'K01803', 'K00134', 'K00873'}                     | M00002 |
| SZAXPI011699-166 RA_dental.metaspades.bin.36                     | {'K02108', 'K02115', 'K02110', 'K02113', 'K02109', 'K02112', 'K02111', 'K02114'} | M00157 |
| SZAXPI011699-166 RA_dental.metaspades.bin.36                     | {'K01834', 'K00927', 'K01689', 'K01803', 'K00134', 'K00873'}                     | M00002 |
| R0170300252 tooth_RAH.megahit.bin.32                             | {'K02108', 'K02109', 'K02112', 'K02111', 'K02115', 'K02110', 'K02114'}           | M00157 |
| GCA_947388885.1 SRR15214585_bin.22_metawrap_v1.3_MAG_genomic     | {'K01834', 'K00927', 'K01689', 'K01803', 'K00134', 'K00873'}                     | M00002 |
| RSZAXPI002675-22 RA_dental.metaspades.bin.61                     | {'K01834', 'K01689', 'K00873'}                                                   | M00002 |
| RSZAXPI002675-22 RA_dental.metaspades.bin.61                     | {'K02108', 'K02115', 'K02110', 'K02113', 'K02109', 'K02112', 'K02111', 'K02114'} | M00157 |
| GCA_025924835.1 ASM2592483v1_genomic                             | {'K00927', 'K01803', 'K00134', 'K00873'}                                         | M00002 |
| GCA_025924835.1 ASM2592483v1_genomic                             | {'K02108', 'K02109', 'K02112', 'K02111', 'K02115', 'K02110', 'K02114'}           | M00157 |
| GCA_025924835.1 ASM2592483v1_genomic                             | {'K02298', 'K02297', 'K02299'}                                                   | M00417 |
| RSZYD18187707 A saliva.metaspades.bin.80                         | {'K15633', 'K00927', 'K01689', 'K01803', 'K00134', 'K00873'}                     | M00002 |
| RSZYD18187707 A saliva.metaspades.bin.80                         | {'K00625', 'K00925'}                                                             | M00579 |
| GCA_013100805.1 ASM1310080v1_genomic                             | {'K01834', 'K00927', 'K01689', 'K01803', 'K00134', 'K00873'}                     | M00002 |
| GCA_013100805.1 ASM1310080v1_genomic                             | {'K02108', 'K02109', 'K02112', 'K02111', 'K02115', 'K02110', 'K02114'}           | M00157 |
| R0170300204 tooth_RA.megahit.bin.65                              | {'K01834', 'K01689', 'K01803', 'K00134', 'K00873'}                               | M00002 |
| R0170300204 tooth_RA.megahit.bin.65                              | {'K02108', 'K02115', 'K02110', 'K02113', 'K02109', 'K02112', 'K02111', 'K02114'} | M00157 |
| GCA_013333135.2 ASM1333313v2_genomic                             | {'K15633', 'K00927', 'K01689', 'K01803', 'K00134', 'K00873'}                     | M00002 |
| GCA_013333135.2 ASM1333313v2_genomic                             | {'K00625', 'K00925'}                                                             | M00579 |
| GCA_947385605.1 ERR6760111_bin.57_metawrap_v1.3_MAG_genomic      | {'K00927', 'K01689', 'K01803', 'K00134', 'K00873'}                               | M00002 |
| GCA_947385605.1 ERR6760111_bin.57_metawrap_v1.3_MAG_genomic      | {'K00625', 'K00925'}                                                             | M00579 |
| R0170300323 tooth_RAH.megahit.bin.52                             | {'K01834', 'K00927', 'K01689', 'K01803', 'K00134', 'K00873'}                     | M00002 |
| R0170300323 tooth_RAH.megahit.bin.52                             | {'K02108', 'K02109', 'K02111', 'K02115', 'K02110', 'K02113'}                     | M00157 |
| RDPYD18098936 A saliva.metaspades.bin.10                         | {'K01834', 'K00927', 'K01689', 'K01803', 'K00134', 'K00873'}                     | M00002 |
| GCA_005697215.1 ASM569721v1_genomic                              | {'K01834', 'K00927', 'K01689', 'K01803', 'K00134', 'K00873'}                     | M00002 |
| GCA_005697215.1 ASM569721v1_genomic                              | {'K02108', 'K02115', 'K02110', 'K02113', 'K02109', 'K02112', 'K02111', 'K02114'} | M00157 |
| GCA_015257815.1 ASM1525781v1_genomic                             | {'K01834', 'K00927', 'K01689', 'K01803', 'K00134', 'K00873'}                     | M00002 |
| RSZAXPI002627-75 RA_dental.metaspades.bin.25                     | {'K01834', 'K00927', 'K01689', 'K01803', 'K00134', 'K00873'}                     | M00002 |
| GCA_016191105.1 ASM1619110v1_genomic                             | {'K00927', 'K01689', 'K01803', 'K00134', 'K00873'}                               | M00002 |
| GCA_016191105.1 ASM1619110v1_genomic                             | {'K02112', 'K02111', 'K02115', 'K02114'}                                         | M00157 |
| RSZYD18187438 A saliva.metaspades.bin.51                         | {'K01834', 'K00927', 'K01689', 'K01803', 'K00134'}                               | M00002 |
| RSZYD18078399 A saliva.metaspades.bin.40                         | {'K01834', 'K00927', 'K01689', 'K01803', 'K00134', 'K00873'}                     | M00002 |
| RSZYD18078399 A saliva.metaspades.bin.40                         | {'K02108', 'K02115', 'K02110', 'K02113', 'K02109', 'K02112', 'K02111', 'K02114'} | M00157 |
| R0170300195 tooth_RA.megahit.bin.89                              | {'K00927', 'K01689', 'K01803', 'K00134', 'K00873'}                               | M00002 |
| R0170300195 tooth_RA.megahit.bin.89                              | {'K02108', 'K02115', 'K02110', 'K02113', 'K02109', 'K02112', 'K02111', 'K02114'} | M00157 |
| GCA_027428095.1 ASM2742809v1_genomic                             | {'K01834', 'K00927', 'K01689', 'K01803', 'K00873'}                               | M00002 |
| GCA_027428095.1 ASM2742809v1_genomic                             | {'K02108', 'K02112', 'K02111', 'K02115', 'K02110', 'K02113', 'K02114'}           | M00157 |
| R0170300118 tooth_RA.megahit.bin.3                               | {'K00927', 'K01689', 'K01803', 'K00134', 'K00873'}                               | M00002 |
| R0170300118 tooth_RA.megahit.bin.3                               | {'K02108', 'K02115', 'K02110', 'K02113', 'K02109', 'K02112', 'K02111', 'K02114'} | M00157 |
| GCA_024635495.1 ASM2463549v1_genomic                             | {'K00927', 'K15634', 'K01689', 'K01803', 'K00134', 'K00873'}                     | M00002 |
| GCA_024635495.1 ASM2463549v1_genomic                             | {'K02108', 'K02115', 'K02110', 'K02113', 'K02109', 'K02112', 'K02111', 'K02114'} | M00157 |
| GCA_024635495.1 ASM2463549v1_genomic                             | {'K02298', 'K02300', 'K02297', 'K02299'}                                         | M00417 |
| RSZAXPI002673-20 RA_dental.metaspades.bin.43                     | {'K01834', 'K01689', 'K01803', 'K00134', 'K00873'}                               | M00002 |
| RSZAXPI002673-20 RA_dental.metaspades.bin.43                     | {'K02108', 'K02115', 'K02110', 'K02113', 'K02109', 'K02112', 'K02111', 'K02114'} | M00157 |
| RSZYD18187447 A saliva.metaspades.bin.38                         | {'K01834', 'K00927', 'K01689', 'K01803', 'K00134', 'K00873'}                     | M00002 |
| GCA_013100825.1 ASM1310082v1_genomic                             | {'K01834', 'K00927', 'K01689', 'K01803', 'K00134', 'K00873'}                     | M00002 |
| GCA_013100825.1 ASM1310082v1_genomic                             | {'K02108', 'K02109', 'K02112', 'K02111', 'K02115', 'K02110', 'K02114'}           | M00157 |
| GCA_027426995.1 ASM2742699v1_genomic                             | {'K00927', 'K01803', 'K00134', 'K00873'}                                         | M00002 |
| GCA_027426995.1 ASM2742699v1_genomic                             | {'K02108', 'K02109', 'K02112', 'K02111', 'K02115', 'K02110', 'K02114'}           | M00157 |
| GCA_027426995.1 ASM2742699v1_genomic                             | {'K02298', 'K02300', 'K02297', 'K02299'}                                         | M00417 |
| RSZAXPI002309-18 RAH_dental.metaspades.bin.28                    | {'K00927', 'K01689', 'K01803', 'K00134', 'K00873'}                               | M00002 |
| RSZAXPI002309-18 RAH_dental.metaspades.bin.28                    | {'K02108', 'K02115', 'K02110', 'K02113', 'K02109', 'K02112', 'K02111', 'K02114'} | M00157 |
| R0170300219 tooth_RA.megahit.bin.19                              | {'K01834', 'K01689', 'K01803', 'K00134', 'K00873'}                               | M00002 |
| R0170300219 tooth_RA.megahit.bin.19                              | {'K02108', 'K02115', 'K02110', 'K02113', 'K02109', 'K02112', 'K02111', 'K02114'} | M00157 |
| RSZYD18078343 A saliva.metaspades.bin.21                         | {'K01834', 'K00927', 'K01689', 'K01803', 'K00134', 'K00873'}                     | M00002 |
| RSZYD18078343 A saliva.metaspades.bin.21                         | {'K02108', 'K02115', 'K02110', 'K02113', 'K02109', 'K02112', 'K02111', 'K02114'} | M00157 |
| RSZYD18078466 A saliva.metaspades.bin.3                          | {'K01834', 'K00927', 'K01689', 'K01803', 'K00134', 'K00873'}                     | M00002 |
| RSZYD18078466 A saliva.metaspades.bin.3                          | {'K02108', 'K02115', 'K02110', 'K02113', 'K02109', 'K02112', 'K02111', 'K02114'} | M00157 |
| RDPYD18201627 A saliva.metaspades.bin.4                          | {'K01689', 'K00927', 'K01803', 'K00134'}                                         | M00002 |
| RDPYD18201627 A saliva.metaspades.bin.4                          | {'K02108', 'K02109', 'K02110', 'K02113'}                                         | M00157 |
| RSZYD18078660 A saliva.metaspades.bin.67                         | {'K01834', 'K00927', 'K01689', 'K01803', 'K00134', 'K00873'}                     | M00002 |
| RSZYD18078660 A saliva.metaspades.bin.67                         | {'K02108', 'K02115', 'K02110', 'K02113', 'K02109', 'K02112', 'K02111', 'K02114'} | M00157 |
| RSZAXPI002609-25 RA_dental.metaspades.bin.46                     | {'K00927', 'K01689', 'K01803', 'K00134', 'K00873'}                               | M00002 |
| RSZAXPI002609-25 RA_dental.metaspades.bin.46                     | {'K02108', 'K02115', 'K02110', 'K02113', 'K02109', 'K02112', 'K02111', 'K02114'} | M00157 |
| R0170300327 tooth_RA.megahit.bin.68                              | {'K00927', 'K01689', 'K01803', 'K00134', 'K00873'}                               | M00002 |
| R0170300327 tooth_RA.megahit.bin.68                              | {'K02108', 'K02115', 'K02110', 'K02113', 'K02109', 'K02112', 'K02111', 'K02114'} | M00157 |
| R0170300141 tooth_RA.megahit.bin.72                              | {'K01834', 'K00927', 'K01689', 'K01803', 'K00134', 'K00873'}                     | M00002 |
| R0170300144 tooth_RA.megahit.bin.121                             | {'K00927', 'K01689', 'K01803', 'K00134', 'K00873'}                               | M00002 |
| R0170300144 tooth_RA.megahit.bin.121                             | {'K02108', 'K02115', 'K02110', 'K02113', 'K02109', 'K02112', 'K02111', 'K02114'} | M00157 |
| SZAXPI018172-26 RA_dental.metaspades.bin.32                      | {'K01834', 'K01689', 'K00873'}                                                   | M00002 |
| SZAXPI018172-26 RA_dental.metaspades.bin.32                      | {'K02108', 'K02115', 'K02110', 'K02113', 'K02109', 'K02112', 'K02111', 'K02114'} | M00157 |
| RSZAXPI002331-56 RAH_dental.metaspades.bin.18                    | {'K01834', 'K00927', 'K01689', 'K01803', 'K00134', 'K00873'}                     | M00002 |
| GCA_903894915.1 freshwater_MAG_--- AlinenLipids_bin-5330_genomic | {'K00927', 'K01803', 'K00134', 'K00873'}                                         | M00002 |
| GCA_903894915.1 freshwater_MAG_--- AlinenLipids_bin-5330_genomic | {'K02108', 'K02109', 'K02112', 'K02111', 'K02115', 'K02110', 'K02114'}           | M00157 |
| GCA_903894915.1 freshwater_MAG_--- AlinenLipids_bin-5330_genomic | {'K02298', 'K02300', 'K02297', 'K02299'}                                         | M00417 |
| RSZYD18187299 A saliva.metaspades.bin.6                          | {'K01834', 'K00927', 'K01689', 'K01803', 'K00134', 'K00873'}                     | M00002 |
| RSZYD18187299 A saliva.metaspades.bin.6                          | {'K02108', 'K02115', 'K02110', 'K02113', 'K02109', 'K02112', 'K02111', 'K02114'} | M00157 |
| GCA_017431745.1                                                  | {'K15633', 'K00927', 'K01689', 'K01803', 'K00134', 'K00873'}                     | M00002 |
| GCA_017431745.1                                                  | {'K01897'}                                                                       | M00086 |
| R0170300301 tooth_RAH.megahit.bin.77                             | {'K00927', 'K01689', 'K01803', 'K00134', 'K00873'}                               | M00002 |
| R0170300301 tooth_RAH.megahit.bin.77                             | {'K02108', 'K02115', 'K02110', 'K02113', 'K02109', 'K02112', 'K02111', 'K02114'} | M00157 |
| R0170300258 tooth_RAH.megahit.bin.41                             | {'K01834', 'K15634', 'K01689', 'K00873'}                                         | M00002 |
| R0170300258 tooth_RAH.megahit.bin.41                             | {'K02108', 'K02115', 'K02110', 'K02113', 'K02109', 'K02112', 'K02111', 'K02114'} | M00157 |
| GCA_027331975.1 ASM2733197v1_genomic                             | {'K00927', 'K01803', 'K00134', 'K00873'}                                         | M00002 |
| GCA_027331975.1 ASM2733197v1_genomic                             | {'K02108', 'K02109', 'K02112', 'K02111', 'K02115', 'K02110', 'K02114'}           | M00157 |
| GCA_027331975.1 ASM2733197v1_genomic                             | {'K02298', 'K02300', 'K02297', 'K02299'}                                         | M00417 |
| YS000381 saliva.spades.bin.25                                    | {'K01834', 'K00927', 'K01689', 'K01803', 'K00873'}                               | M00002 |
| YS000381 saliva.spades.bin.25                                    | {'K02108', 'K02115', 'K02110', 'K02113', 'K02109', 'K02112', 'K02111', 'K02114'} | M00157 |
| GCA_947426085.1 SRR18439536_bin.4_metawrap_v1.3_MAG_genomic      | {'K15633', 'K00927', 'K01689', 'K01803', 'K00134', 'K00873'}                     | M00002 |
| GCA_016000075.1 ASM1600007v1_genomic                             | {'K00927', 'K01803', 'K00134', 'K00873'}                                         | M00002 |
| GCA_016000075.1 ASM1600007v1_genomic                             | {'K02108', 'K02115', 'K02110', 'K02113', 'K02109', 'K02112', 'K02111', 'K02114'} | M00157 |

|                                                              |                                                                           |        |
|--------------------------------------------------------------|---------------------------------------------------------------------------|--------|
| GCA_027427775.1_ASM2742777v1_genomic                         | {'K00927','K01803','K00134','K00873'}                                     | M00002 |
| GCA_027427775.1_ASM2742777v1_genomic                         | {'K02108','K02115','K02110','K02113','K02109','K02112','K02111','K02114'} | M00157 |
| GCA_027427775.1_ASM2742777v1_genomic                         | {'K02298','K02300','K02297','K02299'}                                     | M00417 |
| RDPYD18097506_A_saliva.metaspades.bin.46                     | {'K01834','K00927','K01689','K01803','K00134','K00873'}                   | M00002 |
| RDPYD18300324_A_saliva.metaspades.bin.14                     | {'K01834','K00927','K01689','K01803','K00134','K00873'}                   | M00002 |
| RDPYD18300324_A_saliva.metaspades.bin.14                     | {'K02108','K02115','K02110','K02113','K02109','K02112','K02111','K02114'} | M00157 |
| GCA_025451045.1_ASM2545104v1_genomic                         | {'K00927','K01803','K00134','K00873'}                                     | M00002 |
| GCA_025451045.1_ASM2545104v1_genomic                         | {'K02108','K02109','K02112','K02111','K02115','K02110','K02114'}          | M00157 |
| GCA_025451045.1_ASM2545104v1_genomic                         | {'K02298','K02300','K02297','K02299'}                                     | M00417 |
| R0170300318_tooth_RAH.megahit.bin.131                        | {'K00927','K01689','K01803','K00134','K00873'}                            | M00002 |
| R0170300318_tooth_RAH.megahit.bin.131                        | {'K02108','K02115','K02110','K02113','K02109','K02112','K02111','K02114'} | M00157 |
| GCA_002434055.1_ASM243405v1_genomic                          | {'K00927','K01803','K00134','K00873'}                                     | M00002 |
| GCA_002434055.1_ASM243405v1_genomic                          | {'K02108','K02109','K02112','K02111','K02115','K02110','K02114'}          | M00157 |
| GCA_002434055.1_ASM243405v1_genomic                          | {'K02298','K02300','K02297','K02299'}                                     | M00417 |
| GCA_902461855.1_UHGG-TPA_MGYG-HGUT-00376_genomic             | {'K01834','K00927','K01803','K00134','K00873'}                            | M00002 |
| RDPYD18300091_A_saliva.metaspades.bin.68                     | {'K15633','K00927','K01689','K01803','K00134','K00873'}                   | M00002 |
| RDPYD18300091_A_saliva.metaspades.bin.68                     | {'K00625','K00925'}                                                       | M00579 |
| RSZYD18187358_A_saliva.metaspades.bin.22                     | {'K01834','K00927','K01689','K01803','K00134','K00873'}                   | M00002 |
| RSZYD18187358_A_saliva.metaspades.bin.22                     | {'K02108','K02115','K02110','K02113','K02109','K02112','K02111','K02114'} | M00157 |
| SZAXPI018493-25_RA_saliva.metaspades.bin.44                  | {'K15633','K00927','K01689','K01803','K00134','K00873'}                   | M00002 |
| SZAXPI018493-25_RA_saliva.metaspades.bin.44                  | {'K00625','K00925'}                                                       | M00579 |
| SZAXPI018271-62_RA_dental.metaspades.bin.3                   | {'K01834','K00927','K01689','K01803','K00134','K00873'}                   | M00002 |
| SZAXPI018271-62_RA_dental.metaspades.bin.3                   | {'K02108','K02115','K02110','K02113','K02109','K02112','K02111','K02114'} | M00157 |
| R0170300268_tooth_RAH.megahit.bin.104                        | {'K00927','K01689','K01803','K00134','K00873'}                            | M00002 |
| R0170300268_tooth_RAH.megahit.bin.104                        | {'K02108','K02115','K02110','K02113','K02109','K02112','K02111','K02114'} | M00157 |
| SZAXPI018275-88_RA_dental.metaspades.bin.50                  | {'K15633','K00927','K01689','K01803','K00134','K00873'}                   | M00002 |
| SZAXPI018275-88_RA_dental.metaspades.bin.50                  | {'K02108','K02115','K02110','K02113','K02109','K02112','K02111','K02114'} | M00157 |
| RDPYD18088979_A_saliva.metaspades.bin.8                      | {'K15633','K00927','K01689','K01803','K00134','K00873'}                   | M00002 |
| RDPYD18088979_A_saliva.metaspades.bin.8                      | {'K00625','K00925'}                                                       | M00579 |
| RSZYD18187790_A_saliva.metaspades.bin.2                      | {'K15633','K00927','K01689','K01803','K00134','K00873'}                   | M00002 |
| RSZYD18187790_A_saliva.metaspades.bin.2                      | {'K00625','K00925'}                                                       | M00579 |
| GCA_002313515.1_ASM231351v1_genomic                          | {'K01834','K00927','K15634','K01689','K01803','K00134','K00873'}          | M00002 |
| GCA_002313515.1_ASM231351v1_genomic                          | {'K01897'}                                                                | M00086 |
| GCA_013098655.1_ASM1309865v1_genomic                         | {'K01834','K00927','K01689','K01803','K00134','K00873'}                   | M00002 |
| GCA_013098655.1_ASM1309865v1_genomic                         | {'K02108','K02115','K02110','K02113','K02109','K02112','K02111','K02114'} | M00157 |
| RDPYD18098496_A_saliva.metaspades.bin.7                      | {'K01834','K00927','K01689','K01803','K00134','K00873'}                   | M00002 |
| GCA_947384105.1_ERR6760075_bin.53_metawrap_v1.3_MAG_genomic  | {'K15633','K00927','K01689','K01803','K00134','K00873'}                   | M00002 |
| R0170300207_tooth_RAH.megahit.bin.65                         | {'K01834','K00927','K01689','K01803','K00134','K00873'}                   | M00002 |
| GCA_946222005.1_ZZEVbxAAO_bin.25_MAG_genomic                 | {'K01834','K01689','K00873'}                                              | M00002 |
| GCA_946222005.1_ZZEVbxAAO_bin.25_MAG_genomic                 | {'K02108','K02115','K02110','K02113','K02109','K02112','K02111','K02114'} | M00157 |
| RSZYD18078582_A_saliva.metaspades.bin.58                     | {'K15633','K00927','K01689','K01803','K00134','K00873'}                   | M00002 |
| RSZYD18078582_A_saliva.metaspades.bin.58                     | {'K00625','K00925'}                                                       | M00579 |
| RDPYD18189830_A_saliva.metaspades.bin.63                     | {'K01834','K00927','K01689','K01803','K00134','K00873'}                   | M00002 |
| RDPYD18189830_A_saliva.metaspades.bin.63                     | {'K02112','K02114'}                                                       | M00157 |
| RDPYD18099004_A_saliva.metaspades.bin.53                     | {'K01834','K00927','K01689','K01803','K00134','K00873'}                   | M00002 |
| RDPYD18099004_A_saliva.metaspades.bin.53                     | {'K02108','K02115','K02110','K02113','K02109','K02112','K02111','K02114'} | M00157 |
| YS000545_saliva.spades.bin.26                                | {'K01834','K00927','K01689','K01803','K00134','K00873'}                   | M00002 |
| YS000545_saliva.spades.bin.26                                | {'K02108','K02109','K02112','K02111','K02115','K02110','K02113'}          | M00157 |
| GCA_946408075.1_SRR12081296_bin.6_metaWRAP_v1.3_MAG_genomic  | {'K15633','K00927','K01689','K01803','K00134','K00873'}                   | M00002 |
| GCA_946408075.1_SRR12081296_bin.6_metaWRAP_v1.3_MAG_genomic  | {'K01897'}                                                                | M00086 |
| GCA_017541245.1_ASM1754124v1_genomic                         | {'K00927','K01689','K01803','K00134','K00873'}                            | M00002 |
| GCA_017541245.1_ASM1754124v1_genomic                         | {'K01897'}                                                                | M00086 |
| GCA_017541245.1_ASM1754124v1_genomic                         | {'K00625','K00925'}                                                       | M00579 |
| RDPYD18088968_A_saliva.metaspades.bin.21                     | {'K01834','K00927','K01689','K01803','K00134','K00873'}                   | M00002 |
| RDPYD18088968_A_saliva.metaspades.bin.21                     | {'K02108','K02115','K02110','K02113','K02109','K02112','K02111','K02114'} | M00157 |
| YS000207_saliva.spades.bin.17                                | {'K01834','K00927','K01803','K00134','K00873'}                            | M00002 |
| YS000207_saliva.spades.bin.17                                | {'K02108','K02115','K02110','K02113','K02109','K02112','K02111','K02114'} | M00157 |
| GCA_017510845.1                                              | {'K15633','K00927','K01689','K01803','K00134','K00873'}                   | M00002 |
| RDPYD18300362_A_saliva.metaspades.bin.83                     | {'K01834','K00927','K01689','K01803','K00134','K00873'}                   | M00002 |
| RDPYD18300362_A_saliva.metaspades.bin.83                     | {'K02108','K02115','K02110','K02113','K02109','K02112','K02111','K02114'} | M00157 |
| RSZYD18187595_A_saliva.metaspades.bin.7                      | {'K01834','K00927','K01803','K00134','K00873'}                            | M00002 |
| RSZYD18187595_A_saliva.metaspades.bin.7                      | {'K02108','K02115','K02110','K02113','K02109','K02112','K02111','K02114'} | M00157 |
| RSZYD18187174_A_saliva.metaspades.bin.29                     | {'K00927','K01689','K01803','K00134','K00873'}                            | M00002 |
| RSZYD18187174_A_saliva.metaspades.bin.29                     | {'K00625','K00925'}                                                       | M00579 |
| GCA_010014515.1_ASM1001451v1_genomic                         | {'K01834','K00927','K01689','K01803','K00134','K00873'}                   | M00002 |
| GCA_010014515.1_ASM1001451v1_genomic                         | {'K02108','K02115','K02110','K02113','K02109','K02112','K02111','K02114'} | M00157 |
| RDPYD18098469_A_saliva.metaspades.bin.33                     | {'K01834','K00927','K01689','K01803','K00134','K00873'}                   | M00002 |
| RDPYD18098469_A_saliva.metaspades.bin.33                     | {'K02108','K02115','K02110','K02113','K02109','K02112','K02111','K02114'} | M00157 |
| RDPYD18300101_A_saliva.metaspades.bin.29                     | {'K01834','K00927','K01689','K01803','K00134','K00873'}                   | M00002 |
| RDPYD18300101_A_saliva.metaspades.bin.29                     | {'K02108','K02115','K02110','K02113','K02109','K02112','K02111','K02114'} | M00157 |
| R0170300224_tooth_RA.megahit.bin.94                          | {'K15633','K00927','K01689','K01803','K00134','K00873'}                   | M00002 |
| R0170300224_tooth_RA.megahit.bin.94                          | {'K00625','K00925'}                                                       | M00579 |
| R0170300157_tooth_RA.megahit.bin.55                          | {'K01834','K00927','K01689','K01803','K00134','K00873'}                   | M00002 |
| R0170300157_tooth_RA.megahit.bin.55                          | {'K02108','K02109','K02112','K02111','K02115','K02110','K02114'}          | M00157 |
| RSZAXPI002613-24_RA_dental.metaspades.bin.48                 | {'K00927','K01689','K01803','K00134','K00873'}                            | M00002 |
| RSZAXPI002613-24_RA_dental.metaspades.bin.48                 | {'K02108','K02115','K02110','K02113','K02109','K02112','K02111','K02114'} | M00157 |
| SZAXPI018317-19_RA_dental.metaspades.bin.69                  | {'K01834','K00927','K01689','K01803','K00134','K00873'}                   | M00002 |
| R0170300266_tooth_RAH.megahit.bin.13                         | {'K15633','K00927','K01689','K01803','K00134','K00873'}                   | M00002 |
| R0170300266_tooth_RAH.megahit.bin.13                         | {'K02108','K02115','K02110','K02113','K02109','K02112','K02111','K02114'} | M00157 |
| R0170300253_tooth_RAH.megahit.bin.35                         | {'K01834','K01689','K01803','K00134','K00873'}                            | M00002 |
| R0170300253_tooth_RAH.megahit.bin.35                         | {'K02108','K02115','K02110','K02113','K02109','K02112','K02111','K02114'} | M00157 |
| RSZYD18187457_A_saliva.metaspades.bin.42                     | {'K01834','K00927','K01689','K01803','K00134','K00873'}                   | M00002 |
| RSZYD18187457_A_saliva.metaspades.bin.42                     | {'K02108','K02115','K02110','K02113','K02109','K02112','K02111','K02114'} | M00157 |
| RSZYD18078140_A_saliva.metaspades.bin.44                     | {'K15633','K00927','K01689','K01803','K00134','K00873'}                   | M00002 |
| RSZYD18078140_A_saliva.metaspades.bin.44                     | {'K00625','K00925'}                                                       | M00579 |
| RDPYD18300014_A_saliva.metaspades.bin.15                     | {'K01834','K00927','K01689','K01803','K00134'}                            | M00002 |
| RDPYD18300014_A_saliva.metaspades.bin.15                     | {'K02108','K02115','K02110','K02113','K02109','K02112','K02111','K02114'} | M00157 |
| GCA_947302975.1_SRR10912535_bin.55_metaWRAP_v1.3_MAG_genomic | {'K15633','K00927','K01689','K01803','K00134','K00873'}                   | M00002 |
| GCA_947302975.1_SRR10912535_bin.55_metaWRAP_v1.3_MAG_genomic | {'K01897'}                                                                | M00086 |
| R0170300308_tooth_RAH.megahit.bin.44                         | {'K01834','K01689','K01803','K00134','K00873'}                            | M00002 |
| R0170300308_tooth_RAH.megahit.bin.44                         | {'K02108','K02115','K02110','K02113','K02109','K02112','K02111','K02114'} | M00157 |
| RDPYD18097621_A_saliva.metaspades.bin.14                     | {'K01834','K00927','K01689','K01803','K00134','K00873'}                   | M00002 |
| RDPYD18097621_A_saliva.metaspades.bin.14                     | {'K02108','K02115','K02110','K02113','K02109','K02112','K02111','K02114'} | M00157 |
| RSZYD18187275_A_saliva.metaspades.bin.59                     | {'K01834','K00927','K01689','K01803','K00134','K00873'}                   | M00002 |
| GCA_001790385.1_ASM179038v1_genomic                          | {'K00927','K01803','K00134','K00873'}                                     | M00002 |
| GCA_001790385.1_ASM179038v1_genomic                          | {'K02108','K02115','K02110','K02113','K02109','K02112','K02111','K02114'} | M00157 |
| GCA_947388865.1_SRR15214599_bin.4_metawrap_v1.3_MAG_genomic  | {'K15633','K00927','K01689','K01803','K00134','K00873'}                   | M00002 |
| GCA_947388865.1_SRR15214599_bin.4_metawrap_v1.3_MAG_genomic  | {'K00625','K00925'}                                                       | M00579 |
| R0170300192_tooth_RA.megahit.bin.84                          | {'K00927','K01689','K01803','K00134','K00873'}                            | M00002 |
| R0170300192_tooth_RA.megahit.bin.84                          | {'K02108','K02115','K02110','K02113','K02109','K02112','K02111','K02114'} | M00157 |
| RSZAXPI002613-24_RA_dental.metaspades.bin.37                 | {'K01834','K00927','K01689','K01803','K00134','K00873'}                   | M00002 |
| RSZAXPI002613-24_RA_dental.metaspades.bin.37                 | {'K02108','K02109','K02112','K02111','K02115','K02110','K02114'}          | M00157 |
| R0170300378_saliva.megahit.bin.43                            | {'K01834','K00927','K01689','K01803','K00134','K00873'}                   | M00002 |
| GCA_017516075.1_ASM1751607v1_genomic                         | {'K15633','K01689','K01803','K00134'}                                     | M00002 |
| GCA_017516075.1_ASM1751607v1_genomic                         | {'K01897'}                                                                | M00086 |



|                                                              |                                                                           |        |
|--------------------------------------------------------------|---------------------------------------------------------------------------|--------|
| GCA_017516075.1_ASM1751607v1_genomic                         | {'K00625','K00925'}                                                       | M00579 |
| GCA_017515265.1_ASM1751526v1_genomic                         | {'K15633','K00927','K01689','K01803','K00134','K00873'}                   | M00002 |
| GCA_017515265.1_ASM1751526v1_genomic                         | {'K01897'}                                                                | M00086 |
| YS001052_saliva.spades.bin.13                                | {'K01834','K00927','K01689','K01803','K00134','K00873'}                   | M00002 |
| YS001052_saliva.spades.bin.13                                | {'K02108','K02115','K02110','K02113','K02109','K02112','K02111','K02114'} | M00157 |
| R0170300070_tooth_RAH.megahit.bin.58                         | {'K15633','K00927','K01689','K01803','K00134','K00873'}                   | M00002 |
| R0170300070_tooth_RAH.megahit.bin.58                         | {'K00625','K00925'}                                                       | M00579 |
| GCA_017557865.1_ASM1755786v1_genomic                         | {'K15633','K00927','K15634','K01689','K01803','K00134','K00873'}          | M00002 |
| GCA_017557865.1_ASM1755786v1_genomic                         | {'K01897'}                                                                | M00086 |
| R0170300288_tooth_RAH.megahit.bin.40                         | {'K01834','K01689','K01803','K00134','K00873'}                            | M00002 |
| RSZYD18078100_A_saliva.metaspades.bin.89                     | {'K15633','K00927','K01689','K01803','K00134','K00873'}                   | M00002 |
| RSZYD18078100_A_saliva.metaspades.bin.89                     | {'K00625','K00925'}                                                       | M00579 |
| GCA_009777315.1_ASM977731v1_genomic                          | {'K00927','K01689','K01803','K00134','K00873'}                            | M00002 |
| GCA_009777315.1_ASM977731v1_genomic                          | {'K00625','K00925'}                                                       | M00579 |
| GCA_016700015.1_ASM1670001v1_genomic                         | {'K00927','K01803','K00134','K00873'}                                     | M00002 |
| GCA_016700015.1_ASM1670001v1_genomic                         | {'K02108','K02115','K02110','K02113','K02109','K02112','K02111','K02114'} | M00157 |
| R0170300219_tooth_RAH.megahit.bin.1                          | {'K15633','K00927','K01689','K01803','K00134','K00873'}                   | M00002 |
| R0170300219_tooth_RAH.megahit.bin.1                          | {'K02108','K02115','K02110','K02113','K02109','K02112','K02111','K02114'} | M00157 |
| RSZYD18078262_A_saliva.metaspades.bin.69                     | {'K01834','K00927','K01689','K01803','K00134','K00873'}                   | M00002 |
| GCA_013333815.2_ASM1333381v2_genomic                         | {'K00927','K01689','K01803','K00134','K00873'}                            | M00002 |
| GCA_013333815.2_ASM1333381v2_genomic                         | {'K02108','K02115','K02110','K02113','K02109','K02112','K02111','K02114'} | M00157 |
| RSZAXPI002675-22_RA_dental.metaspades.bin.45                 | {'K01834','K00927','K01689','K01803','K00134','K00873'}                   | M00002 |
| SZAXPI018318-20_RA_dental.metaspades.bin.6                   | {'K01834','K01689','K00873'}                                              | M00002 |
| SZAXPI018318-20_RA_dental.metaspades.bin.6                   | {'K02108','K02115','K02110','K02113','K02109','K02112','K02111','K02114'} | M00157 |
| GCA_027356125.1_ASM2735612v1_genomic                         | {'K02108','K02109','K02112','K02111','K02115','K02110','K02114'}          | M00157 |
| RDPYD18088985_A_saliva.metaspades.bin.11                     | {'K01834','K00927','K01689','K01803','K00134','K00873'}                   | M00002 |
| RDPYD18088985_A_saliva.metaspades.bin.11                     | {'K02108','K02115','K02110','K02113','K02109','K02112','K02111','K02114'} | M00157 |
| SZAXPI018092-13_RA_dental.metaspades.bin.42                  | {'K01834','K01689','K01803','K00134','K00873'}                            | M00002 |
| SZAXPI018092-13_RA_dental.metaspades.bin.42                  | {'K02108','K02115','K02110','K02113','K02109','K02112','K02111','K02114'} | M00157 |
| R0170300302_tooth_RAH.megahit.bin.78                         | {'K01834','K01689','K00873'}                                              | M00002 |
| R0170300302_tooth_RAH.megahit.bin.78                         | {'K02108','K02115','K02110','K02113','K02109','K02112','K02111','K02114'} | M00157 |
| RSZAXPI002304-13_RAH_dental.metaspades.bin.45                | {'K00927','K01689','K01803','K00134','K00873'}                            | M00002 |
| RSZAXPI002304-13_RAH_dental.metaspades.bin.45                | {'K02108','K02115','K02110','K02113','K02109','K02112','K02111','K02114'} | M00157 |
| R0170300277_tooth_RAH.megahit.bin.101                        | {'K00927','K01689','K01803','K00134','K00873'}                            | M00002 |
| R0170300277_tooth_RAH.megahit.bin.101                        | {'K02108','K02115','K02110','K02113','K02109','K02112','K02111','K02114'} | M00157 |
| R0170300267_tooth_RAH.megahit.bin.31                         | {'K00927','K01689','K01803','K00134','K00873'}                            | M00002 |
| R0170300267_tooth_RAH.megahit.bin.31                         | {'K02108','K02115','K02110','K02113','K02109','K02112','K02111','K02114'} | M00157 |
| GCA_015257495.1_ASM1525749v1_genomic                         | {'K01834','K00927','K01689','K01803','K00134','K00873'}                   | M00002 |
| GCA_015257495.1_ASM1525749v1_genomic                         | {'K02108','K02115','K02110','K02113','K02109','K02112','K02111','K02114'} | M00157 |
| RDPYD18097648_A_saliva.metaspades.bin.17                     | {'K01834','K00927','K01689','K01803','K00134','K00873'}                   | M00002 |
| RDPYD18097648_A_saliva.metaspades.bin.17                     | {'K02108','K02115','K02110','K02113','K02109','K02112','K02111','K02114'} | M00157 |
| RDPYD18201957_A_saliva.metaspades.bin.16                     | {'K01834','K00927','K01689','K01803','K00134','K00873'}                   | M00002 |
| RDPYD18098326_A_saliva.metaspades.bin.7                      | {'K01834','K00927','K01689','K01803','K00134','K00873'}                   | M00002 |
| RSZYD18187344_A_saliva.metaspades.bin.71                     | {'K15633','K00927','K01689','K01803','K00134','K00873'}                   | M00002 |
| RSZYD18187344_A_saliva.metaspades.bin.71                     | {'K00625','K00925'}                                                       | M00579 |
| GCA_016286785.1_ASM1628678v1_genomic                         | {'K15633','K00927','K01689','K01803','K00134','K00873'}                   | M00002 |
| GCA_016286785.1_ASM1628678v1_genomic                         | {'K01897'}                                                                | M00086 |
| GCA_016286785.1_ASM1628678v1_genomic                         | {'K00625','K00925'}                                                       | M00579 |
| RSZAXPI002617-32_RA_dental.metaspades.bin.17                 | {'K01834','K00927','K01689','K01803','K00134','K00873'}                   | M00002 |
| RSZAXPI002617-32_RA_dental.metaspades.bin.17                 | {'K02108','K02115','K02110','K02113','K02109','K02112','K02111','K02114'} | M00157 |
| RSZYD18078630_A_saliva.metaspades.bin.13                     | {'K01834','K00927','K01689','K01803','K00134','K00873'}                   | M00002 |
| RSZYD18078630_A_saliva.metaspades.bin.13                     | {'K02108','K02115','K02110','K02113','K02109','K02112','K02111','K02114'} | M00157 |
| RSZYD18187640_A_saliva.metaspades.bin.22                     | {'K01834','K00927','K01689','K01803','K00134','K00873'}                   | M00002 |
| RSZYD18187640_A_saliva.metaspades.bin.22                     | {'K02108','K02115','K02110','K02113','K02109','K02112','K02111','K02114'} | M00157 |
| RDPYD18189836_A_saliva.metaspades.bin.24                     | {'K01834','K00927','K01689','K01803','K00134','K00873'}                   | M00002 |
| RDPYD18189836_A_saliva.metaspades.bin.24                     | {'K02108','K02115','K02110','K02113','K02109','K02112','K02111','K02114'} | M00157 |
| R0170300271_tooth_RAH.megahit.bin.109                        | {'K15633','K00927','K01689','K01803','K00134','K00873'}                   | M00002 |
| R0170300271_tooth_RAH.megahit.bin.109                        | {'K02108','K02115','K02110','K02113','K02109','K02112','K02111','K02114'} | M00157 |
| RDPYD18201891_A_saliva.metaspades.bin.24                     | {'K01834','K00927','K01803','K00134','K00873'}                            | M00002 |
| RSZYD18078673_A_saliva.metaspades.bin.3                      | {'K01834','K00927','K01689','K01803','K00134','K00873'}                   | M00002 |
| RSZYD18078673_A_saliva.metaspades.bin.3                      | {'K02108','K02115','K02110','K02113','K02109','K02112','K02111','K02114'} | M00157 |
| GCA_018062805.1_ASM1806280v1_genomic                         | {'K00927','K01689','K01803','K00134','K00873'}                            | M00002 |
| GCA_018062805.1_ASM1806280v1_genomic                         | {'K02108','K02115','K02110','K02113','K02109','K02112','K02111','K02114'} | M00157 |
| R0170300119_tooth_RAH.megahit.bin.12                         | {'K00927','K01689','K01803','K00134','K00873'}                            | M00002 |
| RSZYD18187273_A_saliva.metaspades.bin.58                     | {'K01834','K00927','K01689','K01803','K00134','K00873'}                   | M00002 |
| RSZYD18187273_A_saliva.metaspades.bin.58                     | {'K02108','K02115','K02110','K02113','K02109','K02112','K02111','K02114'} | M00157 |
| RSZYD18078748_A_saliva.metaspades.bin.42                     | {'K01834','K00927','K01689','K01803','K00134','K00873'}                   | M00002 |
| GCA_024635455.1_ASM2463545v1_genomic                         | {'K01834','K00927','K01689','K01803','K00134','K00873'}                   | M00002 |
| GCA_024635455.1_ASM2463545v1_genomic                         | {'K02108','K02109','K02112','K02111','K02115','K02113','K02114'}          | M00157 |
| RSZYD18187112_A_saliva.metaspades.bin.35                     | {'K01834','K00927','K01689','K01803','K00134','K00873'}                   | M00002 |
| GCA_027311865.1_ASM2731186v1_genomic                         | {'K00927','K01803','K00134','K00873'}                                     | M00002 |
| GCA_027311865.1_ASM2731186v1_genomic                         | {'K02108','K02115','K02110','K02113','K02109','K02112','K02111','K02114'} | M00157 |
| RDPYD18300075_A_saliva.metaspades.bin.22                     | {'K01834','K00927','K01689','K01803','K00134','K00873'}                   | M00002 |
| RDPYD18300075_A_saliva.metaspades.bin.22                     | {'K02108','K02115','K02110','K02113','K02109','K02112','K02111','K02114'} | M00157 |
| GCA_027426915.1_ASM2742691v1_genomic                         | {'K00927','K01803','K00134','K00873'}                                     | M00002 |
| GCA_027426915.1_ASM2742691v1_genomic                         | {'K02108','K02109','K02112','K02111','K02115','K02110','K02114'}          | M00157 |
| GCA_027426915.1_ASM2742691v1_genomic                         | {'K02298','K02300','K02297','K02299'}                                     | M00417 |
| SZAXPI018391-27_RA_saliva.metaspades.bin.47                  | {'K15633','K00927','K01689','K01803','K00134','K00873'}                   | M00002 |
| SZAXPI018391-27_RA_saliva.metaspades.bin.47                  | {'K00625','K00925'}                                                       | M00579 |
| R0170300323_tooth_RAH.megahit.bin.22                         | {'K15633','K00927','K01689','K01803','K00134','K00873'}                   | M00002 |
| R0170300323_tooth_RAH.megahit.bin.22                         | {'K00625','K00925'}                                                       | M00579 |
| RSZYD18078454_A_saliva.metaspades.bin.52                     | {'K01834','K00927','K01689','K01803','K00134','K00873'}                   | M00002 |
| RSZYD18078454_A_saliva.metaspades.bin.52                     | {'K02108','K02115','K02110','K02113','K02109','K02112','K02111','K02114'} | M00157 |
| GCA_003523165.1_ASM352316v1_genomic                          | {'K00927','K01803','K00134','K00873'}                                     | M00002 |
| GCA_003523165.1_ASM352316v1_genomic                          | {'K02108','K02115','K02110','K02113','K02109','K02112','K02111','K02114'} | M00157 |
| GCA_003523165.1_ASM352316v1_genomic                          | {'K02298','K02300','K02297','K02299'}                                     | M00417 |
| RSZYD18187002_A_saliva.metaspades.bin.39                     | {'K15633','K00927','K01689','K01803','K00134','K00873'}                   | M00002 |
| RSZYD18187002_A_saliva.metaspades.bin.39                     | {'K00625','K00925'}                                                       | M00579 |
| SZAXPI011699-166_RA_dental.metaspades.bin.38                 | {'K00927','K01689','K01803','K00134','K00873'}                            | M00002 |
| SZAXPI011699-166_RA_dental.metaspades.bin.38                 | {'K02108','K02115','K02110','K02113','K02109','K02112','K02111','K02114'} | M00157 |
| R0170300172_tooth_RAH.megahit.bin.52                         | {'K01834','K00927','K01689','K01803','K00134','K00873'}                   | M00002 |
| GCA_027426975.1_ASM2742697v1_genomic                         | {'K00927','K01803','K00134','K00873'}                                     | M00002 |
| GCA_027426975.1_ASM2742697v1_genomic                         | {'K02108','K02109','K02112','K02111','K02115','K02110','K02114'}          | M00157 |
| GCA_027426975.1_ASM2742697v1_genomic                         | {'K02298','K02300','K02297','K02299'}                                     | M00417 |
| R0170300248_tooth_RAH.megahit.bin.109                        | {'K01834','K00927','K01689','K01803','K00134','K00873'}                   | M00002 |
| R0170300248_tooth_RAH.megahit.bin.109                        | {'K00625','K00925'}                                                       | M00579 |
| GCA_027450165.1_ASM2745016v1_genomic                         | {'K00927','K01803','K00134','K00873'}                                     | M00002 |
| GCA_027450165.1_ASM2745016v1_genomic                         | {'K02108','K02115','K02110','K02113','K02109','K02112','K02111','K02114'} | M00157 |
| GCA_027450165.1_ASM2745016v1_genomic                         | {'K02298','K02300','K02297','K02299'}                                     | M00417 |
| GCA_025273655.1_ASM2527365v1_genomic                         | {'K00927','K01803','K00134','K00873'}                                     | M00002 |
| GCA_025273655.1_ASM2527365v1_genomic                         | {'K02108','K02112','K02111','K02115','K02110','K02113','K02114'}          | M00157 |
| GCA_025273655.1_ASM2527365v1_genomic                         | {'K02298','K02300','K02297','K02299'}                                     | M00417 |
| GCA_946407955.1_SRR12081294_bin.80_metaWRAP_v1.3_MAG_genomic | {'K15633','K00927','K01689','K01803','K00134','K00873'}                   | M00002 |
| GCA_946407955.1_SRR12081294_bin.80_metaWRAP_v1.3_MAG_genomic | {'K00625','K00925'}                                                       | M00579 |
| RSZYD18078467_A_saliva.metaspades.bin.16                     | {'K01834','K00927','K01689','K01803','K00134','K00873'}                   | M00002 |



|                                                              |                                                                           |        |
|--------------------------------------------------------------|---------------------------------------------------------------------------|--------|
| R0170300253 tooth_RAH.megahit.bin.118                        | {'K00927','K01689','K01803','K00134','K00873'}                            | M00002 |
| R0170300253 tooth_RAH.megahit.bin.118                        | {'K02108','K02115','K02110','K02113','K02109','K02112','K02111','K02114'} | M00157 |
| RSZYD18078148 A_saliva.metaspades.bin.88                     | {'K01834','K00927','K01689','K01803','K00134','K00873'}                   | M00002 |
| RSZYD18078148 A_saliva.metaspades.bin.88                     | {'K02108','K02109','K02112','K02115','K02110','K02113','K02114'}          | M00157 |
| R0170300223 tooth_RA.megahit.bin.25                          | {'K15633','K00927','K01689','K01803','K00134','K00873'}                   | M00002 |
| R0170300223 tooth_RA.megahit.bin.25                          | {'K00625','K00925'}                                                       | M00579 |
| R0170300269 tooth_RAH.megahit.bin.68                         | {'K01834','K01689','K01803','K00134','K00873'}                            | M00002 |
| R0170300269 tooth_RAH.megahit.bin.68                         | {'K02108','K02115','K02110','K02113','K02109','K02112','K02111','K02114'} | M00157 |
| R0170300203 tooth_RA.megahit.bin.90                          | {'K15633','K00927','K01689','K01803','K00134','K00873'}                   | M00002 |
| R0170300203 tooth_RA.megahit.bin.90                          | {'K00625','K00925'}                                                       | M00579 |
| RSZAXPI002321-33_RAH_dental.metaspades.bin.29                | {'K01834','K00927','K01689','K01803','K00134','K00873'}                   | M00002 |
| R0170300241 tooth_RAH.megahit.bin.28                         | {'K02108','K02109','K02111','K02115','K02110','K02113'}                   | M00157 |
| SZAXPI018190-56_RA_dental.metaspades.bin.44                  | {'K02108','K02109','K02110','K02113'}                                     | M00157 |
| YS001023_saliva.spades.bin.13                                | {'K01834','K00927','K01689','K01803','K00134','K00873'}                   | M00002 |
| YS001023_saliva.spades.bin.13                                | {'K02108','K02115','K02110','K02113','K02109','K02112','K02111','K02114'} | M00157 |
| R0170300127 tooth_RA.megahit.bin.7                           | {'K01834','K00927','K01689','K01803','K00134','K00873'}                   | M00002 |
| YS001132_saliva.spades.bin.25                                | {'K01834','K00927','K01689','K01803','K00873'}                            | M00002 |
| YS001132_saliva.spades.bin.25                                | {'K02108','K02109','K02112','K02111','K02115','K02110','K02113'}          | M00157 |
| RSZYD18078615 A_saliva.metaspades.bin.45                     | {'K01834','K00927','K01689','K01803','K00134','K00873'}                   | M00002 |
| RSZYD18078615 A_saliva.metaspades.bin.45                     | {'K02108','K02115','K02110','K02113','K02109','K02112','K02111','K02114'} | M00157 |
| GCA_018001155.1_ASM1800115v1_genomic                         | {'K00927','K01689','K01803','K00134','K00873'}                            | M00002 |
| GCA_018001155.1_ASM1800115v1_genomic                         | {'K02108','K02115','K02110','K02113','K02109','K02112','K02111','K02114'} | M00157 |
| RSZYD18187792 A_saliva.metaspades.bin.31                     | {'K01834','K00927','K01689','K01803','K00134','K00873'}                   | M00002 |
| RSZYD18187792 A_saliva.metaspades.bin.31                     | {'K02108','K02109','K02111','K02115','K02110','K02113'}                   | M00157 |
| GCA_027314885.1_ASM2731488v1_genomic                         | {'K00927','K01803','K00134','K00873'}                                     | M00002 |
| GCA_027314885.1_ASM2731488v1_genomic                         | {'K02108','K02109','K02112','K02111','K02115','K02110','K02114'}          | M00157 |
| GCA_027314885.1_ASM2731488v1_genomic                         | {'K02298','K02300','K02297','K02299'}                                     | M00417 |
| R0170300231 tooth_RA.megahit.bin.10                          | {'K00927','K01689','K01803','K00134','K00873'}                            | M00002 |
| R0170300231 tooth_RA.megahit.bin.10                          | {'K02108','K02115','K02110','K02113','K02109','K02112','K02111','K02114'} | M00157 |
| RSZYD18187389 A_saliva.metaspades.bin.6                      | {'K01834','K00927','K01689','K01803','K00134','K00873'}                   | M00002 |
| RSZYD18187389 A_saliva.metaspades.bin.6                      | {'K02108','K02115','K02110','K02113','K02109','K02112','K02111','K02114'} | M00157 |
| GCA_947428935.1_SRR19981124_bin.14_metawrap_v1.3_MAG_genomic | {'K15633','K00927','K01689','K01803','K00134','K00873'}                   | M00002 |
| GCA_947428935.1_SRR19981124_bin.14_metawrap_v1.3_MAG_genomic | {'K00925','K00625','K13788'}                                              | M00579 |
| RSZYD18187171 A_saliva.metaspades.bin.47                     | {'K01834','K00927','K01689','K01803','K00134','K00873'}                   | M00002 |
| RSZYD18187171 A_saliva.metaspades.bin.47                     | {'K02108','K02115','K02110','K02113','K02109','K02112','K02111','K02114'} | M00157 |
| SZAXPI018322-24_RA_dental.metaspades.bin.62                  | {'K00927','K01689','K01803','K00134','K00873'}                            | M00002 |
| SZAXPI018322-24_RA_dental.metaspades.bin.62                  | {'K02108','K02115','K02110','K02113','K02109','K02112','K02111','K02114'} | M00157 |
| GCA_947090635.1_SRR11749285_bin.3_metaWRAP_v1.3_MAG_genomic  | {'K01834','K00927','K01689','K01803','K00134','K00873'}                   | M00002 |
| GCA_947090635.1_SRR11749285_bin.3_metaWRAP_v1.3_MAG_genomic  | {'K01897'}                                                                | M00086 |
| R0170300165 tooth_RA.megahit.bin.12                          | {'K00927','K01689','K01803','K00134','K00873'}                            | M00002 |
| R0170300165 tooth_RA.megahit.bin.12                          | {'K02108','K02115','K02110','K02113','K02109','K02112','K02111','K02114'} | M00157 |
| RSZYD18187002 A_saliva.metaspades.bin.59                     | {'K01834','K00927','K01689','K01803','K00134','K00873'}                   | M00002 |
| RSZYD18187002 A_saliva.metaspades.bin.59                     | {'K02108','K02115','K02110','K02113','K02109','K02112','K02111','K02114'} | M00157 |
| GCA_017459765.1                                              | {'K15633','K00927','K01689','K01803','K00134','K00873'}                   | M00002 |
| GCA_017459765.1                                              | {'K01897'}                                                                | M00086 |
| GCA_017459765.1                                              | {'K00625','K00925'}                                                       | M00579 |
| GCA_947362105.1_SRR15194760_bin.16_metawrap_v1.3_MAG_genomic | {'K15633','K00927','K01689','K01803','K00134','K00873'}                   | M00002 |
| GCA_947362105.1_SRR15194760_bin.16_metawrap_v1.3_MAG_genomic | {'K00925','K00625','K13788'}                                              | M00579 |
| RSZAXPI002629-81_RA_dental.metaspades.bin.82                 | {'K01834','K00927','K01689','K01803','K00873'}                            | M00002 |
| GCA_947366635.1_SRR15322614_bin.1_metawrap_v1.3_MAG_genomic  | {'K15633','K00927','K01803','K00134','K00873'}                            | M00002 |
| RSZYD18078807 A_saliva.metaspades.bin.46                     | {'K01834','K00927','K01689','K01803','K00134','K00873'}                   | M00002 |
| RSZYD18078807 A_saliva.metaspades.bin.46                     | {'K02108','K02109','K02110','K02113'}                                     | M00157 |
| GCA_016178135.1_ASM1617813v1_genomic                         | {'K00927','K01803','K00134','K00873'}                                     | M00002 |
| GCA_016178135.1_ASM1617813v1_genomic                         | {'K02108','K02115','K02110','K02113','K02109','K02112','K02111','K02114'} | M00157 |
| GCA_016178135.1_ASM1617813v1_genomic                         | {'K02298','K02300','K02297','K02299'}                                     | M00417 |
| GCA_947304955.1_SRR10912542_bin.53_metaWRAP_v1.3_MAG_genomic | {'K15633','K00927','K01689','K01803','K00134','K00873'}                   | M00002 |
| R0170300128 tooth_RA.megahit.bin.9                           | {'K01834','K00927','K01689','K01803','K00134','K00873'}                   | M00002 |
| R0170300128 tooth_RA.megahit.bin.9                           | {'K02108','K02112','K02111','K02115','K02110','K02114'}                   | M00157 |
| GCA_905373345.1_SRR9217464-mag-bin.7_genomic                 | {'K02108','K02115','K02110','K02113','K02109','K02112','K02111','K02114'} | M00157 |
| RSZYD18187442 A_saliva.metaspades.bin.35                     | {'K01834','K00927','K01689','K01803','K00134','K00873'}                   | M00002 |
| RSZYD18187442 A_saliva.metaspades.bin.35                     | {'K02108','K02115','K02110','K02113','K02109','K02112','K02111','K02114'} | M00157 |
| R0170300077 tooth_RA.megahit.bin.6                           | {'K00927','K01689','K01803','K00134','K00873'}                            | M00002 |
| R0170300077 tooth_RA.megahit.bin.6                           | {'K02108','K02115','K02110','K02113','K02109','K02112','K02111','K02114'} | M00157 |
| YS000394_saliva.spades.bin.25                                | {'K01834','K00927','K01689','K01803','K00134','K00873'}                   | M00002 |
| YS000394_saliva.spades.bin.25                                | {'K02108','K02109','K02112','K02110','K02113','K02114'}                   | M00157 |
| YS000532_saliva.spades.bin.18                                | {'K01834','K00927','K01689','K01803','K00134','K00873'}                   | M00002 |
| YS000532_saliva.spades.bin.18                                | {'K02108','K02115','K02110','K02113','K02109','K02112','K02111','K02114'} | M00157 |
| GCA_027426835.1_ASM2742683v1_genomic                         | {'K00927','K15634','K01803','K00134','K00873'}                            | M00002 |
| GCA_027426835.1_ASM2742683v1_genomic                         | {'K02108','K02109','K02112','K02111','K02115','K02110','K02114'}          | M00157 |
| GCA_027426835.1_ASM2742683v1_genomic                         | {'K02298','K02300','K02297','K02299'}                                     | M00417 |
| RSZYD18187119 A_saliva.metaspades.bin.9                      | {'K01834','K00927','K01689','K01803','K00134','K00873'}                   | M00002 |
| YS000546_saliva.spades.bin.3                                 | {'K01834','K00927','K01689','K01803','K00134','K00873'}                   | M00002 |
| YS000546_saliva.spades.bin.3                                 | {'K02108','K02115','K02110','K02113','K02109','K02112','K02111','K02114'} | M00157 |
| GCA_946406315.1_SRR12081301_bin.45_metaWRAP_v1.3_MAG_genomic | {'K15633','K00927','K01689','K01803','K00134','K00873'}                   | M00002 |
| GCA_946406315.1_SRR12081301_bin.45_metaWRAP_v1.3_MAG_genomic | {'K00625','K00925'}                                                       | M00579 |
| R0170300226 tooth_RA.megahit.bin.18                          | {'K00927','K01689','K01803','K00134','K00873'}                            | M00002 |
| R0170300226 tooth_RA.megahit.bin.18                          | {'K02108','K02115','K02110','K02113','K02109','K02112','K02111','K02114'} | M00157 |
| YS000274_saliva.spades.bin.38                                | {'K01834','K00927','K01689','K01803','K00134','K00873'}                   | M00002 |
| YS000274_saliva.spades.bin.38                                | {'K02108','K02109','K02112','K02115','K02110','K02113','K02114'}          | M00157 |
| GCA_017992295.1_ASM1799229v1_genomic                         | {'K01689','K01803','K00134','K00873'}                                     | M00002 |
| GCA_017992295.1_ASM1799229v1_genomic                         | {'K01897'}                                                                | M00086 |
| GCA_017992295.1_ASM1799229v1_genomic                         | {'K02112','K02111','K02115','K02114'}                                     | M00157 |
| SZAXPI018275-88_RA_dental.metaspades.bin.38                  | {'K01834','K01689','K01803','K00134','K00873'}                            | M00002 |
| SZAXPI018275-88_RA_dental.metaspades.bin.38                  | {'K02108','K02115','K02110','K02113','K02109','K02112','K02111','K02114'} | M00157 |
| GCA_900555265.1_UMGS1805_genomic                             | {'K01834','K00927','K01689','K01803','K00134','K00873'}                   | M00002 |
| GCA_900555265.1_UMGS1805_genomic                             | {'K02108','K02115','K02110','K02113','K02109','K02112','K02111','K02114'} | M00157 |
| R0170300170 tooth_RA.megahit.bin.155                         | {'K01834','K01689','K00873'}                                              | M00002 |
| R0170300170 tooth_RA.megahit.bin.155                         | {'K02108','K02115','K02110','K02113','K02109','K02112','K02111','K02114'} | M00157 |
| R0170300334_saliva_RA.megahit.bin.69                         | {'K01834','K00927','K01689','K01803','K00134','K00873'}                   | M00002 |
| R0170300334_saliva_RA.megahit.bin.69                         | {'K02108','K02115','K02110','K02113','K02109','K02112','K02111','K02114'} | M00157 |
| SZAXPI018187-45_RA_dental.metaspades.bin.28                  | {'K01834','K01689','K00873'}                                              | M00002 |
| SZAXPI018187-45_RA_dental.metaspades.bin.28                  | {'K02108','K02115','K02110','K02113','K02109','K02112','K02111','K02114'} | M00157 |
| R0170300060 tooth_RA.megahit.bin.92                          | {'K01834','K00927','K01689','K01803','K00134','K00873'}                   | M00002 |
| R0170300060 tooth_RA.megahit.bin.92                          | {'K02108','K02115','K02110','K02113','K02109','K02112','K02111','K02114'} | M00157 |
| GCA_016699935.1_ASM1669993v1_genomic                         | {'K01834','K00927','K15634','K01689','K01803','K00134','K00873'}          | M00002 |
| GCA_016699935.1_ASM1669993v1_genomic                         | {'K01897'}                                                                | M00086 |
| GCA_016699935.1_ASM1669993v1_genomic                         | {'K02108','K02115','K02110','K02113','K02109','K02112','K02111','K02114'} | M00157 |
| GCA_016699935.1_ASM1669993v1_genomic                         | {'K02298','K02300','K02297','K02299'}                                     | M00417 |
| RSZYD18187591 A_saliva.metaspades.bin.33                     | {'K01834','K00927','K01689','K01803','K00134','K00873'}                   | M00002 |
| RSZYD18187591 A_saliva.metaspades.bin.33                     | {'K02108','K02115','K02110','K02113','K02109','K02112','K02111','K02114'} | M00157 |
| R0170300213 tooth_RA.megahit.bin.4                           | {'K15633','K00927','K01689','K01803','K00134','K00873'}                   | M00002 |
| R0170300213 tooth_RA.megahit.bin.4                           | {'K02108','K02115','K02110','K02113','K02109','K02112','K02111','K02114'} | M00157 |
| R0170300302 tooth_RAH.megahit.bin.56                         | {'K01834','K00927','K01689','K01803','K00134','K00873'}                   | M00002 |
| GCA_027427195.1_ASM2742719v1_genomic                         | {'K00927','K01803','K00134','K00873'}                                     | M00002 |
| GCA_027427195.1_ASM2742719v1_genomic                         | {'K02108','K02115','K02110','K02113','K02109','K02112','K02111','K02114'} | M00157 |

|                                                              |                                                                                  |        |
|--------------------------------------------------------------|----------------------------------------------------------------------------------|--------|
| R0170300266 tooth RAH.megahit.bin.30                         | {'K01834', 'K01689', 'K01803', 'K00134', 'K00873'}                               | M00002 |
| GCA_002344715.1_ASM234471v1_genomic                          | {'K00927', 'K01803', 'K00134', 'K00873'}                                         | M00002 |
| GCA_002344715.1_ASM234471v1_genomic                          | {'K02108', 'K02112', 'K02111', 'K02115', 'K02110', 'K02113', 'K02114'}           | M00157 |
| GCA_002344715.1_ASM234471v1_genomic                          | {'K02298', 'K02300', 'K02297', 'K02299'}                                         | M00417 |
| RSZYD18187899_A_saliva.metaspades.bin.64                     | {'K01689', 'K00927', 'K01803', 'K00873'}                                         | M00002 |
| RSZYD18187899_A_saliva.metaspades.bin.64                     | {'K02109', 'K02112', 'K02111', 'K02115', 'K02110', 'K02113', 'K02114'}           | M00157 |
| GCA_947066265.1_ERR899284_bin.41_metawrap_v1.3_MAG_genomic   | {'K15633', 'K00927', 'K01689', 'K01803', 'K00134', 'K00873'}                     | M00002 |
| GCA_947066265.1_ERR899284_bin.41_metawrap_v1.3_MAG_genomic   | {'K00625', 'K00925'}                                                             | M00579 |
| GCA_002350545.1_ASM235054v1_genomic                          | {'K15633', 'K00927', 'K01689', 'K01803', 'K00134', 'K00873'}                     | M00002 |
| GCA_002350545.1_ASM235054v1_genomic                          | {'K01897'}                                                                       | M00086 |
| R0170300115_tooth_RA.megahit.bin.16                          | {'K00927', 'K01689', 'K01803', 'K00134', 'K00873'}                               | M00002 |
| R0170300115_tooth_RA.megahit.bin.16                          | {'K02108', 'K02115', 'K02110', 'K02113', 'K02109', 'K02112', 'K02111', 'K02114'} | M00157 |
| R0170300160_tooth_RA.megahit.bin.83                          | {'K02108', 'K02115', 'K02110', 'K02113', 'K02109', 'K02112', 'K02111', 'K02114'} | M00157 |
| YS000214_saliva.spades.bin.5                                 | {'K01834', 'K00927', 'K01689', 'K01803', 'K00134', 'K00873'}                     | M00002 |
| YS000214_saliva.spades.bin.5                                 | {'K02108', 'K02115', 'K02110', 'K02113', 'K02109', 'K02112', 'K02111', 'K02114'} | M00157 |
| RSZYD18078620_A_saliva.metaspades.bin.29                     | {'K01834', 'K00927', 'K01689', 'K01803', 'K00134', 'K00873'}                     | M00002 |
| RSZYD18078620_A_saliva.metaspades.bin.29                     | {'K02108', 'K02115', 'K02110', 'K02113', 'K02109', 'K02112', 'K02111', 'K02114'} | M00157 |
| R0170300296_tooth_RA.megahit.bin.125                         | {'K00927', 'K01689', 'K01803', 'K00134', 'K00873'}                               | M00002 |
| R0170300296_tooth_RA.megahit.bin.125                         | {'K02108', 'K02115', 'K02110', 'K02113', 'K02109', 'K02112', 'K02111', 'K02114'} | M00157 |
| GCA_017510665.1                                              | {'K15633', 'K00927', 'K01689', 'K01803', 'K00134', 'K00873'}                     | M00002 |
| GCA_017510665.1                                              | {'K01897'}                                                                       | M00086 |
| GCA_017510665.1                                              | {'K00625', 'K00925'}                                                             | M00579 |
| R0170300067_tooth_RA.megahit.bin.54                          | {'K00927', 'K01803', 'K00134', 'K00873'}                                         | M00002 |
| R0170300067_tooth_RA.megahit.bin.54                          | {'K02108', 'K02115', 'K02110', 'K02113', 'K02109', 'K02112', 'K02111', 'K02114'} | M00157 |
| RSZYD18078241_A_saliva.metaspades.bin.8                      | {'K01834', 'K00927', 'K01689', 'K01803', 'K00134', 'K00873'}                     | M00002 |
| RSZYD18078241_A_saliva.metaspades.bin.8                      | {'K02108', 'K02115', 'K02110', 'K02113', 'K02109', 'K02112', 'K02111', 'K02114'} | M00157 |
| RSZYD18187301_A_saliva.metaspades.bin.29                     | {'K01834', 'K00927', 'K01689', 'K01803', 'K00134', 'K00873'}                     | M00002 |
| RSZYD18187301_A_saliva.metaspades.bin.29                     | {'K02108', 'K02115', 'K02110', 'K02113', 'K02109', 'K02112', 'K02111', 'K02114'} | M00157 |
| SZAXPI018302-84_RA_dental.metaspades.bin.17                  | {'K01834', 'K01689', 'K01803', 'K00134', 'K00873'}                               | M00002 |
| SZAXPI018302-84_RA_dental.metaspades.bin.17                  | {'K02108', 'K02115', 'K02110', 'K02113', 'K02109', 'K02112', 'K02111', 'K02114'} | M00157 |
| RSZYD18187034_A_saliva.metaspades.bin.52                     | {'K01834', 'K00927', 'K01689', 'K01803', 'K00134', 'K00873'}                     | M00002 |
| RSZYD18187034_A_saliva.metaspades.bin.52                     | {'K02108', 'K02115', 'K02110', 'K02113', 'K02109', 'K02112', 'K02111', 'K02114'} | M00157 |
| R0170300110_tooth_RA.megahit.bin.53                          | {'K00927', 'K01803', 'K00134', 'K00873'}                                         | M00002 |
| R0170300265_tooth_RA.megahit.bin.69                          | {'K00927', 'K01689', 'K01803', 'K00134', 'K00873'}                               | M00002 |
| R0170300265_tooth_RA.megahit.bin.69                          | {'K02108', 'K02115', 'K02110', 'K02113', 'K02109', 'K02112', 'K02111', 'K02114'} | M00157 |
| RDPYD18098804_A_saliva.metaspades.bin.34                     | {'K01834', 'K00927', 'K01689', 'K01803', 'K00134', 'K00873'}                     | M00002 |
| RDPYD18098804_A_saliva.metaspades.bin.34                     | {'K02108', 'K02115', 'K02110', 'K02113', 'K02109', 'K02112', 'K02111', 'K02114'} | M00157 |
| R0170300114_tooth_RA.megahit.bin.70                          | {'K00927', 'K01689', 'K01803', 'K00134', 'K00873'}                               | M00002 |
| R0170300114_tooth_RA.megahit.bin.70                          | {'K02108', 'K02115', 'K02110', 'K02113', 'K02109', 'K02112', 'K02111', 'K02114'} | M00157 |
| RSZAXPI002326-41_RA_dental.metaspades.bin.24                 | {'K01834', 'K01689', 'K01803', 'K00134', 'K00873'}                               | M00002 |
| RSZAXPI002326-41_RA_dental.metaspades.bin.24                 | {'K02108', 'K02115', 'K02110', 'K02113', 'K02109', 'K02112', 'K02111', 'K02114'} | M00157 |
| GCA_015257555.2_ASM1525755v2_genomic                         | {'K00927', 'K01689', 'K01803', 'K00134', 'K00873'}                               | M00002 |
| GCA_015257555.2_ASM1525755v2_genomic                         | {'K02108', 'K02115', 'K02110', 'K02113', 'K02109', 'K02112', 'K02111', 'K02114'} | M00157 |
| GCA_016176605.1_ASM1617660v1_genomic                         | {'K15634', 'K00927', 'K01803', 'K00134'}                                         | M00002 |
| GCA_016176605.1_ASM1617660v1_genomic                         | {'K02108', 'K02112', 'K02111', 'K02115', 'K02110', 'K02113', 'K02114'}           | M00157 |
| R0170300254_tooth_RA.megahit.bin.23                          | {'K02108', 'K02115', 'K02110', 'K02113', 'K02109', 'K02112', 'K02111', 'K02114'} | M00157 |
| GCA_027356525.1_ASM2735652v1_genomic                         | {'K01834', 'K00927', 'K01803', 'K00134', 'K00873'}                               | M00002 |
| GCA_027356525.1_ASM2735652v1_genomic                         | {'K02108', 'K02109', 'K02112', 'K02111', 'K02115', 'K02110', 'K02114'}           | M00157 |
| GCA_027356525.1_ASM2735652v1_genomic                         | {'K02298', 'K02300', 'K02297', 'K02299'}                                         | M00417 |
| YS000608_saliva.spades.bin.2                                 | {'K01834', 'K00927', 'K01689', 'K01803', 'K00134', 'K00873'}                     | M00002 |
| YS000608_saliva.spades.bin.2                                 | {'K02108', 'K02109', 'K02110', 'K02113'}                                         | M00157 |
| R0170300250_tooth_RA.megahit.bin.53                          | {'K00927', 'K01689', 'K01803', 'K00134', 'K00873'}                               | M00002 |
| R0170300250_tooth_RA.megahit.bin.53                          | {'K02108', 'K02115', 'K02110', 'K02113', 'K02109', 'K02112', 'K02111', 'K02114'} | M00157 |
| GCA_017433855.1                                              | {'K15633', 'K00927', 'K01689', 'K01803', 'K00134', 'K00873'}                     | M00002 |
| GCA_017433855.1                                              | {'K01897'}                                                                       | M00086 |
| GCA_017433855.1                                              | {'K00625', 'K00925'}                                                             | M00579 |
| GCA_007131065.1_ASM713106v1_genomic                          | {'K01834', 'K00927', 'K01689', 'K01803', 'K00134', 'K00873'}                     | M00002 |
| GCA_007131065.1_ASM713106v1_genomic                          | {'K02112', 'K02111', 'K02115', 'K02114'}                                         | M00157 |
| RSZAXPI002322-34_RA_dental.metaspades.bin.14                 | {'K00927', 'K01689', 'K01803', 'K00134', 'K00873'}                               | M00002 |
| RSZAXPI002322-34_RA_dental.metaspades.bin.14                 | {'K02108', 'K02115', 'K02110', 'K02113', 'K02109', 'K02112', 'K02111', 'K02114'} | M00157 |
| R0170300296_tooth_RA.megahit.bin.95                          | {'K01834', 'K00927', 'K01689', 'K01803', 'K00134', 'K00873'}                     | M00002 |
| GCA_022828295.1_ASM2282829v1_genomic                         | {'K01834', 'K00927', 'K01689', 'K01803', 'K00134', 'K00873'}                     | M00002 |
| GCA_022828295.1_ASM2282829v1_genomic                         | {'K02108', 'K02115', 'K02110', 'K02113', 'K02109', 'K02112', 'K02111', 'K02114'} | M00157 |
| GCA_905371785.1_SRR9217391-mag-bin.4_genomic                 | {'K01834', 'K01689', 'K01803', 'K00134', 'K00873'}                               | M00002 |
| GCA_905371785.1_SRR9217391-mag-bin.4_genomic                 | {'K02108', 'K02115', 'K02110', 'K02113', 'K02109', 'K02112', 'K02111', 'K02114'} | M00157 |
| GCA_947364965.1_SRR16350202_bin.8_metawrap_v1.3_MAG_genomic  | {'K15633', 'K00927', 'K01689', 'K01803', 'K00134', 'K00873'}                     | M00002 |
| RDPYD18088989_A_saliva.metaspades.bin.19                     | {'K01834', 'K00927', 'K01689', 'K01803', 'K00134', 'K00873'}                     | M00002 |
| RDPYD18088989_A_saliva.metaspades.bin.19                     | {'K02108', 'K02115', 'K02110', 'K02113', 'K02109', 'K02112', 'K02111', 'K02114'} | M00157 |
| GCA_022828365.1_ASM2282836v1_genomic                         | {'K01834', 'K00927', 'K01689', 'K01803', 'K00134', 'K00873'}                     | M00002 |
| GCA_022828365.1_ASM2282836v1_genomic                         | {'K02108', 'K02115', 'K02110', 'K02113', 'K02109', 'K02112', 'K02111', 'K02114'} | M00157 |
| GCA_002322785.1_ASM232278v1_genomic                          | {'K00927', 'K01803', 'K00134', 'K00873'}                                         | M00002 |
| GCA_002322785.1_ASM232278v1_genomic                          | {'K02108', 'K02115', 'K02110', 'K02113', 'K02109', 'K02112', 'K02111', 'K02114'} | M00157 |
| R0170300100_tooth_RA.megahit.bin.38                          | {'K01834', 'K00927', 'K01689', 'K01803', 'K00134', 'K00873'}                     | M00002 |
| R0170300232_tooth_RA.megahit.bin.71                          | {'K01834', 'K00927', 'K01689', 'K01803', 'K00134', 'K00873'}                     | M00002 |
| GCA_007135955.1_ASM713595v1_genomic                          | {'K00927', 'K01803', 'K00134', 'K00873'}                                         | M00002 |
| GCA_007135955.1_ASM713595v1_genomic                          | {'K02108', 'K02109', 'K02112', 'K02111', 'K02115', 'K02110', 'K02114'}           | M00157 |
| R0170300211_tooth_RA.megahit.bin.23                          | {'K15633', 'K00927', 'K01689', 'K01803', 'K00134', 'K00873'}                     | M00002 |
| R0170300211_tooth_RA.megahit.bin.23                          | {'K02108', 'K02115', 'K02110', 'K02113', 'K02109', 'K02112', 'K02111', 'K02114'} | M00157 |
| YS000027_saliva.spades.bin.12                                | {'K01834', 'K00927', 'K01689', 'K01803', 'K00134'}                               | M00002 |
| YS000027_saliva.spades.bin.12                                | {'K02108', 'K02112', 'K02111', 'K02115', 'K02110', 'K02114'}                     | M00157 |
| R0170300288_tooth_RA.megahit.bin.34                          | {'K00927', 'K01689', 'K01803', 'K00134', 'K00873'}                               | M00002 |
| R0170300288_tooth_RA.megahit.bin.34                          | {'K02108', 'K02115', 'K02110', 'K02113', 'K02109', 'K02112', 'K02111', 'K02114'} | M00157 |
| R0170300219_tooth_RA.megahit.bin.79                          | {'K01834', 'K01689', 'K01803', 'K00134', 'K00873'}                               | M00002 |
| R0170300219_tooth_RA.megahit.bin.79                          | {'K02108', 'K02115', 'K02110', 'K02113', 'K02109', 'K02112', 'K02111', 'K02114'} | M00157 |
| GCA_946404545.1_SRR12081298_bin.7_metaWRAP_v1.3_MAG_genomic  | {'K15633', 'K00927', 'K01689', 'K01803', 'K00134', 'K00873'}                     | M00002 |
| GCA_946404545.1_SRR12081298_bin.7_metaWRAP_v1.3_MAG_genomic  | {'K00625', 'K00925'}                                                             | M00579 |
| SRR8114096.metaspades.bin.1                                  | {'K01834', 'K00927', 'K01689', 'K01803', 'K00134', 'K00873'}                     | M00002 |
| SRR8114096.metaspades.bin.1                                  | {'K02108', 'K02115', 'K02110', 'K02113', 'K02109', 'K02112', 'K02111', 'K02114'} | M00157 |
| GCA_027340655.1_ASM2734065v1_genomic                         | {'K00927', 'K01803', 'K00134', 'K00873'}                                         | M00002 |
| GCA_027340655.1_ASM2734065v1_genomic                         | {'K02108', 'K02115', 'K02110', 'K02113', 'K02109', 'K02112', 'K02111', 'K02114'} | M00157 |
| GCA_027340655.1_ASM2734065v1_genomic                         | {'K02298', 'K02300', 'K02299'}                                                   | M00417 |
| RDPYD18300300_A_saliva.metaspades.bin.61                     | {'K01834', 'K00927', 'K01689', 'K01803', 'K00134', 'K00873'}                     | M00002 |
| RDPYD18300300_A_saliva.metaspades.bin.61                     | {'K02108', 'K02115', 'K02110', 'K02113', 'K02109', 'K02112', 'K02111', 'K02114'} | M00157 |
| RSZAXPI002325-39_RA_dental.metaspades.bin.45                 | {'K00927', 'K01689', 'K01803', 'K00134', 'K00873'}                               | M00002 |
| RSZAXPI002325-39_RA_dental.metaspades.bin.45                 | {'K02108', 'K02115', 'K02110', 'K02113', 'K02109', 'K02112', 'K02111', 'K02114'} | M00157 |
| RSZAXPI002330-47_RA_dental.metaspades.bin.66                 | {'K02108', 'K02109', 'K02112', 'K02111', 'K02115', 'K02110', 'K02113'}           | M00157 |
| GCA_947648615.1_SRR15633991_bin.36_metawrap_v1.3_MAG_genomic | {'K15633', 'K00927', 'K01689', 'K01803', 'K00134', 'K00873'}                     | M00002 |
| GCA_947648615.1_SRR15633991_bin.36_metawrap_v1.3_MAG_genomic | {'K00625', 'K00925'}                                                             | M00579 |
| RSZYD18078398_A_saliva.metaspades.bin.15                     | {'K15633', 'K00927', 'K01689', 'K01803', 'K00134', 'K00873'}                     | M00002 |
| RSZYD18187492_A_saliva.metaspades.bin.15                     | {'K15633', 'K00927', 'K01689', 'K01803', 'K00134', 'K00873'}                     | M00002 |
| RSZYD18187492_A_saliva.metaspades.bin.15                     | {'K00625', 'K00925'}                                                             | M00579 |
| RSZYD18078542_A_saliva.metaspades.bin.5                      | {'K01834', 'K00927', 'K01689', 'K01803', 'K00134', 'K00873'}                     | M00002 |
| RSZYD18078542_A_saliva.metaspades.bin.5                      | {'K02108', 'K02115', 'K02110', 'K02113', 'K02109', 'K02112', 'K02111', 'K02114'} | M00157 |
| SZAXPI018173-27_RA_dental.metaspades.bin.20                  | {'K00927', 'K01689', 'K01803', 'K00134', 'K00873'}                               | M00002 |
| SZAXPI018173-27_RA_dental.metaspades.bin.20                  | {'K02108', 'K02115', 'K02110', 'K02113', 'K02109', 'K02112', 'K02111', 'K02114'} | M00157 |



|                                                              |                                                                           |        |
|--------------------------------------------------------------|---------------------------------------------------------------------------|--------|
| R0170300390_saliva_RAH.megahit.bin.85                        | {'K01834','K00927','K01689','K01803','K00134','K00873'}                   | M00002 |
| R0170300390_saliva_RAH.megahit.bin.85                        | {'K02108','K02115','K02110','K02113','K02109','K02112','K02111','K02114'} | M00157 |
| R0170300137_tooth_RA.megahit.bin.43                          | {'K02108','K02115','K02110','K02113','K02109','K02112','K02111','K02114'} | M00157 |
| GCA_017403895.1                                              | {'K15633','K00927','K01689','K01803','K00134','K00873'}                   | M00002 |
| GCA_017403895.1                                              | {'K01897'}                                                                | M00086 |
| SZAXPI018286-123_RA_dental.metaspades.bin.12                 | {'K01834','K01689','K01803','K00134','K00873'}                            | M00002 |
| SZAXPI018286-123_RA_dental.metaspades.bin.12                 | {'K02108','K02115','K02110','K02113','K02109','K02112','K02111','K02114'} | M00157 |
| R0170300185_tooth_RA.megahit.bin.44                          | {'K01834','K00927','K01689','K01803','K00134','K00873'}                   | M00002 |
| GCA_947368805.1_SRR15431190_bin.13_metawrap_v1.3_MAG_genomic | {'K15633','K00927','K01803','K00134','K00873'}                            | M00002 |
| GCA_027492975.1_ASM2749297v1_genomic                         | {'K01834','K00927','K15634','K01689','K01803','K00134','K00873'}          | M00002 |
| GCA_027492975.1_ASM2749297v1_genomic                         | {'K02108','K02115','K02110','K02113','K02109','K02112','K02111','K02114'} | M00157 |
| R0170300239_tooth_RAH.megahit.bin.64                         | {'K15633','K00927','K01689','K01803','K00134','K00873'}                   | M00002 |
| R0170300239_tooth_RAH.megahit.bin.64                         | {'K02108','K02115','K02110','K02113','K02109','K02112','K02111','K02114'} | M00157 |
| GCA_003979185.1_ASM397918v1_genomic                          | {'K15633','K00927','K01689','K01803','K00134','K00873'}                   | M00002 |
| R0170300187_tooth_RA.megahit.bin.41                          | {'K01834','K00927','K01689','K01803','K00134','K00873'}                   | M00002 |
| RSZAXPI002311-20_RAH_dental.metaspades.bin.69                | {'K00927','K01689','K01803','K00134','K00873'}                            | M00002 |
| RSZAXPI002311-20_RAH_dental.metaspades.bin.69                | {'K02108','K02115','K02110','K02113','K02109','K02112','K02111','K02114'} | M00157 |
| GCA_003231925.1_ASM323192v1_genomic                          | {'K00927','K01803','K00134','K00873'}                                     | M00002 |
| GCA_003231925.1_ASM323192v1_genomic                          | {'K02108','K02115','K02110','K02113','K02109','K02112','K02111','K02114'} | M00157 |
| R0170300100_tooth_RA.megahit.bin.14                          | {'K15633','K00927','K01689','K01803','K00134','K00873'}                   | M00002 |
| R0170300100_tooth_RA.megahit.bin.14                          | {'K00625','K00925'}                                                       | M00579 |
| GCA_015257795.3_ASM1525779v3_genomic                         | {'K01834','K00927','K01689','K01803','K00134','K00873'}                   | M00002 |
| R0170300251_tooth_RAH.megahit.bin.7                          | {'K01834','K00927','K01689','K01803','K00134','K00873'}                   | M00002 |
| R0170300251_tooth_RAH.megahit.bin.7                          | {'K02108','K02115','K02110','K02113','K02109','K02112','K02111','K02114'} | M00157 |
| SZAXPI018282-108_RA_dental.metaspades.bin.70                 | {'K01834','K00927','K01689','K01803','K00134','K00873'}                   | M00002 |
| GCA_017432705.1                                              | {'K15633','K00927','K01689','K01803','K00134','K00873'}                   | M00002 |
| GCA_017432705.1                                              | {'K00625','K00925'}                                                       | M00579 |
| SZAXPI018180-36_RA_dental.metaspades.bin.18                  | {'K00927','K01689','K01803','K00134','K00873'}                            | M00002 |
| SZAXPI018180-36_RA_dental.metaspades.bin.18                  | {'K02108','K02115','K02110','K02113','K02109','K02112','K02111','K02114'} | M00157 |
| RSZAXPI002620-35_RA_dental.metaspades.bin.1                  | {'K01834','K00927','K01689','K01803','K00134','K00873'}                   | M00002 |
| RSZAXPI002620-35_RA_dental.metaspades.bin.1                  | {'K02108','K02112','K02111','K02115','K02110','K02114'}                   | M00157 |
| RSZAXPI002311-20_RAH_dental.metaspades.bin.31                | {'K01834','K01689','K00873'}                                              | M00002 |
| GCA_016280905.1_ASM1628090v1_genomic                         | {'K15633','K00927','K01689','K01803','K00134','K00873'}                   | M00002 |
| GCA_016280905.1_ASM1628090v1_genomic                         | {'K01897'}                                                                | M00086 |
| GCA_016280905.1_ASM1628090v1_genomic                         | {'K00625','K00925'}                                                       | M00579 |
| GCA_017407085.1                                              | {'K15633','K00927','K01689','K01803','K00134','K00873'}                   | M00002 |
| GCA_017407085.1                                              | {'K01897'}                                                                | M00086 |
| GCA_017407085.1                                              | {'K00625','K00925'}                                                       | M00579 |
| RSZYD18078245_A_saliva.metaspades.bin.14                     | {'K01834','K00927','K01689','K01803','K00134','K00873'}                   | M00002 |
| RSZYD18078245_A_saliva.metaspades.bin.14                     | {'K02108','K02115','K02110','K02113','K02109','K02112','K02111','K02114'} | M00157 |
| R0170300150_tooth_RA.megahit.bin.56                          | {'K00927','K01689','K01803','K00134','K00873'}                            | M00002 |
| R0170300150_tooth_RA.megahit.bin.56                          | {'K02108','K02115','K02110','K02113','K02109','K02112','K02111','K02114'} | M00157 |
| GCA_946406645.1_SRR12081302_bin.54_metawrap_v1.3_MAG_genomic | {'K00625','K00925'}                                                       | M00579 |
| SZAXPI018096-17_RA_dental.metaspades.bin.34                  | {'K00927','K01689','K01803','K00134','K00873'}                            | M00002 |
| SZAXPI018096-17_RA_dental.metaspades.bin.34                  | {'K02108','K02115','K02110','K02113','K02109','K02112','K02111','K02114'} | M00157 |
| R0170300092_tooth_RA.megahit.bin.51                          | {'K01834','K01689','K01803','K00134','K00873'}                            | M00002 |
| R0170300092_tooth_RA.megahit.bin.51                          | {'K02108','K02115','K02110','K02113','K02109','K02112','K02111','K02114'} | M00157 |
| RSZAXPI002637-96_RA_dental.metaspades.bin.5                  | {'K01834','K00927','K01689','K01803','K00134','K00873'}                   | M00002 |
| RSZAXPI002637-96_RA_dental.metaspades.bin.5                  | {'K02108','K02115','K02110','K02113','K02109','K02112','K02111','K02114'} | M00157 |
| R0170300218_tooth_RA.megahit.bin.65                          | {'K00927','K01689','K01803','K00134','K00873'}                            | M00002 |
| R0170300218_tooth_RA.megahit.bin.65                          | {'K02108','K02115','K02110','K02113','K02109','K02112','K02111','K02114'} | M00157 |
| SRR8114048.metaspades.bin.17                                 | {'K15633','K00927','K01689','K01803','K00134','K00873'}                   | M00002 |
| SRR8114048.metaspades.bin.17                                 | {'K00625','K00925'}                                                       | M00579 |
| GCA_026395405.1_ASM2639540v1_genomic                         | {'K02112','K02111','K02115','K02114'}                                     | M00157 |
| RSZYD18187261_A_saliva.metaspades.bin.68                     | {'K15633','K00927','K01689','K01803','K00134','K00873'}                   | M00002 |
| R0170300269_tooth_RAH.megahit.bin.127                        | {'K15633','K00927','K01689','K01803','K00134','K00873'}                   | M00002 |
| R0170300269_tooth_RAH.megahit.bin.127                        | {'K00625','K00925'}                                                       | M00579 |
| RSZYD18187349_A_saliva.metaspades.bin.40                     | {'K01834','K00927','K01803','K00134','K00873'}                            | M00002 |
| RSZAXPI002326-41_RAH_dental.metaspades.bin.6                 | {'K00927','K01689','K01803','K00134','K00873'}                            | M00002 |
| RSZAXPI002326-41_RAH_dental.metaspades.bin.6                 | {'K02108','K02115','K02110','K02113','K02109','K02112','K02111','K02114'} | M00157 |
| RSZAXPI002633-90_RA_dental.metaspades.bin.24                 | {'K01834','K00927','K01689','K01803','K00134','K00873'}                   | M00002 |
| RSZAXPI002674-21_RA_dental.metaspades.bin.42                 | {'K01834','K00927','K01689','K01803','K00134','K00873'}                   | M00002 |
| RSZAXPI002674-21_RA_dental.metaspades.bin.42                 | {'K02108','K02115','K02110','K02113','K02109','K02112','K02111','K02114'} | M00157 |
| R0170300265_tooth_RAH.megahit.bin.100                        | {'K01834','K01689','K01803','K00134','K00873'}                            | M00002 |
| R0170300265_tooth_RAH.megahit.bin.100                        | {'K02108','K02115','K02110','K02113','K02109','K02112','K02111','K02114'} | M00157 |
| SZAXPI018282-108_RA_dental.metaspades.bin.67                 | {'K15633','K00927','K01689','K01803','K00134','K00873'}                   | M00002 |
| SZAXPI018282-108_RA_dental.metaspades.bin.67                 | {'K00625','K00925'}                                                       | M00579 |
| R0170300309_tooth_RAH.megahit.bin.66                         | {'K00927','K01689','K01803','K00134','K00873'}                            | M00002 |
| R0170300309_tooth_RAH.megahit.bin.66                         | {'K02108','K02115','K02110','K02113','K02109','K02112','K02111','K02114'} | M00157 |
| GCA_016196195.1_ASM1619619v1_genomic                         | {'K02108','K02115','K02110','K02113','K02109','K02112','K02111','K02114'} | M00157 |
| GCA_016196195.1_ASM1619619v1_genomic                         | {'K02298','K02300','K02297','K02299'}                                     | M00417 |
| R0170300162_tooth_RA.megahit.bin.20                          | {'K00927','K01689','K01803','K00134','K00873'}                            | M00002 |
| R0170300162_tooth_RA.megahit.bin.20                          | {'K02108','K02109','K02112','K02111','K02110','K02113','K02114'}          | M00157 |
| R0170300176_tooth_RA.megahit.bin.83                          | {'K01834','K00927','K01689','K01803','K00134','K00873'}                   | M00002 |
| RDPYD18189966_A_saliva.metaspades.bin.40                     | {'K15633','K00927','K01689','K01803','K00134','K00873'}                   | M00002 |
| RDPYD18189966_A_saliva.metaspades.bin.40                     | {'K00625','K00925'}                                                       | M00579 |
| RDPYD18098882_A_saliva.metaspades.bin.1                      | {'K01834','K00927','K01689','K01803','K00134','K00873'}                   | M00002 |
| RDPYD18098882_A_saliva.metaspades.bin.1                      | {'K02108','K02115','K02110','K02113','K02109','K02112','K02111','K02114'} | M00157 |
| R0170300136_tooth_RA.megahit.bin.7                           | {'K00927','K01689','K01803','K00134','K00873'}                            | M00002 |
| R0170300136_tooth_RA.megahit.bin.7                           | {'K02108','K02109','K02112','K02111','K02110','K02113','K02114'}          | M00157 |
| SZAXPI018275-88_RA_dental.metaspades.bin.49                  | {'K00927','K01689','K01803','K00134','K00873'}                            | M00002 |
| SZAXPI018275-88_RA_dental.metaspades.bin.49                  | {'K02108','K02115','K02110','K02113','K02109','K02112','K02111','K02114'} | M00157 |
| R0170300066_tooth_RA.megahit.bin.70                          | {'K00927','K01689','K01803','K00134','K00873'}                            | M00002 |
| R0170300066_tooth_RA.megahit.bin.70                          | {'K02108','K02115','K02110','K02113','K02109','K02112','K02111','K02114'} | M00157 |
| GCA_027351585.1_ASM2735158v1_genomic                         | {'K00927','K15634','K01803','K00134','K00873'}                            | M00002 |
| GCA_027351585.1_ASM2735158v1_genomic                         | {'K02108','K02115','K02110','K02113','K02109','K02112','K02111','K02114'} | M00157 |
| GCA_027351585.1_ASM2735158v1_genomic                         | {'K02298','K02300','K02297','K02299'}                                     | M00417 |
| GCA_001897305.1_ASM189730v1_genomic                          | {'K01834','K00927','K01689','K01803','K00134','K00873'}                   | M00002 |
| GCA_001897305.1_ASM189730v1_genomic                          | {'K02108','K02115','K02110','K02113','K02109','K02112','K02111','K02114'} | M00157 |
| GCA_001897305.1_ASM189730v1_genomic                          | {'K02298','K02300','K02297','K02299'}                                     | M00417 |
| SRR6748158.metaspades.bin.2                                  | {'K01834','K00927','K01689','K01803','K00134','K00873'}                   | M00002 |
| SRR6748158.metaspades.bin.2                                  | {'K02108','K02115','K02110','K02113','K02109','K02112','K02111','K02114'} | M00157 |
| R0170300111_tooth_RA.megahit.bin.62                          | {'K00927','K01689','K01803','K00134','K00873'}                            | M00002 |
| R0170300111_tooth_RA.megahit.bin.62                          | {'K02108','K02115','K02110','K02113','K02109','K02112','K02111','K02114'} | M00157 |
| SZAXPI018171-25_1_RA_dental.metaspades.bin.83                | {'K01834','K00927','K01689','K01803','K00134','K00873'}                   | M00002 |
| GCA_943354725.1_RH-27jun17-331_genomic                       | {'K02108','K02110'}                                                       | M00157 |
| YS000535_saliva.spades.bin.35                                | {'K01834','K00927','K01689','K01803','K00873'}                            | M00002 |
| YS000535_saliva.spades.bin.35                                | {'K02108','K02115','K02110','K02113','K02109','K02112','K02111','K02114'} | M00157 |
| RSZYD18187554_A_saliva.metaspades.bin.21                     | {'K01834','K00927','K01689','K01803','K00134','K00873'}                   | M00002 |
| RSZYD18187554_A_saliva.metaspades.bin.21                     | {'K02108','K02115','K02110','K02113','K02109','K02112','K02111','K02114'} | M00157 |
| YS000254_saliva.spades.bin.23                                | {'K01834','K00927','K01689','K01803','K00134','K00873'}                   | M00002 |
| GCA_002336935.1_ASM233693v1_genomic                          | {'K00927','K01803','K00134','K00873'}                                     | M00002 |
| GCA_002336935.1_ASM233693v1_genomic                          | {'K02108','K02115','K02110','K02113','K02109','K02112','K02111','K02114'} | M00157 |
| GCA_947425855.1_SRR19981115_bin.7_metawrap_v1.3_MAG_genomic  | {'K15633','K01689','K01803','K00134'}                                     | M00002 |
| R0170300114_tooth_RA.megahit.bin.10                          | {'K15633','K00927','K01689','K01803','K00134','K00873'}                   | M00002 |





|                                          |                                                                                  |        |
|------------------------------------------|----------------------------------------------------------------------------------|--------|
| R0170300313_tooth_RAH.megahit.bin.102    | {'K00625', 'K00925'}                                                             | M00579 |
| R0170300273_tooth_RAH.megahit.bin.122    | {'K00927', 'K01689', 'K01803', 'K00134', 'K00873'}                               | M00002 |
| R0170300273_tooth_RAH.megahit.bin.122    | {'K02108', 'K02115', 'K02110', 'K02113', 'K02109', 'K02112', 'K02111', 'K02114'} | M00157 |
| GCA_002323055.1_ASM232305v1_genomic      | {'K02108', 'K02115', 'K02110', 'K02113', 'K02109', 'K02112', 'K02111', 'K02114'} | M00157 |
| RSZYD18187756_A_saliva.metaspades.bin.35 | {'K01834', 'K00927', 'K01689', 'K01803', 'K00134', 'K00873'}                     | M00002 |
| GCA_017432305.1                          | {'K15633', 'K00927', 'K01689', 'K01803', 'K00134', 'K00873'}                     | M00002 |
| GCA_017432305.1                          | {'K00625', 'K00925'}                                                             | M00579 |
| GCA_009778675.1_ASM977867v1_genomic      | {'K01834', 'K00927', 'K01689', 'K01803', 'K00873'}                               | M00002 |
| RSZYD18187115_A_saliva.metaspades.bin.47 | {'K15633', 'K00927', 'K01689', 'K01803', 'K00134', 'K00873'}                     | M00002 |
| RSZYD18187115_A_saliva.metaspades.bin.47 | {'K00625', 'K00925'}                                                             | M00579 |
| RDPYD18189960_A_saliva.metaspades.bin.21 | {'K01834', 'K15633', 'K00927', 'K01689', 'K01803', 'K00134', 'K00873'}           | M00002 |
| RDPYD18189960_A_saliva.metaspades.bin.21 | {'K00625', 'K00925'}                                                             | M00579 |

---



# Supplementary Table 4a. The most prevalent protein clusters unique to Saccharibacteria from five different environments.

| Protein cluster                                            | Isolation source | Prevalence | eggNOG annotation |                |                     | PFAMs                                                  |
|------------------------------------------------------------|------------------|------------|-------------------|----------------|---------------------|--------------------------------------------------------|
|                                                            |                  |            | COG category      | Preferred name | KEGG ko             |                                                        |
| GCA_904425485.1_PRJEB35131-2_00067                         | human body       | 1,135      | ET                | -              | ko:K02029,ko:K02030 | SBP_bac_3                                              |
| RDPYD18098770_A_saliva.metaspades.bin.53_00293             | human body       | 794        | F                 | nudI           | ko:K03574,ko:K12944 | NUDIX                                                  |
| R0170300213_tooth_RA.megahit.bin.30_00506                  | human body       | 766        | S                 | -              | -                   | NT5C                                                   |
| RSZAXPI002604-26_RA_dental.metaspades.bin.36_00026         | human body       | 653        | S                 | -              | -                   | DUF488                                                 |
| R0170300213_tooth_RA.megahit.bin.30_00364                  | human body       | 648        | E                 | -              | ko:K01437           | AstE_AspA                                              |
| R0170300196_tooth_RA.megahit.bin.46_00028                  | human body       | 638        | O                 | -              | -                   | DUF2268                                                |
| SZAXPI018279-94_RA_dental.metaspades.bin.16_00131          | human body       | 627        | K                 | vncR           | -                   | Response_reg,Trans_reg_C                               |
| SZAXPI018171-25_1_RA_dental.metaspades.bin.52_00603        | human body       | 624        | F                 | -              | ko:K05873           | CYTH                                                   |
| RSZAXPI002304-13_RAH_dental.metaspades.bin.45_00844        | human body       | 623        | E                 | hutG           | ko:K01479           | FGase                                                  |
| SZAXPI018292-158_RA_dental.metaspades.bin.12_00103         | human body       | 609        | S                 | yagB           | ko:K06950           | HD                                                     |
| R0170300055_tooth_RA.megahit.bin.5_00442                   | human body       | 583        | F                 | hpt            | ko:K00760,ko:K15780 | Pribosyltran                                           |
| RSZYD18187612_A_saliva.metaspades.bin.12_00012             | human body       | 559        | S                 | -              | -                   | DUF4918                                                |
| RSZAXPI002604-26_RA_dental.metaspades.bin.30_00309         | human body       | 554        | S                 | -              | -                   | APH                                                    |
| R0170300106_tooth_RA.megahit.bin.44_00558                  | human body       | 551        | M                 | -              | -                   | DUF3152                                                |
| RDPYD18189959_A_saliva.metaspades.bin.31_00033             | human body       | 542        | S                 | -              | -                   | MN3_slv                                                |
| SZAXPI011699-166_RA_dental.metaspades.bin.36_00100         | human body       | 541        | KT                | -              | ko:K03973           | DUF2807,PspC                                           |
| RSZYD18078217_A_saliva.metaspades.bin.41_00313             | human body       | 537        | S                 | speE           | ko:K00797           | Spermine_synth                                         |
| R0170300156_tooth_RA.megahit.bin.76_00550                  | human body       | 523        | S                 | yagB           | ko:K06950           | HD                                                     |
| GCA_022819385.1_ASM2281938v1_00372                         | human body       | 517        | T                 | -              | -                   | CHASE3,GAF_2,HAMP,HATPase_c,HisKA,NIT,Response_reg     |
| R0170300260_tooth_RAH.megahit.bin.16_00185                 | human body       | 516        | M                 | -              | -                   | Beta_helix,CUB,CaIb-beta,DUF11,PA14,SdrD_B,VWA_2       |
| GCA_946893605.1_PRJEB56001_00510                           | human body       | 513        | G                 | -              | ko:K00615           | Transket_pyr,Transketolase_C                           |
| RSZYD18187735_A_saliva.metaspades.bin.54_00214             | human body       | 511        | S                 | -              | -                   | -                                                      |
| GCA_010202845.1_ASM1020284v1_00206                         | human body       | 510        | H                 | idsA           | ko:K02523,ko:K13787 | polyprenyl_synt                                        |
| GCA_010202465.1_ASM1020246v1_00375                         | human body       | 509        | C                 | atpF           | ko:K02109           | ATP-synt_B                                             |
| RSZAXPI002636-95_RA_dental.metaspades.bin.22_00368         | human body       | 508        | H                 | dnaX           | ko:K02343           | DNA_pol3_delta2,DNA_pol3_gamma3                        |
| SZAXPI018309-166_RA_dental.metaspades.bin.21_00261         | human body       | 507        | T                 | torS           | -                   | CHASE3,HATPase_c,HisKA,Response_reg                    |
| SZAXPI018280-95_RA_dental.metaspades.bin.36_00756          | human body       | 506        | F                 | ntpA           | ko:K02428           | Ham1p_like                                             |
| YS000066_saliva.spades.bin.24_00054                        | human body       | 503        | D                 | -              | -                   | -                                                      |
| GCA_905372305.1_SRR9217408-mag-bin.12_00531                | human body       | 502        | S                 | -              | -                   | Abhydrolase_6                                          |
| RSZYD18187244_A_saliva.metaspades.bin.38_00616             | human body       | 495        | S                 | yabE           | -                   | 3D,DUF348,G5                                           |
| RSZYD18187203_A_saliva.metaspades.bin.7_00476              | human body       | 491        | G                 | MA20_23410     | ko:K01187           | Alpha-amylase,DUF3459                                  |
| RSZYD18187306_A_saliva.metaspades.bin.13_00359             | human body       | 487        | F                 | rph            | ko:K00989,ko:K02428 | Ham1p_like,RNase_PH,RNase_PH_C                         |
| RSZYD18187848_A_saliva.metaspades.bin.3_00109              | human body       | 487        | O                 | -              | -                   | Thioredoxin_4                                          |
| R0170300236_tooth_RAH.megahit.bin.77_00517                 | human body       | 485        | M                 | -              | -                   | Glyco_transf_4,Glycos_transf_1                         |
| RSZYD18187123_A_saliva.metaspades.bin.13_00263             | human body       | 485        | S                 | -              | -                   | DUF4384,PEGA                                           |
| SZAXPI011699-166_RA_dental.metaspades.bin.36_00775         | human body       | 484        | J                 | ywC            | ko:K07566           | Sua5_yciO_yrDC                                         |
| R0170300157_tooth_RA.megahit.bin.55_00145                  | human body       | 480        | U                 | secE           | ko:K03073           | SecE                                                   |
| RSZAXPI002637-96_RA_dental.metaspades.bin.23_00650         | human body       | 479        | V                 | -              | ko:K02004           | FtsX,MacB_PCD                                          |
| RSZAXPI002620-35_RA_dental.metaspades.bin.1_00362          | human body       | 477        | S                 | -              | -                   | AAA_33                                                 |
| RSZYD18078571_A_saliva.metaspades.bin.52_00009             | human body       | 477        | U                 | lepB           | ko:K03100           | Peptidase_S24                                          |
| GCA_905372305.1_SRR9217408-mag-bin.12_00563                | human body       | 473        | T                 | vicK           | ko:K07652           | HAMP,HATPase_c,HisKA,PAS,PAS_9                         |
| RSZAXPI002620-35_RA_dental.metaspades.bin.1_00365          | human body       | 473        | L                 | hoIB           | ko:K02341           | DNA_pol3_delta2,DNApol3-delta_C                        |
| GCA_946893605.1_PRJEB56001_00237                           | human body       | 470        | S                 | -              | -                   | DUF1980                                                |
| RSZYD18078781_A_saliva.metaspades.bin.11_00563             | human body       | 459        | M                 | -              | ko:K07284           | Sortase                                                |
| SZAXPI011699-166_RA_dental.metaspades.bin.36_00264         | human body       | 457        | S                 | mltG           | ko:K07082           | YceG                                                   |
| RDPYD18189889_A_saliva.metaspades.bin.54_00552             | human body       | 453        | F                 | purC           | ko:K01923           | SAICAR_synth                                           |
| RDPYD18098882_A_saliva.metaspades.bin.1_00377              | human body       | 451        | N                 | nucH           | ko:K07004           | Collagen,Exo_endo_phos,LTD,Rib                         |
| RSZYD18078245_A_saliva.metaspades.bin.14_00292             | human body       | 451        | S                 | dhh            | ko:K06881           | DHH,DHHA1                                              |
| YS000142_saliva.spades.bin.13_00572                        | human body       | 449        | -                 | -              | -                   | -                                                      |
| RSZYD18187540_A_saliva.metaspades.bin.35_00440             | human body       | 442        | E                 | -              | -                   | AdoMet_dc                                              |
| RSZYD18187676_A_saliva.metaspades.bin.32_00409             | human body       | 441        | S                 | -              | -                   | PMT_2                                                  |
| SZAXPI018278-93_RA_dental.metaspades.bin.41_00623          | human body       | 441        | O                 | -              | -                   | Trypsin_2                                              |
| RSZYD18187169_A_saliva.metaspades.bin.33_00029             | human body       | 438        | K                 | -              | ko:K09825           | FUR                                                    |
| RDPYD18300081_A_saliva.metaspades.bin.39_00227             | human body       | 434        | T                 | -              | -                   | HAMP,HATPase_c,HisKA                                   |
| GCA_947098845.1_SRR8786267_bin.6_metaWRAP_v1.3_MAG_00053   | human body       | 431        | T                 | -              | -                   | HATPase_c,HisKA                                        |
| YS000373_saliva.spades.bin.23_00532                        | human body       | 431        | NU                | -              | -                   | N_methyl                                               |
| GCA_007845355.1_ASM784535v1_00397                          | human body       | 430        | J                 | fmt            | ko:K00604           | Formyl_trans_c,Formyl_trans_N                          |
| GCA_905370345.1_DRR046104-mag-bin.8_00418                  | human body       | 429        | NU                | pieE           | ko:K02655           | CompD_DUS_N_methyl                                     |
| SZAXPI018174-30_RA_dental.metaspades.bin.36_00804          | human body       | 426        | K                 | -              | -                   | -                                                      |
| RSZYD18187762_A_saliva.metaspades.bin.45_00785             | human body       | 419        | M                 | -              | ko:K22409           | LyIR_cpsA_psr                                          |
| YS000025_saliva.spades.bin.20_00630                        | human body       | 419        | O                 | -              | -                   | CHAP_LysM                                              |
| YS000546_saliva.spades.bin.3_00620                         | human body       | 419        | S                 | -              | -                   | Radical_SAM                                            |
| RSZAXPI002326-41_RAH_dental.metaspades.bin.24_00048        | human body       | 418        | -                 | -              | -                   | CARDB,CBM_6,NosD,PKD,PQQ_3                             |
| GCA_017437945.1_00778                                      | other mammals    | 95         | C                 | -              | ko:K07138           | DUF362                                                 |
| GCA_017432225.1_00074                                      | other mammals    | 83         | E                 | aguD           | ko:K02065           | AA_permease_2                                          |
| GCA_947362105.1_SRR15194760_bin.16_metaWRAP_v1.3_MAG_00193 | other mammals    | 83         | K                 | -              | -                   | HTH_3,Zn_ribbon_2                                      |
| GCA_017506895.1_00192                                      | other mammals    | 80         | O                 | -              | -                   | Thioredoxin_4                                          |
| GCA_017515265.1_ASM1751526v1_00173                         | other mammals    | 78         | P                 | corC           | ko:K06189           | CBS,CorC_HlyC                                          |
| GCA_017460165.1_00101                                      | other mammals    | 76         | E                 | -              | ko:K02035           | SBP_bac_5                                              |
| GCA_947425855.1_SRR19081115_bin.7_metaWRAP_v1.3_MAG_00362  | other mammals    | 74         | -                 | -              | -                   | RVT_1                                                  |
| GCA_947425855.1_SRR19081115_bin.7_metaWRAP_v1.3_MAG_00377  | other mammals    | 72         | S                 | -              | -                   | ABC_tran,ABC_tran_Xtn                                  |
| GCA_017515265.1_ASM1751526v1_00449                         | other mammals    | 71         | M                 | -              | -                   | Sortase                                                |
| GCA_017515265.1_ASM1751526v1_00343                         | other mammals    | 70         | U                 | glpF           | ko:K02440,ko:K06188 | MIP                                                    |
| GCA_946626365.1_SRR873609_bin.132_metaWRAP_v1.3_MAG_00268  | other mammals    | 70         | FJ                | -              | -                   | DUF1653                                                |
| GCA_946626365.1_SRR873609_bin.132_metaWRAP_v1.3_MAG_00402  | other mammals    | 70         | S                 | -              | ko:K01183           | CHU_C,CaIb-beta,DUF5011,Glyco_hydro_18,LRR_5,PKD,TSP_3 |
| GCA_946618085.1_SRR873610_bin.1_metaWRAP_v1.3_MAG_00370    | other mammals    | 69         | H                 | folA           | ko:K00287           | DHFR_1                                                 |
| GCA_017431085.1_00117                                      | other mammals    | 68         | S                 | p40            | ko:K21471           | CHAP                                                   |
| GCA_017510425.1_00221                                      | other mammals    | 68         | P                 | alf1           | ko:K01623           | Glycolytic                                             |
| GCA_017651125.1_ASM1765112v1_00497                         | other mammals    | 65         | P                 | -              | ko:K21993           | Form_Nir_trans                                         |
| GCA_946409605.1_SRR12081300_bin.39_metaWRAP_v1.3_MAG_00741 | other mammals    | 64         | GK                | -              | ko:K00845           | ROK                                                    |
| GCA_947388865.1_SRR15214599_bin.4_metaWRAP_v1.3_MAG_00655  | other mammals    | 62         | V                 | safA           | -                   | CAP,LysM                                               |
| GCA_017432365.1_00672                                      | other mammals    | 60         | M                 | -              | -                   | Rmid_sub_bind                                          |
| GCA_947302355.1_SRR10912539_bin.48_metaWRAP_v1.3_MAG_00046 | other mammals    | 60         | O                 | -              | ko:K07033           | UPF0051                                                |
| GCA_017510075.1_00449                                      | other mammals    | 59         | V                 | -              | ko:K06147,ko:K12531 | ABC_membrane,ABC_tran                                  |
| GCA_947429355.1_SRR19981115_bin.23_metaWRAP_v1.3_MAG_00367 | other mammals    | 59         | V                 | skfE           | ko:K01990           | ABC_tran                                               |
| GCA_947428935.1_SRR19981124_bin.14_metaWRAP_v1.3_MAG_00924 | other mammals    | 58         | S                 | recX           | ko:K03565           | RecX                                                   |
| GCA_017510075.1_00430                                      | other mammals    | 57         | U                 | secE           | ko:K03073           | SecE                                                   |
| GCA_017651125.1_ASM1765112v1_00490                         | other mammals    | 54         | S                 | -              | -                   | DUF308                                                 |
| GCA_017515785.1_ASM1751578v1_00364                         | other mammals    | 53         | P                 | -              | -                   | VTC                                                    |
| GCA_017432225.1_00133                                      | other mammals    | 52         | S                 | -              | -                   | Cthe_2159                                              |
| GCA_947364965.1_SRR16350202_bin.8_metaWRAP_v1.3_MAG_00450  | other mammals    | 52         | P                 | -              | ko:K01537           | Cation_ATPase_C,Cation_ATPase_N,E1-E2_ATPase,Hydrolase |
| GCA_947068245.1_SRR12358625_bin.21_metaWRAP_v1.3_MAG_00001 | other mammals    | 50         | O                 | -              | -                   | Zn_protease                                            |
| GCA_947428935.1_SRR19981124_bin.14_metaWRAP_v1.3_MAG_00638 | other mammals    | 50         | S                 | -              | -                   | SNARE_assoc                                            |
| GCA_947428935.1_SRR19981124_bin.14_metaWRAP_v1.3_MAG_00978 | other mammals    | 49         | L                 | pcrA           | ko:K03657           | UvrD-helicase,UvrD_C                                   |
| GCA_947087275.1_SRR14038240_bin.4_metaWRAP_v1.3_MAG_00590  | other mammals    | 48         | T                 | -              | -                   | EAL,GGDEF,Response_reg                                 |
| GCA_947426085.1_SRR18439536_bin.4_metaWRAP_v1.3_MAG_00172  | other mammals    | 48         | S                 | -              | -                   | Putative_PNOx                                          |
| GCA_017511965.1_00274                                      | other mammals    | 47         | F                 | ackA           | ko:K00925           | Acetate_kinase                                         |
| GCA_017515265.1_ASM1751526v1_00507                         | other mammals    | 47         | T                 | phoR           | ko:K07636           | HAMP,HATPase_c,HisKA,PAS,PAS_4,PAS_8,sCache_like       |
| GCA_017510925.1_00618                                      | other mammals    | 45         | S                 | yabE           | -                   | 3D,DUF348,G5                                           |
| GCA_017431745.1_00100                                      | other mammals    | 44         | -                 | -              | -                   | zinc_ribbon_2                                          |
| GCA_017460225.1_00520                                      | other mammals    | 44         | C                 | -              | -                   | Pyr_redox_2,Pyr_redox_dim                              |
| GCA_947165975.1_SRR8387714_bin.97_metaWRAP_v1.3_MAG_00006  | other mammals    | 44         | S                 | mltG           | ko:K07082           | YceG                                                   |
| GCA_947368805.1_SRR15431190_bin.13_metaWRAP_v1.3_MAG_00389 | other mammals    | 44         | P                 | czcD           | ko:K16264           | Cation_efflux,ZT_dimer                                 |
| GCA_017513905.1_00236                                      | other mammals    | 43         | O                 | -              | ko:K03805,ko:K03981 | DSBA                                                   |
| GCA_947569885.1_SRR15604579_bin.36_metaWRAP_v1.3_MAG_00489 | other mammals    | 43         | S                 | -              | -                   | TRAM                                                   |
| GCA_002371895.1_ASM237189v1_00610                          | other mammals    | 42         | V                 | -              | ko:K02003           | ABC_tran                                               |
| GCA_017460225.1_00539                                      | other mammals    | 42         | O                 | -              | ko:K03805,ko:K03981 | DSBA                                                   |
| GCA_017510425.1_00479                                      | other mammals    | 42         | V                 | -              | ko:K02003,ko:K02004 | ABC_tran,FtsX                                          |
| GCA_017404515.1_00131                                      | other mammals    | 41         | J                 | ksgA           | ko:K02528           | RnaAD                                                  |
| GCA_017430785.1_00375                                      | other mammals    | 41         | F                 | -              | -                   | NUDIX                                                  |
| GCA_017480095.1_00223                                      | other mammals    | 41         | M                 | -              | ko:K07258           | Peptidase_S11                                          |
| GCA_947385605.1_ERR6760111_bin.57_metaWRAP_v1.3_MAG_00301  | other mammals    | 41         | S                 | -              | -                   | Abhydrolase_6                                          |
| GCA_017421325.1_00754                                      | other mammals    | 40         | M                 | muriI          | ko:K01776           | Asp_Glu_race                                           |
| GCA_017480095.1_00533                                      | other mammals    | 40         | M                 | -              | -                   | Glyco_trans_1_4,Glyco_transf_4,Glycos_transf_1         |
| GCA_947059195.1_ERR9465699_bin.49_metaWRAP_v1.3_MAG_00381  | other mammals    | 40         | G                 | -              | ko:K01623           | Glycolytic                                             |
| GCA_947364965.1_SRR16350202_bin.8_metaWRAP_v1.3_MAG_00108  | other mammals    | 40         | E                 | pepN           | ko:K01256           | ERAP1_C,Peptidase_M1                                   |
| GCA_947388495.1_SRR15214593_bin.20_metaWRAP_v1.3_MAG_00309 | other mammals    | 40         | C                 | glcD           | ko:K00104           | CCG,FAD-oxidase_C,FAD_binding_4,Fer4_17,Fer4_8         |
| GCA_947425245.1_SRR19981124_bin.25_metaWRAP_v1.3_MAG_00589 | other mammals    | 40         | S                 | -              | -                   | DUF308                                                 |
| GCA_947569885.1_SRR15604579_bin.36_metaWRAP_v1.3_MAG_00488 | other mammals    | 40         | L                 | -              | ko:K03502           | IMS,IMS_C,IMS_HHH                                      |
| GCA_017404845.1_00097                                      | other mammals    | 39         | M                 | spvD           | ko:K03587,ko:K08384 | PASTA,PBP_dimer,Transpeptidase                         |
| GCA_017515285.1_ASM1751528v1_00728                         | other mammals    | 39         | I                 | -              | -                   | DUF2974,LTD,Lipase_3                                   |
| GCA_017619315.1_ASM1761931v1_00749                         | other mammals    | 39         | V                 | -              | ko:K01990           | ABC_tran                                               |
| GCA_016286785.1_ASM1628678v1_00016                         | other mammals    | 38         | M                 | -              | -                   | -                                                      |
| GCA_017404725.1_00239                                      | other mammals    | 38         | J                 | rpIW           | ko:K02892           | Ribosomal_L23                                          |
| GCA_017511845.1_00017                                      | other mammals    | 38         | G                 | xynD           | ko:K22278           | Polysacc_deac_1                                        |
| GCA_017511925.1_00198                                      | other mammals    | 38         | FJ                | -              | ko:K01487           | dCMP_cyt_deam_1                                        |
| GCA_945872155.1_SRR15732359_bin.8_metaWRAP_v1.3_MAG_00313  | other mammals    | 38         | L                 | rhbB           | ko:K03470           | RNase_HII                                              |
| GCA_947425995.1_SRR19981123_bin.1_metaWRAP_v1.3_MAG_00676  | other mammals    | 38         | IQ                | baiA           | ko:K00059,ko:K00076 | adh_short,adh_short_C2                                 |
| GCA_017406905.1_00512</                                    |                  |            |                   |                |                     |                                                        |



|                                                                  |            |    |     |       |                               |                                                                          |
|------------------------------------------------------------------|------------|----|-----|-------|-------------------------------|--------------------------------------------------------------------------|
| GCA_009777315.1_ASM977731v1_00448                                | insects    | 7  | P   | mgfA  | ko:K01531                     | Cation_ATPase,Cation_ATPase_C,Cation_ATPase_N,E1-E2_ATPase,Hydrolase     |
| GCA_009785095.1_ASM978509v1_00217                                | insects    | 5  | S   | -     | -                             | -                                                                        |
| GCA_009776375.1_ASM977637v1_00135                                | insects    | 4  | J   | trnB  | ko:K03439                     | Methyltransf_4                                                           |
| GCA_009776375.1_ASM977637v1_00722                                | insects    | 4  | T   | -     | -                             | CHASE,HAMP,HATPase_c,HisKA,Hpt,PAS,PAS_3,PAS_9,Peripla_BP_6,Response_reg |
| GCA_009778675.1_ASM977867v1_00025                                | insects    | 4  | S   | -     | -                             | DUF2154                                                                  |
| GCA_009781895.1_ASM978189v1_00590                                | insects    | 4  | F   | pyrH  | ko:K09903                     | AA_kinase                                                                |
| GCA_009783235.1_ASM978323v1_00508                                | insects    | 4  | M   | -     | -                             | Glycos_transf_2                                                          |
| GCA_009783305.1_ASM978330v1_00104                                | insects    | 4  | U   | -     | ko:K09125                     | Vut_1                                                                    |
| GCA_009785095.1_ASM978509v1_00106                                | insects    | 4  | U   | -     | ko:K09125                     | Vut_1                                                                    |
| GCA_009785095.1_ASM978509v1_00133                                | insects    | 4  | H   | folA  | ko:K00287                     | 2TM,DHFR_1                                                               |
| GCA_009785095.1_ASM978509v1_00323                                | insects    | 4  | D   | tiis  | ko:K04075,ko:K15780           | ATP_bind_3,Tiis,Tiis_C                                                   |
| GCA_009785095.1_ASM978509v1_00440                                | insects    | 4  | M   | -     | ko:K00075                     | FAD_binding_4,MurB_C                                                     |
| GCA_009785095.1_ASM978509v1_00690                                | insects    | 4  | M   | -     | ko:K07282                     | PGA_cap                                                                  |
| GCA_009787015.1_ASM978701v1_00434                                | insects    | 4  | I   | plsC2 | ko:K00655                     | Acyltransferase                                                          |
| GCA_009787015.1_ASM978701v1_00443                                | insects    | 4  | L   | holB  | ko:K02341                     | DNA_pol3_delta2,DNApol3-delta_C                                          |
| GCA_009787015.1_ASM978701v1_00626                                | insects    | 4  | L   | dnaX  | ko:K02343                     | DNA_pol3_delta2,DNA_pol3_gamma3                                          |
| GCA_009787245.1_ASM978724v1_00043                                | insects    | 4  | M   | murF  | ko:K01929                     | Mur_ligase,Mur_ligase_C,Mur_ligase_M                                     |
| GCA_009787245.1_ASM978724v1_00200                                | insects    | 4  | U   | secE  | ko:K03073                     | SecE                                                                     |
| GCA_009787245.1_ASM978724v1_00710                                | insects    | 4  | F   | -     | -                             | ATP-cone                                                                 |
| GCA_903918245.1_freshwater_MAG_---_AM-lipid-01-D1_bin-099_00459  | natural    | 23 | S   | -     | -                             | Aldo_ket_red                                                             |
| GCA_903821315.1_freshwater_MAG_---_AM-lipid-01-D2_bin-004_00090  | natural    | 16 | GM  | -     | -                             | DUF2867,NAD_binding_10                                                   |
| GCA_016196105.1_ASM1619610v1_00783                               | natural    | 15 | U   | sipV  | ko:K03100                     | Peptidase_S24                                                            |
| GCA_903877025.1_freshwater_MAG_---_AlinenLipids_bin-2261_00468   | natural    | 15 | L   | -     | -                             | SOUL                                                                     |
| GCA_946482285.1_SRR14536431_bin.16_metawrap_v1.3.0_MAG_00662     | natural    | 15 | P   | fur   | ko:K03711                     | FUR                                                                      |
| GCA_946482575.1_SRR14536435_bin.26_metawrap_v1.3.0_MAG_00250     | natural    | 15 | V   | -     | -                             | CHAP                                                                     |
| GCA_001790525.1_ASM179052v1_00500                                | natural    | 14 | K   | -     | -                             | Cupin_2,HTH_3,HTH_31                                                     |
| GCA_002952755.1_ASM295275v1_01307                                | natural    | 14 | M   | murG  | ko:K02563                     | Glyco_tran_28_C,Glyco_transf_28                                          |
| GCA_007127855.1_ASM712785v1_00793                                | natural    | 14 | T   | resE  | ko:K07651                     | HAMP,HATPase_c,HisKA,PAS,PAS_4                                           |
| GCA_014377525.1_ASM1437752v1_00014                               | natural    | 14 | H   | -     | -                             | Methyltransf_11                                                          |
| GCA_025924835.1_ASM2592483v1_00777                               | natural    | 14 | H   | cyoE  | ko:K02257                     | UbiA                                                                     |
| GCA_903839435.1_freshwater_MAG_---_Kiruna_bin-08663_00347        | natural    | 14 | U   | lepB  | ko:K03100                     | Peptidase_S24                                                            |
| GCA_943353165.1_RH-20apr16-349_00201                             | natural    | 14 | U   | -     | ko:K03116                     | Mta_Hcf106                                                               |
| GCA_946478715.1_SRR10754055_bin.5_metawrap_v1.3.0_MAG_00118      | natural    | 14 | S   | -     | -                             | DUF2127                                                                  |
| GCA_001790625.1_ASM179062v1_00547                                | natural    | 13 | T   | -     | -                             | HATPase_c,HTH_18,HisKA,Reg_prop,Response_reg,Y_Y_Y                       |
| GCA_016196195.1_ASM1619619v1_00575                               | natural    | 13 | M   | cfa   | ko:K00574,ko:K20238           | CMAS                                                                     |
| GCA_946478715.1_SRR10754055_bin.5_metawrap_v1.3.0_MAG_00010      | natural    | 13 | S   | ytxH  | -                             | YtxH                                                                     |
| GCA_002381485.1_ASM238148v1_00691                                | natural    | 12 | M   | -     | ko:K22409                     | CHAP,LysM                                                                |
| GCA_002405335.1_ASM240533v1_01162                                | natural    | 12 | J   | pheT  | ko:K01890                     | B3_4,B5,FDX-ACB,IRNA_bind                                                |
| GCA_002429245.1_ASM242924v1_00914                                | natural    | 12 | NU  | -     | -                             | N_methyl_SBP_bac_10                                                      |
| GCA_002452155.1_ASM245215v1_00590                                | natural    | 12 | NU  | piIM  | ko:K02662                     | PiIM_2                                                                   |
| GCA_016187125.1_ASM1618712v1_00074                               | natural    | 12 | P   | -     | ko:K02004                     | FtsX,MacB_PCD                                                            |
| GCA_016187175.1_ASM1618717v1_00397                               | natural    | 12 | P   | macB  | ko:K02003                     | ABC_tran                                                                 |
| GCA_016234585.1_ASM1623458v1_00032                               | natural    | 12 | J   | gatC  | ko:K02435                     | Glu-tRNA_Gln                                                             |
| GCA_019662065.1_ASM1966206v1_00418                               | natural    | 12 | G   | -     | ko:K02440                     | MIP                                                                      |
| GCA_903829335.1_freshwater_MAG_---_AM-lipid-02-D1_bin-0304_00156 | natural    | 12 | M   | alr   | ko:K01775                     | Ala_racemase_C,Ala_racemase_N                                            |
| GCA_903839435.1_freshwater_MAG_---_Kiruna_bin-08663_00401        | natural    | 12 | J   | -     | -                             | MTS,MTS_N                                                                |
| GCA_903925195.1_freshwater_MAG_---_YR_bin-4708_00843             | natural    | 12 | T   | -     | -                             | MMPL                                                                     |
| GCA_943354985.1_Jr-19feb18-57_00210                              | natural    | 12 | S   | -     | -                             | -                                                                        |
| GCA_946478715.1_SRR10754055_bin.5_metawrap_v1.3.0_MAG_00188      | natural    | 12 | S   | recX  | ko:K03565                     | RecX                                                                     |
| GCA_001790455.1_ASM179045v1_00131                                | natural    | 11 | S   | recX  | ko:K03565                     | RecX                                                                     |
| GCA_001790455.1_ASM179045v1_00327                                | natural    | 11 | E   | -     | -                             | Glyoxalase                                                               |
| GCA_001790525.1_ASM179052v1_00835                                | natural    | 11 | NOU | piID  | ko:K02654                     | Dis_P_Dis,Peptidase_A24                                                  |
| GCA_014377525.1_ASM1437752v1_00393                               | natural    | 11 | M   | -     | ko:K22044                     | MS_channel                                                               |
| GCA_016183515.1_ASM1618351v1_00637                               | natural    | 11 | C   | glpC  | ko:K00113                     | CCG,Fer4_8                                                               |
| GCA_016187125.1_ASM1618712v1_00513                               | natural    | 11 | S   | -     | -                             | VIT1                                                                     |
| GCA_903840315.1_freshwater_MAG_---_AM-lipid-02-D2_bin-0413_00084 | natural    | 11 | C   | atpD  | ko:K02112                     | ATP-synt_ab,ATP-synt_ab_N                                                |
| GCA_001788565.1_ASM178856v1_00335                                | natural    | 10 | C   | -     | ko:K02109                     | ATP-synt_B                                                               |
| GCA_001788565.1_ASM178856v1_00342                                | natural    | 10 | P   | -     | -                             | Ion_trans_2                                                              |
| GCA_001788565.1_ASM178856v1_00433                                | natural    | 10 | H   | -     | -                             | -                                                                        |
| GCA_001788565.1_ASM178856v1_00708                                | natural    | 10 | L   | dprA  | ko:K04096                     | DNA_processg_A                                                           |
| GCA_001790435.1_ASM179043v1_00879                                | natural    | 10 | M   | -     | ko:K20444                     | Glyco_trans_1_4,Glyco_transf_4                                           |
| GCA_001790525.1_ASM179052v1_00120                                | natural    | 10 | P   | -     | -                             | Na_H_Exchange,TrkA_N                                                     |
| GCA_001790525.1_ASM179052v1_00714                                | natural    | 10 | NU  | piIV  | ko:K02458,ko:K02671           | N_methyl                                                                 |
| GCA_002381545.1_ASM238154v1_00619                                | natural    | 10 | -   | -     | -                             | -                                                                        |
| GCA_002404125.1_ASM240412v1_00671                                | natural    | 10 | S   | -     | ko:K21600                     | Trns_repr_metal                                                          |
| GCA_016178135.1_ASM1617813v1_00248                               | natural    | 10 | O   | -     | -                             | UbiA                                                                     |
| GCA_016187175.1_ASM1618717v1_00374                               | natural    | 10 | S   | comE  | ko:K02238                     | Competence,DUF4131                                                       |
| GCA_025449905.1_ASM2544990v1_00131                               | natural    | 10 | J   | pheT  | ko:K01890                     | B3_4,B5,FDX-ACB,IRNA_bind                                                |
| GCA_903829335.1_freshwater_MAG_---_AM-lipid-02-D1_bin-0304_00740 | natural    | 10 | M   | -     | -                             | Sortase                                                                  |
| GCA_903831735.1_freshwater_MAG_---_AlinenLipids_bin-2074_00629   | natural    | 10 | T   | -     | ko:K03406                     | MCPsignal                                                                |
| GCA_903831735.1_freshwater_MAG_---_AlinenLipids_bin-2074_00630   | natural    | 10 | NT  | -     | ko:K03408                     | CheW                                                                     |
| GCA_903831735.1_freshwater_MAG_---_AlinenLipids_bin-2074_00631   | natural    | 10 | T   | cheY  | ko:K03413                     | Response_reg                                                             |
| GCA_903831735.1_freshwater_MAG_---_AlinenLipids_bin-2074_00632   | natural    | 10 | NT  | cheB  | ko:K03412                     | CheB_methylst,Response_reg                                               |
| GCA_903831735.1_freshwater_MAG_---_AlinenLipids_bin-2074_00634   | natural    | 10 | NT  | cheC  | ko:K03410                     | CheC,CheX                                                                |
| GCA_903831735.1_freshwater_MAG_---_AlinenLipids_bin-2074_00635   | natural    | 10 | NT  | cheD  | ko:K03411                     | CheD                                                                     |
| GCA_903839435.1_freshwater_MAG_---_Kiruna_bin-08663_00302        | natural    | 10 | S   | recX  | ko:K03565                     | RecX                                                                     |
| GCA_903839435.1_freshwater_MAG_---_Kiruna_bin-08663_00341        | natural    | 10 | T   | ciaH  | ko:K14982                     | HATPase_c,HisKA                                                          |
| GCA_903840315.1_freshwater_MAG_---_AM-lipid-02-D2_bin-0413_00181 | natural    | 10 | M   | mscL  | ko:K03282                     | MscL                                                                     |
| GCA_903859325.1_freshwater_MAG_---_AM-lipid-02-D3_bin-0230_00810 | natural    | 10 | I   | sec59 | ko:K18678                     | DUF92                                                                    |
| GCA_903859365.1_freshwater_MAG_---_AM-lipid-02-D3_bin-0353_00567 | natural    | 10 | K   | lytR  | -                             | LytR_C,LytR_cpsA_psr                                                     |
| GCA_903877025.1_freshwater_MAG_---_AlinenLipids_bin-2261_00069   | natural    | 10 | H   | coaE  | -                             | AAA_17                                                                   |
| GCA_903877025.1_freshwater_MAG_---_AlinenLipids_bin-2261_00275   | natural    | 10 | O   | papA  | ko:K13571                     | Pup_ligase                                                               |
| GCA_903877025.1_freshwater_MAG_---_AlinenLipids_bin-2261_00866   | natural    | 10 | G   | pgl   | ko:K01057                     | Glucosamine_ito                                                          |
| GCA_903877025.1_freshwater_MAG_---_AlinenLipids_bin-2261_00921   | natural    | 10 | D   | tiis  | ko:K04075                     | ATP_bind_3,Tiis,Tiis_C                                                   |
| GCA_903883035.1_freshwater_MAG_---_Umea_bin-05361_00043          | natural    | 10 | V   | -     | ko:K02004                     | FtsX,MacB_PCD                                                            |
| GCA_903883035.1_freshwater_MAG_---_Umea_bin-05361_00045          | natural    | 10 | O   | -     | -                             | Colicin_V,Trypsin_2                                                      |
| GCA_903883035.1_freshwater_MAG_---_Umea_bin-05361_00245          | natural    | 10 | S   | -     | ko:K01992                     | ABC2_membrane_2                                                          |
| GCA_903883035.1_freshwater_MAG_---_Umea_bin-05361_00285          | natural    | 10 | C   | -     | -                             | FAD_binding_8,Ferroc_reduct,NAD_binding_1                                |
| GCA_903883035.1_freshwater_MAG_---_Umea_bin-05361_00413          | natural    | 10 | S   | cbzZp | ko:K01091                     | HAD_2                                                                    |
| GCA_903883035.1_freshwater_MAG_---_Umea_bin-05361_00428          | natural    | 10 | M   | mprF  | ko:K07027,ko:K14205           | DUF2156,LPG_synthase_TM                                                  |
| GCA_903883035.1_freshwater_MAG_---_Umea_bin-05361_00674          | natural    | 10 | M   | -     | ko:K19002                     | Glyco_transf_4,Glycos_transf_1,RecX                                      |
| GCA_903883035.1_freshwater_MAG_---_Umea_bin-05361_00772          | natural    | 10 | S   | yhaH  | -                             | YxhH                                                                     |
| GCA_903883035.1_freshwater_MAG_---_Umea_bin-05361_00823          | natural    | 10 | G   | nmrD  | ko:K17758,ko:K17759           | Carb_kinase,YjeF_N                                                       |
| GCA_903894915.1_freshwater_MAG_---_AlinenLipids_bin-5330_00696   | natural    | 10 | T   | cheA  | ko:K03407                     | CheW,H_kinase_dim,HATPase_c,Hpt,P2                                       |
| GCA_903918245.1_freshwater_MAG_---_AM-lipid-01-D1_bin-099_00177  | natural    | 10 | S   | -     | -                             | Bac_rhodopsin                                                            |
| GCA_903918245.1_freshwater_MAG_---_AM-lipid-01-D1_bin-099_00449  | natural    | 10 | P   | -     | -                             | Mntp                                                                     |
| GCA_903925195.1_freshwater_MAG_---_YR_bin-4708_00058             | natural    | 10 | S   | -     | -                             | DUF1295                                                                  |
| GCA_903925195.1_freshwater_MAG_---_YR_bin-4708_00302             | natural    | 10 | E   | -     | ko:K02035                     | SBP_bac_5                                                                |
| GCA_903925195.1_freshwater_MAG_---_YR_bin-4708_00369             | natural    | 10 | C   | atpG  | ko:K02115                     | ATP-synt                                                                 |
| GCA_903925195.1_freshwater_MAG_---_YR_bin-4708_00409             | natural    | 10 | S   | -     | -                             | SHOCT,bPH_3                                                              |
| GCA_903925195.1_freshwater_MAG_---_YR_bin-4708_00566             | natural    | 10 | V   | -     | ko:K01990                     | ABC_tran                                                                 |
| GCA_903925195.1_freshwater_MAG_---_YR_bin-4708_00869             | natural    | 10 | M   | -     | ko:K07258                     | Peptidase_S11                                                            |
| GCA_903925195.1_freshwater_MAG_---_YR_bin-4708_00974             | natural    | 10 | L   | -     | -                             | UPF0020                                                                  |
| GCA_946478715.1_SRR10754055_bin.5_metawrap_v1.3.0_MAG_00195      | natural    | 10 | M   | rseP  | ko:K11749                     | PDZ,PDZ_2,Peptidase_M50                                                  |
| GCA_946482285.1_SRR14536431_bin.16_metawrap_v1.3.0_MAG_00562     | natural    | 10 | L   | -     | ko:K07447                     | RuvX                                                                     |
| GCA_027365555.1_ASM2736555v1_00159                               | engineered | 41 | NO  | -     | -                             | Methyltransf_11                                                          |
| GCA_027426835.1_ASM2742683v1_00249                               | engineered | 32 | NOU | -     | -                             | Dis_P_Dis,Peptidase_A24                                                  |
| GCA_027427555.1_ASM2742755v1_00522                               | engineered | 31 | O   | -     | -                             | Colicin_V,Trypsin_2                                                      |
| GCA_027427475.1_ASM2742747v1_00517                               | engineered | 26 | S   | recX  | ko:K03565                     | RecX                                                                     |
| GCA_027427595.1_ASM2742759v1_00706                               | engineered | 26 | U   | -     | ko:K02456                     | N_methyl                                                                 |
| GCA_027427715.1_ASM2742771v1_00404                               | engineered | 26 | G   | -     | ko:K02440,ko:K06188,ko:K09874 | MIP                                                                      |
| GCA_027427195.1_ASM2742719v1_00213                               | engineered | 24 | P   | -     | ko:K01531,ko:K01535           | Cation_ATPase_N,E1-E2_ATPase,Hydrolase                                   |
| GCA_027356525.1_ASM2735652v1_00195                               | engineered | 23 | Q   | -     | ko:K01061                     | DLH                                                                      |
| GCA_027426955.1_ASM2742695v1_00459                               | engineered | 23 | C   | -     | -                             | Copper-bind,Lipoprotein_15                                               |
| GCA_027331975.1_ASM2733197v1_00227                               | engineered | 22 | J   | tlyA  | ko:K06442                     | FtsI,S4                                                                  |
| GCA_027332225.1_ASM2733222v1_00344                               | engineered | 22 | V   | macB1 | ko:K02004                     | FtsX,MacB_PCD                                                            |
| GCA_027338765.1_ASM2733876v1_00253                               | engineered | 22 | S   | nrmA  | ko:K06881                     | DHH,DHHA1                                                                |
| GCA_027427135.1_ASM2742713v1_00011                               | engineered | 22 | M   | murG  | ko:K02563                     | Glyco_tran_28_C,Glyco_transf_28                                          |
| GCA_027427255.1_ASM2742725v1_00272                               | engineered | 22 | M   | mscL  | ko:K03282                     | MscL                                                                     |
| GCA_027427575.1_ASM2742757v1_00231                               | engineered | 22 | S   | -     | -                             | DUF1361                                                                  |
| GCA_027331975.1_ASM2733197v1_00573                               | engineered | 21 | -   | -     | -                             | -                                                                        |
| GCA_027427195.1_ASM2742719v1_00559                               | engineered | 21 | C   | atpC  | ko:K02114                     | ATP-synt_DE_N                                                            |
| GCA_027427235.1_ASM2742723v1_00283                               | engineered | 21 | S   | -     | -                             | Mannosyl_trans2,PMT_2                                                    |
| GCA_027427515.1_ASM2742751v1_00091                               | engineered | 21 | M   | -     | -                             | -                                                                        |
| GCA_027427535.1_ASM2742753v1_00643                               | engineered | 21 | -   | -     | -                             | -                                                                        |
| GCA_027447005.1_ASM2744700v1_00649                               | engineered | 21 | -   | -     | -                             | -                                                                        |
| GCA_027450065.1_ASM2745006v1_00701                               | engineered | 21 | HJ  | -     | -                             | -                                                                        |
| GCA_018062785.1_ASM1806278v1_00583                               | engineered | 20 | S   | -     | -                             | CW_binding_1,Excalibur,Lipoprotein_Ltp,VanY                              |
| GCA_027334585.1_ASM2733458v1_00111                               | engineered | 20 | S   | yerB  | -                             | DUF3048,DUF3048_C                                                        |
| GCA_027334585.1_ASM2733458v1_00651                               | engineered | 20 | T   | -     | -                             | GAF_2,HATPase_c,HisKA                                                    |
| GCA_027340655.1_ASM2734065v1_00543                               | engineered | 20 | C   | cyoD  | ko:K02300                     | COX4_pro                                                                 |
| GCA_027365555.1_ASM2736555v1_00403                               | engineered | 20 | C   | -     | ko:K02109                     | ATP-synt_B                                                               |
| GCA_027426835.1_ASM2742683v1_00867                               | engineered | 20 | L   | -     | ko:K03652                     | Pur_DNA_glyco                                                            |
| GCA_027426915.1_ASM2742691v1_00701                               | engineered | 20 | F   | mutT2 | ko:K03574                     | NUDIX                                                                    |
| GCA_027427475.1_ASM2742747v1_00177                               | engineered | 20 | J   | frr   | ko:K02838                     | RRF                                                                      |
| GCA_027427475.1_ASM2742747v1_00432                               | engineered | 20 | S   | -     | ko:K07090                     | TauE                                                                     |
| GCA_027427475.1_ASM2742747v1_00717                               | engineered | 20 | J   | rpsQ  | ko:K02961                     | Ribosomal_S17                                                            |
| GCA_027328705.1_ASM2732870v1_00200                               | engineered | 19 | M   | -     | -                             | HTH_28,HTH_29,HTH_32,rve                                                 |
| GCA_027426675.1_ASM2742667v1_00347                               | engineered | 19 | L   | -     | ko:K13735                     | DUF11,Invasin_D3                                                         |
| GCA_027426915.1_ASM2742691v1_00196                               | engineered | 19 | T   | y     |                               |                                                                          |

|                                    |            |    |    |       |                               |                                   |
|------------------------------------|------------|----|----|-------|-------------------------------|-----------------------------------|
| GCA_027334585.1_ASM2733458v1_00734 | engineered | 17 | S  | -     | -                             | Lactamase_B_3                     |
| GCA_027338765.1_ASM2733876v1_00664 | engineered | 17 | S  | -     | -                             | Mannosyl_trans2                   |
| GCA_027340655.1_ASM2734065v1_00392 | engineered | 17 | O  | pepD  | ko:K08372                     | PDZ_2,Trypsin,Trypsin_2           |
| GCA_027340655.1_ASM2734065v1_00520 | engineered | 17 | G  | -     | ko:K00036                     | G6PD_C,G6PD_N                     |
| GCA_027426675.1_ASM2742667v1_00064 | engineered | 17 | P  | perR  | ko:K09825                     | FUR                               |
| GCA_027426835.1_ASM2742683v1_00891 | engineered | 17 | S  | -     | -                             | Spermine_synth                    |
| GCA_027426955.1_ASM2742695v1_00563 | engineered | 17 | J  | rluD  | ko:K06180                     | PseudoU_synth_2,S4                |
| GCA_027427055.1_ASM2742705v1_00510 | engineered | 17 | V  | -     | ko:K02004                     | FtsX,MacB_PCD                     |
| GCA_027427255.1_ASM2742725v1_00340 | engineered | 17 | H  | nadD  | ko:K00969                     | CTP_transf_like                   |
| GCA_027427495.1_ASM2742749v1_00142 | engineered | 17 | V  | -     | ko:K02004                     | FtsX,MacB_PCD                     |
| GCA_027449065.1_ASM2744906v1_00473 | engineered | 17 | G  | pgl   | ko:K01057                     | Glucosamine_iso                   |
| GCA_020428425.1_ASM2042842v1_00516 | engineered | 16 | J  | rluB  | ko:K06178,ko:K06182           | PseudoU_synth_2,S4                |
| GCA_027323755.1_ASM2732375v1_00059 | engineered | 16 | V  | -     | -                             | AbiEii                            |
| GCA_027323755.1_ASM2732375v1_00431 | engineered | 16 | M  | -     | -                             | PT-HINT,RHS_repeat,Ricin_B_lectin |
| GCA_027327265.1_ASM2732726v1_00462 | engineered | 16 | IQ | -     | ko:K00034,ko:K00059,ko:K03366 | adh_short_C2                      |
| GCA_027328705.1_ASM2732870v1_00224 | engineered | 16 | C  | atpF  | ko:K02109                     | ATP-synt_B                        |
| GCA_027340655.1_ASM2734065v1_00541 | engineered | 16 | T  | -     | -                             | HATPase_c,HisKA                   |
| GCA_027365555.1_ASM2736555v1_00098 | engineered | 16 | K  | -     | ko:K07665                     | Response_reg,Trans_reg_C          |
| GCA_027365795.1_ASM2736579v1_00830 | engineered | 16 | M  | -     | -                             | CW_binding_1,Lactamase_B          |
| GCA_027366295.1_ASM2736629v1_00588 | engineered | 16 | S  | cbbZp | ko:K01091                     | HAD_2                             |
| GCA_027426695.1_ASM2742669v1_00148 | engineered | 16 | E  | -     | ko:K02035                     | SBP_bac_5                         |
| GCA_027426875.1_ASM2742687v1_00105 | engineered | 16 | D  | -     | -                             | PG_binding_1,PG_binding_4,YkuD    |
| GCA_027426975.1_ASM2742697v1_00458 | engineered | 16 | F  | -     | ko:K02428                     | Ham1p_like                        |
| GCA_027427035.1_ASM2742703v1_00327 | engineered | 16 | J  | rplO  | ko:K02876                     | Ribosomal_L27A                    |
| GCA_027427115.1_ASM2742711v1_00158 | engineered | 16 | J  | truB  | ko:K03177                     | TruB-C_2,TruB_C_2,TruB_N          |
| GCA_027427155.1_ASM2742715v1_00687 | engineered | 16 | S  | -     | -                             | SHOCT_bPH_3                       |
| GCA_027427295.1_ASM2742729v1_00254 | engineered | 16 | S  | ydiB  | ko:K06925                     | TsaE                              |
| GCA_027427695.1_ASM2742769v1_00792 | engineered | 16 | J  | fmt   | ko:K00604                     | Formyl_trans_C,Formyl_trans_N     |
| GCA_027427755.1_ASM2742775v1_00105 | engineered | 16 | S  | -     | -                             | DUF2779                           |

## Supplementary Table 4b. The most prevalent protein clusters common to Saccharibacteria from both human body and other mammals.

| Protein cluster                                            | Prevalence | Prevalence in human body | Prevalence in other mammals | eggNOG annotation |                |                     |                                                  |  |
|------------------------------------------------------------|------------|--------------------------|-----------------------------|-------------------|----------------|---------------------|--------------------------------------------------|--|
|                                                            |            |                          |                             | COG category      | Preferred name | KEGG ko             | PFAMs                                            |  |
| R0170300217_tooth_RA.megahit.bin.23_00427                  | 1,301      | 1299                     | 2                           | ET                | -              | ko:K02029,ko:K02030 | SBP_bac_3                                        |  |
| GCA_904425485.1_PRJEB35131-2_00068                         | 1,170      | 1168                     | 2                           | E                 | -              | ko:K02028           | ABC_tranRad17                                    |  |
| R0170300061_tooth_RA.megahit.bin.12_00442                  | 929        | 928                      | 1                           | V                 | -              | ko:K01992           | ABC2_membrane,ABC2_membrane_3                    |  |
| SZAXPI018287-129_RA_dental.metaspades.bin.34_00211         | 788        | 787                      | 1                           | V                 | vex2           | ko:K02003           | ABC_tran                                         |  |
| SZAXPI018280-95_RA_dental.metaspades.bin.36_00084          | 785        | 784                      | 1                           | S                 | yhgE           | ko:K01421           | ABC2_membrane_3,DUF3533                          |  |
| SZAXPI018488-20_RA_saliva.metaspades.bin.49_00044          | 784        | 783                      | 1                           | S                 | -              | ko:K09131           | DUF167                                           |  |
| GCA_905372305.1_SRR9217408-mag-bin.12_00979                | 755        | 754                      | 1                           | S                 | -              | -                   | -                                                |  |
| GCA_905373795.1_SRR9217490-mag-bin.5_00217                 | 707        | 706                      | 1                           | C                 | -              | -                   | FAD_binding_6,NAD_binding_1                      |  |
| SZAXPI018184-41_RA_dental.metaspades.bin.37_00749          | 670        | 669                      | 1                           | S                 | -              | ko:K02234           | CobW_C.cobW                                      |  |
| SZAXPI018173-27_RA_dental.metaspades.bin.20_00373          | 665        | 664                      | 1                           | G                 | -              | ko:K22278           | Polysacc_deac_1                                  |  |
| RSZYD18078673_A_saliva.metaspades.bin.3_00636              | 570        | 569                      | 1                           | F                 | cyaB           | ko:K05873           | CYTH                                             |  |
| SZAXPI018288-133_RA_dental.metaspades.bin.4_00316          | 558        | 557                      | 1                           | S                 | -              | -                   | VIT1                                             |  |
| SRR8114009.metaspades.bin.3_00262                          | 465        | 464                      | 1                           | C                 | -              | -                   | -                                                |  |
| GCA_017460305.1_00519                                      | 457        | 450                      | 7                           | J                 | merA           | ko:K00520,ko:K21739 | Pyr_redox_2,Pyr_redox_dim                        |  |
| R0170300222_tooth_RA.megahit.bin.94_00820                  | 394        | 393                      | 1                           | J                 | rplW           | ko:K02892           | Ribosomal_L23                                    |  |
| GCA_017460165.1_00506                                      | 372        | 366                      | 6                           | S                 | -              | ko:K06910           | PBP                                              |  |
| YS000906_saliva.spades.bin.34_00676                        | 353        | 352                      | 1                           | O                 | -              | ko:K05521           | ADP_ribosyl_GH_DSPc                              |  |
| R0170300268_tooth_RAH.megahit.bin.13_00695                 | 344        | 343                      | 1                           | M                 | -              | ko:K03928           | Abhydrolase_6,Hydrolase_4                        |  |
| GCA_947367795.1_SRR15431173_bin.17_metawrap.v1.3_MAG_00453 | 288        | 169                      | 119                         | D                 | -              | -                   | FtsX,MacB_PCD                                    |  |
| SZAXPI018492-24_RA_saliva.metaspades.bin.47_00304          | 286        | 190                      | 96                          | G                 | tpiA           | ko:K01803           | FtsA                                             |  |
| RDPYD18189966_A_saliva.metaspades.bin.40_00357             | 282        | 196                      | 86                          | J                 | rumA           | ko:K03215           | TRAM,tRNA_U5-meth_tr                             |  |
| R0170300055_tooth_RA.megahit.bin.35_00498                  | 272        | 244                      | 28                          | -                 | nudA           | -                   | ASCH,NUDIX                                       |  |
| GCA_017432705.1_00288                                      | 261        | 192                      | 69                          | M                 | -              | -                   | Glyco_trans_1_4,Glyco_trans_4_4,Glycos_transf_1  |  |
| GCA_017431955.1_00690                                      | 253        | 187                      | 66                          | M                 | murE           | ko:K01928           | Mur_ligase,Mur_ligase_C,Mur_ligase_M             |  |
| GCA_947362105.1_SRR15194760_bin.16_metawrap.v1.3_MAG_00715 | 242        | 189                      | 53                          | J                 | tgt            | ko:K00773           | TGT                                              |  |
| R0170300056_tooth_RA.megahit.bin.105_00072                 | 241        | 193                      | 48                          | O                 | -              | ko:K03686           | DnaJ,DnaJ_C                                      |  |
| RDPYD18189960_A_saliva.metaspades.bin.21_00508             | 238        | 191                      | 47                          | O                 | grpE           | ko:K03687           | GrpE                                             |  |
| GCA_946407955.1_SRR12081294_bin.80_metaWRAP.v1.3_MAG_00082 | 230        | 205                      | 25                          | O                 | htpX           | ko:K03799           | Peptidase_M48                                    |  |
| R0170300261_tooth_RAH.megahit.bin.18_00076                 | 228        | 227                      | 1                           | S                 | -              | -                   | DUF2207                                          |  |
| SZAXPI018492-24_RA_saliva.metaspades.bin.47_00079          | 227        | 187                      | 40                          | L                 | greA           | ko:K03624           | GreA_GreB,GreA_GreB_N                            |  |
| R0170300110_tooth_RA.megahit.bin.38_00585                  | 226        | 224                      | 2                           | K                 | polA           | ko:K02335           | 5_3_exonuc_5_3_exonuc_N,DNA_pol_A,DNA_pol_A_exo1 |  |
| GCA_013099195.1_ASM1309919v1_00424                         | 224        | 222                      | 2                           | C                 | -              | -                   | Nitroreductase                                   |  |
| RSZYD18187327_A_saliva.metaspades.bin.15_00164             | 218        | 192                      | 26                          | J                 | ksgA           | ko:K02528           | RrnaAD                                           |  |
| RSZAXPI002479-169_RAH_saliva.metaspades.bin.73_00452       | 210        | 209                      | 1                           | K                 | -              | -                   | Acetyltransf_1                                   |  |
| RSZAXPI002619-34_RA_dental.metaspades.bin.5_00585          | 207        | 183                      | 24                          | P                 | -              | ko:K12952           | E1-E2_ATPase,Hydrolase                           |  |
| GCA_945873065.1_SRR15732359_bin.18_metaWRAP.v1.3_MAG_00306 | 205        | 204                      | 1                           | T                 | yabE           | -                   | 3D,DUF348,G5                                     |  |
| GCA_017432425.1_00353                                      | 204        | 179                      | 25                          | M                 | murE           | ko:K01928           | Mur_ligase,Mur_ligase_C,Mur_ligase_M             |  |
| GCA_013316435.1_ASM1331643v1_00252                         | 202        | 190                      | 12                          | G                 | gpml           | ko:K15633           | Metalloenzyme,Phosphodiesterase,IPGM_N           |  |
| RSZYD18078115_A_saliva.metaspades.bin.19_00574             | 199        | 174                      | 25                          | U                 | znuB           | ko:K02075,ko:K09816 | ABC-3                                            |  |
| R0170300211_tooth_RA.megahit.bin.13_00251                  | 198        | 135                      | 63                          | -                 | -              | -                   | -                                                |  |
| RSZYD18078615_A_saliva.metaspades.bin.32_00426             | 196        | 181                      | 15                          | V                 | bceA           | ko:K02003           | ABC_tran                                         |  |
| GCA_946626365.1_SRR873609_bin.132_metaWRAP.v1.3_MAG_00407  | 195        | 137                      | 58                          | F                 | tmk            | ko:K00943           | Thymidylate_kin                                  |  |
| RDPYD18088979_A_saliva.metaspades.bin.8_00708              | 195        | 189                      | 6                           | S                 | -              | -                   | DUF308                                           |  |
| RDPYD18201655_A_saliva.metaspades.bin.21_00167             | 195        | 191                      | 4                           | S                 | -              | -                   | AI-2E_transport                                  |  |
| RSZYD18078100_A_saliva.metaspades.bin.89_00583             | 192        | 191                      | 1                           | P                 | -              | -                   | Vut_1                                            |  |
| RSZYD18078259_A_saliva.metaspades.bin.22_00324             | 192        | 188                      | 4                           | I                 | -              | ko:K00627           | Abhydrolase_1,Abhydrolase_6,Hydrolase_4          |  |
| RSZYD18187280_A_saliva.metaspades.bin.37_00557             | 191        | 188                      | 3                           | S                 | -              | -                   | PDDEXK_4                                         |  |
| R0170300136_tooth_RA.megahit.bin.73_00229                  | 190        | 187                      | 3                           | S                 | -              | -                   | DUF2974                                          |  |
| R0170300161_tooth_RA.megahit.bin.150_00114                 | 190        | 177                      | 13                          | J                 | pheT           | ko:K01890           | B3_4,B5,FDX-ACB,tRNA_bind                        |  |
| R0170300271_tooth_RAH.megahit.bin.16_00702                 | 190        | 181                      | 9                           | L                 | rnhB           | ko:K03470           | RNase_HII                                        |  |
| RSZYD18187002_A_saliva.metaspades.bin.39_00225             | 190        | 189                      | 1                           | L                 | -              | ko:K08316           | Cons_hypoth95                                    |  |



# Supplementary Table 4c. The most prevalent protein clusters common to Saccharibacteria from both natural and engineered environments.

| Protein cluster                                                  | Prevalence | Prevalence in engineered | Prevalence in natural | eggNOG annotation |                |                     |                                                 |
|------------------------------------------------------------------|------------|--------------------------|-----------------------|-------------------|----------------|---------------------|-------------------------------------------------|
|                                                                  |            |                          |                       | COG category      | Preferred name | KEGG ko             | PFAMs                                           |
| GCA_016700375.1_ASM1670037v1_00297                               | 154        | 83                       | 71                    | C                 | cyoC           | ko:K02299           | COX3                                            |
| GCA_023253175.1_ASM2325317v1_00100                               | 152        | 83                       | 69                    | C                 | cyoB           | ko:K02298           | COX1                                            |
| GCA_013289705.1_ASM1328970v1_00600                               | 145        | 75                       | 70                    | U                 | -              | ko:K02653           | T2SSF                                           |
| GCA_027356525.1_ASM2735652v1_01247                               | 144        | 82                       | 62                    | M                 | -              | -                   | Glycos_transf_2                                 |
| GCA_002413865.1_ASM241386v1_00091                                | 137        | 73                       | 64                    | S                 | -              | -                   | Peptidase_M16,Peptidase_M16_C                   |
| GCA_027427235.1_ASM2742723v1_00314                               | 130        | 70                       | 60                    | E                 | map            | ko:K01265           | Peptidase_M24                                   |
| GCA_016178135.1_ASM1617813v1_00470                               | 121        | 59                       | 62                    | J                 | rpmC           | ko:K02904           | Ribosomal_L29                                   |
| GCA_013289705.1_ASM1328970v1_01190                               | 111        | 46                       | 65                    | J                 | rplD           | ko:K02926           | Ribosomal_L4                                    |
| GCA_014377525.1_ASM1437752v1_00506                               | 109        | 66                       | 43                    | G                 | -              | -                   | Glyco_transf_4,Glyco_transf_5,Glycos_transf_1   |
| GCA_027427475.1_ASM2742747v1_00039                               | 109        | 70                       | 39                    | O                 | -              | -                   | Glutaredoxin                                    |
| GCA_027426655.1_ASM2742665v1_00728                               | 108        | 52                       | 56                    | L                 | dnaN           | ko:K02338           | DNA_pol3_beta,DNA_pol3_beta_2,DNA_pol3_beta_3   |
| GCA_027426975.1_ASM2742697v1_00297                               | 108        | 71                       | 37                    | C                 | atpB           | ko:K02108           | ATP-synt_A                                      |
| GCA_027314885.1_ASM2731488v1_00882                               | 107        | 57                       | 50                    | -                 | -              | -                   | -                                               |
| GCA_027450165.1_ASM2745016v1_00636                               | 107        | 59                       | 48                    | G                 | -              | -                   | PfkB                                            |
| GCA_003516025.1_ASM351602v1_00273                                | 105        | 50                       | 55                    | L                 | -              | ko:K11927           | DEAD,Helicase_C                                 |
| GCA_002413755.1_ASM241375v1_01067                                | 104        | 69                       | 35                    | C                 | atpG           | ko:K02115           | ATP-synt                                        |
| GCA_018062805.1_ASM1806280v1_00338                               | 101        | 74                       | 27                    | G                 | -              | ko:K01178           | Glucodextran_N,Glyco_hydro_15                   |
| GCA_027356525.1_ASM2735652v1_00189                               | 100        | 63                       | 37                    | F                 | -              | -                   | Thy1                                            |
| GCA_002404255.1_ASM240425v1_00726                                | 99         | 46                       | 53                    | H                 | metK           | ko:K00789           | S-AdoMet_synt_C,S-AdoMet_synt_M,S-AdoMet_synt_N |
| GCA_014377525.1_ASM1437752v1_00277                               | 99         | 40                       | 59                    | K                 | nusB           | ko:K03625           | NusB                                            |
| GCA_025928155.1_ASM2592815v1_00025                               | 95         | 53                       | 42                    | C                 | atpE           | ko:K02110,ko:K02124 | ATP-synt_C                                      |
| GCA_016196105.1_ASM1619610v1_00662                               | 93         | 41                       | 52                    | L                 | -              | -                   | UPF0020                                         |
| GCA_014377695.1_ASM1437769v1_00245                               | 90         | 37                       | 53                    | -                 | -              | -                   | -                                               |
| GCA_002405335.1_ASM240533v1_01098                                | 88         | 47                       | 41                    | J                 | rplO           | ko:K02876           | Ribosomal_L27A                                  |
| GCA_027315225.1_ASM2731522v1_00953                               | 86         | 27                       | 59                    | Q                 | -              | -                   | Methyltransf_11                                 |
| GCA_003962975.1_ASM396297v1_00248                                | 85         | 50                       | 35                    | D                 | ftsA           | ko:K03590           | FtsA,SHS2_FTSA                                  |
| GCA_027315225.1_ASM2731522v1_00323                               | 84         | 53                       | 31                    | O                 | -              | ko:K08070           | PDZ_2,Trypsin_2                                 |
| GCA_027426815.1_ASM2742681v1_00674                               | 83         | 38                       | 45                    | P                 | cadA           | -                   | E1-E2_ATPase,Hydrolase                          |
| GCA_021404905.1_ASM2140490v1_00579                               | 82         | 44                       | 38                    | G                 | pyk            | ko:K00873           | PK,PK_C                                         |
| GCA_025450135.1_ASM2545013v1_00069                               | 82         | 58                       | 24                    | L                 | polA           | ko:K02335           | 5_3_exonuc,5_3_exonuc_N,DNA_pol_A               |
| GCA_025928155.1_ASM2592815v1_00671                               | 81         | 53                       | 28                    | EGKP              | -              | -                   | MFS_1                                           |
| GCA_903840315.1_freshwater_MAG --- AM-lipid-02-D2_bin-0413_00149 | 81         | 51                       | 30                    | V                 | -              | ko:K01990           | ABC_tran                                        |
| GCA_946482285.1_SRR14536431_bin.16_metawrap_v1.3.0_MAG_00412     | 81         | 32                       | 49                    | M                 | murI           | ko:K01776           | Asp_Glu_race                                    |
| GCA_027426835.1_ASM2742683v1_00468                               | 79         | 50                       | 29                    | V                 | -              | ko:K01992           | ABC2_membrane                                   |
| GCA_027427295.1_ASM2742729v1_00325                               | 79         | 17                       | 62                    | S                 | -              | -                   | PIG-L                                           |
| GCA_002336935.1_ASM233693v1_00058                                | 77         | 35                       | 42                    | V                 | ywjA           | ko:K06147,ko:K18893 | ABC_membrane,ABC_tran                           |
| GCA_027446985.1_ASM2744698v1_00015                               | 77         | 60                       | 17                    | H                 | apbE           | ko:K03734           | ApbE,DUF2271                                    |
| GCA_903877025.1_freshwater_MAG --- AlinenLipids_bin-2261_00197   | 75         | 52                       | 23                    | S                 | -              | -                   | YbjQ_1                                          |
| GCA_016699955.1_ASM1669995v1_00911                               | 74         | 30                       | 44                    | C                 | cyoA           | ko:K02297           | COX2,COX_ARM                                    |
| GCA_027315225.1_ASM2731522v1_00948                               | 74         | 54                       | 20                    | S                 | -              | -                   | bPH_2                                           |
| GCA_014377695.1_ASM1437769v1_00635                               | 73         | 24                       | 49                    | J                 | gatC           | ko:K02435           | Glu-tRNAGln                                     |
| GCA_016176605.1_ASM1617660v1_00253                               | 72         | 38                       | 34                    | L                 | pcrA           | ko:K03657           | UvrD-helicase,UvrD_C                            |
| GCA_002331045.1_ASM233104v1_00957                                | 69         | 45                       | 24                    | G                 | -              | ko:K01621           | XFP,XFP_C,XFP_N                                 |
| GCA_002404125.1_ASM240412v1_00303                                | 69         | 54                       | 15                    | C                 | -              | -                   | FAD_binding_6,NAD_binding_1,NQR2_RnfD_RnfE      |
| GCA_020428275.1_ASM2042827v1_00226                               | 69         | 45                       | 24                    | L                 | -              | ko:K11927           | DEAD,Helicase_C                                 |
| GCA_026707815.1_ASM2670781v1_00384                               | 67         | 31                       | 36                    | J                 | rpmE2          | ko:K02909           | Ribosomal_L31                                   |
| GCA_027426775.1_ASM2742677v1_00135                               | 67         | 33                       | 34                    | K                 | lexA           | ko:K01356           | LexA_DNA_bind,Peptidase_S24                     |
| GCA_903946795.1_freshwater_MAG --- Loc090907-4m_bin-620_00726    | 67         | 33                       | 34                    | P                 | -              | -                   | Nramp                                           |
| GCA_002405335.1_ASM240533v1_00808                                | 66         | 44                       | 22                    | T                 | cseB           | -                   | Response_reg,Trans_reg_C                        |
| GCA_027427195.1_ASM2742719v1_00609                               | 66         | 43                       | 23                    | M                 | murF           | ko:K01929           | Mur_ligase,Mur_ligase_C,Mur_ligase_M            |
| GCA_002404255.1_ASM240425v1_00553                                | 65         | 25                       | 40                    | L                 | xseA           | ko:K03601           | Exonuc_VII_L,tRNA_anti_2                        |
| GCA_027315225.1_ASM2731522v1_00269                               | 65         | 24                       | 41                    | S                 | -              | -                   | FMN_red                                         |
| GCA_027315225.1_ASM2731522v1_00820                               | 65         | 60                       | 5                     | C                 | -              | -                   | Cytochrom_B_N_2                                 |
| GCA_016219345.1_ASM1621934v1_00450                               | 64         | 26                       | 38                    | L                 | -              | ko:K02346           | IMS,IMS_C                                       |
| GCA_025450135.1_ASM2545013v1_00739                               | 64         | 48                       | 16                    | J                 | cysS           | ko:K01883           | DALR_2,tRNA-synt_1e                             |
| GCA_016183515.1_ASM1618351v1_00175                               | 63         | 10                       | 53                    | G                 | -              | ko:K05350           | Glyco_hydro_1                                   |
| GCA_027492535.1_ASM2749253v1_00078                               | 62         | 43                       | 19                    | C                 | atpG           | ko:K02115           | ATP-synt                                        |
| GCA_002404125.1_ASM240412v1_01019                                | 61         | 32                       | 29                    | S                 | -              | ko:K21688           | DUF348,G5,SLT                                   |
| GCA_027427255.1_ASM2742725v1_00502                               | 61         | 38                       | 23                    | S                 | -              | -                   | VKOR                                            |
| GCA_027426955.1_ASM2742695v1_00232                               | 60         | 58                       | 2                     | -                 | -              | -                   | -                                               |
| GCA_016178135.1_ASM1617813v1_00319                               | 59         | 23                       | 36                    | E                 | NPEPPS         | ko:K08776           | ERAP1_C,Peptidase_M1                            |

|                                                            |    |    |    |     |        |           |                                              |
|------------------------------------------------------------|----|----|----|-----|--------|-----------|----------------------------------------------|
| GCA_903836325.1_freshwater_MAG_---_KR2_bin-0178_00428      | 59 | 49 | 10 | -   | -      | -         | -                                            |
| GCA_002413755.1_ASM241375v1_00079                          | 58 | 9  | 49 | D   | tig    | ko:K03545 | FKBP_C,Trigger_C,Trigger_N                   |
| GCA_002441585.1_ASM244158v1_00111                          | 58 | 36 | 22 | J   | rpsT   | ko:K02968 | Ribosomal_S20p                               |
| GCA_002452155.1_ASM245215v1_00239                          | 57 | 15 | 42 | J   | rpsQ   | ko:K02961 | Ribosomal_S17                                |
| GCA_002952755.1_ASM295275v1_00484                          | 57 | 43 | 14 | E   | -      | ko:K02035 | SBP_bac_5                                    |
| GCA_027340655.1_ASM2734065v1_00390                         | 57 | 39 | 18 | L   | dinB   | ko:K02346 | IMS,IMS_C,IMS_HHH                            |
| GCA_002413835.1_ASM241383v1_01184                          | 56 | 40 | 16 | S   | rnuC   | ko:K09760 | RmuC                                         |
| GCA_016178135.1_ASM1617813v1_00691                         | 56 | 16 | 40 | S   | obg    | ko:K03979 | DUF1967,GTP1_OBG,MMR_HSR1                    |
| GCA_016196105.1_ASM1619610v1_00691                         | 56 | 20 | 36 | J   | pth    | ko:K01056 | Pept_tRNA_hydro                              |
| GCA_027334585.1_ASM2733458v1_00450                         | 56 | 13 | 43 | EGP | -      | -         | MFS_1                                        |
| GCA_007127855.1_ASM712785v1_00678                          | 55 | 37 | 18 | S   | -      | -         | Zincin_1                                     |
| GCA_014377695.1_ASM1437769v1_00168                         | 55 | 27 | 28 | O   | prsA   | ko:K07533 | Rotamase_2,Rotamase_3,SurA_N_3               |
| GCA_014377695.1_ASM1437769v1_00602                         | 55 | 9  | 46 | P   | -      | ko:K07238 | Zip                                          |
| GCA_027427715.1_ASM2742771v1_00638                         | 55 | 38 | 17 | GK  | -      | -         | ROK                                          |
| GCA_004100325.1_ASM410032v1_00862                          | 54 | 15 | 39 | S   | -      | -         | FMN_red                                      |
| GCA_020428435.1_ASM2042843v1_00246                         | 54 | 26 | 28 | V   | -      | ko:K01990 | ABC_tran,DUF4162                             |
| GCA_020428435.1_ASM2042843v1_00266                         | 54 | 36 | 18 | C   | atpC   | ko:K02114 | ATP-synt_DE,ATP-synt_DE_N                    |
| GCA_027426775.1_ASM2742677v1_00168                         | 54 | 32 | 22 | EGP | -      | -         | MFS_1                                        |
| GCA_002404255.1_ASM240425v1_00818                          | 53 | 47 | 6  | S   | obg    | ko:K03979 | DUF1967,GTP1_OBG,MMR_HSR1                    |
| GCA_016699935.1_ASM1669993v1_00464                         | 53 | 22 | 31 | O   | bcp    | ko:K03564 | AhpC-TSA                                     |
| GCA_018062785.1_ASM1806278v1_00283                         | 53 | 33 | 20 | J   | -      | ko:K07566 | Sua5_yciO_yrdC                               |
| GCA_027426995.1_ASM2742699v1_00355                         | 53 | 46 | 7  | F   | -      | -         | Ham1p_like                                   |
| GCA_027450065.1_ASM2745006v1_00004                         | 53 | 38 | 15 | C   | atpC   | ko:K02114 | ATP-synt_DE_N                                |
| GCA_943350085.1_RH-15aug16-19_00550                        | 53 | 25 | 28 | J   | valS   | ko:K01873 | Anticodon_1,Val_tRNA-synt_C,tRNA-synt_1      |
| GCA_003133385.1_20120500_P26_00147                         | 52 | 30 | 22 | J   | MRPS16 | ko:K02959 | Ribosomal_S16                                |
| GCA_016187125.1_ASM1618712v1_00748                         | 52 | 30 | 22 | C   | yvgN   | -         | Aldo_ket_red                                 |
| GCA_027326965.1_ASM2732696v1_00054                         | 52 | 13 | 39 | M   | -      | -         | Glycos_transf_2                              |
| GCA_027450065.1_ASM2745006v1_00007                         | 52 | 29 | 23 | C   | atpA   | ko:K02111 | ATP-synt_ab,ATP-synt_ab_C,ATP-synt_ab_N,OSCP |
| GCA_016789455.1_ASM1678945v1_01057                         | 51 | 33 | 18 | S   | -      | -         | YdjM                                         |
| GCA_020427985.1_ASM2042798v1_00807                         | 51 | 47 | 4  | S   | ybhK   | -         | UPF0052                                      |
| GCA_946479115.1_ERR5385026_bin.7_metawrap_v1.3.0_MAG_00819 | 51 | 29 | 22 | L   | mpg    | ko:K03652 | Pur_DNA_glyco                                |
| GCA_001790525.1_ASM179052v1_00401                          | 50 | 18 | 32 | P   | pspE   | ko:K03972 | Rhodanese                                    |
| GCA_002434055.1_ASM243405v1_00622                          | 50 | 25 | 25 | L   | -      | -         | UPF0020                                      |
| GCA_003962975.1_ASM396297v1_00724                          | 50 | 14 | 36 | -   | -      | -         | Glyco_hydro_42                               |
| GCA_020428005.1_ASM2042800v1_00272                         | 50 | 23 | 27 | M   | -      | ko:K07011 | Glycos_transf_2                              |

## Supplementary Table 4d. Protein clusters common to Saccharibacteria from five different environments.

| Protein cluster                                             | Prevalence | eggNOG annotation |                |           | PFAMs                                      |
|-------------------------------------------------------------|------------|-------------------|----------------|-----------|--------------------------------------------|
|                                                             |            | COG category      | Preferred name | KEGG ko   |                                            |
| GCA_016699935.1_ASM1669993v1_01556                          | 2,032      | J                 | rplP           | ko:K02878 | Ribosomal_L16                              |
| GCA_001790525.1_ASM179052v1_00592                           | 2,028      | J                 | rpsS           | ko:K02965 | Ribosomal_S19                              |
| RDPYD18098861_A_saliva.metaspades.bin.17_00014              | 2,027      | J                 | rplE           | ko:K02931 | Ribosomal_L5,Ribosomal_L5_C                |
| GCA_019352195.1_ASM1935219v1_00372                          | 2,026      | J                 | rpsC           | ko:K02982 | KH_2,Ribosomal_S3_C                        |
| GCA_916439725.1_DRR214962_bin.20_metaWRAP_v1.1_MAG_00793    | 2,026      | J                 | rplN           | ko:K02874 | Ribosomal_L14                              |
| RSZAXPI002673-20_RA_dental.metaspades.bin.3_00122           | 2,014      | J                 | rplB           | ko:K02886 | Ribosomal_L2,Ribosomal_L2_C                |
| GCA_003133385.1_20120500_P26_00795                          | 2,009      | J                 | rpsK           | ko:K02948 | Ribosomal_S11                              |
| GCA_004100325.1_ASM410032v1_00702                           | 2,000      | J                 | rplF           | ko:K02933 | Ribosomal_L6                               |
| GCA_005697565.1_ASM569756v1_00183                           | 2,000      | J                 | rpsB           | ko:K02967 | Ribosomal_S2                               |
| GCA_027365795.1_ASM2736579v1_00677                          | 2,000      | J                 | rpsM           | ko:K02952 | Ribosomal_S13                              |
| GCA_017459845.1_00208                                       | 1,982      | K                 | nusG           | ko:K02601 | KOW_NusG                                   |
| GCA_947428935.1_SRR19981124_bin.14_metawrap_v1.3_MAG_00100  | 1,981      | D                 | ftsE           | ko:K09812 | ABC_tran                                   |
| GCA_004294965.1_ASM429496v1_00301                           | 1,975      | J                 | rplK           | ko:K02867 | Ribosomal_L11,Ribosomal_L11_N              |
| GCA_904425485.1_PRJEB35131-2_00116                          | 1,970      | O                 | dnaK           | ko:K04043 | HSP70                                      |
| GCA_002839415.1_ASM283941v1_00383                           | 1,964      | O                 | clpP           | ko:K01358 | CLP_protease                               |
| GCA_947425995.1_SRR19981123_bin.1_metawrap_v1.3_MAG_00142   | 1,964      | L                 | ruvB           | ko:K03551 | RuvB_C,RuvB_N                              |
| R0170300137_tooth_RA.megahit.bin.43_00926                   | 1,964      | J                 | prfA           | ko:K02835 | PCRF,RF-1                                  |
| GCA_015655045.1_ASM1565504v1_00381                          | 1,959      | L                 | uvrB           | ko:K03702 | Helicase_C,ResIII,UVR,UvrB                 |
| GCA_027338765.1_ASM2733876v1_00143                          | 1,957      | J                 | rpsG           | ko:K02992 | Ribosomal_S7                               |
| RDPYD18098966_A_saliva.metaspades.bin.10_00560              | 1,955      | J                 | rpsO           | ko:K02956 | Ribosomal_S15                              |
| GCA_013333375.2_ASM1333337v2_00474                          | 1,954      | J                 | rnc            | ko:K03685 | Ribonucleas_3_3,dsrm                       |
| RSZYD18078736_A_saliva.metaspades.bin.17_00455              | 1,951      | L                 | uvrA           | ko:K03701 | ABC_tran                                   |
| GCA_017421685.1_00508                                       | 1,946      | C                 | ppa            | ko:K01507 | Pyrophosphatase                            |
| GCA_009781895.1_ASM978189v1_00017                           | 1,943      | J                 | rpsL           | ko:K02950 | Ribosomal_S12,S23                          |
| GCA_947171955.1_SRR14862904_bin.27_metawrap_v1.3_MAG_00481  | 1,940      | M                 | mraY           | ko:K01000 | Glycos_transf_4,MraY_sig1                  |
| GCA_014377525.1_ASM1437752v1_00554                          | 1,940      | L                 | recA           | ko:K03553 | RecA                                       |
| GCA_943353165.1_RH-20apr16-349_00320                        | 1,939      | K                 | -              | -         | -                                          |
| GCA_002746885.1_ASM274688v1_00434                           | 1,936      | O                 | ftsH           | ko:K03798 | AAA,FtsH_ext,Peptidase_M41                 |
| RSZYD18078691_A_saliva.metaspades.bin.32_00302              | 1,932      | D                 | ftsZ           | ko:K03531 | FtsZ_C,Tubulin                             |
| RDPYD18300405_A_saliva.metaspades.bin.82_00746              | 1,932      | J                 | frf            | ko:K02838 | RRF                                        |
| R0170300083_tooth_RA.megahit.bin.110_00508                  | 1,928      | J                 | rpsJ           | ko:K02946 | Ribosomal_S10                              |
| GCA_002441585.1_ASM244158v1_00262                           | 1,922      | J                 | tuf            | ko:K02358 | GTP_EFTU,GTP_EFTU_D2,GTP_EFTU_D3           |
| GCA_017430785.1_00597                                       | 1,917      | J                 | prfB           | ko:K02836 | PCRF,RF-1                                  |
| GCA_905372725.1_SRR9217423-mag-bin.8_00150                  | 1,912      | S                 | rny            | ko:K18682 | DUF3552,HD,KH_1                            |
| GCA_024635455.1_ASM2463545v1_00070                          | 1,909      | NU                | pilB           | ko:K02652 | T2SSE,T2SSE_N                              |
| GCA_001790525.1_ASM179052v1_00300                           | 1,903      | J                 | -              | ko:K02945 | S1                                         |
| GCA_943914775.1_Tcv98XDF6C_bin.50_MAG_00239                 | 1,900      | J                 | rplS           | ko:K02884 | Ribosomal_L19                              |
| RSZYD18187694_A_saliva.metaspades.bin.6_00395               | 1,900      | NU                | -              | ko:K02669 | T2SSE                                      |
| GCA_001790525.1_ASM179052v1_00538                           | 1,894      | J                 | rplL           | ko:K02935 | Ribosomal_L12,Ribosomal_L12_N              |
| YS000161_saliva.spades.bin.8_00499                          | 1,886      | T                 | typA           | ko:K06207 | EFG_C,GTP_EFTU,GTP_EFTU_D2                 |
| GCA_905373345.1_SRR9217464-mag-bin.7_00210                  | 1,878      | U                 | secY           | ko:K03076 | SecY                                       |
| RSZYD18187492_A_saliva.metaspades.bin.15_00261              | 1,878      | L                 | dnaE           | ko:K02337 | DNA_pol3_alpha,HHH_6,PHP,tRNA_anti-codon   |
| R0170300119_tooth_RA.megahit.bin.84_00096                   | 1,871      | J                 | rpsD           | ko:K02986 | Ribosomal_S4,S4                            |
| RSZYD18187907_A_saliva.metaspades.bin.32_00730              | 1,851      | J                 | rluB           | ko:K06178 | PseudoU_synth_2,S4                         |
| GCA_017512085.1_00254                                       | 1,848      | M                 | lepA           | ko:K03596 | EFG_C,EFG_II,GTP_EFTU,GTP_EFTU_D2,LepA_C   |
| RSZYD18187119_A_saliva.metaspades.bin.9_00339               | 1,844      | S                 | -              | -         | HIGH_NTase1                                |
| GCA_017619315.1_ASM1761931v1_00069                          | 1,841      | J                 | rpmE2          | ko:K02909 | Ribosomal_L31                              |
| RSZYD18078015_A_saliva.metaspades.bin.19_00030              | 1,805      | J                 | pnp            | ko:K00962 | KH_1,PNPase,RNase_PH,RNase_PH_C,S1         |
| YS000007_saliva.spades.bin.7_00134                          | 1,805      | J                 | rpsU           | ko:K02970 | Ribosomal_S21                              |
| RSZAXPI002323-35_RAH_dental.metaspades.bin.28_00502         | 1,781      | J                 | rplJ           | ko:K02864 | Ribosomal_L10                              |
| GCA_017406985.1_00321                                       | 1,776      | U                 | secG           | ko:K03075 | SecG                                       |
| RSZYD18187801_A_saliva.metaspades.bin.75_00510              | 1,772      | J                 | rplM           | ko:K02871 | Ribosomal_L13                              |
| R0170300302_tooth_RAH.megahit.bin.114_00015                 | 1,768      | L                 | gyrB           | ko:K02470 | DNA_gyraseB,DNA_gyraseB_C,HATPase_c,Toprim |
| RDPYD18300202_A_saliva.metaspades.bin.45_00582              | 1,766      | J                 | rplU           | ko:K02888 | Ribosomal_L21p                             |
| GCA_017460065.1_00521                                       | 1,755      | J                 | rplT           | ko:K02887 | Ribosomal_L20                              |
| GCA_016187175.1_ASM1618717v1_00208                          | 1,750      | U                 | -              | -         | AAA_10,DUF87,PrgI                          |
| GCA_017404515.1_00485                                       | 1,742      | J                 | fusA           | ko:K02355 | EFG_C,EFG_II,EFG_IV,GTP_EFTU,GTP_EFTU_D2   |
| RSZAXPI002675-22_RA_dental.metaspades.bin.61_00204          | 1,738      | J                 | -              | -         | HGTP_anticodon,tRNA-synt_2b                |
| RDPYD18189868_A_saliva.metaspades.bin.61_00549              | 1,729      | KT                | relA           | ko:K00951 | ACT_4,HD_4,RelA_SpoT,TGS                   |
| GCA_001790525.1_ASM179052v1_00066                           | 1,720      | L                 | gyrA           | ko:K02469 | DNA_gyraseA_C,DNA_topoisolV                |
| RSZYD18078152_A_saliva.metaspades.bin.41_00674              | 1,711      | L                 | recG           | ko:K03655 | DEAD,Helicase_C,RecG_wedge                 |
| GCA_947428935.1_SRR19981124_bin.14_metawrap_v1.3_MAG_00498  | 1,711      | S                 | -              | ko:K03980 | MVIN                                       |
| GCA_946478715.1_SRR10754055_bin.5_metawrap_v1.3.0_MAG_00311 | 1,707      | J                 | rpsH           | ko:K02994 | Ribosomal_S8                               |
| R0170300320_tooth_RAH.megahit.bin.52_00253                  | 1,694      | J                 | rsmH           | ko:K03438 | Methyltransf_5                             |
| GCA_947068245.1_SRR12358625_bin.21_metawrap_v1.3_MAG_00112  | 1,684      | J                 | rpmJ           | ko:K02919 | Ribosomal_L36                              |



|                                                            |       |    |        |                     |                                                                                            |
|------------------------------------------------------------|-------|----|--------|---------------------|--------------------------------------------------------------------------------------------|
| GCA_017480095.1_00166                                      | 1,681 | L  | ruvC   | ko:K01159           | RuvC                                                                                       |
| GCA_017480035.1_00018                                      | 1,674 | J  | mnmA   | ko:K00566           | tRNA_Me_trans                                                                              |
| GCA_016183515.1_ASM1618351v1_00434                         | 1,672 | C  | -      | ko:K00134           | Gp_dh_C,Gp_dh_N                                                                            |
| GCA_947364965.1_SRR16350202_bin.8_metawrap_v1.3_MAG_00211  | 1,667 | D  | xerD   | ko:K04763           | Phage_int_SAM_1,Phage_integrase                                                            |
| GCA_946530965.1_SRR873598_bin.145_metaWRAP_v1.3_MAG_00689  | 1,659 | O  | groL   | ko:K04077           | Cpn60_TCP1                                                                                 |
| GCA_002343385.1_ASM234338v1_00272                          | 1,645 | D  | -      | -                   | FtsA                                                                                       |
| RDPYD18300202_A_saliva.metaspades.bin.45_00172             | 1,640 | J  | rplA   | ko:K02863           | Ribosomal_L1                                                                               |
| GCA_947425855.1_SRR19981115_bin.7_metawrap_v1.3_MAG_00004  | 1,640 | F  | apfA   | ko:K18445           | NUDIX                                                                                      |
| GCA_017404685.1_00496                                      | 1,640 | NU | -      | ko:K02652           | T2SSE,T2SSE_N                                                                              |
| GCA_020427985.1_ASM2042798v1_00710                         | 1,627 | L  | ruvA   | ko:K03550           | HHH_5,RuvA_C,RuvA_N                                                                        |
| GCA_947304825.1_SRR10912542_bin.28_metaWRAP_v1.3_MAG_00186 | 1,624 | J  | rpsE   | ko:K02988           | Ribosomal_S5,Ribosomal_S5_C                                                                |
| GCA_017510205.1_00365                                      | 1,623 | J  | aspS   | ko:K01876           | GAD,tRNA-synt_2,tRNA_anti-codon                                                            |
| GCA_017512095.1_00347                                      | 1,592 | J  | rpml   | ko:K02916           | Ribosomal_L35p                                                                             |
| GCA_009785095.1_ASM978509v1_00124                          | 1,572 | L  | dnaB   | ko:K02314           | DnaB,DnaB_C                                                                                |
| GCA_016283505.1_ASM1628350v1_00426                         | 1,572 | F  | -      | ko:K00940           | NDK                                                                                        |
| GCA_022841445.1_ASM2284144v1_00357                         | 1,563 | K  | sigA   | ko:K03086           | Sigma70_r1_1,Sigma70_r1_2,Sigma70_r2,Sigma70_r3,Sigma70_r4                                 |
| SZAXPI018357-22_RA_saliva.metaspades.bin.71_00144          | 1,554 | J  | serS   | ko:K01875           | Seryl_tRNA_N,tRNA-synt_2b                                                                  |
| GCA_017533605.1_ASM1753360v1_00018                         | 1,553 | J  | rpmG   | ko:K02913           | Ribosomal_L33                                                                              |
| RSZYD18187116_A_saliva.metaspades.bin.9_00319              | 1,552 | K  | rpoC   | ko:K03046           | RNA_pol_Rpb1_1,RNA_pol_Rpb1_2,RNA_pol_Rpb1_3,RNA_pol_Rpb1_4,RNA_pol_Rpb1_5                 |
| GCA_026707815.1_ASM2670781v1_00552                         | 1,540 | K  | rpoB   | ko:K03043           | RNA_pol_Rpb2_1,RNA_pol_Rpb2_2,RNA_pol_Rpb2_3,RNA_pol_Rpb2_45,RNA_pol_Rpb2_6,RNA_pol_Rpb2_7 |
| GCA_947428935.1_SRR19981124_bin.14_metawrap_v1.3_MAG_00038 | 1,534 | S  | -      | -                   | -                                                                                          |
| RDPYD18300271_A_saliva.metaspades.bin.13_00137             | 1,522 | D  | soj    | ko:K03496           | AAA_31                                                                                     |
| GCA_017991755.1_ASM1799175v1_00281                         | 1,514 | J  | lysS   | ko:K04567           | tRNA-synt_2,tRNA_anti-codon,tRNA_bind                                                      |
| RSZAXPI002653-13_RA_saliva.metaspades.bin.41_00630         | 1,511 | J  | ychF   | ko:K06942           | MMR_HSR1,YchF-GTPase_C                                                                     |
| RDPYD18300271_A_saliva.metaspades.bin.13_00563             | 1,508 | O  | radA   | ko:K04485           | AAA_25,ATPase,ChlI,Lon_C                                                                   |
| GCA_945873065.1_SRR15732359_bin.18_metaWRAP_v1.3_MAG_00837 | 1,502 | S  | -      | -                   | TPR_11,TPR_16,TPR_19                                                                       |
| GCA_927910745.1_ERR3827327_bin.3_metaWRAP_v1.1_MAG_00562   | 1,479 | O  | clpC   | ko:K03696           | AAA,AAA_2,ClpB_D2-small,Clp_N,UVR                                                          |
| GCA_016699065.1_ASM1669906v1_00465                         | 1,470 | S  | rnuC   | ko:K09760           | RnuC                                                                                       |
| RDPYD18300036_A_saliva.metaspades.bin.53_00472             | 1,453 | G  | eno    | ko:K01689           | Enolase_C,Enolase_N                                                                        |
| GCA_027492535.1_ASM2749253v1_00006                         | 1,448 | L  | orn    | ko:K13288           | RNase_T                                                                                    |
| GCA_016789655.1_ASM1678965v1_00625                         | 1,438 | L  | ligA   | ko:K01972           | BRCT,DNA_ligase_OB,DNA_ligase_ZBD,DNA_ligase_aden,HHH_2,HHH_5                              |
| RSZYD18187711_A_saliva.metaspades.bin.3_00575              | 1,438 | L  | -      | -                   | HTH_28,HTH_Tnp_1                                                                           |
| R0170300272_tooth_RAH.megahit.bin.12_00603                 | 1,425 | J  | pheS   | ko:K01889           | Phe_tRNA-synt_N,tRNA-synt_2d                                                               |
| RDPYD18189853_A_saliva.metaspades.bin.43_00249             | 1,424 | J  | rluB   | ko:K06178,ko:K06183 | PseudoU_synth_2,S4                                                                         |
| RDPYD18097619_A_saliva.metaspades.bin.8_00463              | 1,400 | S  | -      | -                   | HHH_3,Radical_SAM                                                                          |
| R0170300219_tooth_RA.megahit.bin.79_00758                  | 1,375 | E  | arcA   | ko:K01478           | Amidinotransf                                                                              |
| GCA_017512085.1_00557                                      | 1,363 | U  | secA   | ko:K03070           | Helicase_C,SEC-C,SecA_DEAD,SecA_PP_bind,SecA_SW                                            |
| R0170300266_tooth_RAH.megahit.bin.30_00008                 | 1,363 | -  | -      | -                   | -                                                                                          |
| R0170300258_tooth_RAH.megahit.bin.41_00246                 | 1,347 | O  | htpX   | ko:K03799           | Peptidase_M48                                                                              |
| R0170300241_tooth_RAH.megahit.bin.28_00028                 | 1,337 | S  | -      | -                   | bPH_2                                                                                      |
| GCA_002313515.1_ASM231351v1_00644                          | 1,333 | J  | efp    | ko:K02356           | EFP,EFP_N,Elong-fact-P_C                                                                   |
| GCA_017432225.1_00265                                      | 1,330 | K  | nusB   | ko:K03625           | NusB                                                                                       |
| GCA_947303265.1_SRR10912539_bin.36_metaWRAP_v1.3_MAG_00108 | 1,315 | G  | -      | -                   | Glyco_transf_4,Glyco_transf_5,Glycos_transf_1                                              |
| R0170300071_tooth_RA.megahit.bin.81_00038                  | 1,307 | S  | der    | ko:K03977           | KH_dom-like,MMR_HSR1                                                                       |
| RDPYD18088985_A_saliva.metaspades.bin.11_00576             | 1,300 | S  | -      | -                   | DcuC                                                                                       |
| RSZYD18078212_A_saliva.metaspades.bin.24_00041             | 1,276 | S  | obg    | ko:K03979           | GTP1_OBG,MMR_HSR1                                                                          |
| GCA_017515285.1_ASM1751528v1_00635                         | 1,274 | F  | pyrG   | ko:K01937           | CTP_synth_N,GATase                                                                         |
| GCA_016187125.1_ASM1618712v1_00518                         | 1,257 | S  | -      | ko:K06960           | KH_4                                                                                       |
| GCA_016196105.1_ASM1619610v1_00465                         | 1,253 | C  | atpA   | ko:K02111           | ATP-synt_ab,ATP-synt_ab_C,ATP-synt_ab_N                                                    |
| SZAXPI018103-24_RA_dental.metaspades.bin.40_00319          | 1,251 | S  | -      | ko:K01990           | ABC_tran,DUF4162                                                                           |
| GCA_905373795.1_SRR9217490-mag-bin.5_00836                 | 1,243 | C  | atpD   | ko:K02112           | ATP-synt_ab,ATP-synt_ab_N                                                                  |
| RSZAXPI002314-23_RAH_dental.metaspades.bin.51_00624        | 1,236 | J  | rplR   | ko:K02881           | Ribosomal_L18p                                                                             |
| GCA_905373795.1_SRR9217490-mag-bin.5_00646                 | 1,233 | K  | mraZ   | ko:K03925           | MraZ                                                                                       |
| GCA_017516075.1_ASM1751607v1_00034                         | 1,219 | J  | rpsQ   | ko:K02961           | Ribosomal_S17                                                                              |
| GCA_905371595.1_SRR9217384-mag-bin.1_00059                 | 1,214 | M  | -      | -                   | DUF1727,Mur_ligase_M                                                                       |
| SZAXPI018318-20_RA_dental.metaspades.bin.38_00435          | 1,212 | J  | trmD   | ko:K00554           | tRNA_m1G_MT                                                                                |
| SZAXPI018092-13_RA_dental.metaspades.bin.61_00229          | 1,207 | G  | rpiB   | ko:K01808           | LacAB_rpiB                                                                                 |
| YS000376_saliva.spades.bin.26_00330                        | 1,207 | G  | fba    | ko:K01624           | F_bP_aldolase                                                                              |
| RDPYD18189913_A_saliva.metaspades.bin.17_00238             | 1,203 | O  | hspA-1 | ko:K13993           | HSP20                                                                                      |
| RSZYD18187345_A_saliva.metaspades.bin.42_00430             | 1,195 | K  | greA   | ko:K03624           | GreA_GreB,GreA_GreB_N                                                                      |
| GCA_027311865.1_ASM2731186v1_00429                         | 1,187 | H  | uppS   | ko:K00806           | Prenyltransf                                                                               |
| RSZAXPI002308-17_RAH_dental.metaspades.bin.14_00532        | 1,184 | K  | rpoA   | ko:K03040           | RNA_pol_A_CTD,RNA_pol_A_bac,RNA_pol_L                                                      |
| GCA_025450135.1_ASM2545013v1_00521                         | 1,181 | J  | trpS   | ko:K01867           | tRNA-synt_1b                                                                               |
| R0170300060_tooth_RA.megahit.bin.92_00161                  | 1,170 | C  | mez_1  | ko:K00027           | Malic_M,malic                                                                              |
| R0170300181_tooth_RA.megahit.bin.83_00169                  | 1,167 | O  | -      | -                   | Band_7                                                                                     |
| GCA_018060465.1_ASM1806046v1_00021                         | 1,154 | M  | murC   | -                   | Mur_ligase,Mur_ligase_C,Mur_ligase_M                                                       |
| GCA_002413755.1_ASM241375v1_00800                          | 1,148 | J  | rpsI   | ko:K02996           | Ribosomal_S9                                                                               |
| GCA_002371235.1_ASM237123v1_00198                          | 1,145 | J  | alaS   | ko:K01872           | DHHA1,tRNA-synt_2c,tRNA_SAD                                                                |
| RDPYD18098935_A_saliva.metaspades.bin.23_00319             | 1,144 | J  | rplC   | ko:K02906           | Ribosomal_L3                                                                               |
| GCA_016178135.1_ASM1617813v1_00284                         | 1,143 | G  | -      | ko:K00615           | Transketolase_N                                                                            |
| RSZAXPI002603-21_RA_dental.metaspades.bin.63_00512         | 1,140 | E  | glyA   | ko:K00600           | SHMT                                                                                       |
| GCA_018001155.1_ASM1800115v1_00771                         | 1,129 | J  | tyrS   | ko:K01866           | S4,tRNA-synt_1b                                                                            |
| GCA_945873065.1_SRR15732359_bin.18_metaWRAP_v1.3_MAG_00639 | 1,124 | K  | -      | ko:K10947           | PadR                                                                                       |
| RSZYD18078259_A_saliva.metaspades.bin.16_00103             | 1,124 | G  | pyk    | ko:K00873           | PK,PK_C                                                                                    |
| SZAXPI018488-20_RA_saliva.metaspades.bin.49_00010          | 1,100 | V  | -      | ko:K06147           | ABC_membrane,ABC_tran                                                                      |
| GCA_009691435.1_ASM969143v1_00108                          | 1,093 | J  | rpsR   | ko:K02963           | Ribosomal_S18                                                                              |

|                                                              |       |    |         |                     |                                                  |
|--------------------------------------------------------------|-------|----|---------|---------------------|--------------------------------------------------|
| GCA_947097435.1_SRR8786267_bin.5_metaWRAP_v1.3_MAG_00049     | 1,088 | O  | smpB    | ko:K03664           | SmpB                                             |
| R0170300305_tooth_RAH.megahit.bin.5_00147                    | 1,085 | J  | metG    | ko:K01874           | Anticodon_1,tRNA-synt_1g,tRNA_bind               |
| RSZYD18187169_A_saliva.metaspades.bin.33_00117               | 1,083 | J  | gltX    | ko:K01885,ko:K09698 | tRNA-synt_1c                                     |
| RSZAXPI002318-27_RAH_dental.metaspades.bin.13_00592          | 1,074 | L  | dnaA    | ko:K02313           | Bac_DnaA,Bac_DnaA_C,DnaA_N                       |
| RSZYD18187907_A_saliva.metaspades.bin.32_00101               | 1,074 | L  | polA    | ko:K02335           | 5_3_exonuc,5_3_exonuc_N,DNA_pol_A,DNA_pol_A_exo1 |
| GCA_000503915.1_ASM50391v1_00237                             | 1,070 | V  | -       | ko:K01990           | ABC_tran                                         |
| RSZAXPI002629-81_RA_dental.metaspades.bin.76_00285           | 1,070 | J  | ksgA    | ko:K02528           | RnaAD                                            |
| RSZYD18187874_A_saliva.metaspades.bin.29_00652               | 1,063 | S  | -       | ko:K09117           | YqeY                                             |
| R0170300319_tooth_RAH.megahit.bin.124_00812                  | 1,056 | L  | -       | ko:K09747           | YbaB_DNA_bd                                      |
| SZAXPI018172-26_RA_dental.metaspades.bin.32_00650            | 1,042 | D  | ftsA    | ko:K03590           | FtsA,SHS2_FTSA                                   |
| SZAXPI018171-25_1_RA_dental.metaspades.bin.52_00389          | 1,038 | O  | -       | -                   | Glutaredoxin                                     |
| RSZAXPI002321-33_RAH_dental.metaspades.bin.29_00099          | 1,037 | J  | rpmB    | ko:K02902           | Ribosomal_L28                                    |
| SZAXPI018285-113_RA_dental.metaspades.bin.57_00829           | 1,034 | D  | spolIIE | ko:K03466           | FtsK_4TM,FtsK_SpolIIE,Ftsk_gamma                 |
| GCA_946482575.1_SRR14536435_bin.26_metawrap_v1.3.0_MAG_00669 | 1,032 | J  | rpmA    | ko:K02899           | Ribosomal_L27                                    |
| RSZYD18078736_A_saliva.metaspades.bin.17_00672               | 1,031 | V  | -       | ko:K02003           | ABC_tran                                         |
| GCA_002404315.1_ASM240431v1_00465                            | 1,031 | F  | pgk     | ko:K00927           | PGK                                              |
| RSZYD18078076_A_saliva.metaspades.bin.41_00212               | 1,030 | F  | nrdA    | ko:K00525           | ATP-cone,Ribonuc_red_IgC,Ribonuc_red_IgN         |
| RDPYD18300059_A_saliva.metaspades.bin.13_00157               | 1,029 | F  | gmk     | ko:K00942           | Guanylate_kin                                    |
| GCA_946530965.1_SRR873598_bin.145_metaWRAP_v1.3_MAG_00044    | 1,023 | K  | phoB    | ko:K07657           | Response_reg,Trans_reg_C                         |
| GCA_018060465.1_ASM1806046v1_00419                           | 1,011 | L  | recJ    | ko:K07462           | DHH,DHHA1                                        |
| SZAXPI018406-56_RA_saliva.metaspades.bin.71_00619            | 1,011 | J  | trmH    | ko:K00556           | SpoU_methylase                                   |
| GCA_947304155.1_SRR10912535_bin.54_metaWRAP_v1.3_MAG_00432   | 1,007 | S  | lemA    | ko:K03744           | LemA                                             |
| GCA_003022365.1_ASM302236v1_00072                            | 1,003 | S  | -       | -                   | -                                                |
| R0170300061_tooth_RA.megahit.bin.113_00227                   | 1,002 | C  | atpG    | ko:K02115           | ATP-synt                                         |
| GCA_002404315.1_ASM240431v1_00773                            | 1,001 | GM | rgpC    | ko:K01992           | ABC2_membrane                                    |
| GCA_017516075.1_ASM1751607v1_00868                           | 999   | K  | hrcA    | ko:K03705           | HrcA,HrcA_DNA-bdg                                |
| GCA_002404125.1_ASM240412v1_00386                            | 996   | C  | -       | ko:K00384           | Glutaredoxin,Pyr_redox_2                         |
| GCA_022819365.1_ASM2281936v1_00168                           | 992   | F  | folD    | ko:K01491           | THF_DHG_CYH,THF_DHG_CYH_C                        |
| GCA_002413835.1_ASM241383v1_00895                            | 982   | J  | infC    | ko:K02520           | IF3_C,IF3_N                                      |
| GCA_947306055.1_SRR10912535_bin.62_metaWRAP_v1.3_MAG_00097   | 980   | J  | rpsF    | ko:K02990           | Ribosomal_S6                                     |
| GCA_947306055.1_SRR10912535_bin.62_metaWRAP_v1.3_MAG_00364   | 977   | K  | yebC    | -                   | Transcrip_reg                                    |
| GCA_009785095.1_ASM978509v1_00788                            | 976   | J  | infB    | ko:K02519           | GTP_EFTU,IF-2,IF2_N                              |
| RSZYD18187261_A_saliva.metaspades.bin.68_00287               | 971   | L  | recR    | ko:K06187           | HHH,RecR,Toprim_4                                |
| R0170300062_tooth_RA.megahit.bin.61_00627                    | 969   | S  | rnj     | ko:K12574           | Lactamase_B,RMMBL                                |
| GCA_002427805.1_ASM242780v1_00612                            | 967   | S  | mipA    | -                   | Peptidase_M16,Peptidase_M16_C                    |
| RDPYD18300328_A_saliva.metaspades.bin.32_00532               | 962   | C  | atpE    | ko:K02110           | ATP-synt_C                                       |
| GCA_010202265.1_ASM1020226v1_00587                           | 953   | O  | -       | ko:K04069           | Fer4_12,Fer4_14,Radical_SAM                      |
| GCA_016700355.1_ASM1670035v1_00113                           | 952   | T  | phoB    | ko:K07657           | Response_reg,Trans_reg_C                         |
| GCA_027492635.1_ASM2749263v1_00568                           | 951   | O  | comM    | ko:K06400,ko:K07391 | ChII,Mg_chelatase,Mg_chelatase_C                 |
| RSZYD18078104_A_saliva.metaspades.bin.107_00356              | 951   | F  | rimK    | ko:K05844           | RimK,Zn_protease                                 |
| R0170300203_tooth_RA.megahit.bin.94_00092                    | 946   | F  | nrdD    | ko:K21636           | ATP-cone,Glutaredoxin,NRDD                       |
| SZAXPI018286-123_RA_dental.metaspades.bin.45_00019           | 943   | F  | tmk     | ko:K00943           | Thymidylate_kin                                  |
| GCA_009785095.1_ASM978509v1_00136                            | 942   | J  | rplV    | ko:K02890           | Ribosomal_L22                                    |
| RSZYD18187823_A_saliva.metaspades.bin.19_00356               | 942   | S  | -       | ko:K09799           | DUF475                                           |
| GCA_946890805.1_SRR12830918_bin.6_metaWRAP_v1.3_MAG_00186    | 934   | J  | thrS    | ko:K01868           | HGTP_anticodon,tRNA-synt_2b,tRNA_SAD             |
| GCA_007845265.1_ASM784526v1_00527                            | 931   | C  | atpB    | ko:K02108           | ATP-synt_A                                       |
| GCA_013333625.2_ASM1333362v2_00435                           | 920   | S  | -       | ko:K08972           | Phage_holin_4_2                                  |
| R0170300198_tooth_RA.megahit.bin.28_00361                    | 918   | M  | mscL    | ko:K03282           | MscL                                             |
| GCA_016196195.1_ASM1619619v1_00546                           | 904   | J  | rpsP    | ko:K02959           | Ribosomal_S16                                    |
| GCA_904425485.1_PRJEB35131-2_00793                           | 891   | O  | groS    | ko:K04078           | Cpn10                                            |
| GCA_016699935.1_ASM1669993v1_00038                           | 889   | J  | tgt     | ko:K00773           | TGT                                              |
| R0170300119_tooth_RA.megahit.bin.12_00036                    | 885   | G  | -       | ko:K07405           | Glyco_hydro_57                                   |
| RSZYD18187801_A_saliva.metaspades.bin.75_00147               | 880   | M  | galE    | ko:K01784           | Epimerase,GDP_Man_Dehyd                          |
| GCA_027340655.1_ASM2734065v1_00438                           | 878   | J  | proS    | ko:K01881           | HGTP_anticodon,tRNA-synt_2b,tRNA_edit            |
| GCA_004100265.1_ASM410026v1_00138                            | 872   | M  | murE    | ko:K01928           | Mur_ligase,Mur_ligase_C,Mur_ligase_M             |
| GCA_013099015.1_ASM1309901v1_00790                           | 871   | K  | hrcA    | ko:K03705           | HrcA,HrcA_DNA-bdg                                |
| GCA_945873065.1_SRR15732359_bin.18_metaWRAP_v1.3_MAG_00541   | 852   | LU | dprA    | ko:K04096           | DNA_processg_A                                   |
| GCA_020428525.1_ASM2042852v1_00346                           | 849   | J  | rplQ    | ko:K02879           | Ribosomal_L17                                    |
| GCA_013099015.1_ASM1309901v1_00401                           | 849   | P  | ctpE    | ko:K12952           | E1-E2_ATPase,Hydrolase                           |
| GCA_027311865.1_ASM2731186v1_00104                           | 837   | D  | soj     | ko:K03496           | AAA_31                                           |
| GCA_947246665.1_SRR14920969_bin.19_metawrap_v1.3_MAG_00005   | 833   | J  | leuS    | ko:K01869           | Anticodon_1,tRNA-synt_1,tRNA-synt_1_2            |
| R0170300092_tooth_RA.megahit.bin.51_00432                    | 814   | S  | -       | -                   | Lactamase_B_3                                    |
| GCA_012965045.1_ASM1296504v1_00630                           | 807   | NU | epsE    | ko:K02454,ko:K02652 | T2SSE,T2SSE_N                                    |
| GCA_009787015.1_ASM978701v1_00448                            | 803   | G  | -       | ko:K00615           | Transket_pyr,Transketolase_C                     |
| GCA_002441145.1_ASM244114v1_00235                            | 798   | T  | -       | -                   | Hydrolase_3,PMM                                  |
| SZAXPI018280-95_RA_dental.metaspades.bin.36_00272            | 796   | D  | tig     | ko:K03545           | FKBP_C,Rho_N,Trigger_C,Trigger_N                 |
| GCA_017404515.1_00489                                        | 792   | J  | gatA    | ko:K02433           | Amidase                                          |
| SZAXPI018284-111_RA_dental.metaspades.bin.3_00096            | 792   | J  | gltX    | ko:K01885           | tRNA-synt_1c                                     |
| GCA_009787015.1_ASM978701v1_00493                            | 785   | O  | dnaJ    | ko:K03686           | DnaJ,DnaJ_C,DnaJ_CXXCXGXG                        |
| RSZAXPI002323-35_RAH_dental.metaspades.bin.28_00936          | 782   | S  | nrmA    | ko:K06881           | DHH,DHHA1                                        |
| R0170300258_tooth_RAH.megahit.bin.41_00934                   | 780   | S  | yerB    | -                   | DUF3048,DUF3048_C                                |
| R0170300252_tooth_RAH.megahit.bin.91_00245                   | 772   | J  | -       | ko:K06442           | FtsJ,S4                                          |
| GCA_001897295.1_ASM189729v1_00656                            | 764   | J  | def     | ko:K01462           | Pep_deformylase                                  |
| GCA_016700015.1_ASM1670001v1_00585                           | 761   | L  | xth     | ko:K01142           | Exo_endo_phos                                    |
| R0170300062_tooth_RA.megahit.bin.52_00107                    | 760   | V  | -       | ko:K06147,ko:K12531 | ABC_membrane,ABC_tran                            |
| RSZYD18078343_A_saliva.metaspades.bin.34_00005               | 755   | M  | murA    | ko:K00790           | EPSP_synthase,HTH_3                              |

|                                                              |     |    |       |                      |                                                                |
|--------------------------------------------------------------|-----|----|-------|----------------------|----------------------------------------------------------------|
| RSZAXPI002316-25_RAH_dental.metaspades.bin.26_00063          | 736 | L  | xth   | ko:K01142            | Exo_endo_phos                                                  |
| RSZYD18078259_A_saliva.metaspades.bin.22_00237               | 735 | K  | rpoA  | ko:K03040            | RNA_pol_A_CTD, RNA_pol_A_bac, RNA_pol_L                        |
| GCA_022842995.1_ASM2284299v1_00433                           | 731 | K  | -     | ko:K07665            | Response_reg, Trans_reg_C                                      |
| GCA_002427805.1_ASM242780v1_00018                            | 729 | L  | sbcB  | ko:K01141            | Exonuc_X-T_C, RNase_T                                          |
| RDPYD18189879_A_saliva.metaspades.bin.66_00335               | 727 | S  | cobQ2 | ko:K07009            | GATase_3                                                       |
| GCA_002304695.1_ASM230469v1_00215                            | 722 | S  | -     | -                    | Peptidase_M16, Peptidase_M16_C                                 |
| GCA_017512085.1_00612                                        | 719 | K  | nusA  | ko:K02600            | KH_5, NusA_N, S1                                               |
| R0170300100_tooth_RA.megahit.bin.107_00534                   | 719 | FG | hit   | -                    | HIT                                                            |
| GCA_946548715.1_SRR1222429_bin.13_metaWRAP_v1.3_MAG_00407    | 718 | J  | gatA  | ko:K02433            | Amidase                                                        |
| GCA_017516075.1_ASM1751607v1_00027                           | 717 | J  | rplC  | ko:K02906            | Ribosomal_L3                                                   |
| GCA_016187125.1_ASM1618712v1_00766                           | 705 | L  | -     | ko:K21929            | UDG                                                            |
| GCA_003164595.1_20120700_S1D_00918                           | 703 | S  | trpF  | ko:K09767            | DUF520                                                         |
| GCA_002441585.1_ASM244158v1_00637                            | 700 | G  | pykF  | ko:K00873            | PEP-utilizers, PK, PK_C                                        |
| GCA_026707815.1_ASM2670781v1_00588                           | 688 | J  | rplQ  | ko:K02879            | Ribosomal_L17                                                  |
| GCA_027426875.1_ASM2742687v1_00618                           | 682 | M  | rfaA  | ko:K00973            | NTP_transferase                                                |
| GCA_017406595.1_00476                                        | 680 | J  | dus   | -                    | Dus                                                            |
| GCA_943354985.1_Jr-19feb18-57_00370                          | 676 | J  | rpsR  | ko:K02963            | Ribosomal_S18                                                  |
| R0170300197_tooth_RA.megahit.bin.71_00097                    | 675 | O  | yeaZ  | ko:K14742            | Peptidase_M22                                                  |
| GCA_027351585.1_ASM2735158v1_00142                           | 669 | J  | rpsL  | ko:K02996            | Ribosomal_S9                                                   |
| SZAXPI018178-34_RA_dental.metaspades.bin.52_00627            | 666 | J  | hisS  | ko:K01892            | HGTP_anticodon, tRNA-synt_His                                  |
| GCA_025924835.1_ASM2592483v1_00107                           | 661 | K  | nusA  | ko:K02600            | KH_5, NusA_N, S1                                               |
| RSZAXPI002314-23_RAH_dental.metaspades.bin.46_00184          | 655 | G  | -     | ko:K07405            | Glyco_hydro_57                                                 |
| GCA_001790515.1_ASM179051v1_00194                            | 648 | J  | truB  | ko:K03177            | TruB_C_2, TruB_N                                               |
| GCA_027366415.1_ASM2736641v1_00161                           | 647 | J  | thrS  | ko:K01868            | HGTP_anticodon, tRNA-synt_2b, tRNA_SAD                         |
| GCA_026395375.1_ASM2639537v1_00777                           | 645 | U  | secA  | ko:K03070            | SEC-C, SecA_DEAD, SecA_PP_bind, SecA_SW                        |
| GCA_023257815.1_ASM2325781v1_00659                           | 634 | L  | -     | -                    | PIF1                                                           |
| GCA_027366415.1_ASM2736641v1_00891                           | 629 | J  | efp   | ko:K02356            | EFP, EFP_N, Elong-fact-P_C                                     |
| GCA_003508055.1_ASM350805v1_01085                            | 623 | L  | radC  | ko:K03630            | RadC                                                           |
| GCA_017992295.1_ASM1799229v1_00668                           | 621 | J  | rplR  | ko:K02881            | Ribosomal_L18p                                                 |
| GCA_947303945.1_SRR10912540_bin.27_metaWRAP_v1.3_MAG_01045   | 615 | O  | -     | ko:K03696            | AAA, AAA_2, ClpB_D2-small, Clp_N, UVR                          |
| R0170300181_tooth_RA.megahit.bin.83_00512                    | 610 | M  | rfaB  | ko:K01710            | GDP_Man_Dehyd                                                  |
| GCA_009785095.1_ASM978509v1_00014                            | 609 | J  | tsaD  | ko:K01409            | Peptidase_M22                                                  |
| RDPYD18300059_A_saliva.metaspades.bin.13_00688               | 603 | J  | -     | ko:K03217            | 60KD_IMP                                                       |
| GCA_007845485.1_ASM784548v1_00909                            | 598 | S  | -     | ko:K06158            | ABC_tran, ABC_tran_CTD, ABC_tran_Xtn                           |
| GCA_025349965.1_ASM2534996v1_00386                           | 591 | J  | rplV  | ko:K02890            | Ribosomal_L22                                                  |
| GCA_009783235.1_ASM978323v1_00613                            | 590 | J  | rplO  | ko:K02876            | Ribosomal_L27A                                                 |
| GCA_015999875.1_ASM1599987v1_00449                           | 581 | C  | atpC  | ko:K02114            | ATP-synt_DE, ATP-synt_DE_N                                     |
| GCA_009787245.1_ASM978724v1_00532                            | 563 | L  | priA  | ko:K04066            | DEAD, Helicase_C, ResIII                                       |
| GCA_017512045.1_00297                                        | 561 | H  | coaE  | ko:K00859, ko:K05378 | CoaE                                                           |
| GCA_017515205.1_ASM1751520v1_00649                           | 560 | L  | xseA  | ko:K03601            | Exonuc_VII_L, tRNA_anti_2                                      |
| GCA_947364605.1_SRR16350204_bin.1_metawrap_v1.3_MAG_00362    | 559 | H  | coaE  | ko:K00859, ko:K05378 | CoaE                                                           |
| GCA_017515105.1_ASM1751510v1_00126                           | 556 | S  | rnj   | ko:K12574            | Lactamase_B, RMMBL                                             |
| GCA_002404125.1_ASM240412v1_00571                            | 544 | L  | fpg   | ko:K10563            | Fapy_DNA_glyco, H2TH, zf-FPG_IleRS                             |
| GCA_017432705.1_00360                                        | 543 | L  | -     | ko:K03111            | SSB                                                            |
| GCA_904425485.1_PRJEB35131-2_00717                           | 541 | J  | miaA  | ko:K00791            | IPPT                                                           |
| R0170300223_tooth_RA.megahit.bin.80_00533                    | 529 | J  | gatC  | ko:K02435            | Glu-tRNA_Gln                                                   |
| R0170300282_tooth_RAH.megahit.bin.3_00662                    | 528 | L  | -     | -                    | UDG                                                            |
| RSZAXPI002636-95_RA_dental.metaspades.bin.34_00380           | 524 | L  | -     | ko:K09747            | YbaB_DNA_bd                                                    |
| RSZYD18078100_A_saliva.metaspades.bin.89_00571               | 503 | J  | rlmH  | ko:K00783            | SPOUT_MTase                                                    |
| R0170300211_tooth_RA.megahit.bin.13_00563                    | 493 | M  | -     | ko:K00963            | NTP_transferase                                                |
| GCA_947364965.1_SRR16350202_bin.8_metawrap_v1.3_MAG_00016    | 492 | S  | -     | -                    | PMM                                                            |
| GCA_947428935.1_SRR19981124_bin.14_metawrap_v1.3_MAG_00236   | 492 | NU | pilM  | ko:K02662            | PilM_2                                                         |
| GCA_016196105.1_ASM1619610v1_00323                           | 491 | S  | jag   | ko:K06346            | Jag_N, KH_4, R3H                                               |
| R0170300229_tooth_RA.megahit.bin.48_00577                    | 484 | S  | -     | ko:K06346            | Jag_N, KH_4, R3H                                               |
| R0170300325_tooth_RA.megahit.bin.68_00862                    | 477 | M  | -     | -                    | Glyco_transf_4, Glycos_transf_1                                |
| GCA_945873065.1_SRR15732359_bin.18_metaWRAP_v1.3_MAG_00407   | 474 | J  | gatC  | ko:K02435            | Glu-tRNA_Gln                                                   |
| GCA_009785095.1_ASM978509v1_00094                            | 468 | C  | atpC  | ko:K02114            | ATP-synt_DE, ATP-synt_DE_N                                     |
| GCA_018001155.1_ASM1800115v1_00275                           | 457 | O  | radA  | ko:K04485            | AAA_25, ATPase, ChII, Lon_C                                    |
| GCA_017404685.1_00168                                        | 453 | O  | trxA2 | -                    | Thioredoxin                                                    |
| R0170300239_tooth_RAH.megahit.bin.85_00040                   | 452 | J  | tyrS  | ko:K01866            | S4, tRNA-synt_1b                                               |
| GCA_946480535.1_SRR14536364_bin.32_metawrap_v1.3.0_MAG_00838 | 448 | M  | -     | -                    | Bac_transf, CoA_binding_3                                      |
| GCA_027492635.1_ASM2749263v1_00231                           | 446 | H  | MAT1A | ko:K00789            | S-AdoMet_synt_C, S-AdoMet_synt_M, S-AdoMet_synt_N              |
| GCA_017510845.1_00229                                        | 437 | S  | -     | ko:K06881            | DHH, DHHA1                                                     |
| GCA_943914775.1_Tcv98XDF6C_bin.50_MAG_00246                  | 434 | F  | tgt   | ko:K00773            | TGT                                                            |
| RDPYD18189966_A_saliva.metaspades.bin.40_00158               | 433 | L  | sbcB  | ko:K01141            | Exonuc_X-T_C, RNase_T                                          |
| R0170300325_tooth_RA.megahit.bin.68_00893                    | 431 | FG | hinT  | ko:K02503            | HIT                                                            |
| RSZAXPI002657-17_RA_dental.metaspades.bin.27_00522           | 428 | L  | -     | ko:K07443            | DNA_binding_1                                                  |
| GCA_017433845.1_00435                                        | 427 | M  | glmS  | ko:K00820            | GATase_6, SIS                                                  |
| GCA_002323055.1_ASM232305v1_00424                            | 426 | J  | trpS  | ko:K01867            | tRNA-synt_1b                                                   |
| GCA_904425485.1_PRJEB35131-2_00013                           | 424 | GM | -     | ko:K01990            | ABC_tran, Wzt_C                                                |
| GCA_017405225.1_00570                                        | 416 | J  | rplO  | ko:K02876            | Ribosomal_L27A                                                 |
| R0170300223_tooth_RA.megahit.bin.44_00362                    | 416 | K  | sigA  | ko:K03086            | Sigma70_r1_1, Sigma70_r1_2, Sigma70_r2, Sigma70_r3, Sigma70_r4 |
| GCA_947368805.1_SRR15431190_bin.13_metawrap_v1.3_MAG_00141   | 410 | J  | rplV  | ko:K02890            | Ribosomal_L22                                                  |
| GCA_024635495.1_ASM2463549v1_00092                           | 409 | HJ | rimK  | ko:K05844, ko:K14940 | RimK, Zn_protease                                              |
| GCA_017510845.1_00329                                        | 408 | V  | -     | ko:K02003            | ABC_tran                                                       |
| RSZYD18187492_A_saliva.metaspades.bin.15_00077               | 406 | L  | ung   | ko:K03648            | UDG                                                            |



|                                                            |     |    |      |                               |                                                                            |
|------------------------------------------------------------|-----|----|------|-------------------------------|----------------------------------------------------------------------------|
| GCA_002699225.1_ASM269922v1_00164                          | 405 | J  | ctc  | ko:K02897                     | Ribosomal_L25p,Ribosomal_TL5_C                                             |
| SZAXPI018092-13_RA_dental.metaspades.bin.61_00015          | 404 | S  | -    | -                             | Peptidase_M50                                                              |
| GCA_016187125.1_ASM1618712v1_00457                         | 402 | L  | -    | ko:K07478                     | AAA,AAA_assoc_2,MgsA_C                                                     |
| GCA_017512085.1_00192                                      | 398 | O  | groS | ko:K04078                     | Cpn10                                                                      |
| GCA_009778675.1_ASM977867v1_00212                          | 398 | S  | -    | ko:K06881                     | DHH,DHHA1                                                                  |
| GCA_947425855.1_SRR19981115_bin.7_metawrap_v1.3_MAG_00313  | 395 | V  | -    | -                             | FemAB                                                                      |
| GCA_017651125.1_ASM1765112v1_00219                         | 387 | J  | infC | ko:K02520                     | IF3_C,IF3_N                                                                |
| GCA_017510205.1_00144                                      | 386 | J  | cysS | ko:K01883                     | DALR_2,tRNA-synt_1e                                                        |
| GCA_003523165.1_ASM352316v1_00863                          | 380 | M  | rseP | ko:K04771,ko:K11749,ko:K16922 | PDZ,PDZ_2,Peptidase_M50                                                    |
| RSZYD18078756_A_saliva.metaspades.bin.24_00627             | 373 | L  | topA | ko:K03168                     | Topoisom_bac,Toprim,Toprim_C_rpt                                           |
| R0170300078_tooth_RA.megahit.bin.29_00402                  | 371 | V  | -    | ko:K06147,ko:K12531           | ABC_membrane,ABC_tran                                                      |
| R0170300287_tooth_RAH.megahit.bin.57_00700                 | 361 | S  | lemA | ko:K03744                     | LemA                                                                       |
| R0170300160_tooth_RA.megahit.bin.83_00581                  | 357 | M  | ydiB | ko:K06925                     | TsaE                                                                       |
| GCA_002344715.1_ASM234471v1_00996                          | 357 | J  | rplC | ko:K02906                     | Ribosomal_L3                                                               |
| GCA_019352195.1_ASM1935219v1_01114                         | 356 | K  | nrdR | ko:K07738                     | ATP-cone                                                                   |
| GCA_947429355.1_SRR19981115_bin.23_metawrap_v1.3_MAG_00026 | 355 | U  | -    | -                             | AAA_10,DUF87,PrgI                                                          |
| R0170300198_tooth_RA.megahit.bin.28_00098                  | 351 | S  | -    | ko:K21600                     | Trns_repr_metal                                                            |
| GCA_946530965.1_SRR873598_bin.145_metaWRAP_v1.3_MAG_00482  | 350 | L  | xth  | ko:K01142                     | Exo_endo_phos                                                              |
| GCA_946222005.1_ZZEVbxAOO_bin.25.MAG_00954                 | 350 | S  | -    | -                             | ABC_tran,ABC_tran_CTD,ABC_tran_Xtn                                         |
| GCA_017459705.1_00440                                      | 348 | J  | rpmH | ko:K02914                     | Ribosomal_L34                                                              |
| GCA_009776375.1_ASM977637v1_00587                          | 347 | J  | rplD | ko:K02926                     | Ribosomal_L4                                                               |
| SZAXPI018287-129_RA_dental.metaspades.bin.24_00823         | 347 | J  | -    | -                             | SpoU_methylase                                                             |
| GCA_017516075.1_ASM1751607v1_00354                         | 341 | J  | trmD | ko:K00554                     | Methyltrn_RNA_4,tRNA_m1G_MT                                                |
| GCA_025349965.1_ASM2534996v1_00723                         | 340 | J  | infC | ko:K02520                     | IF3_C,IF3_N                                                                |
| GCA_946407955.1_SRR12081294_bin.80_metaWRAP_v1.3_MAG_00483 | 336 | J  | rpmB | ko:K02902                     | Ribosomal_L28                                                              |
| GCA_016283505.1_ASM1628350v1_00554                         | 332 | M  | galE | ko:K01784                     | Epimerase,GDP_Man_Dehyd                                                    |
| GCA_018062785.1_ASM1806278v1_00384                         | 324 | K  | rpoC | ko:K03046                     | RNA_pol_Rpb1_1,RNA_pol_Rpb1_2,RNA_pol_Rpb1_3,RNA_pol_Rpb1_4,RNA_pol_Rpb1_5 |
| R0170300298_tooth_RAH.megahit.bin.126_00041                | 322 | -  | -    | -                             | -                                                                          |
| GCA_905373835.1_SRR9217492-mag-bin.7_00176                 | 319 | M  | murE | ko:K01928                     | Mur_ligase,Mur_ligase_C,Mur_ligase_M                                       |
| GCA_009783305.1_ASM978330v1_00191                          | 317 | K  | nusB | ko:K03625                     | NusB                                                                       |
| GCA_947425995.1_SRR19981123_bin.1_metawrap_v1.3_MAG_00392  | 316 | H  | coaE | ko:K00859,ko:K05378           | CoaE                                                                       |
| GCA_017432365.1_00508                                      | 314 | E  | -    | ko:K04487                     | Aminotran_5                                                                |
| GCA_027365555.1_ASM2736555v1_00457                         | 313 | C  | -    | ko:K00384                     | Glutaredoxin,Pyr_redox_2                                                   |
| GCA_013289705.1_ASM1328970v1_01058                         | 311 | J  | lysS | ko:K04567                     | tRNA-synt_2,tRNA_anti-codon,tRNA_bind                                      |
| RSZYD18187458_A_saliva.metaspades.bin.36_00586             | 309 | J  | trpS | ko:K01867                     | tRNA-synt_1b                                                               |
| SZAXPI018406-56_RA_saliva.metaspades.bin.71_00434          | 305 | J  | rplX | ko:K02895                     | KOW,ribosomal_L24                                                          |
| GCA_027492735.1_ASM2749273v1_00249                         | 302 | J  | argS | ko:K01887                     | Arg_tRNA_synt_N,DALR_1,tRNA-synt_1d                                        |
| GCA_002404195.1_ASM240419v1_00392                          | 302 | NU | -    | ko:K02653                     | T2SSF                                                                      |
| GCA_027428095.1_ASM2742809v1_00456                         | 301 | M  | -    | ko:K00963                     | NTP_transferase                                                            |
| GCA_019352195.1_ASM1935219v1_00293                         | 300 | S  | -    | -                             | -                                                                          |
| SZAXPI018273-75_RA_dental.metaspades.bin.34_00249          | 299 | O  | -    | ko:K04771                     | PDZ_2,Trypsin_2                                                            |
| GCA_017509895.1_00092                                      | 298 | V  | -    | ko:K01187,ko:K21574           | GH97_C,GH97_N,Glyco_hydro_97                                               |
| GCA_947426085.1_SRR18439536_bin.4_metawrap_v1.3_MAG_00414  | 294 | O  | -    | ko:K08070                     | PDZ_2,Trypsin_2                                                            |
| GCA_002322785.1_ASM232278v1_00582                          | 294 | L  | ruvC | ko:K01159                     | RuvC                                                                       |
| GCA_023253175.1_ASM2325317v1_00342                         | 293 | L  | -    | ko:K09747                     | YbaB_DNA_bd                                                                |
| GCA_027427715.1_ASM2742771v1_00314                         | 293 | J  | serS | ko:K01875                     | Seryl_tRNA_N,tRNA-synt_2b                                                  |
| R0170300254_tooth_RAH.megahit.bin.128_00872                | 293 | F  | eno  | ko:K01689                     | Enolase_C,Enolase_N                                                        |
| RSZAXPI002471-106_2_RAH_saliva.metaspades.bin.25_00221     | 290 | J  | rsuA | ko:K06178,ko:K06182,ko:K06183 | PseudoU_synt_2,S4                                                          |
| GCA_017405225.1_00185                                      | 288 | V  | uppP | ko:K06153                     | BacA                                                                       |
| GCA_904425485.1_PRJEB35131-2_00012                         | 282 | M  | csbB | ko:K20534                     | Glycos_transf_2                                                            |
| GCA_017510025.1_00223                                      | 278 | M  | -    | -                             | -                                                                          |
| GCA_027459325.1_ASM2745932v1_00076                         | 271 | J  | pheS | ko:K01889                     | Phe_tRNA-synt_N,tRNA-synt_2d                                               |
| GCA_001790535.1_ASM179053v1_00210                          | 270 | J  | rpsH | ko:K02994                     | Ribosomal_S8                                                               |
| SZAXPI018316-18_RA_dental.metaspades.bin.5_00354           | 270 | J  | ychF | ko:K06942                     | MMR_HSR1,YchF-GTPase_C                                                     |
| GCA_004136275.1_ASM413627v1_00019                          | 269 | S  | rnj  | ko:K12574                     | Lactamase_B,RMMBL                                                          |
| GCA_009776375.1_ASM977637v1_00595                          | 260 | J  | rpsQ | ko:K02961                     | Ribosomal_S17                                                              |
| GCA_003962975.1_ASM396297v1_00485                          | 255 | -  | -    | -                             | -                                                                          |
| GCA_001003725.1_ASM100372v1_00806                          | 254 | S  | yqjA | ko:K03975                     | SNARE_assoc                                                                |
| GCA_016700395.1_ASM1670039v1_00035                         | 247 | G  | -    | ko:K01194                     | Trehalase                                                                  |
| GCA_009776375.1_ASM977637v1_00018                          | 239 | O  | clpC | ko:K03696                     | AAA,AAA_2,ClpB_D2-small,Clp_N,UVR                                          |
| RSZAXPI002675-22_RA_dental.metaspades.bin.45_00149         | 234 | S  | -    | -                             | Fic                                                                        |
| R0170300083_tooth_RA.megahit.bin.110_00391                 | 233 | J  | ileS | ko:K01870                     | Anticodon_1,tRNA-synt_1,zf-FPG_IleRS                                       |
| RSZAXPI002330-47_RAH_dental.metaspades.bin.66_00426        | 231 | J  | def  | ko:K01462                     | Pep_deformylase                                                            |
| R0170300155_tooth_RA.megahit.bin.58_00002                  | 231 | S  | -    | -                             | Peptidase_M50                                                              |
| GCA_003246575.1_ASM324657v1_00302                          | 229 | NU | piIM | ko:K02662                     | PiIM_2                                                                     |
| YS000131_saliva.spades.bin.17_00326                        | 228 | J  | rpmB | ko:K02902                     | Ribosomal_L28                                                              |
| GCA_009778675.1_ASM977867v1_00605                          | 226 | S  | -    | ko:K06960                     | KH_4                                                                       |
| GCA_934725355.1_ERR7738173_bin.40_00526                    | 220 | J  | pheS | ko:K01889                     | Phe_tRNA-synt_N,tRNA-synt_2d                                               |
| GCA_945873065.1_SRR15732359_bin.18_metaWRAP_v1.3_MAG_00070 | 219 | M  | -    | -                             | -                                                                          |
| RSZAXPI002313-22_RAH_dental.metaspades.bin.87_00228        | 219 | J  | valS | ko:K01873                     | Anticodon_1,Val_tRNA-synt_C,tRNA-synt_1                                    |
| GCA_016187175.1_ASM1618717v1_00218                         | 219 | S  | jag  | ko:K06346                     | KH_4,R3H                                                                   |
| GCA_001790515.1_ASM179051v1_01049                          | 217 | M  | murF | ko:K01929                     | Mur_ligase,Mur_ligase_C,Mur_ligase_M                                       |
| GCA_002331045.1_ASM233104v1_00508                          | 217 | S  | -    | ko:K07146                     | Rhodanese,Rhodanese_C                                                      |
| GCA_017512225.1_00371                                      | 215 | M  | mrcB | ko:K05365                     | Transgly,Transpeptidase,UB2H                                               |
| GCA_947306835.1_SRR10912542_bin.23_metaWRAP_v1.3_MAG_00244 | 214 | T  | -    | -                             | Fe_hyd_lg_C,HATPase_c,HisKA,Response_reg                                   |
| GCA_947306055.1_SRR10912535_bin.62_metaWRAP_v1.3_MAG_00131 | 212 | J  | map  | ko:K01265                     | Peptidase_M24                                                              |

|                                                             |     |    |        |                     |                                                                                            |
|-------------------------------------------------------------|-----|----|--------|---------------------|--------------------------------------------------------------------------------------------|
| GCA_017651125.1_ASM1765112v1_00202                          | 211 | U  | -      | -                   | AAA_10,DUF87,PrgI                                                                          |
| R0170300079_tooth_RA.megahit.bin.64_00249                   | 211 | M  | -      | -                   | -                                                                                          |
| GCA_943354985.1_Jr-19feb18-57_00474                         | 207 | M  | rfbD   | ko:K00067,ko:K01790 | RmlD_sub_bind,dTDP_sugar_isom                                                              |
| GCA_017459845.1_00148                                       | 201 | J  | tyrS   | ko:K01866           | S4,tRNA-synt_1b                                                                            |
| GCA_017432425.1_00181                                       | 194 | L  | -      | -                   | DUF1524,Excalibur                                                                          |
| GCA_017432705.1_00330                                       | 194 | J  | gatB   | ko:K02434           | GatB_N,GatB_Yqey                                                                           |
| GCA_020428315.1_ASM2042831v1_00553                          | 188 | S  | lemA   | ko:K03744           | LemA                                                                                       |
| GCA_009992235.1_ASM999223v1_00264                           | 187 | M  | murE   | ko:K01928,ko:K15792 | Mur_ligase,Mur_ligase_C,Mur_ligase_M                                                       |
| R0170300260_tooth_RA.megahit.bin.16_00131                   | 185 | V  | -      | ko:K02003           | ABC_tran                                                                                   |
| GCA_003246575.1_ASM324657v1_00088                           | 182 | O  | -      | ko:K13993           | HSP20                                                                                      |
| SZAXPI018315-17_RA_dental.metaspades.bin.58_00404           | 178 | -  | -      | -                   | -                                                                                          |
| YS000721_saliva.spades.bin.7_00533                          | 173 | J  | ksgA   | ko:K02528           | RrnaAD                                                                                     |
| GCA_017404725.1_00166                                       | 172 | O  | comM   | ko:K07391           | ChII,Mg_chelatase,Mg_chelatase_C                                                           |
| GCA_016178135.1_ASM1617813v1_00562                          | 171 | D  | xerC   | ko:K03733           | Phage_int_SAM_1,Phage_integrase                                                            |
| GCA_017652765.1_ASM1765276v1_00613                          | 167 | L  | -      | ko:K03111           | SSB                                                                                        |
| GCA_017418275.1_00196                                       | 166 | U  | lepB   | ko:K03100           | Peptidase_S24                                                                              |
| R0170300071_tooth_RA.megahit.bin.81_00775                   | 165 | K  | greA   | ko:K03624           | GreA_GreB,GreA_GreB_N                                                                      |
| SZAXPI018184-41_RA_dental.metaspades.bin.37_00570           | 165 | L  | -      | -                   | UPF0020                                                                                    |
| GCA_009783235.1_ASM978323v1_00486                           | 165 | S  | cobQ2  | ko:K07009           | GATase_3                                                                                   |
| GCA_003962975.1_ASM396297v1_00220                           | 159 | J  | proS   | ko:K01881           | HGTP_anticodon,ProRS-C_1,tRNA-synt_2b,tRNA_edit                                            |
| GCA_905372225.1_SRR9217401-mag-bin.8_00166                  | 159 | S  | -      | ko:K06881           | DHH,DHHA1                                                                                  |
| GCA_007120515.1_ASM712051v1_00398                           | 157 | S  | -      | -                   | Peptidase_M50                                                                              |
| GCA_013333515.2_ASM1333351v2_00458                          | 155 | J  | truB   | ko:K03177           | TruB_C_2,TruB_N                                                                            |
| GCA_017515105.1_ASM1751510v1_00334                          | 155 | S  | yvdD_2 | ko:K06966           | Lysine_decarbox                                                                            |
| SZAXPI018317-19_RA_dental.metaspades.bin.31_00097           | 151 | O  | htpX   | ko:K03799           | Peptidase_M48                                                                              |
| GCA_017460165.1_00144                                       | 150 | L  | -      | -                   | PIF1                                                                                       |
| GCA_014377525.1_ASM1437752v1_00169                          | 150 | S  | der    | ko:K03977           | KH_dom-like,MMR_HSR1                                                                       |
| GCA_946478995.1_SRR15094062_bin.6_metawrap_v1.3.0_MAG_00498 | 148 | G  | -      | -                   | XFP,XFP_C                                                                                  |
| GCA_002313515.1_ASM231351v1_00675                           | 143 | K  | -      | -                   | -                                                                                          |
| GCA_027315225.1_ASM2731522v1_00962                          | 143 | K  | rpoB   | ko:K03043           | RNA_pol_Rpb2_1,RNA_pol_Rpb2_2,RNA_pol_Rpb2_3,RNA_pol_Rpb2_45,RNA_pol_Rpb2_6,RNA_pol_Rpb2_7 |
| GCA_017460165.1_00022                                       | 142 | L  | -      | ko:K03111           | SSB                                                                                        |
| GCA_003516025.1_ASM351602v1_00704                           | 142 | C  | atpE   | ko:K02110           | ATP-synt_C                                                                                 |
| GCA_943350085.1_RH-15aug16-19_00217                         | 140 | J  | trmD   | ko:K00554           | tRNA_m1G_MT                                                                                |
| GCA_013333515.2_ASM1333351v2_00178                          | 133 | F  | -      | -                   | NUDIX                                                                                      |
| SZAXPI018291-142_RA_dental.metaspades.bin.37_00475          | 132 | O  | -      | ko:K07391           | ChII,Mg_chelatase,Mg_chelatase_C                                                           |
| GCA_946890795.1_SRR12830924_bin.6_metaWRAP_v1.3_MAG_00323   | 132 | L  | xseA   | ko:K03601,ko:K03797 | Exonuc_VII_L,tRNA_anti_2                                                                   |
| RSZAXPI002604-26_RA_dental.metaspades.bin.30_00628          | 132 | J  | rplO   | ko:K02876           | Ribosomal_L27A                                                                             |
| GCA_009776375.1_ASM977637v1_00702                           | 131 | J  | cysS   | ko:K01883           | DALR_2,tRNA-synt_1e                                                                        |
| GCA_026395405.1_ASM2639540v1_00267                          | 129 | E  | arcD   | ko:K03758           | AA_permease_2                                                                              |
| GCA_017509895.1_00506                                       | 128 | J  | rpsF   | ko:K02990           | Ribosomal_S6                                                                               |
| GCA_946530965.1_SRR873598_bin.145_metaWRAP_v1.3_MAG_00602   | 126 | M  | mscL   | ko:K03282           | MscL                                                                                       |
| GCA_934725355.1_ERR7738173_bin.40_00215                     | 125 | M  | ftsI   | ko:K03587,ko:K08384 | PASTA,PBP_dimer,Transpeptidase                                                             |
| GCA_017421325.1_00368                                       | 124 | J  | rsmH   | ko:K03438           | Methyltransf_5                                                                             |
| GCA_017510205.1_00499                                       | 124 | S  | obg    | ko:K03979           | GTP1_OBG,MMR_HSR1                                                                          |
| R0170300253_tooth_RA.megahit.bin.35_00705                   | 122 | J  | infA   | ko:K02518           | eIF-1a                                                                                     |
| RSZAXPI002315-24_RA_dental.metaspades.bin.39_00015          | 121 | L  | -      | -                   | NYN                                                                                        |
| GCA_016699895.1_ASM1669989v1_00642                          | 118 | L  | -      | ko:K08316           | Cons_hypoth95                                                                              |
| GCA_009787015.1_ASM978701v1_00664                           | 118 | E  | -      | ko:K04487           | Aminotran_5                                                                                |
| GCA_001790435.1_ASM179043v1_00040                           | 115 | T  | phoR   | ko:K07636           | HAMP,HATPase_c,HisKA,PAS,PAS_4,PAS_8,sCache_like                                           |
| RSZYD18078325_A_saliva.metaspades.bin.95_00001              | 110 | S  | -      | -                   | -                                                                                          |
| GCA_002839415.1_ASM283941v1_00211                           | 97  | M  | ctpA   | ko:K03797           | PDZ,PDZ_2,PG_binding_1,Peptidase_S41                                                       |
| GCA_017613135.1_ASM1761313v1_00416                          | 95  | J  | truB   | ko:K03177           | TruB-C_2,TruB_C_2,TruB_N                                                                   |
| GCA_001790515.1_ASM179051v1_01235                           | 93  | L  | mutY   | ko:K03575           | EndIII_4Fe-2S,HhH-GPD,NUDIX_4                                                              |
| GCA_025924835.1_ASM2592483v1_00297                          | 93  | J  | lysS   | ko:K04567           | tRNA-synt_2,tRNA_anti-codon,tRNA_bind                                                      |
| SZAXPI018287-129_RA_dental.metaspades.bin.24_00267          | 92  | G  | gpmA   | ko:K01834           | His_Phos_1                                                                                 |
| GCA_013334475.1_ASM1333447v1_00551                          | 91  | F  | dut    | ko:K01520           | dUTPase                                                                                    |
| GCA_027356525.1_ASM2735652v1_00525                          | 90  | J  | rpmH   | ko:K02914           | Ribosomal_L34                                                                              |
| GCA_002441145.1_ASM244114v1_00124                           | 89  | J  | -      | ko:K07447           | RuvX                                                                                       |
| GCA_017515285.1_ASM1751528v1_00865                          | 88  | M  | -      | -                   | Glyco_transf_4,Glycos_transf_1                                                             |
| RSZAXPI002627-75_RA_dental.metaspades.bin.25_00739          | 88  | S  | recX   | ko:K03565           | RecX                                                                                       |
| RSZAXPI002326-41_RA_dental.metaspades.bin.24_00483          | 86  | J  | gltX   | ko:K01885,ko:K09698 | tRNA-synt_1c                                                                               |
| SZAXPI018178-34_RA_dental.metaspades.bin.62_00516           | 86  | L  | xseA   | ko:K03601,ko:K03797 | Exonuc_VII_L,tRNA_anti_2                                                                   |
| GCA_017509895.1_00637                                       | 80  | G  | RPE1   | ko:K01783           | Ribul_P_3_epim                                                                             |
| GCA_025349965.1_ASM2534996v1_00336                          | 75  | NU | -      | ko:K02454           | T2SSE,T2SSE_N                                                                              |
| GCA_009785095.1_ASM978509v1_00288                           | 73  | J  | rpsP   | ko:K02959           | Ribosomal_S16                                                                              |
| R0170300311_tooth_RA.megahit.bin.11_00424                   | 70  | V  | -      | ko:K02003,ko:K02004 | ABC_tran,FtsX                                                                              |
| GCA_004100325.1_ASM410032v1_00483                           | 70  | K  | greA   | ko:K03624           | GreA_GreB,GreA_GreB_N                                                                      |
| GCA_002343645.1_ASM234364v1_00219                           | 67  | J  | -      | -                   | SpoU_methylase                                                                             |
| SZAXPI018317-19_RA_dental.metaspades.bin.69_00096           | 60  | D  | ftsW   | ko:K03588           | FTSW RODA_SPOVE                                                                            |
| GCA_009785095.1_ASM978509v1_00723                           | 60  | J  | ychF   | ko:K06942           | MMR_HSR1,YchF-GTPase_C                                                                     |
| GCA_946530965.1_SRR873598_bin.145_metaWRAP_v1.3_MAG_00668   | 59  | V  | macB   | ko:K02003           | ABC_tran                                                                                   |
| GCA_017512225.1_00108                                       | 50  | J  | rpsE   | ko:K02988           | Ribosomal_S5,Ribosomal_S5_C                                                                |
| GCA_010014525.1_ASM1001452v1_00374                          | 49  | GM | -      | ko:K01990           | ABC_tran,Wzt_C                                                                             |
| GCA_016283505.1_ASM1628350v1_00168                          | 48  | J  | ybhK   | -                   | UPF0052                                                                                    |
| GCA_009778675.1_ASM977867v1_00515                           | 46  | S  | gatA   | ko:K02433           | Amidase                                                                                    |
| RSZAXPI002311-20_RA_dental.metaspades.bin.31_00835          | 41  | S  | -      | -                   | NYN                                                                                        |

|                                                             |    |    |      |                     |                                      |
|-------------------------------------------------------------|----|----|------|---------------------|--------------------------------------|
| R0170300223_tooth_RA.megahit.bin.44_00035                   | 37 | H  | -    | ko:K00558           | DNA_methylase                        |
| GCA_947304825.1_SRR10912542_bin.28_metaWRAP_v1.3_MAG_00274  | 34 | J  | glyS | ko:K01880           | HGTP_anticodon,tRNA-synt_2b          |
| GCA_017406775.1_00663                                       | 33 | O  | -    | -                   | Bro-N                                |
| GCA_017432025.1_00591                                       | 31 | M  | -    | ko:K17716           | Polysacc_syn_2C,Polysacc_synt_2      |
| GCA_947425855.1_SRR19981115_bin.7_metawrap_v1.3_MAG_00340   | 29 | LU | dprA | ko:K04096           | DNA_processq_A                       |
| GCA_947253405.1_SRR17635715_bin.15_metaWRAP_v1.3_MAG_00520  | 27 | M  | murF | ko:K01929           | Mur_ligase,Mur_ligase_C,Mur_ligase_M |
| GCA_017421325.1_00495                                       | 27 | J  | trmD | ko:K00554           | tRNA_m1G_MT                          |
| GCA_947304135.1_SRR10912535_bin.47_metaWRAP_v1.3_MAG_00255  | 24 | M  | murA | ko:K00790           | EPSP_synthase,HTH_3                  |
| GCA_027492975.1_ASM2749297v1_00587                          | 23 | D  | xerD | ko:K04763           | Phage_int_SAM_1,Phage_integrase      |
| GCA_946478995.1_SRR15094062_bin.6_metawrap_v1.3.0_MAG_00038 | 22 | E  | trpB | ko:K01696,ko:K06001 | PALP                                 |
| GCA_017557805.1_ASM1755780v1_00528                          | 21 | M  | rfaA | ko:K00973           | NTP_transferase                      |
| GCA_020428475.1_ASM2042847v1_00615                          | 21 | S  | jag  | ko:K06346           | Jag_N,KH_4,R3H                       |
| GCA_946411665.1_SRR12081298_bin.32_metaWRAP_v1.3_MAG_00080  | 18 | V  | hsdM | ko:K03427           | HsdM_N,N6_Mtase                      |
| GCA_017480035.1_00498                                       | 16 | E  | -    | ko:K02003           | ABC_tran                             |
| SZAXPI018288-133_RA_dental.metaspades.bin.4_00792           | 16 | H  | uppS | ko:K00806           | Prenyltransf                         |
| GCA_013333595.2_ASM1333359v2_00801                          | 11 | F  | rimK | ko:K05844           | RimK                                 |
| GCA_947246665.1_SRR14920969_bin.19_metawrap_v1.3_MAG_00740  | 10 | J  | rplA | ko:K02863           | Ribosomal_L1                         |
| GCA_017460165.1_00481                                       | 9  | S  | obg  | ko:K03979           | DUF1967,GTP1_OBG,MMR_HSR1            |
| GCA_017561575.1_ASM1756157v1_00111                          | 8  | C  | rbr  | -                   | Rubrythrin                           |

---







|                   |              |            |                  |                      |                     |                                        |
|-------------------|--------------|------------|------------------|----------------------|---------------------|----------------------------------------|
| ORS-TM06-96       | Firmicutes   | Bacilli    | Lactobacillales  | Aerococcaceae        | Granulicatella      | Granulicatella_adiacensODP-TM07-145    |
| SEQF2520          | Firmicutes   | Bacilli    | Lactobacillales  | Aerococcaceae        | Granulicatella      | Granulicatella_adiacensSEQF1605        |
| SEQF1066          | Firmicutes   | Bacilli    | Lactobacillales  | Aerococcaceae        | Granulicatella      | Granulicatella_sp001058355             |
| SEQF2221          | Firmicutes   | Bacilli    | Lactobacillales  | Aerococcaceae        | Granulicatella      | Granulicatella_sp001071995             |
| SEQF1997          | Firmicutes   | Bacilli    | Lactobacillales  | Aerococcaceae        | Granulicatella      | ODP-AM08-289                           |
| SEQF2589          | Firmicutes   | Bacilli    | Lactobacillales  | Aerococcaceae        | Granulicatella      | ORS-AF08-3-MRS                         |
| SEQF2020          | Firmicutes   | Bacilli    | Lactobacillales  | Aerococcaceae        | Granulicatella      | ORS-TM06-91                            |
| SEQF2397          | Firmicutes   | Bacilli    | Lactobacillales  | Aerococcaceae        | Granulicatella      | ORS-TM07-255                           |
| SEQF2588          | Firmicutes   | Bacilli    | Lactobacillales  | Aerococcaceae        | Granulicatella      | ORT-AM05-101                           |
| SEQF1500          | Firmicutes   | Bacilli    | Lactobacillales  | Aerococcaceae        | Granulicatella      | ORT-TM06-249                           |
| SEQF1924          | Firmicutes   | Bacilli    | Lactobacillales  | Enterococcaceae      | Enterococcus        | Enterococcus_faecalis                  |
| SEQF2212          | Firmicutes   | Bacilli    | Lactobacillales  | Enterococcaceae      | Enterococcus_D      | Enterococcus_D_cassellflavus           |
| ORT-AM09-10-104   | Firmicutes   | Bacilli    | Lactobacillales  | Lactobacillaceae     | Lactocaseibacillus  | Lactocaseibacillus_paracasei           |
| SEQF2215          | Firmicutes   | Bacilli    | Lactobacillales  | Lactobacillaceae     | Lactocaseibacillus  | Lactocaseibacillus_rhamnosus           |
| SEQF2398          | Firmicutes   | Bacilli    | Lactobacillales  | Lactobacillaceae     | Lactobacillus       | Lactobacillus_crispatus                |
| SEQF2592          | Firmicutes   | Bacilli    | Lactobacillales  | Lactobacillaceae     | Lactobacillus       | Lactobacillus_gasseri                  |
| ORS-AM09-22-104   | Firmicutes   | Bacilli    | Lactobacillales  | Lactobacillaceae     | Lactobacillus       | Lactobacillus_paragasseri              |
| ORS-AF03-170      | Firmicutes   | Bacilli    | Lactobacillales  | Lactobacillaceae     | Ligilactobacillus   | Ligilactobacillus_salivarius           |
| ODP-AM09-33-BH    | Firmicutes   | Bacilli    | Lactobacillales  | Lactobacillaceae     | Limosilactobacillus | Limosilactobacillus_fermentum          |
| SEQF2767          | Firmicutes   | Bacilli    | Lactobacillales  | Lactobacillaceae     | Limosilactobacillus | Limosilactobacillus_panis              |
| SEQF1999          | Firmicutes   | Bacilli    | Lactobacillales  | Lactobacillaceae     | Limosilactobacillus | Limosilactobacillus_vaginalis          |
| SEQF1998          | Firmicutes   | Bacilli    | Lactobacillales  | Streptococcaceae     | Lactococcus         | Lactococcus_garvieae                   |
| ODP-AF10-C23      | Firmicutes   | Bacilli    | Lactobacillales  | Streptococcaceae     | Lactococcus         | Lactococcus_lactis                     |
| ORS-AM05-478      | Firmicutes   | Bacilli    | Lactobacillales  | Streptococcaceae     | Lactococcus         | Lactococcus_lactis_E                   |
| ORS-AM09-32-BH    | Firmicutes   | Bacilli    | Lactobacillales  | Streptococcaceae     | Streptococcus       | ODP-AF04-83                            |
| SEQF2070          | Firmicutes   | Bacilli    | Lactobacillales  | Streptococcaceae     | Streptococcus       | ODP-AM04-45                            |
| SEQF1019          | Firmicutes   | Bacilli    | Lactobacillales  | Streptococcaceae     | Streptococcus       | ODP-AM05-504                           |
| SEQF2460          | Firmicutes   | Bacilli    | Lactobacillales  | Streptococcaceae     | Streptococcus       | ODP-AM08-386                           |
| SEQF2607          | Firmicutes   | Bacilli    | Lactobacillales  | Streptococcaceae     | Streptococcus       | ODP-AM08-398                           |
| SEQF2553          | Firmicutes   | Bacilli    | Lactobacillales  | Streptococcaceae     | Streptococcus       | ODP-AM09-1-1-O-BH                      |
| SEQF2004          | Firmicutes   | Bacilli    | Lactobacillales  | Streptococcaceae     | Streptococcus       | ODP-AM09-12-104                        |
| ORT-AM01-08MB     | Firmicutes   | Bacilli    | Lactobacillales  | Streptococcaceae     | Streptococcus       | ODP-AM09-14-BH                         |
| ORS-AF10-22-BH    | Firmicutes   | Bacilli    | Lactobacillales  | Streptococcaceae     | Streptococcus       | ODP-AM09-20-O-104                      |
| SEQF3173          | Firmicutes   | Bacilli    | Lactobacillales  | Streptococcaceae     | Streptococcus       | ODP-TM06-159                           |
| ORS-AM09-28-BH    | Firmicutes   | Bacilli    | Lactobacillales  | Streptococcaceae     | Streptococcus       | ORS-AF04-142                           |
| ORS-TM07-52       | Firmicutes   | Bacilli    | Lactobacillales  | Streptococcaceae     | Streptococcus       | ORS-AF04-143                           |
| SEQF2400          | Firmicutes   | Bacilli    | Lactobacillales  | Streptococcaceae     | Streptococcus       | ORS-AF04-252                           |
| SEQF2786          | Firmicutes   | Bacilli    | Lactobacillales  | Streptococcaceae     | Streptococcus       | ORS-AF04-42                            |
| SEQF1889          | Firmicutes   | Bacilli    | Lactobacillales  | Streptococcaceae     | Streptococcus       | ORS-AF08-16-MRS                        |
| SEQF1704          | Firmicutes   | Bacilli    | Lactobacillales  | Streptococcaceae     | Streptococcus       | ORS-AF10-C12                           |
| SEQF1847          | Firmicutes   | Bacilli    | Lactobacillales  | Streptococcaceae     | Streptococcus       | ORS-AF10-C15                           |
| ORS-AF03-155      | Firmicutes   | Bacilli    | Lactobacillales  | Streptococcaceae     | Streptococcus       | ORS-AF10-C20                           |
| SEQF2346          | Firmicutes   | Bacilli    | Lactobacillales  | Streptococcaceae     | Streptococcus       | ORS-AM01-02BB                          |
| SEQF2247          | Firmicutes   | Bacilli    | Lactobacillales  | Streptococcaceae     | Streptococcus       | ORS-AM05-133                           |
| ODP-AM05-394      | Firmicutes   | Bacilli    | Lactobacillales  | Streptococcaceae     | Streptococcus       | ORS-AM05-357                           |
| SEQF1070          | Firmicutes   | Bacilli    | Lactobacillales  | Streptococcaceae     | Streptococcus       | ORS-AM05-481                           |
| SEQF2011          | Firmicutes   | Bacilli    | Lactobacillales  | Streptococcaceae     | Streptococcus       | ORS-AM08-63                            |
| SEQF2017          | Firmicutes   | Bacilli    | Lactobacillales  | Streptococcaceae     | Streptococcus       | ORS-AM09-1-2-O-BH                      |
| SEQF2013          | Firmicutes   | Bacilli    | Lactobacillales  | Streptococcaceae     | Streptococcus       | ORS-AM09-14-O-104                      |
| SEQF1367          | Firmicutes   | Bacilli    | Lactobacillales  | Streptococcaceae     | Streptococcus       | ORS-AM09-15-104                        |
| ORS-TM07-39       | Firmicutes   | Bacilli    | Lactobacillales  | Streptococcaceae     | Streptococcus       | ORS-AM09-1-O-104                       |
| SEQF3473          | Firmicutes   | Bacilli    | Lactobacillales  | Streptococcaceae     | Streptococcus       | ORS-AM09-24-O-104                      |
| SEQF1358          | Firmicutes   | Bacilli    | Lactobacillales  | Streptococcaceae     | Streptococcus       | ORS-AM09-2-O-104                       |
| ODP-AM09-19-O-104 | Firmicutes   | Bacilli    | Lactobacillales  | Streptococcaceae     | Streptococcus       | ORS-AM09-40-O-BH                       |
| SEQF2000          | Firmicutes   | Bacilli    | Lactobacillales  | Streptococcaceae     | Streptococcus       | ORS-AM09-45-O-BH                       |
| ORT-AF08-35-MRS   | Firmicutes   | Bacilli    | Lactobacillales  | Streptococcaceae     | Streptococcus       | ORS-TM06-113                           |
| SEQF2222          | Firmicutes   | Bacilli    | Lactobacillales  | Streptococcaceae     | Streptococcus       | ORS-TM07-227                           |
| SEQF2344          | Firmicutes   | Bacilli    | Lactobacillales  | Streptococcaceae     | Streptococcus       | ORT-AF03-215                           |
| SEQF2342          | Firmicutes   | Bacilli    | Lactobacillales  | Streptococcaceae     | Streptococcus       | ORT-AF04-16                            |
| SEQF1888          | Firmicutes   | Bacilli    | Lactobacillales  | Streptococcaceae     | Streptococcus       | ORT-AF08-17                            |
| SEQF2905          | Firmicutes   | Bacilli    | Lactobacillales  | Streptococcaceae     | Streptococcus       | ORT-AF10-07-O-BH                       |
| SEQF2005          | Firmicutes   | Bacilli    | Lactobacillales  | Streptococcaceae     | Streptococcus       | ORT-AM04-05                            |
| ODP-AF06-108      | Firmicutes   | Bacilli    | Lactobacillales  | Streptococcaceae     | Streptococcus       | ORT-AM05-05                            |
| ORS-AM09-43-O-BH  | Firmicutes   | Bacilli    | Lactobacillales  | Streptococcaceae     | Streptococcus       | ORT-AM05-529                           |
| SEQF2009          | Firmicutes   | Bacilli    | Lactobacillales  | Streptococcaceae     | Streptococcus       | ORT-AM08-195                           |
| ODP-AM09-16-O-BH  | Firmicutes   | Bacilli    | Lactobacillales  | Streptococcaceae     | Streptococcus       | ORT-AM08-434                           |
| ORS-TM06-36       | Firmicutes   | Bacilli    | Lactobacillales  | Streptococcaceae     | Streptococcus       | ORT-AM09-12-O-104                      |
| ORT-AM09-21-O-104 | Firmicutes   | Bacilli    | Lactobacillales  | Streptococcaceae     | Streptococcus       | ORT-AM09-20-O-104                      |
| SEQF3398          | Firmicutes   | Bacilli    | Lactobacillales  | Streptococcaceae     | Streptococcus       | ORT-AM09-9-O-104                       |
| ORS-AM09-5-104    | Firmicutes   | Bacilli    | Lactobacillales  | Streptococcaceae     | Streptococcus       | ORT-TM06-193                           |
| SEQF2783          | Firmicutes   | Bacilli    | Lactobacillales  | Streptococcaceae     | Streptococcus       | Streptococcus_anginosus                |
| SEQF2298          | Firmicutes   | Bacilli    | Lactobacillales  | Streptococcaceae     | Streptococcus       | Streptococcus_anginosus_C              |
| SEQF2071          | Firmicutes   | Bacilli    | Lactobacillales  | Streptococcaceae     | Streptococcus       | Streptococcus_austriacus               |
| SEQF2204          | Firmicutes   | Bacilli    | Lactobacillales  | Streptococcaceae     | Streptococcus       | Streptococcus_constellatus             |
| SEQF1836          | Firmicutes   | Bacilli    | Lactobacillales  | Streptococcaceae     | Streptococcus       | Streptococcus_cristatus                |
| SEQF1324          | Firmicutes   | Bacilli    | Lactobacillales  | Streptococcaceae     | Streptococcus       | Streptococcus_cristatus_B              |
| ORS-AM05-336      | Firmicutes   | Bacilli    | Lactobacillales  | Streptococcaceae     | Streptococcus       | Streptococcus_cristatus_G              |
| SEQF2442          | Firmicutes   | Bacilli    | Lactobacillales  | Streptococcaceae     | Streptococcus       | Streptococcus_gordonii                 |
| SEQF1839          | Firmicutes   | Bacilli    | Lactobacillales  | Streptococcaceae     | Streptococcus       | Streptococcus_hallii                   |
| SEQF1993          | Firmicutes   | Bacilli    | Lactobacillales  | Streptococcaceae     | Streptococcus       | Streptococcus_infantilus               |
| SEQF1596          | Firmicutes   | Bacilli    | Lactobacillales  | Streptococcaceae     | Streptococcus       | Streptococcus_infantis                 |
| SEQF3057          | Firmicutes   | Bacilli    | Lactobacillales  | Streptococcaceae     | Streptococcus       | Streptococcus_infantis_B               |
| SEQF1672          | Firmicutes   | Bacilli    | Lactobacillales  | Streptococcaceae     | Streptococcus       | Streptococcus_infantis_G               |
| ODP-AM05-456      | Firmicutes   | Bacilli    | Lactobacillales  | Streptococcaceae     | Streptococcus       | Streptococcus_infantis_I               |
| SEQF1881          | Firmicutes   | Bacilli    | Lactobacillales  | Streptococcaceae     | Streptococcus       | Streptococcus_intermedius              |
| SEQF2760          | Firmicutes   | Bacilli    | Lactobacillales  | Streptococcaceae     | Streptococcus       | Streptococcus_mitis_AC                 |
| SEQF1478          | Firmicutes   | Bacilli    | Lactobacillales  | Streptococcaceae     | Streptococcus       | Streptococcus_mitis_AI                 |
| ORS-AM09-2-104    | Firmicutes   | Bacilli    | Lactobacillales  | Streptococcaceae     | Streptococcus       | Streptococcus_mitis_AW                 |
| SEQF1854          | Firmicutes   | Bacilli    | Lactobacillales  | Streptococcaceae     | Streptococcus       | Streptococcus_mitis_AX                 |
| SEQF2777          | Firmicutes   | Bacilli    | Lactobacillales  | Streptococcaceae     | Streptococcus       | Streptococcus_mitis_AY                 |
| SEQF1603          | Firmicutes   | Bacilli    | Lactobacillales  | Streptococcaceae     | Streptococcus       | Streptococcus_mitis_AZ                 |
| SEQF3175          | Firmicutes   | Bacilli    | Lactobacillales  | Streptococcaceae     | Streptococcus       | Streptococcus_mitis_BB                 |
| SEQF1045          | Firmicutes   | Bacilli    | Lactobacillales  | Streptococcaceae     | Streptococcus       | Streptococcus_mitis_BG                 |
| SEQF2481          | Firmicutes   | Bacilli    | Lactobacillales  | Streptococcaceae     | Streptococcus       | Streptococcus_mitis_O                  |
| SEQF3164          | Firmicutes   | Bacilli    | Lactobacillales  | Streptococcaceae     | Streptococcus       | Streptococcus_mutans                   |
| SEQF3052          | Firmicutes   | Bacilli    | Lactobacillales  | Streptococcaceae     | Streptococcus       | Streptococcus_oralis_AC                |
| SEQF2789          | Firmicutes   | Bacilli    | Lactobacillales  | Streptococcaceae     | Streptococcus       | Streptococcus_oralis_B                 |
| SEQF1695          | Firmicutes   | Bacilli    | Lactobacillales  | Streptococcaceae     | Streptococcus       | Streptococcus_oralis_BA                |
| SEQF2744          | Firmicutes   | Bacilli    | Lactobacillales  | Streptococcaceae     | Streptococcus       | Streptococcus_oralis_BC                |
| SEQF2787          | Firmicutes   | Bacilli    | Lactobacillales  | Streptococcaceae     | Streptococcus       | Streptococcus_oralis_BD                |
| SEQF3053          | Firmicutes   | Bacilli    | Lactobacillales  | Streptococcaceae     | Streptococcus       | Streptococcus_oralis_G                 |
| SEQF3171          | Firmicutes   | Bacilli    | Lactobacillales  | Streptococcaceae     | Streptococcus       | Streptococcus_oralis_L                 |
| SEQF1018          | Firmicutes   | Bacilli    | Lactobacillales  | Streptococcaceae     | Streptococcus       | Streptococcus_oralis_S                 |
| SEQF1912          | Firmicutes   | Bacilli    | Lactobacillales  | Streptococcaceae     | Streptococcus       | Streptococcus_oralis_T                 |
| SEQF3179          | Firmicutes   | Bacilli    | Lactobacillales  | Streptococcaceae     | Streptococcus       | Streptococcus_oralis_W                 |
| SEQF1921          | Firmicutes   | Bacilli    | Lactobacillales  | Streptococcaceae     | Streptococcus       | Streptococcus_parasanguinis            |
| SEQF1393          | Firmicutes   | Bacilli    | Lactobacillales  | Streptococcaceae     | Streptococcus       | Streptococcus_parasanguinis_B          |
| SEQF1029          | Firmicutes   | Bacilli    | Lactobacillales  | Streptococcaceae     | Streptococcus       | Streptococcus_parasanguinis_C          |
| SEQF1676          | Firmicutes   | Bacilli    | Lactobacillales  | Streptococcaceae     | Streptococcus       | Streptococcus_peroris                  |
| SEQF2505          | Firmicutes   | Bacilli    | Lactobacillales  | Streptococcaceae     | Streptococcus       | Streptococcus_pseudopneumoniae_O       |
| SEQF2443          | Firmicutes   | Bacilli    | Lactobacillales  | Streptococcaceae     | Streptococcus       | Streptococcus_pyogenes                 |
| SEQF1697          | Firmicutes   | Bacilli    | Lactobacillales  | Streptococcaceae     | Streptococcus       | Streptococcus_ratti                    |
| SEQF1914          | Firmicutes   | Bacilli    | Lactobacillales  | Streptococcaceae     | Streptococcus       | Streptococcus_rubneri                  |
| SEQF1616          | Firmicutes   | Bacilli    | Lactobacillales  | Streptococcaceae     | Streptococcus       | Streptococcus_salivarius               |
| SEQF1673          | Firmicutes   | Bacilli    | Lactobacillales  | Streptococcaceae     | Streptococcus       | Streptococcus_sanguinis                |
| SEQF1958          | Firmicutes   | Bacilli    | Lactobacillales  | Streptococcaceae     | Streptococcus       | Streptococcus_sanguinis_AORS-AM01-02MB |
| SEQF1690          | Firmicutes   | Bacilli    | Lactobacillales  | Streptococcaceae     | Streptococcus       | Streptococcus_sanguinis_ASEQF2016      |
| SEQF1890          | Firmicutes   | Bacilli    | Lactobacillales  | Streptococcaceae     | Streptococcus       | Streptococcus_sanguinis_C              |
| SEQF1951          | Firmicutes   | Bacilli    | Lactobacillales  | Streptococcaceae     | Streptococcus       | Streptococcus_sanguinis_E              |
| SEQF2454          | Firmicutes   | Bacilli    | Lactobacillales  | Streptococcaceae     | Streptococcus       | Streptococcus_sanguinis_H              |
| SEQF2805          | Firmicutes   | Bacilli    | Lactobacillales  | Streptococcaceae     | Streptococcus       | Streptococcus_sinensis                 |
| SEQF2919          | Firmicutes   | Bacilli    | Lactobacillales  | Streptococcaceae     | Streptococcus       | Streptococcus_sobrinus                 |
| SEQF2446          | Firmicutes   | Bacilli    | Lactobacillales  | Streptococcaceae     | Streptococcus       | Streptococcus_sp000187445              |
| SEQF1598          | Firmicutes   | Bacilli    | Lactobacillales  | Streptococcaceae     | Streptococcus       | Streptococcus_sp000187745              |
| SEQF2855          | Firmicutes   | Bacilli    | Lactobacillales  | Streptococcaceae     | Streptococcus       | Streptococcus_sp000220065              |
| SEQF1103          | Firmicutes   | Bacilli    | Lactobacillales  | Streptococcaceae     | Streptococcus       | Streptococcus_sp000235485              |
| SEQF1959          | Firmicutes   | Bacilli    | Lactobacillales  | Streptococcaceae     | Streptococcus       | Streptococcus_sp000314795              |
| SEQF1880          | Firmicutes   | Bacilli    | Lactobacillales  | Streptococcaceae     | Streptococcus       | Streptococcus_sp001553685              |
| SEQF1685          | Firmicutes   | Bacilli    | Lactobacillales  | Streptococcaceae     | Streptococcus       | Streptococcus_sp001556435              |
| SEQF1859          | Firmicutes   | Bacilli    | Lactobacillales  | Streptococcaceae     | Streptococcus       | Streptococcus_sp001587175              |
| ODP-AM09-2D21     | Firmicutes   | Bacilli    | Lactobacillales  | Streptococcaceae     | Streptococcus       | Streptococcus_sp004166885              |
| SEQF2811          | Firmicutes   | Bacilli    | Lactobacillales  | Streptococcaceae     | Streptococcus       | Streptococcus_sp013394695              |
| SEQF1159          | Firmicutes   | Bacilli    | Lactobacillales  | Streptococcaceae     | Streptococcus       | Streptococcus_sp00550895               |
| SEQF2564          | Firmicutes   | Bacilli    | Lactobacillales  | Streptococcaceae     | Streptococcus       | Streptococcus_sp002460355              |
| SEQF1698          | Firmicutes   | Bacilli    | Lactobacillales  | Streptococcaceae     | Streptococcus       | Streptococcus_vestibularis             |
| ODP-AF08-22-MRS   | Firmicutes   | Bacilli    | Mycoplasmatales  | Metamycoplasmataceae | Metamycoplasma      | Metamycoplasma_orale                   |
| SEQF1680          | Firmicutes   | Bacilli    | Mycoplasmatales  | Metamycoplasmataceae | Metamycoplasma      | Metamycoplasma_salivarium              |
| SEQF2555          | Firmicutes   | Bacilli    | Staphylococcales | Gemellaceae          | Gemella             | Gemella_bergeri                        |
| SEQF2529          | Firmicutes   | Bacilli    | Staphylococcales | Gemellaceae          | Gemella             | Gemella_haemolysans                    |
| SEQF2814          | Firmicutes   | Bacilli    | Staphylococcales | Gemellaceae          | Gemella             | Gemella_haemolysans_A                  |
| SEQF1879          | Firmicutes   | Bacilli    | Staphylococcales | Gemellaceae          | Gemella             | Gemella_haemolysans_B                  |
| SEQF2820          | Firmicutes   | Bacilli    | Staphylococcales | Gemellaceae          | Gemella             | Gemella_massiliensis                   |
| SEQF2670          | Firmicutes   | Bacilli    | Staphylococcales | Gemellaceae          | Gemella             | Gemella_morbilorum                     |
| SEQF1287          | Firmicutes   | Bacilli    | Staphylococcales | Gemellaceae          | Gemella             | Gemella_sanguinis                      |
| SEQF1160          | Firmicutes   | Bacilli    | Staphylococcales | Gemellaceae          | Gemella             | ODP-TM06-153                           |
| SEQF2822          | Firmicutes   | Bacilli    | Staphylococcales | Gemellaceae          | Gemella             | ORS-AM09-3-104                         |
| SEQF2841          | Firmicutes   | Bacilli    | Staphylococcales | Gemellaceae          | Gemella             | ORT-AF03-76                            |
| SEQF2581          | Firmicutes   | Bacilli    | Staphylococcales | Staphylococcaceae    | Staphylococcus      | Staphylococcus_capitis                 |
| SEQF3159          | Firmicutes   | Bacilli    | Staphylococcales | Staphylococcaceae    | Staphylococcus      | Staphylococcus_caprae                  |
| ODP-AM05-423      | Firmicutes   | Bacilli    | Staphylococcales | Staphylococcaceae    | Staphylococcus      | Staphylococcus_epidermidis             |
| SEQF2501          | Firmicutes   | Bacilli    | Staphylococcales | Staphylococcaceae    | Staphylococcus      | Staphylococcus_hominis                 |
| SEQF2353          | Firmicutes   | Bacilli    | Staphylococcales | Staphylococcaceae    | Staphylococcus      | Staphylococcus_warneri                 |
| SEQF2920          | Firmicutes   | Bacilli    | Staphylococcales | Staphylococcaceae    | Staphylococcus      | Staphylococcus_warneri_A               |
| SEQF3177          | Firmicutes A | Clostridia | Eubacteriales    | Eubacteriaceae       | Pseudoramibacter    | Pseudoramibacter_alactolyticus         |
| SEQF3178          | Firmicutes A | Clostridia | Lachnospirales   | Lachnospiraceae      | Catonella           | Catonella_morbi                        |
| SEQF1618          | Firmicutes A | Clostridia | Lachnospirales   | Lachnospiraceae      | Catonella           | ODP-AM01-10                            |
| SEQF2444          | Firmicutes A | Clostridia | Lachnospirales   | Lachnospiraceae      | F0428               | F0428_sp003043955                      |
| SEQF2748          | Firmicutes A | Clostridia | Lachnospirales   | Lachnospiraceae      | Johnsonella         | Johnsonella_ignava                     |
| SEQF2778          | Firmicutes A | Clostridia | Lachnospirales   | Lachnospiraceae      | Lachnoaerobaculum   | Lachnoaerobaculum_gingivalis           |
| SEQF3087          | Firmicutes A | Clostridia | Lachnospirales   | Lachnospiraceae      | Lachnoaerobaculum   | Lachnoaerobaculum_orale                |
| SEQF2057          | Firmicutes A | Clostridia | Lachnospirales   | Lachnospiraceae      | Lachnoaerobaculum   | Lachnoaerobaculum_saburum              |



|                                               |                 |                    |                         |                     |                          |                                                                         |
|-----------------------------------------------|-----------------|--------------------|-------------------------|---------------------|--------------------------|-------------------------------------------------------------------------|
| SEQF1981                                      | Firmicutes_A    | Clostridia         | Lachnospirales          | Lachnospiraceae     | Lachnoanaerobaculum      | Lachnoanaerobaculum_sp000209465                                         |
| SEQF2047                                      | Firmicutes_A    | Clostridia         | Lachnospirales          | Lachnospiraceae     | Lachnoanaerobaculum      | Lachnoanaerobaculum_sp000296385                                         |
| SEQF2629                                      | Firmicutes_A    | Clostridia         | Lachnospirales          | Lachnospiraceae     | Lachnoanaerobaculum      | ORT-AM05-95                                                             |
| SEQF2615                                      | Firmicutes_A    | Clostridia         | Lachnospirales          | Lachnospiraceae     | Oribacterium             | Oribacterium_asaccharolyticum                                           |
| SEQF2079                                      | Firmicutes_A    | Clostridia         | Lachnospirales          | Lachnospiraceae     | Oribacterium             | Oribacterium_parvum                                                     |
| SEQF1594                                      | Firmicutes_A    | Clostridia         | Lachnospirales          | Lachnospiraceae     | Oribacterium             | Oribacterium_sp000160135                                                |
| SEQF1969                                      | Firmicutes_A    | Clostridia         | Lachnospirales          | Lachnospiraceae     | Oribacterium             | Oribacterium_sp013394775                                                |
| SEQF1967                                      | Firmicutes_A    | Clostridia         | Lachnospirales          | Lachnospiraceae     | Oribacterium             | ORS-AF05-220                                                            |
| SEQF2899                                      | Firmicutes_A    | Clostridia         | Lachnospirales          | Lachnospiraceae     | Shuttleworthia           | Shuttleworthia_satelles                                                 |
| ORS-AM05-334                                  | Firmicutes_A    | Clostridia         | Lachnospirales          | Lachnospiraceae     | Stomatobaculum           | Stomatobaculum_longum                                                   |
| SEQF1195                                      | Firmicutes_A    | Clostridia         | Lachnospirales          | Lachnospiraceae     | Stomatobaculum           | Stomatobaculum_naviforme                                                |
| ORT-AF10-25-O-BH                              | Firmicutes_A    | Clostridia         | †eptostreptococcale     | Anaerovoraceae      | Eubacterium_A            | Eubacterium_A_minutum                                                   |
| SEQF2159                                      | Firmicutes_A    | Clostridia         | †eptostreptococcale     | Anaerovoraceae      | Eubacterium_A            | Eubacterium_A_nodatum                                                   |
| SEQF1276                                      | Firmicutes_A    | Clostridia         | †eptostreptococcale     | Anaerovoraceae      | Eubacterium_B            | Eubacterium_B_infirum                                                   |
| SEQF1175                                      | Firmicutes_A    | Clostridia         | †eptostreptococcale     | Anaerovoraceae      | Eubacterium_B            | Eubacterium_B_sulci                                                     |
| SEQF1264                                      | Firmicutes_A    | Clostridia         | †eptostreptococcale     | Anaerovoraceae      | Eubacterium_M            | Eubacterium_M_brachy                                                    |
| ORT-AM05-52                                   | Firmicutes_A    | Clostridia         | †eptostreptococcale     | Anaerovoraceae      | Mogibacterium            | Mogibacterium_diversum                                                  |
| ORS-AM09-16-O-BH                              | Firmicutes_A    | Clostridia         | †eptostreptococcale     | Anaerovoraceae      | Mogibacterium            | Mogibacterium_timidum                                                   |
| SEQF1659                                      | Firmicutes_A    | Clostridia         | †eptostreptococcale     | Filifactoraceae     | Filifactor               | Filifactor_alocis                                                       |
| SEQF2142                                      | Firmicutes_A    | Clostridia         | †eptostreptococcale     | Filifactoraceae     | Peptoanaerobacter        | ORT-AM01-02                                                             |
| SEQF1944                                      | Firmicutes_A    | Clostridia         | †eptostreptococcale     | Filifactoraceae     | Peptoanaerobacter        | Peptoanaerobacter_margaretiae                                           |
| SEQF1165                                      | Firmicutes_A    | Clostridia         | †eptostreptococcale     | Filifactoraceae     | Peptoanaerobacter        | Peptoanaerobacter_stomatis                                              |
| SEQF2330                                      | Firmicutes_A    | Clostridia         | †eptostreptococcale     | †eptostreptococcale | Peptostreptococcus       | Peptostreptococcus_anaerobius                                           |
| SEQF1652                                      | Firmicutes_A    | Clostridia         | †eptostreptococcale     | †eptostreptococcale | Peptostreptococcus       | Peptostreptococcus_stomatis                                             |
| SEQF1604                                      | Firmicutes_A    | Clostridia         | Tissierellales          | Peptoniphilaceae    | Parvimonas               | Parvimonas_micra                                                        |
| SEQF1860                                      | Firmicutes_A    | Clostridia         | Tissierellales          | Peptoniphilaceae    | Parvimonas               | Parvimonas_sp000214475                                                  |
| SEQF2824                                      | Firmicutes_A    | Clostridia         | Tissierellales          | Peptoniphilaceae    | Peptoniphilus_A          | Peptoniphilus_A_lacrimalis                                              |
| SEQF3495                                      | Firmicutes_A    | Clostridia         | Tissierellales          | Peptoniphilaceae    | W5053                    | W5053_sp000467935                                                       |
| SEQF1221                                      | Firmicutes_C    | Negativicutes      | Selenomonadales         | Selenomonadaceae    | Centipeda                | Centipeda_artermidis                                                    |
| SEQF1957                                      | Firmicutes_C    | Negativicutes      | Selenomonadales         | Selenomonadaceae    | Centipeda                | Centipeda_felix                                                         |
| SEQF2445                                      | Firmicutes_C    | Negativicutes      | Selenomonadales         | Selenomonadaceae    | Centipeda                | Centipeda_fueggei                                                       |
| SEQF1963                                      | Firmicutes_C    | Negativicutes      | Selenomonadales         | Selenomonadaceae    | Centipeda                | Centipeda_infelix                                                       |
| SEQF1850                                      | Firmicutes_C    | Negativicutes      | Selenomonadales         | Selenomonadaceae    | Centipeda                | Centipeda_noxia                                                         |
| SEQF2076                                      | Firmicutes_C    | Negativicutes      | Selenomonadales         | Selenomonadaceae    | Centipeda                | Centipeda_periodontii                                                   |
| SEQF2997                                      | Firmicutes_C    | Negativicutes      | Selenomonadales         | Selenomonadaceae    | Centipeda                | Centipeda_sp000315545                                                   |
| SEQF3061                                      | Firmicutes_C    | Negativicutes      | Selenomonadales         | Selenomonadaceae    | Centipeda                | Centipeda_sp000318175                                                   |
| SEQF2774                                      | Firmicutes_C    | Negativicutes      | Selenomonadales         | Selenomonadaceae    | Centipeda                | Centipeda_sp000468035                                                   |
| SEQF2918                                      | Firmicutes_C    | Negativicutes      | Selenomonadales         | Selenomonadaceae    | Centipeda                | Centipeda_sp001683335                                                   |
| SEQF2776                                      | Firmicutes_C    | Negativicutes      | Selenomonadales         | Selenomonadaceae    | Centipeda                | Centipeda_sp001715785                                                   |
| SEQF2775                                      | Firmicutes_C    | Negativicutes      | Selenomonadales         | Selenomonadaceae    | Mitsuokella              | Mitsuokella_sp000469545                                                 |
| SEQF1940                                      | Firmicutes_C    | Negativicutes      | Selenomonadales         | Selenomonadaceae    | Selenomonas              | Selenomonas_sputigena                                                   |
| SEQF1947                                      | Firmicutes_C    | Veillonellales     | Dialisteraceae          | Dialister           | Allisonella              | Allisonella_pneumosintes                                                |
| SEQF1870                                      | Firmicutes_C    | Veillonellales     | Dialisteraceae          | Dialister           | Dialister                | Dialister_invisus                                                       |
| SEQF1875                                      | Firmicutes_C    | Veillonellales     | Dialisteraceae          | Dialister           | Dialister_B              | Dialister_B_micraerophilus                                              |
| SEQF2771                                      | Firmicutes_C    | Veillonellales     | Megasphaeraeae          | Anaeroglobus        | Anaeroglobus             | Anaeroglobus_geminatus                                                  |
| SEQF2462                                      | Firmicutes_C    | Veillonellales     | Megasphaeraeae          | Anaeroglobus        | Anaeroglobus             | Anaeroglobus_micronuciformis                                            |
| SEQF1941                                      | Firmicutes_C    | Veillonellales     | Veillonellaceae         | F0422               | F0422_sp001553345        | F0422_sp001553345                                                       |
| SEQF1942                                      | Firmicutes_C    | Veillonellales     | Veillonellaceae         | Veillonella         | ORT-AM09-5D4             | ORT-AM09-5D4                                                            |
| SEQF3158                                      | Firmicutes_C    | Veillonellales     | Veillonellaceae         | Veillonella         | Veillonella_atypica      | Veillonella_atypica                                                     |
| SEQF2757                                      | Firmicutes_C    | Veillonellales     | Veillonellaceae         | Veillonella         | Veillonella_denticariosi | Veillonella_denticariosi                                                |
| SEQF2078                                      | Firmicutes_C    | Veillonellales     | Veillonellaceae         | Veillonella         | Veillonella_dispar       | Veillonella_dispar                                                      |
| SEQF1611                                      | Firmicutes_C    | Veillonellales     | Veillonellaceae         | Veillonella         | Veillonella_parvula_A    | Veillonella_parvula_A                                                   |
| ODP-AF04-83                                   | Firmicutes_C    | Veillonellales     | Veillonellaceae         | Veillonella         | Veillonella_rogosae      | Veillonella_rogosae                                                     |
| ODP-AM01-06                                   | Firmicutes_C    | Veillonellales     | Veillonellaceae         | Veillonella         | Veillonella_sp000757715  | Veillonella_sp000757715                                                 |
| ODP-AM04-45                                   | Fusobacteriota  | Fusobacteriia      | Fusobacteriales         | Fusobacteriaceae    | Fusobacterium            | Fusobacterium_animalis                                                  |
| ODP-AM05-504                                  | Fusobacteriota  | Fusobacteriia      | Fusobacteriales         | Fusobacteriaceae    | Fusobacterium            | Fusobacterium_hwasookii                                                 |
| ODP-AM08-289                                  | Fusobacteriota  | Fusobacteriia      | Fusobacteriales         | Fusobacteriaceae    | Fusobacterium            | Fusobacterium_nucleatum                                                 |
| ODP-AM08-386                                  | Fusobacteriota  | Fusobacteriia      | Fusobacteriales         | Fusobacteriaceae    | Fusobacterium            | Fusobacterium_periodonticum                                             |
| ODP-AM08-398                                  | Fusobacteriota  | Fusobacteriia      | Fusobacteriales         | Fusobacteriaceae    | Fusobacterium            | Fusobacterium_periodonticum_B                                           |
| ODP-AM08-466                                  | Fusobacteriota  | Fusobacteriia      | Fusobacteriales         | Fusobacteriaceae    | Fusobacterium            | Fusobacterium_periodonticum_D                                           |
| ODP-AM09-1-1-O-BH                             | Fusobacteriota  | Fusobacteriia      | Fusobacteriales         | Fusobacteriaceae    | Fusobacterium            | Fusobacterium_polymorphum                                               |
| ODP-AM09-12-104                               | Fusobacteriota  | Fusobacteriia      | Fusobacteriales         | Fusobacteriaceae    | Fusobacterium            | Fusobacterium_sp000235465                                               |
| ODP-AM09-14-BH                                | Fusobacteriota  | Fusobacteriia      | Fusobacteriales         | Fusobacteriaceae    | Fusobacterium            | Fusobacterium_vincetii                                                  |
| ODP-AM01-10                                   | Fusobacteriota  | Fusobacteriia      | Fusobacteriales         | Fusobacteriaceae    | Fusobacterium            | ODP-AM01-06                                                             |
| ODP-AM09-20-O-104                             | Fusobacteriota  | Fusobacteriia      | Fusobacteriales         | Fusobacteriaceae    | Fusobacterium_C          | Fusobacterium_C_necrophorum                                             |
| ODP-TM06-153                                  | Fusobacteriota  | Fusobacteriia      | Fusobacteriales         | Leptotrichiaceae    | Leptotrichia             | Leptotrichia_buccalis                                                   |
| ODP-TM06-159                                  | Fusobacteriota  | Fusobacteriia      | Fusobacteriales         | Leptotrichiaceae    | Leptotrichia             | Leptotrichia_hofstadii                                                  |
| ODP-TM07-145                                  | Fusobacteriota  | Fusobacteriia      | Fusobacteriales         | Leptotrichiaceae    | Leptotrichia             | Leptotrichia_hongkongensis                                              |
| ORS-AF04-134                                  | Fusobacteriota  | Fusobacteriia      | Fusobacteriales         | Leptotrichiaceae    | Leptotrichia             | Leptotrichia_massiliensis                                               |
| ORS-AF04-142                                  | Fusobacteriota  | Fusobacteriia      | Fusobacteriales         | Leptotrichiaceae    | Leptotrichia             | Leptotrichia_shahii                                                     |
| ORS-AF04-143                                  | Fusobacteriota  | Fusobacteriia      | Fusobacteriales         | Leptotrichiaceae    | Leptotrichia             | Leptotrichia_sp000469385                                                |
| ORS-AF04-252                                  | Fusobacteriota  | Fusobacteriia      | Fusobacteriales         | Leptotrichiaceae    | Leptotrichia             | Leptotrichia_sp002240055                                                |
| ORS-AF04-42                                   | Fusobacteriota  | Fusobacteriia      | Fusobacteriales         | Leptotrichiaceae    | Leptotrichia             | Leptotrichia_sp013394795                                                |
| ORS-AF05-220                                  | Fusobacteriota  | Fusobacteriia      | Fusobacteriales         | Leptotrichiaceae    | Leptotrichia             | Leptotrichia_wadei                                                      |
| ORS-AF08-16-MRS                               | Fusobacteriota  | Fusobacteriia      | Fusobacteriales         | Leptotrichiaceae    | Leptotrichia             | Leptotrichia_wadei_A                                                    |
| ORS-AF08-3-MRS                                | Fusobacteriota  | Fusobacteriia      | Fusobacteriales         | Leptotrichiaceae    | Leptotrichia_A           | Leptotrichia_A_sp000469505                                              |
| ORS-AF10-C12                                  | Fusobacteriota  | Fusobacteriia      | Fusobacteriales         | Leptotrichiaceae    | Leptotrichia_A           | Leptotrichia_A_sp001274535                                              |
| ORS-AF10-C15                                  | Fusobacteriota  | Fusobacteriia      | Fusobacteriales         | Leptotrichiaceae    | Pseudoleptotrichia       | Pseudoleptotrichia_goodfellowii                                         |
| ORS-AF10-C20                                  | Fusobacteriota  | Fusobacteriia      | Fusobacteriales         | Leptotrichiaceae    | Sneathia                 | Sneathia_ammii                                                          |
| ORS-AM01-02BB                                 | Fusobacteriota  | Fusobacteriia      | Fusobacteriales         | Leptotrichiaceae    | Sneathia                 | Sneathia_sanguinegens                                                   |
| ORS-AM01-02MB                                 | Proteobacteria  | Burkholderiales    | Burkholderiaceae        | Comamonas           | Comamonas                | Comamonas_testosteroni_B                                                |
| ORS-AM05-133                                  | Proteobacteria  | Burkholderiales    | Burkholderiaceae        | Comamonas           | Comamonas                | Comamonas_testosteroni_B                                                |
| ORS-AM05-357                                  | Proteobacteria  | Burkholderiales    | Burkholderiaceae        | Comamonas           | Comamonas                | Comamonas_thiooxydans                                                   |
| ORS-AM05-364                                  | Proteobacteria  | Burkholderiales    | Burkholderiaceae        | Lautropia           | Lautropia                | Lautropia_mirabilis                                                     |
| ORS-AM05-381                                  | Proteobacteria  | Burkholderiales    | Burkholderiaceae        | Neisseriaceae       | Eikenella                | Eikenella_corrodens                                                     |
| ORS-AM05-481                                  | Proteobacteria  | Burkholderiales    | Neisseriaceae           | Kingella_A          | Kingella_A_dentrificans  | Kingella_A_dentrificans                                                 |
| ORS-AM08-178                                  | Proteobacteria  | Burkholderiales    | Neisseriaceae           | Kingella_B          | Kingella_B_oralis        | Kingella_B_oralis                                                       |
| ORS-AM08-63                                   | Proteobacteria  | Burkholderiales    | Neisseriaceae           | Neisseria           | Neisseria                | Neisseria_bacilliformis                                                 |
| ORS-AM08-79                                   | Proteobacteria  | Burkholderiales    | Neisseriaceae           | Neisseria           | Neisseria                | Neisseria_cinerea                                                       |
| ORS-AM09-1-2-O-BH                             | Proteobacteria  | Burkholderiales    | Neisseriaceae           | Neisseria           | Neisseria                | Neisseria_elongata                                                      |
| ORS-AM09-14-O-104                             | Proteobacteria  | Burkholderiales    | Neisseriaceae           | Neisseria           | Neisseria                | Neisseria_flavescens                                                    |
| ORS-AM09-15-104                               | Proteobacteria  | Burkholderiales    | Neisseriaceae           | Neisseria           | Neisseria                | Neisseria_flavescens_B                                                  |
| ORS-AM09-1-O-104                              | Proteobacteria  | Burkholderiales    | Neisseriaceae           | Neisseria           | Neisseria                | Neisseria_lactamica                                                     |
| ORS-AM09-24-O-104                             | Proteobacteria  | Burkholderiales    | Neisseriaceae           | Neisseria           | Neisseria                | Neisseria_meningitidis                                                  |
| ORS-AM09-26-BH                                | Proteobacteria  | Burkholderiales    | Neisseriaceae           | Neisseria           | Neisseria                | Neisseria_mucosa_A                                                      |
| ORS-AM09-2-O-104                              | Proteobacteria  | Burkholderiales    | Neisseriaceae           | Neisseria           | Neisseria                | Neisseria_sicca                                                         |
| ORS-AM09-3-104                                | Proteobacteria  | Burkholderiales    | Neisseriaceae           | Neisseria           | Neisseria                | Neisseria_sicca_A                                                       |
| ORS-AM09-40-O-BH                              | Proteobacteria  | Burkholderiales    | Neisseriaceae           | Neisseria           | Neisseria                | Neisseria_sicca_D                                                       |
| ORS-AM09-45-O-BH                              | Proteobacteria  | Burkholderiales    | Neisseriaceae           | Neisseria           | Neisseria                | Neisseria_sp000090875                                                   |
| ORS-TM06-113                                  | Proteobacteria  | Burkholderiales    | Neisseriaceae           | Neisseria           | Neisseria                | Neisseria_sp000186165                                                   |
| ORS-TM06-130                                  | Proteobacteria  | Burkholderiales    | Neisseriaceae           | Neisseria           | Neisseria                | Neisseria_sp002237445                                                   |
| ORS-TM06-91                                   | Proteobacteria  | Burkholderiales    | Neisseriaceae           | Neisseria           | Neisseria                | Neisseria_subflava_C                                                    |
| ORS-TM07-227                                  | Proteobacteria  | Burkholderiales    | Neisseriaceae           | Neisseria           | Neisseria                | Neisseria_weaveri                                                       |
| ORS-TM07-255                                  | Proteobacteria  | Burkholderiales    | Neisseriaceae           | Simonsiella         | Simonsiella              | Simonsiella_muelleri                                                    |
| ORT-AF03-190                                  | Proteobacteria  | Cardiobacteriales  | Cardiobacteriaceae      | Cardiobacterium     | Cardiobacterium          | Cardiobacterium_hominis                                                 |
| ORT-AF03-215                                  | Proteobacteria  | Cardiobacteriales  | Cardiobacteriaceae      | Cardiobacterium     | Cardiobacterium          | Cardiobacterium_valvarum                                                |
| ORT-AF03-76                                   | Proteobacteria  | Enterobacteriales  | Pasteurellaceae         | Aggregatibacter     | Aggregatibacter          | Aggregatibacter_actinomycetemcomitans                                   |
| ORT-AF04-16                                   | Proteobacteria  | Enterobacteriales  | Pasteurellaceae         | Aggregatibacter     | Aggregatibacter          | Aggregatibacter_actinomycetemcomitans_A                                 |
| ORT-AF05-232                                  | Proteobacteria  | Enterobacteriales  | Pasteurellaceae         | Aggregatibacter     | Aggregatibacter          | Aggregatibacter_aerophilus                                              |
| ORT-AF05-233                                  | Proteobacteria  | Enterobacteriales  | Pasteurellaceae         | Aggregatibacter     | Aggregatibacter          | Aggregatibacter_segnii                                                  |
| ORT-AF08-17                                   | Proteobacteria  | Enterobacteriales  | Pasteurellaceae         | Aggregatibacter     | Aggregatibacter          | Aggregatibacter_sp000466335                                             |
| ORT-AF10-07-O-BH                              | Proteobacteria  | Enterobacteriales  | Pasteurellaceae         | Haemophilus         | Haemophilus              | Haemophilus_aegyptius                                                   |
| ORT-AM01-02                                   | Proteobacteria  | Enterobacteriales  | Pasteurellaceae         | Haemophilus         | Haemophilus              | Haemophilus_haemolyticus                                                |
| ORT-AM04-05                                   | Proteobacteria  | Enterobacteriales  | Pasteurellaceae         | Haemophilus         | Haemophilus              | Haemophilus_quentini                                                    |
| ORT-AM05-05                                   | Proteobacteria  | Enterobacteriales  | Pasteurellaceae         | Haemophilus         | Haemophilus              | Haemophilus_sp001276515                                                 |
| ORT-AM05-101                                  | Proteobacteria  | Enterobacteriales  | Pasteurellaceae         | Haemophilus         | Haemophilus              | Haemophilus_sp00298595                                                  |
| ORT-AM05-520                                  | Proteobacteria  | Enterobacteriales  | Pasteurellaceae         | Haemophilus_A       | Haemophilus_A            | Haemophilus_A_parahaemolyticus                                          |
| ORT-AM05-529                                  | Proteobacteria  | Enterobacteriales  | Pasteurellaceae         | Haemophilus_A       | Haemophilus_A            | Haemophilus_A_sputorum                                                  |
| ORT-AM05-95                                   | Proteobacteria  | Enterobacteriales  | Pasteurellaceae         | Haemophilus_D       | Haemophilus_D            | Haemophilus_D_pittmaniae                                                |
| ORT-AM08-195                                  | Spirochaetota   | Treponematales     | Treponemataceae         | Treponema           | Treponema                | Treponema_medium                                                        |
| ORT-AM08-428                                  | Spirochaetota   | Treponematales     | Treponemataceae         | Treponema           | Treponema                | Treponema_vincetii                                                      |
| ORT-AM08-434                                  | Spirochaetota   | Treponematales     | Treponemataceae         | Treponema_B         | Treponema_B              | Treponema_B_denticola                                                   |
| ORT-AM09-12-O-104                             | Spirochaetota   | Treponematales     | Treponemataceae         | Treponema_B         | Treponema_B              | Treponema_B_denticola_A                                                 |
| ORT-AM09-20-O-104                             | Spirochaetota   | Treponematales     | Treponemataceae         | Treponema_B         | Treponema_B              | Treponema_B_putidum                                                     |
| ORT-AM09-5D4                                  | Spirochaetota   | Treponematales     | Treponemataceae         | Treponema_C         | Treponema_C              | Treponema_C_licithiolyticum                                             |
| ORT-AM09-9-O-104                              | Spirochaetota   | Treponematales     | Treponemataceae         | Treponema_C         | Treponema_C              | Treponema_C_malophilum                                                  |
| ORT-TM06-193                                  | Spirochaetota   | Treponematales     | Treponemataceae         | Treponema_D         | Treponema_D              | Treponema_D_pareidis                                                    |
| ORT-TM06-249                                  | Spirochaetota   | Treponematales     | Treponemataceae         | Treponema_D         | Treponema_D              | Treponema_D_pectinovorum                                                |
| ORT-TM07-90                                   | Spirochaetota   | Treponematales     | Treponemataceae         | Treponema_D         | Treponema_D              | Treponema_D_socranskii                                                  |
| SEQF1605                                      | Synergistota    | Synergistales      | Jethiosulfivibrionaceae | Jonquetella         | Jonquetella              | Jonquetella_anthropi                                                    |
| SEQF2016                                      | Synergistota    | Synergistales      | Jethiosulfivibrionaceae | Pyramidobacter      | Pyramidobacter           | Pyramidobacter_piscicola                                                |
| SEQF2726                                      | Synergistota    | Synergistales      | Jethiosulfivibrionaceae | Nanosynbacter       | Nanosynbacter            | Nanosynbacter_sp005370345                                               |
| RSZYD18078188_A_saliva.metaspades.bin.16      | Patescibacteria | Saccharimonadiales | Nanosynbacteraceae      | Nanosynbacter       | Nanosynbacter            | Nanosynbacter_sp005370345_RSZYD18078188_A_saliva.metaspades.bin.16      |
| RSZYD18078809_A_saliva.metaspades.bin.65      | Patescibacteria | Saccharimonadiales | Nanosynbacteraceae      | Nanosynbacter       | Nanosynbacter            | Nanosynbacter_sp005370345_RSZYD18078809_A_saliva.metaspades.bin.65      |
| RSZYD18187848_A_saliva.metaspades.bin.3       | Patescibacteria | Saccharimonadiales | Nanosynbacteraceae      | Nanosynbacter       | Nanosynbacter            | Nanosynbacter_sp005370345_RSZYD18187848_A_saliva.metaspades.bin.3       |
| Y5000298_saliva.spades.bin.49                 | Patescibacteria | Saccharimonadiales | Nanosynbacteraceae      | Nanosynbacter       | Nanosynbacter            | Nanosynbacter_sp005370345_Y5000298_saliva.spades.bin.49                 |
| GCA_905372305.1_SRR9217408-mag-bin.12_genomic | Patescibacteria | Saccharimonadiales | Nanosynbacteraceae      | Nanosynbacter       | Nanosynbacter            | Nanosynbacter_sp005372305_GCA_905372305.1_SRR9217408-mag-bin.12_genomic |
| RSZYD18187144_A_saliva.metaspades.bin.68      | Patescibacteria | Saccharimonadiales | Nanosyn                 |                     |                          |                                                                         |



|                                                                    |                 |                 |                   |                    |                       |                             |
|--------------------------------------------------------------------|-----------------|-----------------|-------------------|--------------------|-----------------------|-----------------------------|
| GCA_001790445.1_ASM179044v1_genomic                                | Patescibacteria | Saccharimonadia | Saccharimonadales | 2-12-FULL-41-12    | 2-12-FULL-41-12       | 2-12-FULL-41-12_sp001790445 |
| GCA_016219345.1_ASM1621934v1_genomic                               | Patescibacteria | Saccharimonadia | Saccharimonadales | 2-12-FULL-41-12    | JACRNE01              | JACRNE01_sp016219345        |
| GCA_004100265.1_ASM410026v1_genomic                                | Patescibacteria | Saccharimonadia | Saccharimonadales | AMD01              | AMD01                 | AMD01_sp004100265           |
| GCA_000396297.1_ASM396297v1_genomic                                | Patescibacteria | Saccharimonadia | Saccharimonadales | AWTP1-31           | AWTP1-31              | AWTP1-31_sp003962975        |
| GCA_903937695.1_freshwater_MAG --- Loc090907-1m_bin-354_genomic    | Patescibacteria | Saccharimonadia | Saccharimonadales | AWTP1-31           | AWTP1-31              | AWTP1-31_sp093949675        |
| GCA_016789455.1_ASM1678945v1_genomic                               | Patescibacteria | Saccharimonadia | Saccharimonadales | CAJKY01            | CAJKY01               | CAJKY01_sp016789455         |
| GCA_903859365.1_freshwater_MAG --- AM-lipid-O2-D3_bin-0353_genomic | Patescibacteria | Saccharimonadia | Saccharimonadales | CAIOMD01           | CAIOMD01              | CAIOMD01_sp093859365        |
| GCA_017992295.1_ASM1799229v1_genomic                               | Patescibacteria | Saccharimonadia | Saccharimonadales | CAIOMD01           | JAGOOV01              | JAGOOV01_sp017992295        |
| GCA_018062805.1_ASM1806280v1_genomic                               | Patescibacteria | Saccharimonadia | Saccharimonadales | CAIOMD01           | JAGORN01              | JAGORN01_sp018062805        |
| GCA_012965045.1_ASM1296504v1_genomic                               | Patescibacteria | Saccharimonadia | Saccharimonadales | CAIOMD01           | DTSZ01                | DTSZ01_sp012965045          |
| GCA_013694995.1_ASM1369499v1_genomic                               | Patescibacteria | Saccharimonadia | Saccharimonadales | JACDBH01           | JACDBH01              | JACDBH01_sp013694995        |
| GCA_013815785.1_ASM1381578v1_genomic                               | Patescibacteria | Saccharimonadia | Saccharimonadales | JACDF001           | JACDF001              | JACDF001_sp013815785        |
| GCA_016178135.1_ASM1617813v1_genomic                               | Patescibacteria | Saccharimonadia | Saccharimonadales | JACDF001           | JACOTW01              | JACOTW01_sp016178135        |
| GCA_016196195.1_ASM1619619v1_genomic                               | Patescibacteria | Saccharimonadia | Saccharimonadales | JACPYF01           | JACPYF01              | JACPYF01_sp016196195        |
| RDPYD18098326_A_saliva.metaspades.bin.7                            | Patescibacteria | Saccharimonadia | Saccharimonadales | Nanogingivalaceae  | Nanogingivalis        | Nanogingivalis_gingivitus   |
| GCA_010014525.1_ASM1001452v1_genomic                               | Patescibacteria | Saccharimonadia | Saccharimonadales | Nanogingivalaceae  | Nanogingivalis        | Nanogingivalis_sp010014525  |
| GCA_015257785.3_ASM1525778v3_genomic                               | Patescibacteria | Saccharimonadia | Saccharimonadales | Nanogingivalaceae  | Nanogingivalis        | Nanogingivalis_sp015257795  |
| GCA_018058565.1_ASM1805856v1_genomic                               | Patescibacteria | Saccharimonadia | Saccharimonadales | Nanogingivalaceae  | Nanogingivalis        | Nanogingivalis_sp017992295  |
| SZAXP1018280-95_RA_dental.metaspades.bin.19                        | Patescibacteria | Saccharimonadia | Saccharimonadales | Nanogingivalaceae  | Nanogingivalis        | Nanogingivalis_sp090055945  |
| RDPYD18098496_A_saliva.metaspades.bin.7                            | Patescibacteria | Saccharimonadia | Saccharimonadales | Nanoperiomorpaceae | Nanoperiomorbus       | Nanoperiomorbus_sp090055615 |
| GCA_016699895.1_ASM1669989v1_genomic                               | Patescibacteria | Saccharimonadia | Saccharimonadales | Nanoperiomorpaceae | GCA_016699895         | GCA_016699895_sp016699895   |
| GCA_004138455.1_ASM413845v1_genomic                                | Patescibacteria | Saccharimonadia | Saccharimonadales | Nanoperiomorpaceae | Nanoperiomorbus       | Nanoperiomorbus_sp090537225 |
| GCA_002313515.1_ASM231351v1_genomic                                | Patescibacteria | Saccharimonadia | Saccharimonadales | Nanoperiomorpaceae | Nanoperiomorbus       | Nanoperiomorbus_sp090537325 |
| GCA_905365345.1_ERZ1645002-mag-bin.1_genomic                       | Patescibacteria | Saccharimonadia | Saccharimonadales | Nanoperiomorpaceae | Nanoperiomorbus       | Nanoperiomorbus_sp090537325 |
| GCA_905372225.1_SRR9217401-mag-bin.8_genomic                       | Patescibacteria | Saccharimonadia | Saccharimonadales | Nanoperiomorpaceae | Nanoperiomorbus       | Nanoperiomorbus_sp090537325 |
| GCA_905373275.1_SRR9217462-mag-bin.7_genomic                       | Patescibacteria | Saccharimonadia | Saccharimonadales | Nanoperiomorpaceae | Nanoperiomorbus       | Nanoperiomorbus_sp090537325 |
| GCA_905373385.1_SRR9217464-mag-bin.2_genomic                       | Patescibacteria | Saccharimonadia | Saccharimonadales | Nanoperiomorpaceae | Nanoperiomorbus       | Nanoperiomorbus_sp090537385 |
| GCA_009776375.1_ASM977637v1_genomic                                | Patescibacteria | Saccharimonadia | Saccharimonadales | Nanoperiomorpaceae | WQXA01                | WQXA01_sp009776375          |
| GCA_009785095.1_ASM978509v1_genomic                                | Patescibacteria | Saccharimonadia | Saccharimonadales | Nanoperiomorpaceae | WQXA01                | WQXA01_sp009785095          |
| GCA_009787245.1_ASM978724v1_genomic                                | Patescibacteria | Saccharimonadia | Saccharimonadales | Nanoperiomorpaceae | WRGU01                | WRGU01_sp009787015          |
| GCA_009783235.1_ASM978323v1_genomic                                | Patescibacteria | Saccharimonadia | Saccharimonadales | Nanoperiomorpaceae | WRHN01                | WRHN01_sp009783235          |
| GCA_005697395.1_ASM569739v1_genomic                                | Patescibacteria | Saccharimonadia | Saccharimonadales | Nanosynbacteraceae | Nanosynbacter_lyticus | Nanosynbacter_lyticus       |
| GCA_002421965.1_ASM242196v1_genomic                                | Patescibacteria | Saccharimonadia | Saccharimonadales | Nanosynbacteraceae | Nanosynbacter         | Nanosynbacter_sp002421965   |
| GCA_013394755.1_ASM1339475v1_genomic                               | Patescibacteria | Saccharimonadia | Saccharimonadales | Nanosynbacteraceae | Nanosynbacter         | Nanosynbacter_sp005697215   |
| GCA_005697565.1_ASM569756v1_genomic                                | Patescibacteria | Saccharimonadia | Saccharimonadales | Nanosynbacteraceae | Nanosynbacter         | Nanosynbacter_sp005697565   |
| RSZYD18078399_A_saliva.metaspades.bin.40                           | Patescibacteria | Saccharimonadia | Saccharimonadales | Nanosynbacteraceae | Nanosynbacter         | Nanosynbacter_sp007843555   |
| GCA_010202115.1_ASM1020211v1_genomic                               | Patescibacteria | Saccharimonadia | Saccharimonadales | Nanosynbacteraceae | Nanosynbacter         | Nanosynbacter_sp010202115   |
| GCA_010202465.1_ASM1020246v1_genomic                               | Patescibacteria | Saccharimonadia | Saccharimonadales | Nanosynbacteraceae | Nanosynbacter         | Nanosynbacter_sp010202465   |
| GCA_010202645.1_ASM1020264v1_genomic                               | Patescibacteria | Saccharimonadia | Saccharimonadales | Nanosynbacteraceae | Nanosynbacter         | Nanosynbacter_sp010202645   |
| GCA_010202845.1_ASM1020284v1_genomic                               | Patescibacteria | Saccharimonadia | Saccharimonadales | Nanosynbacteraceae | Nanosynbacter         | Nanosynbacter_sp010202845   |
| GCA_013099015.1_ASM1309901v1_genomic                               | Patescibacteria | Saccharimonadia | Saccharimonadales | Nanosynbacteraceae | Nanosynbacter         | Nanosynbacter_sp013099015   |
| GCA_013099195.1_ASM1309919v1_genomic                               | Patescibacteria | Saccharimonadia | Saccharimonadales | Nanosynbacteraceae | Nanosynbacter         | Nanosynbacter_sp013099195   |
| GCA_013100805.1_ASM1310080v1_genomic                               | Patescibacteria | Saccharimonadia | Saccharimonadales | Nanosynbacteraceae | Nanosynbacter         | Nanosynbacter_sp013100805   |
| GCA_013100825.1_ASM1310082v1_genomic                               | Patescibacteria | Saccharimonadia | Saccharimonadales | Nanosynbacteraceae | Nanosynbacter         | Nanosynbacter_sp013100825   |
| GCA_015257705.1_ASM1525770v1_genomic                               | Patescibacteria | Saccharimonadia | Saccharimonadales | Nanosynbacteraceae | Nanosynbacter         | Nanosynbacter_sp015257705   |
| GCA_90055265.1_UMGS1805_genomic                                    | Patescibacteria | Saccharimonadia | Saccharimonadales | Nanosynbacteraceae | Nanosynbacter         | Nanosynbacter_sp090055265   |
| RSZYD18187853_A_saliva.metaspades.bin.37                           | Patescibacteria | Saccharimonadia | Saccharimonadales | Nanosynbacteraceae | Nanosynbacter         | Nanosynbacter_sp090055425   |
| GCA_022828245.1_ASM2282824v1_genomic                               | Patescibacteria | Saccharimonadia | Saccharimonadales | Nanosynbacteraceae | Nanosynbacter         | Nanosynbacter_sp090055675   |
| GCA_022819385.1_ASM2281938v1_genomic                               | Patescibacteria | Saccharimonadia | Saccharimonadales | Nanosynbacteraceae | Nanosynbacter         | Nanosynbacter_sp090055885   |
| RSZYD18187554_A_saliva.metaspades.bin.21                           | Patescibacteria | Saccharimonadia | Saccharimonadales | Nanosynbacteraceae | Nanosynbacter         | Nanosynbacter_sp090055885   |
| GCA_022819345.1_ASM2281934v1_genomic                               | Patescibacteria | Saccharimonadia | Saccharimonadales | Nanosynbacteraceae | Nanosynbacter         | Nanosynbacter_sp090055795   |
| GCA_905372835.1_SRR9217428-mag-bin.30_genomic                      | Patescibacteria | Saccharimonadia | Saccharimonadales | Nanosynbacteraceae | Nanosynbacter         | Nanosynbacter_sp0905372835  |
| GCA_905373795.1_SRR9217490-mag-bin.5_genomic                       | Patescibacteria | Saccharimonadia | Saccharimonadales | Nanosynbacteraceae | Nanosynbacter         | Nanosynbacter_sp0905373795  |
| R0170300181_tooth_RA.megahit.bin.83                                | Patescibacteria | Saccharimonadia | Saccharimonadales | Nanosynbacteraceae | VGLK01                | VGLK01_sp0170300181         |
| GCA_016866755.1_JGI_2017-08-21_genomic                             | Patescibacteria | Saccharimonadia | Saccharimonadales | Nanosynbacteraceae | VGLK01                | VGLK01_sp016866755          |
| R0170300272_tooth_RA.megahit.bin.12                                | Patescibacteria | Saccharimonadia | Saccharimonadales | Nanosynbacteraceae | VGLK01                | VGLK01_sp0905372785         |
| GCA_004138395.1_ASM413839v1_genomic                                | Patescibacteria | Saccharimonadia | Saccharimonadales | Nanosynbacteraceae | Nanosynbacter         | Nanosynbacter_sp004138395   |
| GCA_947168545.1_SRR8387715_bin.82_metaWRAP_v1.3_MAG_genomic        | Patescibacteria | Saccharimonadia | Saccharimonadales | Nanosynbacteraceae | Nanosynbacter         | Nanosynbacter_sp002350545   |
| GCA_002363125.1_ASM236312v1_genomic                                | Patescibacteria | Saccharimonadia | Saccharimonadales | Nanosynbacteraceae | Nanosynbacter         | Nanosynbacter_sp002363125   |
| GCA_002371235.1_ASM237123v1_genomic                                | Patescibacteria | Saccharimonadia | Saccharimonadales | Nanosynbacteraceae | Nanosynbacter         | Nanosynbacter_sp002371235   |
| GCA_947306835.1_SRR10912542_bin.23_metaWRAP_v1.3_MAG_genomic       | Patescibacteria | Saccharimonadia | Saccharimonadales | Nanosynbacteraceae | Nanosynbacter         | Nanosynbacter_sp002333165   |
| GCA_003979185.1_ASM397918v1_genomic                                | Patescibacteria | Saccharimonadia | Saccharimonadales | Nanosynbacteraceae | Nanosynbacter         | Nanosynbacter_sp003979185   |
| GCA_947171955.1_SRR14862904_bin.27_metawrap_v1.3_MAG_genomic       | Patescibacteria | Saccharimonadia | Saccharimonadales | Nanosynbacteraceae | Nanosynbacter         | Nanosynbacter_sp013316435   |
| GCA_013332952.1_ASM1333295v2_genomic                               | Patescibacteria | Saccharimonadia | Saccharimonadales | Nanosynbacteraceae | Nanosynbacter         | Nanosynbacter_sp013332955   |
| GCA_013333372.1_ASM1333337v2_genomic                               | Patescibacteria | Saccharimonadia | Saccharimonadales | Nanosynbacteraceae | Nanosynbacter         | Nanosynbacter_sp013333375   |
| GCA_015257445.1_ASM1525744v1_genomic                               | Patescibacteria | Saccharimonadia | Saccharimonadales | Nanosynbacteraceae | Nanosynbacter         | Nanosynbacter_sp015257445   |
| GCA_015257485.1_ASM1525748v1_genomic                               | Patescibacteria | Saccharimonadia | Saccharimonadales | Nanosynbacteraceae | Nanosynbacter         | Nanosynbacter_sp015257485   |
| GCA_016280905.1_ASM1628090v1_genomic                               | Patescibacteria | Saccharimonadia | Saccharimonadales | Nanosynbacteraceae | Nanosynbacter         | Nanosynbacter_sp016280905   |
| GCA_016286785.1_ASM1628678v1_genomic                               | Patescibacteria | Saccharimonadia | Saccharimonadales | Nanosynbacteraceae | Nanosynbacter         | Nanosynbacter_sp016286785   |
| GCA_017404325.1_ASM1740432v1_genomic                               | Patescibacteria | Saccharimonadia | Saccharimonadales | Nanosynbacteraceae | Nanosynbacter         | Nanosynbacter_sp017404325   |
| GCA_017404335.1_ASM1740433v1_genomic                               | Patescibacteria | Saccharimonadia | Saccharimonadales | Nanosynbacteraceae | Nanosynbacter         | Nanosynbacter_sp017404335   |
| GCA_017404515.1_ASM1740451v1_genomic                               | Patescibacteria | Saccharimonadia | Saccharimonadales | Nanosynbacteraceae | Nanosynbacter         | Nanosynbacter_sp017404515   |
| GCA_017404685.1_ASM1740468v1_genomic                               | Patescibacteria | Saccharimonadia | Saccharimonadales | Nanosynbacteraceae | Nanosynbacter         | Nanosynbacter_sp017404685   |
| GCA_017404725.1_ASM1740472v1_genomic                               | Patescibacteria | Saccharimonadia | Saccharimonadales | Nanosynbacteraceae | Nanosynbacter         | Nanosynbacter_sp017404725   |
| GCA_017404795.1_ASM1740479v1_genomic                               | Patescibacteria | Saccharimonadia | Saccharimonadales | Nanosynbacteraceae | Nanosynbacter         | Nanosynbacter_sp017404795   |
| GCA_017404935.1_ASM1740493v1_genomic                               | Patescibacteria | Saccharimonadia | Saccharimonadales | Nanosynbacteraceae | Nanosynbacter         | Nanosynbacter_sp017404935   |
| GCA_017404955.1_ASM1740495v1_genomic                               | Patescibacteria | Saccharimonadia | Saccharimonadales | Nanosynbacteraceae | Nanosynbacter         | Nanosynbacter_sp017404955   |
| GCA_017405225.1_ASM1740522v1_genomic                               | Patescibacteria | Saccharimonadia | Saccharimonadales | Nanosynbacteraceae | Nanosynbacter         | Nanosynbacter_sp017405225   |
| GCA_017406405.1_ASM1740640v1_genomic                               | Patescibacteria | Saccharimonadia | Saccharimonadales | Nanosynbacteraceae | Nanosynbacter         | Nanosynbacter_sp017406405   |
| GCA_017406565.1_ASM1740656v1_genomic                               | Patescibacteria | Saccharimonadia | Saccharimonadales | Nanosynbacteraceae | Nanosynbacter         | Nanosynbacter_sp017406565   |
| GCA_017406775.1_ASM1740677v1_genomic                               | Patescibacteria | Saccharimonadia | Saccharimonadales | Nanosynbacteraceae | Nanosynbacter         | Nanosynbacter_sp017406775   |
| GCA_017406905.1_ASM1740690v1_genomic                               | Patescibacteria | Saccharimonadia | Saccharimonadales | Nanosynbacteraceae | Nanosynbacter         | Nanosynbacter_sp017406905   |
| GCA_017406985.1_ASM1740698v1_genomic                               | Patescibacteria | Saccharimonadia | Saccharimonadales | Nanosynbacteraceae | Nanosynbacter         | Nanosynbacter_sp017406985   |
| GCA_947303265.1_SRR10912539_bin.36_metaWRAP_v1.3_MAG_genomic       | Patescibacteria | Saccharimonadia | Saccharimonadales | Nanosynbacteraceae | Nanosynbacter         | Nanosynbacter_sp017420185   |
| GCA_017421325.1_ASM1742132v1_genomic                               | Patescibacteria | Saccharimonadia | Saccharimonadales | Nanosynbacteraceae | Nanosynbacter         | Nanosynbacter_sp017421325   |
| GCA_017421685.1_ASM1742168v1_genomic                               | Patescibacteria | Saccharimonadia | Saccharimonadales | Nanosynbacteraceae | Nanosynbacter         | Nanosynbacter_sp017421685   |
| GCA_017431465.1_ASM1743146v1_genomic                               | Patescibacteria | Saccharimonadia | Saccharimonadales | Nanosynbacteraceae | Nanosynbacter         | Nanosynbacter_sp017431465   |
| GCA_017431745.1_ASM1743174v1_genomic                               | Patescibacteria | Saccharimonadia | Saccharimonadales | Nanosynbacteraceae | Nanosynbacter         | Nanosynbacter_sp017431745   |
| GCA_017431945.1_ASM1743194v1_genomic                               | Patescibacteria | Saccharimonadia | Saccharimonadales | Nanosynbacteraceae | Nanosynbacter         | Nanosynbacter_sp017431945   |
| GCA_017431955.1_ASM1743195v1_genomic                               | Patescibacteria | Saccharimonadia | Saccharimonadales | Nanosynbacteraceae | Nanosynbacter         | Nanosynbacter_sp017431955   |
| GCA_017432025.1_ASM1743202v1_genomic                               | Patescibacteria | Saccharimonadia | Saccharimonadales | Nanosynbacteraceae | Nanosynbacter         | Nanosynbacter_sp017432025   |
| GCA_017432225.1_ASM1743222v1_genomic                               | Patescibacteria | Saccharimonadia | Saccharimonadales | Nanosynbacteraceae | Nanosynbacter         | Nanosynbacter_sp017432225   |
| GCA_017432305.1_ASM1743230v1_genomic                               | Patescibacteria | Saccharimonadia | Saccharimonadales | Nanosynbacteraceae | Nanosynbacter         | Nanosynbacter_sp017432305   |
| GCA_017432365.1_ASM1743236v1_genomic                               | Patescibacteria | Saccharimonadia | Saccharimonadales | Nanosynbacteraceae | Nanosynbacter         | Nanosynbacter_sp017432365   |
| GCA_017432425.1_ASM1743242v1_genomic                               | Patescibacteria | Saccharimonadia | Saccharimonadales | Nanosynbacteraceae | Nanosynbacter         | Nanosynbacter_sp017432425   |
| GCA_017433855.1_ASM1743385v1_genomic                               | Patescibacteria | Saccharimonadia | Saccharimonadales | Nanosynbacteraceae | Nanosynbacter         | Nanosynbacter_sp017433855   |
| GCA_017447485.1_ASM1744748v1_genomic                               | Patescibacteria | Saccharimonadia | Saccharimonadales | Nanosynbacteraceae | Nanosynbacter         | Nanosynbacter_sp017447485   |
| GCA_017459705.1_ASM1745970v1_genomic                               | Patescibacteria | Saccharimonadia | Saccharimonadales | Nanosynbacteraceae | Nanosynbacter         | Nanosynbacter_sp017459705   |
| GCA_017459845.1_ASM1745984v1_genomic                               | Patescibacteria | Saccharimonadia | Saccharimonadales | Nanosynbacteraceae | Nanosynbacter         | Nanosynbacter_sp017459845   |
| GCA_017460305.1_ASM1746030v1_genomic                               | Patescibacteria | Saccharimonadia | Saccharimonadales | Nanosynbacteraceae | Nanosynbacter         | Nanosynbacter_sp017460305   |
| GCA_017460105.1_ASM1746010v1_genomic                               | Patescibacteria | Saccharimonadia | Saccharimonadales | Nanosynbacteraceae | Nanosynbacter         | Nanosynbacter_sp017460105   |
| GCA_017460225.1_ASM1746022v1_genomic                               | Patescibacteria | Saccharimonadia | Saccharimonadales | Nanosynbacteraceae | Nanosynbacter         | Nanosynbacter_sp017460225   |
| GCA_017460625.1_ASM1746062v1_genomic                               | Patescibacteria | Saccharimonadia | Saccharimonadales | Nanosynbacteraceae | Nanosynbacter         | Nanosynbacter_sp017460625   |
| GCA_946409605.1_SRR12081300_bin.39_metaWRAP_v1.3_MAG_genomic       | Patescibacteria | Saccharimonadia | Saccharimonadales | Nanosynbacteraceae | Nanosynbacter         | Nanosynbacter_sp017460225   |
| GCA_017480035.1_ASM1748003v1_genomic                               | Patescibacteria | Saccharimonadia | Saccharimonadales | Nanosynbacteraceae | Nanosynbacter         | Nanosynbacter_sp017464135   |
| GCA_017480095.1_ASM1748009v1_genomic                               | Patescibacteria | Saccharimonadia | Saccharimonadales | Nanosynbacteraceae | Nanosynbacter         | Nanosynbacter_sp017480035   |
| GCA_017506895.1_ASM1750689v1_genomic                               | Patescibacteria | Saccharimonadia | Saccharimonadales | Nanosynbacteraceae | Nanosynbacter         | Nanosynbacter_sp017480095   |
| GCA_017509895.1_ASM1750989v1_genomic                               | Patescibacteria | Saccharimonadia | Saccharimonadales | Nanosynbacteraceae | Nanosynbacter         | Nanosynbacter_sp017506895   |
| GCA_017510075.1_ASM1751007v1_genomic                               | Patescibacteria | Saccharimonadia | Saccharimonadales | Nanosynbacteraceae | Nanosynbacter         | Nanosynbacter_sp017509895   |
| GCA_017510425.1_ASM1751042v1_genomic                               | Patescibacteria | Saccharimonadia | Saccharimonadales | Nanosynbacteraceae | Nanosynbacter         | Nanosynbacter_sp017510075   |
|                                                                    |                 |                 |                   |                    |                       |                             |

















# Supplementary Table 6a. Bacterial relative abundance LfSe analysis between the RA and HC groups.

| Cluster           | Logarithm value (log10) | Enrichment group | LDA value   | P value     |
|-------------------|-------------------------|------------------|-------------|-------------|
| SEQF1680          | 2.89336258              | HC               | 2.164930646 | 0.02170646  |
| SEQF1879          | 2.72450513              | HC               | 2.017836212 | 0.000639404 |
| SEQF2820          | 2.960225873             | HC               | 2.176321995 | 0.024312488 |
| SEQF1160          | 2.925493797             | HC               | 2.205702241 | 0.00860113  |
| SEQF2555          | 3.223942841             | HC               | 2.554646613 | 0.008068989 |
| SEQF2822          | 2.993918102             | HC               | 2.357074254 | 0.000274661 |
| SEQF2529          | 3.287514866             | HC               | 2.481937695 | 0.0257143   |
| SEQF2212          | 3.346611168             | HC               | 2.43560349  | 0.020893558 |
| SEQF1719          | 3.676602522             | HC               | 3.404704335 | 5.37E-10    |
| ORS_TM06_96       | 3.345905004             | HC               | 2.642173265 | 0.001284473 |
| SEQF1500          | 2.732357637             | HC               | 2.444977591 | 1.76E-10    |
| SEQF2520          | 3.523475585             | HC               | 2.888799175 | 0.000622669 |
| SEQF1997          | 3.29540186              | HC               | 2.507613906 | 0.026196853 |
| SEQF2020          | 3.368344203             | HC               | 2.633297177 | 7.86E-05    |
| ORS_AM05_478      | 4.020757655             | HC               | 3.265803029 | 0.040360685 |
| SEQF1998          | 3.532037872             | HC               | 2.869884998 | 0.012761249 |
| SEQF2298          | 3.551344765             | HC               | 2.762200423 | 0.026687213 |
| SEQF1018          | 3.225209549             | HC               | 2.655980853 | 0.003974739 |
| SEQF2789          | 3.434652366             | HC               | 2.986075338 | 6.56E-05    |
| ODP_AM05_394      | 3.19487366              | HC               | 2.561266586 | 4.98E-05    |
| ORT_AM01_08MB     | 3.315561061             | HC               | 2.475477533 | 0.015598398 |
| SEQF2017          | 3.209617929             | HC               | 2.56190573  | 2.12E-05    |
| ORS_AM09_43_O_BH  | 3.661705474             | HC               | 2.871075552 | 0.018976381 |
| SEQF1070          | 3.353039012             | HC               | 2.75766582  | 1.58E-05    |
| SEQF2011          | 3.262156957             | HC               | 2.629516824 | 9.98E-06    |
| SEQF2013          | 3.277625053             | HC               | 2.671605534 | 3.98E-06    |
| ORS_TM07_52       | 3.345537433             | HC               | 2.620388069 | 2.41E-05    |
| ORS_TM07_39       | 3.525045803             | HC               | 2.739840571 | 0.000729534 |
| ORS_AM09_28_BH    | 3.493629584             | HC               | 2.711041456 | 0.000150839 |
| SEQF2071          | 3.932126685             | HC               | 3.215383031 | 0.014693995 |
| SEQF1477          | 2.932096352             | HC               | 2.173591762 | 0.017901463 |
| SEQF1648          | 3.324131615             | HC               | 2.493458911 | 0.013289088 |
| ODP_AM05_113      | 4.073395808             | HC               | 3.577755532 | 0.000590415 |
| SEQF3062          | 2.72931211              | HC               | 2.297932498 | 0.000155283 |
| SEQF2575          | 2.838011328             | HC               | 2.033269812 | 0.018611965 |
| SEQF2745          | 2.942376861             | HC               | 2.295994295 | 0.000155283 |
| SEQF1849          | 3.096691991             | HC               | 2.366870409 | 0.005331025 |
| SEQF1668          | 3.108142885             | HC               | 2.202627285 | 0.01225205  |
| SEQF2385          | 3.010714395             | HC               | 2.556293242 | 1.48E-07    |
| SEQF2573          | 3.237175174             | HC               | 2.552847315 | 0.000544939 |
| SEQF3095          | 3.529097899             | HC               | 2.812142197 | 0.000656556 |
| ODP_AM08_379      | 3.562021329             | HC               | 2.88358659  | 0.002156126 |
| SEQF2310          | 3.099139812             | HC               | 2.533862369 | 0.002738564 |
| SEQF1660          | 2.996259492             | HC               | 2.353080065 | 0.018611965 |
| SEQF1604          | 2.656456129             | HC               | 2.207690345 | 1.53E-06    |
| SEQF2748          | 2.771721627             | HC               | 2.061937797 | 0.028206142 |
| SEQF2899          | 3.074235157             | HC               | 2.486231475 | 0.000656556 |
| ORS_AM05_334      | 3.649650322             | HC               | 3.11827513  | 0.001103418 |
| SEQF1195          | 3.948187112             | HC               | 3.23402347  | 0.005698138 |
| SEQF2615          | 2.807738031             | HC               | 2.265771793 | 7.86E-05    |
| SEQF2079          | 3.14580774              | HC               | 2.706090948 | 8.61E-05    |
| SEQF1967          | 4.139136769             | HC               | 3.669569981 | 5.29E-05    |
| SEQF1276          | 3.228462669             | HC               | 2.641225372 | 0.000383078 |
| SEQF1175          | 3.852642392             | HC               | 3.365309183 | 0.000122928 |
| SEQF1264          | 4.125874398             | HC               | 3.663415267 | 0.000106055 |
| ORT_AM05_52       | 3.880151635             | HC               | 3.407611093 | 3.11E-05    |
| ORS_AM09_16_O_BH  | 4.074225122             | HC               | 3.636713334 | 5.63E-05    |
| SEQF2159          | 3.144577364             | HC               | 2.559841109 | 0.001075644 |
| ORT_AF10_25_O_BH  | 4.38091833              | HC               | 3.622099193 | 0.012761249 |
| SEQF1659          | 3.688570877             | HC               | 3.199068395 | 9.98E-06    |
| SEQF1944          | 2.924441078             | HC               | 2.469342455 | 3.32E-05    |
| SEQF1165          | 4.265947676             | HC               | 3.558786868 | 0.005098294 |
| SEQF2142          | 4.268676467             | HC               | 3.641092862 | 0.002550288 |
| ORT_AM05_529      | 3.25385489              | HC               | 2.474370449 | 0.007566516 |
| ORT_AM05_05       | 3.652466476             | HC               | 2.936455714 | 0.017555207 |
| ORT_AM04_05       | 3.368771466             | HC               | 2.495601876 | 0.014693995 |
| ORT_AF04_16       | 3.416633612             | HC               | 2.590931537 | 0.008973106 |
| ORS_AM01_02MB     | 3.0421044               | HC               | 2.43919197  | 9.33E-06    |
| ORS_AM05_133      | 3.276249142             | HC               | 2.466245454 | 0.006501514 |
| ORS_TM07_227      | 3.26511322              | HC               | 2.422246478 | 0.023415177 |
| ORS_AM09_1_O_104  | 3.347067074             | HC               | 2.405719555 | 0.017214836 |
| ORS_AM09_24_O_104 | 3.895836927             | HC               | 3.22310363  | 0.00053052  |
| SEQF1575          | 3.192573173             | HC               | 2.643894368 | 2.05E-05    |
| SEQF3533          | 3.448632555             | HC               | 2.83771709  | 0.009359381 |
| SEQF2022          | 2.619028366             | HC               | 2.129866276 | 0.003884672 |
| SEQF3068          | 3.156888858             | HC               | 2.468654469 | 0.030346852 |
| SEQF3206          | 3.710569886             | HC               | 3.371568685 | 1.52E-08    |
| SEQF1072          | 3.429166782             | HC               | 2.99839018  | 4.68E-05    |
| SEQF2357          | 3.510803876             | HC               | 2.96444525  | 0.000159849 |
| ODP_AM08_289      | 3.08501439              | HC               | 2.254561777 | 0.011056986 |
| ODP_AM08_386      | 2.930507968             | HC               | 2.297915268 | 7.37E-06    |
| ODP_AM04_45       | 3.208229265             | HC               | 2.414183397 | 0.014693995 |
| ORS_AM01_02BB     | 3.308780372             | HC               | 2.42026061  | 0.023860174 |
| ODP_TM07_145      | 3.199096674             | HC               | 2.455847903 | 0.013022803 |



|                                              |             |    |             |             |
|----------------------------------------------|-------------|----|-------------|-------------|
| R0170300248_tooth_RAH_megahit_bin_109        | 2.468536542 | HC | 2.173750315 | 0.002831865 |
| ORT_AM08_434                                 | 3.264564951 | HC | 2.539189305 | 0.000130361 |
| SEQF1605                                     | 3.188150292 | HC | 2.444707484 | 0.017555207 |
| ORT_AM09_12_O_104                            | 3.276150644 | HC | 2.347457183 | 0.034429573 |
| SEQF1947                                     | 2.694272027 | HC | 2.236018003 | 5.63E-05    |
| SEQF1870                                     | 2.772390341 | HC | 2.273804771 | 2.57E-05    |
| SEQF1875                                     | 2.919769109 | HC | 2.436861323 | 6.22E-06    |
| SEQF1940                                     | 2.961386514 | HC | 2.476312214 | 1.80E-05    |
| SEQF2775                                     | 3.000677276 | HC | 2.3461686   | 0.001075644 |
| SEQF2774                                     | 2.95382694  | HC | 2.395123043 | 0.029798991 |
| SEQF2918                                     | 2.768148038 | HC | 2.268900988 | 0.00249021  |
| SEQF1850                                     | 2.77921597  | HC | 2.08742866  | 0.002104619 |
| SEQF2997                                     | 2.724916329 | HC | 2.02754711  | 0.00249021  |
| SEQF2076                                     | 2.882928198 | HC | 2.216935571 | 0.001350674 |
| SEQF3061                                     | 2.830654897 | HC | 2.119214528 | 0.006940235 |
| SEQF1957                                     | 3.164174987 | HC | 2.630347687 | 7.37E-06    |
| SEQF1221                                     | 2.762619955 | HC | 2.201624038 | 2.26E-05    |
| SEQF2776                                     | 2.951141613 | HC | 2.413012729 | 7.40E-05    |
| SEQF2445                                     | 3.1450066   | HC | 2.601942    | 3.64E-05    |
| SEQF2016                                     | 3.26083343  | HC | 2.807056625 | 1.28E-06    |
| SEQF1259                                     | 2.568600305 | RA | 2.112165845 | 0.015291632 |
| ODP_AF08_22_MRS                              | 3.626212777 | RA | 2.811569688 | 0.01225205  |
| ORT_AM09_10_104                              | 3.95137997  | RA | 3.09646909  | 0.020107316 |
| SEQF1616                                     | 2.808786013 | RA | 2.186772383 | 0.000729534 |
| SEQF2564                                     | 3.693596342 | RA | 3.044884977 | 0.008785359 |
| SEQF1881                                     | 2.926915953 | RA | 2.157755216 | 0.010608731 |
| SEQF1685                                     | 3.990971685 | RA | 3.544405744 | 4.13E-05    |
| SEQF1854                                     | 2.90705674  | RA | 2.025420616 | 0.015598398 |
| SEQF1914                                     | 3.291699342 | RA | 2.652109066 | 0.00131719  |
| SEQF2481                                     | 3.564892661 | RA | 2.813190528 | 0.002262624 |
| SEQF2777                                     | 3.075291654 | RA | 2.172896462 | 0.010390723 |
| SEQF3053                                     | 4.083188636 | RA | 3.273781341 | 0.010830797 |
| SEQF2744                                     | 4.141786158 | RA | 3.311620571 | 0.006360916 |
| SEQF1159                                     | 4.239410948 | RA | 3.547535025 | 0.000245442 |
| ORT_AF08_35_MRS                              | 3.760564418 | RA | 2.94952551  | 0.014117042 |
| ODP_AM09_2D21                                | 4.217385551 | RA | 3.607601776 | 1.99E-05    |
| SEQF1852                                     | 3.750610681 | RA | 3.092478229 | 0.01152199  |
| SEQF1084                                     | 3.015244042 | RA | 2.388011405 | 7.86E-05    |
| ORS_AM05_475                                 | 4.280231005 | RA | 3.993763974 | 2.52E-06    |
| ORT_AF05_174                                 | 4.261444052 | RA | 3.586764969 | 0.032625678 |
| SEQF2031                                     | 4.495991038 | RA | 3.89813273  | 0.000831351 |
| SEQF2739                                     | 2.807049134 | RA | 2.109797356 | 0.027691756 |
| SEQF1647                                     | 3.335475967 | RA | 2.533926194 | 0.005955389 |
| ORS_AM09_18_BH                               | 3.615903668 | RA | 2.792636505 | 0.027691756 |
| SEQF1948                                     | 3.875132023 | RA | 3.363602411 | 3.01E-06    |
| ORT_AF03_41                                  | 3.916861255 | RA | 3.079405697 | 0.027185481 |
| ORS_AM09_12_BH                               | 4.049526109 | RA | 3.517817774 | 0.001455894 |
| ORS_TM06_107                                 | 4.217329456 | RA | 3.569832916 | 0.047136419 |
| ORT_AF03_190                                 | 3.399318523 | RA | 2.801356093 | 9.99E-05    |
| ORT_AF05_233                                 | 3.393862673 | RA | 2.771947766 | 9.42E-05    |
| ORT_AF05_232                                 | 3.852896147 | RA | 3.112112984 | 0.036966793 |
| ORS_AM05_364                                 | 3.857095939 | RA | 3.160152426 | 0.006644901 |
| ORS_AM05_381                                 | 3.975732084 | RA | 3.395956359 | 4.13E-05    |
| ORS_TM06_130                                 | 3.431086724 | RA | 2.829725885 | 0.000142309 |
| ORS_AM08_79                                  | 3.435696465 | RA | 2.843497485 | 0.000126593 |
| SEQF3063                                     | 4.044782785 | RA | 3.47861202  | 0.003228236 |
| SEQF1989                                     | 3.879471481 | RA | 3.077951523 | 0.008243001 |
| SEQF1663                                     | 3.555532212 | RA | 2.888790334 | 0.028728741 |
| SEQF2149                                     | 3.627114908 | RA | 3.056077017 | 0.000383078 |
| ODP_AM04_97                                  | 3.839106951 | RA | 3.255211996 | 0.005825483 |
| ORS_AF04_134                                 | 3.271311058 | RA | 2.681175877 | 4.98E-05    |
| RSZYD18187554_A_saliva_metaspades_bin_21     | 2.616783953 | RA | 2.217807472 | 0.001773268 |
| RSZYD18078673_A_saliva_metaspades_bin_3      | 2.54551385  | RA | 2.138736623 | 0.000574036 |
| RSZAXPI002682_32_RA_saliva_metaspades_bin_12 | 2.578070106 | RA | 2.156434606 | 0.000219116 |
| RDPYD18189925_A_saliva_metaspades_bin_14     | 2.480242066 | RA | 2.012134422 | 0.00615346  |
| GCA_022819385_1_ASM2281938v1_genomic         | 2.561206646 | RA | 2.178632273 | 0.001885859 |
| RSZYD18187676_A_saliva_metaspades_bin_32     | 2.549721705 | RA | 2.153372892 | 0.000768662 |
| RDPYD18075172_A_saliva_metaspades_bin_27     | 2.602346303 | RA | 2.123369192 | 0.002052844 |
| RSZYD18187171_A_saliva_metaspades_bin_47     | 2.60946628  | RA | 2.155418385 | 0.005510277 |
| ORT_TM07_90                                  | 3.313034474 | RA | 2.70001037  | 0.000126593 |
| ORT_AM09_5D4                                 | 3.764325525 | RA | 3.134099394 | 1.48E-05    |
| SEQF1683                                     | 3.386697716 | RA | 2.558355531 | 0.009760424 |
| SEQF2726                                     | 3.291562673 | RA | 2.691075099 | 0.000115895 |
| SEQF2558                                     | 2.267552417 |    |             | -           |
| SEQF1783                                     | 2.324963796 |    |             | -           |
| SEQF2809                                     | 1.042448038 |    |             | -           |
| SEQF1533                                     | 1.822261581 |    |             | -           |
| SEQF1255                                     | 1.548523304 |    |             | -           |
| ORS_AF03_140                                 | 1.484763228 |    |             | 0.000142309 |
| SEQF2569                                     | 0.603847897 |    |             | -           |
| SEQF1930                                     | 1.804822108 |    |             | -           |
| SEQF1262                                     | 1.730862053 |    |             | 5.81E-06    |
| SEQF2670                                     | 1.219610991 |    |             | -           |
| SEQF2841                                     | 2.575995963 |    |             | 0.007247307 |
| SEQF2814                                     | 2.694472012 |    |             | 0.012761249 |
| SEQF1287                                     | 2.444577936 |    |             | 0.044778663 |
| SEQF2353                                     | 2.071516792 |    |             | -           |
| SEQF3159                                     | 2.226540326 |    |             | -           |
| SEQF2581                                     | 2.268914576 |    |             | -           |
| ODP_AM05_423                                 | 2.351528931 |    |             | -           |
| SEQF2501                                     | 2.335029339 |    |             | -           |
| SEQF2920                                     | 2.76583261  |    |             | -           |
| SEQF1924                                     | 2.047663297 |    |             | 0.000574878 |
| ORS_AF03_170                                 | 3.525532236 |    |             | -           |

|                   |             |             |
|-------------------|-------------|-------------|
| SEQF2592          | 2.758532403 | -           |
| ORS_AM09_22_104   | 3.392995974 | -           |
| SEQF2398          | 3.290139577 | -           |
| SEQF2767          | 3.140251261 | -           |
| SEQF1999          | 3.180913927 | -           |
| ODP_AM09_33_BH    | 3.539281756 | -           |
| SEQF2215          | 3.363520987 | -           |
| ORT_AM08_210      | 1.77271356  | 2.04E-06    |
| SEQF2589          | 3.222019325 | -           |
| SEQF2221          | 3.17501576  | -           |
| SEQF2397          | 3.254672683 | -           |
| SEQF1066          | 3.438002939 | -           |
| SEQF2588          | 3.186559379 | -           |
| ODP_AF10_C23      | 3.602615525 | -           |
| SEQF1836          | 0.928922872 | -           |
| SEQF2442          | 0.61526141  | -           |
| SEQF1839          | 0.585111341 | -           |
| ORS_AM05_336      | 0.9374618   | -           |
| SEQF1324          | 1.164008949 | -           |
| SEQF1959          | 0.953847673 | -           |
| SEQF2204          | 0.889200004 | -           |
| SEQF2607          | 1.307556532 | 0.010608731 |
| SEQF2553          | 1.261785275 | 0.00375293  |
| SEQF2460          | 1.671311914 | -           |
| SEQF2855          | 2.408642659 | -           |
| SEQF2505          | 1.749595009 | -           |
| SEQF3175          | 1.744317987 | -           |
| SEQF1880          | 2.700921519 | -           |
| SEQF2783          | 1.798516863 | 0.046339157 |
| SEQF3164          | 1.665245039 | -           |
| SEQF1676          | 2.868969357 | -           |
| SEQF1890          | 1.506366163 | -           |
| SEQF1993          | 2.444311284 | -           |
| SEQF1921          | 2.077987282 | -           |
| SEQF2446          | 2.137134875 | 0.015910565 |
| SEQF1912          | 2.094673646 | 0.000174319 |
| SEQF3052          | 1.992744249 | 0.000946219 |
| SEQF1603          | 2.341762416 | -           |
| SEQF1697          | 1.953349049 | -           |
| SEQF1029          | 3.257619744 | -           |
| SEQF1103          | 3.37295475  | -           |
| SEQF2454          | 2.096469455 | -           |
| SEQF1045          | 2.951876743 | -           |
| SEQF1859          | 2.760639636 | 0.032042649 |
| SEQF2443          | 2.443162497 | 0.000809989 |
| SEQF3179          | 2.276378167 | -           |
| SEQF1672          | 2.231386345 | 0.048765584 |
| SEQF3473          | 1.874728826 | 0.048765584 |
| SEQF1951          | 2.298852783 | -           |
| SEQF1673          | 2.541283848 | -           |
| SEQF1958          | 2.409971277 | -           |
| SEQF2760          | 2.128799648 | -           |
| SEQF2919          | 2.287878202 | -           |
| SEQF1478          | 2.248820821 | 0.016551421 |
| SEQF2805          | 2.458929098 | -           |
| SEQF2247          | 2.756880604 | -           |
| SEQF3171          | 3.159183595 | -           |
| SEQF1358          | 1.987181828 | 0.026687213 |
| SEQF3398          | 2.806978129 | -           |
| SEQF1596          | 2.424148273 | -           |
| SEQF2787          | 3.26501418  | -           |
| SEQF1690          | 2.58662326  | -           |
| SEQF2811          | 2.703049627 | 9.14E-05    |
| SEQF1695          | 3.14621053  | -           |
| SEQF1019          | 3.557250792 | -           |
| SEQF2342          | 3.196916612 | -           |
| ORT_AM09_21_O_104 | 3.181030615 | -           |
| SEQF1598          | 3.03993433  | -           |
| ORS_AM09_2_104    | 2.645905387 | -           |
| ODP_AM05_456      | 2.678032394 | -           |
| ODP_AF06_108      | 3.272573644 | -           |
| ORS_AF10_22_BH    | 3.305651791 | -           |
| SEQF1847          | 2.859059153 | 0.005573308 |
| SEQF1393          | 3.271581645 | -           |
| SEQF2905          | 3.313507013 | -           |
| SEQF2005          | 3.261177725 | -           |
| ORS_TM06_36       | 3.314549237 | -           |
| SEQF2009          | 3.308220713 | -           |
| ORS_AM09_32_BH    | 3.680670242 | -           |
| ORS_AF03_155      | 3.7834138   | -           |
| ODP_AM09_16_O_BH  | 3.542543563 | -           |
| SEQF1888          | 3.417028681 | -           |
| SEQF2070          | 3.47690778  | -           |
| SEQF2000          | 3.032267995 | -           |
| SEQF3057          | 2.698096312 | -           |
| SEQF1704          | 3.373825859 | -           |
| ORS_AM09_5_104    | 3.706662436 | -           |
| SEQF3173          | 3.388956107 | -           |
| ODP_AM09_19_O_104 | 3.597295404 | -           |
| SEQF2786          | 3.214805386 | -           |
| SEQF1698          | 4.102435302 | -           |
| SEQF1889          | 3.477222128 | -           |
| SEQF2346          | 3.304801328 | -           |
| SEQF2344          | 3.829908768 | -           |

|                   |             |             |
|-------------------|-------------|-------------|
| SEQF2222          | 3.819470508 | -           |
| SEQF2004          | 3.632610513 | -           |
| SEQF2400          | 4.010641098 | -           |
| SEQF1367          | 4.176759878 | -           |
| SEQF2792          | 2.399573729 | -           |
| SEQF1677          | 3.119761897 | -           |
| SEQF1480          | 2.297009204 | -           |
| SEQF1646          | 1.907699341 | 0.013836135 |
| SEQF1899          | 3.250315494 | -           |
| SEQF1985          | 2.390302458 | -           |
| SEQF2582          | 2.675438387 | -           |
| SEQF1599          | 2.798765759 | 0.005573308 |
| SEQF2380          | 2.414328348 | -           |
| SEQF1671          | 3.3003355   | -           |
| SEQF3090          | 3.083519857 | -           |
| SEQF1597          | 3.549892348 | -           |
| SEQF2753          | 2.824511226 | -           |
| SEQF1031          | 2.873348437 | -           |
| SEQF1949          | 2.264572263 | -           |
| SEQF1933          | 2.835543673 | -           |
| SEQF2751          | 3.001409823 | -           |
| SEQF2191          | 1.378311951 | 0.001492613 |
| SEQF2780          | 3.249246292 | -           |
| SEQF2162          | 1.988326177 | 0.003228236 |
| SEQF2583          | 3.402493619 | -           |
| ODP_AM05_440      | 1.343324017 | 0.045553279 |
| SEQF3150          | 1.356835294 | -           |
| SEQF1678          | 3.3014369   | -           |
| SEQF1897          | 3.643096199 | -           |
| SEQF1724          | 4.111113628 | -           |
| ORT_AF06_92       | 4.450071637 | -           |
| SEQF1925          | 3.964709504 | -           |
| ODP_AM05_322      | 4.083268893 | -           |
| ODP_TM07_296      | 1.384851128 | -           |
| SEQF2594          | 2.940129318 | -           |
| SEQF1701          | 3.319305679 | -           |
| SEQF2705          | 3.06245299  | -           |
| SEQF3180          | 3.910534662 | -           |
| SEQF2806          | 3.814586879 | -           |
| SEQF1853          | 2.836236621 | -           |
| ORT_AM09_5D6      | 3.102772638 | -           |
| SEQF2451          | 2.19188297  | 0.047944453 |
| SEQF2574          | 2.369009618 | -           |
| ODP_AM01_05BB     | 2.909751559 | -           |
| SEQF1667          | 2.774728063 | -           |
| SEQF3096          | 3.581243003 | -           |
| SEQF1388          | 3.638063628 | -           |
| ODP_AM08_284      | 3.288437681 | -           |
| ORS_AM08_152      | 4.383957779 | -           |
| ORS_AM05_205      | 4.445326832 | -           |
| SEQF3177          | 2.160864395 | -           |
| SEQF3495          | 1.998287735 | 1.14E-05    |
| SEQF2824          | 2.284411361 | 5.25E-07    |
| SEQF1860          | 2.213921665 | 0.000138216 |
| SEQF2057          | 1.309447329 | 0.000582574 |
| SEQF2047          | 1.380331294 | 0.000176838 |
| SEQF1981          | 1.412571738 | 8.35E-05    |
| SEQF3087          | 1.30176416  | -           |
| SEQF2778          | 1.223684324 | -           |
| SEQF2629          | 1.715359237 | -           |
| SEQF2444          | 3.325381959 | -           |
| SEQF1594          | 2.333963569 | 0.000393722 |
| SEQF1969          | 2.421377401 | 2.12E-05    |
| SEQF1618          | 2.614784451 | 0.033819029 |
| SEQF3178          | 3.344289991 | -           |
| SEQF1652          | 2.177179939 | 3.42E-05    |
| SEQF2330          | 2.202187237 | 0.000544939 |
| ORT_AF03_215      | 3.177923964 | -           |
| ORT_AM08_195      | 3.285450695 | -           |
| ORT_AM05_95       | 2.7401073   | -           |
| ORT_AM05_520      | 3.641937953 | -           |
| ORT_AM01_02       | 2.071653181 | 0.0060879   |
| ORT_AF10_07_O_BH  | 3.512848746 | -           |
| ORT_AM05_101      | 3.767528257 | -           |
| ORT_AF03_76       | 3.658807681 | -           |
| ORT_AF08_17       | 3.37578486  | -           |
| ORS_AM05_357      | 3.630684605 | -           |
| ORS_TM07_255      | 3.240216184 | -           |
| ORS_AM05_481      | 3.369926482 | -           |
| ORS_AM08_178      | 3.599270633 | -           |
| ORS_TM06_91       | 3.258315283 | -           |
| ORS_AM09_2_O_104  | 3.376592417 | -           |
| ORS_AM09_14_O_104 | 3.229043335 | -           |
| ORS_AM09_1_2_O_BH | 3.159521379 | -           |
| ORS_TM06_113      | 3.209773933 | -           |
| ORS_AM09_45_O_BH  | 3.603285931 | -           |
| ORS_AM09_40_O_BH  | 3.29514134  | -           |
| ORS_AM09_3_104    | 3.731981026 | -           |
| ORS_AM08_63       | 3.471487656 | -           |
| ORS_AM09_26_BH    | 3.716128839 | -           |
| ORS_AM09_15_104   | 3.55116681  | -           |
| ODP_AM09_19_O_BH  | 0.371278566 | -           |
| ORT_AM01_01TBO    | 0.515281528 | -           |
| ODP_AF03_248      | 0.754367356 | -           |



|                                                                 |             |             |
|-----------------------------------------------------------------|-------------|-------------|
| SEQF1178                                                        | 1.038682396 | 0.021296631 |
| SEQF2416                                                        | 2.492656996 | 0.00476639  |
| SEQF2434                                                        | 2.242137275 | 0.037625424 |
| SEQF2476                                                        | 2.367788732 | 0.000729534 |
| SEQF1731                                                        | 2.401331406 | 0.001048517 |
| SEQF2794                                                        | 2.500298029 | 8.35E-05    |
| SEQF1177                                                        | 2.651013971 | -           |
| SEQF1687                                                        | 1.862680406 | -           |
| SEQF3059                                                        | 2.120391881 | -           |
| SEQF2319                                                        | 2.418387403 | 0.049597734 |
| SEQF3174                                                        | 2.472458152 | -           |
| SEQF1937                                                        | 2.452524978 | 0.048765584 |
| ORS_AM05_380                                                    | 3.116135011 | -           |
| ODP_AM05_463                                                    | 2.942746282 | -           |
| SEQF2579                                                        | 2.143276918 | -           |
| SEQF2580                                                        | 2.676018568 | -           |
| SEQF1617                                                        | 2.515810301 | -           |
| SEQF2147                                                        | 2.491169348 | -           |
| SEQF2788                                                        | 1.380207753 | -           |
| SEQF1988                                                        | 1.932219682 | -           |
| SEQF1915                                                        | 2.114141427 | -           |
| SEQF1946                                                        | 2.071177542 | -           |
| SEQF3105                                                        | 2.377996313 | 0.004454163 |
| SEQF1863                                                        | 2.093287679 | -           |
| SEQF1936                                                        | 2.45012987  | -           |
| SEQF3055                                                        | 2.1884431   | -           |
| SEQF1935                                                        | 2.815784521 | -           |
| SEQF1656                                                        | 3.020529422 | -           |
| SEQF1900                                                        | 2.58663013  | -           |
| SEQF1451                                                        | 2.676337477 | -           |
| SEQF1893                                                        | 3.229513079 | -           |
| SEQF3072                                                        | 2.499132353 | 0.00622306  |
| SEQF1986                                                        | 3.051705686 | -           |
| SEQF1602                                                        | 2.898296677 | -           |
| SEQF1653                                                        | 2.846471448 | -           |
| SEQF1452                                                        | 3.217615166 | -           |
| SEQF3074                                                        | 3.397258869 | -           |
| SEQF2687                                                        | 3.107447058 | -           |
| SEQF2922                                                        | 3.439796019 | -           |
| SEQF1691                                                        | 2.916984003 | -           |
| SEQF1142                                                        | 4.280363866 | -           |
| SEQF1033                                                        | 3.75416136  | -           |
| SEQF1907                                                        | 4.225308225 | -           |
| ODP_AM09_20_O_104                                               | 3.418612662 | -           |
| ODP_AM01_10                                                     | 2.440940341 | -           |
| ODP_AM08_398                                                    | 2.947330142 | -           |
| ODP_AM09_1_1_O_BH                                               | 3.027632524 | -           |
| ODP_AM09_12_104                                                 | 3.551743761 | -           |
| ODP_AM05_504                                                    | 3.486430515 | -           |
| ODP_AM09_14_BH                                                  | 3.16727484  | -           |
| ODP_AM08_466                                                    | 3.414998737 | -           |
| ORS_AF10_C15                                                    | 3.281387607 | -           |
| ORS_AF10_C20                                                    | 3.356980772 | -           |
| ORS_AF10_C12                                                    | 3.625262501 | -           |
| ORS_AF08_3_MRS                                                  | 3.591733241 | -           |
| ODP_TM06_153                                                    | 3.114815157 | -           |
| ODP_TM06_159                                                    | 2.995221713 | -           |
| ORS_AF04_142                                                    | 3.046991388 | -           |
| ORS_AF04_42                                                     | 3.402068204 | -           |
| ORS_AF08_16_MRS                                                 | 3.243273355 | -           |
| ORS_AF04_252                                                    | 3.129022759 | -           |
| ORS_AF04_143                                                    | 3.272622673 | -           |
| ORS_AF05_220                                                    | 3.410463619 | -           |
| GCA_019352195_1_ASM1935219v1_genomic                            | 0           | 0.002303901 |
| GCA_013816445_1_ASM1381644v1_genomic                            | 0           | -           |
| GCA_016191105_1_ASM1619110v1_genomic                            | 0           | -           |
| GCA_009691435_1_ASM969143v1_genomic                             | 0           | -           |
| GCA_014191035_1_ASM1419103v1_genomic                            | 0           | 0.013749699 |
| GCA_007131065_1_ASM713106v1_genomic                             | 0           | 0.002296161 |
| GCA_003022365_1_ASM302236v1_genomic                             | 0           | 0.012251178 |
| GCA_017983775_1_ASM1798377v1_genomic                            | 0.262211866 | 0.016876181 |
| GCA_001790455_1_ASM179045v1_genomic                             | 0           | -           |
| GCA_025449905_1_ASM2544990v1_genomic                            | 0           | -           |
| GCA_946479835_1_SRR15094062_bin_4_metawrap_v1_3_0_MAG_genomic   | 0           | -           |
| GCA_013694995_1_ASM1369499v1_genomic                            | 0           | -           |
| GCA_012965045_1_ASM1296504v1_genomic                            | 0           | 7.27E-05    |
| GCA_017991755_1_ASM1799175v1_genomic                            | 0           | -           |
| GCA_016196195_1_ASM1619619v1_genomic                            | 0           | -           |
| GCA_017992295_1_ASM1799229v1_genomic                            | 0           | -           |
| GCA_020428475_1_ASM2042847v1_genomic                            | 0           | -           |
| GCA_018001155_1_ASM1800115v1_genomic                            | 0           | 0.02160063  |
| GCA_903859365_1_freshwater_MAG__AM_lipid_02_D3_bin_0353_genomic | 0           | 0.002147511 |
| GCA_002482925_1_ASM248292v1_genomic                             | 0           | -           |
| GCA_004100265_1_ASM410026v1_genomic                             | 0           | -           |
| GCA_020428525_1_ASM2042852v1_genomic                            | 0           | -           |
| GCA_026707815_1_ASM2670781v1_genomic                            | 0.042343779 | 0.000462956 |
| GCA_007135955_1_ASM713595v1_genomic                             | 0           | -           |
| GCA_020428005_1_ASM2042800v1_genomic                            | 0           | -           |
| GCA_024635455_1_ASM2463545v1_genomic                            | 0           | 0.001727343 |
| GCA_026395435_1_ASM2639543v1_genomic                            | 0           | 0.00241969  |
| GCA_026395395_1_ASM2639539v1_genomic                            | 0           | -           |
| GCA_943354005_1_MsH_30jul19_11_genomic                          | 0           | -           |
| GCA_003962975_1_ASM396297v1_genomic                             | 0           | 0.010015174 |
| GCA_943354725_1_RH_27jun17_331_genomic                          | 0           | -           |

|                                                                 |            |             |
|-----------------------------------------------------------------|------------|-------------|
| GCA_903937695_1_freshwater_MAG_____Loc090907_1m_bin_354_genomic | 0          | -           |
| GCA_020428425_1_ASM2042842v1_genomic                            | 0          | -           |
| GCA_016789455_1_ASM1678945v1_genomic                            | 0          | -           |
| GCA_022842995_1_ASM2284299v1_genomic                            | 0          | 0.042087234 |
| GCA_001790445_1_ASM179044v1_genomic                             | 0          | -           |
| GCA_946478995_1_SRR15094062_bin_6_metawrap_v1_3_0_MAG_genomic   | 0          | -           |
| GCA_016219345_1_ASM1621934v1_genomic                            | 0          | -           |
| GCA_025451045_1_ASM2545104v1_genomic                            | 0          | -           |
| GCA_020428315_1_ASM2042831v1_genomic                            | 0          | 0.022352282 |
| GCA_000503915_1_ASM50391v1_genomic                              | 0          | 0.026857392 |
| GCA_018060465_1_ASM1806046v1_genomic                            | 0          | 0.048889587 |
| GCA_002455275_1_ASM245527v1_genomic                             | 0          | 0.048889587 |
| GCA_002343565_1_ASM234356v1_genomic                             | 0          | -           |
| GCA_023259925_1_ASM2325992v1_genomic                            | 0          | 0.011486548 |
| GCA_014377345_1_ASM1437734v1_genomic                            | 0          | -           |
| GCA_002335175_1_ASM233517v1_genomic                             | 0          | -           |
| GCA_002316545_1_ASM231654v1_genomic                             | 0          | -           |
| GCA_023257815_1_ASM2325781v1_genomic                            | 0          | -           |
| GCA_002348615_1_ASM234861v1_genomic                             | 0          | -           |
| GCA_016700315_1_ASM1670031v1_genomic                            | 0          | -           |
| GCA_003231925_1_ASM323192v1_genomic                             | 0          | 0.000649642 |
| GCA_026395375_1_ASM2639537v1_genomic                            | 0          | 0.000144141 |
| GCA_016183515_1_ASM1618351v1_genomic                            | 0          | 0.004446654 |
| GCA_001788555_1_ASM178855v1_genomic                             | 0          | 0.048889587 |
| GCA_946478715_1_SRR10754055_bin_5_metawrap_v1_3_0_MAG_genomic   | 0          | -           |
| GCA_025934715_1_ASM2593471v1_genomic                            | 0          | -           |
| GCA_013815775_1_ASM1381577v1_genomic                            | 0          | -           |
| GCA_016234585_1_ASM1623458v1_genomic                            | 0          | -           |
| GCA_016187175_1_ASM1618717v1_genomic                            | 0          | -           |
| GCA_016176605_1_ASM1617660v1_genomic                            | 0          | -           |
| GCA_001790525_1_ASM179052v1_genomic                             | 0          | 0.016136834 |
| GCA_019662065_1_ASM1966206v1_genomic                            | 0          | -           |
| GCA_022841445_1_ASM2284144v1_genomic                            | 0          | 0.000312553 |
| GCA_027492255_1_ASM2749225v1_genomic                            | 0          | 0.014783927 |
| GCA_027493025_1_ASM2749302v1_genomic                            | 0          | -           |
| GCA_004294965_1_ASM429496v1_genomic                             | 0          | -           |
| GCA_027492975_1_ASM2749297v1_genomic                            | 0          | -           |
| GCA_002434045_1_ASM243404v1_genomic                             | 0          | 0.012755875 |
| GCA_001029695_1_ASM102969v1_genomic                             | 0          | 0.017602724 |
| GCA_001790365_1_ASM179036v1_genomic                             | 0          | -           |
| GCA_027450165_1_ASM2745016v1_genomic                            | 0          | -           |
| GCA_002413425_1_ASM241342v1_genomic                             | 0          | -           |
| GCA_013334475_1_ASM1333447v1_genomic                            | 0          | 0.018272412 |
| GCA_001873625_1_ASM187362v1_genomic                             | 0          | -           |
| GCA_015655045_1_ASM1565504v1_genomic                            | 0          | 0.002782825 |
| GCA_026395405_1_ASM2639540v1_genomic                            | 0          | 0.027379778 |
| GCA_002427805_1_ASM242780v1_genomic                             | 0          | -           |
| GCA_022736555_1_ASM2273655v1_genomic                            | 0          | 0.032535372 |
| GCA_943354985_1_Jr_19feb18_57_genomic                           | 0          | -           |
| GCA_002839415_1_ASM283941v1_genomic                             | 0          | -           |
| GCA_002404195_1_ASM240419v1_genomic                             | 0          | 0.036792327 |
| GCA_946479115_1_ERR5385026_bin_7_metawrap_v1_3_0_MAG_genomic    | 0          | -           |
| GCA_016432585_1_ASM1643258v1_genomic                            | 0.16800006 | 0.00028565  |
| GCA_004100325_1_ASM410032v1_genomic                             | 0          | -           |
| GCA_002381485_1_ASM238148v1_genomic                             | 0          | -           |
| GCA_946480535_1_SRR14536364_bin_32_metawrap_v1_3_0_MAG_genomic  | 0          | -           |
| GCA_027311865_1_ASM2731186v1_genomic                            | 0          | 0.017659948 |
| GCA_002699225_1_ASM269922v1_genomic                             | 0          | 0.046813595 |
| GCA_025349965_1_ASM2534996v1_genomic                            | 0          | 0.01163906  |
| GCA_001897295_1_ASM189729v1_genomic                             | 0          | -           |
| GCA_009992235_1_ASM999223v1_genomic                             | 0          | -           |
| GCA_017307155_1_ASM1730715v1_genomic                            | 0          | 0.009217576 |
| GCA_002429245_1_ASM242924v1_genomic                             | 0          | -           |
| GCA_002331045_1_ASM233104v1_genomic                             | 0          | 0.034147737 |
| GCA_027312225_1_ASM2731222v1_genomic                            | 0          | -           |
| GCA_027426875_1_ASM2742687v1_genomic                            | 0          | -           |
| GCA_027345405_1_ASM2734540v1_genomic                            | 0          | -           |
| GCA_027426815_1_ASM2742681v1_genomic                            | 0          | -           |
| GCA_027328705_1_ASM2732870v1_genomic                            | 0          | -           |
| GCA_027365555_1_ASM2736555v1_genomic                            | 0          | -           |
| GCA_027334585_1_ASM2733458v1_genomic                            | 0          | -           |
| GCA_027426835_1_ASM2742683v1_genomic                            | 0          | -           |
| GCA_027365795_1_ASM2736579v1_genomic                            | 0          | 0.021216615 |
| GCA_027331915_1_ASM2733191v1_genomic                            | 0          | 0.004818252 |
| GCA_027427695_1_ASM2742769v1_genomic                            | 0          | 0.020463526 |
| GCA_027427875_1_ASM2742787v1_genomic                            | 0          | 0.009121452 |
| GCA_027459425_1_ASM2745942v1_genomic                            | 0          | -           |
| GCA_027356125_1_ASM2735612v1_genomic                            | 0          | -           |
| GCA_027427835_1_ASM2742783v1_genomic                            | 0          | -           |
| GCA_027340605_1_ASM2734060v1_genomic                            | 0          | -           |
| GCA_027427295_1_ASM2742729v1_genomic                            | 0          | -           |
| GCA_027426675_1_ASM2742667v1_genomic                            | 0          | -           |
| GCA_027449065_1_ASM2744906v1_genomic                            | 0          | -           |
| GCA_027331975_1_ASM2733197v1_genomic                            | 0          | -           |
| GCA_027340655_1_ASM2734065v1_genomic                            | 0          | -           |
| GCA_027427215_1_ASM2742721v1_genomic                            | 0          | 0.011386683 |
| GCA_903828465_1_freshwater_MAG_____Umea3_bin_2596_genomic       | 0          | 0.016680884 |
| GCA_027426955_1_ASM2742695v1_genomic                            | 0          | 0.011680601 |
| GCA_027427255_1_ASM2742725v1_genomic                            | 0          | -           |
| GCA_027426915_1_ASM2742691v1_genomic                            | 0          | -           |
| GCA_027338765_1_ASM2733876v1_genomic                            | 0          | -           |
| GCA_016178135_1_ASM1617813v1_genomic                            | 0          | -           |
| GCA_025924835_1_ASM2592483v1_genomic                            | 0          | 0.012795627 |
| GCA_013815785_1_ASM1381578v1_genomic                            | 0          | -           |

|                                                                |             |             |
|----------------------------------------------------------------|-------------|-------------|
| GCA_020428105_1_ASM2042810v1_genomic                           | 0           | -           |
| GCA_023253175_1_ASM2325317v1_genomic                           | 0.592981033 | -           |
| SZAXPI018095_16_RA_dental_metaspades_bin_15                    | 1.904464659 | -           |
| GCA_024635495_1_ASM2463549v1_genomic                           | 0           | 0.014783927 |
| GCA_025928155_1_ASM2592815v1_genomic                           | 0           | -           |
| GCA_002441585_1_ASM244158v1_genomic                            | 0           | 0.010540533 |
| GCA_946482575_1_SRR14536435_bin_26_metawrap_v1_3_0_MAG_genomic | 0           | -           |
| GCA_025450135_1_ASM2545013v1_genomic                           | 0           | -           |
| GCA_003164595_1_20120700_S1D_genomic                           | 0           | -           |
| GCA_018062785_1_ASM1806278v1_genomic                           | 0           | -           |
| GCA_002413865_1_ASM241386v1_genomic                            | 0           | 0.002170843 |
| GCA_014377525_1_ASM1437752v1_genomic                           | 0           | -           |
| GCA_014377695_1_ASM1437769v1_genomic                           | 0           | -           |
| GCA_013289705_1_ASM1328970v1_genomic                           | 0           | 0.032461126 |
| GCA_020427985_1_ASM2042798v1_genomic                           | 0           | 0.018113381 |
| GCA_002952755_1_ASM295275v1_genomic                            | 0.196708398 | 0.019147872 |
| GCA_946482285_1_SRR14536431_bin_16_metawrap_v1_3_0_MAG_genomic | 0           | -           |
| GCA_903877025_1_freshwater_MAG_AligenLipids_bin_2261_genomic   | 0           | -           |
| GCA_903839435_1_freshwater_MAG_Kiruna_bin_08663_genomic        | 0           | -           |
| GCA_903883035_1_freshwater_MAG_Umea_bin_05361_genomic          | 0           | -           |
| GCA_903925195_1_freshwater_MAG_YR_bin_4708_genomic             | 0           | 0.044641829 |
| GCA_903840315_1_freshwater_MAG_AM_lipid_02_D2_bin_0413_genomic | 0           | 0.000126187 |
| GCA_016700375_1_ASM1670037v1_genomic                           | 0           | -           |
| GCA_016699955_1_ASM1669995v1_genomic                           | 0           | -           |
| GCA_002746885_1_ASM274688v1_genomic                            | 0           | -           |
| GCA_016789655_1_ASM1678965v1_genomic                           | 0           | -           |
| GCA_016699935_1_ASM1669993v1_genomic                           | 0.005467714 | -           |
| GCA_027325955_1_ASM2732595v1_genomic                           | 0           | -           |
| GCA_027314885_1_ASM2731488v1_genomic                           | 0           | -           |
| GCA_003133385_1_20120500_P26_genomic                           | 0           | -           |
| GCA_027366415_1_ASM2736641v1_genomic                           | 0           | -           |
| GCA_027459325_1_ASM2745932v1_genomic                           | 0           | 0.048889587 |
| GCA_003153395_1_20120700_P3D_genomic                           | 0           | 0.032887526 |
| GCA_027446965_1_ASM2744696v1_genomic                           | 0           | -           |
| GCA_002413795_1_ASM241379v1_genomic                            | 0           | -           |
| GCA_002792275_1_ASM279227v1_genomic                            | 0           | -           |
| GCA_027356525_1_ASM2735652v1_genomic                           | 0.112018945 | 8.02E-05    |
| GCA_002413835_1_ASM241383v1_genomic                            | 0           | -           |
| GCA_003516025_1_ASM351602v1_genomic                            | 0           | 0.006211341 |
| GCA_002413755_1_ASM241375v1_genomic                            | 0           | -           |
| GCA_027450065_1_ASM2745006v1_genomic                           | 0.771269201 | 0.030902793 |
| GCA_027315225_1_ASM2731522v1_genomic                           | 1.666136195 | 1.30E-05    |
| GCA_009783235_1_ASM978323v1_genomic                            | 0           | -           |
| GCA_009776375_1_ASM977637v1_genomic                            | 0           | -           |
| GCA_009785095_1_ASM978509v1_genomic                            | 0           | 0.03034903  |
| GCA_009787245_1_ASM978724v1_genomic                            | 0           | -           |
| GCA_947253405_1_SRR17635715_bin_15_metaWRAP_v1_3_MAG_genomic   | 0           | 0.001903902 |
| GCA_016699895_1_ASM1669989v1_genomic                           | 0           | -           |
| GCA_027492735_1_ASM2749273v1_genomic                           | 0           | 0.023798565 |
| GCA_004136275_1_ASM413627v1_genomic                            | 0           | 0.018681816 |
| GCA_946997535_1_SRR16916865_bin_12_metaWRAP_v1_3_MAG_genomic   | 0           | 0.036752867 |
| GCA_934725355_1_ERR7738173_bin_40_genomic                      | 0           | 0.021835728 |
| GCA_002313515_1_ASM231351v1_genomic                            | 0           | 0.00029777  |
| GCA_947090635_1_SRR11749285_bin_3_metaWRAP_v1_3_MAG_genomic    | 0           | 0.011087707 |
| GCA_947253945_1_SRR17635701_bin_9_metaWRAP_v1_3_MAG_genomic    | 0           | -           |
| GCA_902461855_1_UHGG_TPA_MGYG_HGUT_00376_genomic               | 0           | -           |
| R0170300120_tooth_RA_megahit_bin_52                            | 1.417791921 | -           |
| R0170300183_tooth_RA_megahit_bin_33                            | 0.933003706 | -           |
| SZAXPI018435_88_RA_saliva_metaspades_bin_58                    | 1.811959697 | -           |
| R0170300290_tooth_RAH_megahit_bin_12                           | 0.741743195 | -           |
| SZAXPI018094_15_RA_dental_metaspades_bin_29                    | 0.982780661 | -           |
| RSZAXPI002614_22_RA_dental_metaspades_bin_18                   | 1.125920484 | -           |
| R0170300267_tooth_RAH_megahit_bin_18                           | 1.105806994 | -           |
| SZAXPI018354_19_RA_saliva_metaspades_bin_2                     | 1.521110304 | -           |
| R0170300145_tooth_RA_megahit_bin_69                            | 0.910189757 | -           |
| R0170300207_tooth_RA_megahit_bin_65                            | 0.830249063 | -           |
| R0170300185_tooth_RA_megahit_bin_44                            | 0.850791294 | -           |
| R0170300176_tooth_RA_megahit_bin_83                            | 0.870893118 | -           |
| R0170300228_tooth_RA_megahit_bin_36                            | 0.900605594 | -           |
| R0170300065_tooth_RA_megahit_bin_77                            | 0.922186517 | -           |
| SZAXPI018396_36_RA_saliva_metaspades_bin_56                    | 1.575659287 | -           |
| RSZYD18187275_A_saliva_metaspades_bin_59                       | 0.882142297 | -           |
| RSZAXPI002620_35_RA_dental_metaspades_bin_60                   | 0.974222948 | -           |
| RDPYD18189858_A_saliva_metaspades_bin_62                       | 0.918769028 | -           |
| R0170300219_tooth_RA_megahit_bin_90                            | 0.982316651 | -           |
| RSZAXPI002656_16_RA_dental_metaspades_bin_48                   | 1.057624295 | -           |
| R0170300311_tooth_RAH_megahit_bin_92                           | 0.822234414 | -           |
| R0170300178_tooth_RA_megahit_bin_23                            | 1.03434212  | -           |
| R0170300310_tooth_RAH_megahit_bin_34                           | 0.955887892 | -           |
| R0170300149_tooth_RA_megahit_bin_28                            | 1.051852589 | -           |
| R0170300355_saliva_RA_megahit_bin_8                            | 0.97745174  | -           |
| R0170300276_tooth_RAH_megahit_bin_88                           | 0.959072299 | -           |
| R0170300155_tooth_RA_megahit_bin_58                            | 0.980769525 | -           |
| R0170300200_tooth_RA_megahit_bin_29                            | 0.885937888 | -           |
| SZAXPI018282_108_RA_dental_metaspades_bin_70                   | 1.316834355 | -           |
| R0170300214_tooth_RA_megahit_bin_92                            | 1.044300597 | -           |
| R0170300252_tooth_RAH_megahit_bin_32                           | 0.97336424  | -           |
| RSZAXPI002604_26_RA_dental_metaspades_bin_6                    | 1.001277849 | -           |
| R0170300287_tooth_RAH_megahit_bin_151                          | 0.926199373 | -           |
| RSZYD18187666_A_saliva_metaspades_bin_39                       | 1.150559984 | -           |
| SZAXPI018284_111_RA_dental_metaspades_bin_3                    | 1.083534905 | -           |
| R0170300325_tooth_RA_megahit_bin_8                             | 1.10671848  | -           |
| RSZAXPI002629_81_RA_dental_metaspades_bin_82                   | 0.88646065  | -           |
| R0170300251_tooth_RAH_megahit_bin_36                           | 1.280090455 | -           |



|                                                              |             |             |
|--------------------------------------------------------------|-------------|-------------|
| R0170300092_tooth_RA_megahit_bin_31                          | 0.967897672 | -           |
| R0170300051_tooth_RA_megahit_bin_56                          | 0.99923953  | -           |
| SZAXPI018181_37_RA_dental_metaspades_bin_33                  | 1.290109434 | -           |
| RSZAXPI002456_79_RAH_dental_metaspades_bin_34                | 1.197538765 | -           |
| SZAXPI018279_94_RA_dental_metaspades_bin_16                  | 1.089098252 | -           |
| R0170300078_tooth_RA_megahit_bin_66                          | 1.281873109 | -           |
| RSZAXPI002455_75_RAH_dental_metaspades_bin_27                | 1.096053885 | -           |
| RSZYD18078570_A_saliva_metaspades_bin_17                     | 0.991822642 | -           |
| GCA_013333515_2_ASM1333351v2_genomic                         | 1.004800403 | -           |
| RSZAXPI002312_21_RAH_dental_metaspades_bin_14                | 1.334233243 | -           |
| SZAXPI018313_15_RA_dental_metaspades_bin_43                  | 1.160456547 | -           |
| R0170300272_tooth_RAH_megahit_bin_14                         | 0.88642276  | -           |
| RSZAXPI002330_47_RAH_dental_metaspades_bin_70                | 1.231037701 | -           |
| R0170300100_tooth_RA_megahit_bin_38                          | 1.018234098 | -           |
| SZAXPI018096_17_RA_dental_metaspades_bin_67                  | 1.028307428 | -           |
| SZAXPI018171_25_1_RA_dental_metaspades_bin_83                | 1.194959659 | -           |
| SZAXPI018178_34_RA_dental_metaspades_bin_52                  | 1.074862733 | -           |
| R0170300303_tooth_RAH_megahit_bin_143                        | 0.89510048  | -           |
| R0170300263_tooth_RAH_megahit_bin_26                         | 0.97705992  | -           |
| RSZYD18187330_A_saliva_metaspades_bin_47                     | 1.017708724 | -           |
| R0170300270_tooth_RAH_megahit_bin_32                         | 0.977885439 | -           |
| R0170300133_tooth_RA_megahit_bin_60                          | 1.091689972 | -           |
| R0170300083_tooth_RA_megahit_bin_110                         | 0.981316353 | -           |
| GCA_905373385_1_SRR9217464_mag_bin_2_genomic                 | 1.034202896 | -           |
| GCA_004138455_1_ASM413845v1_genomic                          | 0.925673052 | -           |
| R0170300321_tooth_RAH_megahit_bin_95                         | 1.118537591 | -           |
| RSZAXPI002310_19_RAH_dental_metaspades_bin_24                | 1.391342864 | -           |
| GCA_946890795_1_SRR12830924_bin_6_metaWRAP_v1_3_MAG_genomic  | 0           | -           |
| GCA_905372225_1_SRR9217401_mag_bin_8_genomic                 | 0.850916218 | -           |
| RSZAXPI002619_34_RA_dental_metaspades_bin_45                 | 1.008781344 | -           |
| R0170300182_tooth_RA_megahit_bin_100                         | 1.060000546 | -           |
| YS000254_saliva_spades_bin_23                                | 0.884603802 | -           |
| R0170300232_tooth_RA_megahit_bin_10                          | 1.081850443 | -           |
| RSZAXPI002639_98_RA_dental_metaspades_bin_8                  | 1.6752786   | -           |
| R0170300309_tooth_RAH_megahit_bin_15                         | 1.072574988 | -           |
| R0170300222_tooth_RA_megahit_bin_89                          | 1.16043427  | -           |
| GCA_915070725_1_SRR1045092_bin_5_metaWRAP_v1_1_MAG_genomic   | 1.13389116  | -           |
| R0170300106_tooth_RA_megahit_bin_39                          | 1.106030082 | -           |
| RSZAXPI002321_33_RAH_dental_metaspades_bin_29                | 1.267954313 | -           |
| GCA_905373275_1_SRR9217462_mag_bin_7_genomic                 | 0.804818779 | -           |
| GCA_004138445_1_ASM413844v1_genomic                          | 1.124243274 | -           |
| R0170300279_tooth_RAH_megahit_bin_30                         | 1.033751635 | -           |
| RSZAXPI002305_14_RAH_dental_metaspades_bin_64                | 0.997071194 | -           |
| GCA_905365345_1_ERZ1645002_mag_bin_1_genomic                 | 1.710997218 | 0.000109221 |
| GCA_015999875_1_ASM1599987v1_genomic                         | 0           | -           |
| GCA_001003725_1_ASM100372v1_genomic                          | 0           | -           |
| GCA_025273655_1_ASM2527365v1_genomic                         | 0           | -           |
| GCA_027492635_1_ASM2749263v1_genomic                         | 0           | -           |
| GCA_013333595_2_ASM1333359v2_genomic                         | 2.002413677 | -           |
| SZAXPI018357_22_RA_saliva_metaspades_bin_71                  | 2.086062406 | -           |
| GCA_015257555_2_ASM1525755v2_genomic                         | 2.552538788 | -           |
| GCA_021404905_1_ASM2140490v1_genomic                         | 0           | 5.48E-05    |
| GCA_020428435_1_ASM2042843v1_genomic                         | 0           | -           |
| R0170300279_tooth_RAH_megahit_bin_93                         | 1.137574213 | 0.000924495 |
| R0170300217_tooth_RA_megahit_bin_23                          | 1.071223144 | 0.002534501 |
| GCA_947097085_1_SRR8786267_bin_10_metaWRAP_v1_3_MAG_genomic  | 1.130296408 | 0.011802445 |
| R0170300162_tooth_RA_megahit_bin_4                           | 1.061320585 | 0.001176355 |
| SZAXPI018312_14_RA_dental_metaspades_bin_67                  | 2.33166632  | -           |
| GCA_003246575_1_ASM324657v1_genomic                          | 0           | 0.01986567  |
| GCA_017983575_1_ASM1798357v1_genomic                         | 0           | 0.038178777 |
| GCA_002336935_1_ASM233693v1_genomic                          | 0           | 0.014783927 |
| GCA_002441145_1_ASM244114v1_genomic                          | 0           | -           |
| GCA_027492535_1_ASM2749253v1_genomic                         | 0           | -           |
| GCA_002421785_1_ASM242178v1_genomic                          | 0           | -           |
| GCA_020428275_1_ASM2042827v1_genomic                         | 0           | 0.007470712 |
| GCA_027428095_1_ASM2742809v1_genomic                         | 0           | 0.023477505 |
| GCA_000392435_1_ASM39243v1_genomic                           | 0           | 0.01118647  |
| GCA_016700015_1_ASM1670001v1_genomic                         | 0           | 0.003080014 |
| GCA_002337095_1_ASM233709v1_genomic                          | 0           | 0.00569085  |
| GCA_945873065_1_SRR15732359_bin_18_metaWRAP_v1_3_MAG_genomic | 0.663074549 | -           |
| RDYPD18300059_A_saliva_metaspades_bin_13                     | 0.785944814 | -           |
| R0170300213_tooth_RA_megahit_bin_30                          | 1.305756521 | -           |
| GCA_010201925_1_ASM1020192v1_genomic                         | 1.739971893 | -           |
| GCA_905373835_1_SRR9217492_mag_bin_7_genomic                 | 0.748033044 | -           |
| R0170300179_tooth_RA_megahit_bin_15                          | 0.765154122 | -           |
| SZAXPI018488_20_RA_saliva_metaspades_bin_49                  | 2.081282366 | -           |
| SZAXPI018281_102_RA_dental_metaspades_bin_20                 | 1.317036694 | -           |
| R0170300147_tooth_RA_megahit_bin_4                           | 0.76754962  | -           |
| RSZAXPI002323_35_RAH_dental_metaspades_bin_28                | 1.635909669 | -           |
| R0170300051_tooth_RA_megahit_bin_53                          | 0.97960389  | -           |
| R0170300189_tooth_RA_megahit_bin_1                           | 0.881487102 | -           |
| RSZAXPI002650_142_RA_saliva_metaspades_bin_28                | 0.754778    | -           |
| R0170300203_tooth_RA_megahit_bin_94                          | 0.828985253 | -           |
| R0170300061_tooth_RA_megahit_bin_12                          | 0.822845525 | -           |
| SZAXPI018096_17_RA_dental_metaspades_bin_23                  | 0.800518286 | -           |
| R0170300124_tooth_RA_megahit_bin_51                          | 1.065789966 | -           |
| R0170300282_tooth_RAH_megahit_bin_3                          | 1.240549797 | -           |
| GCA_927910745_1_ERR3827327_bin_3_metaWRAP_v1_1_MAG_genomic   | 1.201263039 | -           |
| GCA_013333645_2_ASM1333364v2_genomic                         | 0.668431458 | -           |
| R0170300258_tooth_RAH_megahit_bin_41                         | 0.927488505 | -           |
| GCA_946222005_1_ZZEVbxAAO0_bin_25_MAG_genomic                | 0.8461031   | -           |
| SZAXPI018184_41_RA_dental_metaspades_bin_37                  | 1.531565034 | -           |
| SZAXPI018318_20_RA_dental_metaspades_bin_6                   | 1.329970414 | -           |
| RSZAXPI002675_22_RA_dental_metaspades_bin_61                 | 0.844035381 | -           |

|                                                              |             |             |
|--------------------------------------------------------------|-------------|-------------|
| R0170300120_tooth_RA_megahit_bin_28                          | 0.817018968 | -           |
| GCA_905365145_1_ERZ1644999_mag_bin_1_genomic                 | 1.773944406 | -           |
| GCA_905372095_1_SRR9217394_mag_bin_2_genomic                 | 1.703932066 | -           |
| RSZAXPI002657_17_RA_dental_metaspades_bin_42                 | 1.821559432 | -           |
| SZAXPI018288_133_RA_dental_metaspades_bin_4                  | 1.3351712   | -           |
| SZAXPI018189_47_RA_dental_metaspades_bin_40                  | 1.779755541 | -           |
| R0170300170_tooth_RA_megahit_bin_155                         | 1.481326913 | -           |
| SZAXPI018280_95_RA_dental_metaspades_bin_36                  | 1.755871915 | -           |
| R0170300062_tooth_RA_megahit_bin_61                          | 1.556892717 | -           |
| R0170300222_tooth_RA_megahit_bin_94                          | 1.298298434 | -           |
| GCA_013333625_2_ASM1333362v2_genomic                         | 1.69705847  | -           |
| RSZAXPI002326_41_RAH_dental_metaspades_bin_24                | 1.942818165 | -           |
| SZAXPI018092_13_RA_dental_metaspades_bin_42                  | 1.926731916 | -           |
| RSZAXPI002316_25_RAH_dental_metaspades_bin_26                | 1.72633279  | -           |
| RSZAXPI002617_32_RA_dental_metaspades_bin_17                 | 1.759170983 | -           |
| GCA_905371595_1_SRR9217384_mag_bin_1_genomic                 | 1.735200596 | -           |
| R0170300295_tooth_RAH_megahit_bin_55                         | 0.964256532 | -           |
| R0170300252_tooth_RAH_megahit_bin_91                         | 0.902674442 | -           |
| SZAXPI018284_111_RA_dental_metaspades_bin_60                 | 1.905430329 | -           |
| R0170300319_tooth_RAH_megahit_bin_124                        | 0.96868785  | -           |
| SZAXPI018176_32_RA_dental_metaspades_bin_12                  | 1.967406201 | -           |
| R0170300106_tooth_RA_megahit_bin_47                          | 1.801170646 | -           |
| SZAXPI018316_18_RA_dental_metaspades_bin_5                   | 1.662881278 | -           |
| RSZAXPI002633_90_RA_dental_metaspades_bin_49                 | 1.910418086 | -           |
| R0170300267_tooth_RAH_megahit_bin_37                         | 1.762203238 | -           |
| R0170300320_tooth_RAH_megahit_bin_52                         | 1.862197416 | -           |
| GCA_015257665_1_ASM1525766v1_genomic                         | 1.464745385 | -           |
| GCA_905372385_1_SRR9217408_mag_bin_1_genomic                 | 1.996387737 | -           |
| R0170300057_tooth_RA_megahit_bin_6                           | 1.423018639 | -           |
| SZAXPI018280_95_RA_dental_metaspades_bin_20                  | 1.114823017 | -           |
| GCA_905371785_1_SRR9217391_mag_bin_4_genomic                 | 2.133207916 | -           |
| R0170300307_tooth_RAH_megahit_bin_81                         | 1.93608713  | -           |
| R0170300265_tooth_RAH_megahit_bin_100                        | 2.026656584 | -           |
| RDPYD18300192_A_saliva_metaspades_bin_52                     | 1.343073131 | -           |
| GCA_018127705_1_ASM1812770v1_genomic                         | 2.420231956 | -           |
| GCA_009778675_1_ASM977867v1_genomic                          | 0           | 0.019924084 |
| GCA_009777315_1_ASM977731v1_genomic                          | 0           | -           |
| SZAXPI018406_56_RA_saliva_metaspades_bin_71                  | 1.402398617 | -           |
| GCA_009781895_1_ASM978189v1_genomic                          | 0           | 0.028569252 |
| GCA_946404545_1_SRR12081298_bin_7_metaWRAP_v1_3_MAG_genomic  | 0           | -           |
| GCA_017437945_1_ASM1743794v1_genomic                         | 0           | -           |
| GCA_947304395_1_SRR10912535_bin_78_metaWRAP_v1_3_MAG_genomic | 0           | -           |
| GCA_946530965_1_SRR873598_bin_145_metaWRAP_v1_3_MAG_genomic  | 0           | -           |
| GCA_017460065_1_ASM1746006v1_genomic                         | 0           | 0.033122587 |
| GCA_017510385_1_ASM1751038v1_genomic                         | 0           | -           |
| GCA_017531585_1_ASM1753158v1_genomic                         | 0           | -           |
| GCA_946407955_1_SRR12081294_bin_80_metaWRAP_v1_3_MAG_genomic | 0           | -           |
| GCA_946406645_1_SRR12081302_bin_54_metaWRAP_v1_3_MAG_genomic | 0           | -           |
| GCA_017430725_1_ASM1743072v1_genomic                         | 0           | -           |
| GCA_946408075_1_SRR12081296_bin_6_metaWRAP_v1_3_MAG_genomic  | 0           | 0.032535372 |
| GCA_017457925_1_ASM1745792v1_genomic                         | 0           | 0.024686937 |
| GCA_947303945_1_SRR10912540_bin_27_metaWRAP_v1_3_MAG_genomic | 0           | 0.033582116 |
| GCA_009783305_1_ASM978330v1_genomic                          | 0           | -           |
| GCA_946619905_1_SRR873600_bin_141_metaWRAP_v1_3_MAG_genomic  | 0           | -           |
| GCA_024682595_1_ASM2468259v1_genomic                         | 0           | -           |
| GCA_017524405_1_ASM1752440v1_genomic                         | 0           | -           |
| GCA_017541245_1_ASM1754124v1_genomic                         | 0           | -           |
| GCA_017418275_1_ASM1741827v1_genomic                         | 0           | 0.001478174 |
| GCA_946624835_1_SRR873600_bin_13_metaWRAP_v1_3_MAG_genomic   | 0           | -           |
| GCA_016283505_1_ASM1628350v1_genomic                         | 0           | 0.041024388 |
| GCA_946406315_1_SRR12081301_bin_45_metaWRAP_v1_3_MAG_genomic | 0.694969658 | -           |
| GCA_947304825_1_SRR10912542_bin_28_metaWRAP_v1_3_MAG_genomic | 0           | -           |
| GCA_946404095_1_SRR12081303_bin_66_metaWRAP_v1_3_MAG_genomic | 0           | -           |
| GCA_017512225_1_ASM1751222v1_genomic                         | 0           | -           |
| GCA_017514025_1_ASM1751402v1_genomic                         | 0           | -           |
| GCA_017619315_1_ASM1761931v1_genomic                         | 0           | 0.048889587 |
| GCA_017431085_1_ASM1743108v1_genomic                         | 0           | -           |
| GCA_017510025_1_ASM1751002v1_genomic                         | 0           | -           |
| GCA_017536895_1_ASM1753689v1_genomic                         | 0           | -           |
| GCA_004138395_1_ASM413839v1_genomic                          | 0           | -           |
| GCA_947306055_1_SRR10912535_bin_62_metaWRAP_v1_3_MAG_genomic | 0           | -           |
| GCA_017431465_1_ASM1743146v1_genomic                         | 0           | -           |
| GCA_946414345_1_SRR12081302_bin_4_metaWRAP_v1_3_MAG_genomic  | 0           | 0.025597941 |
| GCA_017431745_1_ASM1743174v1_genomic                         | 0           | -           |
| GCA_017512095_1_ASM1751209v1_genomic                         | 0           | -           |
| GCA_017406565_1_ASM1740656v1_genomic                         | 0           | 0.007411664 |
| GCA_947425995_1_SRR19981123_bin_1_metawrap_v1_3_MAG_genomic  | 0           | -           |
| GCA_017433855_1_ASM1743385v1_genomic                         | 0           | -           |
| GCA_947388495_1_SRR15214593_bin_20_metawrap_v1_3_MAG_genomic | 0           | -           |
| GCA_017652105_1_ASM1765210v1_genomic                         | 0           | -           |
| GCA_017404325_1_ASM1740432v1_genomic                         | 0           | -           |
| GCA_017511645_1_ASM1751164v1_genomic                         | 0           | -           |
| GCA_017404485_1_ASM1740448v1_genomic                         | 0           | -           |
| GCA_947171955_1_SRR14862904_bin_27_metawrap_v1_3_MAG_genomic | 0           | -           |
| GCA_016280905_1_ASM1628090v1_genomic                         | 0           | -           |
| GCA_017533605_1_ASM1753360v1_genomic                         | 0           | -           |
| GCA_017552385_1_ASM1755238v1_genomic                         | 0           | -           |
| GCA_017406405_1_ASM1740640v1_genomic                         | 0           | -           |
| GCA_017421325_1_ASM1742132v1_genomic                         | 0           | -           |
| GCA_017432225_1_ASM1743222v1_genomic                         | 0           | 0.008299391 |
| GCA_947165465_1_SRR8387716_bin_80_metaWRAP_v1_3_MAG_genomic  | 0           | -           |
| GCA_017403895_1_ASM1740389v1_genomic                         | 0           | 0.022792347 |
| GCA_017515265_1_ASM1751526v1_genomic                         | 0           | -           |
| GCA_002363125_1_ASM236312v1_genomic                          | 0           | -           |

|                                                               |             |             |
|---------------------------------------------------------------|-------------|-------------|
| GCA_017447485_1_ASM1744748v1_genomic                          | 0           | -           |
| GCA_947087275_1_SRR14038240_bin_4_metawrap_v1_3_MAG_genomic   | 0           | -           |
| GCA_017482785_1_ASM1748278v1_genomic                          | 0           | 0.003385729 |
| GCA_017433185_1_ASM1743318v1_genomic                          | 0           | -           |
| GCA_017511925_1_ASM1751192v1_genomic                          | 0           | -           |
| GCA_017404685_1_ASM1740468v1_genomic                          | 0           | 0.000453605 |
| GCA_017515285_1_ASM1751528v1_genomic                          | 0           | 0.011419397 |
| GCA_017432365_1_ASM1743236v1_genomic                          | 0           | -           |
| GCA_017459765_1_ASM1745976v1_genomic                          | 0           | -           |
| GCA_017459845_1_ASM1745984v1_genomic                          | 0           | 0.039374725 |
| GCA_017432025_1_ASM1743202v1_genomic                          | 0           | 0.020481786 |
| GCA_947307355_1_SRR10912536_bin_13_metaWRAP_v1_3_MAG_genomic  | 0           | 0.015278169 |
| GCA_017545595_1_ASM1754559v1_genomic                          | 0           | 0.007027888 |
| GCA_017510705_1_ASM1751070v1_genomic                          | 0           | -           |
| GCA_017557865_1_ASM1755786v1_genomic                          | 0           | 0.003770455 |
| GCA_017404935_1_ASM1740493v1_genomic                          | 0           | 0.022942606 |
| GCA_017460105_1_ASM1746010v1_genomic                          | 0           | -           |
| GCA_947648615_1_SRR15633991_bin_36_metawrap_v1_3_MAG_genomic  | 0           | -           |
| GCA_017545525_1_ASM1754552v1_genomic                          | 0           | 0.048277974 |
| GCA_946409605_1_SRR12081300_bin_39_metaWRAP_v1_3_MAG_genomic  | 0           | -           |
| GCA_947166125_1_SRR8387714_bin_9_metaWRAP_v1_3_MAG_genomic    | 0           | -           |
| GCA_017510205_1_ASM1751020v1_genomic                          | 0           | -           |
| GCA_947302355_1_SRR10912539_bin_48_metaWRAP_v1_3_MAG_genomic  | 0           | 0.00258276  |
| GCA_017651125_1_ASM1765112v1_genomic                          | 0           | 0.001328674 |
| GCA_017421685_1_ASM1742168v1_genomic                          | 0           | -           |
| GCA_946405975_1_SRR12081303_bin_106_metaWRAP_v1_3_MAG_genomic | 0           | -           |
| GCA_002371235_1_ASM237123v1_genomic                           | 0           | 0.002660149 |
| GCA_017432425_1_ASM1743242v1_genomic                          | 0           | -           |
| GCA_017537745_1_ASM1753774v1_genomic                          | 0           | -           |
| GCA_017514145_1_ASM1751414v1_genomic                          | 0           | -           |
| GCA_017432705_1_ASM1743270v1_genomic                          | 0           | -           |
| GCA_017404515_1_ASM1740451v1_genomic                          | 0           | -           |
| GCA_017516075_1_ASM1751607v1_genomic                          | 0           | 0.001502278 |
| GCA_017514665_1_ASM1751466v1_genomic                          | 0           | 0.001408197 |
| GCA_017962365_1_ASM1796236v1_genomic                          | 0           | 0.003029137 |
| GCA_016286785_1_ASM1628678v1_genomic                          | 0           | 0.019307168 |
| GCA_017512045_1_ASM1751204v1_genomic                          | 0           | 0.015419185 |
| GCA_947368805_1_SRR15431190_bin_13_metawrap_v1_3_MAG_genomic  | 0           | -           |
| GCA_017506895_1_ASM1750689v1_genomic                          | 0           | 0.034751922 |
| GCA_946408595_1_SRR12081297_bin_13_metaWRAP_v1_3_MAG_genomic  | 0           | -           |
| GCA_017556795_1_ASM1755679v1_genomic                          | 0           | 0.00450766  |
| GCA_017407085_1_ASM1740708v1_genomic                          | 0           | 0.014706636 |
| GCA_947425855_1_SRR19981115_bin_7_metawrap_v1_3_MAG_genomic   | 0           | -           |
| GCA_017460165_1_ASM1746016v1_genomic                          | 0           | 0.007987915 |
| GCA_017509895_1_ASM1750989v1_genomic                          | 0           | 0.0301128   |
| GCA_017406775_1_ASM1740677v1_genomic                          | 0           | -           |
| GCA_017561575_1_ASM1756157v1_genomic                          | 0           | -           |
| GCA_024697865_1_ASM2469786v1_genomic                          | 0           | -           |
| GCA_947385605_1_ERR6760111_bin_57_metawrap_v1_3_MAG_genomic   | 0.109808978 | -           |
| GCA_017405225_1_ASM1740522v1_genomic                          | 0           | -           |
| GCA_017460305_1_ASM1746030v1_genomic                          | 0           | 0.002048972 |
| GCA_947364965_1_SRR16350202_bin_8_metawrap_v1_3_MAG_genomic   | 0           | -           |
| GCA_017514045_1_ASM1751404v1_genomic                          | 0           | 0.000131458 |
| GCA_017433845_1_ASM1743384v1_genomic                          | 0           | -           |
| GCA_017432505_1_ASM1743250v1_genomic                          | 0           | 0.032265183 |
| GCA_947089645_1_SRR14038237_bin_40_metawrap_v1_3_MAG_genomic  | 0           | -           |
| GCA_017432305_1_ASM1743230v1_genomic                          | 0           | 0.001402476 |
| GCA_017545505_1_ASM1754550v1_genomic                          | 0           | 0.001911175 |
| GCA_947346675_1_SRR14629574_bin_28_metawrap_v1_3_MAG_genomic  | 0           | -           |
| GCA_947296925_1_SRR19390379_bin_6_metawrap_v1_3_MAG_genomic   | 0           | -           |
| GCA_017652765_1_ASM1765276v1_genomic                          | 0           | 0.000572927 |
| GCA_017460625_1_ASM1746062v1_genomic                          | 0           | 0.012597817 |
| GCA_947165975_1_SRR8387714_bin_97_metaWRAP_v1_3_MAG_genomic   | 0           | -           |
| GCA_017510665_1_ASM1751066v1_genomic                          | 0           | -           |
| GCA_946548715_1_SRR1222429_bin_13_metaWRAP_v1_3_MAG_genomic   | 0           | 0.006198544 |
| GCA_017514675_1_ASM1751467v1_genomic                          | 0           | -           |
| GCA_017431945_1_ASM1743194v1_genomic                          | 0           | 0.008216922 |
| GCA_017431955_1_ASM1743195v1_genomic                          | 0           | -           |
| GCA_017515785_1_ASM1751578v1_genomic                          | 0           | 0.04258768  |
| GCA_947304155_1_SRR10912535_bin_54_metaWRAP_v1_3_MAG_genomic  | 0           | -           |
| GCA_946414465_1_SRR12081303_bin_63_metaWRAP_v1_3_MAG_genomic  | 0           | -           |
| GCA_947304135_1_SRR10912535_bin_47_metaWRAP_v1_3_MAG_genomic  | 0           | -           |
| GCA_017510425_1_ASM1751042v1_genomic                          | 0           | 0.019378985 |
| GCA_017510445_1_ASM1751044v1_genomic                          | 0           | 0.035440623 |
| GCA_017511845_1_ASM1751184v1_genomic                          | 0           | 0.010365082 |
| GCA_017510075_1_ASM1751007v1_genomic                          | 0           | -           |
| GCA_017406985_1_ASM1740698v1_genomic                          | 0           | -           |
| GCA_003979185_1_ASM397918v1_genomic                           | 0           | -           |
| GCA_947302975_1_SRR10912535_bin_55_metaWRAP_v1_3_MAG_genomic  | 0           | -           |
| GCA_947428935_1_SRR19981124_bin_14_metawrap_v1_3_MAG_genomic  | 0           | -           |
| GCA_017459705_1_ASM1745970v1_genomic                          | 0           | -           |
| GCA_017480095_1_ASM1748009v1_genomic                          | 0           | 0.006484758 |
| GCA_017511205_1_ASM1751120v1_genomic                          | 0           | -           |
| GCA_017404845_1_ASM1740484v1_genomic                          | 0           | -           |
| GCA_017480035_1_ASM1748003v1_genomic                          | 0           | 0.006280115 |
| GCA_947425245_1_SRR19981124_bin_25_metawrap_v1_3_MAG_genomic  | 0           | -           |
| GCA_017515105_1_ASM1751510v1_genomic                          | 0           | -           |
| GCA_017510925_1_ASM1751092v1_genomic                          | 0           | 0.022470504 |
| GCA_945872155_1_SRR15732359_bin_8_metaWRAP_v1_3_MAG_genomic   | 0.233229451 | -           |
| GCA_024699125_1_ASM2469912v1_genomic                          | 0           | -           |
| GCA_947168545_1_SRR8387715_bin_82_metaWRAP_v1_3_MAG_genomic   | 0           | 0.000831194 |
| GCA_017511965_1_ASM1751196v1_genomic                          | 0           | -           |
| GCA_017404955_1_ASM1740495v1_genomic                          | 0           | -           |
| GCA_017406905_1_ASM1740690v1_genomic                          | 0           | 0.002542543 |



|                                                              |             |             |
|--------------------------------------------------------------|-------------|-------------|
| GCA_017514865_1_ASM1751486v1_genomic                         | 0           | 0.011740138 |
| GCA_002309075_1_ASM230907v1_genomic                          | 0           | -           |
| GCA_017460225_1_ASM1746022v1_genomic                         | 0           | 0.039373617 |
| GCA_017404335_1_ASM1740433v1_genomic                         | 0           | -           |
| GCA_017430785_1_ASM1743078v1_genomic                         | 0           | -           |
| GCA_947306835_1_SRR10912542_bin_23_metaWRAP_v1_3_MAG_genomic | 0           | -           |
| GCA_947569885_1_SRR15604579_bin_36_metawrap_v1_3_MAG_genomic | 0.072323601 | -           |
| GCA_017513905_1_ASM1751390v1_genomic                         | 0           | 0.0068028   |
| GCA_017512925_1_ASM1751292v1_genomic                         | 0           | -           |
| GCA_947427335_1_SRR18439536_bin_19_metawrap_v1_3_MAG_genomic | 0.027992419 | 0.000524982 |
| GCA_947303265_1_SRR10912539_bin_36_metaWRAP_v1_3_MAG_genomic | 0           | -           |
| GCA_017404725_1_ASM1740472v1_genomic                         | 0           | 2.14E-05    |
| GCA_017404795_1_ASM1740479v1_genomic                         | 0.154842955 | -           |
| SZAXPI018406_56_RA_saliva_metaspades_bin_70                  | 1.827274628 | -           |
| RSZAXPI002619_34_RA_dental_metaspades_bin_5                  | 0.981896987 | -           |
| R0170300292_tooth_RAH_megahit_bin_19                         | 1.43108922  | -           |
| GCA_017557805_1_ASM1755780v1_genomic                         | 0           | 0.019825481 |
| GCA_017512085_1_ASM1751208v1_genomic                         | 0           | -           |
| RSZAXPI002313_22_RA_dental_metaspades_bin_87                 | 1.654246472 | -           |
| GCA_947068245_1_SRR12358625_bin_21_metawrap_v1_3_MAG_genomic | 0.802673846 | -           |
| RDPYD18098896_A_saliva_metaspades_bin_29                     | 1.868641068 | -           |
| RDPYD18088951_A_saliva_metaspades_bin_87                     | 1.848896177 | -           |
| R0170300146_tooth_RA_megahit_bin_30                          | 0.813427148 | -           |
| R0170300161_tooth_RA_megahit_bin_150                         | 1.566535887 | -           |
| R0170300287_tooth_RAH_megahit_bin_150                        | 1.075748278 | -           |
| RSZYD18187537_A_saliva_metaspades_bin_50                     | 1.86214709  | 0.039724705 |
| R0170300233_tooth_RA_megahit_bin_80                          | 1.708031131 | -           |
| RDPYD18300081_A_saliva_metaspades_bin_28                     | 1.930525555 | -           |
| R0170300392_saliva_RAH_megahit_bin_14                        | 1.488372638 | 0.048762617 |
| RSZYD18078542_A_saliva_metaspades_bin_52                     | 1.126398473 | -           |
| RSZYD18078322_A_saliva_metaspades_bin_73                     | 1.805563659 | -           |
| RDPYD18201655_A_saliva_metaspades_bin_21                     | 1.257393138 | -           |
| RSZYD18187002_A_saliva_metaspades_bin_39                     | 1.310572546 | -           |
| R0170300162_tooth_RA_megahit_bin_89                          | 1.793952514 | -           |
| RDPYD18189959_A_saliva_metaspades_bin_31                     | 1.286223837 | -           |
| RDPYD18300101_A_saliva_metaspades_bin_92                     | 1.396996376 | -           |
| GCA_013333375_2_ASM1333337v2_genomic                         | 1.288960112 | -           |
| RSZYD18078115_A_saliva_metaspades_bin_19                     | 1.49011189  | -           |
| R0170300223_tooth_RA_megahit_bin_10                          | 1.826604846 | 0.045553279 |
| SZAXPI018394_33_RA_saliva_metaspades_bin_17                  | 1.904314264 | -           |
| RSZYD18078398_A_saliva_metaspades_bin_15                     | 1.354870466 | 0.021272768 |
| RSZYD18078217_A_saliva_metaspades_bin_95                     | 1.439844456 | -           |
| RSZYD18187344_A_saliva_metaspades_bin_71                     | 1.360818086 | -           |
| RDPYD18189835_A_saliva_metaspades_bin_31                     | 1.367361473 | -           |
| RDPYD18300377_A_saliva_metaspades_bin_20                     | 1.403260539 | -           |
| RDPYD18098585_A_saliva_metaspades_bin_25                     | 1.443199316 | -           |
| RSZYD18187690_A_saliva_metaspades_bin_43                     | 1.34975207  | -           |
| RSZYD18078100_A_saliva_metaspades_bin_89                     | 1.81369586  | 0.047919508 |
| GCA_013333135_2_ASM1333313v2_genomic                         | 1.304309391 | -           |
| RSZYD18078115_A_saliva_metaspades_bin_40                     | 1.804559629 | -           |
| RSZYD18187336_A_saliva_metaspades_bin_56                     | 1.391865984 | -           |
| RSZYD18078615_A_saliva_metaspades_bin_32                     | 1.595494085 | -           |
| R0170300378_saliva_RAH_megahit_bin_36                        | 2.145046247 | 0.045155777 |
| RSZYD18078325_A_saliva_metaspades_bin_95                     | 1.92063807  | -           |
| RDPYD18189966_A_saliva_metaspades_bin_40                     | 1.399210895 | -           |
| RSZYD18187652_A_saliva_metaspades_bin_2                      | 1.566253134 | -           |
| RDPYD18300015_A_saliva_metaspades_bin_29                     | 1.560625786 | -           |
| RSZYD18078695_A_saliva_metaspades_bin_25                     | 1.429829589 | -           |
| RSZYD18078343_A_saliva_metaspades_bin_34                     | 1.443254719 | -           |
| SZAXPI018439_102_RA_saliva_metaspades_bin_34                 | 2.123146588 | -           |
| RDPYD18300091_A_saliva_metaspades_bin_68                     | 1.587586621 | -           |
| RDPYD18088981_A_saliva_metaspades_bin_1                      | 1.420237953 | -           |
| RDPYD18088979_A_saliva_metaspades_bin_8                      | 1.473596809 | -           |
| RSZYD18187350_A_saliva_metaspades_bin_64                     | 1.355096438 | -           |
| GCA_015257445_1_ASM1525744v1_genomic                         | 1.412721515 | -           |
| SZAXPI018312_14_RA_dental_metaspades_bin_62                  | 1.582576541 | -           |
| RSZYD18078148_A_saliva_metaspades_bin_14                     | 1.572697543 | -           |
| RDPYD18300175_A_saliva_metaspades_bin_54                     | 1.862877942 | -           |
| RSZYD18187273_A_saliva_metaspades_bin_99                     | 1.3226891   | -           |
| RSZYD18187327_A_saliva_metaspades_bin_15                     | 1.556111308 | -           |
| R0170300264_tooth_RAH_megahit_bin_17                         | 1.504720867 | -           |
| RSZYD18187174_A_saliva_metaspades_bin_29                     | 1.533243857 | -           |
| RSZYD18187503_A_saliva_metaspades_bin_19                     | 1.544392689 | -           |
| GCA_015257485_1_ASM1525748v1_genomic                         | 1.69106656  | -           |
| RSZYD18187144_A_saliva_metaspades_bin_68                     | 1.395425157 | -           |
| GCA_013332955_2_ASM1333295v2_genomic                         | 1.533626642 | -           |
| RSZAXPI002326_41_RA_dental_metaspades_bin_8                  | 1.666368394 | -           |
| SZAXPI018397_37_RA_saliva_metaspades_bin_18                  | 1.999591657 | -           |
| R0170300298_tooth_RAH_megahit_bin_124                        | 1.72118143  | -           |
| RSZYD18078798_A_saliva_metaspades_bin_24                     | 1.875781155 | -           |
| RSZYD18187234_A_saliva_metaspades_bin_82                     | 1.49805966  | 0.015591582 |
| RSZYD18187330_A_saliva_metaspades_bin_30                     | 1.626943002 | -           |
| RSZYD18078259_A_saliva_metaspades_bin_22                     | 1.739582706 | -           |
| RDPYD18300036_A_saliva_metaspades_bin_53                     | 1.776623547 | -           |
| RSZYD18187184_A_saliva_metaspades_bin_14                     | 1.630312302 | -           |
| RSZAXPI002479_169_2_RA_saliva_metaspades_bin_78              | 2.360332618 | -           |
| SZAXPI018358_23_RA_saliva_metaspades_bin_53                  | 2.041202296 | -           |
| RSZYD18078181_A_saliva_metaspades_bin_24                     | 1.660342385 | -           |
| RSZYD18187492_A_saliva_metaspades_bin_15                     | 1.783562332 | -           |
| RSZAXPI002622_39_RA_saliva_metaspades_bin_19                 | 1.683239988 | -           |
| RDPYD18123880_A_tongue_metaspades_bin_23                     | 1.771624969 | -           |
| SZAXPI018493_25_RA_saliva_metaspades_bin_44                  | 2.076026266 | -           |
| SZAXPI018492_24_RA_saliva_metaspades_bin_47                  | 2.069687935 | -           |
| RSZYD18187261_A_saliva_metaspades_bin_68                     | 2.14246281  | 8.17E-08    |

|                                                            |             |             |
|------------------------------------------------------------|-------------|-------------|
| RSZYD18078769_A_saliva_metaspades_bin_60                   | 1.980172491 | -           |
| GCA_018058565_1_ASM1805856v1_genomic                       | 0           | 0.001509487 |
| GCA_010014525_1_ASM1001452v1_genomic                       | 0.081552375 | 0.032088697 |
| RDPYD18098326_A_saliva_metaspades_bin_7                    | 1.791316788 | -           |
| R0170300119_tooth_RA_megahit_bin_12                        | 1.182984412 | -           |
| SZAXPI018317_19_RA_dental_metaspades_bin_69                | 1.483897365 | -           |
| R0170300141_tooth_RA_megahit_bin_72                        | 1.436323578 | -           |
| RSZYD18187349_A_saliva_metaspades_bin_40                   | 1.563870914 | -           |
| RSZYD18187447_A_saliva_metaspades_bin_38                   | 1.54403993  | -           |
| R0170300232_tooth_RA_megahit_bin_71                        | 1.386282096 | -           |
| SZAXPI018280_95_RA_dental_metaspades_bin_19                | 1.859297516 | -           |
| SZAXPI018286_123_RA_dental_metaspades_bin_45               | 1.987126456 | -           |
| RDPYD18098889_A_saliva_metaspades_bin_64                   | 1.577480069 | -           |
| RDPYD18189905_A_saliva_metaspades_bin_29                   | 1.456748683 | -           |
| RDPYD18098912_A_saliva_metaspades_bin_38                   | 1.947343737 | -           |
| RDPYD18098496_A_saliva_metaspades_bin_7                    | 1.759875043 | -           |
| SZAXPI018318_20_RA_dental_metaspades_bin_22                | 1.740056022 | -           |
| SRR8114071_metaspades_bin_18                               | 1.656018082 | -           |
| RSZYD18078262_A_saliva_metaspades_bin_69                   | 1.533909153 | -           |
| RSZYD18078075_A_saliva_metaspades_bin_101                  | 1.588789415 | -           |
| SZAXPI018452_169_1_RA_saliva_metaspades_bin_16             | 2.003204543 | -           |
| RSZYD18078623_A_saliva_metaspades_bin_44                   | 1.486550696 | -           |
| RDPYD18300091_A_saliva_metaspades_bin_39                   | 1.634420761 | -           |
| RDPYD18088805_A_saliva_metaspades_bin_25                   | 1.815752555 | -           |
| GCA_934717805_1_ERR7745621_bin_22_genomic                  | 1.745007315 | -           |
| GCA_015257785_3_ASM1525778v3_genomic                       | 2.529838999 | -           |
| GCA_016866755_1_JGI_2017_08_21_genomic                     | 0           | 0.049672144 |
| R0170300272_tooth_RAH_megahit_bin_12                       | 0.819859232 | -           |
| R0170300181_tooth_RA_megahit_bin_83                        | 1.027844471 | -           |
| GCA_010014515_1_ASM1001451v1_genomic                       | 0.407394066 | 0.024046302 |
| GCA_002421965_1_ASM242196v1_genomic                        | 0.57656294  | 4.79E-05    |
| GCA_013100825_1_ASM1310082v1_genomic                       | 1.087600672 | -           |
| RSZAXPI002325_39_RAH_dental_metaspades_bin_28              | 1.077192875 | -           |
| GCA_013099195_1_ASM1309919v1_genomic                       | 1.172493123 | -           |
| GCA_010202465_1_ASM1020246v1_genomic                       | 1.022782975 | -           |
| GCA_005697565_1_ASM569756v1_genomic                        | 1.436300835 | -           |
| R0170300231_tooth_RA_megahit_bin_16                        | 1.06274183  | -           |
| R0170300157_tooth_RA_megahit_bin_55                        | 1.019275763 | -           |
| SZAXPI018174_30_RA_dental_metaspades_bin_36                | 1.293263607 | -           |
| GCA_013394755_1_ASM1339475v1_genomic                       | 1.124548625 | -           |
| SZAXPI018177_33_RA_dental_metaspades_bin_61                | 1.038912259 | -           |
| RSZAXPI002636_95_RA_dental_metaspades_bin_22               | 0.988630978 | -           |
| GCA_010202115_1_ASM1020211v1_genomic                       | 1.201900994 | -           |
| GCA_010202645_1_ASM1020264v1_genomic                       | 1.144555596 | -           |
| R0170300062_tooth_RA_megahit_bin_52                        | 1.765241169 | -           |
| R0170300092_tooth_RA_megahit_bin_69                        | 1.218880124 | -           |
| RSZAXPI002604_26_RA_dental_metaspades_bin_30               | 1.219789279 | -           |
| GCA_013099015_1_ASM1309901v1_genomic                       | 1.207997587 | -           |
| R0170300197_tooth_RA_megahit_bin_71                        | 2.031331122 | -           |
| R0170300179_tooth_RA_megahit_bin_1                         | 1.275722198 | -           |
| R0170300071_tooth_RA_megahit_bin_81                        | 1.309349936 | 0.028726642 |
| SZAXPI018181_37_RA_dental_metaspades_bin_31                | 1.340307134 | -           |
| GCA_013100805_1_ASM1310080v1_genomic                       | 1.034455471 | -           |
| GCA_905372305_1_SRR9217408_mag_bin_12_genomic              | 1.398862019 | 0.036966172 |
| SZAXPI018171_25_1_RA_dental_metaspades_bin_52              | 1.422325358 | -           |
| SZAXPI018098_19_RA_dental_metaspades_bin_53                | 1.45395996  | -           |
| R0170300309_tooth_RAH_megahit_bin_70                       | 1.376803873 | -           |
| RSZAXPI002620_35_RA_dental_metaspades_bin_1                | 1.494735228 | -           |
| SZAXPI018092_13_RA_dental_metaspades_bin_61                | 1.55897177  | -           |
| RSZAXPI002641_101_RA_dental_metaspades_bin_19              | 2.045313073 | -           |
| GCA_905372835_1_SRR9217428_mag_bin_30_genomic              | 1.688624463 | 0.029259656 |
| RSZAXPI002635_94_RA_dental_metaspades_bin_41               | 1.523424367 | -           |
| GCA_905373795_1_SRR9217490_mag_bin_5_genomic               | 1.456408942 | -           |
| R0170300304_tooth_RAH_megahit_bin_45                       | 1.624705506 | -           |
| SZAXPI018283_109_RA_dental_metaspades_bin_24               | 1.590782829 | -           |
| R0170300198_tooth_RA_megahit_bin_28                        | 1.520124141 | 0.028728741 |
| GCA_005697395_1_ASM569739v1_genomic                        | 2.020099354 | -           |
| R0170300189_tooth_RA_megahit_bin_69                        | 1.477367118 | -           |
| GCA_010202845_1_ASM1020284v1_genomic                       | 1.179758011 | -           |
| R0170300289_tooth_RAH_megahit_bin_75                       | 1.550571964 | -           |
| SZAXPI011699_166_RA_dental_metaspades_bin_36               | 1.492349775 | -           |
| GCA_947095985_1_SRR8786266_bin_1_metaWRAP_v1_3_MAG_genomic | 1.97580278  | 0.046338439 |
| YS000394_saliva_spades_bin_25                              | 2.153020496 | 0.01469269  |
| YS000678_saliva_spades_bin_12                              | 2.265544343 | 0.000382484 |
| RSZYD18078746_A_saliva_metaspades_bin_2                    | 2.166449577 | 0.002485629 |
| SZAXPI018317_19_RA_dental_metaspades_bin_31                | 1.623611807 | -           |
| YS000364_saliva_spades_bin_27                              | 2.253910626 | 8.86E-05    |
| RDPYD18093589_A_saliva_metaspades_bin_27                   | 2.115201268 | 0.00740459  |
| RSZYD18187312_A_saliva_metaspades_bin_49                   | 2.274945458 | 0.00444959  |
| RDPYD18189828_A_saliva_metaspades_bin_6                    | 2.477801724 | 0.001529088 |
| RSZAXPI002653_13_RA_saliva_metaspades_bin_70               | 2.353070657 | 0.000137971 |
| SRR8114009_metaspades_bin_3                                | 2.185252507 | 0.000415205 |
| RDPYD18098912_A_saliva_metaspades_bin_17                   | 2.480589288 | 0.046336284 |
| RSZYD18187466_A_saliva_metaspades_bin_39                   | 2.210983332 | 0.00122037  |
| RDPYD18098341_A_saliva_metaspades_bin_33                   | 2.312810302 | 0.001047117 |
| RSZYD18078153_A_saliva_metaspades_bin_25                   | 2.251723237 | 0.000342827 |
| RSZYD18187427_A_saliva_metaspades_bin_75                   | 2.246178517 | 0.013549413 |
| GCA_022819345_1_ASM2281934v1_genomic                       | 2.32910282  | 0.00231496  |
| GCA_022828245_1_ASM2282824v1_genomic                       | 2.352838508 | 0.001251579 |
| RSZYD18078773_A_saliva_metaspades_bin_71                   | 2.292832215 | 0.000126366 |
| RSZYD18078259_A_saliva_metaspades_bin_16                   | 2.306557294 | 0.007243479 |
| GCA_022828325_1_ASM2282832v1_genomic                       | 2.347058288 | 0.001729318 |
| GCA_904425485_1_PRJEB35131_2_genomic                       | 2.254884083 | 0.001908359 |
| GCA_022828375_1_ASM2282837v1_genomic                       | 2.3035814   | 0.001300257 |

|                                               |             |             |
|-----------------------------------------------|-------------|-------------|
| YS001069_saliva_spades_bin_6                  | 2.40099284  | 0.001190325 |
| RDPYD18189875_A_saliva_metaspades_bin_4       | 2.214274388 | 0.024762739 |
| RDPYD18300014_A_saliva_metaspades_bin_15      | 2.451032108 | 0.02794278  |
| RDPYD18088984_A_saliva_metaspades_bin_13      | 2.359293224 | 0.00415811  |
| YS000324_saliva_spades_bin_7                  | 2.333238816 | 0.016878824 |
| YS000915_saliva_spades_bin_1                  | 2.259339081 | 0.000934067 |
| GCA_022819365_1_ASM2281936v1_genomic          | 2.237222025 | 0.003706124 |
| YS000545_saliva_spades_bin_26                 | 2.349471837 | 0.007726776 |
| GCA_021222645_1_ASM2122264v1_genomic          | 2.356328874 | 0.016385584 |
| RSZYD18078161_A_saliva_metaspades_bin_1       | 2.351445227 | -           |
| RDPYD18201627_A_saliva_metaspades_bin_4       | 2.244848572 | 0.02500012  |
| SRR8114034_metaspades_bin_21                  | 2.209260986 | 0.001103001 |
| YS000758_saliva_spades_bin_5                  | 2.412103893 | 0.002373607 |
| YS000918_saliva_spades_bin_33                 | 2.340256997 | 0.001221097 |
| RSZYD18187656_A_saliva_metaspades_bin_41      | 2.302288394 | 0.000352185 |
| GCA_022828255_1_ASM2282825v1_genomic          | 2.286494263 | 0.001131001 |
| RDPYD18099019_A_saliva_metaspades_bin_28      | 2.309265269 | 0.00024521  |
| GCA_900555265_1_UMGS1805_genomic              | 2.248603443 | 0.000544135 |
| RSZYD18078343_A_saliva_metaspades_bin_21      | 2.39447909  | 0.000181918 |
| RSZYD18078188_A_saliva_metaspades_bin_16      | 2.507829768 | -           |
| RSZYD18187853_A_saliva_metaspades_bin_37      | 2.281774741 | 0.004984836 |
| YS000282_saliva_spades_bin_24                 | 2.306164889 | 0.000691588 |
| YS000726_saliva_spades_bin_20                 | 2.241854666 | 0.015284915 |
| YS000546_saliva_spades_bin_3                  | 2.251699924 | 0.007085692 |
| RSZYD18187722_A_saliva_metaspades_bin_7       | 2.35247441  | 0.023632181 |
| RDPYD18189916_A_saliva_metaspades_bin_45      | 2.307852218 | 0.017207515 |
| RSZYD18078550_A_saliva_metaspades_bin_59      | 2.309643877 | 0.006715851 |
| RDPYD18098770_A_saliva_metaspades_bin_53      | 2.399575277 | 0.011401437 |
| YS000208_saliva_spades_bin_26                 | 2.456850695 | 0.010070937 |
| SZAXPI018400_40_RA_saliva_metaspades_bin_35   | 2.387638298 | 0.021296631 |
| RDPYD18088830_A_saliva_metaspades_bin_38      | 2.388197251 | 0.007243479 |
| YS000205_saliva_spades_bin_1                  | 2.342319049 | 0.02768971  |
| RSZYD18187540_A_saliva_metaspades_bin_35      | 2.427639887 | 0.003796002 |
| RSZYD18187640_A_saliva_metaspades_bin_22      | 2.492617043 | 0.007483591 |
| YS000131_saliva_spades_bin_17                 | 2.402283051 | 0.002402439 |
| RDPYD18099005_A_saliva_metaspades_bin_66      | 2.278607102 | 0.003378446 |
| RSZAXPI002324_37_RAH_dental_metaspades_bin_42 | 2.290141703 | 0.033511424 |
| SRR8114041_metaspades_bin_6                   | 2.333061418 | 0.003538836 |
| YS000462_saliva_spades_bin_8                  | 2.289730964 | -           |
| RSZYD18187237_A_saliva_metaspades_bin_71      | 2.387944093 | 0.007646267 |
| YS001090_saliva_spades_bin_11                 | 2.324763839 | 0.001529965 |
| YS001132_saliva_spades_bin_25                 | 2.375442538 | 0.014988866 |
| RSZYD18187514_A_saliva_metaspades_bin_23      | 2.347979707 | 0.047133515 |
| RSZYD18187034_A_saliva_metaspades_bin_52      | 2.398979696 | 0.000970739 |
| YS000298_saliva_spades_bin_49                 | 2.329043503 | -           |
| RDPYD18201650_A_saliva_metaspades_bin_5       | 2.34486061  | 0.002802287 |
| RDPYD18300036_A_saliva_metaspades_bin_65      | 2.414878411 | 0.00897085  |
| GCA_946893605_1_PRJEB56001_genomic            | 2.286483808 | 0.010716672 |
| GCA_015257705_1_ASM1525770v1_genomic          | 2.38742263  | 0.000383078 |
| RDPYD18300328_A_saliva_metaspades_bin_32      | 2.487545447 | 0.004019276 |
| RSZYD18187848_A_saliva_metaspades_bin_3       | 2.354554594 | -           |
| RSZYD18078809_A_saliva_metaspades_bin_65      | 2.502116367 | -           |
| RSZYD18078609_A_saliva_metaspades_bin_12      | 2.292708195 | 0.032327355 |
| RSZYD18078399_A_saliva_metaspades_bin_40      | 2.408277937 | -           |
| RSZYD18187200_A_saliva_metaspades_bin_37      | 2.400573046 | 0.008968595 |
| ORT_AM08_428                                  | 3.382264635 | -           |
| ORT_TM06_249                                  | 3.459756336 | -           |
| ORT_TM06_193                                  | 3.080009867 | -           |
| ORT_AM09_9_O_104                              | 3.366590071 | -           |
| ORT_AM09_20_O_104                             | 3.339601862 | -           |
| ORS_AF10_24_BH                                | 3.356535993 | -           |
| ORT_AF10_C15                                  | 0.827038491 | -           |
| ORT_AM01_120                                  | 0.87104061  | -           |
| SEQF2477                                      | 2.34213069  | 0.033819029 |
| SEQF1730                                      | 2.290719663 | -           |
| SEQF1595                                      | 3.04833874  | -           |
| ORS_TM07_79                                   | 3.296039813 | -           |
| ORT_AM08_461                                  | 3.481068539 | -           |
| SEQF2462                                      | 2.465638273 | 0.001420009 |
| SEQF2771                                      | 2.328188971 | 6.01E-06    |
| SEQF1941                                      | 2.366056403 | 2.05E-05    |
| SEQF2078                                      | 1.011626602 | -           |
| SEQF1611                                      | 1.915167291 | -           |
| SEQF3158                                      | 1.378718777 | 0.023860174 |
| ODP_AM01_06                                   | 2.19879025  | 0.003382115 |
| SEQF1942                                      | 2.183212577 | 0.005955389 |
| SEQF2757                                      | 2.410645815 | 0.002262624 |
| ODP_AF04_83                                   | 3.498261085 | -           |
| SEQF1963                                      | 2.567373338 | 0.003461533 |
| ORS_TM07_40                                   | 2.188734996 | 5.46E-08    |



# Supplementary Table 6b. Correlation of Saccharibacterial clusters and related bacterial clusters differing in abundance in each group in HC group.

| bacterial cluster1                           | bacterial cluster2                           | ps          | correlation | P           | P.adjust (FDR) |
|----------------------------------------------|----------------------------------------------|-------------|-------------|-------------|----------------|
| RSZYD18187554_A_saliva_metaspades_bin_21     | RSZYD18078673_A_saliva_metaspades_bin_3      | 0.836518725 | positive    | 2.45137E-13 | 1.4915E-11     |
| RSZYD18187554_A_saliva_metaspades_bin_21     | RSZAXPI002682_32_RA_saliva_metaspades_bin_12 | 0.804625616 | positive    | 9.4551E-12  | 4.00648E-10    |
| RSZYD18187554_A_saliva_metaspades_bin_21     | RDPYD18189925_A_saliva_metaspades_bin_14     | 0.821706323 | positive    | 1.46283E-12 | 7.49532E-11    |
| RSZYD18187554_A_saliva_metaspades_bin_21     | GCA_022819385_1_ASM2281938v1_genomic         | 0.816883494 | positive    | 2.52642E-12 | 1.24251E-10    |
| RSZYD18187554_A_saliva_metaspades_bin_21     | RSZYD18187676_A_saliva_metaspades_bin_32     | 0.748250941 | positive    | 1.48676E-09 | 4.60933E-08    |
| RSZYD18187554_A_saliva_metaspades_bin_21     | RDPYD18075172_A_saliva_metaspades_bin_27     | 0.816583786 | positive    | 2.61213E-12 | 1.27953E-10    |
| RSZYD18187554_A_saliva_metaspades_bin_21     | RSZYD18187171_A_saliva_metaspades_bin_47     | 0.807655613 | positive    | 6.88316E-12 | 2.99969E-10    |
| RSZYD18078673_A_saliva_metaspades_bin_3      | RSZAXPI002682_32_RA_saliva_metaspades_bin_12 | 0.925839198 | positive    | 0           | 0              |
| RSZYD18078673_A_saliva_metaspades_bin_3      | RDPYD18189925_A_saliva_metaspades_bin_14     | 0.965593021 | positive    | 0           | 0              |
| RSZYD18078673_A_saliva_metaspades_bin_3      | GCA_022819385_1_ASM2281938v1_genomic         | 0.860554553 | positive    | 8.88178E-15 | 6.67278E-13    |
| RSZYD18078673_A_saliva_metaspades_bin_3      | RSZYD18187676_A_saliva_metaspades_bin_32     | 0.888599772 | positive    | 0           | 0              |
| RSZYD18078673_A_saliva_metaspades_bin_3      | RDPYD18075172_A_saliva_metaspades_bin_27     | 0.960850083 | positive    | 0           | 0              |
| RSZYD18078673_A_saliva_metaspades_bin_3      | RSZYD18187171_A_saliva_metaspades_bin_47     | 0.94604754  | positive    | 0           | 0              |
| RSZAXPI002682_32_RA_saliva_metaspades_bin_12 | RDPYD18189925_A_saliva_metaspades_bin_14     | 0.927755775 | positive    | 0           | 0              |
| RSZAXPI002682_32_RA_saliva_metaspades_bin_12 | GCA_022819385_1_ASM2281938v1_genomic         | 0.885869565 | positive    | 0           | 0              |
| RSZAXPI002682_32_RA_saliva_metaspades_bin_12 | RSZYD18187676_A_saliva_metaspades_bin_32     | 0.833371878 | positive    | 3.63709E-13 | 2.10093E-11    |
| RSZAXPI002682_32_RA_saliva_metaspades_bin_12 | RDPYD18075172_A_saliva_metaspades_bin_27     | 0.931020528 | positive    | 0           | 0              |
| RSZAXPI002682_32_RA_saliva_metaspades_bin_12 | RSZYD18187171_A_saliva_metaspades_bin_47     | 0.921684832 | positive    | 0           | 0              |
| RDPYD18189925_A_saliva_metaspades_bin_14     | GCA_022819385_1_ASM2281938v1_genomic         | 0.856812466 | positive    | 1.55431E-14 | 1.12628E-12    |
| RDPYD18189925_A_saliva_metaspades_bin_14     | RSZYD18187676_A_saliva_metaspades_bin_32     | 0.86363505  | positive    | 5.55112E-15 | 4.32987E-13    |
| RDPYD18189925_A_saliva_metaspades_bin_14     | RDPYD18075172_A_saliva_metaspades_bin_27     | 0.942611813 | positive    | 0           | 0              |
| RDPYD18189925_A_saliva_metaspades_bin_14     | RSZYD18187171_A_saliva_metaspades_bin_47     | 0.918936109 | positive    | 0           | 0              |
| GCA_022819385_1_ASM2281938v1_genomic         | RSZYD18187676_A_saliva_metaspades_bin_32     | 0.789084181 | positive    | 4.43618E-11 | 1.70299E-09    |
| GCA_022819385_1_ASM2281938v1_genomic         | RDPYD18075172_A_saliva_metaspades_bin_27     | 0.884475283 | positive    | 2.22045E-16 | 2.2107E-14     |
| GCA_022819385_1_ASM2281938v1_genomic         | RSZYD18187171_A_saliva_metaspades_bin_47     | 0.883640254 | positive    | 2.22045E-16 | 2.2107E-14     |
| RSZYD18187676_A_saliva_metaspades_bin_32     | RDPYD18075172_A_saliva_metaspades_bin_27     | 0.853599308 | positive    | 2.4869E-14  | 1.77061E-12    |
| RSZYD18187676_A_saliva_metaspades_bin_32     | RSZYD18187171_A_saliva_metaspades_bin_47     | 0.847330231 | positive    | 5.92859E-14 | 3.94574E-12    |
| RDPYD18075172_A_saliva_metaspades_bin_27     | RSZYD18187171_A_saliva_metaspades_bin_47     | 0.969845905 | positive    | 0           | 0              |
| SEQF1881                                     | RSZYD18187554_A_saliva_metaspades_bin_21     | 0.505984389 | positive    | 0.000285233 | 0.002158812    |
| SEQF2481                                     | RSZYD18187554_A_saliva_metaspades_bin_21     | 0.522767354 | positive    | 0.000163455 | 0.001357986    |
| SEQF2031                                     | RSZYD18187554_A_saliva_metaspades_bin_21     | 0.592714658 | positive    | 1.13555E-05 | 0.000136735    |
| SEQF2031                                     | RSZYD18078673_A_saliva_metaspades_bin_3      | 0.589412213 | positive    | 1.30621E-05 | 0.0001544      |
| SEQF2031                                     | RSZAXPI002682_32_RA_saliva_metaspades_bin_12 | 0.615518039 | positive    | 4.1338E-06  | 5.59365E-05    |
| SEQF2031                                     | RDPYD18189925_A_saliva_metaspades_bin_14     | 0.600329566 | positive    | 8.1735E-06  | 0.00010224     |
| SEQF2031                                     | GCA_022819385_1_ASM2281938v1_genomic         | 0.595860315 | positive    | 9.92338E-06 | 0.000121643    |
| SEQF2031                                     | RSZYD18187676_A_saliva_metaspades_bin_32     | 0.534574468 | positive    | 0.000108534 | 0.000963819    |
| SEQF2031                                     | RDPYD18075172_A_saliva_metaspades_bin_27     | 0.575657706 | positive    | 2.30267E-05 | 0.000252675    |
| SEQF2031                                     | RSZYD18187171_A_saliva_metaspades_bin_47     | 0.567430835 | positive    | 3.19361E-05 | 0.000336565    |
| SEQF2739                                     | RSZYD18078673_A_saliva_metaspades_bin_3      | 0.565819533 | positive    | 3.40143E-05 | 0.000355408    |
| SEQF2739                                     | RSZAXPI002682_32_RA_saliva_metaspades_bin_12 | 0.596207216 | positive    | 9.77609E-06 | 0.000120199    |
| SEQF2739                                     | RDPYD18189925_A_saliva_metaspades_bin_14     | 0.529386257 | positive    | 0.000130172 | 0.001122595    |
| SEQF2739                                     | GCA_022819385_1_ASM2281938v1_genomic         | 0.51699815  | positive    | 0.000198582 | 0.001609419    |
| SEQF2739                                     | RDPYD18075172_A_saliva_metaspades_bin_27     | 0.591095693 | positive    | 1.21646E-05 | 0.000145052    |
| SEQF2739                                     | RSZYD18187171_A_saliva_metaspades_bin_47     | 0.619062762 | positive    | 3.50757E-06 | 4.87557E-05    |
| SEQF2726                                     | RSZYD18187554_A_saliva_metaspades_bin_21     | 0.516970223 | positive    | 0.000198767 | 0.001609857    |
| ODP_AM09_2D21                                | RSZYD18187554_A_saliva_metaspades_bin_21     | 0.538594971 | positive    | 9.40789E-05 | 0.0008534      |
| ORT_AF03_41                                  | RSZYD18078673_A_saliva_metaspades_bin_3      | 0.504409176 | positive    | 0.000300094 | 0.002253189    |
| ORT_AF03_41                                  | RSZAXPI002682_32_RA_saliva_metaspades_bin_12 | 0.501618871 | positive    | 0.000328148 | 0.002422242    |
| ORT_AF03_41                                  | GCA_022819385_1_ASM2281938v1_genomic         | 0.513991674 | positive    | 0.000219482 | 0.001741919    |
| ORT_AF03_41                                  | RSZYD18187171_A_saliva_metaspades_bin_47     | 0.571420312 | positive    | 2.72818E-05 | 0.000292039    |
| ORS_AM09_12_BH                               | RSZYD18078673_A_saliva_metaspades_bin_3      | 0.564547379 | positive    | 3.57418E-05 | 0.000371242    |
| ORS_AM09_12_BH                               | RSZAXPI002682_32_RA_saliva_metaspades_bin_12 | 0.597710453 | positive    | 9.16084E-06 | 0.000113203    |
| ORS_AM09_12_BH                               | RDPYD18189925_A_saliva_metaspades_bin_14     | 0.573848689 | positive    | 2.47625E-05 | 0.000268119    |
| ORS_AM09_12_BH                               | GCA_022819385_1_ASM2281938v1_genomic         | 0.549722479 | positive    | 6.27373E-05 | 0.000602101    |
| ORS_AM09_12_BH                               | RDPYD18075172_A_saliva_metaspades_bin_27     | 0.575484245 | positive    | 2.31882E-05 | 0.000253992    |
| ORS_AM09_12_BH                               | RSZYD18187171_A_saliva_metaspades_bin_47     | 0.593738256 | positive    | 1.08698E-05 | 0.000131664    |
| ORS_TM06_107                                 | RSZYD18078673_A_saliva_metaspades_bin_3      | 0.513256431 | positive    | 0.000224888 | 0.001777909    |
| ORS_TM06_107                                 | RSZAXPI002682_32_RA_saliva_metaspades_bin_12 | 0.559551341 | positive    | 4.33337E-05 | 0.000437481    |
| ORS_TM06_107                                 | GCA_022819385_1_ASM2281938v1_genomic         | 0.573543016 | positive    | 2.50675E-05 | 0.00027118     |
| ORS_TM06_107                                 | RDPYD18075172_A_saliva_metaspades_bin_27     | 0.585198035 | positive    | 1.55827E-05 | 0.000179516    |
| ORS_TM06_107                                 | RSZYD18187171_A_saliva_metaspades_bin_47     | 0.588534559 | positive    | 1.35537E-05 | 0.000159442    |
| ORT_AF03_190                                 | RSZYD18187554_A_saliva_metaspades_bin_21     | 0.516507662 | positive    | 0.000201863 | 0.001630618    |
| ORT_AF05_233                                 | RSZYD18187554_A_saliva_metaspades_bin_21     | 0.512922811 | positive    | 0.000227381 | 0.001792984    |
| ORT_AF05_232                                 | RSZYD18187554_A_saliva_metaspades_bin_21     | 0.522520961 | positive    | 0.000164831 | 0.001368492    |
| ORS_TM06_130                                 | RSZYD18187554_A_saliva_metaspades_bin_21     | 0.545591212 | positive    | 7.30435E-05 | 0.000687013    |
| ORS_AM08_79                                  | RSZYD18187554_A_saliva_metaspades_bin_21     | 0.540387396 | positive    | 8.82195E-05 | 0.000808334    |
| ORS_AF04_134                                 | RSZYD18187554_A_saliva_metaspades_bin_21     | 0.512922811 | positive    | 0.000227381 | 0.001792984    |
| RSZYD18187554_A_saliva_metaspades_bin_21     | ORT_TM07_90                                  | 0.539346633 | positive    | 9.15799E-05 | 0.000833819    |
| RSZYD18187554_A_saliva_metaspades_bin_21     | ORT_AM09_5D4                                 | 0.536282163 | positive    | 0.000102164 | 0.000914543    |

# Supplementary Table 6c. Correlation of Saccharibacterial clusters and related bacterial clusters differing in abundance in each group in RA group.

| bacterial cluster1                           | bacterial cluster2                           | ps           | correlation | P           | P.adjust (FDR) |
|----------------------------------------------|----------------------------------------------|--------------|-------------|-------------|----------------|
| RSZYD18187554_A_saliva_metaspades_bin_21     | RSZYD18078673_A_saliva_metaspades_bin_3      | 0.871025083  | positive    | 2.22045E-16 | 2.09166E-14    |
| RSZYD18187554_A_saliva_metaspades_bin_21     | RSZAXPI002682_32_RA_saliva_metaspades_bin_12 | 0.801584826  | positive    | 2.67875E-12 | 1.54735E-10    |
| RSZYD18187554_A_saliva_metaspades_bin_21     | RDPYD18189925_A_saliva_metaspades_bin_14     | 0.821142116  | positive    | 2.81108E-13 | 1.8709E-11     |
| RSZYD18187554_A_saliva_metaspades_bin_21     | GCA_022819385_1_ASM2281938v1_genomic         | 0.871571971  | positive    | 2.22045E-16 | 2.09166E-14    |
| RSZYD18187554_A_saliva_metaspades_bin_21     | RSZYD18187676_A_saliva_metaspades_bin_32     | 0.864785691  | positive    | 4.44089E-16 | 4.02838E-14    |
| RSZYD18187554_A_saliva_metaspades_bin_21     | RDPYD18075172_A_saliva_metaspades_bin_27     | 0.718745497  | positive    | 4.15102E-09 | 1.49951E-07    |
| RSZYD18187554_A_saliva_metaspades_bin_21     | RSZYD18187171_A_saliva_metaspades_bin_47     | 0.870035061  | positive    | 2.22045E-16 | 2.09166E-14    |
| RSZYD18078673_A_saliva_metaspades_bin_3      | RSZAXPI002682_32_RA_saliva_metaspades_bin_12 | 0.877686805  | positive    | 0           | 0              |
| RSZYD18078673_A_saliva_metaspades_bin_3      | RDPYD18189925_A_saliva_metaspades_bin_14     | 0.898020953  | positive    | 0           | 0              |
| RSZYD18078673_A_saliva_metaspades_bin_3      | GCA_022819385_1_ASM2281938v1_genomic         | 0.874771841  | positive    | 0           | 0              |
| RSZYD18078673_A_saliva_metaspades_bin_3      | RSZYD18187676_A_saliva_metaspades_bin_32     | 0.919090297  | positive    | 0           | 0              |
| RSZYD18078673_A_saliva_metaspades_bin_3      | RDPYD18075172_A_saliva_metaspades_bin_27     | 0.721394954  | positive    | 3.42037E-09 | 1.26543E-07    |
| RSZYD18078673_A_saliva_metaspades_bin_3      | RSZYD18187171_A_saliva_metaspades_bin_47     | 0.884859266  | positive    | 0           | 0              |
| RSZAXPI002682_32_RA_saliva_metaspades_bin_12 | RDPYD18189925_A_saliva_metaspades_bin_14     | 0.803601875  | positive    | 2.14806E-12 | 1.27078E-10    |
| RSZAXPI002682_32_RA_saliva_metaspades_bin_12 | GCA_022819385_1_ASM2281938v1_genomic         | 0.847400651  | positive    | 8.43769E-15 | 6.7979E-13     |
| RSZAXPI002682_32_RA_saliva_metaspades_bin_12 | RSZYD18187676_A_saliva_metaspades_bin_32     | 0.918075298  | positive    | 0           | 0              |
| RSZAXPI002682_32_RA_saliva_metaspades_bin_12 | RDPYD18075172_A_saliva_metaspades_bin_27     | 0.689110339  | positive    | 3.14752E-08 | 9.31028E-07    |
| RSZAXPI002682_32_RA_saliva_metaspades_bin_12 | RSZYD18187171_A_saliva_metaspades_bin_47     | 0.835490457  | positive    | 4.4853E-14  | 3.30886E-12    |
| RDPYD18189925_A_saliva_metaspades_bin_14     | GCA_022819385_1_ASM2281938v1_genomic         | 0.814322079  | positive    | 6.35936E-13 | 4.05608E-11    |
| RDPYD18189925_A_saliva_metaspades_bin_14     | RSZYD18187676_A_saliva_metaspades_bin_32     | 0.894176974  | positive    | 0           | 0              |
| RDPYD18189925_A_saliva_metaspades_bin_14     | RDPYD18075172_A_saliva_metaspades_bin_27     | 0.697901157  | positive    | 1.77016E-08 | 5.73475E-07    |
| RDPYD18189925_A_saliva_metaspades_bin_14     | RSZYD18187171_A_saliva_metaspades_bin_47     | 0.829691177  | positive    | 9.61453E-14 | 6.72797E-12    |
| GCA_022819385_1_ASM2281938v1_genomic         | RSZYD18187676_A_saliva_metaspades_bin_32     | 0.916364512  | positive    | 0           | 0              |
| GCA_022819385_1_ASM2281938v1_genomic         | RDPYD18075172_A_saliva_metaspades_bin_27     | 0.77628356   | positive    | 3.50369E-11 | 1.66303E-09    |
| GCA_022819385_1_ASM2281938v1_genomic         | RSZYD18187171_A_saliva_metaspades_bin_47     | 0.893376879  | positive    | 0           | 0              |
| RSZYD18187676_A_saliva_metaspades_bin_32     | RDPYD18075172_A_saliva_metaspades_bin_27     | 0.706591429  | positive    | 9.81788E-09 | 3.33046E-07    |
| RSZYD18187676_A_saliva_metaspades_bin_32     | RSZYD18187171_A_saliva_metaspades_bin_47     | 0.849321649  | positive    | 6.43929E-15 | 5.25704E-13    |
| RDPYD18075172_A_saliva_metaspades_bin_27     | RSZYD18187171_A_saliva_metaspades_bin_47     | 0.843523366  | positive    | 1.4877E-14  | 1.15306E-12    |
| SEQF3533                                     | RSZAXPI002682_32_RA_saliva_metaspades_bin_12 | -0.550121252 | negative    | 3.49536E-05 | 0.000508967    |
| SEQF3533                                     | GCA_022819385_1_ASM2281938v1_genomic         | -0.514094993 | negative    | 0.000134074 | 0.001546021    |
| SEQF3533                                     | RSZYD18187676_A_saliva_metaspades_bin_32     | -0.53523494  | negative    | 6.20586E-05 | 0.000822478    |
| SEQF1914                                     | RSZYD18187554_A_saliva_metaspades_bin_21     | 0.512846374  | positive    | 0.000140095 | 0.001606146    |
| SEQF1914                                     | RSZYD18187171_A_saliva_metaspades_bin_47     | 0.542044857  | positive    | 4.78865E-05 | 0.000665628    |
| SEQF2031                                     | RSZYD18187554_A_saliva_metaspades_bin_21     | 0.557508527  | positive    | 2.60201E-05 | 0.000394359    |
| SEQF2031                                     | RSZYD18078673_A_saliva_metaspades_bin_3      | 0.640249778  | positive    | 5.53138E-07 | 1.2614E-05     |
| SEQF2031                                     | RSZAXPI002682_32_RA_saliva_metaspades_bin_12 | 0.705034935  | positive    | 1.0928E-08  | 3.64644E-07    |
| SEQF2031                                     | RDPYD18189925_A_saliva_metaspades_bin_14     | 0.598712964  | positive    | 4.3738E-06  | 8.16487E-05    |
| SEQF2031                                     | GCA_022819385_1_ASM2281938v1_genomic         | 0.567017243  | positive    | 1.761E-05   | 0.00028153     |
| SEQF2031                                     | RSZYD18187676_A_saliva_metaspades_bin_32     | 0.636749982  | positive    | 6.66276E-07 | 1.49163E-05    |
| SEQF2031                                     | RDPYD18075172_A_saliva_metaspades_bin_27     | 0.554338955  | positive    | 2.95583E-05 | 0.000440353    |
| SEQF2031                                     | RSZYD18187171_A_saliva_metaspades_bin_47     | 0.606300728  | positive    | 3.06401E-06 | 5.92762E-05    |
| SEQF2739                                     | RSZYD18078673_A_saliva_metaspades_bin_3      | 0.504755058  | positive    | 0.000185472 | 0.002038862    |
| SEQF2739                                     | RSZAXPI002682_32_RA_saliva_metaspades_bin_12 | 0.620615141  | positive    | 1.52593E-06 | 3.21075E-05    |
| SEQF2739                                     | RDPYD18075172_A_saliva_metaspades_bin_27     | 0.516496184  | positive    | 0.000123154 | 0.001436328    |
| SEQF2739                                     | RSZYD18187171_A_saliva_metaspades_bin_47     | 0.528406092  | positive    | 8.00389E-05 | 0.001023128    |
| ORS_AM09_12_BH                               | RSZYD18187554_A_saliva_metaspades_bin_21     | 0.564231862  | positive    | 1.97682E-05 | 0.000310361    |
| ORS_AM09_12_BH                               | RSZYD18078673_A_saliva_metaspades_bin_3      | 0.646109529  | positive    | 4.02914E-07 | 9.42191E-06    |
| ORS_AM09_12_BH                               | RSZAXPI002682_32_RA_saliva_metaspades_bin_12 | 0.625465197  | positive    | 1.19536E-06 | 2.56364E-05    |
| ORS_AM09_12_BH                               | RDPYD18189925_A_saliva_metaspades_bin_14     | 0.579791579  | positive    | 1.02227E-05 | 0.00017291     |
| ORS_AM09_12_BH                               | GCA_022819385_1_ASM2281938v1_genomic         | 0.571339387  | positive    | 1.46874E-05 | 0.000238544    |
| ORS_AM09_12_BH                               | RSZYD18187676_A_saliva_metaspades_bin_32     | 0.621719609  | positive    | 1.44393E-06 | 3.05395E-05    |
| ORS_AM09_12_BH                               | RDPYD18075172_A_saliva_metaspades_bin_27     | 0.635499211  | positive    | 7.11694E-07 | 1.57602E-05    |
| ORS_AM09_12_BH                               | RSZYD18187171_A_saliva_metaspades_bin_47     | 0.66239255   | positive    | 1.61041E-07 | 4.0662E-06     |
| ORS_TM06_107                                 | RDPYD18075172_A_saliva_metaspades_bin_27     | 0.517360613  | positive    | 0.000119426 | 0.001402194    |
| ORT_AF03_190                                 | RSZYD18187554_A_saliva_metaspades_bin_21     | 0.523507662  | positive    | 9.57453E-05 | 0.00117367     |
| ORT_AF03_190                                 | RSZYD18078673_A_saliva_metaspades_bin_3      | 0.540441898  | positive    | 5.09253E-05 | 0.000699138    |
| ORT_AF03_190                                 | RDPYD18189925_A_saliva_metaspades_bin_14     | 0.502665324  | positive    | 0.000199186 | 0.002164354    |
| ORT_AF03_190                                 | RDPYD18075172_A_saliva_metaspades_bin_27     | 0.518128994  | positive    | 0.000116199 | 0.001369556    |
| ORT_AF03_190                                 | RSZYD18187171_A_saliva_metaspades_bin_47     | 0.604475823  | positive    | 3.34064E-06 | 6.42221E-05    |
| ORT_AF05_233                                 | RSZYD18187554_A_saliva_metaspades_bin_21     | 0.522162995  | positive    | 0.000100524 | 0.00122125     |
| ORT_AF05_233                                 | RSZYD18078673_A_saliva_metaspades_bin_3      | 0.526512983  | positive    | 8.58058E-05 | 0.001076617    |
| ORT_AF05_233                                 | RSZAXPI002682_32_RA_saliva_metaspades_bin_12 | 0.501236524  | positive    | 0.000209086 | 0.00225393     |
| ORT_AF05_233                                 | RDPYD18189925_A_saliva_metaspades_bin_14     | 0.502089038  | positive    | 0.000203126 | 0.002199367    |
| ORT_AF05_233                                 | RDPYD18075172_A_saliva_metaspades_bin_27     | 0.505642801  | positive    | 0.000179911 | 0.001986646    |
| ORT_AF05_233                                 | RSZYD18187171_A_saliva_metaspades_bin_47     | 0.593430344  | positive    | 5.57382E-06 | 0.000100231    |
| ORS_TM06_130                                 | RSZYD18187554_A_saliva_metaspades_bin_21     | 0.521010424  | positive    | 0.000104793 | 0.001263084    |
| ORS_TM06_130                                 | RSZYD18078673_A_saliva_metaspades_bin_3      | 0.549903954  | positive    | 3.52547E-05 | 0.000512133    |
| ORS_TM06_130                                 | RSZAXPI002682_32_RA_saliva_metaspades_bin_12 | 0.500756321  | positive    | 0.000212512 | 0.002286841    |
| ORS_TM06_130                                 | RDPYD18189925_A_saliva_metaspades_bin_14     | 0.511021469  | positive    | 0.000149339 | 0.001696482    |
| ORS_TM06_130                                 | RDPYD18075172_A_saliva_metaspades_bin_27     | 0.531575664  | positive    | 7.11719E-05 | 0.000928191    |
| ORS_TM06_130                                 | RSZYD18187171_A_saliva_metaspades_bin_47     | 0.620707874  | positive    | 1.51888E-06 | 3.20142E-05    |
| ORS_AM08_79                                  | RSZYD18187554_A_saliva_metaspades_bin_21     | 0.526677234  | positive    | 8.52908E-05 | 0.001074559    |
| ORS_AM08_79                                  | RSZYD18078673_A_saliva_metaspades_bin_3      | 0.55609992   | positive    | 2.75414E-05 | 0.00041383     |
| ORS_AM08_79                                  | RSZAXPI002682_32_RA_saliva_metaspades_bin_12 | 0.507959375  | positive    | 0.000166106 | 0.001855966    |
| ORS_AM08_79                                  | RDPYD18189925_A_saliva_metaspades_bin_14     | 0.522162995  | positive    | 0.000100524 | 0.00122125     |
| ORS_AM08_79                                  | RDPYD18075172_A_saliva_metaspades_bin_27     | 0.527541663  | positive    | 8.26267E-05 | 0.001046377    |
| ORS_AM08_79                                  | RSZYD18187171_A_saliva_metaspades_bin_47     | 0.622436731  | positive    | 1.3929E-06  | 2.95623E-05    |
| ORS_AF04_134                                 | RSZYD18187554_A_saliva_metaspades_bin_21     | 0.538587142  | positive    | 5.46617E-05 | 0.000742753    |
| ORS_AF04_134                                 | RSZYD18078673_A_saliva_metaspades_bin_3      | 0.554947182  | positive    | 2.88468E-05 | 0.000432384    |
| ORS_AF04_134                                 | RSZAXPI002682_32_RA_saliva_metaspades_bin_12 | 0.519580302  | positive    | 0.000110319 | 0.001312897    |
| ORS_AF04_134                                 | RDPYD18189925_A_saliva_metaspades_bin_14     | 0.509676802  | positive    | 0.000156502 | 0.001771284    |
| ORS_AF04_134                                 | RSZYD18187676_A_saliva_metaspades_bin_32     | 0.507191049  | positive    | 0.000170574 | 0.001898955    |
| ORS_AF04_134                                 | RDPYD18075172_A_saliva_metaspades_bin_27     | 0.50285742   | positive    | 0.000197888 | 0.002154072    |
| ORS_AF04_134                                 | RSZYD18187171_A_saliva_metaspades_bin_47     | 0.597944583  | positive    | 4.53201E-06 | 8.40894E-05    |
| RSZYD18187554_A_saliva_metaspades_bin_21     | ORT_TM07_90                                  | 0.506603278  | positive    | 0.000174066 | 0.001929055    |

|                                          |             |             |          |             |             |
|------------------------------------------|-------------|-------------|----------|-------------|-------------|
| RSZYD18187554_A_saliva_metaspades_bin_21 | SEQF2726    | 0.505258611 | positive | 0.000182299 | 0.002007582 |
| RSZYD18078673_A_saliva_metaspades_bin_3  | ORT_TM07_90 | 0.527761783 | positive | 8.19606E-05 | 0.001042253 |
| RSZYD18078673_A_saliva_metaspades_bin_3  | SEQF2726    | 0.521661879 | positive | 0.00010236  | 0.001241093 |
| RDPYD18075172_A_saliva_metaspades_bin_27 | ORT_TM07_90 | 0.523315567 | positive | 9.6415E-05  | 0.001180698 |
| RDPYD18075172_A_saliva_metaspades_bin_27 | SEQF2726    | 0.527541663 | positive | 8.26267E-05 | 0.001046377 |
| RSZYD18187171_A_saliva_metaspades_bin_47 | ORT_TM07_90 | 0.614176634 | positive | 2.09683E-06 | 4.25833E-05 |
| RSZYD18187171_A_saliva_metaspades_bin_47 | SEQF2726    | 0.61312011  | positive | 2.2076E-06  | 4.43912E-05 |

---
